# Supplementary material for: De‐identification procedures for magnetic resonance images and the impact on structural brain measures at different ages
Source: PubMed Central journal article supplement (PMC8249889; doi:10.1002/hbm.25459), 2021-05-11
Supplement: HBM-42-3643-s001.pdf [file HBM-42-3643-s001.pdf]

# De-identification procedures for magnetic resonance images and the impact on structural brain measures at different ages

## Supplementary Tables and figures

Elizabeth E.L. Buimer<sup>1\*</sup>, Hugo G. Schnack<sup>1</sup>, Yaron Caspi<sup>1</sup>, Neeltje E.M. van Haren<sup>1,2</sup>, Mikhail Milchenko<sup>3</sup>, Pascal Pas<sup>1</sup>, Alzheimer's Disease Neuroimaging Initiative<sup>4</sup>, Hilleke E. Hulshoff Pol<sup>1</sup>, Rachel M. Brouwer<sup>1</sup>

*\*Corresponding author: Heidelberglaan 100 (Room A01.161), 3584CX Utrecht, The Netherlands. 0031-887556365, e.e.l.buimer@umcutrecht.nl*

### Table of Contents

|                                                                                                                                                                |    |
|----------------------------------------------------------------------------------------------------------------------------------------------------------------|----|
| Figure S1. ICC of cortical volume derived from original versus de-identified scans.                                                                            | 2  |
| Figure S2. ICC of cortical surface area derived from original versus de-identified scans.                                                                      | 2  |
| Table S1. Effects of de-identification on brain measures in children.                                                                                          | 3  |
| Table S2. Effects of de-identification on brain measures in young adults.                                                                                      | 10 |
| Table S3. Effects of de-identification on brain measures in older adults.                                                                                      | 17 |
| Table S4. Effects of de-identification on brain measures in older adults diagnosed with Alzheimer's disease.                                                   | 24 |
| Table S5. Effects of de-identification on brain measures in older adults without cognitive impairment.                                                         | 31 |
| Figure S3. De-identification properties and invasiveness of masks with varying coarseness.                                                                     | 38 |
| Figure S4. ICC between brain measures in children derived from original scans versus scans subjected to different mask settings.                               | 39 |
| Figure S5. ICC between brain measures in adults derived from original scans versus scans subjected to different mask settings.                                 | 39 |
| Table S6. Effects of de-identification on test-retest reliability in young adults: Means, coefficients of variation and t-tests                                | 40 |
| Table S7. Effects of de-identification on test-retest reliability in young adults: Average signed and absolute percentage differences                          | 47 |
| Table S8. Effects of de-identification on test-retest reliability in young adults: Pearson's correlation coefficients and intra-class correlation coefficients | 53 |

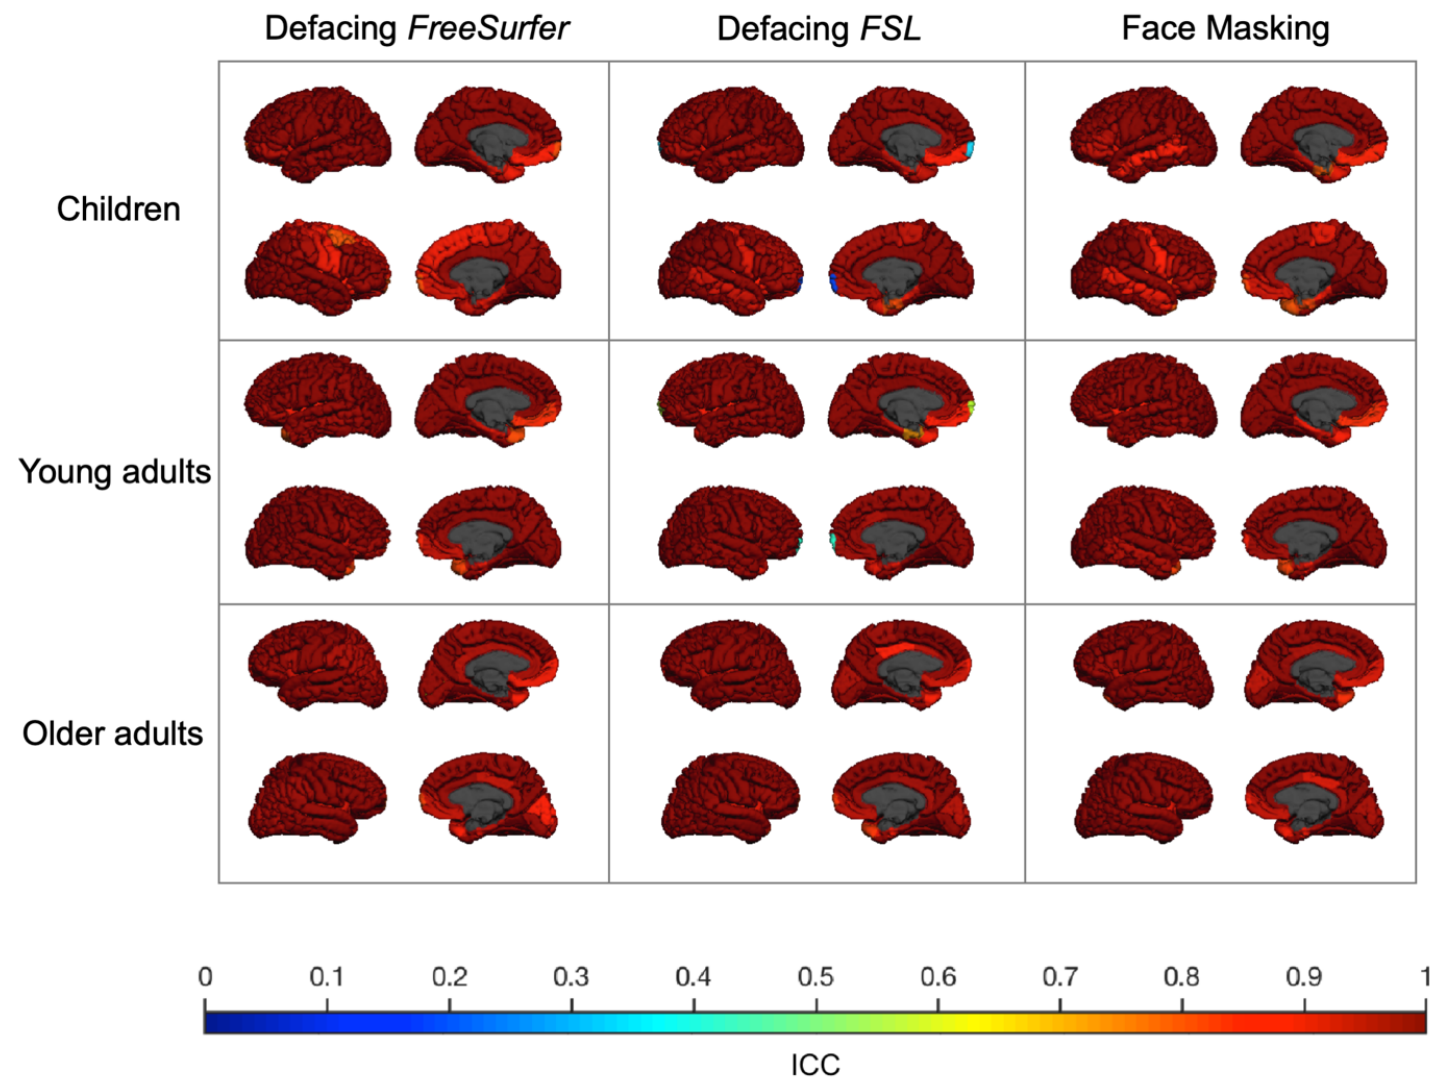

**Figure S1. ICC of cortical volume derived from original versus de-identified scans.**

The ICC for each sample (children, young adults and older adults) is plotted on the corresponding average scan. Each column shows a different de-identification technique. Within each square, the left hemisphere (top) and the right hemisphere (bottom) are shown from an outer and medial view. The lowest ICC (0.21) was found in the right frontal pole in children using *FSL* defacing.

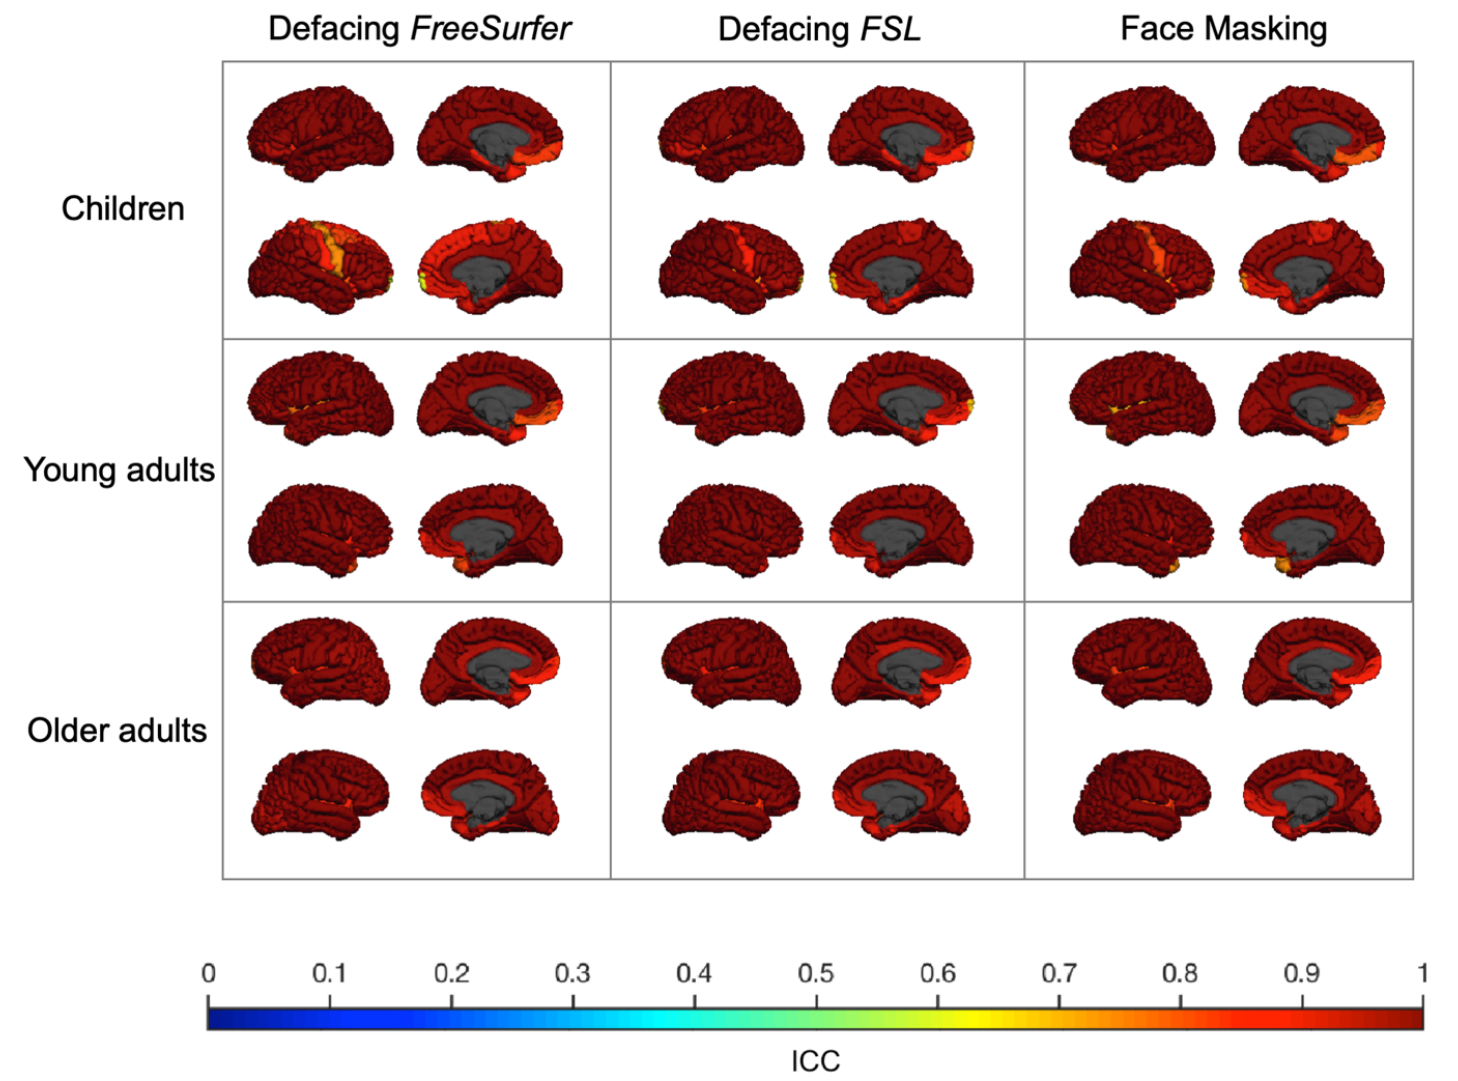

**Figure S2. ICC of cortical surface area derived from original versus de-identified scans.**

The ICC for each sample (children, young adults and older adults) is plotted on the corresponding average scan. Each column shows a different de-identification technique. Within each square, the left hemisphere (top) and the right hemisphere (bottom) are shown from an outer and medial view. The lowest ICC (0.61) was found in the right frontal pole in children using *FreeSurfer* defacing.

**Table S1. Effects of de-identification on brain measures in children.**

| Brain metric                          | Mean (SD)       |                 |                 |                 | Coefficient of Variation |       |        |       | Paired t-test t(p) |                 |                 | Signed PD in %   |                  |                  | Absolute PD (%) |                 |                | Pearson's r |        |      | ICC (95% CI)        |                     |                     |
|---------------------------------------|-----------------|-----------------|-----------------|-----------------|--------------------------|-------|--------|-------|--------------------|-----------------|-----------------|------------------|------------------|------------------|-----------------|-----------------|----------------|-------------|--------|------|---------------------|---------------------|---------------------|
|                                       | Orig            | FS df           | FSL df          | FM              | Orig                     | FS df | FSL df | FM    | FS df              | FSL df          | FM              | FS df            | FSL df           | FM               | FS df           | FSL df          | FM             | FS df       | FSL df | FM   | FS df               | FSL df              | FM                  |
| <b>Subcortical volume (ml)</b>        |                 |                 |                 |                 |                          |       |        |       |                    |                 |                 |                  |                  |                  |                 |                 |                |             |        |      |                     |                     |                     |
| Left thalamus                         | 7.43<br>(0.62)  | 7.46<br>(0.61)  | 7.44<br>(0.62)  | 7.43<br>(0.64)  | 8.37                     | 8.18  | 8.29   | 8.60  | -1.06<br>(0.30)    | -0.39<br>(0.70) | -0.18<br>(0.86) | 0.40<br>(1.80)   | 0.16<br>(1.96)   | 0.04<br>(1.53)   | 1.48<br>(1.06)  | 1.35<br>(1.40)  | 1.31<br>(0.73) | 0.98        | 0.97   | 0.98 | 0.98<br>(0.95-0.99) | 0.97<br>(0.94-0.99) | 0.98<br>(0.96-0.99) |
| Left caudatus                         | 3.98<br>(0.46)  | 3.98<br>(0.45)  | 3.98<br>(0.44)  | 3.97<br>(0.45)  | 11.46                    | 11.22 | 11.10  | 11.24 | -0.09<br>(0.93)    | -0.10<br>(0.92) | 0.38<br>(0.71)  | 0.06<br>(1.80)   | 0.08<br>(1.85)   | -0.12<br>(1.91)  | 1.28<br>(1.24)  | 1.28<br>(1.31)  | 1.45<br>(1.22) | 0.99        | 0.99   | 0.99 | 0.99<br>(0.97-1.00) | 0.99<br>(0.97-0.99) | 0.99<br>(0.97-0.99) |
| Left putamen                          | 5.33<br>(0.50)  | 5.35<br>(0.54)  | 5.36<br>(0.51)  | 5.34<br>(0.52)  | 9.37                     | 10.07 | 9.51   | 9.75  | -1.06<br>(0.30)    | -2.22<br>(0.04) | -0.63<br>(0.53) | 0.37<br>(2.25)   | 0.70<br>(1.58)   | 0.20<br>(1.87)   | 1.67<br>(1.52)  | 1.36<br>(1.04)  | 1.28<br>(1.36) | 0.98        | 0.99   | 0.98 | 0.98<br>(0.95-0.99) | 0.98<br>(0.96-0.99) | 0.98<br>(0.96-0.99) |
| Left pallidum                         | 1.79<br>(0.18)  | 1.77<br>(0.15)  | 1.77<br>(0.16)  | 1.77<br>(0.17)  | 10.10                    | 8.33  | 8.79   | 9.79  | 0.90<br>(0.38)     | 1.34<br>(0.19)  | 1.34<br>(0.19)  | -0.92<br>(6.03)  | -0.89<br>(3.49)  | -1.04<br>(3.81)  | 4.65<br>(3.84)  | 2.45<br>(2.60)  | 2.89<br>(2.64) | 0.80        | 0.93   | 0.92 | 0.79<br>(0.58-0.90) | 0.92<br>(0.83-0.96) | 0.92<br>(0.82-0.96) |
| Left hippocampus                      | 3.95<br>(0.32)  | 3.97<br>(0.31)  | 3.95<br>(0.33)  | 3.93<br>(0.31)  | 8.22                     | 7.93  | 8.34   | 7.98  | -1.30<br>(0.20)    | -0.13<br>(0.89) | 1.24<br>(0.23)  | 0.41<br>(1.42)   | 0.05<br>(2.00)   | -0.46<br>(1.98)  | 1.27<br>(0.71)  | 1.58<br>(1.18)  | 1.53<br>(1.30) | 0.98        | 0.97   | 0.97 | 0.98<br>(0.96-0.99) | 0.97<br>(0.94-0.99) | 0.97<br>(0.93-0.99) |
| Left amygdala                         | 1.61<br>(0.20)  | 1.61<br>(0.18)  | 1.60<br>(0.19)  | 1.58<br>(0.18)  | 12.47                    | 11.47 | 11.93  | 11.48 | 0.73<br>(0.47)     | 1.12<br>(0.27)  | 2.69<br>(0.01)  | -0.43<br>(4.00)  | -0.80<br>(3.89)  | -2.21<br>(4.36)  | 3.23<br>(2.31)  | 3.19<br>(2.28)  | 4.04<br>(2.66) | 0.95        | 0.95   | 0.94 | 0.95<br>(0.89-0.98) | 0.95<br>(0.89-0.98) | 0.92<br>(0.79-0.97) |
| Left accumbens                        | 0.70<br>(0.13)  | 0.69<br>(0.12)  | 0.70<br>(0.12)  | 0.71<br>(0.11)  | 18.05                    | 17.82 | 17.41  | 16.19 | 1.51<br>(0.14)     | -0.49<br>(0.63) | -1.24<br>(0.23) | -1.69<br>(6.27)  | 0.90<br>(8.46)   | 2.11<br>(7.58)   | 5.30<br>(3.62)  | 6.84<br>(4.86)  | 6.38<br>(4.45) | 0.95        | 0.88   | 0.91 | 0.95<br>(0.88-0.98) | 0.88<br>(0.75-0.95) | 0.91<br>(0.80-0.96) |
| Right thalamus                        | 7.23<br>(0.60)  | 7.24<br>(0.61)  | 7.26<br>(0.61)  | 7.26<br>(0.64)  | 8.25                     | 8.40  | 8.44   | 8.83  | -0.34<br>(0.74)    | -1.80<br>(0.08) | -1.27<br>(0.22) | 0.09<br>(1.48)   | 0.43<br>(1.26)   | 0.31<br>(1.40)   | 1.21<br>(0.82)  | 1.06<br>(0.78)  | 1.08<br>(0.92) | 0.98        | 0.99   | 0.99 | 0.98<br>(0.96-0.99) | 0.99<br>(0.97-0.99) | 0.99<br>(0.97-0.99) |
| Right caudatus                        | 4.13<br>(0.46)  | 4.14<br>(0.46)  | 4.14<br>(0.46)  | 4.13<br>(0.47)  | 11.24                    | 11.07 | 11.21  | 11.41 | -1.41<br>(0.17)    | -1.29<br>(0.21) | -0.56<br>(0.58) | 0.33<br>(1.16)   | 0.31<br>(1.21)   | 0.13<br>(1.87)   | 0.94<br>(0.74)  | 1.05<br>(0.64)  | 1.13<br>(1.49) | 1.00        | 0.99   | 0.99 | 0.99<br>(0.99-1.00) | 0.99<br>(0.99-1.00) | 0.99<br>(0.98-1.00) |
| Right putamen                         | 5.29<br>(0.53)  | 5.32<br>(0.53)  | 5.33<br>(0.51)  | 5.32<br>(0.53)  | 9.99                     | 9.97  | 9.60   | 9.98  | -1.91<br>(0.07)    | -2.30<br>(0.03) | -1.91<br>(0.07) | 0.59<br>(1.59)   | 0.85<br>(1.95)   | 0.59<br>(1.57)   | 1.16<br>(1.21)  | 1.32<br>(1.66)  | 1.29<br>(1.04) | 0.99        | 0.98   | 0.99 | 0.99<br>(0.97-0.99) | 0.98<br>(0.95-0.99) | 0.99<br>(0.97-0.99) |
| Right pallidum                        | 1.70<br>(0.14)  | 1.71<br>(0.15)  | 1.70<br>(0.14)  | 1.69<br>(0.15)  | 8.48                     | 8.86  | 8.27   | 8.66  | -1.83<br>(0.08)    | 0.08<br>(0.93)  | 0.86<br>(0.40)  | 0.88<br>(2.48)   | -0.03<br>(2.34)  | -0.34<br>(1.87)  | 1.93<br>(1.76)  | 1.78<br>(1.48)  | 1.50<br>(1.13) | 0.96        | 0.96   | 0.98 | 0.95<br>(0.90-0.98) | 0.96<br>(0.91-0.98) | 0.98<br>(0.95-0.99) |
| Right hippocampus                     | 4.01<br>(0.30)  | 4.01<br>(0.31)  | 4.01<br>(0.32)  | 3.99<br>(0.31)  | 7.57                     | 7.67  | 8.02   | 7.82  | 0.00<br>(1.00)     | -0.19<br>(0.85) | 1.09<br>(0.28)  | 0.00<br>(2.08)   | 0.04<br>(2.10)   | -0.47<br>(2.04)  | 1.53<br>(1.37)  | 1.50<br>(1.44)  | 1.62<br>(1.28) | 0.96        | 0.97   | 0.96 | 0.96<br>(0.92-0.98) | 0.96<br>(0.92-0.98) | 0.96<br>(0.92-0.98) |
| Right amygdala                        | 1.72<br>(0.20)  | 1.69<br>(0.21)  | 1.71<br>(0.19)  | 1.68<br>(0.19)  | 11.86                    | 12.16 | 11.29  | 11.49 | 2.47<br>(0.02)     | 0.83<br>(0.41)  | 3.12<br>(0.00)  | -2.07<br>(3.86)  | -0.53<br>(3.37)  | -2.37<br>(3.76)  | 3.26<br>(2.88)  | 2.92<br>(1.67)  | 3.41<br>(2.81) | 0.94        | 0.96   | 0.95 | 0.93<br>(0.83-0.97) | 0.96<br>(0.90-0.98) | 0.93<br>(0.78-0.97) |
| Right accumbens                       | 0.66<br>(0.10)  | 0.66<br>(0.10)  | 0.68<br>(0.11)  | 0.67<br>(0.11)  | 14.85                    | 15.21 | 16.13  | 16.41 | -0.10<br>(0.92)    | -2.01<br>(0.06) | -0.81<br>(0.42) | 0.12<br>(7.85)   | 2.08<br>(5.56)   | 0.93<br>(6.84)   | 6.03<br>(4.88)  | 4.83<br>(3.33)  | 5.79<br>(3.57) | 0.87        | 0.94   | 0.90 | 0.87<br>(0.73-0.94) | 0.93<br>(0.83-0.97) | 0.90<br>(0.79-0.95) |
| <b>Ventricular volume (ml)</b>        |                 |                 |                 |                 |                          |       |        |       |                    |                 |                 |                  |                  |                  |                 |                 |                |             |        |      |                     |                     |                     |
| Third ventricle                       | 0.83<br>(0.27)  | 0.83<br>(0.26)  | 0.83<br>(0.27)  | 0.83<br>(0.26)  | 32.48                    | 31.80 | 32.72  | 31.97 | -0.47<br>(0.64)    | 0.22<br>(0.83)  | 0.06<br>(0.95)  | 0.38<br>(2.98)   | -0.23<br>(3.30)  | 0.04<br>(3.57)   | 2.11<br>(2.10)  | 2.29<br>(2.33)  | 2.70<br>(2.27) | 1.00        | 1.00   | 0.99 | 1.00<br>(0.99-1.00) | 1.00<br>(0.99-1.00) | 1.00<br>(0.99-1.00) |
| Left lateral ventricle                | 6.63<br>(3.84)  | 6.65<br>(3.85)  | 6.66<br>(3.85)  | 6.64<br>(3.85)  | 57.88                    | 57.88 | 57.84  | 57.91 | -1.31<br>(0.20)    | -2.03<br>(0.05) | -0.82<br>(0.42) | 0.33<br>(1.80)   | 0.58<br>(1.75)   | 0.27<br>(2.51)   | 1.21<br>(1.35)  | 1.10<br>(1.46)  | 1.29<br>(2.15) | 1.00        | 1.00   | 1.00 | 1.00<br>(1.00-1.00) | 1.00<br>(1.00-1.00) | 1.00<br>(1.00-1.00) |
| Left inferior lateral ventricle       | 0.42<br>(0.18)  | 0.41<br>(0.16)  | 0.40<br>(0.17)  | 0.40<br>(0.15)  | 41.40                    | 40.39 | 42.40  | 37.19 | 2.16<br>(0.04)     | 3.34<br>(0.00)  | 2.22<br>(0.04)  | -3.81<br>(11.60) | -7.18<br>(12.34) | -3.68<br>(11.75) | 8.00<br>(9.11)  | 11.19<br>(8.70) | 9.03<br>(8.21) | 0.98        | 0.97   | 0.97 | 0.98<br>(0.94-0.99) | 0.96<br>(0.87-0.99) | 0.96<br>(0.89-0.98) |
| Right lateral ventricle               | 6.05<br>(2.63)  | 6.06<br>(2.61)  | 6.06<br>(2.62)  | 6.04<br>(2.61)  | 43.41                    | 43.14 | 43.29  | 43.21 | -0.79<br>(0.44)    | -0.90<br>(0.37) | 0.64<br>(0.53)  | 0.36<br>(1.66)   | 0.23<br>(0.97)   | 0.00<br>(1.27)   | 1.01<br>(1.35)  | 0.75<br>(0.64)  | 0.91<br>(0.87) | 1.00        | 1.00   | 1.00 | 1.00<br>(1.00-1.00) | 1.00<br>(1.00-1.00) | 1.00<br>(1.00-1.00) |
| Right inferior lateral ventricle      | 0.41<br>(0.11)  | 0.41<br>(0.11)  | 0.41<br>(0.13)  | 0.40<br>(0.12)  | 27.55                    | 26.60 | 31.59  | 28.62 | 0.01<br>(0.99)     | -0.13<br>(0.90) | 0.40<br>(0.69)  | 0.29<br>(5.70)   | -1.17<br>(12.65) | -1.03<br>(8.27)  | 4.26<br>(3.69)  | 7.58<br>(10.08) | 5.10<br>(6.51) | 0.98        | 0.94   | 0.97 | 0.98<br>(0.96-0.99) | 0.93<br>(0.86-0.97) | 0.97<br>(0.93-0.99) |
| <b>Local cortical volume (ml)</b>     |                 |                 |                 |                 |                          |       |        |       |                    |                 |                 |                  |                  |                  |                 |                 |                |             |        |      |                     |                     |                     |
| Left banks superior temporal sulcus   | 3.00<br>(0.41)  | 3.01<br>(0.48)  | 3.01<br>(0.42)  | 2.96<br>(0.41)  | 13.74                    | 16.07 | 14.09  | 13.92 | -0.37<br>(0.71)    | -0.66<br>(0.52) | 1.36<br>(0.19)  | 0.05<br>(5.08)   | 0.37<br>(3.43)   | -1.27<br>(4.52)  | 3.82<br>(3.26)  | 2.67<br>(2.11)  | 3.83<br>(2.61) | 0.95        | 0.97   | 0.94 | 0.94 (0.88-0.98)    | 0.97 (0.93-0.99)    | 0.94 (0.87-0.97)    |
| Left caudal anterior cingulate cortex | 2.14<br>(0.47)  | 2.14<br>(0.50)  | 2.16<br>(0.48)  | 2.16<br>(0.49)  | 22.01                    | 23.39 | 22.40  | 22.81 | 0.27<br>(0.79)     | -0.99<br>(0.33) | -1.23<br>(0.23) | -0.46<br>(2.94)  | 0.84<br>(5.23)   | 0.58<br>(3.15)   | 2.24<br>(1.91)  | 3.19<br>(4.18)  | 2.24<br>(2.25) | 0.99        | 0.97   | 0.99 | 0.99 (0.98-1.00)    | 0.97 (0.94-0.99)    | 0.99 (0.98-1.00)    |
| Left caudal middle frontal gyrus      | 8.23<br>(1.50)  | 8.18<br>(1.55)  | 8.22<br>(1.61)  | 8.29<br>(1.54)  | 18.24                    | 18.92 | 19.59  | 18.62 | 0.88<br>(0.39)     | 0.11<br>(0.91)  | -1.36<br>(0.19) | -0.64<br>(3.05)  | -0.24<br>(2.98)  | 0.73<br>(3.03)   | 2.31<br>(2.04)  | 2.31<br>(1.84)  | 2.34<br>(2.01) | 0.99        | 0.99   | 0.99 | 0.99 (0.97-0.99)    | 0.99 (0.97-0.99)    | 0.99 (0.97-0.99)    |
| Left cuneus                           | 4.21<br>(0.65)  | 4.19<br>(0.64)  | 4.19<br>(0.64)  | 4.20<br>(0.65)  | 15.41                    | 15.18 | 15.25  | 15.48 | 0.69<br>(0.50)     | 1.13<br>(0.27)  | 0.25<br>(0.81)  | -0.30<br>(2.35)  | -0.40<br>(1.93)  | -0.10<br>(2.20)  | 1.85<br>(1.43)  | 1.48<br>(1.26)  | 1.80<br>(1.21) | 0.99        | 0.99   | 0.99 | 0.99 (0.97-0.99)    | 0.99 (0.98-1.00)    | 0.99 (0.98-1.00)    |
| Left entorhinal cortex                | 2.11<br>(0.34)  | 2.09<br>(0.37)  | 2.12<br>(0.41)  | 2.13<br>(0.45)  | 16.11                    | 17.68 | 19.23  | 20.91 | 0.49<br>(0.63)     | -0.15<br>(0.88) | -0.37<br>(0.71) | -1.04<br>(9.12)  | -0.04<br>(8.85)  | 0.16<br>(11.73)  | 6.38<br>(6.47)  | 6.94<br>(5.32)  | 8.30<br>(8.12) | 0.85        | 0.87   | 0.81 | 0.85 (0.70-0.93)    | 0.86 (0.71-0.94)    | 0.78 (0.57-0.90)    |
| Left fusiform gyrus                   | 11.89<br>(1.10) | 11.79<br>(1.05) | 11.76<br>(1.13) | 11.79<br>(1.12) | 9.29                     | 8.89  | 9.65   | 9.50  | 1.69<br>(0.10)     | 2.17<br>(0.04)  | 1.61<br>(0.12)  | -0.82<br>(2.38)  | -1.14<br>(2.42)  | -0.89<br>(2.59)  | 1.68<br>(1.84)  | 1.89<br>(1.86)  | 1.93<br>(1.91) | 0.96        | 0.96   | 0.96 | 0.96 (0.91-0.98)    | 0.96 (0.90-0.98)    | 0.95 (0.90-0.98)    |
| Left inferior parietal cortex         | 16.52<br>(2.04) | 16.51<br>(2.08) | 16.47<br>(1.98) | 16.53<br>(1.99) | 12.36                    | 12.62 | 12.04  | 12.04 | 0.30<br>(0.77)     | 0.99<br>(0.33)  | -0.14<br>(0.89) | -0.15<br>(1.93)  | -0.28<br>(1.58)  | 0.10<br>(1.93)   | 1.50<br>(1.19)  | 1.22<br>(1.00)  | 1.38<br>(1.32) | 0.99        | 0.99   | 0.99 | 0.99 (0.97-0.99)    | 0.99 (0.98-1.00)    | 0.99 (0.97-0.99)    |
| Left inferior temporal gyrus          | 13.44<br>(1.94) | 13.39<br>(2.00) | 13.41<br>(1.93) | 13.28<br>(1.85) | 14.45                    | 14.94 | 14.40  | 13.89 | 1.03<br>(0.31)     | 0.53<br>(0.60)  | 2.70<br>(0.01)  | -0.45<br>(2.08)  | -0.18<br>(1.74)  | -1.09<br>(2.27)  | 1.38<br>(1.60)  | 1.39<br>(1.03)  | 2.11<br>(1.32) | 0.99        | 0.99   | 0.99 | 0.99 (0.98-1.00)    | 0.99 (0.98-1.00)    | 0.99 (0.96-0.99)    |
| Left isthmus cingulate cortex         | 3.34<br>(0.63)  | 3.35<br>(0.64)  | 3.36<br>(0.63)  | 3.35<br>(0.65)  | 18.81                    | 18.95 | 18.77  | 19.45 | -0.55<br>(0.59)    | -0.92<br>(0.37) | -0.22<br>(0.83) | 0.27<br>(3.21)   | 0.44<br>(2.55)   | 0.04<br>(3.09)   | 2.58<br>(1.86)  | 2.06<br>(1.51)  | 2.32<br>(1.99) | 0.99        | 0.99   | 0.99 | 0.99 (0.97-0.99)    | 0.99 (0.98-1.00)    | 0.99 (0.97-0.99)    |
| Left lateral occipital cortex         | 15.90<br>(2.16) | 15.83<br>(2.24) | 15.91<br>(2.14) | 15.92<br>(2.23) | 13.58                    | 14.14 | 13.48  | 14.02 | 1.40<br>(0.17)     | -0.08<br>(0.94) | -0.36<br>(0.72) | -0.52<br>(1.71)  | 0.04<br>(1.50)   | 0.06<br>(1.64)   | 1.37<br>(1.12)  | 1.22<br>(0.83)  | 1.30<br>(0.97) | 0.99        | 0.99   | 0.99 | 0.99 (0.98-1.00)    | 0.99 (0.99-1.00)    | 0.99 (0.98-1.00)    |
| Left lateral orbitofrontal cortex     | 9.49<br>(0.91)  | 9.45<br>(0.92)  | 9.40<br>(0.93)  | 9.49<br>(0.97)  | 9.61                     | 9.75  | 9.92   | 10.23 | 0.96<br>(0.35)     | 1.92<br>(0.07)  | -0.23<br>(0.82) | -0.42<br>(2.12)  | -0.94<br>(2.41)  | 0.01<br>(1.45)   | 1.81<br>(1.12)  | 2.11<br>(1.44)  | 1.08<br>(0.95) | 0.98        | 0.97   | 0.99 | 0.98 (0.95-0.99)    | 0.97 (0.92-0.99)    | 0.99 (0.98-1.00)    |
| Left lingual gyrus                    | 8.59<br>(1.19)  | 8.57<br>(1.15)  | 8.61<br>(1.21)  | 8.63<br>(1.21)  | 13.83                    | 13.38 | 14.08  | 13.96 | 0.36<br>(0.72)     | -0.53<br>(0.60) | -1.20<br>(0.24) | -0.09<br>(1.81)  | 0.21<br>(2.16)   | 0.51<br>(2.10)   | 1.37<br>(1.15)  | 1.49<br>(1.55)  | 1.37<br>(1.65) | 0.99        | 0.99   | 0.99 | 0.99 (0.98-1.00)    | 0.99 (0.97-0.99)    | 0.99 (0.97-0.99)    |
| Left medial orbitofrontal cortex      | 6.12<br>(0.67)  | 6.35<br>(0.81)  | 6.21<br>(0.79)  | 6.26<br>(0.88)  | 11.02                    | 12.74 | 12.72  | 14.05 | -3.52<br>(0.00)    | -1.20<br>(0.24) | -1.51<br>(0.14) | 3.45<br>(5.19)   | 1.19<br>(5.90)   | 1.87<br>(7.18)   | 5.00<br>(3.65)  | 4.27            |                |             |        |      |                     |                     |                     |

|                                        |                 |                 |                 |                 |       |       |       |       |                 |                 |                 |                 |                   |                 |                |                  |                |      |      |      |                  |                   |                  |
|----------------------------------------|-----------------|-----------------|-----------------|-----------------|-------|-------|-------|-------|-----------------|-----------------|-----------------|-----------------|-------------------|-----------------|----------------|------------------|----------------|------|------|------|------------------|-------------------|------------------|
| Left middle temporal gyrus             | 13.86<br>(1.51) | 13.83<br>(1.47) | 13.70<br>(1.40) | 13.31<br>(1.52) | 10.88 | 10.65 | 10.19 | 11.39 | 0.40<br>(0.69)  | 2.58<br>(0.02)  | 4.77<br>(0.00)  | -0.16<br>(2.19) | -1.09<br>(2.08)   | -4.10<br>(4.39) | 1.82<br>(1.16) | 1.73<br>(1.56)   | 5.00<br>(3.28) | 0.98 | 0.98 | 0.93 | 0.98 (0.95-0.99) | 0.97 (0.93-0.99)  | 0.87 (0.40-0.96) |
| Left parahippocampal gyrus             | 2.47<br>(0.32)  | 2.50<br>(0.34)  | 2.48<br>(0.34)  | 2.51<br>(0.33)  | 12.95 | 13.59 | 13.61 | 13.19 | -1.21<br>(0.24) | -0.38<br>(0.71) | -1.75<br>(0.09) | 0.95<br>(4.04)  | 0.30<br>(4.55)    | 1.48<br>(4.01)  | 3.20<br>(2.56) | 3.54<br>(2.78)   | 3.50<br>(2.37) | 0.95 | 0.94 | 0.95 | 0.95 (0.88-0.98) | 0.94 (0.87-0.97)  | 0.94 (0.87-0.97) |
| Left paracentral lobule                | 4.29<br>(0.57)  | 4.28<br>(0.58)  | 4.30<br>(0.56)  | 4.30<br>(0.57)  | 13.23 | 13.48 | 13.08 | 13.29 | 0.22<br>(0.83)  | -0.62<br>(0.54) | -0.77<br>(0.45) | -0.15<br>(2.50) | 0.33<br>(2.45)    | 0.39<br>(2.57)  | 1.97<br>(1.49) | 2.08<br>(1.27)   | 2.03<br>(1.58) | 0.98 | 0.98 | 0.98 | 0.98 (0.96-0.99) | 0.98 (0.96-0.99)  | 0.98 (0.96-0.99) |
| Left pars opercularis                  | 6.13<br>(0.74)  | 6.11<br>(0.74)  | 6.09<br>(0.76)  | 6.12<br>(0.73)  | 12.15 | 12.18 | 12.46 | 11.88 | 0.54<br>(0.60)  | 1.31<br>(0.20)  | 0.21<br>(0.84)  | -0.30<br>(2.78) | -0.66<br>(2.35)   | -0.10<br>(3.07) | 2.18<br>(1.70) | 2.02<br>(1.31)   | 1.97<br>(2.33) | 0.97 | 0.98 | 0.96 | 0.98 (0.94-0.99) | 0.98 (0.96-0.99)  | 0.96 (0.92-0.98) |
| Left pars orbitalis                    | 3.19<br>(0.41)  | 3.17<br>(0.45)  | 3.20<br>(0.42)  | 3.11<br>(0.44)  | 12.93 | 14.07 | 13.14 | 14.27 | 1.03<br>(0.31)  | -0.34<br>(0.74) | 3.19<br>(0.00)  | -1.00<br>(4.29) | 0.23<br>(3.57)    | -2.80<br>(4.23) | 3.60<br>(2.44) | 2.89<br>(2.02)   | 4.11<br>(2.91) | 0.95 | 0.96 | 0.96 | 0.95 (0.90-0.98) | 0.96 (0.92-0.98)  | 0.94 (0.80-0.98) |
| Left pars triangularis                 | 4.71<br>(0.74)  | 4.73<br>(0.74)  | 4.72<br>(0.72)  | 4.60<br>(0.75)  | 15.73 | 15.65 | 15.14 | 16.30 | -0.86<br>(0.40) | -0.58<br>(0.57) | 2.04<br>(0.05)  | 0.67<br>(3.69)  | 0.48<br>(3.35)    | -2.31<br>(5.69) | 2.92<br>(2.28) | 2.57<br>(2.15)   | 4.55<br>(4.04) | 0.98 | 0.98 | 0.94 | 0.98 (0.95-0.99) | 0.98 (0.96-0.99)  | 0.94 (0.85-0.97) |
| Left pericalcarine cortex              | 2.66<br>(0.49)  | 2.66<br>(0.49)  | 2.66<br>(0.50)  | 2.67<br>(0.49)  | 18.30 | 18.29 | 18.76 | 18.40 | -0.08<br>(0.94) | -0.16<br>(0.88) | -0.54<br>(0.60) | 0.03<br>(2.41)  | -0.03<br>(1.92)   | 0.30<br>(3.58)  | 1.95<br>(1.36) | 1.42<br>(1.26)   | 2.80<br>(2.19) | 0.99 | 0.99 | 0.98 | 0.99 (0.98-1.00) | 0.99 (0.99-1.00)  | 0.98 (0.96-0.99) |
| Left postcentral gyrus                 | 12.09<br>(1.38) | 12.07<br>(1.37) | 12.10<br>(1.38) | 12.10<br>(1.43) | 11.38 | 11.37 | 11.37 | 11.79 | 0.47<br>(0.64)  | -0.34<br>(0.74) | -0.23<br>(0.82) | -0.11<br>(1.36) | 0.12<br>(1.65)    | 0.03<br>(1.68)  | 0.95<br>(0.96) | 1.30<br>(0.99)   | 1.32<br>(1.01) | 0.99 | 0.99 | 0.99 | 0.99 (0.99-1.00) | 0.99 (0.98-1.00)  | 0.99 (0.98-1.00) |
| Left posterior cingulate cortex        | 3.89<br>(0.69)  | 3.89<br>(0.69)  | 3.91<br>(0.70)  | 3.91<br>(0.71)  | 17.78 | 17.81 | 17.95 | 18.23 | -0.14<br>(0.89) | -0.58<br>(0.56) | -0.95<br>(0.35) | 0.07<br>(2.48)  | 0.36<br>(3.03)    | 0.50<br>(2.69)  | 2.04<br>(1.35) | 2.36<br>(1.87)   | 2.16<br>(1.63) | 0.99 | 0.98 | 0.99 | 0.99 (0.98-1.00) | 0.98 (0.97-0.99)  | 0.99 (0.97-0.99) |
| Left precentral gyrus                  | 15.50<br>(1.48) | 15.45<br>(1.52) | 15.47<br>(1.49) | 15.46<br>(1.55) | 9.55  | 9.82  | 9.64  | 10.06 | 1.36<br>(0.19)  | 0.71<br>(0.48)  | 1.01<br>(0.32)  | -0.35<br>(1.16) | -0.18<br>(1.23)   | -0.32<br>(1.38) | 1.00<br>(0.66) | 0.95<br>(0.77)   | 1.15<br>(0.80) | 0.99 | 0.99 | 0.99 | 0.99 (0.98-1.00) | 0.99 (0.98-1.00)  | 0.99 (0.98-1.00) |
| Left precuneus                         | 12.93<br>(1.62) | 12.91<br>(1.59) | 12.90<br>(1.62) | 12.96<br>(1.58) | 12.53 | 12.31 | 12.52 | 12.21 | 0.64<br>(0.53)  | 0.95<br>(0.35)  | -0.85<br>(0.41) | -0.11<br>(1.12) | -0.23<br>(1.28)   | 0.27<br>(1.39)  | 0.81<br>(0.76) | 1.12<br>(0.62)   | 1.17<br>(0.76) | 1.00 | 1.00 | 0.99 | 1.00 (0.99-1.00) | 1.00 (0.99-1.00)  | 0.99 (0.99-1.00) |
| Left rostral anterior cingulate cortex | 3.18<br>(0.55)  | 3.19<br>(0.58)  | 3.24<br>(0.59)  | 3.18<br>(0.54)  | 17.34 | 18.22 | 18.21 | 16.99 | -0.38<br>(0.71) | -2.47<br>(0.02) | -0.21<br>(0.84) | 0.17<br>(4.50)  | 1.71<br>(3.96)    | 0.19<br>(4.07)  | 3.52<br>(2.72) | 3.77<br>(1.98)   | 3.25<br>(2.37) | 0.97 | 0.98 | 0.98 | 0.97 (0.93-0.99) | 0.97 (0.93-0.99)  | 0.98 (0.95-0.99) |
| Left rostral middle frontal gyrus      | 20.88<br>(2.94) | 20.94<br>(3.03) | 20.70<br>(2.83) | 20.51<br>(2.82) | 14.09 | 14.46 | 13.65 | 13.74 | -0.76<br>(0.45) | 1.70<br>(0.10)  | 3.73<br>(0.00)  | 0.24<br>(1.94)  | -0.80<br>(2.47)   | -1.72<br>(2.35) | 1.54<br>(1.16) | 2.00<br>(1.62)   | 2.25<br>(1.83) | 0.99 | 0.98 | 0.99 | 0.99 (0.98-1.00) | 0.98 (0.96-0.99)  | 0.98 (0.91-0.99) |
| Left superior frontal gyrus            | 28.06<br>(3.45) | 28.01<br>(3.45) | 27.78<br>(3.59) | 28.13<br>(3.59) | 12.30 | 12.31 | 12.93 | 12.76 | 0.61<br>(0.55)  | 2.54<br>(0.02)  | -0.80<br>(0.43) | -0.17<br>(1.51) | -1.07<br>(2.01)   | 0.22<br>(1.55)  | 1.19<br>(0.92) | 1.64<br>(1.55)   | 1.13<br>(1.05) | 0.99 | 0.99 | 0.99 | 0.99 (0.98-1.00) | 0.99 (0.96-0.99)  | 0.99 (0.98-1.00) |
| Left superior parietal cortex          | 18.05<br>(2.33) | 17.96<br>(2.40) | 18.09<br>(2.39) | 18.02<br>(2.35) | 12.89 | 13.35 | 13.20 | 13.07 | 1.94<br>(0.06)  | -0.62<br>(0.54) | 0.66<br>(0.51)  | -0.58<br>(1.42) | 0.18<br>(1.73)    | -0.24<br>(1.59) | 1.10<br>(1.05) | 1.40<br>(1.00)   | 1.27<br>(0.94) | 1.00 | 0.99 | 0.99 | 0.99 (0.99-1.00) | 0.99 (0.98-1.00)  | 0.99 (0.98-1.00) |
| Left superior temporal gyrus           | 15.21<br>(1.98) | 15.23<br>(1.93) | 15.20<br>(1.93) | 15.20<br>(1.86) | 13.03 | 12.65 | 12.70 | 12.21 | -0.39<br>(0.70) | 0.22<br>(0.83)  | 0.14<br>(0.89)  | 0.19<br>(1.98)  | -0.03<br>(1.60)   | 0.03<br>(2.36)  | 1.46<br>(1.32) | 1.18<br>(1.06)   | 1.84<br>(1.42) | 0.99 | 0.99 | 0.98 | 0.99 (0.97-0.99) | 0.99 (0.98-1.00)  | 0.98 (0.96-0.99) |
| Left supramarginal gyrus               | 15.45<br>(2.95) | 15.40<br>(2.98) | 15.49<br>(3.02) | 15.52<br>(3.09) | 19.13 | 19.32 | 19.49 | 19.91 | 0.69<br>(0.49)  | -0.74<br>(0.47) | -1.17<br>(0.25) | -0.27<br>(1.96) | 0.21<br>(1.71)    | 0.33<br>(1.90)  | 1.59<br>(1.14) | 1.23<br>(1.18)   | 1.48<br>(1.20) | 0.99 | 1.00 | 1.00 | 0.99 (0.99-1.00) | 1.00 (0.99-1.00)  | 0.99 (0.99-1.00) |
| Left frontal pole                      | 1.34<br>(0.20)  | 1.30<br>(0.18)  | 1.13<br>(0.23)  | 1.31<br>(0.20)  | 14.95 | 13.62 | 20.18 | 15.32 | 1.66<br>(0.11)  | 4.67<br>(0.00)  | 1.53<br>(0.14)  | -2.80<br>(9.76) | -17.47<br>(21.22) | -2.24<br>(7.38) | 7.51<br>(6.68) | 18.33<br>(20.45) | 5.67<br>(5.12) | 0.81 | 0.49 | 0.88 | 0.79 (0.58-0.90) | 0.34 (-0.07-0.65) | 0.88 (0.75-0.94) |
| Left temporal pole                     | 2.78<br>(0.54)  | 2.84<br>(0.47)  | 2.85<br>(0.50)  | 2.83<br>(0.46)  | 19.51 | 16.55 | 17.72 | 16.18 | -1.22<br>(0.24) | -1.81<br>(0.08) | -1.12<br>(0.27) | 2.43<br>(8.89)  | 2.55<br>(7.10)    | 2.31<br>(8.22)  | 5.81<br>(7.07) | 5.21<br>(5.38)   | 6.08<br>(5.89) | 0.91 | 0.95 | 0.92 | 0.90 (0.79-0.95) | 0.94 (0.87-0.97)  | 0.91 (0.80-0.96) |
| Left transverse temporal gyrus         | 1.51<br>(0.31)  | 1.52<br>(0.32)  | 1.52<br>(0.30)  | 1.53<br>(0.34)  | 20.70 | 21.32 | 19.55 | 21.93 | -0.83<br>(0.42) | -1.09<br>(0.29) | -1.60<br>(0.12) | 0.53<br>(3.75)  | 0.91<br>(3.36)    | 1.00<br>(3.68)  | 2.79<br>(2.50) | 2.89<br>(1.86)   | 3.04<br>(2.22) | 0.98 | 0.99 | 0.99 | 0.98 (0.96-0.99) | 0.99 (0.97-0.99)  | 0.98 (0.96-0.99) |
| Left insula                            | 8.09<br>(0.87)  | 8.00<br>(0.81)  | 8.09<br>(0.85)  | 8.14<br>(0.86)  | 10.77 | 10.15 | 10.52 | 10.58 | 1.49<br>(0.15)  | 0.01<br>(0.99)  | -0.63<br>(0.53) | -1.05<br>(3.69) | 0.02<br>(4.24)    | 0.58<br>(4.38)  | 2.73<br>(2.65) | 3.13<br>(2.78)   | 3.38<br>(2.76) | 0.94 | 0.92 | 0.92 | 0.93 (0.85-0.97) | 0.92 (0.83-0.96)  | 0.92 (0.82-0.96) |
| Right banks superior temporal sulcus   | 2.68<br>(0.42)  | 2.66<br>(0.46)  | 2.69<br>(0.44)  | 2.65<br>(0.42)  | 15.61 | 17.44 | 16.53 | 15.81 | 0.44<br>(0.66)  | -0.37<br>(0.71) | 0.92<br>(0.37)  | -0.75<br>(5.11) | 0.20<br>(4.25)    | -0.94<br>(4.87) | 4.08<br>(3.06) | 3.20<br>(2.73)   | 3.99<br>(2.84) | 0.95 | 0.96 | 0.95 | 0.94 (0.88-0.97) | 0.96 (0.91-0.98)  | 0.95 (0.89-0.98) |
| Right caudal anterior cingulate cortex | 2.39<br>(0.50)  | 2.39<br>(0.50)  | 2.40<br>(0.50)  | 2.39<br>(0.51)  | 20.85 | 20.93 | 20.68 | 21.28 | -0.39<br>(0.70) | -1.18<br>(0.25) | -0.57<br>(0.57) | 0.23<br>(3.46)  | 0.79<br>(2.94)    | 0.22<br>(2.70)  | 2.48<br>(2.37) | 2.49<br>(1.68)   | 1.95<br>(1.83) | 0.99 | 0.99 | 0.99 | 0.99 (0.97-0.99) | 0.99 (0.97-0.99)  | 0.99 (0.98-1.00) |
| Right caudal middle frontal gyrus      | 8.11<br>(1.03)  | 8.00<br>(1.00)  | 8.09<br>(1.06)  | 8.17<br>(1.06)  | 12.70 | 12.50 | 13.09 | 12.97 | 0.75<br>(0.46)  | 0.53<br>(0.60)  | -1.60<br>(0.12) | -1.23<br>(8.50) | -0.27<br>(2.13)   | 0.75<br>(2.43)  | 3.32<br>(7.90) | 1.58<br>(1.42)   | 1.85<br>(1.71) | 0.77 | 0.99 | 0.98 | 0.78 (0.56-0.89) | 0.99 (0.97-0.99)  | 0.98 (0.96-0.99) |
| Right cuneus                           | 4.59<br>(1.04)  | 4.60<br>(1.03)  | 4.59<br>(1.02)  | 4.59<br>(1.07)  | 22.60 | 22.49 | 22.28 | 23.22 | -0.28<br>(0.78) | 0.20<br>(0.85)  | 0.02<br>(0.98)  | 0.16<br>(2.48)  | -0.02<br>(2.18)   | -0.13<br>(2.50) | 1.95<br>(1.49) | 1.73<br>(1.28)   | 1.97<br>(1.49) | 0.99 | 1.00 | 0.99 | 0.99 (0.98-1.00) | 1.00 (0.99-1.00)  | 0.99 (0.99-1.00) |
| Right entorhinal cortex                | 2.09<br>(0.32)  | 2.12<br>(0.34)  | 2.16<br>(0.31)  | 2.16<br>(0.32)  | 15.37 | 16.18 | 14.45 | 14.88 | -1.16<br>(0.26) | -1.59<br>(0.12) | -1.83<br>(0.08) | 1.52<br>(6.93)  | 3.20<br>(10.00)   | 3.44<br>(9.87)  | 5.27<br>(4.63) | 7.12<br>(7.60)   | 7.24<br>(7.43) | 0.91 | 0.80 | 0.81 | 0.91 (0.80-0.96) | 0.79 (0.58-0.90)  | 0.80 (0.60-0.91) |
| Right fusiform gyrus                   | 11.33<br>(1.43) | 11.31<br>(1.51) | 11.29<br>(1.46) | 11.29<br>(1.49) | 12.65 | 13.38 | 12.90 | 13.16 | 0.40<br>(0.69)  | 0.75<br>(0.46)  | 1.04<br>(0.31)  | -0.26<br>(2.24) | -0.44<br>(2.84)   | -0.45<br>(1.90) | 1.79<br>(1.31) | 1.87<br>(2.15)   | 1.58<br>(1.11) | 0.99 | 0.98 | 0.99 | 0.98 (0.97-0.99) | 0.98 (0.95-0.99)  | 0.99 (0.98-1.00) |
| Right inferior parietal cortex         | 20.01<br>(3.05) | 20.08<br>(3.07) | 20.11<br>(3.08) | 20.14<br>(3.05) | 15.22 | 15.26 | 15.32 | 15.14 | -0.64<br>(0.53) | -1.31<br>(0.20) | -1.49<br>(0.15) | 0.36<br>(2.62)  | 0.49<br>(1.83)    | 0.64<br>(2.06)  | 1.74<br>(1.95) | 1.27<br>(1.40)   | 1.64<br>(1.37) | 0.98 | 0.99 | 0.99 | 0.98 (0.97-0.99) | 0.99 (0.98-1.00)  | 0.99 (0.98-1.00) |
| Right inferior temporal gyrus          | 12.39<br>(1.97) | 12.46<br>(1.95) | 12.45<br>(1.94) | 12.43<br>(1.95) | 15.92 | 15.63 | 15.60 | 15.65 | -1.34<br>(0.19) | -1.30<br>(0.21) | -0.76<br>(0.45) | 0.58<br>(2.01)  | 0.49<br>(1.64)    | 0.38<br>(2.31)  | 1.72<br>(1.15) | 1.34<br>(1.03)   | 1.88<br>(1.33) | 0.99 | 0.99 | 0.99 | 0.99 (0.98-1.00) | 0.99 (0.99-1.00)  | 0.99 (0.98-1.00) |
| Right isthmus cingulate cortex         | 3.33<br>(0.63)  | 3.36<br>(0.63)  | 3.33<br>(0.62)  | 3.33<br>(0.64)  | 18.82 | 18.64 | 18.55 | 19.09 | -1.76<br>(0.09) | -0.14<br>(0.89) | -0.06<br>(0.95) | 0.79<br>(2.50)  | 0.08<br>(2.54)    | -0.02<br>(2.53) | 1.99<br>(1.66) | 1.92<br>(1.62)   | 1.92<br>(1.59) | 0.99 | 0.99 | 0.99 | 0.99 (0.98-1.00) | 0.99 (0.98-1.00)  | 0.99 (0.98-1.00) |
| Right lateral occipital cortex         | 16.05<br>(2.09) | 16.10<br>(2.21) | 16.11<br>(2.14) | 16.11<br>(2.15) | 13.04 | 13.75 | 13.27 | 13.36 | -0.60<br>(0.56) | -1.35<br>(0.19) | -1.03<br>(0.32) | 0.19<br>(1.94)  | 0.36<br>(1.26)    | 0.30<br>(1.55)  | 1.36<br>(1.37) | 1.00<br>(0.81)   | 1.18<br>(1.02) | 0.99 | 0.99 | 0.99 | 0.99 (0.97-0.99) | 0.99 (0.99-1.00)  | 0.99 (0.98-1.00) |
| Right lateral orbitofrontal cortex     | 9.25<br>(1.21)  | 9.18<br>(1.05)  | 9.10<br>(1.07)  | 9.06<br>(1.06)  | 13.07 | 11.42 | 11.71 | 11.71 | 0.73<br>(0.47)  | 1.60<br>(0.12)  | 2.70<br>(0.01)  | -0.57<br>(4.84) | -1.54<br>(4.87)   | -1.98<br>(3.62) | 3.95<br>(2.75) | 3.89<br>(3.22)   | 3.32<br>(2.38) | 0.92 | 0.92 | 0.96 | 0.91 (0.81-0.96) | 0.91 (0.80-0.96)  | 0.94 (0.83-0.97) |
| Right lingual gyrus                    | 9.13<br>(1.58)  | 9.14<br>(1.59)  | 9.11<br>(1.56)  | 9.10<br>(1.56)  | 17.34 | 17.34 | 17.17 | 17.09 | -0.47<br>(0.64) | 0.82<br>(0.42)  | 0.95<br>(0.35)  | 0.12<br>(1.36)  | -0.20<br>(1.25)   | -0.25<br>(1.37) | 1.14<br>(0.73) | 1.06<br>(0.67)   | 1.10<br>(0.83) | 1.00 | 1.00 | 1.00 | 1.00 (0.99-1.00) | 1.00              |                  |



|                                         |                 |                 |                 |                 |       |       |       |       |                 |                 |                 |                 |                   |                  |                |                  |                |      |      |      |                      |                       |                      |
|-----------------------------------------|-----------------|-----------------|-----------------|-----------------|-------|-------|-------|-------|-----------------|-----------------|-----------------|-----------------|-------------------|------------------|----------------|------------------|----------------|------|------|------|----------------------|-----------------------|----------------------|
| Right pericalcarine cortex              | 2.92<br>(0.48)  | 2.94<br>(0.49)  | 2.91<br>(0.47)  | 2.92<br>(0.48)  | 16.27 | 16.82 | 16.08 | 16.38 | -0.78<br>(0.44) | 0.99<br>(0.33)  | 0.13<br>(0.90)  | 0.34<br>(2.71)  | -0.45<br>(2.49)   | -0.12<br>(3.40)  | 2.29<br>(1.42) | 2.01<br>(1.48)   | 2.57<br>(2.17) | 0.99 | 0.99 | 0.98 | 0.99 (0.97-<br>0.99) | 0.99 (0.98-<br>1.00)  | 0.98 (0.95-<br>0.99) |
| Right postcentral gyrus                 | 11.30<br>(1.33) | 11.45<br>(1.20) | 11.31<br>(1.30) | 11.24<br>(1.50) | 11.81 | 10.47 | 11.45 | 13.35 | -1.47<br>(0.16) | -0.18<br>(0.86) | 0.72<br>(0.48)  | 1.50<br>(5.22)  | 0.12<br>(1.85)    | -0.76<br>(4.68)  | 2.21<br>(4.95) | 1.52<br>(1.01)   | 2.29<br>(4.12) | 0.92 | 0.99 | 0.97 | 0.91 (0.81-<br>0.96) | 0.99 (0.97-<br>0.99)  | 0.96 (0.92-<br>0.98) |
| Right posterior cingulate cortex        | 4.11<br>(0.72)  | 4.09<br>(0.70)  | 4.11<br>(0.70)  | 4.11<br>(0.70)  | 17.49 | 17.17 | 16.93 | 17.10 | 0.76<br>(0.45)  | 0.13<br>(0.90)  | 0.17<br>(0.86)  | -0.47<br>(3.38) | 0.02<br>(2.56)    | -0.02<br>(3.11)  | 2.13<br>(2.63) | 1.89<br>(1.68)   | 2.36<br>(1.95) | 0.98 | 0.99 | 0.99 | 0.98 (0.95-<br>0.99) | 0.99 (0.97-<br>0.99)  | 0.99 (0.97-<br>0.99) |
| Right precentral gyrus                  | 15.61<br>(1.46) | 15.42<br>(1.32) | 15.45<br>(1.29) | 15.45<br>(1.33) | 9.38  | 8.55  | 8.37  | 8.58  | 1.60<br>(0.12)  | 1.49<br>(0.15)  | 1.16<br>(0.26)  | -1.17<br>(3.75) | -0.93<br>(3.23)   | -0.96<br>(4.28)  | 1.99<br>(3.37) | 1.73<br>(2.87)   | 2.01<br>(3.88) | 0.91 | 0.93 | 0.88 | 0.90 (0.78-<br>0.95) | 0.92 (0.83-<br>0.97)  | 0.88 (0.74-<br>0.94) |
| Right precuneus                         | 13.64<br>(1.64) | 13.60<br>(1.62) | 13.62<br>(1.64) | 13.61<br>(1.54) | 11.99 | 11.92 | 12.06 | 11.35 | 0.49<br>(0.63)  | 0.32<br>(0.75)  | 0.33<br>(0.74)  | -0.26<br>(2.91) | -0.11<br>(1.72)   | -0.10<br>(2.59)  | 1.59<br>(2.43) | 1.28<br>(1.12)   | 1.79<br>(1.84) | 0.97 | 0.99 | 0.98 | 0.97 (0.94-<br>0.99) | 0.99 (0.98-<br>1.00)  | 0.98 (0.95-<br>0.99) |
| Right rostral anterior cingulate cortex | 2.55<br>(0.53)  | 2.51<br>(0.52)  | 2.55<br>(0.57)  | 2.59<br>(0.55)  | 20.62 | 20.85 | 22.24 | 21.15 | 2.60<br>(0.02)  | 0.32<br>(0.75)  | -1.52<br>(0.14) | -1.88<br>(3.54) | -0.65<br>(4.03)   | 1.30<br>(5.08)   | 3.09<br>(2.50) | 3.08<br>(2.60)   | 4.13<br>(3.12) | 0.99 | 0.99 | 0.98 | 0.98 (0.95-<br>0.99) | 0.99 (0.97-<br>0.99)  | 0.97 (0.94-<br>0.99) |
| Right rostral middle frontal gyrus      | 21.69<br>(2.64) | 21.64<br>(2.61) | 21.40<br>(2.46) | 21.49<br>(2.58) | 12.16 | 12.05 | 11.50 | 12.01 | 0.50<br>(0.62)  | 2.05<br>(0.05)  | 1.90<br>(0.07)  | -0.21<br>(2.35) | -1.27<br>(3.26)   | -0.89<br>(2.38)  | 1.62<br>(1.68) | 2.67<br>(2.21)   | 1.98<br>(1.55) | 0.98 | 0.96 | 0.98 | 0.98 (0.96-<br>0.99) | 0.96 (0.90-<br>0.98)  | 0.98 (0.95-<br>0.99) |
| Right superior frontal gyrus            | 28.07<br>(3.46) | 27.94<br>(3.51) | 27.92<br>(3.59) | 28.18<br>(3.47) | 12.34 | 12.55 | 12.87 | 12.31 | 0.38<br>(0.70)  | 0.89<br>(0.38)  | -0.66<br>(0.52) | -0.45<br>(5.60) | -0.59<br>(2.92)   | 0.40<br>(2.93)   | 2.52<br>(4.99) | 1.90<br>(2.26)   | 1.68<br>(2.41) | 0.89 | 0.97 | 0.97 | 0.90 (0.78-<br>0.95) | 0.97 (0.94-<br>0.99)  | 0.97 (0.93-<br>0.99) |
| Right superior parietal cortex          | 17.42<br>(2.52) | 17.58<br>(2.42) | 17.45<br>(2.43) | 17.46<br>(2.46) | 14.47 | 13.76 | 13.94 | 14.10 | -1.00<br>(0.33) | -0.50<br>(0.62) | -0.35<br>(0.73) | 0.97<br>(4.65)  | 0.22<br>(1.36)    | 0.25<br>(2.83)   | 1.97<br>(4.31) | 1.04<br>(0.89)   | 1.86<br>(2.11) | 0.95 | 1.00 | 0.98 | 0.95 (0.89-<br>0.98) | 1.00 (0.99-<br>1.00)  | 0.98 (0.96-<br>0.99) |
| Right superior temporal gyrus           | 14.49<br>(1.69) | 14.48<br>(1.59) | 14.34<br>(1.50) | 14.44<br>(1.52) | 11.63 | 11.01 | 10.45 | 10.53 | 0.42<br>(0.67)  | 2.40<br>(0.02)  | 0.93<br>(0.36)  | -0.05<br>(1.50) | -0.97<br>(2.12)   | -0.29<br>(2.00)  | 1.21<br>(0.86) | 1.72<br>(1.54)   | 1.44<br>(1.39) | 0.99 | 0.99 | 0.99 | 0.99 (0.98-<br>1.00) | 0.98 (0.94-<br>0.99)  | 0.98 (0.96-<br>0.99) |
| Right supramarginal gyrus               | 13.40<br>(2.42) | 13.49<br>(2.36) | 13.35<br>(2.35) | 13.38<br>(2.43) | 18.06 | 17.52 | 17.57 | 18.17 | -0.63<br>(0.54) | 0.92<br>(0.37)  | 0.35<br>(0.73)  | 0.73<br>(5.64)  | -0.27<br>(1.81)   | -0.13<br>(1.63)  | 2.39<br>(5.14) | 1.45<br>(1.08)   | 1.28<br>(0.99) | 0.95 | 1.00 | 1.00 | 0.96 (0.90-<br>0.98) | 0.99 (0.99-<br>1.00)  | 1.00 (0.99-<br>1.00) |
| Right frontal pole                      | 1.54<br>(0.21)  | 1.58<br>(0.27)  | 1.29<br>(0.22)  | 1.52<br>(0.22)  | 13.86 | 16.85 | 17.09 | 14.41 | -1.27<br>(0.22) | 5.03<br>(0.00)  | 0.96<br>(0.34)  | 2.04<br>(9.91)  | -18.09<br>(17.87) | -1.77<br>(9.16)  | 7.44<br>(6.70) | 20.10<br>(15.48) | 7.78<br>(4.91) | 0.81 | 0.34 | 0.79 | 0.79 (0.59-<br>0.90) | 0.21 (-0.10-<br>0.52) | 0.80 (0.59-<br>0.90) |
| Right temporal pole                     | 2.72<br>(0.40)  | 2.69<br>(0.43)  | 2.71<br>(0.49)  | 2.64<br>(0.50)  | 14.87 | 15.90 | 18.22 | 18.93 | 0.83<br>(0.41)  | 0.13<br>(0.90)  | 1.40<br>(0.17)  | -1.20<br>(6.18) | -0.83<br>(8.14)   | -3.86<br>(11.97) | 4.55<br>(4.25) | 6.37<br>(4.97)   | 9.05<br>(8.58) | 0.93 | 0.92 | 0.81 | 0.93 (0.84-<br>0.97) | 0.91 (0.80-<br>0.96)  | 0.78 (0.57-<br>0.90) |
| Right transverse temporal gyrus         | 1.35<br>(0.28)  | 1.35<br>(0.26)  | 1.34<br>(0.27)  | 1.34<br>(0.28)  | 20.52 | 19.54 | 19.81 | 20.71 | 0.09<br>(0.93)  | 0.67<br>(0.51)  | 1.18<br>(0.25)  | 0.07<br>(4.63)  | -0.48<br>(4.88)   | -0.76<br>(3.45)  | 3.79<br>(2.56) | 3.90<br>(2.87)   | 2.49<br>(2.46) | 0.98 | 0.98 | 0.99 | 0.98 (0.94-<br>0.99) | 0.98 (0.94-<br>0.99)  | 0.99 (0.97-<br>0.99) |
| Right insula                            | 7.81<br>(0.77)  | 7.94<br>(0.90)  | 7.99<br>(0.96)  | 8.06<br>(0.79)  | 9.85  | 11.34 | 12.02 | 9.74  | -1.67<br>(0.11) | -2.08<br>(0.05) | -2.93<br>(0.01) | 1.58<br>(5.01)  | 2.09<br>(5.00)    | 3.18<br>(5.36)   | 3.45<br>(3.92) | 3.42<br>(4.16)   | 4.36<br>(4.41) | 0.89 | 0.90 | 0.85 | 0.87 (0.73-<br>0.94) | 0.86 (0.69-<br>0.94)  | 0.81 (0.54-<br>0.92) |
| <b>Local cortical surface (cm²)</b>     |                 |                 |                 |                 |       |       |       |       |                 |                 |                 |                 |                   |                  |                |                  |                |      |      |      |                      |                       |                      |
| Left banks superior temporal sulcus     | 10.77<br>(1.29) | 10.84<br>(1.47) | 10.78<br>(1.32) | 10.67<br>(1.33) | 12.01 | 13.54 | 12.23 | 12.42 | -0.90<br>(0.38) | -0.24<br>(0.82) | 1.27<br>(0.22)  | 0.46<br>(3.71)  | 0.10<br>(3.10)    | -0.94<br>(3.47)  | 2.93<br>(2.25) | 2.60<br>(1.60)   | 3.15<br>(1.63) | 0.97 | 0.97 | 0.96 | 0.96 (0.91-<br>0.98) | 0.97 (0.93-<br>0.99)  | 0.96 (0.91-<br>0.98) |
| Left caudal anterior cingulate cortex   | 6.64<br>(1.28)  | 6.66<br>(1.35)  | 6.69<br>(1.29)  | 6.63<br>(1.26)  | 19.21 | 20.32 | 19.22 | 19.05 | -0.29<br>(0.78) | -0.78<br>(0.44) | 0.18<br>(0.86)  | -0.04<br>(3.74) | 0.65<br>(4.33)    | -0.13<br>(3.19)  | 2.97<br>(2.20) | 3.34<br>(2.75)   | 2.30<br>(2.17) | 0.99 | 0.97 | 0.99 | 0.98 (0.96-<br>0.99) | 0.97 (0.94-<br>0.99)  | 0.99 (0.97-<br>0.99) |
| Left caudal middle frontal gyrus        | 26.06<br>(4.29) | 26.02<br>(4.34) | 26.04<br>(4.39) | 26.27<br>(4.28) | 16.48 | 16.68 | 16.84 | 16.29 | 0.36<br>(0.72)  | 0.18<br>(0.86)  | -1.61<br>(0.12) | -0.20<br>(2.27) | -0.12<br>(2.16)   | 0.79<br>(2.41)   | 1.81<br>(1.33) | 1.64<br>(1.37)   | 1.80<br>(1.76) | 0.99 | 0.99 | 0.99 | 0.99 (0.98-<br>1.00) | 0.99 (0.98-<br>1.00)  | 0.99 (0.97-<br>0.99) |
| Left cuneus                             | 17.01<br>(2.22) | 16.98<br>(2.17) | 17.06<br>(2.14) | 16.98<br>(2.14) | 13.05 | 12.76 | 12.56 | 12.60 | 0.47<br>(0.64)  | -0.82<br>(0.42) | 0.48<br>(0.63)  | -0.16<br>(1.96) | 0.34<br>(1.75)    | -0.13<br>(1.92)  | 1.54<br>(1.19) | 1.41<br>(1.06)   | 1.43<br>(1.25) | 0.99 | 0.99 | 0.99 | 0.99 (0.97-<br>0.99) | 0.99 (0.98-<br>1.00)  | 0.99 (0.97-<br>0.99) |
| Left entorhinal cortex                  | 4.66<br>(0.92)  | 4.64<br>(0.93)  | 4.66<br>(0.97)  | 4.63<br>(1.04)  | 19.86 | 20.03 | 20.87 | 22.39 | 0.20<br>(0.84)  | -0.06<br>(0.96) | 0.32<br>(0.75)  | -0.42<br>(7.48) | -0.07<br>(5.95)   | -1.29<br>(9.72)  | 5.61<br>(4.83) | 4.70<br>(3.53)   | 7.50<br>(6.14) | 0.93 | 0.96 | 0.90 | 0.93 (0.85-<br>0.97) | 0.96 (0.90-<br>0.98)  | 0.90 (0.79-<br>0.95) |
| Left fusiform gyrus                     | 34.73<br>(2.99) | 34.52<br>(3.04) | 34.58<br>(3.18) | 34.49<br>(3.11) | 8.60  | 8.80  | 9.20  | 9.02  | 2.22<br>(0.04)  | 1.17<br>(0.25)  | 1.61<br>(0.12)  | -0.62<br>(1.38) | -0.46<br>(1.75)   | -0.72<br>(2.10)  | 1.07<br>(1.05) | 1.43<br>(1.07)   | 1.66<br>(1.44) | 0.99 | 0.98 | 0.97 | 0.99 (0.96-<br>0.99) | 0.98 (0.95-<br>0.99)  | 0.97 (0.93-<br>0.99) |
| Left inferior parietal cortex           | 50.56<br>(5.95) | 50.68<br>(5.89) | 50.35<br>(5.74) | 50.62<br>(5.62) | 11.76 | 11.63 | 11.39 | 11.11 | -0.80<br>(0.43) | 1.62<br>(0.12)  | -0.29<br>(0.77) | 0.25<br>(1.42)  | -0.39<br>(1.31)   | 0.19<br>(1.93)   | 1.13<br>(0.87) | 1.05<br>(0.85)   | 1.39<br>(1.33) | 0.99 | 0.99 | 0.99 | 0.99 (0.98-<br>1.00) | 0.99 (0.98-<br>1.00)  | 0.99 (0.97-<br>0.99) |
| Left inferior temporal gyrus            | 37.43<br>(4.86) | 37.29<br>(4.91) | 37.43<br>(4.95) | 37.52<br>(4.90) | 12.99 | 13.17 | 13.23 | 13.06 | 1.11<br>(0.28)  | -0.01<br>(0.99) | -0.77<br>(0.45) | -0.39<br>(1.67) | -0.03<br>(1.30)   | 0.23<br>(1.60)   | 1.23<br>(1.17) | 1.12<br>(0.63)   | 1.10<br>(1.16) | 0.99 | 1.00 | 0.99 | 0.99 (0.98-<br>1.00) | 1.00 (0.99-<br>1.00)  | 0.99 (0.99-<br>1.00) |
| Left isthmus cingulate cortex           | 11.16<br>(2.03) | 11.24<br>(2.06) | 11.27<br>(2.01) | 11.23<br>(2.05) | 18.17 | 18.35 | 17.82 | 18.30 | -1.03<br>(0.32) | -1.67<br>(0.11) | -0.96<br>(0.35) | 0.59<br>(3.19)  | 0.97<br>(2.67)    | 0.49<br>(3.00)   | 2.48<br>(2.03) | 2.41<br>(1.44)   | 2.12<br>(2.13) | 0.98 | 0.99 | 0.99 | 0.98 (0.97-<br>0.99) | 0.99 (0.97-<br>0.99)  | 0.99 (0.97-<br>0.99) |
| Left lateral occipital cortex           | 56.75<br>(7.50) | 56.75<br>(7.70) | 56.81<br>(7.58) | 57.01<br>(7.79) | 13.23 | 13.58 | 13.35 | 13.66 | -0.02<br>(0.98) | -0.35<br>(0.73) | -1.43<br>(0.17) | -0.03<br>(1.05) | 0.10<br>(1.42)    | 0.42<br>(1.52)   | 0.86<br>(0.57) | 1.09<br>(0.89)   | 1.16<br>(1.04) | 1.00 | 0.99 | 0.99 | 1.00 (0.99-<br>1.00) | 0.99 (0.98-<br>1.00)  | 0.99 (0.98-<br>1.00) |
| Left lateral orbitofrontal cortex       | 27.74<br>(3.01) | 27.67<br>(3.13) | 27.56<br>(3.11) | 27.82<br>(3.18) | 10.86 | 11.30 | 11.28 | 11.43 | 0.79<br>(0.44)  | 1.45<br>(0.16)  | -0.73<br>(0.47) | -0.33<br>(1.79) | -0.72<br>(2.30)   | 0.20<br>(1.82)   | 1.52<br>(0.96) | 2.04<br>(1.22)   | 1.48<br>(1.04) | 0.99 | 0.98 | 0.99 | 0.99 (0.97-<br>0.99) | 0.98 (0.95-<br>0.99)  | 0.99 (0.97-<br>0.99) |
| Left lingual gyrus                      | 33.36<br>(4.25) | 33.49<br>(4.45) | 33.56<br>(4.47) | 33.44<br>(4.42) | 12.74 | 13.30 | 13.33 | 13.22 | -1.16<br>(0.26) | -1.62<br>(0.12) | -0.62<br>(0.54) | 0.33<br>(1.67)  | 0.55<br>(1.80)    | 0.21<br>(1.98)   | 1.19<br>(1.19) | 1.25<br>(1.39)   | 1.45<br>(1.34) | 0.99 | 0.99 | 0.99 | 0.99 (0.98-<br>1.00) | 0.99 (0.97-<br>0.99)  | 0.99 (0.97-<br>0.99) |
| Left medial orbitofrontal cortex        | 19.05<br>(2.07) | 19.79<br>(2.53) | 19.30<br>(2.59) | 19.49<br>(2.72) | 10.89 | 12.77 | 13.40 | 13.96 | -2.95<br>(0.01) | -0.98<br>(0.33) | -1.39<br>(0.18) | 3.65<br>(6.47)  | 1.03<br>(6.60)    | 1.96<br>(8.03)   | 6.10<br>(4.11) | 5.04<br>(4.28)   | 5.99<br>(5.58) | 0.87 | 0.87 | 0.81 | 0.81 (0.54-<br>0.92) | 0.85 (0.69-<br>0.93)  | 0.78 (0.56-<br>0.89) |
| Left middle temporal gyrus              | 35.06<br>(3.40) | 35.26<br>(3.35) | 34.99<br>(3.30) | 35.25<br>(3.43) | 9.69  | 9.51  | 9.44  | 9.73  | -2.16<br>(0.04) | 0.73<br>(0.47)  | -1.96<br>(0.06) | 0.60<br>(1.37)  | -0.18<br>(1.31)   | 0.52<br>(1.36)   | 1.25<br>(0.79) | 1.00<br>(0.85)   | 1.13<br>(0.90) | 0.99 | 0.99 | 0.99 | 0.99 (0.97-<br>1.00) | 0.99 (0.98-<br>1.00)  | 0.99 (0.97-<br>1.00) |
| Left parahippocampal gyrus              | 6.77<br>(0.62)  | 6.82<br>(0.76)  | 6.78<br>(0.73)  | 6.81<br>(0.73)  | 9.09  | 11.09 | 10.75 | 10.68 | -0.77<br>(0.45) | -0.14<br>(0.89) | -0.81<br>(0.43) | 0.58<br>(4.59)  | -0.01<br>(4.39)   | 0.52<br>(3.80)   | 3.43<br>(3.04) | 3.15<br>(2.99)   | 2.83<br>(2.52) | 0.90 | 0.90 | 0.93 | 0.88 (0.76-<br>0.95) | 0.89 (0.77-<br>0.95)  | 0.92 (0.82-<br>0.96) |
| Left paracentral lobule                 | 14.19<br>(1.55) | 14.22<br>(1.62) | 14.24<br>(1.60) | 14.23<br>(1.61) | 10.95 | 11.38 | 11.21 | 11.30 | -0.45<br>(0.66) | -1.04<br>(0.31) | -0.77<br>(0.45) | 0.14<br>(2.09)  | 0.36<br>(1.81)    | 0.26<br>(1.94)   | 1.60<br>(1.31) | 1.47<br>(1.08)   | 1.58<br>(1.12) | 0.98 | 0.99 | 0.99 | 0.98 (0.96-<br>0.99) | 0.99 (0.97-<br>0.99)  | 0.99 (0.97-<br>0.99) |
| Left pars opercularis                   | 18.23<br>(2.09) | 18.25<br>(2.09) | 18.14<br>(2.13) | 18.21<br>(2.03) | 11.48 | 11.43 | 11.73 | 11.17 | -0.34<br>(0.74) | 1.42<br>(0.17)  | 0.23<br>(0.82)  | 0.14<br>(1.98)  | -0.50<br>(1.63)   | -0.09<br>(2.46)  | 1.65<br>(1.06) | 1.35<br>(1.02)   | 1.65<br>(1.80) | 0.98 | 0.99 | 0.97 | 0.99 (0.97-<br>0.99) | 0.99 (0.97-<br>1.00)  | 0.97 (0.94-<br>0.99) |
| Left pars orbitalis                     | 7.73<br>(0.88)  | 7.68<br>(1.05)  | 7.74<br>(0.98)  | 7.70<br>(0.99)  | 11.34 | 13.65 | 12.64 | 12.80 | 0.75<br>(0.46)  | -0.11<br>(0.91) | 0.60<br>(0.56)  | -0.90<br>(4.08) | -0.03<br>(4.22)   | -0.56<br>(3.35)  | 3.32<br>(2.45) | 3.28<br>(2.57)   | 2.56<br>(2.18) | 0.96 | 0.94 | 0.97 | 0.95 (0.88-<br>0.98) | 0.93 (0.85-<br>0.97)  | 0.96 (0.92-<br>0.98) |
| Left pars triangularis                  | 14.37<br>(1.76) | 14.46<br>(1.82) | 14.45<br>(1.76) | 14.45<br>(1.76) | 12.28 | 12.61 | 12.20 | 12.20 | -0.98<br>(0.34) | -0.93<br>(0.36) | -1.00<br>(0.33) | 0.63<br>(3.23)  | 0.57<br>(2.97)    | 0.62<br>(3.02)   | 2.62<br>(1.92) | 2.51<br>(1.61)   | 2.49<br>(1.75) | 0.97 | 0.97 | 0.97 | 0.97 (0.92-<br>0.98) | 0.97 (0.94-<br>0.99)  | 0.97 (0.93-<br>0.99) |
| Left pericalcarine cortex               | 15.91<br>(2.52) | 15.92<br>(2.54) | 16.03<br>(2.67) | 15.99<br>(2.60) | 15.84 | 15.96 | 16.67 |       |                 |                 |                 |                 |                   |                  |                |                  |                |      |      |      |                      |                       |                      |

|                                         |                 |                 |                 |                 |         |       |       |       |                 |                 |                 |                 |                 |                 |                |                |                |      |      |      |                  |                  |                  |
|-----------------------------------------|-----------------|-----------------|-----------------|-----------------|---------|-------|-------|-------|-----------------|-----------------|-----------------|-----------------|-----------------|-----------------|----------------|----------------|----------------|------|------|------|------------------|------------------|------------------|
| Left rostral anterior cingulate cortex  | 8.74<br>(1.50)  | 8.85<br>(1.68)  | 8.91<br>(1.66)  | 8.74<br>(1.49)  | 17.16   | 18.96 | 18.61 | 17.08 | -1.25<br>(0.22) | -2.08<br>(0.05) | 0.04<br>(0.97)  | 0.97<br>(4.99)  | 1.74<br>(4.89)  | -0.03<br>(4.09) | 3.68<br>(3.44) | 4.03<br>(3.19) | 3.24<br>(2.39) | 0.97 | 0.97 | 0.97 | 0.96 (0.92-0.98) | 0.96 (0.91-0.98) | 0.97 (0.93-0.99) |
| Left rostral middle frontal gyrus       | 65.63<br>(7.64) | 65.90<br>(7.78) | 65.70<br>(7.62) | 66.02<br>(7.68) | 11.65   | 11.80 | 11.61 | 11.63 | -1.48<br>(0.15) | -0.30<br>(0.77) | -1.76<br>(0.09) | 0.40<br>(1.40)  | 0.11<br>(1.78)  | 0.59<br>(1.72)  | 1.17<br>(0.84) | 1.37<br>(1.11) | 1.41<br>(1.12) | 0.99 | 0.99 | 0.99 | 0.99 (0.98-1.00) | 0.99 (0.97-0.99) | 0.99 (0.97-1.00) |
| Left superior frontal gyrus             | 78.98<br>(9.75) | 78.98<br>(9.59) | 78.73<br>(9.86) | 79.17<br>(9.92) | 12.35   | 12.15 | 12.53 | 12.53 | -0.04<br>(0.97) | 0.99<br>(0.33)  | -0.94<br>(0.36) | 0.03<br>(1.19)  | -0.33<br>(1.56) | 0.22<br>(1.27)  | 0.91<br>(0.75) | 1.24<br>(0.97) | 0.99<br>(0.80) | 1.00 | 0.99 | 0.99 | 1.00 (0.99-1.00) | 0.99 (0.98-1.00) | 0.99 (0.99-1.00) |
| Left superior parietal cortex           | 61.63<br>(7.94) | 61.52<br>(8.11) | 61.69<br>(8.02) | 61.42<br>(7.80) | 12.88   | 13.17 | 12.99 | 12.70 | 0.80<br>(0.43)  | -0.54<br>(0.59) | 1.48<br>(0.15)  | -0.22<br>(1.19) | 0.07<br>(0.86)  | -0.34<br>(1.14) | 0.78<br>(0.91) | 0.65<br>(0.54) | 0.98<br>(0.64) | 1.00 | 1.00 | 1.00 | 1.00 (0.99-1.00) | 1.00 (1.00-1.00) | 1.00 (0.99-1.00) |
| Left superior temporal gyrus            | 42.42<br>(5.41) | 42.55<br>(5.44) | 42.38<br>(5.46) | 42.50<br>(5.32) | 12.74   | 12.80 | 12.89 | 12.52 | -1.21<br>(0.24) | 0.44<br>(0.66)  | -0.63<br>(0.53) | 0.28<br>(1.21)  | -0.11<br>(0.96) | 0.20<br>(1.44)  | 0.94<br>(0.78) | 0.76<br>(0.57) | 1.08<br>(0.95) | 1.00 | 1.00 | 0.99 | 1.00 (0.99-1.00) | 1.00 (0.99-1.00) | 0.99 (0.98-1.00) |
| Left supramarginal gyrus                | 46.83<br>(8.81) | 46.96<br>(9.13) | 47.01<br>(9.09) | 47.04<br>(9.17) | 18.82   | 19.45 | 19.33 | 19.49 | -0.75<br>(0.46) | -1.40<br>(0.17) | -1.53<br>(0.14) | 0.20<br>(1.59)  | 0.32<br>(1.25)  | 0.33<br>(1.42)  | 1.25<br>(0.97) | 1.11<br>(0.61) | 1.14<br>(0.88) | 1.00 | 1.00 | 1.00 | 1.00 (0.99-1.00) | 1.00 (0.99-1.00) | 1.00 (0.99-1.00) |
| Left frontal pole                       | 2.88<br>(0.32)  | 2.83<br>(0.31)  | 2.71<br>(0.38)  | 2.87<br>(0.33)  | 11.18   | 10.89 | 13.88 | 11.51 | 1.51<br>(0.14)  | 4.22<br>(0.00)  | 0.24<br>(0.81)  | -1.84<br>(6.55) | -6.26<br>(7.67) | -0.34<br>(6.06) | 5.89<br>(3.21) | 7.70<br>(6.16) | 4.14<br>(4.36) | 0.84 | 0.85 | 0.86 | 0.83 (0.66-0.92) | 0.76 (0.28-0.91) | 0.87 (0.72-0.94) |
| Left temporal pole                      | 4.90<br>(0.64)  | 4.97<br>(0.56)  | 4.94<br>(0.65)  | 4.96<br>(0.62)  | 13.16   | 11.24 | 13.24 | 12.40 | -1.18<br>(0.25) | -1.05<br>(0.30) | -1.24<br>(0.23) | 1.80<br>(6.97)  | 0.89<br>(4.53)  | 1.44<br>(5.69)  | 5.29<br>(4.77) | 3.20<br>(3.27) | 4.51<br>(3.66) | 0.85 | 0.94 | 0.91 | 0.84 (0.68-0.93) | 0.94 (0.88-0.97) | 0.91 (0.80-0.96) |
| Left transverse temporal gyrus          | 4.58<br>(0.80)  | 4.60<br>(0.84)  | 4.63<br>(0.78)  | 4.65<br>(0.87)  | 17.51   | 18.21 | 16.95 | 18.68 | -0.40<br>(0.69) | -1.29<br>(0.21) | -2.01<br>(0.06) | 0.19<br>(4.30)  | 1.05<br>(3.95)  | 1.34<br>(3.93)  | 3.30<br>(2.68) | 3.22<br>(2.44) | 3.17<br>(2.60) | 0.97 | 0.98 | 0.98 | 0.97 (0.94-0.99) | 0.98 (0.94-0.99) | 0.98 (0.94-0.99) |
| Left insula                             | 23.89<br>(2.30) | 23.47<br>(2.49) | 23.73<br>(2.28) | 23.88<br>(2.68) | 9.64    | 10.59 | 9.62  | 11.23 | 1.56<br>(0.13)  | 0.56<br>(0.58)  | 0.04<br>(0.97)  | -1.87<br>(5.80) | -0.71<br>(6.31) | -0.20<br>(5.99) | 4.45<br>(4.09) | 4.47<br>(4.42) | 4.26<br>(4.12) | 0.84 | 0.79 | 0.82 | 0.83 (0.65-0.92) | 0.80 (0.59-0.90) | 0.82 (0.63-0.92) |
| Right banks superior temporal sulcus    | 9.66<br>(1.10)  | 9.62<br>(1.26)  | 9.65<br>(1.20)  | 9.56<br>(1.17)  | 11.34   | 13.10 | 12.39 | 12.22 | 0.39<br>(0.70)  | 0.07<br>(0.95)  | 1.27<br>(0.21)  | -0.57<br>(4.53) | -0.17<br>(3.19) | -1.11<br>(3.97) | 3.60<br>(2.71) | 2.26<br>(2.20) | 3.13<br>(2.62) | 0.93 | 0.97 | 0.95 | 0.93 (0.84-0.97) | 0.97 (0.93-0.99) | 0.94 (0.87-0.97) |
| Right caudal anterior cingulate cortex  | 7.28<br>(1.57)  | 7.28<br>(1.48)  | 7.34<br>(1.55)  | 7.27<br>(1.51)  | 21.60   | 20.35 | 21.12 | 20.75 | -0.03<br>(0.97) | -1.45<br>(0.16) | 0.26<br>(0.80)  | 0.21<br>(4.65)  | 0.95<br>(3.29)  | -0.03<br>(2.85) | 3.29<br>(3.21) | 2.89<br>(1.74) | 2.34<br>(1.54) | 0.97 | 0.99 | 0.99 | 0.97 (0.94-0.99) | 0.99 (0.98-1.00) | 0.99 (0.98-1.00) |
| Right caudal middle frontal gyrus       | 24.93<br>(2.93) | 24.66<br>(2.82) | 24.88<br>(3.03) | 25.05<br>(3.01) | 11.74   | 11.45 | 12.17 | 12.01 | 0.74<br>(0.47)  | 0.36<br>(0.72)  | -1.17<br>(0.25) | -1.03<br>(7.11) | -0.21<br>(2.35) | 0.47<br>(2.04)  | 2.83<br>(6.59) | 1.66<br>(1.65) | 1.65<br>(1.25) | 0.80 | 0.98 | 0.99 | 0.80 (0.61-0.91) | 0.98 (0.95-0.99) | 0.98 (0.97-0.99) |
| Right cuneus                            | 18.12<br>(3.12) | 18.16<br>(3.14) | 18.24<br>(3.14) | 18.15<br>(3.23) | 17.23   | 17.27 | 17.19 | 17.80 | -0.46<br>(0.65) | -1.65<br>(0.11) | -0.41<br>(0.69) | 0.24<br>(2.49)  | 0.72<br>(2.10)  | 0.13<br>(2.12)  | 1.86<br>(1.63) | 1.74<br>(1.33) | 1.66<br>(1.28) | 0.99 | 0.99 | 0.99 | 0.99 (0.97-0.99) | 0.99 (0.98-1.00) | 0.99 (0.98-1.00) |
| Right entorhinal cortex                 | 4.29<br>(0.77)  | 4.37<br>(0.81)  | 4.42<br>(0.78)  | 4.36<br>(0.82)  | 18.02   | 18.51 | 17.55 | 18.74 | -1.77<br>(0.09) | -1.90<br>(0.07) | -1.18<br>(0.25) | 1.75<br>(5.44)  | 3.05<br>(8.45)  | 1.50<br>(7.23)  | 4.24<br>(3.75) | 7.19<br>(5.22) | 5.66<br>(4.61) | 0.96 | 0.90 | 0.93 | 0.95 (0.90-0.98) | 0.89 (0.76-0.95) | 0.93 (0.84-0.97) |
| Right fusiform gyrus                    | 33.09<br>(4.17) | 33.02<br>(4.27) | 32.93<br>(4.15) | 33.08<br>(4.20) | 12.60   | 12.92 | 12.59 | 12.70 | 0.80<br>(0.43)  | 1.50<br>(0.15)  | 0.11<br>(0.91)  | -0.25<br>(1.39) | -0.49<br>(1.74) | -0.04<br>(1.54) | 1.14<br>(0.80) | 1.27<br>(1.26) | 1.25<br>(0.86) | 0.99 | 0.99 | 0.99 | 0.99 (0.99-1.00) | 0.99 (0.98-1.00) | 0.99 (0.98-1.00) |
| Right inferior parietal cortex          | 60.29<br>(8.28) | 60.58<br>(8.33) | 60.43<br>(8.36) | 60.62<br>(8.06) | 13.73   | 13.76 | 13.83 | 13.30 | -1.04<br>(0.31) | -0.88<br>(0.39) | -1.58<br>(0.13) | 0.47<br>(2.14)  | 0.25<br>(1.43)  | 0.60<br>(1.72)  | 1.30<br>(1.74) | 1.00<br>(1.03) | 1.29<br>(1.26) | 0.99 | 1.00 | 0.99 | 0.99 (0.97-0.99) | 1.00 (0.99-1.00) | 0.99 (0.98-1.00) |
| Right inferior temporal gyrus           | 35.51<br>(4.84) | 35.71<br>(4.82) | 35.52<br>(4.82) | 35.80<br>(4.92) | 13.64   | 13.50 | 13.58 | 13.74 | -1.81<br>(0.08) | -0.14<br>(0.89) | -2.59<br>(0.02) | 0.60<br>(1.63)  | 0.04<br>(1.51)  | 0.80<br>(1.63)  | 1.29<br>(1.14) | 1.13<br>(0.97) | 1.53<br>(0.94) | 0.99 | 0.99 | 0.99 | 0.99 (0.98-1.00) | 0.99 (0.99-1.00) | 0.99 (0.98-1.00) |
| Right isthmus cingulate cortex          | 10.30<br>(1.91) | 10.35<br>(1.90) | 10.27<br>(1.86) | 10.27<br>(1.87) | 18.59   | 18.37 | 18.14 | 18.20 | -0.94<br>(0.36) | 0.45<br>(0.66)  | 0.56<br>(0.58)  | 0.51<br>(2.93)  | -0.23<br>(2.93) | -0.31<br>(2.88) | 2.40<br>(1.69) | 2.25<br>(1.83) | 2.37<br>(1.61) | 0.99 | 0.99 | 0.99 | 0.99 (0.98-1.00) | 0.99 (0.97-0.99) | 0.99 (0.97-0.99) |
| Right lateral occipital cortex          | 56.82<br>(6.91) | 57.05<br>(7.34) | 56.88<br>(7.36) | 56.99<br>(7.47) | 12.16   | 12.87 | 12.94 | 13.11 | -1.16<br>(0.26) | -0.37<br>(0.71) | -0.92<br>(0.37) | 0.33<br>(1.65)  | 0.04<br>(1.39)  | 0.20<br>(1.52)  | 1.17<br>(1.19) | 1.09<br>(0.83) | 1.16<br>(0.98) | 0.99 | 0.99 | 0.99 | 0.99 (0.98-1.00) | 0.99 (0.98-1.00) | 0.99 (0.98-1.00) |
| Right lateral orbitofrontal cortex      | 28.61<br>(4.00) | 28.27<br>(3.59) | 27.95<br>(3.35) | 27.81<br>(3.41) | 13.98   | 12.71 | 11.99 | 12.26 | 0.94<br>(0.36)  | 1.85<br>(0.08)  | 2.63<br>(0.01)  | -1.06<br>(6.15) | -2.11<br>(6.17) | -2.66<br>(5.17) | 4.97<br>(3.65) | 4.66<br>(4.48) | 4.44<br>(3.69) | 0.89 | 0.90 | 0.93 | 0.88 (0.76-0.95) | 0.87 (0.73-0.94) | 0.90 (0.74-0.96) |
| Right lingual gyrus                     | 34.59<br>(4.92) | 34.68<br>(4.98) | 34.54<br>(4.79) | 34.53<br>(4.85) | 14.21   | 14.35 | 13.86 | 14.04 | -0.85<br>(0.41) | 0.37<br>(0.72)  | 0.63<br>(0.63)  | 0.26<br>(1.63)  | -0.10<br>(1.80) | -0.14<br>(1.62) | 1.21<br>(1.10) | 1.38<br>(1.12) | 1.37<br>(0.81) | 0.99 | 0.99 | 0.99 | 0.99 (0.99-1.00) | 0.99 (0.98-1.00) | 0.99 (0.99-1.00) |
| Right medial orbitofrontal cortex       | 20.22<br>(2.26) | 20.34<br>(2.47) | 20.14<br>(2.25) | 20.36<br>(2.36) | 11.17   | 12.15 | 11.17 | 11.58 | -0.64<br>(0.53) | 0.56<br>(0.58)  | -0.78<br>(0.44) | 0.49<br>(4.67)  | -0.38<br>(3.40) | 0.68<br>(4.55)  | 3.33<br>(3.24) | 2.62<br>(2.13) | 3.53<br>(2.86) | 0.92 | 0.95 | 0.92 | 0.92 (0.82-0.96) | 0.96 (0.90-0.98) | 0.92 (0.83-0.96) |
| Right middle temporal gyrus             | 39.06<br>(3.82) | 39.27<br>(3.79) | 39.17<br>(3.78) | 39.04<br>(3.90) | 9.78    | 9.64  | 9.66  | 9.98  | -1.99<br>(0.06) | -1.05<br>(0.31) | 0.16<br>(0.88)  | 0.55<br>(1.34)  | 0.29<br>(1.29)  | -0.06<br>(1.44) | 1.15<br>(0.85) | 1.15<br>(0.61) | 1.17<br>(0.81) | 0.99 | 0.99 | 0.99 | 0.99 (0.97-1.00) | 0.99 (0.98-1.00) | 0.99 (0.98-1.00) |
| Right parahippocampal gyrus             | 6.31<br>(0.57)  | 6.31<br>(0.55)  | 6.38<br>(0.53)  | 6.32<br>(0.58)  | 9.10    | 8.79  | 8.24  | 9.14  | 0.13<br>(0.90)  | -1.46<br>(0.16) | -0.16<br>(0.88) | -0.07<br>(3.71) | 1.15<br>(3.75)  | 0.12<br>(4.29)  | 3.09<br>(1.95) | 3.12<br>(2.29) | 3.45<br>(2.45) | 0.92 | 0.91 | 0.89 | 0.92 (0.83-0.96) | 0.90 (0.80-0.96) | 0.90 (0.78-0.95) |
| Right paracentral lobule                | 15.56<br>(1.65) | 15.57<br>(1.78) | 15.52<br>(1.86) | 15.42<br>(1.87) | 10.63   | 11.42 | 12.01 | 12.12 | -0.05<br>(0.96) | 0.39<br>(0.70)  | 1.03<br>(0.31)  | -0.05<br>(3.99) | -0.44<br>(4.00) | -1.10<br>(4.87) | 2.19<br>(3.31) | 2.26<br>(3.29) | 2.74<br>(4.15) | 0.94 | 0.95 | 0.93 | 0.94 (0.87-0.97) | 0.94 (0.88-0.98) | 0.92 (0.83-0.96) |
| Right pars opercularis                  | 15.69<br>(1.49) | 15.79<br>(1.59) | 15.77<br>(1.60) | 15.79<br>(1.58) | 9.48    | 10.08 | 10.16 | 10.00 | -1.24<br>(0.23) | -0.98<br>(0.34) | -0.86<br>(0.40) | 0.59<br>(2.70)  | 0.40<br>(2.27)  | 0.57<br>(3.54)  | 1.89<br>(1.98) | 1.77<br>(1.44) | 2.59<br>(2.43) | 0.97 | 0.97 | 0.93 | 0.96 (0.92-0.98) | 0.97 (0.94-0.99) | 0.93 (0.86-0.97) |
| Right pars orbitalis                    | 9.15<br>(1.08)  | 9.22<br>(1.17)  | 9.23<br>(1.14)  | 9.17<br>(1.21)  | 11.81   | 12.71 | 12.33 | 13.17 | -0.99<br>(0.33) | -1.36<br>(0.19) | -0.25<br>(0.81) | 0.63<br>(3.44)  | 0.80<br>(3.10)  | 0.03<br>(3.34)  | 2.68<br>(2.17) | 2.61<br>(1.78) | 2.69<br>(1.91) | 0.96 | 0.97 | 0.97 | 0.96 (0.91-0.98) | 0.96 (0.92-0.98) | 0.96 (0.92-0.98) |
| Right pars triangularis                 | 16.77<br>(2.29) | 16.74<br>(2.21) | 16.96<br>(2.28) | 16.63<br>(2.16) | 13.68   | 13.21 | 13.45 | 13.02 | 0.35<br>(0.73)  | -2.10<br>(0.05) | 1.61<br>(0.12)  | -0.13<br>(3.08) | 1.10<br>(2.53)  | -0.77<br>(2.53) | 2.24<br>(2.07) | 2.17<br>(1.66) | 2.09<br>(1.57) | 0.98 | 0.98 | 0.98 | 0.98 (0.95-0.99) | 0.98 (0.95-0.99) | 0.98 (0.95-0.99) |
| Right pericalcarine cortex              | 16.90<br>(2.62) | 16.85<br>(2.63) | 16.91<br>(2.60) | 16.88<br>(2.64) | 15.48   | 15.63 | 15.39 | 15.62 | 0.53<br>(0.60)  | -0.21<br>(0.83) | 0.21<br>(0.83)  | -0.26<br>(2.28) | 0.11<br>(2.68)  | -0.13<br>(2.76) | 1.90<br>(1.23) | 2.07<br>(1.66) | 2.25<br>(1.53) | 0.99 | 0.99 | 0.98 | 0.99 (0.98-1.00) | 0.99 (0.97-0.99) | 0.98 (0.97-0.99) |
| Right postcentral gyrus                 | 41.25<br>(4.56) | 41.92<br>(4.00) | 41.33<br>(4.32) | 41.18<br>(5.17) | 11.05   | 9.55  | 10.45 | 12.54 | -1.38<br>(0.18) | -0.59<br>(0.56) | 0.31<br>(0.76)  | 1.77<br>(6.68)  | 0.26<br>(1.69)  | -0.40<br>(3.64) | 2.16<br>(6.56) | 1.25<br>(1.14) | 1.61<br>(3.27) | 0.85 | 0.99 | 0.98 | 0.84 (0.67-0.92) | 0.99 (0.98-1.00) | 0.98 (0.95-0.99) |
| Right posterior cingulate cortex        | 13.04<br>(2.22) | 12.97<br>(2.25) | 13.03<br>(2.19) | 13.06<br>(2.25) | 17.01   | 17.37 | 16.82 | 17.20 | 0.82<br>(0.42)  | 0.05<br>(0.96)  | -0.33<br>(0.75) | -0.57<br>(3.16) | -0.01<br>(1.85) | 0.14<br>(2.36)  | 2.22<br>(2.27) | 1.46<br>(1.10) | 1.70<br>(1.60) | 0.98 | 0.99 | 0.99 | 0.98 (0.96-0.99) | 0.99 (0.99-1.00) | 0.99 (0.98-1.00) |
| Right precentral gyrus                  | 51.25<br>(6.16) | 50.14<br>(4.14) | 50.65<br>(4.25) | 50.41<br>(4.00) | 12.02   | 8.25  | 8.39  | 7.93  | 1.49<br>(0.15)  | 1.16<br>(0.26)  | 1.30<br>(0.21)  | -1.88<br>(6.45) | -0.89<br>(4.12) | -1.33<br>(5.22) | 2.58<br>(6.20) | 1.89<br>(3.76) | 2.14<br>(4.94) | 0.80 | 0.94 | 0.88 | 0.73 (0.49-0.87) | 0.88 (0.74-0.94) | 0.80 (0.60-0.91) |
| Right precuneus                         | 45.42<br>(4.95) | 45.32<br>(4.87) | 45.32<br>(5.06) | 45.32<br>(4.67) | 10.89   | 10.75 | 11.16 | 10.30 | 0.39<br>(0.70)  | 0.65<br>(0.52)  | 0.49<br>(0.63)  | -0.20<br>(2.81) | -0.26<br>(1.78) | -0.17<br>(2.35) | 1.56<br>(2.33) | 1.17<br>(1.35) | 1.55<br>(1.74) | 0.97 | 0.99 | 0.98 | 0.97 (0.93-0.99) | 0.99 (0.97-0.99) | 0.98 (0.95-0.99) |
| Right rostral anterior cingulate cortex | 6.56<br>(1.36)  | 6.46<br>(1.32)  | 6.53<br>(1.42)  | 6.66<br>(1.39)  | 20.75   | 20.40 | 21.77 | 20.87 | 1.85<br>(0.08)  | 0.47<br>(0.64)  | -1.81<br>(0.08) | -1.43<br>(3.72) | -0.74<br>(5.11) | 1.47<br>(4.36)  | 3.18<br>(2.34) | 3.62<br>(3.61) | 3.66<br>(2.70) | 0.98 | 0.97 | 0.98 | 0.98 (0.95-0.99) | 0.97 (0.94-0.99) | 0.98 (0.95-0.99) |
| Right rostral middle frontal gyrus      | 66.90<br>(7.69) | 66.69<br>(7.66) | 66.61<br>(7.44) | 67.46<br>(7.60) | 11.49</ |       |       |       |                 |                 |                 |                 |                 |                 |                |                |                |      |      |      |                  |                  |                  |

|                                        |                 |                 |                 |                 |       |       |       |       |                 |                 |                 |                 |                  |                 |                |                  |                |      |      |      |                  |                   |                  |
|----------------------------------------|-----------------|-----------------|-----------------|-----------------|-------|-------|-------|-------|-----------------|-----------------|-----------------|-----------------|------------------|-----------------|----------------|------------------|----------------|------|------|------|------------------|-------------------|------------------|
| Right frontal pole                     | 3.42<br>(0.34)  | 3.52<br>(0.55)  | 3.27<br>(0.43)  | 3.39<br>(0.38)  | 9.83  | 15.72 | 13.11 | 11.16 | -1.26<br>(0.22) | 2.62<br>(0.02)  | 0.55<br>(0.59)  | 2.21<br>(10.79) | -4.99<br>(8.94)  | -0.98<br>(7.76) | 8.72<br>(6.50) | 7.74<br>(6.59)   | 6.31<br>(4.45) | 0.69 | 0.73 | 0.74 | 0.61 (0.30-0.80) | 0.67 (0.34-0.84)  | 0.74 (0.49-0.88) |
| Right temporal pole                    | 4.74<br>(0.61)  | 4.65<br>(0.69)  | 4.73<br>(0.67)  | 4.74<br>(0.64)  | 12.84 | 14.89 | 14.09 | 13.55 | 1.58<br>(0.13)  | 0.17<br>(0.87)  | -0.03<br>(0.98) | -2.12<br>(5.93) | -0.40<br>(5.36)  | -0.10<br>(7.01) | 4.88<br>(3.88) | 4.31<br>(3.09)   | 5.42<br>(4.30) | 0.92 | 0.94 | 0.85 | 0.91 (0.80-0.96) | 0.94 (0.86-0.97)  | 0.85 (0.69-0.93) |
| Right transverse temporal gyrus        | 3.85<br>(0.68)  | 3.83<br>(0.62)  | 3.81<br>(0.67)  | 3.83<br>(0.71)  | 17.72 | 16.28 | 17.67 | 18.43 | 0.43<br>(0.67)  | 1.15<br>(0.26)  | 0.88<br>(0.39)  | -0.26<br>(4.58) | -1.04<br>(4.71)  | -0.75<br>(3.95) | 3.90<br>(2.28) | 3.56<br>(3.18)   | 2.69<br>(2.95) | 0.97 | 0.97 | 0.98 | 0.96 (0.92-0.98) | 0.97 (0.93-0.99)  | 0.98 (0.96-0.99) |
| Right insula                           | 22.99<br>(2.14) | 23.49<br>(2.59) | 23.72<br>(3.18) | 24.00<br>(2.42) | 9.32  | 11.01 | 13.42 | 10.09 | -1.67<br>(0.11) | -1.95<br>(0.06) | -3.51<br>(0.00) | 1.95<br>(6.10)  | 2.70<br>(7.42)   | 4.22<br>(6.03)  | 3.86<br>(5.06) | 5.31<br>(5.77)   | 5.74<br>(4.55) | 0.82 | 0.82 | 0.81 | 0.79 (0.59-0.90) | 0.74 (0.49-0.88)  | 0.73 (0.34-0.89) |
| <b>Local cortical thickness (mm)</b>   |                 |                 |                 |                 |       |       |       |       |                 |                 |                 |                 |                  |                 |                |                  |                |      |      |      |                  |                   |                  |
| Left banks superior temporal sulcus    | 2.86<br>(0.15)  | 2.86<br>(0.15)  | 2.87<br>(0.15)  | 2.86<br>(0.15)  | 5.36  | 5.09  | 5.13  | 5.11  | 0.18<br>(0.86)  | -0.85<br>(0.40) | 0.28<br>(0.78)  | -0.05<br>(1.69) | 0.24<br>(1.31)   | -0.10<br>(1.95) | 1.21<br>(1.15) | 1.01<br>(0.85)   | 1.48<br>(1.24) | 0.95 | 0.97 | 0.93 | 0.95 (0.89-0.98) | 0.97 (0.93-0.99)  | 0.93 (0.85-0.97) |
| Left caudal anterior cingulate cortex  | 2.94<br>(0.24)  | 2.94<br>(0.25)  | 2.96<br>(0.24)  | 2.94<br>(0.23)  | 8.17  | 8.37  | 8.15  | 7.74  | -0.10<br>(0.92) | -1.14<br>(0.26) | -0.09<br>(0.93) | 0.03<br>(2.34)  | 0.75<br>(3.31)   | 0.08<br>(2.60)  | 1.73<br>(1.54) | 2.65<br>(2.07)   | 2.16<br>(1.38) | 0.96 | 0.92 | 0.95 | 0.96 (0.92-0.98) | 0.92 (0.83-0.96)  | 0.95 (0.89-0.98) |
| Left caudal middle frontal gyrus       | 2.75<br>(0.13)  | 2.73<br>(0.14)  | 2.75<br>(0.14)  | 2.74<br>(0.15)  | 4.72  | 5.14  | 4.92  | 5.40  | 1.21<br>(0.24)  | 0.13<br>(0.89)  | 0.99<br>(0.33)  | -0.48<br>(1.95) | -0.05<br>(1.60)  | -0.35<br>(1.65) | 1.60<br>(1.17) | 1.25<br>(0.97)   | 1.29<br>(1.06) | 0.93 | 0.95 | 0.96 | 0.93 (0.84-0.97) | 0.95 (0.89-0.98)  | 0.95 (0.89-0.98) |
| Left cuneus                            | 2.27<br>(0.13)  | 2.26<br>(0.13)  | 2.26<br>(0.14)  | 2.27<br>(0.13)  | 5.81  | 5.65  | 6.16  | 5.74  | 1.75<br>(0.09)  | 1.35<br>(0.19)  | -0.13<br>(0.90) | -0.34<br>(0.99) | -0.38<br>(1.37)  | 0.04<br>(1.43)  | 0.86<br>(0.58) | 1.10<br>(0.87)   | 1.06<br>(0.93) | 0.99 | 0.98 | 0.97 | 0.98 (0.96-0.99) | 0.97 (0.94-0.99)  | 0.97 (0.94-0.99) |
| Left entorhinal cortex                 | 3.37<br>(0.32)  | 3.37<br>(0.32)  | 3.38<br>(0.35)  | 3.39<br>(0.32)  | 9.37  | 9.46  | 10.32 | 9.38  | -0.17<br>(0.87) | -0.56<br>(0.58) | -0.85<br>(0.40) | 0.11<br>(3.39)  | 0.27<br>(3.39)   | 0.54<br>(3.42)  | 2.75<br>(1.90) | 2.79<br>(1.86)   | 2.34<br>(2.50) | 0.94 | 0.95 | 0.94 | 0.94 (0.87-0.97) | 0.95 (0.88-0.98)  | 0.94 (0.88-0.97) |
| Left fusiform gyrus                    | 2.98<br>(0.13)  | 2.98<br>(0.13)  | 2.98<br>(0.13)  | 2.99<br>(0.13)  | 4.49  | 4.49  | 4.36  | 4.32  | 0.37<br>(0.72)  | 0.18<br>(0.86)  | -0.90<br>(0.38) | -0.08<br>(1.04) | -0.03<br>(0.91)  | 0.13<br>(0.68)  | 0.79<br>(0.66) | 0.72<br>(0.53)   | 0.55<br>(0.41) | 0.97 | 0.98 | 0.99 | 0.97 (0.94-0.99) | 0.98 (0.95-0.99)  | 0.99 (0.97-0.99) |
| Left inferior parietal cortex          | 2.81<br>(0.09)  | 2.81<br>(0.09)  | 2.82<br>(0.09)  | 2.82<br>(0.09)  | 3.10  | 3.16  | 3.02  | 3.14  | 0.81<br>(0.43)  | -0.55<br>(0.59) | -0.53<br>(0.60) | -0.26<br>(1.59) | 0.14<br>(1.29)   | 0.13<br>(1.24)  | 1.30<br>(0.92) | 1.05<br>(0.73)   | 1.02<br>(0.68) | 0.87 | 0.91 | 0.92 | 0.87 (0.74-0.94) | 0.91 (0.82-0.96)  | 0.92 (0.83-0.97) |
| Left inferior temporal gyrus           | 2.93<br>(0.13)  | 2.92<br>(0.13)  | 2.92<br>(0.13)  | 2.91<br>(0.12)  | 4.52  | 4.52  | 4.59  | 4.25  | 0.84<br>(0.41)  | 1.14<br>(0.26)  | 1.98<br>(0.06)  | -0.19<br>(1.14) | -0.24<br>(1.07)  | -0.57<br>(1.45) | 0.86<br>(0.75) | 0.85<br>(0.68)   | 1.27<br>(0.89) | 0.97 | 0.97 | 0.95 | 0.97 (0.94-0.99) | 0.97 (0.94-0.99)  | 0.94 (0.86-0.97) |
| Left isthmus cingulate cortex          | 2.63<br>(0.19)  | 2.63<br>(0.16)  | 2.63<br>(0.18)  | 2.61<br>(0.17)  | 7.05  | 6.17  | 6.73  | 6.57  | 0.24<br>(0.81)  | 0.23<br>(0.82)  | 1.49<br>(0.15)  | -0.06<br>(2.01) | -0.08<br>(2.19)  | -0.56<br>(1.92) | 1.53<br>(1.28) | 1.78<br>(1.22)   | 1.65<br>(1.08) | 0.96 | 0.95 | 0.96 | 0.95 (0.89-0.98) | 0.95 (0.89-0.98)  | 0.96 (0.90-0.98) |
| Left lateral occipital cortex          | 2.47<br>(0.09)  | 2.46<br>(0.09)  | 2.47<br>(0.09)  | 2.47<br>(0.08)  | 3.58  | 3.76  | 3.52  | 3.44  | 2.58<br>(0.02)  | 0.54<br>(0.59)  | 2.22<br>(0.04)  | -0.53<br>(1.06) | -0.09<br>(0.89)  | -0.29<br>(0.67) | 0.80<br>(0.87) | 0.70<br>(0.54)   | 0.55<br>(0.49) | 0.96 | 0.97 | 0.98 | 0.95 (0.87-0.98) | 0.97 (0.93-0.99)  | 0.98 (0.95-0.99) |
| Left lateral orbitofrontal cortex      | 2.97<br>(0.12)  | 2.95<br>(0.10)  | 2.96<br>(0.11)  | 2.96<br>(0.12)  | 4.19  | 3.45  | 3.60  | 3.89  | 1.34<br>(0.19)  | 0.63<br>(0.54)  | 0.26<br>(0.80)  | -0.44<br>(1.68) | -0.19<br>(1.64)  | -0.07<br>(1.65) | 1.18<br>(1.26) | 1.14<br>(1.17)   | 1.36<br>(0.90) | 0.92 | 0.92 | 0.92 | 0.90 (0.78-0.95) | 0.91 (0.81-0.96)  | 0.92 (0.83-0.96) |
| Left lingual gyrus                     | 2.42<br>(0.13)  | 2.41<br>(0.13)  | 2.41<br>(0.13)  | 2.43<br>(0.14)  | 5.31  | 5.37  | 5.46  | 5.59  | 0.79<br>(0.44)  | 0.57<br>(0.58)  | -1.42<br>(0.17) | -0.18<br>(1.13) | -0.15<br>(1.30)  | 0.31<br>(1.17)  | 0.86<br>(0.73) | 1.13<br>(0.62)   | 1.03<br>(0.61) | 0.98 | 0.97 | 0.98 | 0.98 (0.95-0.99) | 0.97 (0.94-0.99)  | 0.98 (0.95-0.99) |
| Left medial orbitofrontal cortex       | 2.74<br>(0.15)  | 2.73<br>(0.14)  | 2.74<br>(0.14)  | 2.73<br>(0.16)  | 5.51  | 5.11  | 4.98  | 5.80  | 1.05<br>(0.30)  | 0.17<br>(0.87)  | 1.03<br>(0.31)  | -0.54<br>(2.58) | -0.06<br>(2.43)  | -0.47<br>(2.12) | 2.11<br>(1.53) | 1.81<br>(1.58)   | 1.64<br>(1.39) | 0.88 | 0.89 | 0.93 | 0.88 (0.74-0.94) | 0.89 (0.77-0.95)  | 0.92 (0.84-0.97) |
| Left middle temporal gyrus             | 3.08<br>(0.12)  | 3.06<br>(0.11)  | 3.06<br>(0.10)  | 3.00<br>(0.12)  | 3.79  | 3.59  | 3.41  | 4.00  | 1.66<br>(0.11)  | 2.10<br>(0.05)  | 5.57<br>(0.00)  | -0.51<br>(1.56) | -0.52<br>(1.25)  | -2.56<br>(2.29) | 1.24<br>(1.05) | 1.02<br>(0.87)   | 2.86<br>(1.90) | 0.91 | 0.94 | 0.83 | 0.91 (0.80-0.96) | 0.93 (0.84-0.97)  | 0.68 (0.02-0.89) |
| Left parahippocampal gyrus             | 3.15<br>(0.24)  | 3.15<br>(0.25)  | 3.16<br>(0.24)  | 3.18<br>(0.24)  | 7.52  | 7.84  | 7.62  | 7.57  | -0.81<br>(0.43) | -1.02<br>(0.32) | -3.15<br>(0.00) | 0.26<br>(1.72)  | 0.50<br>(2.47)   | 1.04<br>(1.67)  | 1.34<br>(1.08) | 1.89<br>(1.63)   | 1.46<br>(1.29) | 0.97 | 0.94 | 0.98 | 0.97 (0.94-0.99) | 0.94 (0.88-0.97)  | 0.97 (0.89-0.99) |
| Left paracentral lobule                | 2.69<br>(0.14)  | 2.69<br>(0.15)  | 2.70<br>(0.14)  | 2.70<br>(0.15)  | 5.36  | 5.68  | 5.09  | 5.38  | 0.49<br>(0.63)  | -0.99<br>(0.33) | -1.17<br>(0.26) | -0.15<br>(1.38) | 0.29<br>(1.40)   | 0.25<br>(1.09)  | 1.12<br>(0.78) | 1.07<br>(0.92)   | 0.93<br>(0.59) | 0.97 | 0.97 | 0.98 | 0.97 (0.93-0.99) | 0.96 (0.92-0.98)  | 0.98 (0.96-0.99) |
| Left pars opercularis                  | 2.87<br>(0.09)  | 2.86<br>(0.10)  | 2.87<br>(0.10)  | 2.87<br>(0.10)  | 3.26  | 3.44  | 3.46  | 3.56  | 1.09<br>(0.29)  | -0.34<br>(0.73) | 0.22<br>(0.83)  | -0.33<br>(1.48) | 0.10<br>(1.51)   | -0.07<br>(1.30) | 1.10<br>(1.01) | 1.22<br>(0.87)   | 0.99<br>(0.82) | 0.91 | 0.90 | 0.93 | 0.90 (0.80-0.96) | 0.90 (0.79-0.96)  | 0.93 (0.85-0.97) |
| Left pars orbitalis                    | 2.97<br>(0.15)  | 2.96<br>(0.12)  | 2.98<br>(0.15)  | 2.95<br>(0.14)  | 4.95  | 4.21  | 4.90  | 4.77  | 0.43<br>(0.67)  | -0.88<br>(0.39) | 1.42<br>(0.17)  | -0.16<br>(2.27) | 0.33<br>(1.86)   | -0.65<br>(2.29) | 1.43<br>(1.74) | 1.58<br>(0.99)   | 1.80<br>(1.52) | 0.89 | 0.93 | 0.89 | 0.88 (0.75-0.94) | 0.93 (0.84-0.97)  | 0.88 (0.75-0.95) |
| Left pars triangularis                 | 2.77<br>(0.14)  | 2.77<br>(0.12)  | 2.78<br>(0.13)  | 2.73<br>(0.13)  | 4.90  | 4.35  | 4.78  | 4.73  | -0.98<br>(0.34) | -0.82<br>(0.42) | 3.08<br>(0.01)  | 0.35<br>(1.71)  | 0.38<br>(2.35)   | -1.24<br>(2.05) | 1.26<br>(1.19) | 1.92<br>(1.37)   | 1.89<br>(1.43) | 0.94 | 0.89 | 0.91 | 0.93 (0.86-0.97) | 0.89 (0.76-0.95)  | 0.89 (0.68-0.95) |
| Left pericalcarine cortex              | 1.90<br>(0.14)  | 1.89<br>(0.13)  | 1.89<br>(0.15)  | 1.89<br>(0.14)  | 7.26  | 7.11  | 7.84  | 7.16  | 0.55<br>(0.59)  | 1.19<br>(0.25)  | 0.84<br>(0.41)  | -0.22<br>(2.07) | -0.46<br>(1.75)  | -0.30<br>(1.86) | 1.58<br>(1.31) | 1.46<br>(1.04)   | 1.49<br>(1.11) | 0.96 | 0.97 | 0.97 | 0.96 (0.91-0.98) | 0.97 (0.94-0.99)  | 0.97 (0.93-0.99) |
| Left postcentral gyrus                 | 2.38<br>(0.14)  | 2.37<br>(0.14)  | 2.38<br>(0.13)  | 2.38<br>(0.13)  | 5.76  | 5.71  | 5.62  | 5.53  | 1.62<br>(0.12)  | 0.14<br>(0.89)  | 0.62<br>(0.54)  | -0.51<br>(1.56) | -0.03<br>(1.16)  | -0.14<br>(1.20) | 1.10<br>(1.20) | 0.90<br>(0.72)   | 0.79<br>(0.90) | 0.96 | 0.98 | 0.98 | 0.96 (0.91-0.98) | 0.98 (0.95-0.99)  | 0.98 (0.95-0.99) |
| Left posterior cingulate cortex        | 2.77<br>(0.15)  | 2.76<br>(0.14)  | 2.77<br>(0.14)  | 2.76<br>(0.14)  | 5.35  | 5.20  | 5.20  | 5.10  | 1.06<br>(0.30)  | -0.96<br>(0.35) | 0.29<br>(0.78)  | -0.32<br>(1.51) | 0.26<br>(1.31)   | -0.07<br>(1.40) | 1.21<br>(0.93) | 1.05<br>(0.81)   | 1.07<br>(0.88) | 0.96 | 0.97 | 0.96 | 0.96 (0.91-0.98) | 0.97 (0.93-0.99)  | 0.96 (0.92-0.98) |
| Left precentral gyrus                  | 2.74<br>(0.13)  | 2.73<br>(0.13)  | 2.73<br>(0.13)  | 2.74<br>(0.14)  | 4.93  | 4.90  | 4.69  | 4.99  | 1.97<br>(0.06)  | 0.59<br>(0.56)  | 0.62<br>(0.54)  | -0.53<br>(1.33) | -0.17<br>(1.54)  | -0.16<br>(1.23) | 1.05<br>(0.96) | 1.13<br>(1.04)   | 1.00<br>(0.70) | 0.96 | 0.95 | 0.97 | 0.96 (0.90-0.98) | 0.95 (0.89-0.98)  | 0.97 (0.94-0.99) |
| Left precuneus                         | 2.76<br>(0.11)  | 2.75<br>(0.10)  | 2.76<br>(0.10)  | 2.76<br>(0.10)  | 3.89  | 3.75  | 3.59  | 3.47  | 1.33<br>(0.20)  | -0.60<br>(0.55) | -0.31<br>(0.76) | -0.24<br>(0.91) | 0.13<br>(0.97)   | 0.08<br>(1.08)  | 0.73<br>(0.58) | 0.82<br>(0.51)   | 0.88<br>(0.61) | 0.97 | 0.97 | 0.96 | 0.97 (0.94-0.99) | 0.97 (0.93-0.99)  | 0.96 (0.91-0.98) |
| Left rostral anterior cingulate cortex | 3.12<br>(0.15)  | 3.09<br>(0.13)  | 3.12<br>(0.12)  | 3.11<br>(0.14)  | 4.66  | 4.27  | 3.94  | 4.55  | 1.58<br>(0.13)  | -0.22<br>(0.83) | 0.44<br>(0.66)  | -0.84<br>(2.72) | 0.15<br>(2.67)   | -0.23<br>(2.76) | 2.22<br>(1.73) | 2.02<br>(1.70)   | 2.06<br>(1.79) | 0.82 | 0.81 | 0.82 | 0.81 (0.62-0.91) | 0.81 (0.61-0.91)  | 0.83 (0.65-0.92) |
| Left rostral middle frontal gyrus      | 2.59<br>(0.12)  | 2.60<br>(0.12)  | 2.59<br>(0.11)  | 2.58<br>(0.12)  | 4.47  | 4.44  | 4.26  | 4.62  | -0.35<br>(0.73) | 0.71<br>(0.48)  | 2.06<br>(0.05)  | 0.10<br>(1.35)  | -0.26<br>(1.89)  | -0.63<br>(1.53) | 1.05<br>(0.83) | 1.51<br>(1.12)   | 1.28<br>(1.02) | 0.95 | 0.91 | 0.94 | 0.96 (0.90-0.98) | 0.91 (0.80-0.96)  | 0.94 (0.86-0.97) |
| Left superior frontal gyrus            | 2.98<br>(0.13)  | 2.97<br>(0.12)  | 2.97<br>(0.12)  | 2.98<br>(0.13)  | 4.22  | 3.99  | 3.88  | 4.28  | 0.74<br>(0.47)  | 2.09<br>(0.05)  | -0.33<br>(0.75) | -0.21<br>(1.50) | -0.48<br>(1.19)  | 0.08<br>(1.32)  | 1.18<br>(0.91) | 0.99<br>(0.80)   | 1.03<br>(0.80) | 0.94 | 0.96 | 0.95 | 0.94 (0.86-0.97) | 0.95 (0.89-0.98)  | 0.95 (0.90-0.98) |
| Left superior parietal cortex          | 2.50<br>(0.11)  | 2.49<br>(0.12)  | 2.51<br>(0.11)  | 2.51<br>(0.11)  | 4.43  | 4.72  | 4.44  | 4.55  | 1.52<br>(0.14)  | -0.46<br>(0.65) | -0.37<br>(0.71) | -0.39<br>(1.26) | 0.10<br>(1.06)   | 0.08<br>(1.13)  | 0.89<br>(0.95) | 0.87<br>(0.57)   | 0.83<br>(0.76) | 0.96 | 0.97 | 0.97 | 0.96 (0.91-0.98) | 0.97 (0.94-0.99)  | 0.97 (0.93-0.99) |
| Left superior temporal gyrus           | 3.06<br>(0.16)  | 3.06<br>(0.16)  | 3.06<br>(0.16)  | 3.07<br>(0.16)  | 5.26  | 5.36  | 5.27  | 5.26  | 0.55<br>(0.59)  | 0.46<br>(0.65)  | -0.29<br>(0.77) | -0.14<br>(1.21) | -0.08<br>(0.90)  | 0.07<br>(1.17)  | 0.94<br>(0.76) | 0.68<br>(0.58)   | 0.97<br>(0.64) | 0.97 | 0.99 | 0.98 | 0.97 (0.94-0.99) | 0.99 (0.97-0.99)  | 0.98 (0.95-0.99) |
| Left supramarginal gyrus               | 2.85<br>(0.11)  | 2.84<br>(0.11)  | 2.85<br>(0.11)  | 2.86<br>(0.11)  | 3.82  | 3.92  | 3.75  | 3.81  | 0.92<br>(0.37)  | 0.31<br>(0.76)  | -0.65<br>(0.52) | -0.31<br>(1.68) | -0.07<br>(1.23)  | 0.16<br>(1.25)  | 1.41<br>(0.92) | 0.92<br>(0.80)   | 0.95<br>(0.81) | 0.91 | 0.95 | 0.95 | 0.91 (0.80-0.96) | 0.95 (0.89-0.98)  | 0.95 (0.89-0.98) |
| Left frontal pole                      | 3.08<br>(0.33)  | 3.07<br>(0.31)  | 2.80<br>(0.34)  | 3.07<br>(0.31)  | 10.71 | 10.08 | 12.12 | 10.15 | 0.54<br>(0.60)  | 4.01<br>(0.00)  | 0.55<br>(0.58)  | -0.33<br>(3.58) | -9.78<br>(12.42) | -0.41<br>(3.96) | 2.54<br>(2.48) | 10.48<br>(11.81) | 2.91<br>(2.66) | 0.94 | 0.44 | 0.92 | 0.94 (0.87-0.97) | 0.33 (-0.05-0.63) | 0.92 (0.84-0.97) |
| Left temporal pole                     | 3.74<br>(0.27)  | 3.74<br>(0.31)  | 3.76<br>(0.24)  | 3.74<br>(0.24)  | 7.29  | 8.19  | 6.44  | 6.53  | -0.02<br>(0.99) | -0.81<br>(0.43) | 0.12<br>(0.91)  | -0.07<br>(3.14) | 0.49<br>(2.79)   | -0.03<br>(3.63) | 2.40<br>(1.97) | 1.96<br>(2.      |                |      |      |      |                  |                   |                  |

|                                         |                   |                   |                   |                       |      |      |       |       |                 |                 |                 |                 |                  |                 |                |                 |                |      |      |      |                  |                   |                  |
|-----------------------------------------|-------------------|-------------------|-------------------|-----------------------|------|------|-------|-------|-----------------|-----------------|-----------------|-----------------|------------------|-----------------|----------------|-----------------|----------------|------|------|------|------------------|-------------------|------------------|
| Right caudal anterior cingulate cortex  | 2.77<br>(0.20)    | 2.77<br>(0.18)    | 2.76<br>(0.20)    | 2.77<br>(0.19)        | 7.05 | 6.62 | 7.14  | 6.89  | -0.43<br>(0.67) | 0.76<br>(0.46)  | 0.13<br>(0.89)  | 0.27<br>(2.77)  | -0.34<br>(2.27)  | -0.04<br>(2.20) | 2.25<br>(1.57) | 1.84<br>(1.33)  | 1.84<br>(1.15) | 0.92 | 0.95 | 0.95 | 0.92 (0.83-0.96) | 0.95 (0.89-0.98)  | 0.95 (0.89-0.98) |
| Right caudal middle frontal gyrus       | 2.80<br>(0.12)    | 2.80<br>(0.12)    | 2.81<br>(0.12)    | 2.80<br>(0.12)        | 4.37 | 4.13 | 4.21  | 4.23  | 0.13<br>(0.90)  | -0.33<br>(0.74) | -0.26<br>(0.80) | -0.02<br>(1.40) | 0.08<br>(1.12)   | 0.07<br>(1.31)  | 1.13<br>(0.80) | 0.88<br>(0.67)  | 1.10<br>(0.68) | 0.95 | 0.97 | 0.95 | 0.95 (0.88-0.98) | 0.97 (0.93-0.99)  | 0.95 (0.90-0.98) |
| Right cuneus                            | 2.25<br>(0.13)    | 2.25<br>(0.13)    | 2.24<br>(0.14)    | 2.25<br>(0.14)        | 5.61 | 5.85 | 6.07  | 6.23  | 0.92<br>(0.37)  | 1.72<br>(0.10)  | -0.01<br>(0.99) | -0.21<br>(1.07) | -0.51<br>(1.36)  | -0.03<br>(1.27) | 0.91<br>(0.57) | 1.19<br>(0.81)  | 1.04<br>(0.69) | 0.98 | 0.97 | 0.98 | 0.98 (0.96-0.99) | 0.97 (0.93-0.99)  | 0.98 (0.95-0.99) |
| Right entorhinal cortex                 | 3.48<br>(0.31)    | 3.46<br>(0.30)    | 3.45<br>(0.32)    | 3.48<br>(0.29)        | 8.97 | 8.65 | 9.24  | 8.42  | 0.56<br>(0.58)  | 0.67<br>(0.51)  | -0.02<br>(0.98) | -0.40<br>(4.00) | -0.66<br>(5.06)  | 0.06<br>(3.74)  | 2.90<br>(2.73) | 3.29<br>(3.84)  | 2.50<br>(2.73) | 0.90 | 0.86 | 0.91 | 0.91 (0.80-0.96) | 0.86 (0.71-0.94)  | 0.91 (0.81-0.96) |
| Right fusiform gyrus                    | 2.94<br>(0.10)    | 2.94<br>(0.11)    | 2.94<br>(0.11)    | 2.93<br>(0.10)        | 3.27 | 3.69 | 3.68  | 3.45  | -0.45<br>(0.65) | -1.11<br>(0.28) | 0.42<br>(0.68)  | 0.11<br>(1.35)  | 0.20<br>(0.96)   | -0.08<br>(0.92) | 1.08<br>(0.78) | 0.77<br>(0.59)  | 0.73<br>(0.54) | 0.93 | 0.97 | 0.96 | 0.93 (0.84-0.98) | 0.96 (0.91-0.98)  | 0.96 (0.92-0.98) |
| Right inferior parietal cortex          | 2.74<br>(0.12)    | 2.74<br>(0.12)    | 2.75<br>(0.12)    | 2.74<br>(0.12)        | 4.36 | 4.50 | 4.21  | 4.35  | -0.22<br>(0.83) | -1.49<br>(0.15) | -0.96<br>(0.35) | 0.06<br>(1.53)  | 0.39<br>(1.31)   | 0.24<br>(1.25)  | 1.20<br>(0.92) | 0.99<br>(0.92)  | 0.93<br>(0.85) | 0.94 | 0.96 | 0.96 | 0.94 (0.88-0.98) | 0.95 (0.90-0.98)  | 0.96 (0.91-0.98) |
| Right inferior temporal gyrus           | 2.87<br>(0.12)    | 2.87<br>(0.12)    | 2.88<br>(0.13)    | 2.87<br>(0.12)        | 4.34 | 4.05 | 4.39  | 4.09  | 0.00<br>(1.00)  | -1.99<br>(0.06) | 0.11<br>(0.91)  | 0.01<br>(1.85)  | 0.46<br>(1.15)   | -0.02<br>(1.35) | 1.38<br>(1.20) | 0.95<br>(0.77)  | 1.08<br>(0.78) | 0.91 | 0.97 | 0.95 | 0.91 (0.80-0.96) | 0.96 (0.91-0.98)  | 0.95 (0.89-0.98) |
| Right isthmus cingulate cortex          | 2.72<br>(0.24)    | 2.72<br>(0.22)    | 2.72<br>(0.24)    | 2.71<br>(0.23)        | 8.96 | 8.01 | 8.74  | 8.42  | -0.06<br>(0.95) | -0.17<br>(0.87) | 1.04<br>(0.31)  | 0.10<br>(2.11)  | 0.10<br>(2.08)   | -0.25<br>(1.39) | 1.68<br>(1.23) | 1.51<br>(1.40)  | 1.23<br>(0.63) | 0.98 | 0.97 | 0.99 | 0.97 (0.93-0.99) | 0.97 (0.93-0.99)  | 0.99 (0.97-0.99) |
| Right lateral occipital cortex          | 2.46<br>(0.08)    | 2.46<br>(0.08)    | 2.47<br>(0.08)    | 2.46<br>(0.07)        | 3.16 | 3.23 | 3.21  | 2.94  | 0.12<br>(0.90)  | -2.23<br>(0.04) | -0.35<br>(0.73) | -0.04<br>(1.37) | 0.32<br>(0.71)   | 0.08<br>(1.09)  | 1.06<br>(0.83) | 0.63<br>(0.45)  | 0.88<br>(0.61) | 0.91 | 0.97 | 0.94 | 0.91 (0.81-0.96) | 0.97 (0.93-0.99)  | 0.94 (0.86-0.97) |
| Right lateral orbitofrontal cortex      | 2.86<br>(0.13)    | 2.88<br>(0.12)    | 2.88<br>(0.10)    | 2.88<br>(0.11)        | 4.43 | 4.20 | 3.49  | 3.79  | -1.42<br>(0.17) | -1.65<br>(0.11) | -1.52<br>(0.14) | 0.77<br>(2.72)  | 0.90<br>(2.65)   | 0.91<br>(2.91)  | 2.07<br>(1.89) | 1.97<br>(1.95)  | 2.26<br>(2.00) | 0.81 | 0.81 | 0.76 | 0.80 (0.60-0.91) | 0.77 (0.55-0.89)  | 0.74 (0.50-0.88) |
| Right lingual gyrus                     | 2.42<br>(0.14)    | 2.42<br>(0.14)    | 2.42<br>(0.14)    | 2.42<br>(0.13)        | 5.60 | 5.69 | 5.93  | 5.53  | 0.05<br>(0.96)  | 0.54<br>(0.60)  | 0.34<br>(0.74)  | -0.02<br>(1.22) | -0.13<br>(1.04)  | -0.06<br>(0.86) | 0.90<br>(0.80) | 0.85<br>(0.59)  | 0.69<br>(0.50) | 0.98 | 0.98 | 0.99 | 0.98 (0.95-0.99) | 0.98 (0.96-0.99)  | 0.99 (0.97-0.99) |
| Right medial orbitofrontal cortex       | 2.82<br>(0.13)    | 2.82<br>(0.14)    | 2.82<br>(0.14)    | 2.82<br>(0.14)        | 4.62 | 4.94 | 4.93  | 4.86  | -0.24<br>(0.81) | 0.26<br>(0.79)  | -0.12<br>(0.90) | 0.08<br>(1.99)  | -0.10<br>(1.68)  | 0.04<br>(1.92)  | 1.61<br>(1.13) | 1.34<br>(0.98)  | 1.56<br>(1.08) | 0.92 | 0.94 | 0.92 | 0.92 (0.82-0.96) | 0.94 (0.86-0.97)  | 0.92 (0.83-0.96) |
| Right middle temporal gyrus             | 3.12<br>(0.12)    | 3.12<br>(0.11)    | 3.10<br>(0.14)    | 3.06<br>(0.11)        | 3.83 | 3.60 | 4.67  | 3.63  | -0.14<br>(0.89) | 1.42<br>(0.17)  | 4.44<br>(0.00)  | 0.05<br>(1.42)  | -0.69<br>(2.33)  | -1.76<br>(2.00) | 1.03<br>(0.95) | 1.56<br>(1.84)  | 2.08<br>(1.64) | 0.93 | 0.87 | 0.86 | 0.93 (0.85-0.97) | 0.85 (0.69-0.93)  | 0.77 (0.26-0.92) |
| Right parahippocampal gyrus             | 3.02<br>(0.19)    | 3.02<br>(0.19)    | 3.02<br>(0.18)    | 3.02<br>(0.18)        | 6.38 | 6.30 | 5.99  | 5.99  | 0.03<br>(0.98)  | -0.29<br>(0.78) | -0.46<br>(0.65) | -0.01<br>(1.93) | 0.12<br>(1.69)   | 0.19<br>(1.76)  | 1.54<br>(1.12) | 1.33<br>(1.01)  | 1.32<br>(1.16) | 0.95 | 0.96 | 0.96 | 0.96 (0.90-0.98) | 0.96 (0.92-0.98)  | 0.96 (0.91-0.98) |
| Right paracentral lobule                | 2.70<br>(0.15)    | 2.71<br>(0.15)    | 2.71<br>(0.15)    | 2.70<br>(0.15)        | 5.49 | 5.66 | 5.64  | 5.56  | -0.77<br>(0.45) | -1.29<br>(0.21) | -0.63<br>(0.53) | 0.22<br>(1.47)  | 0.28<br>(1.10)   | 0.12<br>(1.03)  | 0.98<br>(1.10) | 0.81<br>(0.78)  | 0.79<br>(0.64) | 0.97 | 0.98 | 0.98 | 0.97 (0.92-0.98) | 0.98 (0.95-0.99)  | 0.98 (0.96-0.99) |
| Right pars opercularis                  | 2.91<br>(0.11)    | 2.89<br>(0.12)    | 2.90<br>(0.10)    | 2.91<br>(0.11)        | 3.66 | 4.04 | 3.53  | 3.93  | 1.74<br>(0.10)  | 0.65<br>(0.52)  | 0.20<br>(0.85)  | -0.71<br>(2.01) | -0.15<br>(1.18)  | -0.07<br>(1.61) | 1.59<br>(1.39) | 0.93<br>(0.72)  | 1.10<br>(1.16) | 0.87 | 0.95 | 0.91 | 0.86 (0.70-0.93) | 0.95 (0.88-0.98)  | 0.91 (0.81-0.96) |
| Right pars orbitalis                    | 3.04<br>(0.16)    | 3.02<br>(0.15)    | 3.03<br>(0.15)    | 3.00<br>(0.15)        | 5.22 | 5.10 | 4.90  | 5.06  | 1.49<br>(0.15)  | 0.56<br>(0.58)  | 3.18<br>(0.00)  | -0.69<br>(2.33) | -0.17<br>(1.68)  | -1.24<br>(1.95) | 1.79<br>(1.60) | 1.29<br>(1.05)  | 1.89<br>(1.29) | 0.90 | 0.95 | 0.93 | 0.89 (0.77-0.95) | 0.95 (0.89-0.98)  | 0.90 (0.71-0.96) |
| Right pars triangularis                 | 2.85<br>(0.12)    | 2.84<br>(0.13)    | 2.84<br>(0.13)    | 2.83<br>(0.14)        | 4.39 | 4.54 | 4.65  | 4.86  | 0.93<br>(0.36)  | 1.18<br>(0.25)  | 1.54<br>(0.14)  | -0.34<br>(1.76) | -0.35<br>(1.40)  | -0.58<br>(1.82) | 1.31<br>(1.20) | 1.22<br>(0.73)  | 1.51<br>(1.14) | 0.92 | 0.95 | 0.93 | 0.92 (0.83-0.96) | 0.95 (0.89-0.98)  | 0.92 (0.83-0.96) |
| Right pericalcarine cortex              | 1.96<br>(0.17)    | 1.96<br>(0.17)    | 1.96<br>(0.18)    | 1.96<br>(0.18)        | 8.87 | 8.85 | 9.16  | 9.02  | -0.01<br>(0.99) | 0.62<br>(0.54)  | 0.57<br>(0.57)  | 0.01<br>(1.69)  | -0.29<br>(2.20)  | -0.24<br>(2.02) | 1.27<br>(1.09) | 1.61<br>(1.49)  | 1.56<br>(1.28) | 0.98 | 0.97 | 0.98 | 0.98 (0.96-0.99) | 0.97 (0.94-0.99)  | 0.98 (0.95-0.99) |
| Right postcentral gyrus                 | 2.36<br>(0.15)    | 2.35<br>(0.14)    | 2.36<br>(0.15)    | 2.36<br>(0.14)        | 6.18 | 6.09 | 6.55  | 6.13  | 0.89<br>(0.38)  | -0.29<br>(0.77) | -0.06<br>(0.95) | -0.52<br>(2.85) | 0.05<br>(1.22)   | 0.02<br>(1.25)  | 1.34<br>(2.55) | 1.00<br>(0.66)  | 1.05<br>(0.65) | 0.89 | 0.98 | 0.98 | 0.89 (0.76-0.95) | 0.98 (0.96-0.99)  | 0.98 (0.96-0.99) |
| Right posterior cingulate cortex        | 2.74<br>(0.14)    | 2.75<br>(0.16)    | 2.75<br>(0.15)    | 2.75<br>(0.15)        | 5.23 | 5.78 | 5.34  | 5.29  | -0.77<br>(0.45) | -1.04<br>(0.31) | -0.68<br>(0.50) | 0.18<br>(1.32)  | 0.41<br>(1.98)   | 0.18<br>(1.34)  | 1.05<br>(0.80) | 1.39<br>(1.44)  | 0.95<br>(0.94) | 0.97 | 0.93 | 0.97 | 0.97 (0.93-0.99) | 0.93 (0.84-0.97)  | 0.97 (0.93-0.99) |
| Right precentral gyrus                  | 2.70<br>(0.15)    | 2.72<br>(0.12)    | 2.71<br>(0.14)    | 2.71<br>(0.14)        | 5.38 | 4.51 | 5.02  | 5.07  | -1.03<br>(0.31) | -0.28<br>(0.78) | -1.31<br>(0.20) | 0.70<br>(3.29)  | 0.08<br>(1.13)   | 0.32<br>(1.18)  | 1.57<br>(2.97) | 0.85<br>(0.73)  | 0.97<br>(0.72) | 0.81 | 0.98 | 0.98 | 0.80 (0.60-0.90) | 0.98 (0.95-0.99)  | 0.98 (0.95-0.99) |
| Right precuneus                         | 2.74<br>(0.11)    | 2.74<br>(0.11)    | 2.74<br>(0.11)    | 2.74<br>(0.10)        | 4.11 | 3.91 | 3.97  | 3.81  | 0.55<br>(0.59)  | 0.04<br>(0.97)  | 0.15<br>(0.88)  | -0.12<br>(1.17) | 0.00<br>(0.75)   | -0.02<br>(0.92) | 0.87<br>(0.77) | 0.58<br>(0.47)  | 0.71<br>(0.57) | 0.96 | 0.98 | 0.98 | 0.96 (0.91-0.98) | 0.98 (0.96-0.99)  | 0.97 (0.94-0.99) |
| Right rostral anterior cingulate cortex | 3.24<br>(0.19)    | 3.22<br>(0.17)    | 3.24<br>(0.14)    | 3.21<br>(0.16)        | 5.85 | 5.19 | 4.33  | 4.93  | 1.13<br>(0.27)  | 0.19<br>(0.85)  | 1.75<br>(0.09)  | -0.42<br>(2.01) | -0.03<br>(2.63)  | -0.01<br>(2.97) | 1.75<br>(1.02) | 2.25<br>(1.28)  | 2.42<br>(1.95) | 0.94 | 0.91 | 0.86 | 0.93 (0.86-0.97) | 0.87 (0.73-0.94)  | 0.83 (0.66-0.92) |
| Right rostral middle frontal gyrus      | 2.68<br>(0.10)    | 2.69<br>(0.09)    | 2.68<br>(0.09)    | 2.67<br>(0.08)        | 3.64 | 3.32 | 3.51  | 3.09  | -0.34<br>(0.74) | 1.31<br>(0.20)  | 1.48<br>(0.15)  | 0.10<br>(1.35)  | -0.33<br>(1.29)  | -0.40<br>(1.37) | 0.98<br>(0.91) | 1.11<br>(0.71)  | 0.96<br>(1.05) | 0.93 | 0.94 | 0.93 | 0.93 (0.84-0.97) | 0.93 (0.86-0.97)  | 0.91 (0.80-0.96) |
| Right superior frontal gyrus            | 3.06<br>(0.11)    | 3.06<br>(0.11)    | 3.05<br>(0.11)    | 3.06<br>(0.11)        | 3.61 | 3.65 | 3.68  | 3.50  | 0.41<br>(0.68)  | 2.07<br>(0.05)  | 0.28<br>(0.78)  | -0.09<br>(1.13) | -0.40<br>(0.97)  | -0.05<br>(1.03) | 0.95<br>(0.59) | 0.90<br>(0.53)  | 0.86<br>(0.53) | 0.95 | 0.97 | 0.96 | 0.95 (0.90-0.98) | 0.96 (0.91-0.98)  | 0.96 (0.91-0.98) |
| Right superior parietal cortex          | 2.48<br>(0.11)    | 2.48<br>(0.11)    | 2.49<br>(0.11)    | 2.48<br>(0.10)        | 4.32 | 4.35 | 4.38  | 4.18  | 0.14<br>(0.89)  | -1.46<br>(0.16) | 0.35<br>(0.73)  | -0.03<br>(1.18) | 0.25<br>(0.87)   | -0.07<br>(1.03) | 1.00<br>(0.59) | 0.67<br>(0.59)  | 0.79<br>(0.65) | 0.96 | 0.98 | 0.97 | 0.96 (0.92-0.98) | 0.98 (0.95-0.99)  | 0.97 (0.94-0.99) |
| Right superior temporal gyrus           | 3.09<br>(0.14)    | 3.09<br>(0.13)    | 3.08<br>(0.14)    | 3.09<br>(0.13)        | 4.61 | 4.31 | 4.62  | 4.35  | -0.17<br>(0.86) | 1.41<br>(0.17)  | 0.74<br>(0.46)  | 0.06<br>(1.29)  | -0.35<br>(1.24)  | -0.20<br>(1.45) | 1.03<br>(0.76) | 0.90<br>(0.92)  | 1.01<br>(1.05) | 0.96 | 0.96 | 0.95 | 0.96 (0.91-0.98) | 0.96 (0.92-0.98)  | 0.95 (0.89-0.98) |
| Right supramarginal gyrus               | 2.86<br>(0.10)    | 2.86<br>(0.11)    | 2.86<br>(0.10)    | 2.86<br>(0.10)        | 3.63 | 3.83 | 3.47  | 3.54  | 0.24<br>(0.81)  | -0.82<br>(0.42) | -0.71<br>(0.48) | -0.06<br>(1.17) | 0.18<br>(1.03)   | 0.16<br>(1.13)  | 0.94<br>(0.66) | 0.83<br>(0.62)  | 0.99<br>(0.53) | 0.95 | 0.96 | 0.95 | 0.95 (0.90-0.98) | 0.96 (0.91-0.98)  | 0.95 (0.89-0.98) |
| Right frontal pole                      | 3.01<br>(0.23)    | 3.03<br>(0.21)    | 2.75<br>(0.28)    | 3.02<br>(0.24)        | 7.73 | 6.96 | 10.17 | 8.10  | -0.68<br>(0.51) | 4.16<br>(0.00)  | -0.46<br>(0.65) | 0.79<br>(5.39)  | -9.05<br>(10.92) | 0.49<br>(5.67)  | 4.36<br>(3.15) | 10.97<br>(8.90) | 4.41<br>(3.49) | 0.73 | 0.29 | 0.74 | 0.73 (0.49-0.87) | 0.20 (-0.10-0.50) | 0.75 (0.50-0.88) |
| Right temporal pole                     | 3.72<br>(0.33)    | 3.73<br>(0.36)    | 3.71<br>(0.35)    | 3.66<br>(0.42)        | 8.92 | 9.72 | 9.34  | 11.34 | -0.61<br>(0.55) | 0.10<br>(0.92)  | 1.34<br>(0.19)  | 0.38<br>(3.76)  | -0.11<br>(3.08)  | -1.75<br>(6.25) | 2.85<br>(2.41) | 2.32<br>(1.97)  | 4.05<br>(5.02) | 0.92 | 0.95 | 0.87 | 0.92 (0.83-0.97) | 0.95 (0.89-0.98)  | 0.85 (0.68-0.93) |
| Right transverse temporal gyrus         | 2.94<br>(0.21)    | 2.95<br>(0.20)    | 2.96<br>(0.19)    | 2.94<br>(0.20)        | 7.08 | 6.65 | 6.58  | 6.67  | -0.65<br>(0.52) | -1.63<br>(0.12) | -0.34<br>(0.74) | 0.23<br>(1.56)  | 0.65<br>(1.90)   | 0.13<br>(1.54)  | 1.12<br>(1.09) | 1.53<br>(1.27)  | 1.11<br>(1.05) | 0.98 | 0.96 | 0.98 | 0.97 (0.94-0.99) | 0.96 (0.91-0.98)  | 0.98 (0.94-0.99) |
| Right insula                            | 3.27<br>(0.13)    | 3.27<br>(0.12)    | 3.26<br>(0.15)    | 3.25<br>(0.15)        | 3.84 | 3.75 | 4.67  | 4.56  | -0.11<br>(0.91) | 0.88<br>(0.39)  | 2.06<br>(0.05)  | 0.05<br>(1.97)  | -0.53<br>(2.85)  | -0.87<br>(2.07) | 1.33<br>(1.43) | 2.19<br>(1.85)  | 1.62<br>(1.53) | 0.87 | 0.80 | 0.89 | 0.88 (0.74-0.94) | 0.79 (0.58-0.90)  | 0.87 (0.72-0.94) |
| <b>Global brain measures</b>            |                   |                   |                   |                       |      |      |       |       |                 |                 |                 |                 |                  |                 |                |                 |                |      |      |      |                  |                   |                  |
| Left total cortical volume (ml)         | 300.22<br>(25.53) | 299.82<br>(25.75) | 299.47<br>(25.28) | 299.5<br>0<br>(25.95) | 8.50 | 8.59 | 8.44  | 8.66  | 0.83<br>(0.41)  | 1.62<br>(0.12)  | 1.55<br>(0.13)  | -0.14<br>(0.84) | -0.24<br>(0.77)  | -0.25<br>(0.78) | 0.63<br>(0.55) | 0.64<br>(0.47)  | 0.67<br>(0.44) | 1.00 | 1.00 | 1.00 | 1.00 (0.99-1.00) | 1.00 (0.99-1.00)  | 1.00 (0.99-1.00) |
| Right total cortical volume (ml)        | 302.42<br>(25.83) | 302.55<br>(25.85) | 301.41<br>(24.84) | 301.64<br>(25.48)     | 8.54 | 8.54 | 8.24  | 8.45  | -0.30<br>(0.76) | 2.10<br>(0.05)  | 1.68<br>(0.11)  | 0.05<br>(0.74)  | -0.31<br>(0.76)  | -0.25<br>(0.74) | 0.58<br>(0.45) | 0.60<br>(0.54)  | 0.59<br>(0.50) | 1.00 | 1.00 | 1.00 | 1.00 (0.99-1.00) | 0.99 (0.99-1.00)  | 1.00 (0.99-1.00) |
| Left total cortical white matter (ml)   | 206.04<br>(18.70) | 206.02<br>(18.92) | 205.93<br>(18.89) | 206.21<br>(18.87)     | 9.08 | 9.18 | 9.17  | 9.15  | 0.11<br>(0.92)  | 0.70<br>(0.49)  | -1.06<br>(0.30) | -0.02<br>(0.39) | -0.06<br>(0.35)  | 0.08<br>(0.40)  | 0.32<br>(0.21) | 0.28<br>(0.21)  | 0.31<br>(0.2   |      |      |      |                  |                   |                  |

|                                                      |                     |                     |                     |                     |       |       |       |       |                 |                 |                 |                 |                 |                 |                |                |                |      |      |      |                      |                      |                      |
|------------------------------------------------------|---------------------|---------------------|---------------------|---------------------|-------|-------|-------|-------|-----------------|-----------------|-----------------|-----------------|-----------------|-----------------|----------------|----------------|----------------|------|------|------|----------------------|----------------------|----------------------|
|                                                      |                     |                     |                     | (18.87<br>)         |       |       |       |       |                 |                 |                 |                 |                 |                 |                |                |                |      |      |      |                      |                      |                      |
| Left total cortical surface area (cm <sup>2</sup> )  | 937.46<br>(76.21)   | 939.09<br>(77.59)   | 937.91<br>(77.02)   | 940.04<br>(76.51)   | 8.13  | 8.26  | 8.21  | 8.14  | -2.57<br>(0.02) | -0.80<br>(0.43) | -3.76<br>(0.00) | 0.16<br>(0.33)  | 0.04<br>(0.29)  | 0.27<br>(0.36)  | 0.28<br>(0.24) | 0.22<br>(0.19) | 0.38<br>(0.23) | 1.00 | 1.00 | 1.00 | 1.00 (1.00-<br>1.00) | 1.00 (1.00-<br>1.00) | 1.00 (0.99-<br>1.00) |
| Right total cortical surface area (cm <sup>2</sup> ) | 940.55<br>(78.12)   | 941.38<br>(79.21)   | 940.13<br>(78.56)   | 941.83<br>(77.18)   | 8.31  | 8.41  | 8.36  | 8.19  | -1.36<br>(0.19) | 0.63<br>(0.53)  | -1.63<br>(0.12) | 0.08<br>(0.32)  | -0.05<br>(0.36) | 0.14<br>(0.42)  | 0.27<br>(0.17) | 0.28<br>(0.23) | 0.35<br>(0.26) | 1.00 | 1.00 | 1.00 | 1.00 (1.00-<br>1.00) | 1.00 (1.00-<br>1.00) | 1.00 (1.00-<br>1.00) |
| Left mean cortical thickness (mm)                    | 2.76<br>(0.08)      | 2.76<br>(0.07)      | 2.76<br>(0.07)      | 2.76<br>(0.08)      | 2.75  | 2.65  | 2.54  | 2.73  | 1.19<br>(0.25)  | 0.71<br>(0.48)  | 1.03<br>(0.31)  | -0.25<br>(1.05) | -0.12<br>(0.86) | -0.19<br>(0.92) | 0.82<br>(0.69) | 0.71<br>(0.49) | 0.78<br>(0.50) | 0.93 | 0.95 | 0.94 | 0.92 (0.84-<br>0.97) | 0.95 (0.89-<br>0.98) | 0.94 (0.88-<br>0.97) |
| Right mean cortical thickness (mm)                   | 2.76<br>(0.07)      | 2.76<br>(0.07)      | 2.76<br>(0.07)      | 2.76<br>(0.06)      | 2.54  | 2.48  | 2.56  | 2.29  | -0.14<br>(0.89) | 0.13<br>(0.90)  | 0.54<br>(0.59)  | 0.03<br>(0.89)  | -0.02<br>(0.66) | -0.08<br>(0.77) | 0.70<br>(0.53) | 0.51<br>(0.41) | 0.62<br>(0.45) | 0.94 | 0.97 | 0.95 | 0.94 (0.87-<br>0.97) | 0.97 (0.93-<br>0.99) | 0.95 (0.89-<br>0.98) |
| Left cerebellar white matter (ml)                    | 14.01<br>(1.53)     | 13.94<br>(1.36)     | 13.93<br>(1.49)     | 13.78<br>(1.43)     | 10.95 | 9.74  | 10.71 | 10.37 | 0.92<br>(0.36)  | 1.18<br>(0.25)  | 3.10<br>(0.00)  | -0.38<br>(2.52) | -0.53<br>(2.31) | -1.59<br>(2.67) | 2.04<br>(1.48) | 1.95<br>(1.28) | 2.35<br>(2.00) | 0.97 | 0.98 | 0.97 | 0.97 (0.93-<br>0.99) | 0.98 (0.95-<br>0.99) | 0.96 (0.87-<br>0.98) |
| Right cerebellar white matter (ml)                   | 13.49<br>(1.51)     | 13.47<br>(1.42)     | 13.49<br>(1.48)     | 13.31<br>(1.43)     | 11.23 | 10.52 | 10.97 | 10.73 | 0.27<br>(0.79)  | -0.05<br>(0.96) | 2.60<br>(0.02)  | -0.04<br>(2.15) | 0.07<br>(2.80)  | -1.25<br>(2.48) | 1.70<br>(1.27) | 2.22<br>(1.64) | 2.13<br>(1.75) | 0.98 | 0.97 | 0.98 | 0.98 (0.96-<br>0.99) | 0.97 (0.93-<br>0.99) | 0.97 (0.91-<br>0.99) |
| Left cerebellar gray matter (ml)                     | 56.08<br>(3.50)     | 56.00<br>(3.46)     | 56.00<br>(3.56)     | 56.30<br>(3.48)     | 6.25  | 6.18  | 6.36  | 6.18  | 0.80<br>(0.43)  | 1.42<br>(0.17)  | -3.40<br>(0.00) | -0.13<br>(0.85) | -0.15<br>(0.52) | 0.40<br>(0.59)  | 0.53<br>(0.66) | 0.42<br>(0.33) | 0.56<br>(0.43) | 0.99 | 1.00 | 1.00 | 0.99 (0.98-<br>1.00) | 1.00 (0.99-<br>1.00) | 0.99 (0.98-<br>1.00) |
| Right cerebellar gray matter (ml)                    | 55.94<br>(3.88)     | 55.84<br>(3.86)     | 55.92<br>(3.82)     | 56.24<br>(3.72)     | 6.93  | 6.91  | 6.84  | 6.62  | 1.20<br>(0.24)  | 0.18<br>(0.86)  | -3.96<br>(0.00) | -0.18<br>(0.80) | -0.02<br>(0.83) | 0.55<br>(0.69)  | 0.55<br>(0.61) | 0.63<br>(0.53) | 0.73<br>(0.49) | 0.99 | 0.99 | 1.00 | 0.99 (0.99-<br>1.00) | 0.99 (0.98-<br>1.00) | 0.99 (0.96-<br>1.00) |
| Intracranial volume (ml)                             | 1505.60<br>(102.22) | 1501.25<br>(107.35) | 1460.16<br>(104.25) | 1506.29<br>(102.87) | 6.79  | 7.15  | 7.14  | 6.83  | 1.16<br>(0.26)  | 7.01<br>(0.00)  | -0.74<br>(0.47) | -0.31<br>(1.36) | -3.09<br>(2.32) | 0.04<br>(0.30)  | 0.39<br>(1.34) | 3.09<br>(2.32) | 0.25<br>(0.18) | 0.99 | 0.95 | 1.00 | 0.98 (0.96-<br>0.99) | 0.87 (0.08-<br>0.96) | 1.00 (1.00-<br>1.00) |
| Total brain volume without ventricles (ml)           | 1212.24<br>(90.79)  | 1211.72<br>(91.63)  | 1210.12<br>(89.85)  | 1210.77<br>(90.94)  | 7.49  | 7.56  | 7.42  | 7.51  | 0.61<br>(0.55)  | 2.31<br>(0.03)  | 1.84<br>(0.08)  | -0.05<br>(0.36) | -0.17<br>(0.38) | -0.12<br>(0.33) | 0.26<br>(0.24) | 0.33<br>(0.24) | 0.30<br>(0.18) | 1.00 | 1.00 | 1.00 | 1.00 (1.00-<br>1.00) | 1.00 (1.00-<br>1.00) | 1.00 (1.00-<br>1.00) |

Abbreviations: SD = standard deviation; Orig = original scan; FS df = FreeSurfer defacing; FSL df = FSL defacing; FM = Face Masking; t = t-statistic; p=p-value; PD = Average Percentage Difference; CI = Confidence Interval.



**Table S2. Effects of de-identification on brain measures in young adults.**

| Brain metric                          | Mean (SD)    |              |              |              | Coefficient of Variation |       |        |       | Paired t-test t(p) |              |              | Signed PD in % |              |               | Absolute PD (%) |              |              | Pearson's r |        |      | ICC (95% CI)     |                  |                  |
|---------------------------------------|--------------|--------------|--------------|--------------|--------------------------|-------|--------|-------|--------------------|--------------|--------------|----------------|--------------|---------------|-----------------|--------------|--------------|-------------|--------|------|------------------|------------------|------------------|
|                                       | Orig         | FS df        | FSL df       | FM           | Orig                     | FS df | FSL df | FM    | FS df              | FSL df       | FM           | FS df          | FSL df       | FM            | FS df           | FSL df       | FM           | FS df       | FSL df | FM   | FS df            | FSL df           | FM               |
| <b>Subcortical volume (ml)</b>        |              |              |              |              |                          |       |        |       |                    |              |              |                |              |               |                 |              |              |             |        |      |                  |                  |                  |
| Left thalamus                         | 7.58 (0.91)  | 7.56 (0.95)  | 7.59 (0.88)  | 7.58 (0.83)  | 12.06                    | 12.55 | 11.61  | 10.95 | 0.53 (0.61)        | -0.12 (0.91) | -0.10 (0.92) | -0.35 (2.18)   | 0.13 (2.67)  | 0.18 (2.41)   | 1.75 (1.28)     | 2.18 (1.45)  | 1.61 (1.75)  | 0.98        | 0.98   | 0.99 | 0.98 (0.96-0.99) | 0.98 (0.93-0.99) | 0.98 (0.95-0.99) |
| Left caudatus                         | 3.85 (0.40)  | 3.85 (0.41)  | 3.84 (0.39)  | 3.82 (0.39)  | 10.28                    | 10.62 | 10.24  | 10.26 | 0.65 (0.53)        | 1.09 (0.29)  | 2.96 (0.01)  | -0.22 (1.10)   | -0.30 (1.08) | -0.79 (1.04)  | 0.90 (0.63)     | 0.92 (0.60)  | 1.09 (0.70)  | 0.99        | 0.99   | 0.99 | 0.99 (0.98-1.00) | 0.99 (0.98-1.00) | 0.99 (0.96-1.00) |
| Left putamen                          | 5.26 (0.74)  | 5.28 (0.70)  | 5.27 (0.72)  | 5.27 (0.69)  | 14.01                    | 13.32 | 13.65  | 13.07 | -0.61 (0.55)       | -0.49 (0.63) | -0.43 (0.67) | 0.54 (3.34)    | 0.24 (1.64)  | 0.41 (2.99)   | 1.78 (2.84)     | 1.35 (0.89)  | 1.45 (2.63)  | 0.98        | 0.99   | 0.98 | 0.98 (0.94-0.99) | 0.99 (0.98-1.00) | 0.98 (0.95-0.99) |
| Left pallidum                         | 1.92 (0.24)  | 1.96 (0.24)  | 1.94 (0.23)  | 1.93 (0.22)  | 12.57                    | 12.36 | 11.83  | 11.60 | -1.88 (0.08)       | -1.54 (0.14) | -0.43 (0.67) | 2.13 (4.55)    | 1.11 (2.66)  | 0.47 (3.30)   | 3.67 (3.34)     | 2.14 (1.88)  | 2.57 (2.03)  | 0.94        | 0.98   | 0.97 | 0.93 (0.79-0.97) | 0.97 (0.93-0.99) | 0.96 (0.90-0.99) |
| Left hippocampus                      | 4.11 (0.34)  | 4.12 (0.35)  | 4.11 (0.34)  | 4.13 (0.36)  | 8.32                     | 8.49  | 8.24   | 8.80  | -0.41 (0.69)       | 0.20 (0.84)  | -1.21 (0.25) | 0.23 (2.42)    | -0.12 (2.38) | 0.53 (1.87)   | 2.06 (1.18)     | 1.77 (1.53)  | 1.37 (1.34)  | 0.96        | 0.96   | 0.98 | 0.96 (0.89-0.99) | 0.96 (0.89-0.99) | 0.98 (0.93-0.99) |
| Left amygdala                         | 1.73 (0.23)  | 1.74 (0.24)  | 1.74 (0.24)  | 1.72 (0.25)  | 13.41                    | 13.48 | 13.93  | 14.55 | -1.09 (0.29)       | -0.60 (0.56) | 0.30 (0.77)  | 0.99 (3.54)    | 0.55 (3.95)  | -0.43 (3.53)  | 3.00 (1.99)     | 3.26 (2.15)  | 2.82 (2.05)  | 0.96        | 0.96   | 0.97 | 0.96 (0.90-0.99) | 0.96 (0.89-0.99) | 0.97 (0.92-0.99) |
| Left accumbens                        | 0.62 (0.14)  | 0.64 (0.14)  | 0.64 (0.15)  | 0.65 (0.16)  | 22.05                    | 22.74 | 23.46  | 24.21 | -1.26 (0.23)       | -1.38 (0.19) | -2.10 (0.05) | 1.68 (6.98)    | 1.60 (5.32)  | 4.16 (8.29)   | 4.53 (5.46)     | 4.58 (2.95)  | 7.83 (4.67)  | 0.96        | 0.97   | 0.94 | 0.96 (0.89-0.99) | 0.97 (0.91-0.99) | 0.92 (0.75-0.97) |
| Right thalamus                        | 7.21 (0.85)  | 7.19 (0.84)  | 7.23 (0.83)  | 7.23 (0.85)  | 11.81                    | 11.71 | 11.48  | 11.71 | 0.49 (0.63)        | -0.42 (0.68) | -0.46 (0.65) | -0.26 (1.97)   | 0.28 (2.23)  | 0.25 (2.03)   | 1.59 (1.13)     | 1.75 (1.34)  | 1.71 (1.03)  | 0.98        | 0.98   | 0.99 | 0.99 (0.96-0.99) | 0.98 (0.95-0.99) | 0.99 (0.96-1.00) |
| Right caudatus                        | 3.92 (0.37)  | 3.89 (0.37)  | 3.91 (0.37)  | 3.93 (0.39)  | 9.53                     | 9.40  | 9.46   | 9.90  | 1.97 (0.07)        | 0.22 (0.83)  | -0.81 (0.43) | -0.75 (1.56)   | -0.11 (2.01) | 0.30 (1.57)   | 1.32 (1.09)     | 1.30 (1.50)  | 1.15 (1.08)  | 0.99        | 0.97   | 0.99 | 0.98 (0.95-0.99) | 0.98 (0.93-0.99) | 0.99 (0.96-1.00) |
| Right putamen                         | 5.29 (0.66)  | 5.27 (0.68)  | 5.31 (0.67)  | 5.27 (0.66)  | 12.48                    | 12.97 | 12.55  | 12.46 | 1.60 (0.13)        | -1.62 (0.13) | 1.65 (0.12)  | -0.39 (0.81)   | 0.30 (0.77)  | -0.46 (1.21)  | 0.79 (0.39)     | 0.69 (0.42)  | 0.99 (0.81)  | 1.00        | 1.00   | 1.00 | 1.00 (0.99-1.00) | 1.00 (0.99-1.00) | 1.00 (0.99-1.00) |
| Right pallidum                        | 1.89 (0.20)  | 1.90 (0.22)  | 1.89 (0.22)  | 1.87 (0.21)  | 10.85                    | 11.53 | 11.91  | 11.27 | -1.09 (0.29)       | -0.27 (0.79) | 0.96 (0.35)  | 0.53 (2.22)    | 0.06 (2.69)  | -0.94 (3.70)  | 1.75 (1.40)     | 2.07 (1.63)  | 2.53 (2.80)  | 0.98        | 0.98   | 0.95 | 0.98 (0.95-0.99) | 0.98 (0.93-0.99) | 0.95 (0.85-0.98) |
| Right hippocampus                     | 4.25 (0.34)  | 4.27 (0.35)  | 4.27 (0.35)  | 4.26 (0.34)  | 7.94                     | 8.25  | 8.12   | 8.00  | -0.83 (0.42)       | -1.69 (0.11) | -0.55 (0.59) | 0.30 (1.58)    | 0.45 (1.14)  | 0.14 (1.03)   | 1.23 (0.99)     | 1.02 (0.63)  | 0.88 (0.50)  | 0.98        | 0.99   | 0.99 | 0.98 (0.95-0.99) | 0.99 (0.97-1.00) | 0.99 (0.98-1.00) |
| Right amygdala                        | 1.90 (0.24)  | 1.87 (0.25)  | 1.87 (0.25)  | 1.85 (0.24)  | 12.73                    | 13.33 | 13.20  | 12.96 | 2.40 (0.03)        | 1.76 (0.10)  | 2.06 (0.06)  | -1.92 (3.19)   | -1.88 (4.05) | -2.99 (5.78)  | 2.45 (2.77)     | 3.28 (2.95)  | 4.97 (4.09)  | 0.97        | 0.95   | 0.90 | 0.96 (0.87-0.99) | 0.94 (0.84-0.98) | 0.88 (0.68-0.96) |
| Right accumbens                       | 0.63 (0.12)  | 0.63 (0.13)  | 0.63 (0.12)  | 0.63 (0.13)  | 19.31                    | 20.35 | 19.27  | 20.51 | -0.16 (0.87)       | -0.19 (0.85) | 0.00 (1.00)  | -0.04 (6.95)   | 0.24 (4.85)  | -0.24 (6.78)  | 4.86 (4.81)     | 3.61 (3.11)  | 5.37 (3.92)  | 0.95        | 0.97   | 0.94 | 0.95 (0.86-0.98) | 0.97 (0.92-0.99) | 0.94 (0.83-0.98) |
| <b>Ventricular volume (ml)</b>        |              |              |              |              |                          |       |        |       |                    |              |              |                |              |               |                 |              |              |             |        |      |                  |                  |                  |
| Third ventricle                       | 0.86 (0.38)  | 0.86 (0.39)  | 0.85 (0.39)  | 0.86 (0.39)  | 44.70                    | 45.12 | 45.64  | 45.09 | 0.64 (0.53)        | 1.79 (0.09)  | 0.77 (0.45)  | -0.54 (2.96)   | -1.16 (2.54) | -0.39 (1.70)  | 2.24 (1.93)     | 2.12 (1.76)  | 1.23 (1.20)  | 1.00        | 1.00   | 1.00 | 1.00 (0.99-1.00) | 1.00 (1.00-1.00) | 1.00 (1.00-1.00) |
| Left lateral ventricle                | 8.45 (5.15)  | 8.45 (5.15)  | 8.46 (5.14)  | 8.44 (5.14)  | 60.95                    | 61.00 | 60.72  | 60.90 | -0.04 (0.97)       | -1.64 (0.12) | 0.37 (0.72)  | -0.03 (1.04)   | 0.41 (1.17)  | -0.03 (0.67)  | 0.61 (0.83)     | 0.64 (1.05)  | 0.52 (0.40)  | 1.00        | 1.00   | 1.00 | 1.00 (1.00-1.00) | 1.00 (1.00-1.00) | 1.00 (1.00-1.00) |
| Left inferior lateral ventricle       | 0.41 (0.23)  | 0.41 (0.21)  | 0.43 (0.21)  | 0.41 (0.23)  | 55.57                    | 50.20 | 49.35  | 55.77 | -0.11 (0.92)       | -1.41 (0.18) | -0.03 (0.98) | 1.01 (20.68)   | 5.76 (13.68) | -0.28 (13.42) | 16.03 (12.43)   | 9.88 (10.88) | 10.10 (8.45) | 0.95        | 0.98   | 0.98 | 0.95 (0.85-0.98) | 0.98 (0.94-0.99) | 0.98 (0.94-0.99) |
| Right lateral ventricle               | 7.02 (3.69)  | 6.99 (3.68)  | 6.99 (3.70)  | 7.02 (3.68)  | 52.60                    | 52.72 | 52.94  | 52.39 | 2.19 (0.04)        | 2.17 (0.05)  | -0.02 (0.98) | -0.42 (0.92)   | -0.37 (0.64) | 0.04 (0.56)   | 0.74 (0.68)     | 0.57 (0.46)  | 0.39 (0.39)  | 1.00        | 1.00   | 1.00 | 1.00 (1.00-1.00) | 1.00 (1.00-1.00) | 1.00 (1.00-1.00) |
| Right inferior lateral ventricle      | 0.38 (0.18)  | 0.38 (0.19)  | 0.38 (0.18)  | 0.37 (0.19)  | 47.35                    | 49.60 | 46.72  | 51.17 | -0.16 (0.88)       | 0.73 (0.48)  | 0.92 (0.37)  | -0.54 (6.82)   | -0.41 (3.53) | -3.38 (12.60) | 4.44 (5.08)     | 2.64 (2.28)  | 6.07 (11.48) | 0.99        | 1.00   | 0.99 | 0.99 (0.98-1.00) | 1.00 (0.99-1.00) | 0.99 (0.97-1.00) |
| <b>Local cortical volume (ml)</b>     |              |              |              |              |                          |       |        |       |                    |              |              |                |              |               |                 |              |              |             |        |      |                  |                  |                  |
| Left banks superior temporal sulcus   | 2.74 (0.53)  | 2.71 (0.50)  | 2.73 (0.54)  | 2.68 (0.49)  | 19.45                    | 18.30 | 19.86  | 18.13 | 0.95 (0.36)        | 0.43 (0.67)  | 2.47 (0.03)  | -0.80 (3.76)   | -0.57 (4.00) | -2.05 (2.99)  | 3.30 (1.79)     | 3.01 (2.58)  | 3.05 (1.86)  | 0.98        | 0.97   | 0.99 | 0.98 (0.94-0.99) | 0.97 (0.93-0.99) | 0.98 (0.91-0.99) |
| Left caudal anterior cingulate cortex | 1.96 (0.57)  | 1.94 (0.57)  | 1.95 (0.56)  | 1.95 (0.57)  | 28.91                    | 29.45 | 28.44  | 28.95 | 1.50 (0.15)        | 0.12 (0.91)  | 0.25 (0.81)  | -1.16 (2.85)   | 0.08 (3.43)  | -0.16 (2.86)  | 2.15 (2.15)     | 2.87 (1.73)  | 2.34 (1.54)  | 1.00        | 0.99   | 1.00 | 1.00 (0.99-1.00) | 0.99 (0.98-1.00) | 1.00 (0.99-1.00) |
| Left caudal middle frontal gyrus      | 6.53 (0.89)  | 6.50 (0.87)  | 6.54 (0.90)  | 6.55 (0.89)  | 13.57                    | 13.32 | 13.82  | 13.66 | 0.79 (0.44)        | -0.29 (0.77) | -0.51 (0.62) | -0.45 (2.28)   | 0.09 (1.74)  | 0.30 (2.65)   | 1.72 (1.51)     | 1.30 (1.12)  | 2.05 (1.63)  | 0.98        | 0.99   | 0.98 | 0.98 (0.96-0.99) | 0.99 (0.98-1.00) | 0.98 (0.95-0.99) |
| Left cuneus                           | 3.39 (0.63)  | 3.36 (0.60)  | 3.38 (0.62)  | 3.39 (0.64)  | 18.67                    | 17.82 | 18.27  | 18.84 | 1.13 (0.28)        | 0.03 (0.97)  | -0.24 (0.81) | -0.67 (2.63)   | 0.03 (2.71)  | 0.15 (2.85)   | 2.25 (1.42)     | 2.22 (1.46)  | 2.21 (1.70)  | 0.99        | 0.99   | 0.99 | 0.99 (0.97-1.00) | 0.99 (0.97-1.00) | 0.99 (0.96-1.00) |
| Left entorhinal cortex                | 2.03 (0.34)  | 2.00 (0.32)  | 2.04 (0.31)  | 2.04 (0.38)  | 16.96                    | 16.11 | 14.99  | 18.80 | 0.81 (0.43)        | -0.16 (0.87) | -0.28 (0.78) | -1.42 (7.83)   | 0.74 (12.09) | 0.35 (9.55)   | 6.08 (4.91)     | 7.49 (9.32)  | 6.93 (6.34)  | 0.89        | 0.71   | 0.86 | 0.89 (0.72-0.96) | 0.72 (0.36-0.89) | 0.86 (0.64-0.95) |
| Left fusiform gyrus                   | 10.75 (1.15) | 10.69 (1.14) | 10.66 (1.23) | 10.70 (1.21) | 10.74                    | 10.69 | 11.50  | 11.27 | 1.06 (0.31)        | 1.61 (0.13)  | 1.44 (0.17)  | -0.56 (2.16)   | -0.86 (2.02) | -0.49 (1.17)  | 1.79 (1.26)     | 1.68 (1.36)  | 1.04 (0.70)  | 0.98        | 0.99   | 0.99 | 0.98 (0.95-0.99) | 0.98 (0.95-0.99) | 0.99 (0.98-1.00) |
| Left inferior parietal cortex         | 13.36 (2.06) | 13.31 (2.09) | 13.39 (2.18) | 13.43 (2.07) | 15.41                    | 15.73 | 16.30  | 15.43 | 1.36 (0.19)        | -0.33 (0.74) | -1.24 (0.23) | -0.45 (1.23)   | 0.02 (2.02)  | 0.48 (1.52)   | 1.07 (0.70)     | 1.47 (1.33)  | 1.25 (0.95)  | 1.00        | 0.99   | 0.99 | 1.00 (0.99-1.00) | 0.99 (0.98-1.00) | 0.99 (0.98-1.00) |
| Left inferior temporal gyrus          | 11.50 (1.31) | 11.46 (1.42) | 11.53 (1.46) | 11.45 (1.41) | 11.42                    | 12.36 | 12.66  | 12.34 | 0.60 (0.55)        | -0.52 (0.61) | 0.61 (0.55)  | -0.46 (2.40)   | 0.12 (2.19)  | -0.55 (2.93)  | 1.73 (1.67)     | 1.76 (1.24)  | 2.42 (1.64)  | 0.99        | 0.99   | 0.97 | 0.98 (0.95-0.99) | 0.99 (0.96-0.99) | 0.97 (0.92-0.99) |
| Left isthmus cingulate cortex         | 2.91 (0.43)  | 2.93 (0.45)  | 2.94 (0.48)  | 2.94 (0.43)  | 14.86                    | 15.51 | 16.28  | 14.67 | -0.95 (0.36)       | -1.53 (0.15) | -1.42 (0.18) | 0.70 (3.67)    | 1.01 (2.89)  | 0.96 (2.62)   | 2.79 (2.39)     | 2.29 (1.96)  | 2.22 (1.61)  | 0.98        | 0.98   | 0.98 | 0.97 (0.93-0.99) | 0.98 (0.94-0.99) | 0.98 (0.95-0.99) |
| Left lateral occipital cortex         | 12.84 (2.13) | 12.85 (2.06) | 12.85 (2.17) | 12.81 (2.08) | 16.56                    | 16.00 | 16.85  | 16.26 | -0.08 (0.94)       | -0.20 (0.84) | 0.61 (0.55)  | 0.11 (2.10)    | 0.06 (1.91)  | -0.21 (1.59)  | 1.55 (1.36)     | 1.58 (0.99)  | 1.16 (1.08)  | 0.99        | 0.99   | 1.00 | 0.99 (0.98-1.00) | 0.99 (0.98-1.00) | 1.00 (0.99-1.00) |
| Left lateral orbitofrontal cortex     | 8.01 (0.82)  | 8.04 (0.76)  | 8.02 (0.85)  | 8.04 (0.81)  | 10.23                    | 9.45  | 10.60  | 10.04 | -0.77 (0.45)       | -0.26 (0.80) | -1.05 (0.31) | 0.45 (2.02)    | 0.09 (2.16)  | 0.38 (1.44)   | 1.57 (1.29)     | 1.63 (1.36)  | 1.18 (0.86)  | 0.98        | 0.98   | 0.99 | 0.98 (0.95-0.99) | 0.98 (0.95-0.99) | 0.99 (0.97-1.00) |
| Left lingual gyrus                    | 6.98 (1.22)  | 6.99 (1.22)  | 7.00 (1.24)  | 6.98 (1.24)  | 17.50                    | 17.51 | 17.67  | 17.79 | -0.26 (0.80)       | -0.80 (0.43) | -0.27 (0.79) | 0.07 (1.17)    | 0.26 (1.47)  | 0.03 (1.03)   | 0.92 (0.68)     | 1.12 (0.94)  | 0.87 (0.52)  | 1.00        | 1.00   | 1.00 | 1.00 (0.99-1.00) | 1.00 (0.99-1.00) | 1.00 (1.00-1.00) |
| Left medial orbitofrontal cortex      | 5.22 (0.86)  | 5.06 (0.62)  | 5.11 (0.79)  | 5.21 (0.78)  | 16.49                    | 12.22 | 15.50  | 14.97 | 1.55 (0.14)        | 1.20 (0.25)  | 0.12 (0.91)  | -2.65 (8.16)   | -2.05 (7.35) | -0.06 (9.81)  | 7.41 (3.94)     | 6.22 (4.16)  | 8.34 (4.69)  | 0.88        | 0.90   | 0.82 | 0.82 (0.57-0.93) | 0.89 (0.72-0.96) | 0.82 (0.56-0.93) |
| Left middle temporal gyrus            | 11.22 (1.29) | 11.25 (1.22) | 11.24 (1.29) | 11.20 (1.27) | 11.52                    | 10.81 | 11.46  | 11.32 | -0.50 (0.62)       | -0.39 (0.70) | 0.35 (0.73)  | 0.43 (2.90)    | 0.22 (2.27)  | -0.12 (1.79)  | 2.28 (1.75)     | 1.50 (1.68)  | 1.36 (1.12)  | 0.97        | 0.98   | 0.99 | 0.97 (0.92-0.99) | 0.98 (0.95-0.99) | 0.99 (0.97-1.00) |

|                                        |                 |                 |                 |                 |       |       |       |       |                 |                 |                 |                 |                  |                 |                |                |                |      |      |      |                  |                  |                  |
|----------------------------------------|-----------------|-----------------|-----------------|-----------------|-------|-------|-------|-------|-----------------|-----------------|-----------------|-----------------|------------------|-----------------|----------------|----------------|----------------|------|------|------|------------------|------------------|------------------|
| Left parahippocampal gyrus             | 2.39<br>(0.28)  | 2.38<br>(0.26)  | 2.39<br>(0.28)  | 2.40<br>(0.27)  | 11.72 | 11.07 | 11.79 | 11.05 | 0.37<br>(0.71)  | 0.11<br>(0.92)  | -0.36<br>(0.72) | -0.34<br>(4.25) | -0.12<br>(4.55)  | 0.56<br>(5.23)  | 3.18<br>(2.72) | 3.34<br>(2.96) | 3.78<br>(3.52) | 0.93 | 0.93 | 0.89 | 0.93 (0.82-0.98) | 0.93 (0.82-0.98) | 0.89 (0.72-0.96) |
| Left paracentral lobule                | 3.85<br>(0.60)  | 3.86<br>(0.57)  | 3.88<br>(0.59)  | 3.86<br>(0.55)  | 15.51 | 14.76 | 15.33 | 14.36 | -0.40<br>(0.70) | -0.86<br>(0.40) | -0.16<br>(0.88) | 0.33<br>(2.71)  | 0.58<br>(2.66)   | 0.19<br>(1.82)  | 2.11<br>(1.65) | 1.91<br>(1.88) | 1.44<br>(1.06) | 0.99 | 0.98 | 0.99 | 0.99 (0.96-1.00) | 0.98 (0.96-0.99) | 0.99 (0.98-1.00) |
| Left pars opercularis                  | 4.93<br>(0.73)  | 4.84<br>(0.71)  | 4.86<br>(0.78)  | 4.85<br>(0.70)  | 14.78 | 14.75 | 16.13 | 14.53 | 3.38<br>(0.00)  | 1.94<br>(0.07)  | 2.20<br>(0.04)  | -1.87<br>(2.21) | -1.56<br>(2.85)  | -1.62<br>(2.86) | 2.48<br>(1.44) | 2.57<br>(1.92) | 2.41<br>(2.20) | 0.99 | 0.99 | 0.98 | 0.98 (0.88-0.99) | 0.98 (0.94-0.99) | 0.97 (0.91-0.99) |
| Left pars orbitalis                    | 2.53<br>(0.34)  | 2.54<br>(0.32)  | 2.54<br>(0.34)  | 2.53<br>(0.35)  | 13.49 | 12.58 | 13.38 | 13.81 | -0.38<br>(0.71) | -0.36<br>(0.73) | -0.06<br>(0.95) | 0.44<br>(3.61)  | 0.29<br>(3.18)   | 0.01<br>(4.10)  | 2.69<br>(2.35) | 2.39<br>(2.04) | 3.19<br>(2.45) | 0.96 | 0.97 | 0.95 | 0.96 (0.89-0.99) | 0.97 (0.92-0.99) | 0.96 (0.88-0.98) |
| Left pars triangularis                 | 3.89<br>(0.73)  | 3.91<br>(0.73)  | 3.89<br>(0.74)  | 3.93<br>(0.74)  | 18.87 | 18.65 | 19.04 | 18.90 | -0.81<br>(0.43) | 0.20<br>(0.84)  | -1.70<br>(0.11) | 0.60<br>(3.05)  | -0.20<br>(2.99)  | 1.02<br>(2.52)  | 2.22<br>(2.11) | 2.13<br>(2.04) | 2.18<br>(1.54) | 0.99 | 0.99 | 0.99 | 0.99 (0.97-1.00) | 0.99 (0.97-1.00) | 0.99 (0.97-1.00) |
| Left pericalcarine cortex              | 2.19<br>(0.47)  | 2.19<br>(0.48)  | 2.20<br>(0.46)  | 2.17<br>(0.47)  | 21.62 | 22.00 | 20.89 | 21.76 | 0.12<br>(0.91)  | -0.19<br>(0.85) | 0.83<br>(0.42)  | -0.15<br>(4.03) | 0.31<br>(4.26)   | -0.94<br>(3.86) | 3.21<br>(2.30) | 3.34<br>(2.51) | 3.01<br>(2.48) | 0.98 | 0.98 | 0.98 | 0.98 (0.95-0.99) | 0.98 (0.95-0.99) | 0.98 (0.95-0.99) |
| Left postcentral gyrus                 | 10.23<br>(1.45) | 10.21<br>(1.44) | 10.23<br>(1.46) | 10.20<br>(1.43) | 14.21 | 14.09 | 14.22 | 14.02 | 0.49<br>(0.63)  | 0.08<br>(0.94)  | 0.49<br>(0.63)  | -0.26<br>(1.91) | -0.05<br>(1.36)  | -0.29<br>(2.16) | 1.31<br>(1.38) | 1.02<br>(0.88) | 1.59<br>(1.43) | 0.99 | 0.99 | 0.99 | 0.99 (0.97-1.00) | 0.99 (0.98-1.00) | 0.99 (0.96-1.00) |
| Left posterior cingulate cortex        | 3.49<br>(0.60)  | 3.51<br>(0.57)  | 3.51<br>(0.60)  | 3.50<br>(0.61)  | 17.04 | 16.12 | 17.08 | 17.51 | -1.28<br>(0.22) | -1.15<br>(0.27) | -0.39<br>(0.70) | 0.69<br>(1.87)  | 0.42<br>(1.58)   | 0.19<br>(2.53)  | 1.42<br>(1.37) | 1.24<br>(1.02) | 1.99<br>(1.48) | 1.00 | 1.00 | 0.99 | 1.00 (0.99-1.00) | 1.00 (0.99-1.00) | 0.99 (0.97-1.00) |
| Left precentral gyrus                  | 13.69<br>(1.36) | 13.69<br>(1.30) | 13.72<br>(1.32) | 13.73<br>(1.39) | 9.96  | 9.46  | 9.63  | 10.11 | -0.08<br>(0.93) | -0.52<br>(0.61) | -0.87<br>(0.40) | 0.08<br>(1.75)  | 0.28<br>(1.94)   | 0.23<br>(1.29)  | 1.56<br>(0.69) | 1.37<br>(1.37) | 1.00<br>(0.82) | 0.99 | 0.98 | 0.99 | 0.99 (0.96-0.99) | 0.98 (0.95-0.99) | 0.99 (0.98-1.00) |
| Left precuneus                         | 10.50<br>(1.19) | 10.41<br>(1.25) | 10.49<br>(1.30) | 10.48<br>(1.22) | 11.31 | 11.96 | 12.38 | 11.61 | 2.04<br>(0.06)  | 0.21<br>(0.83)  | 0.60<br>(0.56)  | -0.89<br>(1.68) | -0.19<br>(1.50)  | -0.22<br>(1.35) | 1.56<br>(1.03) | 1.17<br>(0.90) | 1.04<br>(0.85) | 0.99 | 1.00 | 0.99 | 0.99 (0.96-1.00) | 0.99 (0.98-1.00) | 0.99 (0.98-1.00) |
| Left rostral anterior cingulate cortex | 3.06<br>(0.50)  | 3.05<br>(0.52)  | 3.09<br>(0.51)  | 3.09<br>(0.51)  | 16.48 | 16.90 | 16.39 | 16.65 | 0.31<br>(0.76)  | -1.00<br>(0.33) | -1.20<br>(0.25) | -0.30<br>(2.53) | 0.94<br>(3.60)   | 0.77<br>(2.71)  | 1.81<br>(1.73) | 2.87<br>(2.26) | 2.26<br>(1.59) | 0.99 | 0.97 | 0.99 | 0.99 (0.96-1.00) | 0.97 (0.93-0.99) | 0.99 (0.96-1.00) |
| Left rostral middle frontal gyrus      | 15.34<br>(2.11) | 15.34<br>(2.04) | 15.32<br>(2.10) | 15.38<br>(2.00) | 13.77 | 13.28 | 13.73 | 12.99 | -0.07<br>(0.94) | 0.32<br>(0.76)  | -0.51<br>(0.62) | 0.09<br>(1.97)  | -0.14<br>(1.93)  | 0.35<br>(2.05)  | 1.60<br>(1.08) | 1.52<br>(1.13) | 1.68<br>(1.14) | 0.99 | 0.99 | 0.99 | 0.99 (0.97-1.00) | 0.99 (0.98-1.00) | 0.99 (0.97-1.00) |
| Left superior frontal gyrus            | 23.51<br>(2.34) | 23.55<br>(2.33) | 23.37<br>(2.44) | 23.57<br>(2.40) | 9.94  | 9.89  | 10.44 | 10.20 | -0.42<br>(0.68) | 1.28<br>(0.22)  | -0.57<br>(0.58) | 0.17<br>(1.58)  | -0.64<br>(1.91)  | 0.25<br>(1.98)  | 1.08<br>(1.13) | 1.31<br>(1.50) | 1.39<br>(1.39) | 0.99 | 0.98 | 0.98 | 0.99 (0.97-1.00) | 0.98 (0.95-0.99) | 0.98 (0.95-0.99) |
| Left superior parietal cortex          | 14.57<br>(1.57) | 14.56<br>(1.59) | 14.58<br>(1.65) | 14.58<br>(1.70) | 10.74 | 10.94 | 11.34 | 11.63 | 0.15<br>(0.88)  | -0.25<br>(0.81) | -0.16<br>(0.87) | -0.07<br>(1.34) | 0.03<br>(1.50)   | -0.01<br>(1.87) | 0.93<br>(0.94) | 1.08<br>(1.00) | 1.50<br>(1.04) | 0.99 | 0.99 | 0.99 | 0.99 (0.98-1.00) | 0.99 (0.97-1.00) | 0.99 (0.96-1.00) |
| Left superior temporal gyrus           | 12.23<br>(1.27) | 12.28<br>(1.28) | 12.27<br>(1.33) | 12.31<br>(1.26) | 10.35 | 10.39 | 10.84 | 10.24 | -0.86<br>(0.40) | -0.71<br>(0.49) | -1.21<br>(0.25) | 0.38<br>(1.81)  | 0.31<br>(2.03)   | 0.63<br>(2.12)  | 1.32<br>(1.25) | 1.53<br>(1.32) | 1.76<br>(1.27) | 0.98 | 0.98 | 0.98 | 0.98 (0.96-0.99) | 0.98 (0.95-0.99) | 0.98 (0.94-0.99) |
| Left supramarginal gyrus               | 11.97<br>(1.60) | 11.97<br>(1.58) | 11.97<br>(1.66) | 11.98<br>(1.69) | 13.39 | 13.24 | 13.87 | 14.10 | -0.02<br>(0.98) | -0.04<br>(0.97) | -0.21<br>(0.84) | 0.03<br>(2.58)  | -0.04<br>(2.19)  | 0.02<br>(1.97)  | 2.06<br>(1.45) | 1.71<br>(1.30) | 1.46<br>(1.27) | 0.98 | 0.99 | 0.99 | 0.98 (0.94-0.99) | 0.99 (0.96-1.00) | 0.99 (0.97-1.00) |
| Left frontal pole                      | 1.04<br>(0.14)  | 1.03<br>(0.14)  | 1.00<br>(0.11)  | 1.04<br>(0.15)  | 13.60 | 13.72 | 11.33 | 13.96 | 0.41<br>(0.69)  | 1.30<br>(0.21)  | -0.44<br>(0.67) | -0.42<br>(4.36) | -3.55<br>(10.44) | 0.60<br>(6.56)  | 2.67<br>(3.41) | 7.14<br>(8.25) | 5.12<br>(3.92) | 0.95 | 0.59 | 0.90 | 0.96 (0.88-0.98) | 0.57 (0.14-0.82) | 0.90 (0.75-0.97) |
| Left temporal pole                     | 2.63<br>(0.23)  | 2.66<br>(0.22)  | 2.65<br>(0.25)  | 2.65<br>(0.24)  | 8.66  | 8.29  | 9.61  | 9.25  | -0.82<br>(0.43) | -0.53<br>(0.61) | -0.51<br>(0.62) | 1.15<br>(5.83)  | 0.57<br>(5.02)   | 0.58<br>(4.92)  | 4.51<br>(3.71) | 4.04<br>(2.86) | 3.79<br>(3.03) | 0.79 | 0.86 | 0.85 | 0.79 (0.51-0.92) | 0.86 (0.64-0.95) | 0.85 (0.63-0.95) |
| Left transverse temporal gyrus         | 1.33<br>(0.19)  | 1.33<br>(0.20)  | 1.33<br>(0.22)  | 1.33<br>(0.20)  | 14.70 | 15.39 | 16.64 | 14.76 | -0.16<br>(0.88) | -0.69<br>(0.50) | -0.46<br>(0.65) | 0.09<br>(4.11)  | 0.45<br>(3.91)   | 0.42<br>(3.76)  | 2.93<br>(2.78) | 3.16<br>(2.21) | 2.91<br>(2.29) | 0.97 | 0.98 | 0.97 | 0.97 (0.91-0.99) | 0.97 (0.92-0.99) | 0.97 (0.92-0.99) |
| Left insula                            | 7.80<br>(0.81)  | 7.89<br>(1.08)  | 7.99<br>(0.94)  | 7.87<br>(0.90)  | 10.40 | 13.73 | 11.80 | 11.40 | -0.68<br>(0.50) | -1.88<br>(0.08) | -0.51<br>(0.62) | 0.77<br>(6.27)  | 2.22<br>(4.78)   | 0.66<br>(6.01)  | 4.55<br>(4.24) | 3.55<br>(3.83) | 5.07<br>(3.03) | 0.89 | 0.91 | 0.84 | 0.85 (0.64-0.95) | 0.88 (0.68-0.96) | 0.85 (0.62-0.94) |
| Right banks superior temporal sulcus   | 2.31<br>(0.32)  | 2.31<br>(0.34)  | 2.36<br>(0.35)  | 2.32<br>(0.40)  | 13.91 | 14.73 | 15.01 | 17.05 | -0.12<br>(0.91) | -2.16<br>(0.05) | -0.47<br>(0.64) | 0.01<br>(3.39)  | 1.81<br>(3.55)   | 0.14<br>(4.87)  | 2.98<br>(1.44) | 3.30<br>(2.11) | 3.70<br>(3.02) | 0.97 | 0.97 | 0.97 | 0.97 (0.93-0.99) | 0.96 (0.88-0.99) | 0.95 (0.86-0.98) |
| Right caudal anterior cingulate cortex | 2.45<br>(0.63)  | 2.45<br>(0.62)  | 2.42<br>(0.58)  | 2.45<br>(0.63)  | 25.86 | 25.43 | 23.93 | 25.54 | -0.48<br>(0.64) | 0.54<br>(0.59)  | -0.28<br>(0.78) | 0.46<br>(2.59)  | -0.60<br>(5.98)  | 0.30<br>(3.68)  | 1.98<br>(1.66) | 3.88<br>(4.48) | 2.84<br>(2.26) | 0.99 | 0.96 | 0.99 | 0.99 (0.98-1.00) | 0.96 (0.89-0.99) | 0.99 (0.97-1.00) |
| Right caudal middle frontal gyrus      | 6.49<br>(0.84)  | 6.50<br>(0.88)  | 6.49<br>(0.83)  | 6.45<br>(0.82)  | 12.89 | 13.51 | 12.75 | 12.65 | -0.23<br>(0.82) | 0.02<br>(0.98)  | 0.61<br>(0.55)  | 0.09<br>(2.98)  | 0.01<br>(2.73)   | -0.60<br>(4.05) | 2.36<br>(1.71) | 2.18<br>(1.54) | 2.84<br>(2.86) | 0.98 | 0.98 | 0.95 | 0.98 (0.93-0.99) | 0.98 (0.94-0.99) | 0.95 (0.87-0.98) |
| Right cuneus                           | 3.77<br>(0.74)  | 3.77<br>(0.76)  | 3.75<br>(0.69)  | 3.74<br>(0.72)  | 19.54 | 20.10 | 18.39 | 19.12 | 0.11<br>(0.91)  | 0.62<br>(0.55)  | 1.68<br>(0.11)  | -0.18<br>(1.95) | -0.30<br>(2.89)  | -0.75<br>(1.80) | 1.66<br>(0.94) | 2.39<br>(1.54) | 1.57<br>(1.10) | 1.00 | 0.99 | 1.00 | 0.99 (0.99-1.00) | 0.99 (0.97-1.00) | 0.99 (0.98-1.00) |
| Right entorhinal cortex                | 2.01<br>(0.33)  | 1.95<br>(0.46)  | 2.00<br>(0.38)  | 2.01<br>(0.41)  | 16.22 | 23.65 | 18.80 | 20.36 | 1.34<br>(0.20)  | 0.20<br>(0.84)  | -0.06<br>(0.95) | -4.30<br>(9.16) | -0.76<br>(7.04)  | -0.48<br>(8.92) | 7.68<br>(6.37) | 5.59<br>(4.10) | 7.70<br>(4.07) | 0.96 | 0.90 | 0.88 | 0.90 (0.74-0.96) | 0.90 (0.74-0.96) | 0.87 (0.66-0.95) |
| Right fusiform gyrus                   | 9.91<br>(1.62)  | 9.86<br>(1.52)  | 9.94<br>(1.45)  | 9.94<br>(1.52)  | 16.39 | 15.46 | 14.56 | 15.34 | 0.80<br>(0.44)  | -0.56<br>(0.58) | -0.57<br>(0.58) | -0.29<br>(2.24) | 0.59<br>(2.47)   | 0.46<br>(2.36)  | 1.64<br>(1.50) | 1.83<br>(1.70) | 1.63<br>(1.72) | 0.99 | 0.99 | 0.99 | 0.99 (0.98-1.00) | 0.99 (0.97-1.00) | 0.99 (0.97-1.00) |
| Right inferior parietal cortex         | 15.28<br>(2.33) | 15.24<br>(2.36) | 15.21<br>(2.39) | 15.16<br>(2.39) | 15.22 | 15.51 | 15.71 | 15.76 | 0.63<br>(0.54)  | 1.34<br>(0.20)  | 1.44<br>(0.17)  | -0.28<br>(1.49) | -0.52<br>(1.41)  | -0.86<br>(2.18) | 1.22<br>(0.85) | 1.15<br>(0.94) | 1.73<br>(1.53) | 1.00 | 1.00 | 0.99 | 1.00 (0.99-1.00) | 1.00 (0.99-1.00) | 0.99 (0.97-1.00) |
| Right inferior temporal gyrus          | 10.78<br>(1.13) | 10.81<br>(1.14) | 10.76<br>(1.11) | 10.69<br>(1.13) | 10.49 | 10.57 | 10.32 | 10.58 | -0.66<br>(0.52) | 0.36<br>(0.73)  | 1.42<br>(0.18)  | 0.30<br>(1.91)  | -0.17<br>(2.12)  | -0.78<br>(2.22) | 1.51<br>(1.15) | 1.69<br>(1.21) | 1.67<br>(1.61) | 0.98 | 0.98 | 0.98 | 0.98 (0.96-0.99) | 0.98 (0.95-0.99) | 0.98 (0.94-0.99) |
| Right isthmus cingulate cortex         | 2.84<br>(0.55)  | 2.85<br>(0.59)  | 2.86<br>(0.56)  | 2.86<br>(0.58)  | 19.35 | 20.73 | 19.55 | 20.09 | -0.32<br>(0.76) | -1.05<br>(0.31) | -1.49<br>(0.16) | 0.02<br>(2.61)  | 0.49<br>(2.28)   | 0.71<br>(2.09)  | 2.17<br>(1.33) | 1.92<br>(1.23) | 1.59<br>(1.49) | 0.99 | 0.99 | 0.99 | 0.99 (0.98-1.00) | 0.99 (0.98-1.00) | 0.99 (0.98-1.00) |
| Right lateral occipital cortex         | 13.27<br>(2.52) | 13.21<br>(2.47) | 13.23<br>(2.55) | 13.18<br>(2.49) | 18.96 | 18.68 | 19.25 | 18.87 | 0.87<br>(0.40)  | 0.70<br>(0.49)  | 1.53<br>(0.15)  | -0.42<br>(2.19) | -0.36<br>(1.65)  | -0.65<br>(1.81) | 1.82<br>(1.19) | 1.21<br>(1.13) | 1.64<br>(0.93) | 0.99 | 1.00 | 1.00 | 0.99 (0.98-1.00) | 1.00 (0.99-1.00) | 1.00 (0.99-1.00) |
| Right lateral orbitofrontal cortex     | 8.06<br>(0.98)  | 8.22<br>(1.06)  | 8.01<br>(0.98)  | 8.09<br>(0.84)  | 12.20 | 12.89 | 12.23 | 10.36 | -1.72<br>(0.11) | 0.87<br>(0.40)  | -0.47<br>(0.65) | 1.88<br>(4.38)  | -0.62<br>(2.78)  | 0.63<br>(3.67)  | 3.38<br>(3.28) | 1.90<br>(2.07) | 2.70<br>(2.47) | 0.94 | 0.97 | 0.96 | 0.93 (0.80-0.97) | 0.97 (0.93-0.99) | 0.95 (0.85-0.98) |
| Right lingual gyrus                    | 7.62<br>(1.12)  | 7.60<br>(1.13)  | 7.60<br>(1.15)  | 7.61<br>(1.10)  | 14.75 | 14.87 | 15.16 | 14.52 | 0.91<br>(0.38)  | 0.89<br>(0.39)  | 0.38<br>(0.71)  | -0.26<br>(1.11) | -0.34<br>(1.25)  | -0.10<br>(1.31) | 0.83<br>(0.75) | 1.03<br>(0.75) | 1.08<br>(0.69) | 1.00 | 1.00 | 1.00 | 1.00 (0.99-1.00) | 1.00 (0.99-1.00) | 1.00 (0.99-1.00) |
| Right medial orbitofrontal cortex      | 6.01<br>(0.74)  | 5.87<br>(0.75)  | 5.95<br>(0.73)  | 6.02<br>(0.78)  | 12.37 | 12.74 | 12.36 | 12.90 | 2.48<br>(0.03)  | 1.41<br>(0.18)  | -0.23<br>(0.82) | -2.39<br>(3.84) | -1.06<br>(3.20)  | 0.10<br>(3.54)  | 3.24<br>(3.10) | 2.48<br>(2.21) | 2.77<br>(2.08) | 0.95 | 0.97 | 0.97 | 0.94 (0.79-0.98) | 0.97 (0.91-0.99) | 0.97 (0.91-0.99) |
| Right middle temporal gyrus            | 12.16<br>(1.20) | 12.16<br>(1.23) | 12.04<br>(1.30) | 12.01<br>(1.19) | 9.85  | 10.11 | 10.77 | 9.94  | 0.10<br>(0.92)  | 2.40<br>(0.03)  | 1.89<br>(0.08)  | -0.06<br>(1.28) | -1.16<br>(1.92)  | -1.32<br>(2.68) | 1.04<br>(0.71) | 1.63<br>(1.51) | 2.36<br>(1.76) | 0.99 | 0.99 | 0.96 | 0.99 (0.98-1.00) | 0.98 (0.93-0.99) | 0.95 (0.87-0.98) |
| Right parahippocampal gyrus            | 2.20<br>(0.40)  | 2.22<br>(0.35)  | 2.23<br>(0.42)  | 2.24<br>(0.37)  | 18.36 | 15.66 | 18.65 | 16.39 | -0.67<br>(0.51) | -1.89<br>(0.08) | -1.27<br>(0.22) | 1.15<br>(4.33)  | 1.29<br>(3.10)   | 1.71<br>(4.11)  | 3.48<br>(2.69) | 2.77<br>(1.78) | 3.49<br>(2.65) | 0.98 | 0.99 | 0.97 | 0.97 (0.91-0.99) | 0.99 (0.96-1.00) | 0.97 (0.91-0.99) |
| Right paracentral lobule               | 4.31<br>(0.57)  | 4.31<br>(0.62)  | 4.33<br>(0.57)  | 4.30<br>(0.55)  | 13.12 | 14.33 | 13.13 | 12.74 | 0.09<br>(0.93)  | -0.69           |                 |                 |                  |                 |                |                |                |      |      |      |                  |                  |                  |

|                                                |                 |                 |                 |                 |       |       |       |       |                 |                 |                 |                 |                  |                 |                |                 |                |      |      |      |                  |                   |                  |
|------------------------------------------------|-----------------|-----------------|-----------------|-----------------|-------|-------|-------|-------|-----------------|-----------------|-----------------|-----------------|------------------|-----------------|----------------|-----------------|----------------|------|------|------|------------------|-------------------|------------------|
| Right postcentral gyrus                        | 9.48<br>(0.82)  | 9.50<br>(0.82)  | 9.48<br>(0.85)  | 9.44<br>(0.80)  | 8.60  | 8.62  | 8.94  | 8.45  | -0.50<br>(0.62) | 0.04<br>(0.97)  | 1.01<br>(0.33)  | 0.18<br>(1.40)  | -0.03<br>(1.37)  | -0.39<br>(1.56) | 1.21<br>(0.66) | 1.14<br>(0.69)  | 1.13<br>(1.11) | 0.99 | 0.99 | 0.98 | 0.99 (0.96-1.00) | 0.99 (0.96-1.00)  | 0.98 (0.95-0.99) |
| Right posterior cingulate cortex               | 3.66<br>(0.58)  | 3.69<br>(0.59)  | 3.67<br>(0.59)  | 3.68<br>(0.58)  | 15.82 | 15.96 | 15.95 | 15.84 | -1.14<br>(0.27) | -0.52<br>(0.61) | -0.92<br>(0.37) | 0.67<br>(2.37)  | 0.29<br>(2.14)   | 0.46<br>(1.85)  | 1.91<br>(1.49) | 1.77<br>(1.15)  | 1.49<br>(1.12) | 0.99 | 0.99 | 0.99 | 0.99 (0.97-1.00) | 0.99 (0.97-1.00)  | 0.99 (0.98-1.00) |
| Right precentral gyrus                         | 14.04<br>(1.49) | 14.07<br>(1.53) | 14.03<br>(1.49) | 14.02<br>(1.45) | 10.57 | 10.89 | 10.59 | 10.31 | -0.53<br>(0.60) | 0.28<br>(0.78)  | 0.48<br>(0.64)  | 0.12<br>(1.27)  | -0.12<br>(1.63)  | -0.16<br>(1.39) | 0.95<br>(0.81) | 1.22<br>(1.04)  | 0.99<br>(0.95) | 0.99 | 0.99 | 0.99 | 0.99 (0.98-1.00) | 0.99 (0.96-1.00)  | 0.99 (0.97-1.00) |
| Right precuneus                                | 10.80<br>(1.14) | 10.71<br>(1.16) | 10.76<br>(1.12) | 10.70<br>(1.08) | 10.52 | 10.84 | 10.44 | 10.08 | 1.81<br>(0.09)  | 1.22<br>(0.24)  | 2.34<br>(0.03)  | -0.84<br>(1.83) | -0.31<br>(1.10)  | -0.85<br>(1.53) | 1.44<br>(1.38) | 0.91<br>(0.66)  | 1.36<br>(1.06) | 0.99 | 1.00 | 0.99 | 0.98 (0.95-0.99) | 0.99 (0.99-1.00)  | 0.99 (0.95-1.00) |
| Right rostral anterior cingulate cortex        | 2.38<br>(0.45)  | 2.39<br>(0.50)  | 2.37<br>(0.44)  | 2.37<br>(0.47)  | 19.07 | 20.85 | 18.47 | 19.81 | -0.57<br>(0.58) | 0.49<br>(0.63)  | 0.80<br>(0.43)  | 0.29<br>(3.33)  | -0.33<br>(3.76)  | -0.59<br>(2.37) | 2.51<br>(2.10) | 2.86<br>(2.34)  | 1.86<br>(1.51) | 0.98 | 0.98 | 0.99 | 0.98 (0.95-0.99) | 0.98 (0.94-0.99)  | 0.99 (0.98-1.00) |
| Right rostral middle frontal gyrus             | 16.08<br>(2.07) | 16.08<br>(1.98) | 15.92<br>(2.10) | 16.01<br>(2.01) | 12.86 | 12.30 | 13.21 | 12.54 | 0.04<br>(0.97)  | 2.45<br>(0.03)  | 1.05<br>(0.31)  | 0.06<br>(1.65)  | -1.06<br>(1.86)  | -0.39<br>(1.67) | 1.31<br>(0.95) | 1.60<br>(1.40)  | 1.33<br>(1.03) | 0.99 | 0.99 | 0.99 | 0.99 (0.98-1.00) | 0.99 (0.96-1.00)  | 0.99 (0.98-1.00) |
| Right superior frontal gyrus                   | 23.13<br>(2.42) | 23.15<br>(2.42) | 22.95<br>(2.36) | 23.00<br>(2.39) | 10.45 | 10.44 | 10.27 | 10.39 | -0.20<br>(0.85) | 1.57<br>(0.14)  | 1.33<br>(0.20)  | 0.08<br>(1.53)  | -0.76<br>(1.93)  | -0.58<br>(1.84) | 1.11<br>(1.02) | 1.54<br>(1.35)  | 1.43<br>(1.25) | 0.99 | 0.98 | 0.99 | 0.99 (0.97-1.00) | 0.98 (0.94-0.99)  | 0.98 (0.96-0.99) |
| Right superior parietal cortex                 | 13.49<br>(1.59) | 13.51<br>(1.57) | 13.51<br>(1.48) | 13.54<br>(1.51) | 11.75 | 11.61 | 10.93 | 11.13 | -0.20<br>(0.84) | -0.26<br>(0.80) | -0.71<br>(0.49) | 0.12<br>(2.21)  | 0.20<br>(1.80)   | 0.42<br>(2.22)  | 1.69<br>(1.37) | 1.33<br>(1.18)  | 1.52<br>(1.62) | 0.98 | 0.99 | 0.99 | 0.99 (0.96-0.99) | 0.99 (0.97-1.00)  | 0.98 (0.96-0.99) |
| Right superior temporal gyrus                  | 12.33<br>(1.25) | 12.38<br>(1.28) | 12.29<br>(1.22) | 12.35<br>(1.25) | 10.16 | 10.37 | 9.92  | 10.14 | -1.03<br>(0.32) | 0.82<br>(0.42)  | -0.50<br>(0.63) | 0.37<br>(1.64)  | -0.31<br>(1.72)  | 0.22<br>(1.83)  | 1.29<br>(1.03) | 1.36<br>(1.06)  | 1.41<br>(1.12) | 0.99 | 0.99 | 0.98 | 0.99 (0.97-1.00) | 0.99 (0.97-1.00)  | 0.99 (0.96-0.99) |
| Right supramarginal gyrus                      | 10.77<br>(1.58) | 10.71<br>(1.57) | 10.72<br>(1.61) | 10.70<br>(1.54) | 14.70 | 14.65 | 15.00 | 14.37 | 1.78<br>(0.09)  | 0.90<br>(0.38)  | 1.29<br>(0.22)  | -0.51<br>(1.17) | -0.45<br>(1.92)  | -0.56<br>(1.89) | 1.05<br>(0.68) | 1.56<br>(1.14)  | 1.63<br>(1.05) | 1.00 | 0.99 | 0.99 | 1.00 (0.99-1.00) | 0.99 (0.98-1.00)  | 0.99 (0.98-1.00) |
| Right frontal pole                             | 1.24<br>(0.12)  | 1.27<br>(0.15)  | 1.18<br>(0.15)  | 1.23<br>(0.11)  | 9.52  | 12.12 | 13.05 | 9.14  | -1.61<br>(0.13) | 1.48<br>(0.16)  | 0.29<br>(0.78)  | 2.20<br>(6.13)  | -4.91<br>(13.35) | -0.33<br>(5.00) | 5.59<br>(3.07) | 8.89<br>(10.93) | 3.93<br>(2.94) | 0.87 | 0.45 | 0.87 | 0.83 (0.58-0.94) | 0.41 (-0.05-0.74) | 0.87 (0.68-0.95) |
| Right temporal pole                            | 2.67<br>(0.32)  | 2.66<br>(0.29)  | 2.62<br>(0.34)  | 2.64<br>(0.29)  | 12.17 | 10.92 | 12.84 | 10.83 | 0.02<br>(0.99)  | 1.36<br>(0.19)  | 0.47<br>(0.64)  | 0.15<br>(8.36)  | -1.76<br>(5.33)  | -0.71<br>(8.34) | 5.63<br>(6.01) | 4.03<br>(3.79)  | 5.65<br>(6.00) | 0.80 | 0.92 | 0.80 | 0.80 (0.52-0.93) | 0.91 (0.78-0.97)  | 0.80 (0.52-0.93) |
| Right transverse temporal gyrus                | 1.09<br>(0.20)  | 1.07<br>(0.19)  | 1.08<br>(0.19)  | 1.09<br>(0.21)  | 18.06 | 18.14 | 17.85 | 19.15 | 1.16<br>(0.27)  | 0.41<br>(0.69)  | -0.20<br>(0.84) | -1.30<br>(4.37) | -0.27<br>(2.95)  | 0.00<br>(3.56)  | 3.51<br>(2.79) | 2.32<br>(1.75)  | 2.62<br>(2.31) | 0.97 | 0.98 | 0.98 | 0.97 (0.92-0.99) | 0.99 (0.96-0.99)  | 0.98 (0.95-0.99) |
| Right insula                                   | 7.55<br>(0.91)  | 7.44<br>(0.82)  | 7.51<br>(0.96)  | 7.47<br>(0.92)  | 12.10 | 10.97 | 12.79 | 12.28 | 1.43<br>(0.17)  | 0.94<br>(0.36)  | 1.46<br>(0.16)  | -1.27<br>(3.79) | -0.53<br>(1.95)  | -1.11<br>(2.77) | 2.85<br>(2.72) | 1.55<br>(1.24)  | 2.42<br>(1.66) | 0.95 | 0.99 | 0.97 | 0.94 (0.84-0.98) | 0.99 (0.97-1.00)  | 0.97 (0.91-0.99) |
| <b>Local cortical surface (cm<sup>2</sup>)</b> |                 |                 |                 |                 |       |       |       |       |                 |                 |                 |                 |                  |                 |                |                 |                |      |      |      |                  |                   |                  |
| Left banks superior temporal sulcus            | 10.73<br>(1.96) | 10.64<br>(1.83) | 10.67<br>(2.00) | 10.52<br>(1.77) | 18.24 | 17.22 | 18.75 | 16.81 | 1.02<br>(0.32)  | 0.64<br>(0.53)  | 2.21<br>(0.04)  | -0.62<br>(2.89) | -0.64<br>(3.12)  | -1.78<br>(3.20) | 2.47<br>(1.50) | 2.12<br>(2.32)  | 3.06<br>(1.91) | 0.99 | 0.98 | 0.98 | 0.99 (0.96-0.99) | 0.98 (0.95-0.99)  | 0.97 (0.91-0.99) |
| Left caudal anterior cingulate cortex          | 6.99<br>(1.84)  | 6.92<br>(1.81)  | 6.97<br>(1.82)  | 6.98<br>(1.74)  | 26.35 | 26.20 | 26.11 | 24.92 | 1.48<br>(0.16)  | 0.32<br>(0.75)  | 0.35<br>(0.73)  | -0.98<br>(2.48) | -0.25<br>(3.46)  | 0.13<br>(2.45)  | 2.30<br>(1.24) | 2.60<br>(2.21)  | 1.69<br>(1.72) | 1.00 | 0.99 | 1.00 | 0.99 (0.99-1.00) | 0.99 (0.98-1.00)  | 1.00 (0.99-1.00) |
| Left caudal middle frontal gyrus               | 24.06<br>(3.51) | 23.97<br>(3.38) | 24.11<br>(3.43) | 24.20<br>(3.44) | 14.60 | 14.10 | 14.22 | 14.22 | 1.15<br>(0.27)  | -0.58<br>(0.57) | -1.36<br>(0.19) | -0.32<br>(1.28) | 0.24<br>(1.21)   | 0.59<br>(1.57)  | 1.06<br>(0.74) | 0.91<br>(0.81)  | 1.41<br>(0.84) | 1.00 | 1.00 | 0.99 | 1.00 (0.99-1.00) | 1.00 (0.99-1.00)  | 0.99 (0.98-1.00) |
| Left cuneus                                    | 16.57<br>(2.40) | 16.51<br>(2.40) | 16.54<br>(2.41) | 16.65<br>(2.67) | 14.49 | 14.56 | 14.59 | 16.05 | 0.59<br>(0.56)  | 0.30<br>(0.77)  | -0.58<br>(0.57) | -0.36<br>(2.20) | -0.18<br>(2.31)  | 0.30<br>(2.94)  | 1.67<br>(1.41) | 1.91<br>(1.22)  | 2.00<br>(2.11) | 0.99 | 0.99 | 0.98 | 0.99 (0.96-1.00) | 0.99 (0.96-1.00)  | 0.98 (0.93-0.99) |
| Left entorhinal cortex                         | 4.47<br>(0.80)  | 4.46<br>(0.76)  | 4.47<br>(0.72)  | 4.52<br>(0.88)  | 17.98 | 17.06 | 15.98 | 19.52 | 0.13<br>(0.90)  | -0.06<br>(0.96) | -0.72<br>(0.48) | -0.11<br>(8.48) | 0.45<br>(9.38)   | 1.01<br>(6.73)  | 6.50<br>(5.18) | 7.28<br>(5.62)  | 5.63<br>(3.54) | 0.90 | 0.83 | 0.94 | 0.90 (0.74-0.96) | 0.84 (0.59-0.94)  | 0.93 (0.83-0.98) |
| Left fusiform gyrus                            | 33.50<br>(4.76) | 33.40<br>(4.70) | 33.37<br>(4.73) | 33.49<br>(4.84) | 14.20 | 14.09 | 14.17 | 14.44 | 0.72<br>(0.48)  | 1.11<br>(0.28)  | 0.13<br>(0.90)  | -0.30<br>(1.88) | -0.40<br>(1.54)  | -0.07<br>(1.29) | 1.43<br>(1.19) | 1.31<br>(0.84)  | 1.04<br>(0.72) | 0.99 | 0.99 | 1.00 | 0.99 (0.98-1.00) | 0.99 (0.99-1.00)  | 1.00 (0.99-1.00) |
| Left inferior parietal cortex                  | 48.10<br>(7.38) | 47.97<br>(7.59) | 48.06<br>(7.65) | 48.31<br>(7.33) | 15.35 | 15.83 | 15.93 | 15.17 | 1.04<br>(0.31)  | 0.29<br>(0.78)  | -1.44<br>(0.17) | -0.36<br>(1.12) | -0.20<br>(1.45)  | 0.43<br>(1.07)  | 0.88<br>(0.76) | 1.07<br>(0.96)  | 0.81<br>(0.81) | 1.00 | 1.00 | 1.00 | 1.00 (0.99-1.00) | 1.00 (0.99-1.00)  | 1.00 (0.99-1.00) |
| Left inferior temporal gyrus                   | 35.51<br>(5.18) | 35.61<br>(5.42) | 35.61<br>(5.23) | 35.48<br>(5.27) | 14.58 | 15.23 | 14.69 | 14.86 | -0.50<br>(0.63) | -0.67<br>(0.52) | 0.20<br>(0.85)  | 0.18<br>(2.06)  | 0.24<br>(1.65)   | -0.11<br>(1.73) | 1.54<br>(1.32) | 1.25<br>(1.06)  | 1.49<br>(0.80) | 0.99 | 0.99 | 0.99 | 0.99 (0.97-1.00) | 0.99 (0.98-1.00)  | 0.99 (0.98-1.00) |
| Left isthmus cingulate cortex                  | 10.67<br>(1.72) | 10.73<br>(1.80) | 10.73<br>(1.92) | 10.73<br>(1.80) | 16.10 | 16.78 | 17.87 | 16.73 | -0.71<br>(0.49) | -0.83<br>(0.42) | -0.90<br>(0.38) | 0.47<br>(3.28)  | 0.37<br>(2.68)   | 0.56<br>(2.82)  | 2.54<br>(2.02) | 2.02<br>(1.72)  | 2.20<br>(1.76) | 0.98 | 0.99 | 0.99 | 0.98 (0.95-0.99) | 0.98 (0.96-0.99)  | 0.99 (0.96-0.99) |
| Left lateral occipital cortex                  | 52.89<br>(9.37) | 52.67<br>(9.05) | 52.75<br>(9.41) | 52.73<br>(9.25) | 17.71 | 17.19 | 17.84 | 17.54 | 1.12<br>(0.28)  | 0.77<br>(0.46)  | 1.39<br>(0.18)  | -0.35<br>(1.33) | -0.28<br>(1.47)  | -0.28<br>(0.87) | 1.05<br>(0.85) | 1.13<br>(0.95)  | 0.72<br>(0.53) | 1.00 | 1.00 | 1.00 | 1.00 (0.99-1.00) | 1.00 (0.99-1.00)  | 1.00 (1.00-1.00) |
| Left lateral orbitofrontal cortex              | 27.74<br>(3.67) | 27.89<br>(3.45) | 27.74<br>(3.75) | 27.94<br>(3.74) | 13.23 | 12.39 | 13.52 | 13.40 | -0.96<br>(0.35) | -0.01<br>(0.99) | -1.95<br>(0.07) | 0.63<br>(2.21)  | -0.04<br>(1.50)  | 0.69<br>(1.44)  | 1.78<br>(1.39) | 1.13<br>(0.93)  | 1.25<br>(0.96) | 0.99 | 0.99 | 0.99 | 0.99 (0.96-0.99) | 0.99 (0.99-1.00)  | 0.99 (0.98-1.00) |
| Left lingual gyrus                             | 32.10<br>(4.53) | 32.28<br>(4.76) | 32.32<br>(4.71) | 32.37<br>(4.83) | 14.10 | 14.74 | 14.59 | 14.92 | -1.42<br>(0.17) | -1.36<br>(0.19) | -1.82<br>(0.09) | 0.48<br>(1.38)  | 0.62<br>(1.86)   | 0.74<br>(1.79)  | 1.09<br>(0.94) | 1.52<br>(1.18)  | 1.52<br>(1.15) | 1.00 | 0.99 | 0.99 | 0.99 (0.98-1.00) | 0.99 (0.97-1.00)  | 0.99 (0.97-1.00) |
| Left medial orbitofrontal cortex               | 19.04<br>(3.23) | 18.59<br>(2.16) | 18.81<br>(3.12) | 19.20<br>(3.21) | 16.98 | 11.62 | 16.60 | 16.71 | 1.02<br>(0.32)  | 0.61<br>(0.55)  | -0.29<br>(0.77) | -1.69<br>(9.58) | -1.18<br>(7.69)  | 0.89<br>(11.62) | 7.94<br>(5.24) | 5.99<br>(4.73)  | 9.61<br>(6.10) | 0.86 | 0.89 | 0.77 | 0.79 (0.51-0.92) | 0.89 (0.72-0.96)  | 0.78 (0.48-0.92) |
| Left middle temporal gyrus                     | 32.69<br>(3.38) | 32.74<br>(3.21) | 32.82<br>(3.32) | 32.82<br>(3.53) | 10.34 | 9.81  | 10.12 | 10.75 | -0.36<br>(0.72) | -0.94<br>(0.36) | -1.18<br>(0.26) | 0.22<br>(1.83)  | 0.42<br>(1.71)   | 0.36<br>(1.39)  | 1.33<br>(1.22) | 1.43<br>(0.96)  | 1.00<br>(0.99) | 0.98 | 0.99 | 0.99 | 0.98 (0.96-0.99) | 0.99 (0.96-1.00)  | 0.99 (0.98-1.00) |
| Left parahippocampal gyrus                     | 6.97<br>(1.16)  | 6.94<br>(1.19)  | 6.89<br>(1.27)  | 6.97<br>(1.20)  | 16.65 | 17.17 | 18.51 | 17.24 | 0.38<br>(0.71)  | 1.23<br>(0.24)  | -0.08<br>(0.94) | -0.46<br>(4.29) | -1.41<br>(3.81)  | 0.01<br>(5.20)  | 3.22<br>(2.76) | 3.49<br>(1.90)  | 4.15<br>(2.94) | 0.97 | 0.98 | 0.95 | 0.97 (0.92-0.99) | 0.98 (0.94-0.99)  | 0.95 (0.87-0.98) |
| Left paracentral lobule                        | 14.06<br>(2.35) | 14.11<br>(2.38) | 14.07<br>(2.39) | 14.02<br>(2.35) | 16.74 | 16.87 | 17.00 | 16.73 | -1.08<br>(0.30) | -0.28<br>(0.78) | 0.71<br>(0.49)  | 0.38<br>(1.45)  | 0.06<br>(1.56)   | -0.26<br>(1.57) | 1.23<br>(0.80) | 1.06<br>(1.11)  | 1.20<br>(1.01) | 1.00 | 1.00 | 1.00 | 1.00 (0.99-1.00) | 1.00 (0.99-1.00)  | 1.00 (0.99-1.00) |
| Left pars opercularis                          | 17.21<br>(2.88) | 16.96<br>(2.86) | 16.98<br>(2.92) | 16.97<br>(2.72) | 16.76 | 16.83 | 17.18 | 16.00 | 2.08<br>(0.06)  | 2.06<br>(0.06)  | 1.99<br>(0.06)  | -1.44<br>(2.65) | -1.36<br>(2.59)  | -1.25<br>(2.65) | 2.70<br>(1.20) | 2.36<br>(1.66)  | 2.27<br>(1.77) | 0.99 | 0.99 | 0.99 | 0.98 (0.95-0.99) | 0.99 (0.96-1.00)  | 0.98 (0.95-0.99) |
| Left pars orbitalis                            | 7.33<br>(1.17)  | 7.35<br>(1.14)  | 7.36<br>(1.18)  | 7.37<br>(1.27)  | 16.01 | 15.53 | 16.07 | 17.21 | -0.25<br>(0.81) | -0.45<br>(0.66) | -0.67<br>(0.51) | 0.26<br>(3.54)  | 0.32<br>(2.77)   | 0.38<br>(3.47)  | 2.74<br>(2.15) | 2.13<br>(1.72)  | 2.90<br>(1.79) | 0.97 | 0.98 | 0.98 | 0.97 (0.93-0.99) | 0.98 (0.96-0.99)  | 0.98 (0.94-0.99) |
| Left pars triangularis                         | 14.32<br>(3.12) | 14.40<br>(3.09) | 14.34<br>(3.21) | 14.45<br>(3.08) | 21.79 | 21.49 | 22.38 | 21.31 | -1.19<br>(0.25) | -0.25<br>(0.80) | -1.48<br>(0.16) | 0.62<br>(1.93)  | 0.02<br>(2.17)   | 1.00<br>(2.29)  | 1.48<br>(1.34) | 1.63<br>(1.37)  | 2.01<br>(1.42) | 1.00 | 1.00 | 0.99 | 1.00 (0.99-1.00) | 1.00 (0.99-1.00)  | 0.99 (0.98-1.00) |
| Left pericalcarine cortex                      | 15.15<br>(2.94) | 15.22<br>(2.97) | 15.21<br>(2.95) | 15.21<br>(3.03) | 19.42 | 19.54 | 19.42 | 19.91 | -0.96<br>(0.35) | -0.69<br>(0.50) | -0.69<br>(0.50) | 0.52<br>(1.99)  | 0.38<br>(2.25)   | 0.32<br>(2.14)  | 1.69<br>(1.10) | 1.70<br>(1.46)  | 1.77<br>(1.17) | 0.99 | 0.99 | 0.99 | 0.99 (0.98-1.00) | 0.99 (0.98-1.00)  | 0.99 (0.98-1.00) |
| Left postcentral gyrus                         | 42.60<br>(5.03) | 42.74<br>(5.11) | 42.66<br>(5.12) | 42.72<br>(5.12) | 11.82 | 11.95 | 12.01 | 11.99 | -0.85<br>(0.41) | -0.64<br>(0.53) | -0.77<br>(0.46) | 0.30<br>(1.47)  | 0.13<br>(0.94)   | 0.26<br>(1.38)  | 1.07<br>(1.02) | 0.82<br>(0.44)  | 1.07<br>(0.87) | 0.99 | 1.00 | 0.99 | 0.99 (0.98-1.00) | 1.00 (0.99-1.00)  | 0.99 (0.98-1.00) |
| Left posterior cingulate cortex                | 12.75           |                 |                 |                 |       |       |       |       |                 |                 |                 |                 |                  |                 |                |                 |                |      |      |      |                  |                   |                  |

|                                         |                  |                  |                  |                  |       |       |       |       |                 |                 |                 |                 |                 |                 |                |                |                |      |      |      |                      |                      |                      |
|-----------------------------------------|------------------|------------------|------------------|------------------|-------|-------|-------|-------|-----------------|-----------------|-----------------|-----------------|-----------------|-----------------|----------------|----------------|----------------|------|------|------|----------------------|----------------------|----------------------|
| Left rostral middle frontal gyrus       | 58.22<br>(9.29)  | 58.57<br>(9.29)  | 58.51<br>(9.11)  | 58.86<br>(9.36)  | 15.96 | 15.86 | 15.57 | 15.91 | -1.41<br>(0.18) | -1.56<br>(0.14) | -2.77<br>(0.01) | 0.60<br>(1.62)  | 0.55<br>(1.44)  | 1.09<br>(1.60)  | 1.47<br>(0.83) | 0.96<br>(1.20) | 1.55<br>(1.13) | 0.99 | 1.00 | 1.00 | 0.99 (0.98-<br>1.00) | 1.00 (0.99-<br>1.00) | 0.99 (0.97-<br>1.00) |
| Left superior frontal gyrus             | 77.07<br>(9.71)  | 77.19<br>(9.63)  | 76.90<br>(9.82)  | 77.26<br>(9.64)  | 12.60 | 12.48 | 12.77 | 12.47 | -0.60<br>(0.56) | 0.93<br>(0.37)  | -1.16<br>(0.26) | 0.16<br>(0.99)  | -0.25<br>(0.93) | 0.26<br>(0.82)  | 0.77<br>(0.61) | 0.83<br>(0.44) | 0.66<br>(0.52) | 1.00 | 1.00 | 1.00 | 1.00 (0.99-<br>1.00) | 1.00 (0.99-<br>1.00) | 1.00 (0.99-<br>1.00) |
| Left superior parietal cortex           | 58.92<br>(6.15)  | 58.80<br>(6.18)  | 58.96<br>(6.23)  | 58.90<br>(6.38)  | 10.44 | 10.52 | 10.56 | 10.84 | 1.39<br>(0.19)  | -0.40<br>(0.69) | 0.20<br>(0.85)  | -0.23<br>(0.60) | 0.06<br>(0.67)  | -0.08<br>(0.75) | 0.55<br>(0.31) | 0.55<br>(0.37) | 0.63<br>(0.38) | 1.00 | 1.00 | 1.00 | 1.00 (0.99-<br>1.00) | 1.00 (0.99-<br>1.00) | 1.00 (0.99-<br>1.00) |
| Left superior temporal gyrus            | 38.37<br>(4.67)  | 38.68<br>(4.80)  | 38.54<br>(4.71)  | 38.70<br>(4.79)  | 12.17 | 12.40 | 12.21 | 12.39 | -2.97<br>(0.01) | -1.45<br>(0.17) | -2.23<br>(0.04) | 0.78<br>(1.08)  | 0.43<br>(1.24)  | 0.82<br>(1.50)  | 1.04<br>(0.81) | 0.92<br>(0.91) | 1.27<br>(1.12) | 1.00 | 1.00 | 0.99 | 0.99 (0.97-<br>1.00) | 0.99 (0.98-<br>1.00) | 0.99 (0.97-<br>1.00) |
| Left supramarginal gyrus                | 42.86<br>(6.42)  | 42.73<br>(6.34)  | 42.62<br>(6.39)  | 42.75<br>(6.54)  | 14.98 | 14.83 | 15.00 | 15.30 | 0.75<br>(0.46)  | 1.34<br>(0.20)  | 0.75<br>(0.46)  | -0.29<br>(1.51) | -0.55<br>(1.51) | -0.31<br>(1.34) | 1.09<br>(1.04) | 1.22<br>(1.01) | 1.07<br>(0.83) | 0.99 | 0.99 | 1.00 | 0.99 (0.98-<br>1.00) | 0.99 (0.98-<br>1.00) | 1.00 (0.99-<br>1.00) |
| Left frontal pole                       | 2.68<br>(0.20)   | 2.68<br>(0.26)   | 2.65<br>(0.22)   | 2.72<br>(0.25)   | 7.27  | 9.53  | 8.40  | 9.21  | 0.09<br>(0.93)  | 0.73<br>(0.48)  | -1.09<br>(0.29) | -0.28<br>(5.08) | -1.22<br>(6.68) | 1.25<br>(5.16)  | 3.98<br>(3.00) | 4.95<br>(4.48) | 4.31<br>(2.93) | 0.86 | 0.68 | 0.84 | 0.84 (0.59-<br>0.94) | 0.68 (0.30-<br>0.88) | 0.81 (0.55-<br>0.93) |
| Left temporal pole                      | 4.84<br>(0.44)   | 4.90<br>(0.37)   | 4.83<br>(0.34)   | 4.90<br>(0.36)   | 9.06  | 7.61  | 7.09  | 7.40  | -1.22<br>(0.24) | 0.12<br>(0.91)  | -1.00<br>(0.33) | 1.54<br>(4.81)  | 0.01<br>(4.61)  | 1.44<br>(5.26)  | 3.81<br>(3.18) | 3.05<br>(3.36) | 4.24<br>(3.29) | 0.85 | 0.86 | 0.81 | 0.84 (0.61-<br>0.94) | 0.84 (0.60-<br>0.94) | 0.80 (0.52-<br>0.92) |
| Left transverse temporal gyrus          | 4.46<br>(0.59)   | 4.47<br>(0.59)   | 4.48<br>(0.67)   | 4.48<br>(0.60)   | 13.23 | 13.16 | 14.86 | 13.32 | -0.19<br>(0.85) | -0.52<br>(0.61) | -0.68<br>(0.51) | 0.15<br>(3.71)  | 0.25<br>(3.59)  | 0.47<br>(2.99)  | 2.51<br>(2.66) | 2.75<br>(2.22) | 2.27<br>(1.93) | 0.96 | 0.97 | 0.98 | 0.97 (0.91-<br>0.99) | 0.97 (0.91-<br>0.99) | 0.98 (0.94-<br>0.99) |
| Left insula                             | 24.63<br>(3.08)  | 25.19<br>(4.27)  | 25.50<br>(3.38)  | 25.14<br>(3.10)  | 12.50 | 16.95 | 13.24 | 12.34 | -0.87<br>(0.40) | -1.85<br>(0.08) | -0.84<br>(0.41) | 1.65<br>(9.54)  | 3.35<br>(7.13)  | 1.99<br>(9.48)  | 6.81<br>(6.67) | 5.75<br>(5.24) | 8.05<br>(5.00) | 0.80 | 0.83 | 0.70 | 0.76 (0.45-<br>0.91) | 0.81 (0.53-<br>0.93) | 0.70 (0.34-<br>0.88) |
| Right banks superior temporal sulcus    | 9.18<br>(1.21)   | 9.23<br>(1.25)   | 9.34<br>(1.33)   | 9.28<br>(1.48)   | 13.13 | 13.57 | 14.26 | 15.95 | -1.15<br>(0.27) | -2.20<br>(0.04) | -1.14<br>(0.27) | 0.53<br>(2.01)  | 1.60<br>(3.24)  | 0.69<br>(3.41)  | 1.73<br>(1.07) | 3.06<br>(1.80) | 2.60<br>(2.23) | 0.99 | 0.98 | 0.99 | 0.99 (0.97-<br>1.00) | 0.97 (0.89-<br>0.99) | 0.97 (0.91-<br>0.99) |
| Right caudal anterior cingulate cortex  | 8.28<br>(2.09)   | 8.24<br>(2.01)   | 8.28<br>(2.01)   | 8.32<br>(2.13)   | 25.24 | 24.38 | 24.31 | 25.63 | 0.57<br>(0.58)  | 0.06<br>(0.95)  | -0.72<br>(0.48) | -0.25<br>(3.33) | 0.06<br>(4.70)  | 0.41<br>(2.99)  | 2.65<br>(1.92) | 3.15<br>(3.39) | 2.25<br>(1.93) | 0.99 | 0.98 | 0.99 | 0.99 (0.98-<br>1.00) | 0.98 (0.94-<br>0.99) | 0.99 (0.98-<br>1.00) |
| Right caudal middle frontal gyrus       | 23.13<br>(3.24)  | 23.11<br>(3.32)  | 23.14<br>(3.11)  | 23.06<br>(3.20)  | 14.03 | 14.38 | 13.42 | 13.89 | 0.19<br>(0.85)  | -0.16<br>(0.87) | 0.60<br>(0.56)  | -0.14<br>(1.88) | 0.16<br>(1.75)  | -0.27<br>(2.01) | 1.40<br>(1.21) | 1.34<br>(1.08) | 1.62<br>(1.15) | 0.99 | 0.99 | 0.99 | 0.99 (0.98-<br>1.00) | 0.99 (0.98-<br>1.00) | 0.99 (0.98-<br>1.00) |
| Right cuneus                            | 17.63<br>(3.02)  | 17.72<br>(3.20)  | 17.47<br>(2.92)  | 17.47<br>(3.02)  | 17.12 | 18.06 | 16.72 | 17.27 | -0.71<br>(0.49) | 1.59<br>(0.13)  | 2.34<br>(0.03)  | 0.33<br>(2.63)  | -0.86<br>(2.20) | -0.94<br>(1.56) | 1.85<br>(1.84) | 1.92<br>(1.30) | 1.36<br>(1.19) | 0.99 | 0.99 | 1.00 | 0.99 (0.97-<br>1.00) | 0.99 (0.97-<br>1.00) | 0.99 (0.98-<br>1.00) |
| Right entorhinal cortex                 | 4.12<br>(0.84)   | 4.03<br>(0.92)   | 4.07<br>(0.89)   | 4.08<br>(0.92)   | 20.40 | 22.84 | 21.93 | 22.51 | 1.21<br>(0.25)  | 0.92<br>(0.37)  | 0.52<br>(0.61)  | -2.60<br>(6.91) | -1.40<br>(4.52) | -1.24<br>(6.57) | 5.94<br>(4.16) | 3.60<br>(2.95) | 4.98<br>(4.29) | 0.95 | 0.98 | 0.95 | 0.95 (0.86-<br>0.98) | 0.98 (0.93-<br>0.99) | 0.95 (0.87-<br>0.98) |
| Right fusiform gyrus                    | 31.00<br>(6.02)  | 30.94<br>(5.76)  | 30.98<br>(5.54)  | 31.11<br>(6.04)  | 19.43 | 18.61 | 17.89 | 19.42 | 0.59<br>(0.57)  | 0.14<br>(0.89)  | -0.81<br>(0.43) | -0.09<br>(1.38) | 0.13<br>(1.98)  | 0.33<br>(1.78)  | 1.13<br>(0.74) | 1.61<br>(1.09) | 1.28<br>(1.24) | 1.00 | 1.00 | 1.00 | 1.00 (0.99-<br>1.00) | 0.99 (0.98-<br>1.00) | 1.00 (0.99-<br>1.00) |
| Right inferior parietal cortex          | 55.65<br>(7.98)  | 55.67<br>(7.94)  | 55.56<br>(8.24)  | 55.35<br>(8.06)  | 14.34 | 14.26 | 14.84 | 14.56 | -0.16<br>(0.87) | 0.60<br>(0.56)  | 1.46<br>(0.17)  | 0.06<br>(1.08)  | -0.22<br>(1.05) | -0.56<br>(1.48) | 0.86<br>(0.62) | 0.85<br>(0.61) | 0.89<br>(1.29) | 1.00 | 1.00 | 0.99 | 1.00 (0.99-<br>1.00) | 1.00 (0.99-<br>1.00) | 0.99 (0.98-<br>1.00) |
| Right inferior temporal gyrus           | 33.69<br>(4.38)  | 33.78<br>(4.36)  | 33.80<br>(4.26)  | 33.54<br>(4.31)  | 13.00 | 12.90 | 12.62 | 12.86 | -0.95<br>(0.36) | -0.88<br>(0.39) | 1.16<br>(0.27)  | 0.27<br>(1.12)  | 0.39<br>(1.62)  | -0.42<br>(1.55) | 0.92<br>(0.66) | 1.48<br>(0.67) | 1.24<br>(0.97) | 1.00 | 0.99 | 0.99 | 1.00 (0.99-<br>1.00) | 0.99 (0.98-<br>1.00) | 0.99 (0.98-<br>1.00) |
| Right isthmus cingulate cortex          | 9.66<br>(1.80)   | 9.71<br>(2.08)   | 9.74<br>(1.96)   | 9.76<br>(2.06)   | 18.67 | 21.38 | 20.13 | 21.06 | -0.58<br>(0.57) | -1.24<br>(0.23) | -1.26<br>(0.23) | 0.23<br>(3.39)  | 0.61<br>(2.59)  | 0.77<br>(2.72)  | 2.65<br>(2.02) | 2.17<br>(1.44) | 2.03<br>(1.91) | 0.99 | 0.99 | 0.99 | 0.98 (0.95-<br>0.99) | 0.99 (0.97-<br>1.00) | 0.98 (0.96-<br>0.99) |
| Right lateral occipital cortex          | 52.98<br>(11.06) | 52.79<br>(10.92) | 52.87<br>(11.21) | 52.80<br>(11.02) | 20.87 | 20.68 | 21.21 | 20.88 | 1.07<br>(0.30)  | 0.67<br>(0.51)  | 0.98<br>(0.34)  | -0.34<br>(1.38) | -0.29<br>(1.23) | -0.34<br>(1.33) | 1.12<br>(0.85) | 1.06<br>(0.62) | 1.07<br>(0.83) | 1.00 | 1.00 | 1.00 | 1.00 (0.99-<br>1.00) | 1.00 (1.00-<br>1.00) | 1.00 (0.99-<br>1.00) |
| Right lateral orbitofrontal cortex      | 28.24<br>(3.86)  | 29.09<br>(4.30)  | 28.04<br>(4.01)  | 28.63<br>(3.27)  | 13.67 | 14.77 | 14.29 | 11.43 | -2.09<br>(0.05) | 0.60<br>(0.56)  | -1.22<br>(0.24) | 2.82<br>(5.59)  | -0.82<br>(4.78) | 1.61<br>(4.56)  | 4.95<br>(3.67) | 3.55<br>(3.18) | 3.39<br>(3.37) | 0.93 | 0.94 | 0.95 | 0.90 (0.72-<br>0.97) | 0.94 (0.84-<br>0.98) | 0.94 (0.83-<br>0.98) |
| Right lingual gyrus                     | 34.07<br>(5.11)  | 34.03<br>(5.18)  | 34.05<br>(5.17)  | 34.04<br>(4.98)  | 14.98 | 15.21 | 15.20 | 14.64 | 0.43<br>(0.68)  | 0.30<br>(0.77)  | 0.23<br>(0.82)  | -0.16<br>(1.29) | -0.10<br>(1.02) | -0.05<br>(1.78) | 0.96<br>(0.84) | 0.83<br>(0.56) | 1.50<br>(0.88) | 1.00 | 1.00 | 0.99 | 1.00 (0.99-<br>1.00) | 1.00 (0.99-<br>1.00) | 0.99 (0.98-<br>1.00) |
| Right medial orbitofrontal cortex       | 20.64<br>(2.52)  | 20.24<br>(2.53)  | 20.62<br>(2.77)  | 20.86<br>(2.77)  | 12.21 | 12.50 | 13.44 | 13.27 | 1.96<br>(0.07)  | 0.10<br>(0.92)  | -1.23<br>(0.24) | -1.97<br>(4.03) | -0.22<br>(3.99) | 0.96<br>(3.38)  | 2.94<br>(3.34) | 2.67<br>(2.89) | 2.69<br>(2.16) | 0.95 | 0.95 | 0.97 | 0.94 (0.82-<br>0.98) | 0.95 (0.86-<br>0.98) | 0.96 (0.89-<br>0.99) |
| Right middle temporal gyrus             | 35.50<br>(3.93)  | 35.52<br>(3.94)  | 35.35<br>(4.10)  | 35.50<br>(3.97)  | 11.06 | 11.09 | 11.59 | 11.18 | -0.11<br>(0.92) | 1.48<br>(0.16)  | 0.00<br>(1.00)  | 0.03<br>(1.09)  | -0.48<br>(1.17) | -0.01<br>(1.33) | 0.80<br>(0.71) | 0.99<br>(0.76) | 1.02<br>(0.80) | 0.99 | 1.00 | 0.99 | 1.00 (0.99-<br>1.00) | 0.99 (0.98-<br>1.00) | 0.99 (0.98-<br>1.00) |
| Right parahippocampal gyrus             | 6.29<br>(1.22)   | 6.34<br>(1.05)   | 6.37<br>(1.26)   | 6.38<br>(1.15)   | 19.33 | 16.64 | 19.74 | 18.06 | -0.77<br>(0.45) | -1.75<br>(0.10) | -1.56<br>(0.14) | 1.22<br>(3.99)  | 1.12<br>(2.85)  | 1.64<br>(3.91)  | 3.26<br>(2.48) | 2.48<br>(1.69) | 2.95<br>(2.98) | 0.98 | 0.99 | 0.98 | 0.97 (0.93-<br>0.99) | 0.99 (0.97-<br>1.00) | 0.98 (0.94-<br>0.99) |
| Right paracentral lobule                | 15.83<br>(2.08)  | 15.88<br>(2.23)  | 15.84<br>(2.10)  | 15.84<br>(2.05)  | 13.13 | 14.03 | 13.23 | 12.96 | -0.62<br>(0.55) | -0.14<br>(0.89) | -0.17<br>(0.87) | 0.18<br>(1.74)  | 0.05<br>(1.52)  | 0.08<br>(1.31)  | 1.35<br>(1.05) | 1.19<br>(0.88) | 1.09<br>(0.67) | 0.99 | 0.99 | 1.00 | 0.99 (0.98-<br>1.00) | 0.99 (0.98-<br>1.00) | 1.00 (0.99-<br>1.00) |
| Right pars opercularis                  | 15.47<br>(2.01)  | 15.51<br>(1.90)  | 15.31<br>(1.95)  | 15.52<br>(2.00)  | 13.02 | 12.26 | 12.76 | 12.89 | -0.32<br>(0.76) | 2.49<br>(0.02)  | -0.44<br>(0.67) | 0.34<br>(3.08)  | -1.03<br>(1.73) | 0.33<br>(2.89)  | 2.61<br>(1.54) | 1.68<br>(1.06) | 2.38<br>(1.57) | 0.97 | 0.99 | 0.97 | 0.97 (0.92-<br>0.99) | 0.99 (0.95-<br>1.00) | 0.97 (0.93-<br>0.99) |
| Right pars orbitalis                    | 8.90<br>(1.43)   | 8.90<br>(1.43)   | 8.90<br>(1.54)   | 8.90<br>(1.52)   | 16.01 | 16.12 | 17.27 | 17.10 | 0.06<br>(0.95)  | 0.06<br>(0.95)  | 0.04<br>(0.97)  | -0.05<br>(2.41) | -0.21<br>(2.37) | -0.17<br>(2.69) | 1.69<br>(1.67) | 2.02<br>(1.15) | 2.22<br>(1.42) | 0.99 | 0.99 | 0.99 | 0.99 (0.97-<br>1.00) | 0.99 (0.97-<br>1.00) | 0.99 (0.96-<br>1.00) |
| Right pars triangularis                 | 16.86<br>(2.91)  | 16.89<br>(3.11)  | 17.00<br>(3.05)  | 16.97<br>(2.98)  | 17.23 | 18.41 | 17.92 | 17.59 | -0.28<br>(0.78) | -1.75<br>(0.10) | -1.59<br>(0.13) | -0.02<br>(2.39) | 0.73<br>(1.88)  | 0.57<br>(1.58)  | 1.84<br>(1.45) | 1.34<br>(1.48) | 1.28<br>(1.06) | 0.99 | 0.99 | 1.00 | 0.99 (0.98-<br>1.00) | 0.99 (0.98-<br>1.00) | 1.00 (0.99-<br>1.00) |
| Right pericalcarine cortex              | 17.05<br>(3.07)  | 17.10<br>(3.14)  | 16.85<br>(3.09)  | 16.95<br>(3.02)  | 17.99 | 18.39 | 18.36 | 17.81 | -0.52<br>(0.61) | 3.00<br>(0.01)  | 1.22<br>(0.24)  | 0.17<br>(2.06)  | -1.29<br>(1.87) | -0.59<br>(2.08) | 1.57<br>(1.29) | 1.64<br>(1.55) | 1.69<br>(1.28) | 0.99 | 1.00 | 0.99 | 0.99 (0.98-<br>1.00) | 0.99 (0.97-<br>1.00) | 0.99 (0.98-<br>1.00) |
| Right postcentral gyrus                 | 40.58<br>(3.23)  | 40.74<br>(3.08)  | 40.70<br>(3.24)  | 40.57<br>(3.24)  | 7.97  | 7.57  | 7.97  | 7.98  | -1.36<br>(0.19) | -1.31<br>(0.21) | 0.11<br>(0.92)  | 0.43<br>(1.20)  | 0.32<br>(0.99)  | -0.02<br>(0.76) | 0.92<br>(0.85) | 0.88<br>(0.52) | 0.61<br>(0.43) | 0.99 | 0.99 | 1.00 | 0.99 (0.97-<br>1.00) | 0.99 (0.98-<br>1.00) | 1.00 (0.99-<br>1.00) |
| Right posterior cingulate cortex        | 13.17<br>(1.94)  | 13.20<br>(2.04)  | 13.11<br>(1.98)  | 13.22<br>(2.04)  | 14.77 | 15.49 | 15.09 | 15.42 | -0.33<br>(0.74) | 0.78<br>(0.45)  | -0.95<br>(0.36) | 0.14<br>(2.57)  | -0.43<br>(2.10) | 0.30<br>(1.56)  | 2.10<br>(1.40) | 1.60<br>(1.37) | 1.30<br>(0.84) | 0.98 | 0.99 | 1.00 | 0.98 (0.95-<br>0.99) | 0.99 (0.97-<br>1.00) | 0.99 (0.98-<br>1.00) |
| Right precentral gyrus                  | 49.48<br>(5.68)  | 49.54<br>(5.90)  | 49.60<br>(5.89)  | 49.72<br>(5.70)  | 11.48 | 11.90 | 11.87 | 11.47 | -0.49<br>(0.63) | -1.00<br>(0.34) | -1.54<br>(0.14) | 0.08<br>(1.14)  | 0.20<br>(1.00)  | 0.48<br>(1.23)  | 0.88<br>(0.69) | 0.83<br>(0.56) | 1.02<br>(0.80) | 1.00 | 1.00 | 0.99 | 1.00 (0.99-<br>1.00) | 1.00 (0.99-<br>1.00) | 0.99 (0.98-<br>1.00) |
| Right precuneus                         | 41.22<br>(5.10)  | 41.08<br>(4.98)  | 41.16<br>(4.90)  | 41.01<br>(4.98)  | 12.36 | 12.13 | 11.92 | 12.14 | 1.20<br>(0.25)  | 0.49<br>(0.63)  | 1.65<br>(0.12)  | -0.32<br>(1.10) | -0.10<br>(1.17) | -0.48<br>(1.15) | 0.77<br>(0.83) | 0.94<br>(0.65) | 0.93<br>(0.81) | 1.00 | 1.00 | 1.00 | 1.00 (0.99-<br>1.00) | 1.00 (0.99-<br>1.00) | 0.99 (0.98-<br>1.00) |
| Right rostral anterior cingulate cortex | 6.90<br>(1.47)   | 6.94<br>(1.58)   | 6.84<br>(1.45)   | 6.91<br>(1.52)   | 21.35 | 22.80 | 21.25 | 22.01 | -0.57<br>(0.58) | 1.10<br>(0.29)  | -0.06<br>(0.95) | 0.27<br>(3.77)  | -0.88<br>(3.68) | -0.08<br>(2.94) | 2.81<br>(2.43) | 2.69<br>(2.58) | 2.19<br>(1.88) | 0.98 | 0.99 | 0.99 | 0.98 (0.95-<br>0.99) | 0.99 (0.97-<br>1.00) | 0.99 (0.98-<br>1.00) |
| Right rostral middle frontal gyrus      | 59.95<br>(8.74)  | 59.99<br>(8.53)  | 59.79<br>(8.79)  | 60.16<br>(8.69)  | 14.59 | 14.22 |       |       |                 |                 |                 |                 |                 |                 |                |                |                |      |      |      |                      |                      |                      |

|                                        |                 |                 |                 |                 |       |       |       |       |                 |                 |                 |                 |                 |                 |                |                |                |      |      |      |                  |                  |                  |
|----------------------------------------|-----------------|-----------------|-----------------|-----------------|-------|-------|-------|-------|-----------------|-----------------|-----------------|-----------------|-----------------|-----------------|----------------|----------------|----------------|------|------|------|------------------|------------------|------------------|
| Right temporal pole                    | 4.70<br>(0.44)  | 4.69<br>(0.54)  | 4.58<br>(0.47)  | 4.64<br>(0.55)  | 9.30  | 11.56 | 10.15 | 11.85 | 0.14<br>(0.89)  | 2.76<br>(0.01)  | 0.61<br>(0.55)  | -0.48<br>(7.15) | -2.55<br>(3.58) | -1.47<br>(8.02) | 5.35<br>(4.57) | 3.28<br>(2.87) | 5.94<br>(5.38) | 0.81 | 0.93 | 0.74 | 0.80 (0.51-0.93) | 0.91 (0.66-0.97) | 0.73 (0.38-0.90) |
| Right transverse temporal gyrus        | 3.35<br>(0.45)  | 3.33<br>(0.51)  | 3.34<br>(0.41)  | 3.35<br>(0.45)  | 13.37 | 15.36 | 12.39 | 13.49 | 0.51<br>(0.62)  | 0.30<br>(0.77)  | -0.08<br>(0.94) | -0.92<br>(5.26) | -0.15<br>(3.03) | 0.04<br>(3.99)  | 4.27<br>(3.03) | 2.17<br>(2.05) | 3.15<br>(2.31) | 0.94 | 0.97 | 0.96 | 0.94 (0.83-0.98) | 0.97 (0.92-0.99) | 0.96 (0.89-0.99) |
| Right insula                           | 23.57<br>(3.22) | 22.86<br>(2.71) | 23.64<br>(3.56) | 23.15<br>(2.99) | 13.67 | 11.86 | 15.08 | 12.91 | 1.83<br>(0.09)  | -0.46<br>(0.65) | 1.24<br>(0.24)  | -2.82<br>(6.17) | 0.11<br>(2.07)  | -1.71<br>(5.42) | 4.86<br>(4.63) | 1.45<br>(1.43) | 3.47<br>(4.43) | 0.88 | 0.99 | 0.91 | 0.85 (0.61-0.94) | 0.99 (0.96-1.00) | 0.90 (0.75-0.96) |
| <b>Local cortical thickness (mm)</b>   |                 |                 |                 |                 |       |       |       |       |                 |                 |                 |                 |                 |                 |                |                |                |      |      |      |                  |                  |                  |
| Left banks superior temporal sulcus    | 2.61<br>(0.14)  | 2.61<br>(0.14)  | 2.62<br>(0.14)  | 2.62<br>(0.14)  | 5.49  | 5.41  | 5.51  | 5.48  | 0.40<br>(0.69)  | -0.32<br>(0.75) | -1.30<br>(0.21) | -0.11<br>(1.18) | 0.14<br>(1.68)  | 0.49<br>(1.51)  | 0.99<br>(0.60) | 1.06<br>(1.27) | 1.27<br>(0.89) | 0.98 | 0.95 | 0.96 | 0.98 (0.94-0.99) | 0.95 (0.87-0.98) | 0.96 (0.89-0.99) |
| Left caudal anterior cingulate cortex  | 2.56<br>(0.16)  | 2.56<br>(0.19)  | 2.57<br>(0.20)  | 2.55<br>(0.20)  | 6.13  | 7.46  | 7.77  | 7.88  | -0.21<br>(0.83) | -0.49<br>(0.63) | 0.30<br>(0.77)  | 0.06<br>(2.68)  | 0.33<br>(3.47)  | -0.39<br>(3.66) | 2.03<br>(1.68) | 2.35<br>(2.50) | 2.59<br>(2.53) | 0.93 | 0.89 | 0.90 | 0.92 (0.79-0.97) | 0.87 (0.68-0.95) | 0.88 (0.68-0.95) |
| Left caudal middle frontal gyrus       | 2.43<br>(0.09)  | 2.43<br>(0.10)  | 2.43<br>(0.10)  | 2.42<br>(0.09)  | 3.66  | 4.23  | 4.32  | 3.78  | -0.04<br>(0.97) | -0.37<br>(0.71) | 0.22<br>(0.83)  | -0.01<br>(1.43) | 0.16<br>(1.94)  | -0.09<br>(1.51) | 1.06<br>(0.93) | 1.30<br>(1.41) | 1.13<br>(0.96) | 0.95 | 0.89 | 0.92 | 0.94 (0.84-0.98) | 0.89 (0.70-0.96) | 0.92 (0.78-0.97) |
| Left cuneus                            | 1.97<br>(0.11)  | 1.96<br>(0.10)  | 1.96<br>(0.11)  | 1.96<br>(0.11)  | 5.83  | 5.22  | 5.67  | 5.61  | 0.66<br>(0.52)  | 0.32<br>(0.75)  | 1.33<br>(0.20)  | -0.31<br>(2.03) | -0.13<br>(1.78) | -0.51<br>(1.53) | 1.47<br>(1.37) | 1.41<br>(1.04) | 1.21<br>(1.03) | 0.94 | 0.95 | 0.96 | 0.93 (0.83-0.98) | 0.96 (0.88-0.98) | 0.96 (0.90-0.99) |
| Left entorhinal cortex                 | 3.47<br>(0.34)  | 3.45<br>(0.34)  | 3.47<br>(0.35)  | 3.48<br>(0.36)  | 9.80  | 9.91  | 10.04 | 10.23 | 0.49<br>(0.63)  | -0.11<br>(0.91) | -0.42<br>(0.68) | -0.38<br>(3.14) | 0.08<br>(2.92)  | 0.38<br>(3.96)  | 2.53<br>(1.79) | 2.16<br>(1.89) | 2.79<br>(2.74) | 0.95 | 0.96 | 0.92 | 0.95 (0.87-0.98) | 0.96 (0.89-0.99) | 0.93 (0.80-0.97) |
| Left fusiform gyrus                    | 2.84<br>(0.12)  | 2.84<br>(0.12)  | 2.84<br>(0.12)  | 2.84<br>(0.12)  | 4.34  | 4.40  | 4.13  | 4.13  | -0.04<br>(0.97) | 0.06<br>(0.96)  | 0.15<br>(0.88)  | 0.01<br>(0.98)  | -0.01<br>(1.09) | -0.03<br>(1.05) | 0.71<br>(0.65) | 0.90<br>(0.56) | 0.86<br>(0.55) | 0.98 | 0.97 | 0.97 | 0.98 (0.94-0.99) | 0.97 (0.91-0.99) | 0.97 (0.92-0.99) |
| Left inferior parietal cortex          | 2.53<br>(0.08)  | 2.52<br>(0.08)  | 2.53<br>(0.07)  | 2.53<br>(0.08)  | 2.98  | 3.12  | 2.90  | 2.97  | 0.46<br>(0.65)  | -0.53<br>(0.60) | 0.12<br>(0.91)  | -0.13<br>(1.13) | 0.15<br>(1.11)  | -0.04<br>(1.44) | 0.83<br>(0.75) | 0.77<br>(0.79) | 1.05<br>(0.95) | 0.93 | 0.93 | 0.88 | 0.93 (0.83-0.98) | 0.93 (0.82-0.98) | 0.89 (0.71-0.96) |
| Left inferior temporal gyrus           | 2.74<br>(0.13)  | 2.73<br>(0.14)  | 2.73<br>(0.12)  | 2.73<br>(0.14)  | 4.69  | 5.26  | 4.43  | 5.21  | 1.11<br>(0.28)  | 0.25<br>(0.80)  | 0.75<br>(0.46)  | -0.40<br>(1.34) | -0.09<br>(1.76) | -0.34<br>(1.65) | 1.15<br>(0.75) | 1.41<br>(1.01) | 1.28<br>(1.05) | 0.97 | 0.93 | 0.94 | 0.96 (0.90-0.99) | 0.93 (0.82-0.98) | 0.94 (0.84-0.98) |
| Left isthmus cingulate cortex          | 2.53<br>(0.21)  | 2.51<br>(0.20)  | 2.55<br>(0.22)  | 2.52<br>(0.19)  | 8.40  | 8.07  | 8.53  | 7.71  | 0.74<br>(0.47)  | -1.58<br>(0.13) | 0.94<br>(0.36)  | -0.57<br>(3.00) | 0.72<br>(1.81)  | -0.40<br>(1.75) | 2.33<br>(1.88) | 1.37<br>(1.36) | 1.39<br>(1.09) | 0.93 | 0.98 | 0.98 | 0.93 (0.81-0.97) | 0.97 (0.93-0.99) | 0.97 (0.93-0.99) |
| Left lateral occipital cortex          | 2.25<br>(0.08)  | 2.26<br>(0.08)  | 2.25<br>(0.08)  | 2.25<br>(0.08)  | 3.39  | 3.64  | 3.56  | 3.73  | -0.98<br>(0.34) | -0.86<br>(0.40) | -0.72<br>(0.48) | 0.30<br>(1.27)  | 0.18<br>(0.87)  | 0.18<br>(1.08)  | 0.88<br>(0.94) | 0.72<br>(0.48) | 0.82<br>(0.70) | 0.94 | 0.97 | 0.96 | 0.93 (0.83-0.98) | 0.97 (0.91-0.99) | 0.96 (0.88-0.98) |
| Left lateral orbitofrontal cortex      | 2.60<br>(0.12)  | 2.59<br>(0.11)  | 2.60<br>(0.10)  | 2.60<br>(0.12)  | 4.44  | 4.42  | 3.88  | 4.49  | 0.67<br>(0.51)  | 0.07<br>(0.95)  | 0.18<br>(0.86)  | -0.22<br>(1.31) | -0.01<br>(1.86) | -0.09<br>(1.95) | 1.06<br>(0.76) | 1.38<br>(1.18) | 1.47<br>(1.23) | 0.96 | 0.91 | 0.90 | 0.96 (0.88-0.98) | 0.91 (0.76-0.97) | 0.91 (0.75-0.97) |
| Left lingual gyrus                     | 2.07<br>(0.12)  | 2.07<br>(0.12)  | 2.07<br>(0.12)  | 2.06<br>(0.11)  | 5.70  | 5.67  | 6.04  | 5.44  | 0.86<br>(0.40)  | 0.46<br>(0.65)  | 1.67<br>(0.12)  | -0.28<br>(1.33) | -0.29<br>(2.33) | -0.65<br>(1.59) | 1.04<br>(0.84) | 1.96<br>(1.20) | 1.45<br>(0.86) | 0.97 | 0.92 | 0.96 | 0.97 (0.93-0.99) | 0.93 (0.80-0.97) | 0.95 (0.87-0.98) |
| Left medial orbitofrontal cortex       | 2.39<br>(0.10)  | 2.37<br>(0.11)  | 2.38<br>(0.08)  | 2.38<br>(0.09)  | 4.05  | 4.75  | 3.45  | 3.79  | 1.80<br>(0.09)  | 0.62<br>(0.54)  | 0.69<br>(0.50)  | -1.17<br>(2.65) | -0.46<br>(3.17) | -0.37<br>(2.27) | 1.95<br>(2.11) | 2.47<br>(1.93) | 1.69<br>(1.50) | 0.84 | 0.67 | 0.84 | 0.81 (0.54-0.93) | 0.67 (0.27-0.87) | 0.84 (0.61-0.94) |
| Left middle temporal gyrus             | 2.80<br>(0.11)  | 2.80<br>(0.11)  | 2.80<br>(0.10)  | 2.80<br>(0.10)  | 4.02  | 4.10  | 3.53  | 3.65  | -0.40<br>(0.69) | -0.17<br>(0.87) | -0.18<br>(0.86) | 0.12<br>(1.30)  | 0.08<br>(1.59)  | 0.09<br>(1.81)  | 1.01<br>(0.79) | 1.20<br>(0.99) | 1.23<br>(1.29) | 0.95 | 0.92 | 0.90 | 0.95 (0.87-0.98) | 0.92 (0.78-0.97) | 0.90 (0.73-0.96) |
| Left parahippocampal gyrus             | 3.03<br>(0.24)  | 3.02<br>(0.23)  | 3.05<br>(0.25)  | 3.04<br>(0.24)  | 7.97  | 7.49  | 8.21  | 7.87  | 0.83<br>(0.42)  | -1.20<br>(0.25) | -0.24<br>(0.81) | -0.31<br>(1.62) | 0.51<br>(1.66)  | 0.11<br>(1.74)  | 1.23<br>(1.06) | 1.34<br>(1.06) | 1.34<br>(1.07) | 0.98 | 0.98 | 0.98 | 0.98 (0.94-0.99) | 0.98 (0.93-0.99) | 0.98 (0.94-0.99) |
| Left paracentral lobule                | 2.50<br>(0.10)  | 2.50<br>(0.12)  | 2.51<br>(0.12)  | 2.51<br>(0.12)  | 4.11  | 4.84  | 4.95  | 4.67  | 0.21<br>(0.84)  | -0.62<br>(0.54) | -0.84<br>(0.42) | -0.13<br>(1.96) | 0.24<br>(1.76)  | 0.37<br>(1.88)  | 1.35<br>(1.38) | 1.42<br>(1.01) | 1.64<br>(0.90) | 0.92 | 0.94 | 0.92 | 0.91 (0.76-0.97) | 0.93 (0.81-0.97) | 0.91 (0.77-0.97) |
| Left pars opercularis                  | 2.51<br>(0.11)  | 2.50<br>(0.11)  | 2.51<br>(0.11)  | 2.51<br>(0.10)  | 4.39  | 4.49  | 4.46  | 4.00  | 1.06<br>(0.30)  | 0.02<br>(0.98)  | -0.07<br>(0.95) | -0.35<br>(1.30) | -0.01<br>(1.48) | 0.06<br>(2.33)  | 1.15<br>(0.65) | 1.20<br>(0.81) | 1.52<br>(1.72) | 0.96 | 0.94 | 0.86 | 0.96 (0.88-0.98) | 0.95 (0.86-0.98) | 0.86 (0.65-0.95) |
| Left pars orbitalis                    | 2.62<br>(0.14)  | 2.62<br>(0.14)  | 2.61<br>(0.13)  | 2.61<br>(0.13)  | 5.34  | 5.51  | 4.95  | 5.15  | -0.21<br>(0.84) | 0.76<br>(0.46)  | 0.51<br>(0.62)  | 0.11<br>(2.20)  | -0.36<br>(2.01) | -0.24<br>(1.95) | 1.54<br>(1.53) | 1.67<br>(1.08) | 1.62<br>(1.03) | 0.91 | 0.93 | 0.93 | 0.92 (0.78-0.97) | 0.93 (0.80-0.97) | 0.93 (0.82-0.98) |
| Left pars triangularis                 | 2.39<br>(0.13)  | 2.39<br>(0.14)  | 2.39<br>(0.13)  | 2.40<br>(0.13)  | 5.44  | 5.90  | 5.30  | 5.45  | 0.48<br>(0.64)  | 0.42<br>(0.68)  | -0.49<br>(0.63) | -0.23<br>(1.70) | -0.17<br>(1.76) | 0.18<br>(1.45)  | 1.27<br>(1.11) | 1.19<br>(1.27) | 0.94<br>(1.10) | 0.96 | 0.95 | 0.97 | 0.96 (0.88-0.98) | 0.95 (0.87-0.98) | 0.97 (0.91-0.99) |
| Left pericalcarine cortex              | 1.64<br>(0.12)  | 1.64<br>(0.12)  | 1.65<br>(0.12)  | 1.63<br>(0.14)  | 7.05  | 7.49  | 7.26  | 8.37  | 0.24<br>(0.81)  | -0.47<br>(0.65) | 1.05<br>(0.31)  | -0.18<br>(2.41) | 0.36<br>(3.10)  | -0.99<br>(3.27) | 1.97<br>(1.30) | 2.59<br>(1.61) | 2.66<br>(2.04) | 0.95 | 0.91 | 0.91 | 0.95 (0.86-0.98) | 0.91 (0.76-0.97) | 0.90 (0.75-0.96) |
| Left postcentral gyrus                 | 2.12<br>(0.09)  | 2.11<br>(0.09)  | 2.12<br>(0.09)  | 2.11<br>(0.08)  | 4.34  | 4.04  | 4.22  | 3.90  | 1.36<br>(0.19)  | -0.15<br>(0.88) | 0.80<br>(0.44)  | -0.44<br>(1.31) | 0.05<br>(1.35)  | -0.26<br>(1.36) | 1.13<br>(0.73) | 1.02<br>(0.84) | 1.19<br>(0.65) | 0.95 | 0.95 | 0.95 | 0.95 (0.86-0.98) | 0.95 (0.87-0.98) | 0.95 (0.86-0.98) |
| Left posterior cingulate cortex        | 2.52<br>(0.11)  | 2.53<br>(0.11)  | 2.53<br>(0.11)  | 2.52<br>(0.11)  | 4.37  | 4.49  | 4.37  | 4.44  | -1.18<br>(0.26) | -2.09<br>(0.05) | -0.58<br>(0.57) | 0.38<br>(1.30)  | 0.59<br>(1.12)  | 0.20<br>(1.39)  | 1.10<br>(0.73) | 0.97<br>(0.79) | 1.08<br>(0.85) | 0.96 | 0.97 | 0.95 | 0.96 (0.88-0.98) | 0.96 (0.87-0.99) | 0.95 (0.87-0.98) |
| Left precentral gyrus                  | 2.58<br>(0.11)  | 2.58<br>(0.10)  | 2.59<br>(0.09)  | 2.58<br>(0.09)  | 4.08  | 3.82  | 3.33  | 3.52  | 0.65<br>(0.53)  | -0.67<br>(0.51) | -0.25<br>(0.81) | -0.17<br>(1.12) | 0.28<br>(1.58)  | 0.10<br>(1.27)  | 0.91<br>(0.63) | 1.03<br>(1.19) | 1.06<br>(0.66) | 0.96 | 0.93 | 0.96 | 0.96 (0.90-0.99) | 0.92 (0.78-0.97) | 0.95 (0.86-0.98) |
| Left precuneus                         | 2.51<br>(0.07)  | 2.51<br>(0.07)  | 2.52<br>(0.08)  | 2.51<br>(0.07)  | 2.96  | 2.76  | 3.16  | 2.93  | 0.26<br>(0.80)  | -1.34<br>(0.20) | -0.55<br>(0.59) | -0.06<br>(0.94) | 0.33<br>(0.98)  | 0.14<br>(1.03)  | 0.71<br>(0.59) | 0.70<br>(0.74) | 0.84<br>(0.58) | 0.95 | 0.95 | 0.94 | 0.95 (0.86-0.98) | 0.94 (0.85-0.98) | 0.94 (0.85-0.98) |
| Left rostral anterior cingulate cortex | 2.88<br>(0.25)  | 2.89<br>(0.25)  | 2.87<br>(0.23)  | 2.86<br>(0.22)  | 8.65  | 8.71  | 8.11  | 7.61  | -0.56<br>(0.58) | 0.40<br>(0.69)  | 0.88<br>(0.40)  | 0.38<br>(2.91)  | -0.31<br>(3.49) | -0.45<br>(2.29) | 2.35<br>(1.64) | 2.88<br>(1.86) | 1.56<br>(1.68) | 0.95 | 0.92 | 0.97 | 0.95 (0.87-0.98) | 0.92 (0.79-0.97) | 0.96 (0.89-0.98) |
| Left rostral middle frontal gyrus      | 2.24<br>(0.09)  | 2.23<br>(0.09)  | 2.23<br>(0.08)  | 2.23<br>(0.09)  | 3.96  | 4.02  | 3.79  | 3.94  | 1.19<br>(0.25)  | 0.70<br>(0.49)  | 0.57<br>(0.58)  | -0.38<br>(1.27) | -0.22<br>(1.32) | -0.15<br>(1.04) | 1.07<br>(0.73) | 1.06<br>(0.77) | 0.82<br>(0.62) | 0.95 | 0.94 | 0.96 | 0.95 (0.86-0.98) | 0.94 (0.85-0.98) | 0.97 (0.91-0.99) |
| Left superior frontal gyrus            | 2.62<br>(0.09)  | 2.62<br>(0.11)  | 2.61<br>(0.09)  | 2.62<br>(0.11)  | 3.43  | 4.35  | 3.43  | 4.21  | -0.10<br>(0.92) | 0.89<br>(0.39)  | 0.03<br>(0.97)  | 0.01<br>(1.74)  | -0.34<br>(1.57) | -0.04<br>(1.97) | 1.25<br>(1.17) | 1.16<br>(1.07) | 1.41<br>(1.33) | 0.92 | 0.90 | 0.88 | 0.90 (0.74-0.96) | 0.90 (0.75-0.96) | 0.87 (0.66-0.95) |
| Left superior parietal cortex          | 2.23<br>(0.05)  | 2.23<br>(0.06)  | 2.23<br>(0.06)  | 2.24<br>(0.05)  | 2.16  | 2.46  | 2.57  | 2.33  | 0.11<br>(0.92)  | 0.02<br>(0.98)  | -0.20<br>(0.85) | -0.04<br>(1.18) | -0.02<br>(1.36) | 0.06<br>(1.20)  | 0.86<br>(0.77) | 0.97<br>(0.92) | 0.82<br>(0.85) | 0.88 | 0.85 | 0.86 | 0.88 (0.69-0.96) | 0.85 (0.61-0.94) | 0.87 (0.65-0.95) |
| Left superior temporal gyrus           | 2.82<br>(0.12)  | 2.81<br>(0.12)  | 2.82<br>(0.11)  | 2.82<br>(0.12)  | 4.30  | 4.25  | 3.94  | 4.37  | 0.47<br>(0.65)  | -0.04<br>(0.97) | -0.21<br>(0.84) | -0.15<br>(1.29) | 0.03<br>(1.48)  | 0.05<br>(1.00)  | 1.06<br>(0.69) | 1.11<br>(0.93) | 0.86<br>(0.46) | 0.96 | 0.94 | 0.97 | 0.96 (0.89-0.99) | 0.94 (0.84-0.98) | 0.97 (0.93-0.99) |
| Left supramarginal gyrus               | 2.54<br>(0.10)  | 2.54<br>(0.08)  | 2.55<br>(0.09)  | 2.54<br>(0.09)  | 3.81  | 3.32  | 3.48  | 3.41  | -0.41<br>(0.69) | -1.19<br>(0.25) | -0.48<br>(0.64) | 0.20<br>(1.81)  | 0.52<br>(1.69)  | 0.24<br>(1.86)  | 1.25<br>(1.29) | 1.41<br>(1.01) | 1.47<br>(1.11) | 0.88 | 0.90 | 0.87 | 0.88 (0.69-0.96) | 0.89 (0.72-0.96) | 0.87 (0.67-0.95) |
| Left frontal pole                      | 2.74<br>(0.28)  | 2.73<br>(0.23)  | 2.68<br>(0.20)  | 2.74<br>(0.26)  | 10.22 | 8.61  | 7.28  | 9.39  | 0.36<br>(0.73)  | 1.06<br>(0.31)  | -0.22<br>(0.83) | -0.18<br>(3.61) | -1.89<br>(7.82) | 0.28<br>(3.73)  | 2.85<br>(2.10) | 5.11<br>(6.09) | 2.92<br>(2.21) | 0.94 | 0.62 | 0.93 | 0.93 (0.82-0.98) | 0.58 (0.15-0.83) | 0.93 (0.82-0.98) |
| Left temporal pole                     | 3.75<br>(0.23)  | 3.73<br>(0.24)  | 3.74<br>(0.22)  | 3.75<br>(0.20)  | 6.13  | 6.42  | 5.87  | 5.27  | 1.18<br>(0.26)  | 0.67<br>(0.51)  | 0.20<br>(0.85)  | -0.70<br>(2.35) | -0.45<br>(2.81) | -0.06<br>(2.09) | 1.84<br>(1.56) | 2.29<br>(1.59) | 1.59<br>(1.29) | 0.93 | 0.90 | 0.94 | 0.93 (0.82-0.98) | 0.90 (0.74-0.96) | 0.94 (0.83-0.98) |
| Left transverse temporal gyrus         | 2.67<br>(0.15)  | 2.67<br>(0.16)  | 2.67<br>(0.13)  | 2.67<br>(0.15)  | 5.71  | 5.89  | 4.92  | 5.78  | -0.28<br>(0.78) | -0.16<br>(0.88) | -0.06<br>(0.96) | 0.09<br>(1.41)  | 0.11<br>(1.86)  | 0.02<br>(1.64)  | 1.21<br>(0.66) | 1.37<br>(1.21) |                |      |      |      |                  |                  |                  |



|                                         |                   |                   |                   |                   |       |       |      |       |                 |                 |                 |                 |                 |                 |                |                |                |      |      |      |                  |                   |                  |
|-----------------------------------------|-------------------|-------------------|-------------------|-------------------|-------|-------|------|-------|-----------------|-----------------|-----------------|-----------------|-----------------|-----------------|----------------|----------------|----------------|------|------|------|------------------|-------------------|------------------|
| Right caudal middle frontal gyrus       | 2.52<br>(0.09)    | 2.53<br>(0.09)    | 2.51<br>(0.10)    | 2.51<br>(0.10)    | 3.47  | 3.43  | 4.00 | 4.14  | -0.54<br>(0.60) | 0.90<br>(0.38)  | 0.99<br>(0.34)  | 0.22<br>(1.64)  | -0.47<br>(2.02) | -0.60<br>(2.33) | 1.40<br>(0.81) | 1.71<br>(1.09) | 1.87<br>(1.46) | 0.89 | 0.86 | 0.83 | 0.89 (0.72-0.96) | 0.86 (0.64-0.95)  | 0.81 (0.56-0.93) |
| Right cuneus                            | 2.01<br>(0.15)    | 2.00<br>(0.14)    | 2.01<br>(0.14)    | 2.01<br>(0.15)    | 7.70  | 7.21  | 6.97 | 7.36  | 0.64<br>(0.53)  | -0.57<br>(0.58) | -0.67<br>(0.52) | -0.23<br>(1.60) | 0.31<br>(1.82)  | 0.29<br>(1.62)  | 1.23<br>(1.00) | 1.54<br>(0.93) | 1.24<br>(1.03) | 0.98 | 0.97 | 0.98 | 0.98 (0.93-0.99) | 0.97 (0.92-0.99)  | 0.98 (0.94-0.99) |
| Right entorhinal cortex                 | 3.63<br>(0.37)    | 3.58<br>(0.36)    | 3.66<br>(0.34)    | 3.65<br>(0.39)    | 10.30 | 10.14 | 9.40 | 10.70 | 2.38<br>(0.03)  | -2.51<br>(0.02) | -0.86<br>(0.41) | -1.29<br>(2.20) | 0.95<br>(1.40)  | 0.44<br>(2.17)  | 2.06<br>(1.45) | 1.44<br>(0.83) | 1.54<br>(1.55) | 0.98 | 0.99 | 0.98 | 0.97 (0.90-0.99) | 0.99 (0.95-1.00)  | 0.98 (0.94-0.99) |
| Right fusiform gyrus                    | 2.84<br>(0.13)    | 2.84<br>(0.13)    | 2.84<br>(0.13)    | 2.84<br>(0.14)    | 4.55  | 4.60  | 4.71 | 4.91  | -0.33<br>(0.75) | -0.50<br>(0.62) | 0.09<br>(0.93)  | 0.11<br>(1.40)  | 0.16<br>(1.30)  | -0.04<br>(1.22) | 1.15<br>(0.74) | 1.04<br>(0.75) | 0.82<br>(0.87) | 0.95 | 0.96 | 0.97 | 0.96 (0.88-0.98) | 0.96 (0.90-0.99)  | 0.97 (0.91-0.99) |
| Right inferior parietal cortex          | 2.43<br>(0.06)    | 2.42<br>(0.08)    | 2.42<br>(0.06)    | 2.42<br>(0.07)    | 2.66  | 3.11  | 2.66 | 3.07  | 0.87<br>(0.40)  | 0.94<br>(0.36)  | 0.76<br>(0.46)  | -0.36<br>(1.60) | -0.34<br>(1.43) | -0.32<br>(1.63) | 1.34<br>(0.88) | 1.26<br>(0.69) | 1.30<br>(0.99) | 0.86 | 0.86 | 0.84 | 0.85 (0.63-0.94) | 0.86 (0.64-0.95)  | 0.84 (0.61-0.94) |
| Right inferior temporal gyrus           | 2.74<br>(0.12)    | 2.74<br>(0.11)    | 2.73<br>(0.11)    | 2.74<br>(0.12)    | 4.29  | 3.99  | 4.00 | 4.52  | -0.06<br>(0.95) | 1.27<br>(0.22)  | 0.17<br>(0.86)  | 0.04<br>(1.69)  | -0.54<br>(1.72) | -0.09<br>(1.76) | 1.34<br>(0.96) | 1.50<br>(0.93) | 1.20<br>(1.25) | 0.92 | 0.92 | 0.92 | 0.92 (0.80-0.97) | 0.91 (0.77-0.97)  | 0.92 (0.79-0.97) |
| Right isthmus cingulate cortex          | 2.55<br>(0.16)    | 2.56<br>(0.14)    | 2.55<br>(0.15)    | 2.55<br>(0.14)    | 6.29  | 5.56  | 5.79 | 5.58  | -0.84<br>(0.41) | 0.00<br>(1.00)  | -0.22<br>(0.83) | 0.45<br>(1.92)  | 0.03<br>(1.90)  | 0.16<br>(2.15)  | 1.55<br>(1.17) | 1.57<br>(0.99) | 1.81<br>(1.08) | 0.95 | 0.96 | 0.94 | 0.95 (0.86-0.98) | 0.96 (0.88-0.98)  | 0.94 (0.83-0.98) |
| Right lateral occipital cortex          | 2.29<br>(0.09)    | 2.28<br>(0.08)    | 2.28<br>(0.08)    | 2.28<br>(0.08)    | 3.75  | 3.55  | 3.44 | 3.59  | 0.68<br>(0.51)  | 1.50<br>(0.15)  | 1.62<br>(0.13)  | -0.19<br>(1.16) | -0.36<br>(0.96) | -0.42<br>(1.03) | 0.95<br>(0.66) | 0.84<br>(0.55) | 0.85<br>(0.68) | 0.95 | 0.97 | 0.96 | 0.95 (0.87-0.98) | 0.96 (0.89-0.99)  | 0.96 (0.88-0.98) |
| Right lateral orbitofrontal cortex      | 2.64<br>(0.11)    | 2.63<br>(0.09)    | 2.63<br>(0.10)    | 2.62<br>(0.12)    | 4.14  | 3.54  | 3.84 | 4.56  | 1.08<br>(0.30)  | 0.57<br>(0.58)  | 1.60<br>(0.13)  | -0.66<br>(2.57) | -0.41<br>(3.04) | -0.77<br>(1.89) | 2.21<br>(1.36) | 2.30<br>(1.95) | 1.60<br>(1.21) | 0.80 | 0.72 | 0.91 | 0.78 (0.49-0.92) | 0.73 (0.38-0.90)  | 0.90 (0.73-0.96) |
| Right lingual gyrus                     | 2.13<br>(0.09)    | 2.12<br>(0.08)    | 2.12<br>(0.09)    | 2.12<br>(0.08)    | 4.07  | 3.89  | 4.20 | 3.91  | 1.90<br>(0.08)  | 0.84<br>(0.42)  | 0.80<br>(0.44)  | -0.47<br>(1.01) | -0.25<br>(1.16) | -0.26<br>(1.37) | 0.89<br>(0.64) | 0.91<br>(0.73) | 1.04<br>(0.89) | 0.97 | 0.96 | 0.94 | 0.96 (0.89-0.99) | 0.96 (0.90-0.99)  | 0.94 (0.85-0.98) |
| Right medial orbitofrontal cortex       | 2.57<br>(0.08)    | 2.56<br>(0.06)    | 2.55<br>(0.09)    | 2.54<br>(0.09)    | 3.26  | 2.49  | 3.64 | 3.39  | 1.06<br>(0.31)  | 1.24<br>(0.23)  | 2.52<br>(0.02)  | -0.52<br>(2.02) | -0.92<br>(2.95) | -1.27<br>(2.06) | 1.68<br>(1.16) | 2.51<br>(1.70) | 1.96<br>(1.37) | 0.78 | 0.64 | 0.82 | 0.75 (0.44-0.91) | 0.63 (0.24-0.85)  | 0.77 (0.39-0.92) |
| Right middle temporal gyrus             | 2.86<br>(0.13)    | 2.86<br>(0.12)    | 2.84<br>(0.12)    | 2.83<br>(0.13)    | 4.61  | 4.33  | 4.27 | 4.51  | -0.24<br>(0.81) | 1.69<br>(0.11)  | 1.95<br>(0.07)  | 0.09<br>(1.35)  | -0.50<br>(1.24) | -0.91<br>(1.89) | 1.03<br>(0.83) | 1.01<br>(0.84) | 1.57<br>(1.36) | 0.96 | 0.97 | 0.92 | 0.96 (0.88-0.98) | 0.96 (0.88-0.99)  | 0.90 (0.73-0.97) |
| Right parahippocampal gyrus             | 2.99<br>(0.15)    | 2.99<br>(0.15)    | 3.01<br>(0.13)    | 3.00<br>(0.14)    | 4.90  | 4.91  | 4.43 | 4.71  | 0.53<br>(0.61)  | -0.86<br>(0.40) | -0.96<br>(0.35) | -0.15<br>(1.11) | 0.50<br>(2.18)  | 0.39<br>(1.60)  | 0.83<br>(0.72) | 1.82<br>(1.22) | 1.31<br>(0.95) | 0.97 | 0.89 | 0.95 | 0.98 (0.93-0.99) | 0.89 (0.71-0.96)  | 0.95 (0.86-0.98) |
| Right paracentral lobule                | 2.49<br>(0.13)    | 2.48<br>(0.13)    | 2.49<br>(0.12)    | 2.48<br>(0.12)    | 5.42  | 5.09  | 4.96 | 4.91  | 1.02<br>(0.32)  | -0.50<br>(0.63) | 0.56<br>(0.58)  | -0.29<br>(1.21) | 0.22<br>(1.58)  | -0.19<br>(1.52) | 1.06<br>(0.59) | 1.28<br>(0.91) | 1.22<br>(0.87) | 0.98 | 0.96 | 0.96 | 0.97 (0.93-0.99) | 0.95 (0.88-0.98)  | 0.96 (0.89-0.99) |
| Right pars opercularis                  | 2.61<br>(0.12)    | 2.61<br>(0.11)    | 2.59<br>(0.12)    | 2.59<br>(0.12)    | 4.44  | 4.32  | 4.57 | 4.47  | 0.11<br>(0.92)  | 1.71 (0.11)     | 2.35<br>(0.03)  | -0.03<br>(1.33) | -0.76<br>(1.74) | -0.76<br>(1.30) | 1.08<br>(0.73) | 1.52<br>(1.09) | 1.19<br>(0.90) | 0.95 | 0.92 | 0.96 | 0.96 (0.88-0.98) | 0.92 (0.77-0.97)  | 0.95 (0.82-0.98) |
| Right pars orbitalis                    | 2.67<br>(0.15)    | 2.67<br>(0.13)    | 2.66<br>(0.15)    | 2.66<br>(0.15)    | 5.71  | 5.03  | 5.59 | 5.82  | -0.37<br>(0.72) | 0.45<br>(0.66)  | 0.26<br>(0.80)  | 0.21<br>(1.96)  | -0.20<br>(1.81) | -0.13<br>(1.84) | 1.64<br>(1.01) | 1.41<br>(1.10) | 1.39<br>(1.16) | 0.94 | 0.95 | 0.95 | 0.94 (0.83-0.98) | 0.95 (0.86-0.98)  | 0.95 (0.86-0.98) |
| Right pars triangularis                 | 2.49<br>(0.11)    | 2.49<br>(0.10)    | 2.48<br>(0.10)    | 2.49<br>(0.11)    | 4.26  | 4.21  | 4.01 | 4.22  | 0.30<br>(0.77)  | 1.09<br>(0.29)  | 0.49<br>(0.63)  | -0.12<br>(1.59) | -0.41<br>(1.52) | -0.20<br>(1.67) | 1.33<br>(0.80) | 1.21<br>(0.96) | 1.43<br>(0.80) | 0.93 | 0.93 | 0.92 | 0.93 (0.82-0.98) | 0.93 (0.81-0.97)  | 0.93 (0.80-0.97) |
| Right pericalcarine cortex              | 1.67<br>(0.15)    | 1.67<br>(0.15)    | 1.68<br>(0.15)    | 1.68<br>(0.16)    | 8.99  | 9.01  | 9.19 | 9.51  | 0.01<br>(0.99)  | -0.69<br>(0.50) | -1.17<br>(0.26) | 0.00<br>(2.19)  | 0.31<br>(1.92)  | 0.68<br>(2.35)  | 1.80<br>(1.16) | 1.51<br>(1.15) | 1.98<br>(1.36) | 0.97 | 0.98 | 0.97 | 0.97 (0.92-0.99) | 0.98 (0.94-0.99)  | 0.96 (0.90-0.99) |
| Right postcentral gyrus                 | 2.10<br>(0.08)    | 2.09<br>(0.09)    | 2.09<br>(0.09)    | 2.09<br>(0.09)    | 3.97  | 4.28  | 4.07 | 4.46  | 1.15<br>(0.27)  | 0.75<br>(0.47)  | 1.16<br>(0.26)  | -0.33<br>(1.09) | -0.23<br>(1.15) | -0.37<br>(1.20) | 0.97<br>(0.53) | 0.84<br>(0.79) | 0.99<br>(0.75) | 0.97 | 0.96 | 0.96 | 0.96 (0.90-0.99) | 0.96 (0.88-0.98)  | 0.96 (0.88-0.98) |
| Right posterior cingulate cortex        | 2.46<br>(0.12)    | 2.47<br>(0.12)    | 2.46<br>(0.11)    | 2.46<br>(0.11)    | 4.70  | 4.69  | 4.48 | 4.66  | -1.89<br>(0.08) | -0.92<br>(0.37) | -0.45<br>(0.66) | 0.56<br>(1.18)  | 0.31<br>(1.29)  | 0.19<br>(1.66)  | 0.90<br>(0.93) | 1.01<br>(0.82) | 1.31<br>(0.98) | 0.97 | 0.96 | 0.94 | 0.96 (0.89-0.99) | 0.96 (0.89-0.99)  | 0.94 (0.84-0.98) |
| Right precentral gyrus                  | 2.59<br>(0.11)    | 2.59<br>(0.09)    | 2.58<br>(0.09)    | 2.57<br>(0.10)    | 4.15  | 3.61  | 3.55 | 3.92  | -0.06<br>(0.95) | 0.77<br>(0.45)  | 1.82<br>(0.09)  | 0.04<br>(1.21)  | -0.27<br>(1.48) | -0.62<br>(1.38) | 1.05<br>(0.54) | 1.29<br>(0.70) | 1.17<br>(0.91) | 0.96 | 0.93 | 0.94 | 0.95 (0.87-0.98) | 0.92 (0.80-0.97)  | 0.93 (0.81-0.98) |
| Right precuneus                         | 2.49<br>(0.08)    | 2.47<br>(0.07)    | 2.48<br>(0.07)    | 2.48<br>(0.07)    | 3.11  | 2.64  | 2.91 | 2.71  | 1.66<br>(0.12)  | 1.19<br>(0.25)  | 1.01<br>(0.33)  | -0.55<br>(1.36) | -0.29<br>(1.00) | -0.26<br>(1.08) | 1.24<br>(0.74) | 0.84<br>(0.59) | 0.85<br>(0.68) | 0.90 | 0.95 | 0.94 | 0.88 (0.69-0.96) | 0.94 (0.85-0.98)  | 0.93 (0.83-0.98) |
| Right rostral anterior cingulate cortex | 2.98<br>(0.15)    | 2.97<br>(0.15)    | 2.99<br>(0.14)    | 2.95<br>(0.16)    | 5.06  | 5.00  | 4.61 | 5.53  | 1.06<br>(0.30)  | -0.35<br>(0.73) | 2.01<br>(0.06)  | -0.47<br>(1.81) | 0.20<br>(2.01)  | -0.92<br>(1.80) | 1.60<br>(0.88) | 1.53<br>(1.26) | 1.48<br>(1.34) | 0.94 | 0.92 | 0.95 | 0.94 (0.83-0.98) | 0.92 (0.79-0.97)  | 0.93 (0.80-0.98) |
| Right rostral middle frontal gyrus      | 2.36<br>(0.05)    | 2.36<br>(0.05)    | 2.35<br>(0.05)    | 2.35<br>(0.06)    | 2.29  | 2.06  | 2.02 | 2.48  | -0.08<br>(0.94) | 1.42<br>(0.18)  | 1.46<br>(0.17)  | 0.04<br>(1.69)  | -0.66<br>(1.86) | -0.58<br>(1.56) | 1.44<br>(0.82) | 1.46<br>(1.29) | 1.39<br>(0.86) | 0.70 | 0.63 | 0.78 | 0.71 (0.33-0.89) | 0.61 (0.20-0.84)  | 0.77 (0.47-0.91) |
| Right superior frontal gyrus            | 2.72<br>(0.09)    | 2.73<br>(0.09)    | 2.71<br>(0.09)    | 2.71<br>(0.11)    | 3.43  | 3.20  | 3.38 | 3.88  | -0.16<br>(0.87) | 1.07<br>(0.30)  | 1.45<br>(0.17)  | 0.08<br>(1.70)  | -0.50<br>(1.89) | -0.67<br>(1.79) | 1.22<br>(1.14) | 1.44<br>(1.27) | 1.44<br>(1.21) | 0.87 | 0.85 | 0.89 | 0.88 (0.68-0.95) | 0.85 (0.62-0.94)  | 0.87 (0.68-0.95) |
| Right superior parietal cortex          | 2.20<br>(0.07)    | 2.19<br>(0.07)    | 2.19<br>(0.07)    | 2.19<br>(0.06)    | 3.32  | 3.33  | 3.23 | 2.97  | 1.26<br>(0.23)  | 1.55<br>(0.14)  | 1.52<br>(0.15)  | -0.44<br>(1.43) | -0.32<br>(0.82) | -0.59<br>(1.62) | 1.21<br>(0.83) | 0.69<br>(0.52) | 1.34<br>(1.03) | 0.91 | 0.97 | 0.88 | 0.91 (0.76-0.97) | 0.96 (0.90-0.99)  | 0.86 (0.66-0.95) |
| Right superior temporal gyrus           | 2.95<br>(0.12)    | 2.94<br>(0.12)    | 2.93<br>(0.13)    | 2.93<br>(0.14)    | 4.14  | 4.12  | 4.35 | 4.78  | 0.84<br>(0.41)  | 1.37<br>(0.19)  | 1.34<br>(0.20)  | -0.29<br>(1.36) | -0.41<br>(1.16) | -0.47<br>(1.27) | 0.96<br>(0.97) | 0.95<br>(0.74) | 1.03<br>(0.85) | 0.95 | 0.96 | 0.97 | 0.95 (0.86-0.98) | 0.96 (0.89-0.99)  | 0.95 (0.88-0.98) |
| Right supramarginal gyrus               | 2.51<br>(0.08)    | 2.50<br>(0.08)    | 2.50<br>(0.08)    | 2.49<br>(0.08)    | 3.12  | 3.07  | 3.22 | 3.21  | 0.81<br>(0.43)  | 0.54<br>(0.60)  | 1.28<br>(0.22)  | -0.26<br>(1.30) | -0.21<br>(1.56) | -0.49<br>(1.53) | 1.12<br>(0.66) | 1.30<br>(0.82) | 1.34<br>(0.83) | 0.91 | 0.88 | 0.88 | 0.92 (0.78-0.97) | 0.88 (0.70-0.96)  | 0.88 (0.70-0.96) |
| Right frontal pole                      | 2.66<br>(0.13)    | 2.68<br>(0.14)    | 2.60<br>(0.16)    | 2.67<br>(0.14)    | 4.70  | 5.23  | 6.08 | 5.42  | -0.56<br>(0.59) | 1.42<br>(0.18)  | -0.53<br>(0.60) | 0.44<br>(3.35)  | -2.69<br>(7.60) | 0.32<br>(2.64)  | 2.61<br>(2.05) | 4.49<br>(6.63) | 2.25<br>(1.30) | 0.77 | 0.07 | 0.87 | 0.78 (0.47-0.92) | 0.07 (-0.39-0.52) | 0.86 (0.66-0.95) |
| Right temporal pole                     | 3.83<br>(0.28)    | 3.81<br>(0.31)    | 3.82<br>(0.30)    | 3.83<br>(0.31)    | 7.26  | 8.06  | 7.81 | 8.08  | 0.42<br>(0.68)  | 0.17<br>(0.87)  | -0.21<br>(0.84) | -0.45<br>(3.95) | -0.16<br>(3.30) | 0.10<br>(3.18)  | 2.80<br>(2.73) | 2.23<br>(2.37) | 2.07<br>(2.35) | 0.88 | 0.92 | 0.93 | 0.88 (0.70-0.96) | 0.92 (0.80-0.97)  | 0.93 (0.80-0.97) |
| Right transverse temporal gyrus         | 2.74<br>(0.21)    | 2.73<br>(0.20)    | 2.75<br>(0.21)    | 2.74<br>(0.20)    | 7.65  | 7.48  | 7.70 | 7.31  | 1.01<br>(0.33)  | -0.39<br>(0.70) | 0.27<br>(0.79)  | -0.27<br>(1.12) | 0.12<br>(1.28)  | -0.06<br>(1.29) | 0.91<br>(0.67) | 1.07<br>(0.65) | 0.99<br>(0.80) | 0.99 | 0.99 | 0.99 | 0.99 (0.97-1.00) | 0.99 (0.96-1.00)  | 0.99 (0.96-1.00) |
| Right insula                            | 3.14<br>(0.16)    | 3.16<br>(0.14)    | 3.13<br>(0.15)    | 3.14<br>(0.09)    | 4.97  | 4.43  | 4.65 | 2.77  | -0.78<br>(0.45) | 1.06<br>(0.30)  | 0.05<br>(0.96)  | 0.54<br>(2.70)  | -0.50<br>(2.04) | 0.04<br>(3.47)  | 2.17<br>(1.60) | 1.46<br>(1.46) | 2.44<br>(2.38) | 0.85 | 0.92 | 0.77 | 0.85 (0.62-0.94) | 0.92 (0.79-0.97)  | 0.67 (0.27-0.87) |
| <b>Global brain measures</b>            |                   |                   |                   |                   |       |       |      |       |                 |                 |                 |                 |                 |                 |                |                |                |      |      |      |                  |                   |                  |
| Left total cortical volume (ml)         | 250.57<br>(21.45) | 250.33<br>(21.43) | 250.59<br>(22.81) | 250.78<br>(21.99) | 8.56  | 8.56  | 9.10 | 8.77  | 0.39<br>(0.70)  | -0.03<br>(0.98) | -0.31<br>(0.76) | -0.10<br>(0.98) | -0.04<br>(1.02) | 0.07<br>(1.07)  | 0.72<br>(0.63) | 0.68<br>(0.73) | 0.71<br>(0.79) | 0.99 | 0.99 | 0.99 | 0.99 (0.98-1.00) | 0.99 (0.98-1.00)  | 0.99 (0.98-1.00) |
| Right total cortical volume (ml)        | 252.63<br>(22.32) | 252.52<br>(22.69) | 251.69<br>(22.47) | 251.84<br>(21.50) | 8.83  | 8.98  |      |       |                 |                 |                 |                 |                 |                 |                |                |                |      |      |      |                  |                   |                  |

|                                                      |                     |                     |                     |                             |       |       |       |       |                 |                 |                 |                 |                 |                 |                |                |                |      |      |      |                      |                      |                      |
|------------------------------------------------------|---------------------|---------------------|---------------------|-----------------------------|-------|-------|-------|-------|-----------------|-----------------|-----------------|-----------------|-----------------|-----------------|----------------|----------------|----------------|------|------|------|----------------------|----------------------|----------------------|
| Left total cortical surface area (cm <sup>2</sup> )  | 894.23<br>(95.31)   | 894.59<br>(95.92)   | 895.06<br>(97.01)   | 896.9<br>6<br>(96.45)       | 10.66 | 10.72 | 10.84 | 10.75 | -0.74<br>(0.47) | -1.27<br>(0.22) | -3.54<br>(0.00) | 0.03<br>(0.22)  | 0.08<br>(0.28)  | 0.30<br>(0.36)  | 0.18<br>(0.12) | 0.22<br>(0.18) | 0.36<br>(0.28) | 1.00 | 1.00 | 1.00 | 1.00 (1.00-<br>1.00) | 1.00 (1.00-<br>1.00) | 1.00 (0.99-<br>1.00) |
| Right total cortical surface area (cm <sup>2</sup> ) | 895.33<br>(96.45)   | 895.73<br>(96.95)   | 894.40<br>(97.20)   | 895.8<br>8<br>(95.86)       | 10.77 | 10.82 | 10.87 | 10.70 | -0.62<br>(0.54) | 1.88<br>(0.08)  | -0.82<br>(0.42) | 0.04<br>(0.28)  | -0.11<br>(0.22) | 0.07<br>(0.31)  | 0.21<br>(0.18) | 0.20<br>(0.14) | 0.23<br>(0.21) | 1.00 | 1.00 | 1.00 | 1.00 (1.00-<br>1.00) | 1.00 (1.00-<br>1.00) | 1.00 (1.00-<br>1.00) |
| Left mean cortical thickness (mm)                    | 2.49<br>(0.06)      | 2.49<br>(0.06)      | 2.49<br>(0.05)      | 2.49<br>(0.06)              | 2.26  | 2.49  | 2.13  | 2.32  | 0.55<br>(0.59)  | 0.06<br>(0.95)  | 0.26<br>(0.80)  | -0.14<br>(0.97) | -0.01<br>(1.07) | -0.07<br>(1.05) | 0.76<br>(0.58) | 0.74<br>(0.75) | 0.80<br>(0.64) | 0.92 | 0.89 | 0.89 | 0.92 (0.79-<br>0.97) | 0.89 (0.72-<br>0.96) | 0.90 (0.73-<br>0.96) |
| Right mean cortical thickness (mm)                   | 2.52<br>(0.05)      | 2.52<br>(0.05)      | 2.51<br>(0.05)      | 2.51<br>(0.06)              | 2.08  | 1.89  | 1.87  | 2.25  | 0.63<br>(0.54)  | 1.19<br>(0.25)  | 1.47<br>(0.16)  | -0.17<br>(1.07) | -0.33<br>(1.13) | -0.41<br>(1.10) | 0.90<br>(0.56) | 0.93<br>(0.68) | 0.86<br>(0.78) | 0.86 | 0.84 | 0.87 | 0.86 (0.64-<br>0.95) | 0.83 (0.59-<br>0.94) | 0.86 (0.65-<br>0.95) |
| Left cerebellar white matter (ml)                    | 15.25<br>(1.48)     | 15.14<br>(1.59)     | 15.21<br>(1.59)     | 15.17<br>(1.68)             | 9.73  | 10.49 | 10.47 | 11.08 | 1.38<br>(0.19)  | 0.94<br>(0.36)  | 0.76<br>(0.46)  | -0.83<br>(2.37) | -0.39<br>(1.41) | -0.69<br>(3.05) | 1.66<br>(1.85) | 1.07<br>(0.96) | 2.19<br>(2.17) | 0.98 | 0.99 | 0.97 | 0.98 (0.93-<br>0.99) | 0.99 (0.98-<br>1.00) | 0.97 (0.91-<br>0.99) |
| Right cerebellar white matter (ml)                   | 14.48<br>(1.58)     | 14.24<br>(1.64)     | 14.38<br>(1.62)     | 14.37<br>(1.55)             | 10.94 | 11.50 | 11.28 | 10.79 | 2.29<br>(0.04)  | 1.19<br>(0.25)  | 1.40<br>(0.18)  | -1.70<br>(2.84) | -0.76<br>(2.52) | -0.75<br>(2.18) | 2.51<br>(2.10) | 1.94<br>(1.71) | 1.67<br>(1.54) | 0.97 | 0.98 | 0.98 | 0.96 (0.86-<br>0.99) | 0.97 (0.93-<br>0.99) | 0.98 (0.94-<br>0.99) |
| Left cerebellar gray matter (ml)                     | 55.82<br>(5.28)     | 55.83<br>(5.30)     | 55.75<br>(5.32)     | 55.82<br>(5.23)             | 9.46  | 9.49  | 9.53  | 9.37  | -0.03<br>(0.97) | 0.64<br>(0.53)  | -0.03<br>(0.98) | 0.00<br>(0.82)  | -0.13<br>(0.82) | 0.01<br>(0.70)  | 0.56<br>(0.58) | 0.57<br>(0.59) | 0.47<br>(0.50) | 1.00 | 1.00 | 1.00 | 1.00 (0.99-<br>1.00) | 1.00 (0.99-<br>1.00) | 1.00 (0.99-<br>1.00) |
| Right cerebellar gray matter (ml)                    | 54.79<br>(5.44)     | 54.83<br>(5.50)     | 54.61<br>(5.49)     | 54.93<br>(5.41)             | 9.92  | 10.03 | 10.06 | 9.85  | -0.31<br>(0.76) | 1.41<br>(0.18)  | -1.20<br>(0.25) | 0.05<br>(0.80)  | -0.35<br>(1.02) | 0.26<br>(0.86)  | 0.56<br>(0.56) | 0.60<br>(0.88) | 0.66<br>(0.59) | 1.00 | 1.00 | 1.00 | 1.00 (0.99-<br>1.00) | 1.00 (0.99-<br>1.00) | 1.00 (0.99-<br>1.00) |
| Intracranial volume (ml)                             | 1484.47<br>(258.06) | 1497.06<br>(242.06) | 1437.35<br>(264.02) | 1516.6<br>8<br>(233.8<br>8) | 17.38 | 16.17 | 18.37 | 15.42 | -1.39<br>(0.18) | 2.99<br>(0.01)  | -2.15<br>(0.05) | 1.06<br>(3.10)  | -3.38<br>(5.25) | 2.46<br>(4.65)  | 1.17<br>(3.06) | 3.38<br>(5.25) | 2.47<br>(4.65) | 0.99 | 0.97 | 0.97 | 0.99 (0.97-<br>1.00) | 0.96 (0.80-<br>0.99) | 0.96 (0.88-<br>0.99) |
| Total brain volume without ventricles (ml)           | 1158.90<br>(124.07) | 1158.88<br>(123.80) | 1157.40<br>(126.10) | 1158.7<br>7<br>(123.4<br>6) | 10.71 | 10.68 | 10.89 | 10.65 | 0.01<br>(0.99)  | 0.90<br>(0.38)  | 0.07<br>(0.94)  | 0.00<br>(0.52)  | -0.15<br>(0.56) | -0.01<br>(0.68) | 0.38<br>(0.35) | 0.41<br>(0.39) | 0.42<br>(0.52) | 1.00 | 1.00 | 1.00 | 1.00 (1.00-<br>1.00) | 1.00 (1.00-<br>1.00) | 1.00 (1.00-<br>1.00) |

Abbreviations: SD = standard deviation; Orig = original scan; FS df = FreeSurfer defacing; FSL df = FSL defacing; FM = Face Masking; t = t-statistic; p=p-value; PD = Average Percentage Difference; CI = Confidence Interval.

**Table S3. Effects of de-identification on brain measures in older adults.**

| Brain metric                          | Mean (SD)     |               |               |               | Coefficient of Variation |       |        |       | Paired t-test t(p) |              |              | Signed PD in % |              |               | Absolute PD (%) |              |              | Pearson's r |        |      | ICC (95% CI)     |                  |                  |
|---------------------------------------|---------------|---------------|---------------|---------------|--------------------------|-------|--------|-------|--------------------|--------------|--------------|----------------|--------------|---------------|-----------------|--------------|--------------|-------------|--------|------|------------------|------------------|------------------|
|                                       | Orig          | FS df         | FSL df        | FM            | Orig                     | FS df | FSL df | FM    | FS df              | FSL df       | FM           | FS df          | FSL df       | FM            | FS df           | FSL df       | FM           | FS df       | FSL df | FM   | FS df            | FSL df           | FM               |
| <b>Subcortical volume (ml)</b>        |               |               |               |               |                          |       |        |       |                    |              |              |                |              |               |                 |              |              |             |        |      |                  |                  |                  |
| Left thalamus                         | 6.42 (0.80)   | 6.42 (0.78)   | 6.47 (0.81)   | 6.41 (0.79)   | 12.41                    | 12.18 | 12.53  | 12.35 | 0.01 (0.99)        | -1.74 (0.09) | 0.16 (0.88)  | 0.04 (3.43)    | 0.78 (3.00)  | -0.08 (3.85)  | 2.12 (2.67)     | 2.46 (1.85)  | 2.72 (2.69)  | 0.95        | 0.97   | 0.94 | 0.95 (0.91-0.97) | 0.97 (0.94-0.98) | 0.94 (0.90-0.97) |
| Left caudatus                         | 3.13 (0.41)   | 3.12 (0.41)   | 3.11 (0.39)   | 3.14 (0.40)   | 12.98                    | 13.05 | 12.62  | 12.77 | 0.08 (0.93)        | 0.73 (0.47)  | -0.99 (0.33) | -0.06 (3.53)   | -0.38 (4.00) | 0.53 (3.08)   | 2.32 (2.64)     | 2.34 (3.25)  | 2.16 (2.24)  | 0.96        | 0.95   | 0.97 | 0.96 (0.93-0.98) | 0.95 (0.91-0.97) | 0.97 (0.95-0.98) |
| Left putamen                          | 4.10 (0.56)   | 4.14 (0.48)   | 4.09 (0.55)   | 4.11 (0.50)   | 13.57                    | 11.49 | 13.54  | 12.20 | -1.28 (0.21)       | 0.54 (0.59)  | -0.43 (0.67) | 1.31 (6.64)    | -0.21 (2.88) | 0.49 (5.24)   | 2.50 (6.28)     | 2.04 (2.01)  | 2.28 (4.73)  | 0.94        | 0.98   | 0.96 | 0.92 (0.86-0.96) | 0.98 (0.96-0.99) | 0.96 (0.92-0.98) |
| Left pallidum                         | 1.91 (0.20)   | 1.92 (0.20)   | 1.92 (0.18)   | 1.89 (0.19)   | 10.39                    | 10.33 | 9.54   | 9.97  | -0.60 (0.55)       | -0.24 (0.81) | 1.51 (0.14)  | 0.31 (3.19)    | 0.24 (4.62)  | -0.89 (3.98)  | 2.60 (1.84)     | 3.55 (2.92)  | 2.93 (2.81)  | 0.95        | 0.89   | 0.92 | 0.95 (0.90-0.97) | 0.89 (0.81-0.94) | 0.92 (0.86-0.96) |
| Left hippocampus                      | 3.34 (0.55)   | 3.31 (0.56)   | 3.33 (0.56)   | 3.31 (0.56)   | 16.60                    | 16.92 | 16.74  | 16.84 | 2.36 (0.02)        | 1.05 (0.30)  | 2.72 (0.01)  | -0.96 (2.64)   | -0.42 (2.58) | -0.92 (2.15)  | 2.15 (1.79)     | 1.92 (1.74)  | 1.77 (1.52)  | 0.99        | 0.99   | 0.99 | 0.99 (0.98-0.99) | 0.99 (0.98-0.99) | 0.99 (0.98-1.00) |
| Left amygdala                         | 1.34 (0.27)   | 1.34 (0.27)   | 1.33 (0.27)   | 1.30 (0.26)   | 20.32                    | 19.90 | 20.44  | 20.39 | -0.38 (0.71)       | 0.91 (0.37)  | 4.48 (0.00)  | 0.36 (4.77)    | -0.50 (3.66) | -3.03 (4.79)  | 3.60 (3.10)     | 2.95 (2.18)  | 4.19 (3.79)  | 0.97        | 0.99   | 0.98 | 0.97 (0.95-0.98) | 0.99 (0.98-0.99) | 0.97 (0.89-0.99) |
| Left accumbens                        | 0.36 (0.09)   | 0.35 (0.09)   | 0.36 (0.09)   | 0.36 (0.08)   | 25.12                    | 24.38 | 23.59  | 23.59 | 0.70 (0.49)        | -0.41 (0.68) | 0.27 (0.79)  | -0.95 (10.04)  | 0.91 (9.79)  | -0.22 (11.23) | 8.00 (6.02)     | 7.68 (6.02)  | 8.24 (7.53)  | 0.92        | 0.93   | 0.93 | 0.92 (0.86-0.96) | 0.93 (0.88-0.96) | 0.93 (0.87-0.96) |
| Right thalamus                        | 6.16 (0.64)   | 6.21 (0.67)   | 6.17 (0.66)   | 6.21 (0.70)   | 10.42                    | 10.76 | 10.70  | 11.21 | -2.24 (0.03)       | -0.19 (0.85) | -1.58 (0.12) | 0.81 (2.30)    | 0.10 (3.52)  | 0.68 (2.86)   | 1.86 (1.56)     | 2.35 (2.60)  | 2.13 (2.00)  | 0.97        | 0.94   | 0.96 | 0.97 (0.94-0.98) | 0.94 (0.89-0.97) | 0.96 (0.92-0.98) |
| Right caudatus                        | 3.25 (0.38)   | 3.26 (0.38)   | 3.23 (0.38)   | 3.24 (0.40)   | 11.82                    | 11.62 | 11.70  | 12.30 | -0.92 (0.36)       | 1.01 (0.32)  | 0.34 (0.73)  | 0.46 (2.91)    | -0.46 (2.87) | -0.27 (3.97)  | 2.09 (2.05)     | 1.96 (2.13)  | 2.57 (3.01)  | 0.97        | 0.97   | 0.94 | 0.97 (0.94-0.98) | 0.97 (0.94-0.98) | 0.94 (0.90-0.97) |
| Right putamen                         | 4.17 (0.52)   | 4.20 (0.52)   | 4.21 (0.52)   | 4.16 (0.52)   | 12.51                    | 12.48 | 12.45  | 12.50 | -1.85 (0.07)       | -2.90 (0.01) | 0.49 (0.62)  | 0.81 (3.11)    | 1.02 (2.25)  | -0.27 (3.74)  | 2.22 (2.31)     | 1.77 (1.71)  | 2.29 (2.96)  | 0.97        | 0.98   | 0.96 | 0.97 (0.95-0.99) | 0.98 (0.96-0.99) | 0.96 (0.92-0.98) |
| Right pallidum                        | 1.81 (0.22)   | 1.81 (0.21)   | 1.82 (0.22)   | 1.81 (0.23)   | 12.19                    | 11.43 | 12.13  | 12.58 | 0.71 (0.48)        | -0.50 (0.62) | 0.39 (0.70)  | -0.34 (4.08)   | 0.28 (3.59)  | -0.40 (5.27)  | 3.06 (2.68)     | 3.02 (1.91)  | 3.81 (3.61)  | 0.95        | 0.96   | 0.90 | 0.95 (0.90-0.97) | 0.96 (0.92-0.98) | 0.90 (0.82-0.94) |
| Right hippocampus                     | 3.50 (0.58)   | 3.48 (0.60)   | 3.50 (0.58)   | 3.50 (0.58)   | 16.69                    | 17.19 | 16.69  | 16.56 | 1.90 (0.06)        | 0.64 (0.53)  | 0.75 (0.46)  | -0.66 (2.15)   | -0.19 (2.37) | -0.16 (1.91)  | 1.67 (1.49)     | 1.78 (1.55)  | 1.56 (1.08)  | 0.99        | 0.99   | 0.99 | 0.99 (0.99-1.00) | 0.99 (0.99-1.00) | 0.99 (0.99-1.00) |
| Right amygdala                        | 1.58 (0.27)   | 1.59 (0.27)   | 1.59 (0.28)   | 1.57 (0.27)   | 17.12                    | 16.65 | 17.32  | 17.45 | -0.95 (0.35)       | -0.87 (0.39) | 1.87 (0.07)  | 0.68 (3.89)    | 0.36 (2.97)  | -1.05 (3.50)  | 2.91 (2.63)     | 2.41 (1.72)  | 2.89 (2.20)  | 0.98        | 0.98   | 0.98 | 0.98 (0.96-0.99) | 0.98 (0.97-0.99) | 0.98 (0.96-0.99) |
| Right accumbens                       | 0.45 (0.09)   | 0.45 (0.09)   | 0.46 (0.09)   | 0.45 (0.08)   | 19.99                    | 20.67 | 19.81  | 18.72 | -0.46 (0.65)       | -2.20 (0.03) | -1.43 (0.16) | 0.34 (6.88)    | 2.23 (6.73)  | 1.86 (7.65)   | 5.10 (4.55)     | 5.04 (4.94)  | 6.26 (4.69)  | 0.94        | 0.95   | 0.93 | 0.94 (0.90-0.97) | 0.94 (0.89-0.97) | 0.93 (0.87-0.96) |
| <b>Ventricular volume (ml)</b>        |               |               |               |               |                          |       |        |       |                    |              |              |                |              |               |                 |              |              |             |        |      |                  |                  |                  |
| Third ventricle                       | 1.99 (0.77)   | 1.98 (0.75)   | 1.95 (0.73)   | 1.97 (0.73)   | 38.84                    | 38.06 | 37.30  | 36.88 | 0.42 (0.68)        | 0.94 (0.35)  | 0.62 (0.54)  | -0.26 (3.54)   | -1.35 (7.80) | -0.54 (7.39)  | 1.93 (2.96)     | 2.76 (7.41)  | 3.12 (6.71)  | 0.99        | 0.95   | 0.96 | 0.99 (0.98-0.99) | 0.95 (0.91-0.97) | 0.95 (0.92-0.98) |
| Left lateral ventricle                | 22.72 (11.54) | 22.72 (11.55) | 22.69 (11.40) | 22.73 (11.56) | 50.78                    | 50.86 | 50.25  | 50.87 | 0.09 (0.93)        | 0.37 (0.71)  | -0.41 (0.69) | -0.09 (0.75)   | 0.03 (1.13)  | 0.00 (0.78)   | 0.53 (0.53)     | 0.71 (0.87)  | 0.60 (0.49)  | 1.00        | 1.00   | 1.00 | 1.00 (1.00-1.00) | 1.00 (1.00-1.00) | 1.00 (1.00-1.00) |
| Left inferior lateral ventricle       | 1.06 (1.00)   | 1.06 (1.01)   | 1.06 (0.99)   | 1.05 (0.99)   | 94.71                    | 95.42 | 93.45  | 94.86 | -0.05 (0.96)       | 0.33 (0.74)  | 1.08 (0.29)  | -0.53 (13.27)  | 0.45 (13.02) | -2.28 (12.95) | 8.75 (9.90)     | 7.84 (10.34) | 8.56 (9.91)  | 1.00        | 1.00   | 1.00 | 1.00 (0.99-1.00) | 1.00 (0.99-1.00) | 1.00 (0.99-1.00) |
| Right lateral ventricle               | 19.46 (8.92)  | 19.45 (8.92)  | 19.51 (9.04)  | 19.45 (8.93)  | 45.85                    | 45.87 | 46.35  | 45.93 | 0.64 (0.52)        | -1.30 (0.20) | 0.53 (0.60)  | -0.11 (0.89)   | 0.07 (0.74)  | -0.12 (0.88)  | 0.62 (0.64)     | 0.51 (0.55)  | 0.68 (0.57)  | 1.00        | 1.00   | 1.00 | 1.00 (1.00-1.00) | 1.00 (1.00-1.00) | 1.00 (1.00-1.00) |
| Right inferior lateral ventricle      | 0.92 (0.82)   | 0.94 (0.84)   | 0.93 (0.83)   | 0.92 (0.81)   | 88.26                    | 89.58 | 89.25  | 88.13 | -2.11 (0.04)       | -1.19 (0.24) | 0.42 (0.68)  | 1.71 (7.25)    | 0.41 (9.24)  | -0.66 (7.60)  | 5.22 (5.26)     | 5.63 (7.28)  | 5.01 (5.70)  | 1.00        | 1.00   | 1.00 | 1.00 (1.00-1.00) | 1.00 (1.00-1.00) | 1.00 (1.00-1.00) |
| <b>Local cortical volume (ml)</b>     |               |               |               |               |                          |       |        |       |                    |              |              |                |              |               |                 |              |              |             |        |      |                  |                  |                  |
| Left banks superior temporal sulcus   | 1.99 (0.34)   | 1.96 (0.32)   | 1.97 (0.33)   | 1.98 (0.35)   | 17.06                    | 16.54 | 16.63  | 17.86 | 1.51 (0.14)        | 1.17 (0.25)  | 0.41 (0.68)  | -1.21 (5.62)   | -0.63 (4.40) | -0.40 (4.55)  | 3.69 (4.37)     | 3.26 (2.98)  | 3.60 (2.75)  | 0.94        | 0.97   | 0.97 | 0.94 (0.90-0.97) | 0.97 (0.95-0.98) | 0.97 (0.94-0.98) |
| Left caudal anterior cingulate cortex | 1.50 (0.42)   | 1.52 (0.40)   | 1.52 (0.39)   | 1.53 (0.39)   | 27.83                    | 26.16 | 25.74  | 25.65 | -1.16 (0.25)       | -0.72 (0.47) | -1.75 (0.09) | 2.30 (13.94)   | 2.00 (13.90) | 3.20 (13.81)  | 6.15 (12.69)    | 5.77 (12.77) | 6.09 (12.78) | 0.96        | 0.96   | 0.96 | 0.96 (0.92-0.98) | 0.95 (0.92-0.97) | 0.95 (0.92-0.98) |
| Left caudal middle frontal gyrus      | 5.23 (0.94)   | 5.21 (0.96)   | 5.21 (0.96)   | 5.22 (0.96)   | 18.00                    | 18.34 | 18.50  | 18.33 | 1.23 (0.23)        | 1.00 (0.32)  | 0.53 (0.60)  | -0.47 (2.17)   | -0.45 (2.45) | -0.27 (2.68)  | 1.80 (1.27)     | 1.80 (1.70)  | 2.17 (1.56)  | 0.99        | 0.99   | 0.99 | 0.99 (0.99-1.00) | 0.99 (0.99-1.00) | 0.99 (0.98-0.99) |
| Left cuneus                           | 2.74 (0.43)   | 2.75 (0.44)   | 2.76 (0.43)   | 2.76 (0.43)   | 15.86                    | 15.90 | 15.61  | 15.59 | -0.77 (0.45)       | -1.38 (0.17) | -0.78 (0.44) | 0.33 (2.87)    | 0.93 (4.55)  | 0.68 (5.65)   | 2.15 (1.91)     | 2.66 (3.79)  | 2.64 (5.02)  | 0.98        | 0.96   | 0.94 | 0.98 (0.97-0.99) | 0.96 (0.93-0.98) | 0.94 (0.89-0.97) |
| Left entorhinal cortex                | 1.74 (0.52)   | 1.75 (0.49)   | 1.77 (0.44)   | 1.79 (0.47)   | 29.81                    | 27.93 | 24.87  | 26.20 | -0.46 (0.65)       | -1.23 (0.23) | -2.05 (0.05) | 1.12 (8.87)    | 3.45 (13.49) | 3.89 (11.03)  | 7.15 (5.27)     | 7.76 (11.51) | 8.15 (8.31)  | 0.96        | 0.93   | 0.95 | 0.96 (0.92-0.98) | 0.92 (0.86-0.96) | 0.95 (0.90-0.97) |
| Left fusiform gyrus                   | 8.37 (1.29)   | 8.37 (1.24)   | 8.35 (1.28)   | 8.37 (1.26)   | 15.43                    | 14.82 | 15.31  | 15.08 | -0.06 (0.95)       | 0.63 (0.53)  | -0.08 (0.94) | 0.14 (3.08)    | -0.28 (3.25) | 0.09 (3.26)   | 2.05 (2.29)     | 2.26 (2.32)  | 2.16 (2.42)  | 0.98        | 0.98   | 0.98 | 0.98 (0.97-0.99) | 0.98 (0.97-0.99) | 0.98 (0.97-0.99) |
| Left inferior parietal cortex         | 9.56 (1.85)   | 9.43 (1.85)   | 9.55 (1.89)   | 9.59 (1.87)   | 19.37                    | 19.65 | 19.79  | 19.53 | 1.61 (0.11)        | 0.25 (0.80)  | -0.87 (0.39) | -1.32 (5.89)   | -0.17 (2.09) | 0.30 (2.63)   | 2.58 (5.44)     | 1.72 (1.18)  | 1.95 (1.77)  | 0.96        | 0.99   | 0.99 | 0.96 (0.93-0.98) | 0.99 (0.99-1.00) | 0.99 (0.99-1.00) |
| Left inferior temporal gyrus          | 9.30 (1.51)   | 9.30 (1.54)   | 9.32 (1.56)   | 9.33 (1.53)   | 16.26                    | 16.60 | 16.72  | 16.37 | -0.04 (0.97)       | -0.43 (0.67) | -0.77 (0.45) | -0.04 (2.29)   | 0.10 (2.98)  | 0.23 (2.33)   | 1.81 (1.39)     | 2.37 (1.77)  | 1.69 (1.61)  | 0.99        | 0.99   | 0.99 | 0.99 (0.98-0.99) | 0.99 (0.97-0.99) | 0.99 (0.98-1.00) |
| Left isthmus cingulate cortex         | 2.29 (0.42)   | 2.27 (0.42)   | 2.27 (0.43)   | 2.30 (0.42)   | 18.43                    | 18.66 | 18.78  | 18.39 | 0.83 (0.41)        | 1.38 (0.18)  | -0.93 (0.36) | -0.72 (5.72)   | -0.88 (4.29) | 0.55 (4.52)   | 4.29 (3.78)     | 3.31 (2.83)  | 3.30 (3.10)  | 0.95        | 0.98   | 0.98 | 0.95 (0.92-0.97) | 0.98 (0.96-0.99) | 0.98 (0.96-0.99) |
| Left lateral occipital cortex         | 10.73 (1.62)  | 10.83 (1.65)  | 10.75 (1.59)  | 10.77 (1.62)  | 15.09                    | 15.28 | 14.78  | 15.06 | -2.04 (0.05)       | -0.41 (0.69) | -1.04 (0.30) | 0.81 (2.88)    | 0.21 (2.70)  | 0.32 (2.19)   | 1.84 (2.35)     | 1.97 (1.84)  | 1.58 (1.53)  | 0.98        | 0.98   | 0.99 | 0.98 (0.97-0.99) | 0.98 (0.97-0.99) | 0.99 (0.98-1.00) |
| Left lateral orbitofrontal cortex     | 6.75 (0.71)   | 6.73 (0.71)   | 6.71 (0.71)   | 6.75 (0.71)   | 10.56                    | 10.59 | 10.65  | 10.45 | 0.97 (0.34)        | 1.51 (0.14)  | -0.13 (0.90) | -0.32 (2.07)   | -0.50 (2.11) | 0.06 (2.40)   | 1.69 (1.21)     | 1.63 (1.40)  | 1.83 (1.53)  | 0.98        | 0.98   | 0.97 | 0.98 (0.96-0.99) | 0.98 (0.96-0.99) | 0.97 (0.95-0.99) |
| Left lingual gyrus                    | 6.07 (0.90)   | 6.09 (0.91)   | 6.08 (0.91)   | 6.09 (0.90)   | 14.76                    | 14.91 | 15.05  | 14.72 | -0.44 (0.66)       | -0.30 (0.77) | -0.85 (0.40) | 0.16 (2.90)    | 0.06 (1.85)  | 0.25 (1.79)   | 1.78 (2.28)     | 1.45 (1.13)  | 1.27 (1.26)  | 0.98        | 0.99   | 0.99 | 0.98 (0.97-0.99) | 0.99 (0.98-1.00) | 0.99 (0.99-1.00) |
| Left medial orbitofrontal cortex      | 4.57 (0.55)   | 4.54 (0.56)   | 4.54 (0.54)   | 4.59 (0.54)   | 12.00                    | 12.32 | 11.97  | 11.77 | 0.78 (0.44)        | 1.21 (0.23)  | -0.54 (0.59) | -0.69 (5.61)   | -0.80 (4.40) | 0.41 (4.72)   | 4.08 (3.87)     | 3.63 (2.55)  | 3.60 (3.03)  | 0.90        | 0.93   | 0.92 | 0.90 (0.82-0.94) | 0.93 (0.88-0.96) | 0.92 (0.87-0.96) |

|                                        |                 |                 |                 |                 |       |       |       |       |                 |                 |                 |                  |                  |                 |                 |                  |                  |      |      |      |                  |                  |                  |
|----------------------------------------|-----------------|-----------------|-----------------|-----------------|-------|-------|-------|-------|-----------------|-----------------|-----------------|------------------|------------------|-----------------|-----------------|------------------|------------------|------|------|------|------------------|------------------|------------------|
| Left middle temporal gyrus             | 9.10<br>(1.39)  | 9.07<br>(1.50)  | 9.05<br>(1.45)  | 9.05<br>(1.46)  | 15.33 | 16.50 | 16.01 | 16.11 | 0.62<br>(0.54)  | 1.83<br>(0.07)  | 1.71<br>(0.09)  | -0.52<br>(3.61)  | -0.73<br>(2.31)  | -0.70<br>(2.37) | 2.06<br>(2.99)  | 1.84<br>(1.55)   | 1.73<br>(1.76)   | 0.98 | 0.99 | 0.99 | 0.98 (0.96-0.99) | 0.99 (0.98-0.99) | 0.99 (0.98-0.99) |
| Left parahippocampal gyrus             | 1.84<br>(0.36)  | 1.85<br>(0.38)  | 1.85<br>(0.37)  | 1.87<br>(0.38)  | 19.31 | 20.36 | 19.73 | 20.63 | -0.55<br>(0.58) | -0.62<br>(0.54) | -1.44<br>(0.16) | 0.17<br>(4.33)   | 0.37<br>(4.39)   | 1.01<br>(5.08)  | 3.41<br>(2.61)  | 3.25<br>(2.93)   | 3.88<br>(3.38)   | 0.98 | 0.98 | 0.97 | 0.98 (0.96-0.99) | 0.98 (0.96-0.99) | 0.97 (0.94-0.98) |
| Left paracentral lobule                | 3.21<br>(0.43)  | 3.19<br>(0.45)  | 3.20<br>(0.44)  | 3.20<br>(0.44)  | 13.42 | 14.15 | 13.74 | 13.73 | 1.40<br>(0.17)  | 1.10<br>(0.28)  | 0.71<br>(0.48)  | -0.83<br>(3.38)  | -0.56<br>(3.14)  | -0.35<br>(2.81) | 2.68<br>(2.18)  | 2.62<br>(1.78)   | 2.33<br>(1.56)   | 0.97 | 0.97 | 0.98 | 0.97 (0.94-0.98) | 0.97 (0.95-0.98) | 0.98 (0.96-0.99) |
| Left pars opercularis                  | 3.94<br>(0.53)  | 3.98<br>(0.54)  | 3.96<br>(0.56)  | 3.95<br>(0.52)  | 13.38 | 13.64 | 14.20 | 13.29 | -1.66<br>(0.10) | -1.15<br>(0.26) | -0.37<br>(0.72) | 0.93<br>(3.45)   | 0.38<br>(2.90)   | 0.16<br>(2.52)  | 2.59<br>(2.43)  | 2.25<br>(1.84)   | 2.01<br>(1.49)   | 0.96 | 0.98 | 0.98 | 0.96 (0.93-0.98) | 0.98 (0.96-0.99) | 0.98 (0.97-0.99) |
| Left pars orbitalis                    | 2.16<br>(0.33)  | 2.14<br>(0.35)  | 2.16<br>(0.34)  | 2.14<br>(0.34)  | 15.14 | 16.17 | 15.75 | 15.74 | 1.23<br>(0.22)  | -0.12<br>(0.91) | 1.31<br>(0.20)  | -1.05<br>(4.61)  | -0.05<br>(3.46)  | -0.86<br>(3.94) | 3.77<br>(2.80)  | 2.75<br>(2.05)   | 3.02<br>(2.64)   | 0.96 | 0.98 | 0.97 | 0.96 (0.92-0.98) | 0.98 (0.96-0.99) | 0.97 (0.94-0.98) |
| Left pars triangularis                 | 3.18<br>(0.45)  | 3.15<br>(0.46)  | 3.16<br>(0.45)  | 3.17<br>(0.45)  | 14.17 | 14.50 | 14.15 | 14.33 | 1.85<br>(0.07)  | 1.06<br>(0.30)  | 0.31<br>(0.76)  | -0.82<br>(2.86)  | -0.44<br>(2.75)  | -0.18<br>(3.42) | 2.38<br>(1.76)  | 2.17<br>(1.71)   | 2.68<br>(2.09)   | 0.98 | 0.98 | 0.97 | 0.98 (0.96-0.99) | 0.98 (0.97-0.99) | 0.97 (0.95-0.99) |
| Left pericalcarine cortex              | 1.93<br>(0.30)  | 1.96<br>(0.35)  | 1.92<br>(0.31)  | 1.93<br>(0.31)  | 15.50 | 17.97 | 16.36 | 16.06 | -0.79<br>(0.44) | 0.85<br>(0.40)  | -0.80<br>(0.43) | 1.35<br>(12.32)  | -0.60<br>(3.72)  | 0.35<br>(3.74)  | 4.76<br>(11.42) | 3.09<br>(2.10)   | 2.80<br>(2.46)   | 0.64 | 0.98 | 0.97 | 0.64 (0.42-0.78) | 0.97 (0.95-0.99) | 0.97 (0.95-0.99) |
| Left postcentral gyrus                 | 8.44<br>(1.12)  | 8.43<br>(1.12)  | 8.41<br>(1.13)  | 8.45<br>(1.12)  | 13.27 | 13.27 | 13.47 | 13.27 | 0.27<br>(0.79)  | 1.74<br>(0.09)  | -0.37<br>(0.71) | -0.10<br>(2.40)  | -0.41<br>(1.42)  | 0.09<br>(1.65)  | 1.42<br>(1.93)  | 1.18<br>(0.87)   | 1.26<br>(1.05)   | 0.99 | 0.99 | 0.99 | 0.99 (0.97-0.99) | 0.99 (0.99-1.00) | 0.99 (0.99-1.00) |
| Left posterior cingulate cortex        | 2.66<br>(0.49)  | 2.64<br>(0.47)  | 2.66<br>(0.47)  | 2.67<br>(0.49)  | 18.39 | 17.80 | 17.58 | 18.49 | 0.67<br>(0.51)  | 0.05<br>(0.96)  | -0.75<br>(0.46) | -0.41<br>(5.25)  | 0.11<br>(11.28)  | 0.59<br>(5.30)  | 3.87<br>(3.52)  | 5.30<br>(9.92)   | 3.96<br>(3.53)   | 0.96 | 0.87 | 0.96 | 0.96 (0.93-0.98) | 0.88 (0.78-0.93) | 0.96 (0.94-0.98) |
| Left precentral gyrus                  | 12.26<br>(1.44) | 12.26<br>(1.44) | 12.27<br>(1.46) | 12.26<br>(1.45) | 11.75 | 11.77 | 11.93 | 11.84 | 0.21<br>(0.83)  | -0.09<br>(0.93) | 0.21<br>(0.83)  | -0.06<br>(1.68)  | 0.00<br>(1.64)   | -0.06<br>(1.76) | 1.30<br>(1.05)  | 1.30<br>(0.98)   | 1.44<br>(0.99)   | 0.99 | 0.99 | 0.99 | 0.99 (0.98-0.99) | 0.99 (0.98-1.00) | 0.99 (0.98-0.99) |
| Left precuneus                         | 8.14<br>(1.20)  | 8.11<br>(1.25)  | 8.12<br>(1.25)  | 8.12<br>(1.23)  | 14.79 | 15.38 | 15.44 | 15.10 | 0.92<br>(0.36)  | 1.05<br>(0.30)  | 1.10<br>(0.28)  | -0.41<br>(2.47)  | -0.39<br>(2.03)  | -0.35<br>(1.90) | 1.58<br>(1.92)  | 1.51<br>(1.40)   | 1.46<br>(1.25)   | 0.99 | 0.99 | 0.99 | 0.99 (0.98-0.99) | 0.99 (0.99-1.00) | 0.99 (0.99-1.00) |
| Left rostral anterior cingulate cortex | 2.31<br>(0.55)  | 2.29<br>(0.46)  | 2.31<br>(0.51)  | 2.33<br>(0.52)  | 23.65 | 19.97 | 22.11 | 22.53 | 0.99<br>(0.33)  | 0.03<br>(0.98)  | -0.86<br>(0.39) | 0.03<br>(7.83)   | 0.54<br>(7.14)   | 1.25<br>(8.09)  | 4.50<br>(6.38)  | 3.66<br>(6.13)   | 4.49<br>(6.81)   | 0.97 | 0.98 | 0.97 | 0.96 (0.92-0.98) | 0.98 (0.96-0.99) | 0.97 (0.95-0.98) |
| Left rostral middle frontal gyrus      | 13.13<br>(1.95) | 13.10<br>(1.98) | 13.16<br>(1.96) | 13.13<br>(1.93) | 14.88 | 15.13 | 14.91 | 14.74 | 0.38<br>(0.71)  | -0.74<br>(0.47) | -0.13<br>(0.90) | -0.19<br>(2.89)  | 0.24<br>(2.08)   | 0.05<br>(2.18)  | 1.91<br>(2.16)  | 1.66<br>(1.25)   | 1.75<br>(1.27)   | 0.98 | 0.99 | 0.99 | 0.98 (0.97-0.99) | 0.99 (0.98-0.99) | 0.99 (0.98-0.99) |
| Left superior frontal gyrus            | 19.35<br>(2.73) | 19.28<br>(2.71) | 19.33<br>(2.76) | 19.35<br>(2.74) | 14.12 | 14.04 | 14.26 | 14.14 | 1.28<br>(0.21)  | 0.49<br>(0.63)  | -0.01<br>(1.00) | -0.32<br>(1.70)  | -0.12<br>(1.37)  | 0.00<br>(1.57)  | 1.07<br>(1.35)  | 0.96<br>(0.97)   | 1.14<br>(1.07)   | 0.99 | 1.00 | 0.99 | 0.99 (0.99-1.00) | 1.00 (0.99-1.00) | 0.99 (0.99-1.00) |
| Left superior parietal cortex          | 11.37<br>(1.80) | 11.29<br>(1.88) | 11.34<br>(1.79) | 11.36<br>(1.77) | 15.87 | 16.68 | 15.80 | 15.59 | 1.24<br>(0.22)  | 0.98<br>(0.33)  | 0.40<br>(0.69)  | -0.90<br>(5.04)  | -0.23<br>(1.52)  | -0.07<br>(1.72) | 1.90<br>(4.75)  | 1.20<br>(0.94)   | 1.39<br>(1.00)   | 0.98 | 1.00 | 0.99 | 0.97 (0.95-0.99) | 1.00 (0.99-1.00) | 0.99 (0.99-1.00) |
| Left superior temporal gyrus           | 10.66<br>(1.47) | 10.69<br>(1.52) | 10.67<br>(1.53) | 10.72<br>(1.53) | 13.82 | 14.22 | 14.33 | 14.27 | -0.77<br>(0.44) | -0.40<br>(0.69) | -1.60<br>(0.12) | 0.16<br>(1.89)   | 0.04<br>(1.95)   | 0.45<br>(2.15)  | 1.41<br>(1.25)  | 1.53<br>(1.19)   | 1.68<br>(1.39)   | 0.99 | 0.99 | 0.99 | 0.99 (0.98-1.00) | 0.99 (0.98-1.00) | 0.99 (0.98-0.99) |
| Left supramarginal gyrus               | 9.54<br>(1.46)  | 9.53<br>(1.52)  | 9.56<br>(1.52)  | 9.56<br>(1.50)  | 15.32 | 15.98 | 15.94 | 15.65 | 0.16<br>(0.88)  | -0.52<br>(0.60) | -0.58<br>(0.57) | -0.20<br>(4.72)  | 0.06<br>(1.87)   | 0.11<br>(1.94)  | 2.06<br>(4.24)  | 1.45<br>(1.16)   | 1.45<br>(1.27)   | 0.96 | 0.99 | 0.99 | 0.96 (0.92-0.98) | 0.99 (0.99-1.00) | 0.99 (0.99-1.00) |
| Left frontal pole                      | 0.88<br>(0.14)  | 0.87<br>(0.14)  | 0.89<br>(0.14)  | 0.87<br>(0.15)  | 16.22 | 16.31 | 15.37 | 16.97 | 1.28<br>(0.21)  | -0.52<br>(0.60) | 1.79<br>(0.08)  | -1.53<br>(7.78)  | 0.68<br>(7.52)   | -1.75<br>(5.99) | 6.36<br>(4.64)  | 6.41<br>(3.85)   | 4.89<br>(3.80)   | 0.88 | 0.89 | 0.93 | 0.88 (0.79-0.93) | 0.89 (0.80-0.94) | 0.93 (0.87-0.96) |
| Left temporal pole                     | 2.30<br>(0.33)  | 2.23<br>(0.32)  | 2.31<br>(0.35)  | 2.27<br>(0.31)  | 14.26 | 14.30 | 15.14 | 13.63 | 2.56<br>(0.01)  | -0.62<br>(0.54) | 0.92<br>(0.36)  | -2.93<br>(7.68)  | 0.55<br>(7.27)   | -1.10<br>(8.61) | 6.43<br>(5.05)  | 6.07<br>(3.93)   | 6.50<br>(5.67)   | 0.86 | 0.88 | 0.82 | 0.85 (0.72-0.92) | 0.88 (0.79-0.93) | 0.82 (0.69-0.90) |
| Left transverse temporal gyrus         | 1.04<br>(0.17)  | 1.03<br>(0.18)  | 1.04<br>(0.18)  | 1.03<br>(0.17)  | 16.86 | 17.74 | 17.01 | 16.71 | 0.80<br>(0.43)  | -0.35<br>(0.73) | 0.22<br>(0.83)  | -0.64<br>(4.21)  | 0.19<br>(4.38)   | -0.09<br>(3.64) | 3.07<br>(2.91)  | 3.58<br>(2.46)   | 2.85<br>(2.23)   | 0.97 | 0.97 | 0.98 | 0.97 (0.95-0.99) | 0.97 (0.94-0.98) | 0.98 (0.96-0.99) |
| Left insula                            | 6.50<br>(0.76)  | 6.50<br>(0.77)  | 6.51<br>(0.72)  | 6.51<br>(0.76)  | 11.64 | 11.87 | 11.06 | 11.66 | -0.17<br>(0.86) | -0.30<br>(0.77) | -0.39<br>(0.70) | 0.10<br>(4.18)   | 0.23<br>(3.40)   | 0.24<br>(3.88)  | 2.78<br>(3.09)  | 2.36<br>(2.43)   | 2.69<br>(2.78)   | 0.93 | 0.95 | 0.94 | 0.93 (0.87-0.96) | 0.95 (0.91-0.97) | 0.94 (0.89-0.97) |
| Right banks superior temporal sulcus   | 1.86<br>(0.34)  | 1.84<br>(0.37)  | 1.83<br>(0.31)  | 1.86<br>(0.35)  | 18.28 | 19.97 | 16.81 | 19.08 | 1.03<br>(0.31)  | 2.04<br>(0.05)  | -0.15<br>(0.88) | -1.21<br>(6.18)  | -1.18<br>(4.90)  | 0.11<br>(5.99)  | 4.37<br>(4.48)  | 3.69<br>(3.39)   | 4.27<br>(4.14)   | 0.95 | 0.97 | 0.95 | 0.94 (0.90-0.97) | 0.96 (0.93-0.98) | 0.95 (0.90-0.97) |
| Right caudal anterior cingulate cortex | 1.81<br>(0.38)  | 1.82<br>(0.39)  | 1.80<br>(0.38)  | 1.79<br>(0.37)  | 21.17 | 21.62 | 21.00 | 20.92 | -0.92<br>(0.36) | 0.96<br>(0.34)  | 1.23<br>(0.23)  | 0.53<br>(5.07)   | -0.46<br>(3.35)  | -0.95<br>(5.62) | 3.63<br>(3.54)  | 2.59<br>(2.14)   | 3.89<br>(4.12)   | 0.98 | 0.99 | 0.97 | 0.98 (0.96-0.99) | 0.99 (0.98-0.99) | 0.97 (0.94-0.98) |
| Right caudal middle frontal gyrus      | 5.12<br>(0.95)  | 5.08<br>(0.99)  | 5.12<br>(0.98)  | 5.14<br>(0.96)  | 18.58 | 19.39 | 19.12 | 18.67 | 1.84<br>(0.07)  | -0.04<br>(0.97) | -0.97<br>(0.34) | -0.90<br>(3.14)  | -0.08<br>(2.53)  | 0.40<br>(2.78)  | 1.96<br>(2.59)  | 1.94<br>(1.60)   | 2.12<br>(1.82)   | 0.99 | 0.99 | 0.99 | 0.99 (0.98-0.99) | 0.99 (0.99-1.00) | 0.99 (0.98-0.99) |
| Right cuneus                           | 3.03<br>(0.60)  | 3.10<br>(0.62)  | 3.05<br>(0.55)  | 3.07<br>(0.59)  | 19.73 | 20.06 | 17.98 | 19.31 | -1.50<br>(0.14) | -0.51<br>(0.61) | -1.55<br>(0.13) | 2.24<br>(9.70)   | 0.78<br>(6.60)   | 1.36<br>(6.01)  | 3.88<br>(9.15)  | 3.45<br>(5.65)   | 3.14<br>(5.29)   | 0.87 | 0.95 | 0.96 | 0.87 (0.77-0.93) | 0.95 (0.91-0.97) | 0.96 (0.93-0.98) |
| Right entorhinal cortex                | 1.67<br>(0.44)  | 1.65<br>(0.43)  | 1.65<br>(0.46)  | 1.72<br>(0.44)  | 26.18 | 26.17 | 27.94 | 25.76 | 0.66<br>(0.51)  | 0.67<br>(0.50)  | -1.52<br>(0.14) | -1.03<br>(11.77) | -1.82<br>(14.94) | 3.26<br>(15.98) | 8.52<br>(8.08)  | 10.06<br>(11.09) | 10.36<br>(12.51) | 0.92 | 0.87 | 0.86 | 0.92 (0.85-0.95) | 0.87 (0.78-0.93) | 0.86 (0.75-0.92) |
| Right fusiform gyrus                   | 7.96<br>(1.14)  | 7.96<br>(1.15)  | 7.98<br>(1.09)  | 7.98<br>(1.13)  | 14.32 | 14.49 | 13.69 | 14.15 | 0.20<br>(0.84)  | -0.54<br>(0.59) | -0.74<br>(0.47) | -0.07<br>(2.56)  | 0.31<br>(2.60)   | 0.32<br>(2.74)  | 1.84<br>(1.76)  | 1.94<br>(1.74)   | 2.14<br>(1.71)   | 0.99 | 0.99 | 0.98 | 0.99 (0.98-0.99) | 0.99 (0.97-0.99) | 0.99 (0.97-0.99) |
| Right inferior parietal cortex         | 11.46<br>(2.10) | 11.37<br>(2.20) | 11.39<br>(2.06) | 11.48<br>(2.15) | 18.32 | 19.36 | 18.05 | 18.70 | 1.09<br>(0.28)  | 1.41<br>(0.17)  | -0.48<br>(0.64) | -1.01<br>(5.77)  | -0.57<br>(2.62)  | 0.13<br>(2.74)  | 2.67<br>(5.21)  | 1.90<br>(1.87)   | 1.80<br>(2.05)   | 0.97 | 0.99 | 0.99 | 0.97 (0.94-0.98) | 0.99 (0.98-0.99) | 0.99 (0.98-0.99) |
| Right inferior temporal gyrus          | 9.04<br>(1.67)  | 9.00<br>(1.63)  | 9.04<br>(1.63)  | 9.05<br>(1.64)  | 18.50 | 18.13 | 18.00 | 18.08 | 1.06<br>(0.30)  | 0.16<br>(0.88)  | -0.25<br>(0.80) | -0.39<br>(3.09)  | -0.02<br>(3.44)  | 0.14<br>(3.03)  | 2.15<br>(2.23)  | 2.25<br>(2.58)   | 2.22<br>(2.04)   | 0.99 | 0.99 | 0.99 | 0.99 (0.98-0.99) | 0.99 (0.97-0.99) | 0.99 (0.98-0.99) |
| Right isthmus cingulate cortex         | 2.07<br>(0.41)  | 2.05<br>(0.41)  | 2.05<br>(0.44)  | 2.06<br>(0.44)  | 19.95 | 19.83 | 21.56 | 21.59 | 1.24<br>(0.22)  | 1.32<br>(0.19)  | 0.82<br>(0.42)  | -1.04<br>(5.61)  | -1.62<br>(6.91)  | -1.09<br>(6.48) | 4.13<br>(3.88)  | 4.75<br>(5.23)   | 4.52<br>(4.72)   | 0.96 | 0.96 | 0.96 | 0.96 (0.93-0.98) | 0.96 (0.93-0.98) | 0.96 (0.93-0.98) |
| Right lateral occipital cortex         | 10.87<br>(1.60) | 10.85<br>(1.75) | 10.87<br>(1.59) | 10.95<br>(1.68) | 14.69 | 16.14 | 14.64 | 15.34 | 0.37<br>(0.71)  | 0.17<br>(0.86)  | -1.96<br>(0.06) | -0.48<br>(5.13)  | -0.07<br>(3.11)  | 0.57<br>(2.24)  | 2.23<br>(4.63)  | 2.06<br>(2.32)   | 1.62<br>(1.63)   | 0.96 | 0.98 | 0.99 | 0.96 (0.93-0.98) | 0.98 (0.96-0.99) | 0.99 (0.98-0.99) |
| Right lateral orbitofrontal cortex     | 6.52<br>(0.72)  | 6.56<br>(0.76)  | 6.54<br>(0.72)  | 6.56<br>(0.73)  | 11.09 | 11.52 | 10.98 | 11.18 | -1.08<br>(0.29) | -0.67<br>(0.50) | -1.17<br>(0.25) | 0.57<br>(3.58)   | 0.34<br>(2.97)   | 0.62<br>(3.54)  | 2.69<br>(2.39)  | 2.19<br>(2.00)   | 2.82<br>(2.18)   | 0.95 | 0.96 | 0.95 | 0.95 (0.90-0.97) | 0.96 (0.93-0.98) | 0.95 (0.91-0.97) |
| Right lingual gyrus                    | 6.59<br>(1.11)  | 6.60<br>(1.09)  | 6.59<br>(1.09)  | 6.59<br>(1.10)  | 16.90 | 16.45 | 16.57 | 16.62 | -0.11<br>(0.91) | 0.13<br>(0.89)  | 0.11<br>(0.92)  | 0.14<br>(3.65)   | -0.01<br>(2.21)  | 0.04<br>(1.94)  | 2.07<br>(2.99)  | 1.64<br>(1.46)   | 1.47<br>(1.25)   | 0.98 | 0.99 | 0.99 | 0.98 (0.96-0.99) | 0.99 (0.98-1.00) | 0.99 (0.99-1.00) |
| Right medial orbitofrontal cortex      | 4.74<br>(0.52)  | 4.72<br>(0.50)  | 4.71<br>(0.50)  | 4.74<br>(0.50)  | 11.04 | 10.67 | 10.70 | 10.64 | 0.56<br>(0.58)  | 1.05<br>(0.30)  | 0.00<br>(1.00)  | -0.29<br>(3.83)  | -0.51<br>(3.32)  | 0.04<br>(3.85)  | 2.93<br>(2.44)  | 2.64<br>(2.04)   | 3.08<br>(2.27)   | 0.94 | 0.95 | 0.94 | 0.94 (0.89-0.96) | 0.95 (0.92-0.97) | 0.94 (0.89-0.97) |
| Right middle temporal gyrus            | 10.18<br>(1.51) | 10.15<br>(1.57) | 10.19<br>(1.53) | 10.18<br>(1.55) | 14.82 | 15.50 | 14.98 | 15.20 | 0.61<br>(0.55)  | -0.71<br>(0.48) | -0.01<br>(1.00) | -0.39<br>(3.43)  | 0.13<br>(1.43)   | -0.08<br>(2.26) | 1.74<br>(2.96)  | 1.08<br>(0.93)   | 1.70<br>(1.47)   | 0.98 | 1.00 | 0.99 | 0.98 (0.97-0.99) | 1.00 (0.99-1.00) | 0.99 (0.98-0.99) |
| Right parahippocampal gyrus            | 1.74<br>(0.31)  | 1.74<br>(0.29)  | 1.75<br>(0.31)  | 1.75<br>(0.30)  | 17.85 | 16.83 | 17.88 | 16.94 | 0.04<br>(0.97)  |                 |                 |                  |                  |                 |                 |                  |                  |      |      |      |                  |                  |                  |

|                                         |                 |                 |                 |                 |       |       |       |       |                 |                 |                 |                 |                 |                  |                |                |                |      |      |      |                  |                  |                  |
|-----------------------------------------|-----------------|-----------------|-----------------|-----------------|-------|-------|-------|-------|-----------------|-----------------|-----------------|-----------------|-----------------|------------------|----------------|----------------|----------------|------|------|------|------------------|------------------|------------------|
| Right pars triangularis                 | 3.63<br>(0.60)  | 3.62<br>(0.60)  | 3.62<br>(0.57)  | 3.63<br>(0.59)  | 16.47 | 16.44 | 15.89 | 16.16 | 0.38<br>(0.70)  | 0.81<br>(0.42)  | 0.11<br>(0.91)  | -0.17<br>(2.78) | -0.26<br>(3.01) | 0.00<br>(2.53)   | 2.15<br>(1.73) | 2.29<br>(1.95) | 1.96<br>(1.57) | 0.99 | 0.98 | 0.99 | 0.99 (0.97-0.99) | 0.98 (0.97-0.99) | 0.99 (0.98-0.99) |
| Right pericalcarine cortex              | 2.24<br>(0.42)  | 2.19<br>(0.41)  | 2.19<br>(0.39)  | 2.20<br>(0.38)  | 18.72 | 18.54 | 17.81 | 17.39 | 1.55<br>(0.13)  | 2.12<br>(0.04)  | 1.51<br>(0.14)  | -2.05<br>(8.88) | -2.01<br>(6.23) | -1.38<br>(6.63)  | 3.93<br>(8.21) | 3.92<br>(5.21) | 3.67<br>(5.67) | 0.89 | 0.93 | 0.93 | 0.88 (0.79-0.93) | 0.93 (0.86-0.96) | 0.92 (0.86-0.96) |
| Right postcentral gyrus                 | 8.19<br>(1.15)  | 8.17<br>(1.17)  | 8.15<br>(1.17)  | 8.18<br>(1.15)  | 14.01 | 14.36 | 14.36 | 14.01 | 0.55<br>(0.59)  | 1.99<br>(0.05)  | 0.35<br>(0.72)  | -0.21<br>(1.99) | -0.51<br>(1.56) | -0.10<br>(1.65)  | 1.22<br>(1.57) | 1.30<br>(0.99) | 1.30<br>(0.99) | 0.99 | 0.99 | 0.99 | 0.99 (0.98-1.00) | 0.99 (0.99-1.00) | 0.99 (0.99-1.00) |
| Right posterior cingulate cortex        | 2.66<br>(0.59)  | 2.69<br>(0.59)  | 2.66<br>(0.61)  | 2.66<br>(0.61)  | 22.31 | 21.83 | 22.77 | 22.85 | -0.91<br>(0.37) | -0.32<br>(0.75) | -0.10<br>(0.92) | 1.15<br>(8.62)  | 0.04<br>(6.48)  | -0.05<br>(10.29) | 5.24<br>(6.90) | 3.62<br>(5.35) | 5.73<br>(8.50) | 0.94 | 0.97 | 0.92 | 0.94 (0.89-0.97) | 0.97 (0.94-0.98) | 0.92 (0.86-0.96) |
| Right precentral gyrus                  | 12.17<br>(1.58) | 12.18<br>(1.55) | 12.12<br>(1.54) | 12.16<br>(1.59) | 12.95 | 12.70 | 12.70 | 13.07 | -0.17<br>(0.87) | 1.77<br>(0.08)  | 0.39<br>(0.69)  | 0.07<br>(1.83)  | -0.45<br>(1.68) | -0.12<br>(1.62)  | 1.57<br>(0.91) | 1.43<br>(0.97) | 1.25<br>(1.02) | 0.99 | 0.99 | 0.99 | 0.99 (0.98-0.99) | 0.99 (0.98-0.99) | 0.99 (0.99-1.00) |
| Right precuneus                         | 8.59<br>(1.21)  | 8.56<br>(1.21)  | 8.55<br>(1.22)  | 8.56<br>(1.24)  | 14.04 | 14.15 | 14.28 | 14.53 | 1.58<br>(0.12)  | 2.37<br>(0.02)  | 1.75<br>(0.09)  | -0.44<br>(1.75) | -0.59<br>(1.53) | -0.49<br>(1.52)  | 1.25<br>(1.29) | 1.24<br>(1.06) | 1.25<br>(0.98) | 0.99 | 0.99 | 0.99 | 0.99 (0.98-1.00) | 0.99 (0.99-1.00) | 0.99 (0.99-1.00) |
| Right rostral anterior cingulate cortex | 1.86<br>(0.44)  | 1.86<br>(0.44)  | 1.86<br>(0.45)  | 1.87<br>(0.44)  | 23.47 | 23.81 | 24.24 | 23.49 | -0.19<br>(0.85) | 0.42<br>(0.67)  | -0.36<br>(0.72) | -0.05<br>(4.15) | -0.52<br>(4.66) | 0.16<br>(4.02)   | 3.41<br>(2.30) | 3.58<br>(2.97) | 3.00<br>(2.64) | 0.98 | 0.98 | 0.99 | 0.98 (0.97-0.99) | 0.98 (0.96-0.99) | 0.99 (0.97-0.99) |
| Right rostral middle frontal gyrus      | 13.51<br>(1.63) | 13.52<br>(1.69) | 13.54<br>(1.63) | 13.54<br>(1.64) | 12.04 | 12.48 | 12.01 | 12.11 | -0.15<br>(0.88) | -1.00<br>(0.32) | -0.95<br>(0.35) | 0.00<br>(2.30)  | 0.25<br>(1.65)  | 0.23<br>(1.82)   | 1.58<br>(1.65) | 1.36<br>(0.95) | 1.42<br>(1.15) | 0.98 | 0.99 | 0.99 | 0.98 (0.97-0.99) | 0.99 (0.98-1.00) | 0.99 (0.98-0.99) |
| Right superior frontal gyrus            | 19.01<br>(2.74) | 18.91<br>(2.71) | 19.01<br>(2.73) | 19.01<br>(2.76) | 14.42 | 14.32 | 14.36 | 14.54 | 1.30<br>(0.20)  | 0.04<br>(0.97)  | 0.06<br>(0.95)  | -0.51<br>(2.66) | 0.00<br>(1.54)  | -0.04<br>(1.76)  | 1.55<br>(2.21) | 1.04<br>(1.13) | 1.31<br>(1.15) | 0.98 | 0.99 | 0.99 | 0.98 (0.97-0.99) | 0.99 (0.99-1.00) | 0.99 (0.99-1.00) |
| Right superior parietal cortex          | 11.24<br>(1.67) | 11.17<br>(1.70) | 11.24<br>(1.24) | 11.28<br>(1.68) | 14.84 | 15.19 | 14.85 | 14.91 | 1.57<br>(0.12)  | 0.04<br>(0.97)  | -1.79<br>(0.08) | -0.65<br>(2.95) | -0.03<br>(2.30) | 0.33<br>(1.14)   | 1.58<br>(2.57) | 1.51<br>(1.71) | 0.96<br>(0.68) | 0.99 | 0.99 | 1.00 | 0.99 (0.97-0.99) | 0.99 (0.98-0.99) | 1.00 (0.99-1.00) |
| Right superior temporal gyrus           | 10.11<br>(1.18) | 10.07<br>(1.23) | 10.13<br>(1.20) | 10.07<br>(1.22) | 11.64 | 12.18 | 11.87 | 12.12 | 1.20<br>(0.24)  | -0.43<br>(0.67) | 1.18<br>(0.25)  | -0.49<br>(2.37) | 0.13<br>(2.27)  | -0.45<br>(2.36)  | 1.72<br>(1.68) | 1.81<br>(1.34) | 1.64<br>(1.74) | 0.98 | 0.98 | 0.98 | 0.98 (0.96-0.99) | 0.98 (0.97-0.99) | 0.98 (0.97-0.99) |
| Right supramarginal gyrus               | 8.76<br>(1.18)  | 8.73<br>(1.20)  | 8.73<br>(1.18)  | 8.77<br>(1.17)  | 13.53 | 13.72 | 13.54 | 13.32 | 0.59<br>(0.56)  | 1.05<br>(0.30)  | -0.72<br>(0.48) | -0.30<br>(3.24) | -0.26<br>(1.69) | 0.23<br>(1.82)   | 2.05<br>(2.51) | 1.32<br>(1.07) | 1.47<br>(1.08) | 0.97 | 0.99 | 0.99 | 0.97 (0.95-0.99) | 0.99 (1.00)      | 0.99 (0.98-0.99) |
| Right frontal pole                      | 1.03<br>(0.13)  | 1.03<br>(0.11)  | 1.06<br>(0.15)  | 1.02<br>(0.13)  | 12.66 | 10.94 | 14.02 | 13.03 | 0.21<br>(0.84)  | -1.76<br>(0.08) | 1.67<br>(0.10)  | -0.03<br>(7.67) | 1.97<br>(9.00)  | -1.52<br>(6.12)  | 5.79<br>(4.95) | 6.30<br>(6.65) | 4.86<br>(3.95) | 0.81 | 0.82 | 0.89 | 0.80 (0.67-0.89) | 0.81 (0.67-0.89) | 0.89 (0.81-0.94) |
| Right temporal pole                     | 2.34<br>(0.30)  | 2.30<br>(0.31)  | 2.29<br>(0.34)  | 2.36<br>(0.31)  | 12.88 | 13.39 | 14.74 | 13.03 | 1.76<br>(0.09)  | 1.54<br>(0.13)  | -1.10<br>(0.28) | -1.80<br>(6.69) | -2.26<br>(8.51) | 0.91<br>(5.86)   | 5.10<br>(4.62) | 6.75<br>(5.56) | 4.80<br>(3.40) | 0.88 | 0.82 | 0.91 | 0.88 (0.79-0.93) | 0.81 (0.67-0.89) | 0.90 (0.83-0.95) |
| Right transverse temporal gyrus         | 0.82<br>(0.16)  | 0.81<br>(0.15)  | 0.82<br>(0.16)  | 0.83<br>(0.16)  | 19.75 | 18.47 | 18.95 | 19.06 | 1.73<br>(0.09)  | 0.89<br>(0.38)  | -0.51<br>(0.61) | -0.99<br>(4.76) | -0.40<br>(3.81) | 0.43<br>(3.71)   | 3.86<br>(2.89) | 3.36<br>(1.77) | 3.16<br>(1.92) | 0.97 | 0.98 | 0.98 | 0.97 (0.94-0.98) | 0.98 (0.97-0.99) | 0.98 (0.97-0.99) |
| Right insula                            | 6.58<br>(0.73)  | 6.51<br>(0.80)  | 6.53<br>(0.77)  | 6.56<br>(0.83)  | 11.16 | 12.34 | 11.81 | 12.60 | 1.42<br>(0.16)  | 0.99<br>(0.33)  | 0.40<br>(0.69)  | -1.11<br>(4.36) | -0.76<br>(4.32) | -0.47<br>(4.95)  | 3.29<br>(3.03) | 3.34<br>(2.80) | 3.99<br>(2.91) | 0.93 | 0.92 | 0.92 | 0.93 (0.87-0.96) | 0.92 (0.86-0.96) | 0.92 (0.85-0.95) |

**Local cortical surface (cm<sup>2</sup>)**

|                                       |                 |                 |                 |                 |       |       |       |       |                 |                 |                 |                 |                 |                 |                |                 |                 |      |      |      |                  |                  |                  |
|---------------------------------------|-----------------|-----------------|-----------------|-----------------|-------|-------|-------|-------|-----------------|-----------------|-----------------|-----------------|-----------------|-----------------|----------------|-----------------|-----------------|------|------|------|------------------|------------------|------------------|
| Left banks superior temporal sulcus   | 8.45<br>(1.30)  | 8.38<br>(1.25)  | 8.41<br>(1.26)  | 8.49<br>(1.33)  | 15.34 | 14.96 | 14.96 | 15.70 | 1.12<br>(0.27)  | 0.86<br>(0.39)  | -0.86<br>(0.39) | -0.83<br>(5.55) | -0.42<br>(4.10) | 0.41<br>(4.00)  | 3.51<br>(4.35) | 2.66<br>(3.12)  | 2.67<br>(2.98)  | 0.94 | 0.97 | 0.97 | 0.94 (0.90-0.97) | 0.97 (0.95-0.99) | 0.97 (0.95-0.98) |
| Left caudal anterior cingulate cortex | 5.63<br>(1.32)  | 5.72<br>(1.20)  | 5.64<br>(1.23)  | 5.75<br>(1.24)  | 23.48 | 21.04 | 21.74 | 21.51 | -1.30<br>(0.20) | -0.09<br>(0.93) | -1.68<br>(0.10) | 2.32<br>(11.49) | 0.83<br>(11.66) | 2.70<br>(11.23) | 6.38<br>(9.79) | 5.58<br>(10.24) | 5.53<br>(10.12) | 0.94 | 0.94 | 0.94 | 0.94 (0.89-0.97) | 0.94 (0.89-0.97) | 0.94 (0.89-0.97) |
| Left caudal middle frontal gyrus      | 19.79<br>(3.30) | 19.74<br>(3.39) | 19.74<br>(3.32) | 19.79<br>(3.39) | 16.66 | 17.19 | 16.85 | 17.13 | 0.81<br>(0.42)  | 0.95<br>(0.35)  | -0.02<br>(0.98) | -0.33<br>(2.05) | -0.31<br>(2.09) | -0.06<br>(2.16) | 1.50<br>(1.42) | 1.45<br>(1.51)  | 1.72<br>(1.28)  | 0.99 | 0.99 | 0.99 | 0.99 (0.99-1.00) | 0.99 (0.99-1.00) | 0.99 (0.99-1.00) |
| Left cuneus                           | 14.27<br>(1.98) | 14.27<br>(2.12) | 14.41<br>(2.02) | 14.31<br>(2.04) | 13.88 | 14.83 | 14.04 | 14.24 | 0.05<br>(0.96)  | -2.02<br>(0.05) | -0.88<br>(0.38) | -0.15<br>(3.36) | 0.91<br>(3.19)  | 0.21<br>(1.95)  | 2.29<br>(2.44) | 2.41<br>(2.25)  | 1.57<br>(1.16)  | 0.98 | 0.98 | 0.99 | 0.98 (0.96-0.99) | 0.98 (0.95-0.99) | 0.99 (0.98-1.00) |
| Left entorhinal cortex                | 4.02<br>(1.04)  | 4.08<br>(0.96)  | 4.18<br>(0.96)  | 4.11<br>(0.94)  | 25.96 | 23.63 | 22.89 | 22.98 | -0.95<br>(0.35) | -2.10<br>(0.04) | -1.69<br>(0.10) | 2.00<br>(10.97) | 4.42<br>(13.20) | 2.94<br>(9.76)  | 8.52<br>(7.08) | 8.23<br>(11.17) | 6.17<br>(8.07)  | 0.92 | 0.88 | 0.95 | 0.92 (0.85-0.95) | 0.87 (0.76-0.93) | 0.94 (0.89-0.97) |
| Left fusiform gyrus                   | 28.13<br>(4.08) | 28.34<br>(4.04) | 28.12<br>(4.04) | 28.29<br>(3.94) | 14.49 | 14.27 | 14.37 | 13.93 | -1.76<br>(0.09) | 0.11<br>(0.91)  | -1.59<br>(0.12) | 0.82<br>(3.06)  | -0.01<br>(1.94) | 0.65<br>(2.49)  | 2.35<br>(2.10) | 1.58<br>(1.10)  | 1.91<br>(1.71)  | 0.98 | 0.99 | 0.99 | 0.98 (0.96-0.99) | 0.99 (0.98-1.00) | 0.99 (0.97-0.99) |
| Left inferior parietal cortex         | 38.37<br>(6.77) | 37.97<br>(6.78) | 38.21<br>(6.78) | 38.52<br>(6.69) | 17.64 | 17.85 | 17.74 | 17.36 | 1.58<br>(0.12)  | 1.47<br>(0.15)  | -1.25<br>(0.22) | -1.17<br>(5.18) | -0.44<br>(1.84) | 0.44<br>(2.20)  | 2.26<br>(4.79) | 1.55<br>(1.06)  | 1.77<br>(1.35)  | 0.97 | 0.99 | 0.99 | 0.97 (0.94-0.98) | 0.99 (0.99-1.00) | 0.99 (0.99-1.00) |
| Left inferior temporal gyrus          | 29.12<br>(4.54) | 29.31<br>(4.40) | 29.22<br>(4.53) | 29.42<br>(4.39) | 15.58 | 15.00 | 15.51 | 14.91 | -1.71<br>(0.09) | -1.10<br>(0.28) | -3.15<br>(0.00) | 0.78<br>(2.94)  | 0.37<br>(2.16)  | 1.14<br>(2.33)  | 1.85<br>(2.41) | 1.72<br>(1.33)  | 1.95<br>(1.69)  | 0.99 | 0.99 | 0.99 | 0.99 (0.97-0.99) | 0.99 (0.98-1.00) | 0.99 (0.97-0.99) |
| Left isthmus cingulate cortex         | 9.41<br>(1.53)  | 9.46<br>(1.48)  | 9.41<br>(1.51)  | 9.48<br>(1.49)  | 16.23 | 15.67 | 16.05 | 15.76 | -0.63<br>(0.53) | 0.09<br>(0.93)  | -1.06<br>(0.29) | 0.61<br>(5.36)  | -0.01<br>(3.89) | 0.76<br>(4.43)  | 3.92<br>(3.67) | 2.80<br>(2.66)  | 3.00<br>(3.32)  | 0.95 | 0.97 | 0.96 | 0.95 (0.91-0.97) | 0.97 (0.95-0.99) | 0.96 (0.93-0.98) |
| Left lateral occipital cortex         | 46.84<br>(5.62) | 46.85<br>(6.13) | 46.92<br>(5.49) | 46.94<br>(5.71) | 12.00 | 13.09 | 11.70 | 12.16 | -0.05<br>(0.96) | -0.69<br>(0.50) | -0.84<br>(0.41) | -0.11<br>(4.09) | 0.22<br>(1.72)  | 0.21<br>(1.85)  | 1.84<br>(3.64) | 1.42<br>(0.96)  | 1.30<br>(1.32)  | 0.96 | 0.99 | 0.99 | 0.96 (0.93-0.98) | 0.99 (0.98-0.99) | 0.99 (0.98-0.99) |
| Left lateral orbitofrontal cortex     | 24.50<br>(3.06) | 24.63<br>(3.12) | 24.45<br>(3.14) | 24.63<br>(3.13) | 12.49 | 12.66 | 12.85 | 12.73 | -1.84<br>(0.07) | 0.86<br>(0.40)  | -2.38<br>(0.02) | 0.49<br>(1.88)  | -0.27<br>(1.66) | 0.50<br>(1.40)  | 1.37<br>(1.37) | 1.29<br>(1.05)  | 1.15<br>(0.93)  | 0.99 | 0.99 | 0.99 | 0.99 (0.98-0.99) | 0.99 (0.98-1.00) | 0.99 (0.99-1.00) |
| Left lingual gyrus                    | 29.60<br>(4.04) | 29.57<br>(4.13) | 29.68<br>(4.14) | 29.62<br>(3.96) | 13.66 | 13.97 | 13.93 | 13.36 | 0.27<br>(0.79)  | -0.91<br>(0.37) | -0.23<br>(0.82) | -0.13<br>(2.06) | 0.25<br>(1.94)  | 0.12<br>(1.97)  | 1.74<br>(1.07) | 1.61<br>(1.09)  | 1.59<br>(1.13)  | 0.99 | 0.99 | 0.99 | 0.99 (0.98-0.99) | 0.99 (0.98-0.99) | 0.99 (0.98-0.99) |
| Left medial orbitofrontal cortex      | 18.55<br>(2.55) | 18.46<br>(2.56) | 18.31<br>(2.40) | 18.58<br>(2.45) | 13.76 | 13.87 | 13.09 | 13.17 | 0.43<br>(0.67)  | 1.43<br>(0.16)  | -0.86<br>(0.86) | -0.51<br>(7.62) | -1.15<br>(6.00) | 0.26<br>(6.94)  | 5.88<br>(4.80) | 4.82<br>(3.68)  | 5.06<br>(4.70)  | 0.86 | 0.91 | 0.88 | 0.86 (0.75-0.92) | 0.90 (0.83-0.95) | 0.88 (0.79-0.93) |
| Left middle temporal gyrus            | 27.49<br>(4.08) | 27.69<br>(4.13) | 27.41<br>(4.14) | 27.64<br>(4.10) | 14.84 | 14.91 | 15.12 | 14.84 | -2.29<br>(0.03) | 1.18<br>(0.24)  | -1.86<br>(0.07) | 0.72<br>(2.22)  | -0.36<br>(1.85) | 0.54<br>(1.95)  | 1.75<br>(1.52) | 1.44<br>(1.20)  | 1.58<br>(1.24)  | 0.99 | 0.99 | 0.99 | 0.99 (0.98-0.99) | 0.99 (0.99-1.00) | 0.99 (0.98-1.00) |
| Left parahippocampal gyrus            | 5.97<br>(0.83)  | 6.04<br>(0.80)  | 6.02<br>(0.78)  | 6.08<br>(0.90)  | 13.93 | 13.22 | 12.89 | 14.74 | -2.00<br>(0.05) | -1.32<br>(0.19) | -2.73<br>(0.01) | 1.28<br>(4.20)  | 0.91<br>(4.02)  | 1.74<br>(4.16)  | 3.34<br>(2.82) | 3.04<br>(2.75)  | 3.43<br>(2.89)  | 0.96 | 0.96 | 0.96 | 0.95 (0.92-0.98) | 0.96 (0.93-0.98) | 0.95 (0.89-0.97) |
| Left paracentral lobule               | 12.93<br>(1.77) | 12.88<br>(1.82) | 12.94<br>(1.82) | 12.89<br>(1.81) | 13.65 | 14.16 | 14.08 | 14.05 | 1.31<br>(0.20)  | -0.09<br>(0.93) | 1.28<br>(0.21)  | -0.48<br>(2.04) | 0.00<br>(2.01)  | -0.39<br>(1.77) | 1.75<br>(1.13) | 1.62<br>(1.16)  | 1.43<br>(1.09)  | 0.99 | 0.99 | 0.99 | 0.99 (0.98-0.99) | 0.99 (0.98-0.99) | 0.99 (0.98-1.00) |
| Left pars opercularis                 | 14.13<br>(2.03) | 14.30<br>(2.04) | 14.17<br>(2.10) | 14.21<br>(2.03) | 14.35 | 14.29 | 14.81 | 14.29 | -2.87<br>(0.01) | -0.66<br>(0.51) | -1.76<br>(0.09) | 1.18<br>(2.53)  | 0.23<br>(3.03)  | 0.59<br>(2.06)  | 2.20<br>(1.68) | 2.18<br>(2.09)  | 1.77<br>(1.17)  | 0.98 | 0.98 | 0.99 | 0.98 (0.96-0.99) | 0.98 (0.96-0.99) | 0.99 (0.98-0.99) |
| Left pars orbitalis                   | 6.36<br>(1.03)  | 6.37<br>(1.07)  | 6.37<br>(1.03)  | 6.37<br>(1.03)  | 16.18 | 16.82 | 16.14 | 16.14 | -0.30<br>(0.76) | -0.51<br>(0.61) | -0.44<br>(0.66) | 0.05<br>(3.63)  | 0.24<br>(3.34)  | 0.22<br>(3.44)  | 2.89<br>(2.15) | 2.48<br>(2.21)  | 2.66<br>(2.17)  | 0.98 | 0.98 | 0.98 | 0.98 (0.96-0.99) | 0.98 (0.96-0.99) | 0.98 (0.96-0.99) |
| Left pars triangularis                | 12.11<br>(1.78) | 12.11<br>(1.79) | 12.09<br>(1.81) | 12.13<br>(1.78) | 14.69 | 14.81 | 14.96 | 14.64 | 0.19<br>(0.85)  | 0.48<br>(0.63)  | -0.20<br>(0.84) | -0.08<br>(2.28) | -0.25<br>(2.83) | 0.10<br>(3.00)  | 1.91<br>(1.22) | 2.20<br>(1.76)  | 2.37<br>(1.80)  | 0.99 | 0.98 | 0.98 | 0.99 (0.98-0.99) | 0.98 (0.96-0.99) |                  |



|                                        |                  |                  |                  |                  |       |       |       |       |                 |                 |                 |                 |                 |                 |                |                |                |      |      |      |                  |                  |                  |
|----------------------------------------|------------------|------------------|------------------|------------------|-------|-------|-------|-------|-----------------|-----------------|-----------------|-----------------|-----------------|-----------------|----------------|----------------|----------------|------|------|------|------------------|------------------|------------------|
| Left precentral gyrus                  | 46.24<br>(5.80)  | 46.22<br>(6.05)  | 46.30<br>(6.11)  | 46.23<br>(6.05)  | 12.54 | 13.09 | 13.21 | 13.09 | 0.13<br>(0.90)  | -0.43<br>(0.67) | 0.11<br>(0.91)  | -0.11<br>(1.96) | 0.05<br>(2.04)  | -0.09<br>(1.24) | 1.05<br>(1.65) | 1.09<br>(1.71) | 0.98<br>(0.75) | 0.99 | 0.99 | 1.00 | 0.99 (0.98-0.99) | 0.99 (0.98-0.99) | 1.00 (0.99-1.00) |
| Left precuneus                         | 34.36<br>(4.90)  | 34.23<br>(4.94)  | 34.32<br>(4.85)  | 34.35<br>(4.88)  | 14.26 | 14.44 | 14.13 | 14.22 | 1.06<br>(0.30)  | 0.64<br>(0.52)  | 0.20<br>(0.84)  | -0.43<br>(2.73) | -0.10<br>(1.37) | -0.03<br>(1.31) | 1.51<br>(2.31) | 1.07<br>(0.86) | 1.08<br>(0.74) | 0.99 | 1.00 | 1.00 | 0.99 (0.97-0.99) | 1.00 (0.99-1.00) | 1.00 (0.99-1.00) |
| Left rostral anterior cingulate cortex | 8.14<br>(2.02)   | 8.10<br>(1.80)   | 8.18<br>(2.00)   | 8.20<br>(2.03)   | 24.76 | 22.21 | 24.42 | 24.71 | 0.54<br>(0.59)  | -0.76<br>(0.45) | -0.83<br>(0.41) | 0.19<br>(6.11)  | 0.72<br>(4.92)  | 0.99<br>(6.15)  | 4.33<br>(4.27) | 3.68<br>(3.30) | 4.51<br>(4.24) | 0.97 | 0.98 | 0.97 | 0.97 (0.94-0.98) | 0.98 (0.97-0.99) | 0.97 (0.95-0.98) |
| Left rostral middle frontal gyrus      | 50.90<br>(8.25)  | 50.94<br>(8.28)  | 50.83<br>(8.03)  | 51.23<br>(7.96)  | 16.21 | 16.25 | 15.80 | 15.53 | -0.27<br>(0.78) | 0.52<br>(0.61)  | -2.31<br>(0.03) | 0.08<br>(1.93)  | -0.07<br>(1.83) | 0.76<br>(1.99)  | 1.49<br>(1.21) | 1.42<br>(1.14) | 1.66<br>(1.32) | 0.99 | 0.99 | 0.99 | 0.99 (0.99-1.00) | 0.99 (0.99-1.00) | 0.99 (0.99-1.00) |
| Left superior frontal gyrus            | 67.29<br>(10.69) | 67.31<br>(10.74) | 67.43<br>(10.67) | 67.46<br>(10.69) | 15.89 | 15.96 | 15.82 | 15.85 | -0.13<br>(0.89) | -1.39<br>(0.17) | -1.45<br>(0.15) | 0.01<br>(1.09)  | 0.22<br>(1.00)  | 0.26<br>(1.09)  | 0.86<br>(0.65) | 0.80<br>(0.63) | 0.84<br>(0.73) | 1.00 | 1.00 | 1.00 | 1.00 (1.00-1.00) | 1.00 (1.00-1.00) | 1.00 (1.00-1.00) |
| Left superior parietal cortex          | 49.15<br>(7.13)  | 48.92<br>(7.59)  | 49.05<br>(7.11)  | 49.16<br>(7.02)  | 14.50 | 15.51 | 14.50 | 14.27 | 1.05<br>(0.30)  | 1.07<br>(0.29)  | -0.12<br>(0.91) | -0.65<br>(3.98) | -0.18<br>(1.18) | 0.06<br>(1.24)  | 1.43<br>(3.77) | 1.03<br>(0.59) | 0.94<br>(0.79) | 0.98 | 1.00 | 1.00 | 0.98 (0.97-0.99) | 1.00 (0.99-1.00) | 1.00 (0.99-1.00) |
| Left superior temporal gyrus           | 36.75<br>(4.08)  | 36.80<br>(4.21)  | 36.72<br>(4.24)  | 36.84<br>(4.20)  | 11.11 | 11.45 | 11.54 | 11.40 | -0.64<br>(0.53) | 0.47<br>(0.64)  | -1.18<br>(0.24) | 0.10<br>(1.50)  | -0.15<br>(1.42) | 0.22<br>(1.42)  | 1.05<br>(1.06) | 1.04<br>(0.97) | 1.13<br>(0.87) | 0.99 | 0.99 | 0.99 | 0.99 (0.99-1.00) | 0.99 (0.99-1.00) | 0.99 (0.99-1.00) |
| Left supramarginal gyrus               | 36.71<br>(5.89)  | 36.75<br>(6.40)  | 36.74<br>(6.02)  | 36.84<br>(6.02)  | 16.05 | 17.42 | 16.38 | 16.35 | -0.14<br>(0.89) | -0.35<br>(0.73) | -1.58<br>(0.12) | -0.09<br>(3.60) | 0.03<br>(1.63)  | 0.31<br>(1.48)  | 1.92<br>(3.03) | 1.23<br>(1.06) | 1.17<br>(0.95) | 0.98 | 1.00 | 1.00 | 0.97 (0.95-0.99) | 1.00 (0.99-1.00) | 1.00 (0.99-1.00) |
| Left frontal pole                      | 2.44<br>(0.30)   | 2.42<br>(0.31)   | 2.43<br>(0.28)   | 2.42<br>(0.30)   | 12.37 | 12.99 | 11.53 | 12.31 | 0.70<br>(0.49)  | 0.37<br>(0.71)  | 0.82<br>(0.42)  | -0.92<br>(7.97) | -0.32<br>(7.37) | -0.75<br>(5.97) | 6.51<br>(4.59) | 5.71<br>(4.58) | 4.89<br>(3.42) | 0.81 | 0.82 | 0.88 | 0.81 (0.67-0.89) | 0.82 (0.69-0.90) | 0.88 (0.80-0.94) |
| Left temporal pole                     | 4.40<br>(0.59)   | 4.32<br>(0.55)   | 4.43<br>(0.62)   | 4.38<br>(0.58)   | 13.48 | 12.61 | 13.97 | 13.32 | 1.85<br>(0.07)  | -0.78<br>(0.44) | 0.28<br>(0.78)  | -1.54<br>(5.84) | 0.68<br>(6.10)  | -0.22<br>(5.88) | 4.86<br>(3.50) | 4.96<br>(3.53) | 4.70<br>(3.47) | 0.90 | 0.90 | 0.91 | 0.89 (0.81-0.94) | 0.90 (0.83-0.95) | 0.91 (0.84-0.95) |
| Left transverse temporal gyrus         | 4.22<br>(0.64)   | 4.25<br>(0.68)   | 4.24<br>(0.65)   | 4.22<br>(0.64)   | 15.13 | 15.96 | 15.28 | 15.10 | -1.10<br>(0.28) | -0.57<br>(0.57) | -0.24<br>(0.81) | 0.58<br>(4.18)  | 0.38<br>(4.62)  | 0.17<br>(3.94)  | 3.26<br>(2.64) | 3.57<br>(2.90) | 3.03<br>(2.48) | 0.97 | 0.95 | 0.96 | 0.96 (0.93-0.98) | 0.95 (0.91-0.97) | 0.96 (0.93-0.98) |
| Left insula                            | 23.45<br>(2.75)  | 23.60<br>(2.66)  | 23.48<br>(2.68)  | 23.55<br>(2.63)  | 11.74 | 11.27 | 11.39 | 11.18 | -0.59<br>(0.56) | -0.12<br>(0.90) | -0.38<br>(0.71) | 0.65<br>(6.40)  | 0.16<br>(6.37)  | 0.45<br>(6.85)  | 4.72<br>(4.31) | 4.38<br>(4.58) | 4.90<br>(4.74) | 0.83 | 0.85 | 0.81 | 0.83 (0.71-0.90) | 0.85 (0.74-0.92) | 0.81 (0.67-0.89) |
| Right banks superior temporal sulcus   | 7.83<br>(1.19)   | 7.80<br>(1.32)   | 7.76<br>(1.05)   | 7.88<br>(1.20)   | 15.26 | 16.88 | 13.56 | 15.24 | 0.45<br>(0.66)  | 1.75<br>(0.09)  | -0.84<br>(0.40) | -0.52<br>(5.20) | -0.68<br>(3.67) | 0.64<br>(4.28)  | 3.80<br>(3.53) | 2.70<br>(2.55) | 2.99<br>(3.09) | 0.94 | 0.98 | 0.96 | 0.94 (0.89-0.97) | 0.97 (0.94-0.98) | 0.96 (0.92-0.98) |
| Right caudal anterior cingulate cortex | 6.65<br>(1.37)   | 6.72<br>(1.43)   | 6.65<br>(1.32)   | 6.62<br>(1.33)   | 20.61 | 21.23 | 19.81 | 20.04 | -1.49<br>(0.14) | -0.03<br>(0.98) | 0.63<br>(0.53)  | 1.00<br>(5.08)  | 0.16<br>(3.59)  | -0.38<br>(4.83) | 4.04<br>(3.19) | 2.74<br>(2.29) | 3.72<br>(3.06) | 0.97 | 0.98 | 0.97 | 0.97 (0.95-0.98) | 0.98 (0.97-0.99) | 0.97 (0.94-0.98) |
| Right caudal middle frontal gyrus      | 19.27<br>(3.59)  | 19.20<br>(3.71)  | 19.33<br>(3.57)  | 19.33<br>(3.67)  | 18.65 | 19.33 | 18.49 | 18.98 | 1.02<br>(0.31)  | -0.84<br>(0.41) | -0.86<br>(0.40) | -0.53<br>(2.81) | 0.30<br>(2.36)  | 0.25<br>(2.49)  | 2.13<br>(1.88) | 1.77<br>(1.57) | 1.85<br>(1.67) | 0.99 | 0.99 | 0.99 | 0.99 (0.98-0.99) | 0.99 (0.99-1.00) | 0.99 (0.99-1.00) |
| Right cuneus                           | 15.35<br>(2.28)  | 15.47<br>(2.30)  | 15.33<br>(2.13)  | 15.47<br>(2.30)  | 14.85 | 14.90 | 13.92 | 14.85 | -1.45<br>(0.15) | 0.21<br>(0.83)  | -1.15<br>(0.26) | 0.72<br>(3.50)  | -0.07<br>(4.85) | 0.78<br>(4.72)  | 1.96<br>(2.97) | 2.82<br>(3.92) | 2.74<br>(3.90) | 0.97 | 0.94 | 0.95 | 0.97 (0.95-0.99) | 0.94 (0.89-0.97) | 0.95 (0.92-0.97) |
| Right entorhinal cortex                | 3.48<br>(0.70)   | 3.52<br>(0.73)   | 3.53<br>(0.73)   | 3.57<br>(0.79)   | 20.01 | 20.83 | 20.80 | 22.22 | -0.93<br>(0.36) | -0.88<br>(0.38) | -1.55<br>(0.13) | 0.90<br>(7.99)  | 1.27<br>(10.03) | 2.11<br>(10.66) | 6.32<br>(4.88) | 7.88<br>(6.21) | 7.63<br>(7.65) | 0.93 | 0.87 | 0.88 | 0.93 (0.88-0.96) | 0.87 (0.78-0.93) | 0.87 (0.77-0.93) |
| Right fusiform gyrus                   | 27.02<br>(3.53)  | 27.08<br>(3.63)  | 27.04<br>(3.58)  | 27.06<br>(3.56)  | 13.08 | 13.41 | 13.23 | 13.14 | -0.68<br>(0.50) | -0.23<br>(0.82) | -0.35<br>(0.73) | 0.17<br>(2.01)  | 0.05<br>(1.94)  | 0.13<br>(2.36)  | 1.44<br>(1.40) | 1.54<br>(1.16) | 1.90<br>(1.38) | 0.99 | 0.99 | 0.98 | 0.99 (0.98-0.99) | 0.99 (0.98-0.99) | 0.98 (0.97-0.99) |
| Right inferior parietal cortex         | 44.79<br>(7.25)  | 44.50<br>(7.73)  | 44.64<br>(7.05)  | 45.03<br>(7.31)  | 16.19 | 17.38 | 15.80 | 16.23 | 1.04<br>(0.30)  | 1.25<br>(0.22)  | -1.82<br>(0.08) | -0.86<br>(5.12) | -0.27<br>(1.77) | 0.53<br>(1.92)  | 2.08<br>(4.75) | 1.35<br>(1.16) | 1.41<br>(1.39) | 0.97 | 0.99 | 0.99 | 0.97 (0.95-0.98) | 0.99 (0.99-1.00) | 0.99 (0.99-1.00) |
| Right inferior temporal gyrus          | 28.38<br>(4.97)  | 28.34<br>(4.82)  | 28.42<br>(4.71)  | 28.45<br>(4.84)  | 17.52 | 17.00 | 16.56 | 17.00 | 0.32<br>(0.75)  | -0.25<br>(0.80) | -0.52<br>(0.61) | -0.09<br>(2.81) | 0.24<br>(3.15)  | 0.30<br>(3.06)  | 2.05<br>(1.89) | 2.23<br>(2.22) | 2.41<br>(1.87) | 0.99 | 0.98 | 0.98 | 0.99 (0.97-0.99) | 0.98 (0.97-0.99) | 0.98 (0.97-0.99) |
| Right isthmus cingulate cortex         | 8.32<br>(1.45)   | 8.34<br>(1.43)   | 8.31<br>(1.55)   | 8.36<br>(1.55)   | 17.41 | 17.13 | 18.67 | 18.53 | -0.39<br>(0.70) | 0.07<br>(0.94)  | -0.56<br>(0.58) | 0.29<br>(4.49)  | -0.30<br>(6.65) | 0.28<br>(6.22)  | 3.44<br>(2.85) | 4.40<br>(4.95) | 4.72<br>(3.99) | 0.97 | 0.95 | 0.95 | 0.97 (0.95-0.98) | 0.95 (0.91-0.97) | 0.95 (0.91-0.97) |
| Right lateral occipital cortex         | 46.03<br>(5.44)  | 45.80<br>(6.10)  | 46.11<br>(5.47)  | 46.27<br>(5.64)  | 11.83 | 13.32 | 11.87 | 12.19 | 0.73<br>(0.47)  | -0.76<br>(0.45) | -2.35<br>(0.02) | -0.72<br>(5.65) | 0.18<br>(1.65)  | 0.47<br>(1.50)  | 2.04<br>(5.30) | 1.21<br>(1.12) | 1.20<br>(1.00) | 0.94 | 0.99 | 0.99 | 0.94 (0.89-0.97) | 0.99 (0.98-0.99) | 0.99 (0.98-1.00) |
| Right lateral orbitofrontal cortex     | 24.57<br>(3.01)  | 25.16<br>(3.30)  | 25.01<br>(3.11)  | 24.85<br>(3.14)  | 12.23 | 13.13 | 12.45 | 12.62 | -3.15<br>(0.00) | -2.28<br>(0.03) | -1.26<br>(0.22) | 2.24<br>(4.63)  | 1.74<br>(4.82)  | 1.11<br>(6.00)  | 3.99<br>(3.21) | 3.92<br>(3.26) | 4.49<br>(4.07) | 0.93 | 0.92 | 0.89 | 0.91 (0.81-0.96) | 0.91 (0.83-0.95) | 0.89 (0.80-0.94) |
| Right lingual gyrus                    | 30.74<br>(4.43)  | 30.76<br>(4.40)  | 30.76<br>(4.26)  | 30.75<br>(4.50)  | 14.40 | 14.32 | 13.85 | 14.63 | -0.16<br>(0.88) | -0.24<br>(0.81) | -0.09<br>(0.93) | 0.06<br>(2.26)  | 0.14<br>(2.02)  | 0.00<br>(1.95)  | 1.79<br>(1.36) | 1.55<br>(1.28) | 1.42<br>(1.31) | 0.99 | 0.99 | 0.99 | 0.99 (0.98-0.99) | 0.99 (0.98-0.99) | 0.99 (0.98-0.99) |
| Right medial orbitofrontal cortex      | 18.57<br>(2.28)  | 18.63<br>(2.18)  | 18.56<br>(2.32)  | 18.54<br>(2.14)  | 12.26 | 11.69 | 12.50 | 11.55 | -0.40<br>(0.69) | 0.15<br>(0.88)  | 0.24<br>(0.81)  | 0.35<br>(4.47)  | -0.12<br>(4.17) | -0.08<br>(4.81) | 3.66<br>(2.54) | 3.26<br>(2.55) | 3.67<br>(3.06) | 0.93 | 0.94 | 0.92 | 0.93 (0.88-0.96) | 0.94 (0.90-0.97) | 0.92 (0.86-0.96) |
| Right middle temporal gyrus            | 31.03<br>(4.35)  | 30.99<br>(4.37)  | 31.12<br>(4.36)  | 31.21<br>(4.35)  | 14.03 | 14.11 | 14.00 | 13.92 | 0.52<br>(0.60)  | -1.11<br>(0.27) | -2.21<br>(0.03) | -0.17<br>(2.08) | 0.29<br>(1.74)  | 0.57<br>(1.69)  | 1.17<br>(1.72) | 1.47<br>(0.95) | 1.26<br>(1.25) | 0.99 | 0.99 | 0.99 | 0.99 (0.98-1.00) | 0.99 (0.99-1.00) | 0.99 (0.98-1.00) |
| Right parahippocampal gyrus            | 5.78<br>(0.72)   | 5.81<br>(0.70)   | 5.84<br>(0.68)   | 5.84<br>(0.73)   | 12.45 | 11.96 | 11.61 | 12.53 | -0.83<br>(0.41) | -1.92<br>(0.06) | -1.66<br>(0.10) | 0.73<br>(5.29)  | 1.25<br>(4.00)  | 1.15<br>(4.89)  | 3.82<br>(3.69) | 3.35<br>(2.47) | 3.84<br>(3.18) | 0.90 | 0.95 | 0.93 | 0.90 (0.83-0.95) | 0.95 (0.90-0.97) | 0.93 (0.87-0.96) |
| Right paracentral lobule               | 14.62<br>(2.09)  | 14.61<br>(2.03)  | 14.60<br>(2.08)  | 14.66<br>(2.10)  | 14.29 | 13.89 | 14.26 | 14.33 | 0.24<br>(0.81)  | 0.50<br>(0.62)  | -0.73<br>(0.47) | -0.03<br>(2.03) | -0.15<br>(2.03) | 0.22<br>(2.03)  | 1.52<br>(1.33) | 1.66<br>(1.15) | 1.66<br>(1.17) | 0.99 | 0.99 | 0.99 | 0.99 (0.98-0.99) | 0.99 (0.98-1.00) | 0.99 (0.98-0.99) |
| Right pars opercularis                 | 12.18<br>(1.93)  | 12.24<br>(2.10)  | 12.18<br>(1.90)  | 12.18<br>(1.97)  | 15.83 | 17.13 | 15.64 | 16.20 | -0.91<br>(0.37) | -0.02<br>(0.98) | -0.10<br>(0.92) | 0.35<br>(3.64)  | 0.03<br>(2.98)  | 0.01<br>(3.18)  | 2.69<br>(2.44) | 2.22<br>(1.95) | 2.59<br>(1.80) | 0.98 | 0.98 | 0.98 | 0.97 (0.95-0.99) | 0.98 (0.97-0.99) | 0.98 (0.97-0.99) |
| Right pars orbitalis                   | 7.59<br>(1.13)   | 7.56<br>(1.12)   | 7.56<br>(1.09)   | 7.54<br>(1.10)   | 14.91 | 14.81 | 14.42 | 14.53 | 0.81<br>(0.42)  | 0.77<br>(0.45)  | 1.22<br>(0.23)  | -0.32<br>(2.69) | -0.28<br>(2.93) | -0.50<br>(2.92) | 2.09<br>(1.70) | 2.42<br>(1.63) | 2.47<br>(1.59) | 0.98 | 0.98 | 0.98 | 0.98 (0.97-0.99) | 0.98 (0.96-0.99) | 0.98 (0.96-0.99) |
| Right pars triangularis                | 13.71<br>(2.23)  | 13.78<br>(2.30)  | 13.71<br>(2.21)  | 13.71<br>(2.26)  | 16.24 | 16.70 | 16.13 | 16.50 | -1.41<br>(0.17) | 0.02<br>(0.98)  | 0.00<br>(1.00)  | 0.40<br>(2.25)  | 0.01<br>(2.84)  | -0.05<br>(2.30) | 1.87<br>(1.29) | 2.24<br>(1.72) | 1.74<br>(1.48) | 0.99 | 0.99 | 0.99 | 0.99 (0.98-0.99) | 0.99 (0.97-0.99) | 0.99 (0.98-0.99) |
| Right pericalcarine cortex             | 14.90<br>(2.56)  | 14.74<br>(2.65)  | 14.73<br>(2.56)  | 14.78<br>(2.57)  | 17.16 | 18.00 | 17.35 | 17.35 | 1.22<br>(0.23)  | 1.82<br>(0.08)  | 1.41<br>(0.16)  | -1.27<br>(6.69) | -1.18<br>(4.23) | -0.83<br>(3.88) | 3.54<br>(5.80) | 2.89<br>(3.27) | 2.50<br>(3.05) | 0.94 | 0.97 | 0.98 | 0.94 (0.89-0.97) | 0.97 (0.94-0.98) | 0.98 (0.96-0.99) |
| Right postcentral gyrus                | 37.28<br>(4.98)  | 37.30<br>(5.00)  | 37.23<br>(4.95)  | 37.32<br>(4.90)  | 13.36 | 13.39 | 13.29 | 13.13 | -0.37<br>(0.71) | 0.62<br>(0.54)  | -0.72<br>(0.48) | 0.07<br>(1.33)  | -0.12<br>(1.33) | 0.15<br>(1.12)  | 1.07<br>(0.78) | 0.98<br>(0.90) | 0.82<br>(0.76) | 1.00 | 1.00 | 1.00 | 1.00 (0.99-1.00) | 1.00 (0.99-1.00) | 1.00 (0.99-1.00) |
| Right posterior cingulate cortex       | 10.49<br>(2.24)  | 10.57<br>(2.24)  | 10.55<br>(2.23)  | 10.53<br>(2.27)  | 21.31 | 21.19 | 21.12 | 21.53 | -0.82<br>(0.42) | -0.69<br>(0.49) | -0.30<br>(0.76) | 0.77<br>(7.12)  | 0.46<br>(6.21)  | 0.25<br>(8.52)  | 4.96<br>(5.10) | 4.06<br>(4.69) | 4.93<br>(6.91) | 0.96 | 0.97 | 0.94 | 0.96 (0.92-0.98) | 0.97 (0.94-0.98) | 0.94 (0.89-0.97) |
| Right precentral gyrus                 | 45.84<br>(6.30)  | 45.79<br>(6.32)  | 45.64<br>(6.23)  | 45.71<br>(6.44)  | 13.74 | 13.80 | 13.66 | 14.09 | 0.60<br>(0.55)  | 1.84<br>(0.07)  | 0.98<br>(0.33)  | -0.12<br>(1.18) | -0.42<br>(1.53) | -0.33<br>(1.87) | 0.93<br>(0.72) | 1.06<br>(1.17) | 1.15<br>(1.51) | 1.00 | 0.99 | 0.99 | 1.00 (0.99-1.00) | 0.99 (0.99-1.00) | 0.99 (0.98-0.99) |
| Right precuneus                        | 36.25<br>(5.09)  | 36.28<br>(5      |                  |                  |       |       |       |       |                 |                 |                 |                 |                 |                 |                |                |                |      |      |      |                  |                  |                  |

|                                        |                 |                 |                 |                 |       |       |       |       |                 |                 |                 |                 |                 |                 |                |                |                |      |      |      |                  |                  |                  |
|----------------------------------------|-----------------|-----------------|-----------------|-----------------|-------|-------|-------|-------|-----------------|-----------------|-----------------|-----------------|-----------------|-----------------|----------------|----------------|----------------|------|------|------|------------------|------------------|------------------|
| Right superior parietal cortex         | 48.46<br>(6.78) | 48.22<br>(6.95) | 48.44<br>(6.70) | 48.63<br>(6.61) | 13.99 | 14.42 | 13.82 | 13.60 | 1.86<br>(0.07)  | 0.16<br>(0.88)  | -1.93<br>(0.06) | -0.55<br>(2.07) | 0.00<br>(1.47)  | 0.41<br>(1.29)  | 1.05<br>(1.87) | 1.11<br>(0.94) | 1.04<br>(0.85) | 0.99 | 0.99 | 1.00 | 0.99 (0.99-1.00) | 0.99 (0.99-1.00) | 1.00 (0.99-1.00) |
| Right superior temporal gyrus          | 34.21<br>(3.72) | 34.20<br>(3.78) | 34.31<br>(3.78) | 34.15<br>(3.66) | 10.88 | 11.05 | 11.01 | 10.71 | 0.11<br>(0.91)  | -0.99<br>(0.33) | 0.74<br>(0.46)  | -0.05<br>(1.85) | 0.28<br>(1.80)  | -0.15<br>(1.48) | 1.35<br>(1.24) | 1.29<br>(1.27) | 1.13<br>(0.95) | 0.99 | 0.98 | 0.99 | 0.99 (0.97-0.99) | 0.98 (0.97-0.99) | 0.99 (0.98-1.00) |
| Right supramarginal gyrus              | 33.68<br>(4.96) | 33.66<br>(4.96) | 33.67<br>(4.97) | 33.69<br>(4.90) | 14.73 | 14.73 | 14.75 | 14.53 | 0.23<br>(0.82)  | 0.21<br>(0.83)  | -0.16<br>(0.87) | -0.06<br>(1.45) | -0.04<br>(1.21) | 0.05<br>(1.18)  | 1.15<br>(0.86) | 0.93<br>(0.77) | 0.95<br>(0.68) | 0.99 | 1.00 | 1.00 | 0.99 (0.99-1.00) | 1.00 (0.99-1.00) | 1.00 (0.99-1.00) |
| Right frontal pole                     | 2.93<br>(0.35)  | 2.94<br>(0.33)  | 2.99<br>(0.37)  | 2.91<br>(0.31)  | 11.85 | 11.35 | 12.21 | 10.70 | -0.44<br>(0.66) | -2.47<br>(0.02) | 0.53<br>(0.60)  | 0.50<br>(7.06)  | 2.07<br>(5.81)  | -0.34<br>(6.23) | 5.54<br>(4.33) | 4.82<br>(3.80) | 4.88<br>(3.83) | 0.83 | 0.89 | 0.87 | 0.84 (0.72-0.91) | 0.88 (0.78-0.94) | 0.87 (0.77-0.93) |
| Right temporal pole                    | 4.40<br>(0.69)  | 4.35<br>(0.70)  | 4.37<br>(0.69)  | 4.39<br>(0.69)  | 15.71 | 16.16 | 15.86 | 15.71 | 1.33<br>(0.19)  | 0.78<br>(0.44)  | 0.16<br>(0.88)  | -1.32<br>(6.82) | -0.82<br>(4.59) | -0.18<br>(6.44) | 4.86<br>(4.91) | 5.32<br>(4.22) | 4.98<br>(4.02) | 0.92 | 0.91 | 0.93 | 0.92 (0.86-0.96) | 0.91 (0.84-0.95) | 0.93 (0.87-0.96) |
| Right transverse temporal gyrus        | 3.12<br>(0.45)  | 3.08<br>(0.42)  | 3.09<br>(0.45)  | 3.11<br>(0.45)  | 14.50 | 13.48 | 14.60 | 14.56 | 1.44<br>(0.16)  | 1.31<br>(0.20)  | 0.42<br>(0.67)  | -0.91<br>(4.91) | -0.99<br>(4.59) | -0.30<br>(4.40) | 3.84<br>(3.15) | 3.77<br>(2.75) | 3.65<br>(2.41) | 0.94 | 0.95 | 0.95 | 0.94 (0.89-0.97) | 0.94 (0.90-0.97) | 0.95 (0.92-0.98) |
| Right insula                           | 23.77<br>(2.58) | 23.36<br>(3.22) | 23.56<br>(2.91) | 23.48<br>(3.23) | 10.87 | 13.80 | 12.35 | 13.75 | 1.61<br>(0.12)  | 0.80<br>(0.43)  | 1.03<br>(0.31)  | -2.08<br>(6.96) | -1.01<br>(6.76) | -1.55<br>(7.79) | 5.51<br>(4.68) | 5.39<br>(4.13) | 6.14<br>(4.96) | 0.86 | 0.83 | 0.83 | 0.83 (0.71-0.91) | 0.82 (0.69-0.90) | 0.81 (0.68-0.89) |
| <b>Local cortical thickness (mm)</b>   |                 |                 |                 |                 |       |       |       |       |                 |                 |                 |                 |                 |                 |                |                |                |      |      |      |                  |                  |                  |
| Left banks superior temporal sulcus    | 2.41<br>(0.17)  | 2.40<br>(0.18)  | 2.41<br>(0.17)  | 2.41<br>(0.18)  | 7.23  | 7.45  | 7.22  | 7.31  | 1.38<br>(0.17)  | -0.18<br>(0.86) | 0.97<br>(0.34)  | -0.51<br>(2.27) | 0.04<br>(1.32)  | -0.24<br>(1.51) | 1.65<br>(1.62) | 0.98<br>(0.87) | 1.15<br>(0.98) | 0.95 | 0.98 | 0.98 | 0.95 (0.91-0.97) | 0.98 (0.97-0.99) | 0.98 (0.96-0.99) |
| Left caudal anterior cingulate cortex  | 2.64<br>(0.24)  | 2.63<br>(0.24)  | 2.65<br>(0.24)  | 2.62<br>(0.22)  | 9.22  | 9.24  | 8.97  | 8.45  | 0.20<br>(0.84)  | -0.66<br>(0.52) | 0.90<br>(0.37)  | -0.13<br>(3.81) | 0.42<br>(3.91)  | -0.51<br>(4.07) | 3.00<br>(2.30) | 3.03<br>(2.46) | 3.06<br>(2.69) | 0.91 | 0.90 | 0.90 | 0.91 (0.84-0.95) | 0.90 (0.83-0.95) | 0.89 (0.81-0.94) |
| Left caudal middle frontal gyrus       | 2.41<br>(0.14)  | 2.41<br>(0.13)  | 2.41<br>(0.13)  | 2.40<br>(0.13)  | 5.77  | 5.43  | 5.58  | 5.56  | 0.18<br>(0.85)  | 0.37<br>(0.71)  | 0.68<br>(0.50)  | -0.04<br>(1.89) | -0.09<br>(1.88) | -0.17<br>(1.76) | 1.52<br>(1.10) | 1.50<br>(1.10) | 1.30<br>(1.17) | 0.94 | 0.95 | 0.95 | 0.94 (0.90-0.97) | 0.95 (0.90-0.97) | 0.95 (0.91-0.97) |
| Left cuneus                            | 1.81<br>(0.10)  | 1.83<br>(0.14)  | 1.82<br>(0.10)  | 1.82<br>(0.11)  | 5.73  | 7.55  | 5.73  | 6.17  | -0.97<br>(0.34) | -0.50<br>(0.62) | -0.91<br>(0.37) | 0.76<br>(5.16)  | 0.18<br>(2.25)  | 0.38<br>(2.86)  | 2.05<br>(4.79) | 1.35<br>(1.80) | 1.44<br>(2.49) | 0.65 | 0.92 | 0.88 | 0.62 (0.40-0.77) | 0.92 (0.86-0.96) | 0.88 (0.79-0.93) |
| Left entorhinal cortex                 | 3.17<br>(0.49)  | 3.15<br>(0.46)  | 3.16<br>(0.45)  | 3.18<br>(0.46)  | 15.48 | 14.58 | 14.25 | 14.35 | 0.62<br>(0.54)  | 0.46<br>(0.65)  | -0.73<br>(0.47) | -0.27<br>(5.05) | -0.09<br>(4.63) | 0.63<br>(3.96)  | 3.42<br>(3.70) | 3.54<br>(2.93) | 3.02<br>(2.59) | 0.95 | 0.96 | 0.97 | 0.95 (0.91-0.97) | 0.96 (0.92-0.98) | 0.97 (0.94-0.98) |
| Left fusiform gyrus                    | 2.61<br>(0.20)  | 2.60<br>(0.20)  | 2.60<br>(0.19)  | 2.60<br>(0.19)  | 7.49  | 7.65  | 7.29  | 7.29  | 1.88<br>(0.07)  | 1.32<br>(0.19)  | 1.67<br>(0.10)  | -0.44<br>(1.79) | -0.30<br>(1.62) | -0.32<br>(1.35) | 1.26<br>(0.91) | 1.15<br>(1.17) | 1.14<br>(0.77) | 0.98 | 0.98 | 0.98 | 0.98 (0.96-0.99) | 0.98 (0.96-0.99) | 0.98 (0.97-0.99) |
| Left inferior parietal cortex          | 2.26<br>(0.17)  | 2.26<br>(0.17)  | 2.26<br>(0.18)  | 2.26<br>(0.18)  | 7.70  | 7.73  | 7.75  | 7.80  | 0.26<br>(0.79)  | -0.17<br>(0.86) | -0.29<br>(0.77) | -0.05<br>(1.29) | 0.03<br>(1.16)  | 0.06<br>(1.45)  | 0.89<br>(0.92) | 0.99<br>(0.59) | 1.10<br>(0.92) | 0.99 | 0.99 | 0.98 | 0.99 (0.97-0.99) | 0.99 (0.98-0.99) | 0.98 (0.97-0.99) |
| Left inferior temporal gyrus           | 2.68<br>(0.16)  | 2.67<br>(0.17)  | 2.68<br>(0.16)  | 2.67<br>(0.16)  | 6.05  | 6.51  | 6.08  | 6.03  | 1.41<br>(0.17)  | 0.10<br>(0.92)  | 1.94<br>(0.06)  | -0.40<br>(1.79) | -0.03<br>(1.71) | -0.46<br>(1.59) | 1.18<br>(1.39) | 1.33<br>(1.05) | 1.24<br>(1.09) | 0.96 | 0.96 | 0.97 | 0.96 (0.93-0.98) | 0.96 (0.93-0.98) | 0.96 (0.93-0.98) |
| Left isthmus cingulate cortex          | 2.24<br>(0.21)  | 2.23<br>(0.24)  | 2.23<br>(0.23)  | 2.24<br>(0.23)  | 9.21  | 10.86 | 10.23 | 10.12 | 1.27<br>(0.21)  | 1.49<br>(0.14)  | -0.19<br>(0.85) | -0.81<br>(3.34) | -0.80<br>(3.10) | 0.01<br>(3.46)  | 2.66<br>(2.15) | 2.58<br>(1.85) | 2.66<br>(2.17) | 0.96 | 0.96 | 0.94 | 0.95 (0.90-0.97) | 0.95 (0.91-0.97) | 0.94 (0.88-0.96) |
| Left lateral occipital cortex          | 2.09<br>(0.13)  | 2.09<br>(0.13)  | 2.08<br>(0.12)  | 2.09<br>(0.12)  | 6.34  | 6.08  | 5.86  | 5.92  | -0.71<br>(0.48) | 0.17<br>(0.87)  | -0.29<br>(0.77) | 0.31<br>(2.66)  | -0.03<br>(1.93) | 0.10<br>(1.80)  | 1.56<br>(2.16) | 1.49<br>(1.20) | 1.25<br>(1.29) | 0.90 | 0.95 | 0.96 | 0.90 (0.83-0.95) | 0.95 (0.91-0.97) | 0.96 (0.92-0.98) |
| Left lateral orbitofrontal cortex      | 2.58<br>(0.16)  | 2.57<br>(0.16)  | 2.58<br>(0.16)  | 2.58<br>(0.15)  | 6.05  | 6.07  | 6.06  | 5.76  | 1.77<br>(0.08)  | 0.15<br>(0.88)  | 0.47<br>(0.64)  | -0.48<br>(1.78) | -0.03<br>(1.45) | -0.12<br>(1.96) | 1.38<br>(1.20) | 1.04<br>(1.00) | 1.46<br>(1.29) | 0.96 | 0.97 | 0.94 | 0.95 (0.92-0.98) | 0.97 (0.95-0.98) | 0.94 (0.90-0.97) |
| Left lingual gyrus                     | 1.94<br>(0.09)  | 1.95<br>(0.09)  | 1.94<br>(0.09)  | 1.94<br>(0.10)  | 4.76  | 4.43  | 4.41  | 5.01  | -0.80<br>(0.43) | -0.09<br>(0.93) | -0.54<br>(0.59) | 0.22<br>(1.65)  | 0.04<br>(1.63)  | 0.13<br>(1.70)  | 1.24<br>(1.10) | 1.30<br>(0.96) | 1.19<br>(1.21) | 0.94 | 0.94 | 0.94 | 0.94 (0.88-0.96) | 0.94 (0.89-0.97) | 0.94 (0.90-0.97) |
| Left medial orbitofrontal cortex       | 2.26<br>(0.16)  | 2.26<br>(0.17)  | 2.27<br>(0.17)  | 2.27<br>(0.17)  | 7.24  | 7.52  | 7.72  | 7.39  | -0.34<br>(0.73) | -0.79<br>(0.43) | -1.71<br>(0.09) | 0.10<br>(2.25)  | 0.27<br>(2.48)  | 0.55<br>(2.12)  | 1.74<br>(1.41) | 1.98<br>(1.49) | 1.74<br>(1.31) | 0.95 | 0.94 | 0.96 | 0.95 (0.91-0.97) | 0.94 (0.90-0.97) | 0.95 (0.92-0.98) |
| Left middle temporal gyrus             | 2.67<br>(0.17)  | 2.66<br>(0.17)  | 2.67<br>(0.17)  | 2.66<br>(0.17)  | 6.29  | 6.53  | 6.27  | 6.24  | 1.41<br>(0.17)  | 1.15<br>(0.26)  | 2.03<br>(0.05)  | -0.42<br>(1.89) | -0.25<br>(1.42) | -0.47<br>(1.52) | 1.24<br>(1.48) | 1.17<br>(0.82) | 1.24<br>(0.99) | 0.96 | 0.97 | 0.97 | 0.96 (0.92-0.98) | 0.97 (0.95-0.99) | 0.97 (0.94-0.98) |
| Left parahippocampal gyrus             | 2.68<br>(0.33)  | 2.65<br>(0.32)  | 2.67<br>(0.31)  | 2.66<br>(0.33)  | 12.29 | 11.90 | 11.77 | 12.34 | 3.45<br>(0.00)  | 1.34<br>(0.19)  | 2.30<br>(0.03)  | -1.14<br>(2.19) | -0.35<br>(1.96) | -0.78<br>(2.24) | 1.91<br>(1.55) | 1.66<br>(1.08) | 2.00<br>(1.25) | 0.98 | 0.99 | 0.98 | 0.98 (0.95-0.99) | 0.99 (0.97-0.99) | 0.98 (0.97-0.99) |
| Left paracentral lobule                | 2.31<br>(0.13)  | 2.30<br>(0.12)  | 2.30<br>(0.14)  | 2.31<br>(0.12)  | 5.63  | 5.37  | 5.97  | 5.41  | 1.20<br>(0.24)  | 1.51<br>(0.14)  | 0.30<br>(0.76)  | -0.40<br>(2.19) | -0.48<br>(2.05) | -0.08<br>(1.92) | 1.72<br>(1.39) | 1.48<br>(1.48) | 1.53<br>(1.14) | 0.92 | 0.94 | 0.94 | 0.92 (0.85-0.95) | 0.94 (0.89-0.97) | 0.94 (0.89-0.97) |
| Left pars opercularis                  | 2.49<br>(0.11)  | 2.48<br>(0.10)  | 2.49<br>(0.10)  | 2.48<br>(0.11)  | 4.36  | 4.13  | 4.09  | 4.28  | 1.27<br>(0.21)  | 0.56<br>(0.58)  | 1.82<br>(0.08)  | -0.39<br>(2.01) | -0.11<br>(1.43) | -0.42<br>(1.50) | 1.16<br>(1.68) | 1.12<br>(0.88) | 1.16<br>(1.03) | 0.88 | 0.94 | 0.94 | 0.88 (0.79-0.93) | 0.94 (0.90-0.97) | 0.94 (0.88-0.97) |
| Left pars orbitalis                    | 2.64<br>(0.20)  | 2.63<br>(0.21)  | 2.64<br>(0.21)  | 2.64<br>(0.21)  | 7.49  | 8.12  | 7.81  | 8.05  | 0.87<br>(0.39)  | 0.04<br>(0.97)  | 0.62<br>(0.54)  | -0.43<br>(2.87) | -0.04<br>(2.06) | -0.29<br>(2.57) | 2.24<br>(1.81) | 1.63<br>(1.22) | 2.00<br>(1.61) | 0.94 | 0.96 | 0.95 | 0.93 (0.88-0.96) | 0.96 (0.93-0.98) | 0.94 (0.90-0.97) |
| Left pars triangularis                 | 2.35<br>(0.14)  | 2.34<br>(0.14)  | 2.34<br>(0.13)  | 2.35<br>(0.14)  | 5.95  | 6.12  | 5.53  | 6.11  | 1.37<br>(0.18)  | 0.91<br>(0.37)  | 0.58<br>(0.56)  | -0.48<br>(2.25) | -0.23<br>(1.82) | -0.15<br>(1.58) | 1.71<br>(1.52) | 1.36<br>(1.21) | 1.25<br>(0.96) | 0.93 | 0.95 | 0.97 | 0.93 (0.87-0.96) | 0.95 (0.91-0.97) | 0.97 (0.94-0.98) |
| Left pericalcarine cortex              | 1.58<br>(0.10)  | 1.60<br>(0.14)  | 1.58<br>(0.09)  | 1.59<br>(0.10)  | 6.38  | 8.55  | 5.94  | 6.37  | -1.00<br>(0.32) | 0.02<br>(0.99)  | -1.93<br>(0.06) | 1.20<br>(7.71)  | 0.02<br>(2.86)  | 0.84<br>(2.91)  | 3.09<br>(7.15) | 2.00<br>(2.01) | 2.10<br>(2.16) | 0.34 | 0.90 | 0.90 | 0.33 (0.04-0.57) | 0.90 (0.82-0.94) | 0.89 (0.81-0.94) |
| Left postcentral gyrus                 | 1.98<br>(0.12)  | 1.98<br>(0.12)  | 1.98<br>(0.12)  | 1.98<br>(0.12)  | 5.93  | 6.00  | 6.02  | 5.91  | -0.58<br>(0.57) | 0.59<br>(0.56)  | -0.48<br>(0.63) | 0.13<br>(1.50)  | -0.11<br>(1.18) | 0.07<br>(0.95)  | 1.08<br>(1.03) | 0.91<br>(0.74) | 0.78<br>(0.52) | 0.97 | 0.98 | 0.99 | 0.97 (0.95-0.98) | 0.98 (0.96-0.99) | 0.99 (0.98-0.99) |
| Left posterior cingulate cortex        | 2.37<br>(0.18)  | 2.35<br>(0.19)  | 2.36<br>(0.18)  | 2.34<br>(0.18)  | 7.40  | 8.05  | 7.66  | 7.87  | 1.75<br>(0.09)  | 1.30<br>(0.20)  | 2.83<br>(0.01)  | -0.89<br>(3.25) | -0.63<br>(3.06) | -1.30<br>(2.93) | 2.79<br>(1.84) | 2.40<br>(1.97) | 2.53<br>(1.94) | 0.92 | 0.92 | 0.93 | 0.91 (0.85-0.95) | 0.92 (0.85-0.95) | 0.92 (0.83-0.96) |
| Left precentral gyrus                  | 2.47<br>(0.14)  | 2.47<br>(0.14)  | 2.47<br>(0.14)  | 2.47<br>(0.14)  | 5.63  | 5.76  | 5.66  | 5.54  | 0.33<br>(0.74)  | -0.13<br>(0.90) | -0.58<br>(0.57) | -0.09<br>(1.69) | 0.02<br>(1.19)  | 0.12<br>(1.34)  | 0.98<br>(1.38) | 0.89<br>(0.78) | 1.05<br>(0.83) | 0.96 | 0.98 | 0.97 | 0.96 (0.93-0.98) | 0.98 (0.96-0.99) | 0.97 (0.95-0.99) |
| Left precuneus                         | 2.23<br>(0.17)  | 2.23<br>(0.18)  | 2.23<br>(0.18)  | 2.23<br>(0.17)  | 7.76  | 7.93  | 8.11  | 7.72  | 0.05<br>(0.96)  | 1.21<br>(0.23)  | 1.01<br>(0.32)  | -0.02<br>(1.31) | -0.27<br>(1.31) | -0.17<br>(1.15) | 1.03<br>(0.79) | 1.06<br>(0.80) | 0.93<br>(0.69) | 0.99 | 0.99 | 0.99 | 0.99 (0.97-0.99) | 0.99 (0.97-0.99) | 0.99 (0.98-0.99) |
| Left rostral anterior cingulate cortex | 2.60<br>(0.24)  | 2.61<br>(0.24)  | 2.60<br>(0.22)  | 2.60<br>(0.24)  | 9.35  | 9.39  | 8.29  | 9.08  | -0.29<br>(0.77) | 0.45<br>(0.65)  | 0.07<br>(0.94)  | 0.20<br>(4.61)  | -0.17<br>(3.64) | -0.03<br>(4.36) | 2.90<br>(3.56) | 2.52<br>(2.60) | 3.14<br>(2.98) | 0.88 | 0.92 | 0.89 | 0.88 (0.79-0.93) | 0.91 (0.84-0.95) | 0.89 (0.80-0.94) |
| Left rostral middle frontal gyrus      | 2.25<br>(0.12)  | 2.24<br>(0.12)  | 2.25<br>(0.12)  | 2.24<br>(0.12)  | 5.35  | 5.37  | 5.20  | 5.19  | 0.52<br>(0.60)  | -0.88<br>(0.38) | 1.28<br>(0.21)  | -0.16<br>(1.94) | 0.21<br>(1.48)  | -0.35<br>(1.80) | 1.31<br>(1.42) | 1.19<br>(0.89) | 1.37<br>(1.21) | 0.93 | 0.96 | 0.94 | 0.93 (0.88-0.96) | 0.96 (0.93-0.98) | 0.94 (0.89-0.97) |
| Left superior frontal gyrus            | 2.51<br>(0.13)  | 2.50<br>(0.12)  | 2.50<br>(0.13)  | 2.50<br>(0.13)  | 5.01  | 5.00  | 5.05  | 5.07  | 1.29<br>(0.20)  | 0.97<br>(0.34)  | 0.35<br>(0.73)  | -0.33<br>(1.70) | -0.23<br>(1.56) | -0.07<br>(1.17) | 1.13<br>(1.30) | 1.30<br>(0.86) | 0.99<br>(0.62) | 0.94 | 0.95 | 0.97 | 0.94 (0.90-0.97) | 0.95 (0.92-0.97) | 0.97 (0.95-0.99) |
| Left superior parietal cortex          | 2.08<br>(0.16)  | 2.08<br>(0.16)  | 2.08<br>(0.16)  | 2.08<br>(0.16)  | 7.86  | 7.76  | 7.64  | 7.65  | 1.00<br>(0.32)  | 0.05<br>(0.96)  | -0.40<br>(0.69) | -0.19<br>(1.28) | 0.01<br>(1.03)  | 0.09<br>(1.33)  | 0.97<br>(0.84) | 0.77<br>(0.67) | 1.01<br>(0.86) | 0.99 | 0.99 | 0.99 | 0.99 (0.98-0.99) | 0.99 (0.98-1.00) | 0.99 (0.97-0.99) |
| Left superior temporal gyrus           | 2.55<br>(0.17)  | 2.55<br>(0.17)  | 2.54<br>(0.17)  | 2.55<br>(0.17)  | 6.68  | 6.62  | 6.59  | 6.60  | -0.42<br>(0.68) | 0.66<br>(0.52)  | -0.26<br>(0.79) | 0.07<br>(1.07)  | -0.09<br>(0.96) | 0.04<br>(0.97)  | 0.73<br>(0.78) | 0.78<br>(0.56) |                |      |      |      |                  |                  |                  |

|                                         |                |                |                |                |       |       |       |       |                 |                 |                 |                 |                 |                 |                |                |                |      |      |      |                  |                  |                  |
|-----------------------------------------|----------------|----------------|----------------|----------------|-------|-------|-------|-------|-----------------|-----------------|-----------------|-----------------|-----------------|-----------------|----------------|----------------|----------------|------|------|------|------------------|------------------|------------------|
| Left transverse temporal gyrus          | 2.25<br>(0.21) | 2.23<br>(0.22) | 2.25<br>(0.21) | 2.25<br>(0.22) | 9.48  | 9.76  | 9.48  | 9.59  | 2.35<br>(0.02)  | 0.43<br>(0.67)  | 0.95<br>(0.35)  | -0.83<br>(2.35) | -0.15<br>(2.32) | -0.25<br>(1.60) | 1.95<br>(1.54) | 1.65<br>(1.62) | 1.24<br>(1.03) | 0.97 | 0.97 | 0.99 | 0.97 (0.94-0.98) | 0.97 (0.95-0.98) | 0.99 (0.97-0.99) |
| Left insula                             | 2.78<br>(0.20) | 2.76<br>(0.20) | 2.79<br>(0.21) | 2.78<br>(0.21) | 7.08  | 7.07  | 7.55  | 7.72  | 1.15<br>(0.26)  | -0.29<br>(0.77) | 0.15<br>(0.88)  | -0.58<br>(3.19) | 0.15<br>(4.14)  | -0.13<br>(3.80) | 2.43<br>(2.12) | 3.02<br>(2.80) | 2.93<br>(2.37) | 0.89 | 0.84 | 0.87 | 0.89 (0.81-0.94) | 0.84 (0.72-0.91) | 0.87 (0.77-0.93) |
| Right banks superior temporal sulcus    | 2.43<br>(0.16) | 2.42<br>(0.18) | 2.43<br>(0.17) | 2.42<br>(0.17) | 6.79  | 7.26  | 7.05  | 7.13  | 1.73<br>(0.09)  | 0.23<br>(0.82)  | 0.86<br>(0.40)  | -0.44<br>(1.57) | -0.07<br>(1.60) | -0.22<br>(1.53) | 1.21<br>(1.08) | 1.19<br>(1.06) | 1.25<br>(0.89) | 0.98 | 0.97 | 0.98 | 0.97 (0.95-0.99) | 0.97 (0.95-0.99) | 0.98 (0.96-0.99) |
| Right caudal anterior cingulate cortex  | 2.47<br>(0.21) | 2.45<br>(0.21) | 2.44<br>(0.20) | 2.44<br>(0.21) | 8.49  | 8.72  | 8.12  | 8.42  | 1.79<br>(0.08)  | 2.71<br>(0.01)  | 2.99<br>(0.00)  | -0.85<br>(3.20) | -1.16<br>(2.81) | -1.01<br>(2.30) | 2.36<br>(2.29) | 2.39<br>(1.84) | 1.96<br>(1.55) | 0.94 | 0.94 | 0.97 | 0.93 (0.88-0.96) | 0.93 (0.86-0.96) | 0.96 (0.91-0.98) |
| Right caudal middle frontal gyrus       | 2.40<br>(0.15) | 2.40<br>(0.15) | 2.40<br>(0.15) | 2.41<br>(0.15) | 6.06  | 6.12  | 6.10  | 6.06  | 0.99<br>(0.33)  | 1.16<br>(0.25)  | -0.36<br>(0.72) | -0.28<br>(1.87) | -0.31<br>(1.71) | 0.10<br>(1.88)  | 1.39<br>(1.26) | 1.31<br>(1.12) | 1.47<br>(1.15) | 0.95 | 0.96 | 0.95 | 0.95 (0.92-0.97) | 0.96 (0.93-0.98) | 0.95 (0.92-0.97) |
| Right cuneus                            | 1.83<br>(0.14) | 1.84<br>(0.15) | 1.84<br>(0.14) | 1.84<br>(0.13) | 7.55  | 8.14  | 7.36  | 7.29  | -0.96<br>(0.34) | -0.86<br>(0.39) | -1.35<br>(0.18) | 0.53<br>(3.44)  | 0.25<br>(1.74)  | 0.35<br>(1.69)  | 1.62<br>(3.07) | 1.33<br>(1.14) | 1.20<br>(1.23) | 0.88 | 0.97 | 0.98 | 0.88 (0.79-0.93) | 0.97 (0.95-0.98) | 0.98 (0.96-0.99) |
| Right entorhinal cortex                 | 3.30<br>(0.46) | 3.27<br>(0.47) | 3.25<br>(0.46) | 3.30<br>(0.44) | 14.00 | 14.36 | 14.24 | 13.46 | 1.56<br>(0.13)  | 1.60<br>(0.12)  | 0.09<br>(0.93)  | -0.97<br>(4.00) | -1.41<br>(5.74) | -0.01<br>(5.60) | 3.01<br>(2.78) | 3.94<br>(4.37) | 4.08<br>(3.78) | 0.96 | 0.92 | 0.92 | 0.96 (0.93-0.98) | 0.92 (0.85-0.95) | 0.92 (0.86-0.96) |
| Right fusiform gyrus                    | 2.60<br>(0.19) | 2.60<br>(0.19) | 2.61<br>(0.19) | 2.61<br>(0.19) | 7.18  | 7.28  | 7.18  | 7.12  | 1.42<br>(0.16)  | -0.31<br>(0.76) | -1.02<br>(0.31) | -0.27<br>(1.20) | 0.07<br>(1.43)  | 0.23<br>(1.46)  | 0.99<br>(0.70) | 1.19<br>(0.77) | 1.17<br>(0.90) | 0.99 | 0.98 | 0.98 | 0.99 (0.97-0.99) | 0.98 (0.96-0.99) | 0.98 (0.96-0.99) |
| Right inferior parietal cortex          | 2.26<br>(0.15) | 2.26<br>(0.15) | 2.25<br>(0.15) | 2.26<br>(0.16) | 6.63  | 6.67  | 6.57  | 7.05  | 1.13<br>(0.27)  | 1.51<br>(0.14)  | 0.62<br>(0.54)  | -0.27<br>(1.55) | -0.34<br>(1.45) | -0.17<br>(1.57) | 1.14<br>(1.06) | 1.04<br>(1.06) | 1.15<br>(1.07) | 0.97 | 0.97 | 0.98 | 0.97 (0.95-0.99) | 0.97 (0.95-0.99) | 0.97 (0.95-0.99) |
| Right inferior temporal gyrus           | 2.69<br>(0.14) | 2.69<br>(0.14) | 2.69<br>(0.15) | 2.70<br>(0.14) | 5.32  | 5.04  | 5.41  | 5.04  | 0.73<br>(0.47)  | 0.15<br>(0.88)  | -0.85<br>(0.40) | -0.21<br>(2.07) | -0.04<br>(1.41) | 0.24<br>(1.79)  | 1.30<br>(1.61) | 1.08<br>(0.89) | 1.27<br>(1.27) | 0.92 | 0.97 | 0.94 | 0.92 (0.86-0.96) | 0.97 (0.94-0.98) | 0.94 (0.89-0.97) |
| Right isthmus cingulate cortex          | 2.23<br>(0.26) | 2.22<br>(0.27) | 2.20<br>(0.28) | 2.21<br>(0.30) | 11.88 | 11.97 | 12.77 | 13.42 | 0.84<br>(0.41)  | 1.77<br>(0.08)  | 1.14<br>(0.26)  | -0.41<br>(3.31) | -1.07<br>(4.04) | -0.97<br>(5.07) | 2.37<br>(2.32) | 2.51<br>(3.33) | 2.91<br>(4.24) | 0.96 | 0.96 | 0.96 | 0.96 (0.94-0.98) | 0.96 (0.93-0.98) | 0.95 (0.91-0.97) |
| Right lateral occipital cortex          | 2.12<br>(0.13) | 2.12<br>(0.13) | 2.11<br>(0.13) | 2.12<br>(0.13) | 6.16  | 6.13  | 6.26  | 6.34  | -1.20<br>(0.23) | 0.76<br>(0.45)  | -1.58<br>(0.12) | 0.20<br>(1.13)  | -0.22<br>(1.83) | 0.25<br>(1.09)  | 0.80<br>(0.81) | 1.23<br>(1.37) | 0.93<br>(0.60) | 0.98 | 0.96 | 0.99 | 0.98 (0.97-0.99) | 0.96 (0.92-0.98) | 0.98 (0.97-0.99) |
| Right lateral orbitofrontal cortex      | 2.55<br>(0.14) | 2.52<br>(0.13) | 2.52<br>(0.13) | 2.53<br>(0.14) | 5.40  | 5.36  | 5.33  | 5.70  | 3.36<br>(0.00)  | 2.85<br>(0.01)  | 1.23<br>(0.23)  | -1.07<br>(2.11) | -1.09<br>(2.47) | -0.59<br>(3.00) | 1.93<br>(1.35) | 2.05<br>(1.73) | 2.11<br>(2.19) | 0.92 | 0.89 | 0.85 | 0.91 (0.80-0.95) | 0.88 (0.76-0.93) | 0.85 (0.73-0.91) |
| Right lingual gyrus                     | 2.00<br>(0.12) | 2.00<br>(0.12) | 2.00<br>(0.12) | 2.00<br>(0.12) | 6.15  | 5.93  | 5.99  | 6.12  | 0.57<br>(0.57)  | 0.20<br>(0.84)  | 0.59<br>(0.56)  | -0.17<br>(2.26) | -0.04<br>(1.56) | -0.14<br>(1.72) | 1.50<br>(1.68) | 1.19<br>(1.00) | 1.14<br>(1.29) | 0.93 | 0.97 | 0.96 | 0.93 (0.88-0.96) | 0.97 (0.94-0.98) | 0.97 (0.94-0.98) |
| Right medial orbitofrontal cortex       | 2.34<br>(0.14) | 2.33<br>(0.15) | 2.33<br>(0.15) | 2.34<br>(0.16) | 5.97  | 6.54  | 6.48  | 6.70  | 1.93<br>(0.06)  | 1.55<br>(0.13)  | 0.05<br>(0.96)  | -0.71<br>(2.26) | -0.55<br>(2.19) | -0.07<br>(2.86) | 1.93<br>(1.35) | 1.73<br>(1.42) | 2.07<br>(1.95) | 0.94 | 0.94 | 0.91 | 0.93 (0.87-0.96) | 0.94 (0.88-0.96) | 0.90 (0.82-0.95) |
| Right middle temporal gyrus             | 2.73<br>(0.15) | 2.72<br>(0.17) | 2.73<br>(0.16) | 2.73<br>(0.16) | 5.64  | 6.19  | 5.97  | 5.95  | 0.96<br>(0.34)  | 0.67<br>(0.51)  | 0.44<br>(0.66)  | -0.23<br>(1.39) | -0.14<br>(1.19) | -0.11<br>(1.37) | 0.95<br>(1.03) | 0.88<br>(0.80) | 1.11<br>(0.80) | 0.98 | 0.98 | 0.97 | 0.97 (0.95-0.99) | 0.98 (0.96-0.99) | 0.97 (0.95-0.99) |
| Right parahippocampal gyrus             | 2.63<br>(0.29) | 2.62<br>(0.29) | 2.61<br>(0.29) | 2.62<br>(0.28) | 11.19 | 10.93 | 11.14 | 10.71 | 1.48<br>(0.15)  | 2.03<br>(0.05)  | 1.27<br>(0.21)  | -0.47<br>(2.25) | -0.80<br>(2.62) | -0.39<br>(2.31) | 1.83<br>(1.37) | 2.17<br>(1.64) | 1.85<br>(1.42) | 0.98 | 0.97 | 0.98 | 0.98 (0.96-0.99) | 0.97 (0.95-0.98) | 0.98 (0.96-0.99) |
| Right paracentral lobule                | 2.31<br>(0.13) | 2.31<br>(0.14) | 2.31<br>(0.14) | 2.30<br>(0.14) | 5.59  | 5.98  | 5.96  | 6.12  | 0.31<br>(0.76)  | 0.77<br>(0.44)  | 1.05<br>(0.30)  | -0.10<br>(1.72) | -0.22<br>(1.64) | -0.30<br>(1.70) | 1.39<br>(1.00) | 1.30<br>(1.00) | 1.28<br>(1.14) | 0.96 | 0.96 | 0.96 | 0.96 (0.92-0.98) | 0.96 (0.93-0.98) | 0.96 (0.93-0.98) |
| Right pars opercularis                  | 2.50<br>(0.13) | 2.49<br>(0.14) | 2.50<br>(0.14) | 2.50<br>(0.13) | 5.29  | 5.63  | 5.51  | 5.28  | 0.82<br>(0.42)  | -0.49<br>(0.63) | -0.83<br>(0.41) | -0.24<br>(1.76) | 0.09<br>(1.37)  | 0.20<br>(1.59)  | 1.24<br>(1.26) | 1.04<br>(0.88) | 1.20<br>(1.05) | 0.95 | 0.97 | 0.96 | 0.95 (0.91-0.97) | 0.97 (0.94-0.98) | 0.96 (0.92-0.98) |
| Right pars orbitalis                    | 2.60<br>(0.17) | 2.60<br>(0.17) | 2.60<br>(0.16) | 2.62<br>(0.17) | 6.50  | 6.63  | 6.22  | 6.45  | 0.01<br>(0.99)  | 0.46<br>(0.65)  | -1.68<br>(0.10) | -0.01<br>(2.32) | -0.15<br>(2.31) | 0.58<br>(2.29)  | 1.74<br>(1.52) | 1.86<br>(1.35) | 1.70<br>(1.62) | 0.94 | 0.93 | 0.94 | 0.94 (0.89-0.97) | 0.93 (0.88-0.96) | 0.94 (0.89-0.97) |
| Right pars triangularis                 | 2.39<br>(0.15) | 2.37<br>(0.15) | 2.38<br>(0.14) | 2.39<br>(0.15) | 6.14  | 6.27  | 6.06  | 6.39  | 1.52<br>(0.14)  | 0.42<br>(0.68)  | -0.14<br>(0.89) | -0.56<br>(2.36) | -0.10<br>(1.67) | 0.02<br>(1.74)  | 1.56<br>(1.84) | 1.29<br>(1.05) | 1.35<br>(1.08) | 0.93 | 0.96 | 0.96 | 0.93 (0.87-0.96) | 0.96 (0.93-0.98) | 0.96 (0.93-0.98) |
| Right pericalcarine cortex              | 1.63<br>(0.13) | 1.62<br>(0.12) | 1.62<br>(0.13) | 1.62<br>(0.12) | 7.92  | 7.56  | 7.99  | 7.28  | 1.29<br>(0.21)  | 1.53<br>(0.13)  | 0.57<br>(0.57)  | -0.41<br>(2.26) | -0.56<br>(2.50) | -0.18<br>(2.77) | 1.63<br>(1.61) | 1.79<br>(1.82) | 1.77<br>(2.11) | 0.96 | 0.95 | 0.94 | 0.96 (0.92-0.98) | 0.95 (0.91-0.97) | 0.94 (0.89-0.97) |
| Right postcentral gyrus                 | 1.99<br>(0.10) | 1.98<br>(0.11) | 1.98<br>(0.11) | 1.98<br>(0.11) | 5.23  | 5.52  | 5.46  | 5.46  | 0.52<br>(0.61)  | 0.94<br>(0.35)  | 0.87<br>(0.39)  | -0.14<br>(1.59) | -0.20<br>(1.31) | -0.16<br>(1.12) | 0.95<br>(1.28) | 1.05<br>(0.79) | 0.91<br>(0.65) | 0.96 | 0.97 | 0.98 | 0.96 (0.93-0.98) | 0.97 (0.95-0.98) | 0.98 (0.96-0.99) |
| Right posterior cingulate cortex        | 2.29<br>(0.19) | 2.29<br>(0.19) | 2.29<br>(0.18) | 2.30<br>(0.19) | 8.21  | 8.49  | 7.77  | 8.40  | 0.10<br>(0.92)  | 0.32<br>(0.75)  | -0.14<br>(0.89) | -0.09<br>(3.81) | -0.15<br>(3.71) | 0.05<br>(4.53)  | 2.35<br>(2.98) | 2.69<br>(2.53) | 2.93<br>(3.43) | 0.90 | 0.89 | 0.85 | 0.90 (0.82-0.94) | 0.90 (0.82-0.94) | 0.85 (0.74-0.92) |
| Right precentral gyrus                  | 2.47<br>(0.13) | 2.48<br>(0.14) | 2.47<br>(0.13) | 2.48<br>(0.13) | 5.06  | 5.50  | 5.20  | 5.07  | -0.59<br>(0.56) | -0.05<br>(0.96) | -0.77<br>(0.44) | 0.12<br>(1.59)  | 0.01<br>(1.41)  | 0.15<br>(1.30)  | 1.17<br>(1.06) | 1.07<br>(0.91) | 0.89<br>(0.94) | 0.96 | 0.96 | 0.97 | 0.96 (0.92-0.98) | 0.96 (0.93-0.98) | 0.97 (0.94-0.98) |
| Right precuneus                         | 2.24<br>(0.18) | 2.23<br>(0.17) | 2.23<br>(0.18) | 2.23<br>(0.18) | 7.88  | 7.69  | 7.90  | 8.01  | 1.77<br>(0.08)  | 0.58<br>(0.57)  | 1.17<br>(0.25)  | -0.39<br>(1.47) | -0.12<br>(1.29) | -0.25<br>(1.29) | 0.98<br>(1.15) | 0.98<br>(0.82) | 0.91<br>(0.94) | 0.98 | 0.99 | 0.99 | 0.98 (0.96-0.99) | 0.99 (0.97-0.99) | 0.99 (0.97-0.99) |
| Right rostral anterior cingulate cortex | 2.88<br>(0.23) | 2.86<br>(0.24) | 2.85<br>(0.24) | 2.88<br>(0.23) | 7.85  | 8.38  | 8.57  | 7.82  | 1.34<br>(0.19)  | 1.68<br>(0.10)  | 0.08<br>(0.94)  | -0.68<br>(3.24) | -0.87<br>(3.27) | -0.03<br>(2.53) | 2.57<br>(2.04) | 2.39<br>(2.36) | 1.97<br>(1.56) | 0.93 | 0.93 | 0.95 | 0.92 (0.86-0.96) | 0.92 (0.86-0.96) | 0.95 (0.91-0.97) |
| Right rostral middle frontal gyrus      | 2.27<br>(0.13) | 2.26<br>(0.14) | 2.27<br>(0.13) | 2.26<br>(0.14) | 5.83  | 6.05  | 5.84  | 6.09  | 1.38<br>(0.18)  | -0.33<br>(0.75) | 1.48<br>(0.15)  | -0.36<br>(1.62) | 0.07<br>(1.47)  | -0.35<br>(1.48) | 1.12<br>(1.21) | 1.21<br>(0.81) | 1.24<br>(0.86) | 0.96 | 0.97 | 0.97 | 0.96 (0.93-0.98) | 0.97 (0.94-0.98) | 0.97 (0.94-0.98) |
| Right superior frontal gyrus            | 2.54<br>(0.13) | 2.53<br>(0.14) | 2.53<br>(0.14) | 2.53<br>(0.14) | 5.15  | 5.47  | 5.35  | 5.39  | 1.88<br>(0.07)  | 1.18<br>(0.24)  | 1.40<br>(0.17)  | -0.46<br>(1.60) | -0.27<br>(1.46) | -0.23<br>(1.04) | 1.12<br>(1.23) | 1.09<br>(0.99) | 0.83<br>(0.66) | 0.96 | 0.96 | 0.98 | 0.95 (0.92-0.98) | 0.96 (0.93-0.98) | 0.98 (0.96-0.99) |
| Right superior parietal cortex          | 2.07<br>(0.16) | 2.07<br>(0.16) | 2.07<br>(0.16) | 2.07<br>(0.16) | 7.74  | 7.65  | 7.82  | 7.86  | 1.00<br>(0.32)  | 0.51<br>(0.61)  | -0.01<br>(0.99) | -0.22<br>(1.51) | -0.13<br>(1.58) | -0.01<br>(1.02) | 0.97<br>(1.17) | 1.16<br>(1.06) | 0.84<br>(0.56) | 0.98 | 0.98 | 0.99 | 0.98 (0.97-0.99) | 0.98 (0.97-0.99) | 0.99 (0.99-1.00) |
| Right superior temporal gyrus           | 2.61<br>(0.17) | 2.60<br>(0.17) | 2.61<br>(0.17) | 2.61<br>(0.17) | 6.35  | 6.58  | 6.53  | 6.70  | 1.56<br>(0.13)  | 0.60<br>(0.55)  | 0.40<br>(0.69)  | -0.43<br>(1.77) | -0.11<br>(1.03) | -0.09<br>(1.12) | 1.01<br>(1.52) | 0.70<br>(0.75) | 0.82<br>(0.76) | 0.96 | 0.99 | 0.99 | 0.96 (0.93-0.98) | 0.99 (0.98-0.99) | 0.99 (0.98-0.99) |
| Right supramarginal gyrus               | 2.37<br>(0.11) | 2.37<br>(0.12) | 2.37<br>(0.10) | 2.38<br>(0.12) | 4.78  | 5.25  | 4.39  | 5.01  | 1.30<br>(0.20)  | 1.22<br>(0.23)  | -0.50<br>(0.62) | -0.32<br>(1.58) | -0.22<br>(1.29) | 0.09<br>(1.38)  | 0.96<br>(1.29) | 1.03<br>(0.79) | 1.05<br>(0.87) | 0.96 | 0.96 | 0.96 | 0.96 (0.92-0.98) | 0.96 (0.93-0.98) | 0.96 (0.93-0.98) |
| Right frontal pole                      | 2.62<br>(0.22) | 2.60<br>(0.20) | 2.60<br>(0.24) | 2.60<br>(0.22) | 8.35  | 7.76  | 9.35  | 8.40  | 1.43<br>(0.16)  | 0.90<br>(0.38)  | 1.57<br>(0.12)  | -0.79<br>(3.70) | -0.78<br>(5.29) | -0.75<br>(3.00) | 2.69<br>(2.64) | 3.21<br>(4.25) | 2.63<br>(1.59) | 0.89 | 0.84 | 0.93 | 0.89 (0.80-0.94) | 0.84 (0.72-0.91) | 0.93 (0.88-0.96) |
| Right temporal pole                     | 3.56<br>(0.36) | 3.57<br>(0.35) | 3.55<br>(0.37) | 3.60<br>(0.33) | 10.23 | 9.79  | 10.56 | 9.11  | -0.45<br>(0     |                 |                 |                 |                 |                 |                |                |                |      |      |      |                  |                  |                  |

|                                                      |                     |                     |                     |                         |       |       |       |       |                 |                 |                 |                 |                 |                  |                |                |                 |      |      |      |                  |                  |                  |
|------------------------------------------------------|---------------------|---------------------|---------------------|-------------------------|-------|-------|-------|-------|-----------------|-----------------|-----------------|-----------------|-----------------|------------------|----------------|----------------|-----------------|------|------|------|------------------|------------------|------------------|
|                                                      |                     |                     |                     | (22.42)                 |       |       |       |       |                 |                 |                 |                 |                 |                  |                |                |                 |      |      |      |                  |                  |                  |
| Left total cortical white matter (ml)                | 210.68<br>(32.31)   | 210.45<br>(32.92)   | 210.68<br>(32.08)   | 210.88<br>(31.98)       | 15.34 | 15.64 | 15.23 | 15.16 | 0.33<br>(0.75)  | 0.01<br>(0.99)  | -0.69<br>(0.49) | -0.14<br>(2.35) | 0.02<br>(1.16)  | 0.13<br>(0.93)   | 1.20<br>(2.02) | 0.90<br>(0.72) | 0.75<br>(0.55)  | 0.99 | 1.00 | 1.00 | 0.99 (0.98-0.99) | 1.00 (0.99-1.00) | 1.00 (1.00-1.00) |
| Right total cortical white matter (ml)               | 210.65<br>(31.41)   | 210.22<br>(32.07)   | 210.64<br>(30.88)   | 210.82<br>(31.67)       | 14.91 | 15.25 | 14.66 | 15.02 | 0.92<br>(0.36)  | 0.03<br>(0.98)  | -0.48<br>(0.63) | -0.25<br>(1.48) | 0.03<br>(1.00)  | 0.07<br>(1.06)   | 0.89<br>(1.20) | 0.76<br>(0.64) | 0.80<br>(0.68)  | 1.00 | 1.00 | 1.00 | 1.00 (0.99-1.00) | 1.00 (1.00-1.00) | 1.00 (1.00-1.00) |
| Left total cortical surface area (cm <sup>2</sup> )  | 782.37<br>(89.05)   | 782.54<br>(90.29)   | 782.33<br>(88.65)   | 784.8<br>2<br>(88.75)   | 11.38 | 11.54 | 11.33 | 11.31 | -0.14<br>(0.89) | 0.06<br>(0.95)  | -4.14<br>(0.00) | 0.01<br>(1.16)  | 0.00<br>(0.62)  | 0.32<br>(0.55)   | 0.61<br>(0.98) | 0.46<br>(0.42) | 0.46<br>(0.44)  | 1.00 | 1.00 | 1.00 | 1.00 (0.99-1.00) | 1.00 (1.00-1.00) | 1.00 (1.00-1.00) |
| Right total cortical surface area (cm <sup>2</sup> ) | 785.24<br>(88.21)   | 785.21<br>(90.39)   | 785.28<br>(88.08)   | 786.95<br>(89.09)       | 11.23 | 11.51 | 11.22 | 11.32 | 0.02<br>(0.98)  | -0.05<br>(0.96) | -2.14<br>(0.04) | -0.04<br>(1.04) | 0.01<br>(0.63)  | 0.21<br>(0.65)   | 0.60<br>(0.85) | 0.49<br>(0.39) | 0.52<br>(0.43)  | 1.00 | 1.00 | 1.00 | 1.00 (0.99-1.00) | 1.00 (1.00-1.00) | 1.00 (1.00-1.00) |
| Left mean cortical thickness (mm)                    | 2.34<br>(0.10)      | 2.34<br>(0.10)      | 2.34<br>(0.10)      | 2.34<br>(0.10)          | 4.34  | 4.39  | 4.32  | 4.36  | 1.04<br>(0.30)  | 0.55<br>(0.58)  | 0.54<br>(0.59)  | -0.11<br>(0.67) | -0.06<br>(0.70) | -0.05<br>(0.62)  | 0.53<br>(0.42) | 0.50<br>(0.48) | 0.48<br>(0.38)  | 0.99 | 0.99 | 0.99 | 0.99 (0.98-0.99) | 0.99 (0.98-0.99) | 0.99 (0.98-0.99) |
| Right mean cortical thickness (mm)                   | 2.36<br>(0.10)      | 2.35<br>(0.10)      | 2.35<br>(0.10)      | 2.36<br>(0.11)          | 4.35  | 4.43  | 4.41  | 4.46  | 1.89<br>(0.07)  | 1.70<br>(0.10)  | 0.32<br>(0.75)  | -0.25<br>(0.85) | -0.20<br>(0.73) | -0.03<br>(0.59)  | 0.48<br>(0.74) | 0.51<br>(0.55) | 0.45<br>(0.37)  | 0.98 | 0.99 | 0.99 | 0.98 (0.96-0.99) | 0.98 (0.97-0.99) | 0.99 (0.98-1.00) |
| Left cerebellar white matter (ml)                    | 14.88<br>(1.68)     | 14.82<br>(1.42)     | 14.97<br>(1.72)     | 14.41<br>(1.63)         | 11.31 | 9.60  | 11.47 | 11.28 | 0.66<br>(0.51)  | -1.01<br>(0.32) | 4.06<br>(0.00)  | -0.29<br>(4.12) | 0.54<br>(3.54)  | -3.26<br>(5.34)  | 3.10<br>(2.69) | 2.79<br>(2.20) | 4.58<br>(4.22)  | 0.93 | 0.95 | 0.89 | 0.91 (0.85-0.95) | 0.95 (0.91-0.97) | 0.86 (0.65-0.93) |
| Right cerebellar white matter (ml)                   | 14.76<br>(2.32)     | 14.51<br>(1.43)     | 14.49<br>(1.70)     | 14.48<br>(3.05)         | 15.69 | 9.84  | 11.74 | 21.05 | 1.03<br>(0.31)  | 1.09<br>(0.28)  | 0.72<br>(0.48)  | -1.16<br>(8.65) | -1.48<br>(8.87) | -2.57<br>(13.26) | 4.46<br>(7.47) | 4.13<br>(7.97) | 7.47<br>(11.20) | 0.72 | 0.70 | 0.56 | 0.65 (0.44-0.79) | 0.66 (0.46-0.80) | 0.54 (0.29-0.72) |
| Left cerebellar gray matter (ml)                     | 49.15<br>(4.41)     | 49.20<br>(4.46)     | 49.12<br>(4.42)     | 49.65<br>(4.47)         | 8.97  | 9.07  | 8.99  | 9.01  | -0.46<br>(0.65) | 0.37<br>(0.71)  | -5.19<br>(0.00) | 0.10<br>(1.55)  | -0.06<br>(1.01) | 1.02<br>(1.27)   | 1.03<br>(1.15) | 0.73<br>(0.70) | 1.22<br>(1.07)  | 0.98 | 0.99 | 0.99 | 0.99 (0.97-0.99) | 0.99 (0.99-1.00) | 0.98 (0.92-0.99) |
| Right cerebellar gray matter (ml)                    | 49.26<br>(4.60)     | 49.28<br>(4.54)     | 49.16<br>(4.44)     | 49.57<br>(4.90)         | 9.34  | 9.21  | 9.04  | 9.89  | -0.08<br>(0.94) | 0.39<br>(0.70)  | -1.00<br>(0.32) | 0.04<br>(3.00)  | -0.18<br>(3.49) | 0.57<br>(4.41)   | 1.47<br>(2.60) | 1.45<br>(3.18) | 2.19<br>(3.85)  | 0.95 | 0.92 | 0.91 | 0.95 (0.91-0.97) | 0.93 (0.87-0.96) | 0.91 (0.84-0.95) |
| Intracranial volume (ml)                             | 1511.53<br>(214.93) | 1507.06<br>(221.30) | 1506.74<br>(215.21) | 1529.3<br>3<br>(199.68) | 14.22 | 14.68 | 14.28 | 13.06 | 0.99<br>(0.33)  | 4.78<br>(0.00)  | -2.89<br>(0.01) | -0.37<br>(2.55) | -0.32<br>(0.46) | 1.33<br>(3.08)   | 0.79<br>(2.45) | 0.40<br>(0.39) | 1.38<br>(3.06)  | 0.99 | 1.00 | 0.98 | 0.99 (0.98-0.99) | 1.00 (1.00-1.00) | 0.98 (0.95-0.99) |
| Total brain volume without ventricles (ml)           | 1011.87<br>(113.09) | 1009.93<br>(115.62) | 1011.07<br>(113.24) | 1012.5<br>8<br>(113.74) | 11.18 | 11.45 | 11.20 | 11.23 | 0.95<br>(0.35)  | 1.00<br>(0.32)  | -1.09<br>(0.28) | -0.22<br>(1.40) | -0.08<br>(0.53) | 0.06<br>(0.42)   | 0.52<br>(1.32) | 0.40<br>(0.36) | 0.32<br>(0.27)  | 0.99 | 1.00 | 1.00 | 0.99 (0.99-1.00) | 1.00 (1.00-1.00) | 1.00 (1.00-1.00) |

Abbreviations: SD = standard deviation; Orig = original scan; FS df = FreeSurfer defacing; FSL df = FSL defacing; FM = Face Masking; t = t-statistic; p=p-value; PD = Average Percentage Difference; CI = Confidence Interval.

**Table S4. Effects of de-identification on brain measures in older adults diagnosed with Alzheimer’s disease.**

| Brain metric                          | Mean (SD)        |                  |                  |                  | Coefficient of Variation |       |        |       | Paired t-test t(p) |                 |                 | Signed PD in %  |                  |                  | Absolute PD (%) |                  |                  | Pearson’s r |        |      | ICC (95% CI)     |                  |                  |  |
|---------------------------------------|------------------|------------------|------------------|------------------|--------------------------|-------|--------|-------|--------------------|-----------------|-----------------|-----------------|------------------|------------------|-----------------|------------------|------------------|-------------|--------|------|------------------|------------------|------------------|--|
|                                       | Orig             | FS df            | FSL df           | FM               | Orig                     | FS df | FSL df | FM    | FS df              | FSL df          | FM              | FS df           | FSL df           | FM               | FS df           | FSL df           | FM               | FS df       | FSL df | FM   | FS df            | FSL df           | FM               |  |
| <b>Subcortical volume (ml)</b>        |                  |                  |                  |                  |                          |       |        |       |                    |                 |                 |                 |                  |                  |                 |                  |                  |             |        |      |                  |                  |                  |  |
| Left thalamus                         | 6.36<br>(0.94)   | 6.35<br>(0.93)   | 6.38<br>(0.98)   | 6.33<br>(0.91)   | 14.78                    | 14.61 | 15.41  | 14.36 | 0.15<br>(0.88)     | -0.44<br>(0.66) | 0.44<br>(0.66)  | -0.10<br>(4.57) | 0.23<br>(3.24)   | -0.43<br>(4.73)  | 2.78<br>(3.58)  | 2.72<br>(1.67)   | 3.10<br>(3.53)   | 0.94        | 0.98   | 0.93 | 0.94 (0.86-0.97) | 0.98 (0.94-0.99) | 0.94 (0.85-0.97) |  |
| Left caudatus                         | 3.15<br>(0.48)   | 3.16<br>(0.48)   | 3.12<br>(0.46)   | 3.15<br>(0.48)   | 15.37                    | 15.36 | 14.80  | 15.15 | -0.23<br>(0.82)    | 0.66<br>(0.51)  | -0.19<br>(0.85) | 0.22<br>(4.42)  | -0.62<br>(5.23)  | 0.22<br>(3.52)   | 2.75<br>(3.41)  | 2.93<br>(4.33)   | 2.25<br>(2.68)   | 0.95        | 0.94   | 0.97 | 0.96 (0.90-0.98) | 0.94 (0.86-0.97) | 0.97 (0.93-0.99) |  |
| Left putamen                          | 3.93<br>(0.63)   | 4.00<br>(0.52)   | 3.94<br>(0.64)   | 3.95<br>(0.57)   | 16.07                    | 13.00 | 16.35  | 14.47 | -1.27<br>(0.22)    | -0.43<br>(0.67) | -0.63<br>(0.54) | 2.41<br>(9.08)  | 0.31<br>(3.41)   | 0.98<br>(6.69)   | 3.60<br>(8.66)  | 2.42<br>(2.37)   | 2.59<br>(6.22)   | 0.91        | 0.98   | 0.96 | 0.89 (0.75-0.95) | 0.98 (0.95-0.99) | 0.95 (0.89-0.98) |  |
| Left pallidum                         | 1.91<br>(0.22)   | 1.90<br>(0.21)   | 1.89<br>(0.18)   | 1.89<br>(0.20)   | 11.65                    | 10.84 | 9.71   | 10.49 | 0.56<br>(0.58)     | 0.23<br>(0.82)  | 0.79<br>(0.44)  | -0.36<br>(3.38) | -0.09<br>(5.61)  | -0.73<br>(4.87)  | 2.52<br>(2.22)  | 4.57<br>(3.09)   | 3.53<br>(3.36)   | 0.95        | 0.88   | 0.91 | 0.95 (0.88-0.98) | 0.87 (0.70-0.94) | 0.90 (0.78-0.96) |  |
| Left hippocampus                      | 3.04<br>(0.50)   | 3.01<br>(0.52)   | 3.02<br>(0.50)   | 3.00<br>(0.50)   | 16.53                    | 17.26 | 16.45  | 16.63 | 1.31<br>(0.20)     | 0.80<br>(0.43)  | 3.28<br>(0.00)  | -1.02<br>(3.27) | -0.47<br>(2.98)  | -1.38<br>(2.04)  | 2.71<br>(2.02)  | 2.38<br>(1.79)   | 1.83<br>(1.63)   | 0.98        | 0.98   | 0.99 | 0.98 (0.96-0.99) | 0.98 (0.96-0.99) | 0.99 (0.96-1.00) |  |
| Left amygdala                         | 1.18<br>(0.22)   | 1.20<br>(0.23)   | 1.17<br>(0.22)   | 1.15<br>(0.21)   | 18.34                    | 19.58 | 18.45  | 18.63 | -1.67<br>(0.11)    | 0.35<br>(0.73)  | 2.28<br>(0.03)  | 1.80<br>(5.31)  | -0.37<br>(4.45)  | -2.24<br>(5.12)  | 4.27<br>(3.53)  | 3.66<br>(2.44)   | 4.11<br>(3.71)   | 0.96        | 0.97   | 0.97 | 0.95 (0.89-0.98) | 0.97 (0.94-0.99) | 0.97 (0.91-0.99) |  |
| Left accumbens                        | 0.34<br>(0.10)   | 0.34<br>(0.10)   | 0.34<br>(0.10)   | 0.33<br>(0.10)   | 30.67                    | 30.69 | 28.15  | 29.90 | -0.07<br>(0.94)    | -0.36<br>(0.72) | 1.36<br>(0.19)  | 0.04<br>(10.52) | 1.23<br>(9.79)   | -2.98<br>(12.92) | 8.75<br>(5.53)  | 7.27<br>(6.49)   | 9.87<br>(8.61)   | 0.94        | 0.97   | 0.94 | 0.95 (0.88-0.98) | 0.96 (0.92-0.99) | 0.94 (0.86-0.97) |  |
| Right thalamus                        | 6.08<br>(0.73)   | 6.15<br>(0.79)   | 6.11<br>(0.80)   | 6.18<br>(0.82)   | 11.94                    | 12.84 | 13.03  | 13.21 | -1.97<br>(0.06)    | -0.52<br>(0.61) | -2.07<br>(0.05) | 1.10<br>(2.51)  | 0.40<br>(4.11)   | 1.45<br>(3.04)   | 2.02<br>(1.82)  | 2.40<br>(3.32)   | 2.25<br>(2.47)   | 0.98        | 0.94   | 0.97 | 0.97 (0.93-0.99) | 0.94 (0.86-0.97) | 0.95 (0.89-0.98) |  |
| Right caudatus                        | 3.23<br>(0.42)   | 3.27<br>(0.44)   | 3.23<br>(0.43)   | 3.23<br>(0.45)   | 12.95                    | 13.49 | 13.35  | 13.81 | -2.73<br>(0.01)    | 0.06<br>(0.95)  | 0.15<br>(0.88)  | 1.26<br>(2.15)  | -0.08<br>(3.25)  | -0.23<br>(3.65)  | 1.72<br>(1.79)  | 2.21<br>(2.34)   | 2.27<br>(2.82)   | 0.99        | 0.97   | 0.96 | 0.98 (0.94-0.99) | 0.97 (0.92-0.99) | 0.96 (0.91-0.98) |  |
| Right putamen                         | 4.04<br>(0.61)   | 4.07<br>(0.62)   | 4.09<br>(0.63)   | 4.03<br>(0.58)   | 15.22                    | 15.31 | 15.44  | 14.47 | -1.29<br>(0.21)    | -2.74<br>(0.01) | 0.33<br>(0.74)  | 0.88<br>(3.61)  | 1.17<br>(1.96)   | -0.18<br>(3.87)  | 2.47<br>(2.73)  | 1.89<br>(1.25)   | 2.38<br>(3.02)   | 0.98        | 0.99   | 0.96 | 0.98 (0.95-0.99) | 0.99 (0.96-1.00) | 0.96 (0.91-0.98) |  |
| Right pallidum                        | 1.78<br>(0.23)   | 1.77<br>(0.22)   | 1.79<br>(0.23)   | 1.77<br>(0.23)   | 13.02                    | 12.40 | 12.80  | 12.83 | 1.33<br>(0.20)     | -0.34<br>(0.74) | 0.50<br>(0.62)  | -1.06<br>(3.94) | 0.28<br>(3.61)   | -0.73<br>(6.18)  | 3.26<br>(2.36)  | 3.05<br>(1.83)   | 4.09<br>(4.61)   | 0.95        | 0.96   | 0.87 | 0.95 (0.89-0.98) | 0.96 (0.91-0.98) | 0.87 (0.71-0.94) |  |
| Right hippocampus                     | 3.23<br>(0.56)   | 3.20<br>(0.57)   | 3.20<br>(0.55)   | 3.21<br>(0.54)   | 17.35                    | 17.88 | 17.08  | 16.95 | 2.10<br>(0.05)     | 1.90<br>(0.07)  | 2.13<br>(0.05)  | -1.09<br>(2.47) | -0.80<br>(2.58)  | -0.68<br>(2.01)  | 2.03<br>(1.74)  | 1.99<br>(1.79)   | 1.70<br>(1.24)   | 0.99        | 0.99   | 1.00 | 0.99 (0.98-1.00) | 0.99 (0.98-1.00) | 0.99 (0.98-1.00) |  |
| Right amygdala                        | 1.46<br>(0.28)   | 1.47<br>(0.26)   | 1.45<br>(0.27)   | 1.45<br>(0.29)   | 19.38                    | 18.00 | 18.89  | 19.86 | -0.96<br>(0.35)    | 0.43<br>(0.67)  | 1.12<br>(0.28)  | 0.98<br>(3.70)  | -0.25<br>(3.31)  | -0.86<br>(3.26)  | 2.82<br>(2.53)  | 2.60<br>(1.99)   | 2.71<br>(1.92)   | 0.99        | 0.98   | 0.99 | 0.99 (0.97-0.99) | 0.98 (0.96-0.99) | 0.99 (0.97-0.99) |  |
| Right accumbens                       | 0.43<br>(0.10)   | 0.44<br>(0.11)   | 0.44<br>(0.10)   | 0.43<br>(0.10)   | 23.71                    | 25.14 | 23.21  | 23.26 | -2.32<br>(0.03)    | -1.36<br>(0.19) | -0.76<br>(0.46) | 2.82<br>(6.20)  | 2.24<br>(7.37)   | 1.40<br>(7.38)   | 4.42<br>(5.12)  | 4.92<br>(5.85)   | 5.94<br>(4.43)   | 0.97        | 0.95   | 0.95 | 0.96 (0.88-0.98) | 0.95 (0.88-0.98) | 0.95 (0.90-0.98) |  |
| <b>Ventricular volume (ml)</b>        |                  |                  |                  |                  |                          |       |        |       |                    |                 |                 |                 |                  |                  |                 |                  |                  |             |        |      |                  |                  |                  |  |
| Third ventricle                       | 2.23<br>(0.72)   | 2.21<br>(0.68)   | 2.17<br>(0.64)   | 2.18<br>(0.64)   | 32.41                    | 30.92 | 29.63  | 29.24 | 0.58<br>(0.57)     | 0.80<br>(0.43)  | 0.65<br>(0.52)  | -0.62<br>(4.57) | -1.98<br>(10.85) | -1.30<br>(9.87)  | 2.34<br>(3.94)  | 3.89<br>(10.30)  | 3.75<br>(9.19)   | 0.98        | 0.88   | 0.90 | 0.98 (0.95-0.99) | 0.88 (0.73-0.95) | 0.90 (0.77-0.96) |  |
| Left lateral ventricle                | 26.17<br>(12.03) | 26.17<br>(12.01) | 26.10<br>(11.79) | 26.20<br>(12.03) | 45.98                    | 45.90 | 45.17  | 45.91 | 0.04<br>(0.96)     | 0.54<br>(0.60)  | -0.78<br>(0.44) | 0.00<br>(0.55)  | -0.03<br>(1.43)  | 0.18<br>(0.82)   | 0.44<br>(0.32)  | 0.84<br>(1.15)   | 0.61<br>(0.56)   | 1.00        | 1.00   | 1.00 | 1.00 (1.00-1.00) | 1.00 (1.00-1.00) | 1.00 (1.00-1.00) |  |
| Left inferior lateral ventricle       | 1.48<br>(1.21)   | 1.49<br>(1.22)   | 1.48<br>(1.18)   | 1.47<br>(1.19)   | 81.54                    | 81.49 | 80.11  | 80.77 | -0.39<br>(0.70)    | 0.25<br>(0.80)  | 0.42<br>(0.68)  | 1.14<br>(7.55)  | 1.42<br>(8.78)   | 0.22<br>(8.28)   | 5.77<br>(4.84)  | 5.37<br>(7.00)   | 6.62<br>(4.77)   | 1.00        | 1.00   | 1.00 | 1.00 (0.99-1.00) | 1.00 (0.99-1.00) | 1.00 (0.99-1.00) |  |
| Right lateral ventricle               | 22.63<br>(8.89)  | 22.61<br>(8.89)  | 22.70<br>(9.07)  | 22.59<br>(8.89)  | 39.31                    | 39.33 | 39.94  | 39.33 | 0.45<br>(0.66)     | -1.09<br>(0.29) | 0.72<br>(0.48)  | -0.08<br>(0.74) | 0.16<br>(0.84)   | -0.12<br>(0.76)  | 0.64<br>(0.35)  | 0.52<br>(0.67)   | 0.58<br>(0.48)   | 1.00        | 1.00   | 1.00 | 1.00 (1.00-1.00) | 1.00 (1.00-1.00) | 1.00 (1.00-1.00) |  |
| Right inferior lateral ventricle      | 1.27<br>(0.98)   | 1.30<br>(1.01)   | 1.29<br>(1.00)   | 1.26<br>(0.97)   | 76.96                    | 78.35 | 77.73  | 76.88 | -1.89<br>(0.07)    | -1.52<br>(0.14) | 0.48<br>(0.64)  | 1.43<br>(5.36)  | 1.14<br>(3.74)   | -0.50<br>(3.88)  | 4.34<br>(3.34)  | 2.83<br>(2.64)   | 2.95<br>(2.49)   | 1.00        | 1.00   | 1.00 | 1.00 (0.99-1.00) | 1.00 (1.00-1.00) | 1.00 (1.00-1.00) |  |
| <b>Local cortical volume (ml)</b>     |                  |                  |                  |                  |                          |       |        |       |                    |                 |                 |                 |                  |                  |                 |                  |                  |             |        |      |                  |                  |                  |  |
| Left banks superior temporal sulcus   | 1.82<br>(0.34)   | 1.82<br>(0.33)   | 1.82<br>(0.32)   | 1.80<br>(0.34)   | 18.48                    | 18.33 | 17.64  | 18.70 | 0.15<br>(0.88)     | 0.00<br>(1.00)  | 1.13<br>(0.27)  | -0.15<br>(4.61) | 0.14<br>(4.56)   | -1.17<br>(4.86)  | 3.25<br>(3.19)  | 3.40<br>(2.96)   | 4.05<br>(2.80)   | 0.97        | 0.97   | 0.97 | 0.97 (0.92-0.99) | 0.97 (0.94-0.99) | 0.97 (0.92-0.99) |  |
| Left caudal anterior cingulate cortex | 1.51<br>(0.46)   | 1.56<br>(0.41)   | 1.54<br>(0.38)   | 1.55<br>(0.41)   | 30.44                    | 26.34 | 24.73  | 26.42 | -1.39<br>(0.18)    | -0.96<br>(0.35) | -1.26<br>(0.22) | 5.12<br>(18.68) | 4.64<br>(18.24)  | 4.93<br>(19.05)  | 8.78<br>(17.19) | 7.69<br>(17.13)  | 9.20<br>(17.30)  | 0.94        | 0.95   | 0.94 | 0.93 (0.85-0.97) | 0.93 (0.85-0.97) | 0.93 (0.84-0.97) |  |
| Left caudal middle frontal gyrus      | 4.97<br>(0.96)   | 4.94<br>(0.98)   | 4.94<br>(0.99)   | 4.94<br>(0.96)   | 19.40                    | 19.87 | 19.93  | 19.43 | 1.09<br>(0.29)     | 0.87<br>(0.39)  | 0.80<br>(0.43)  | -0.63<br>(2.32) | -0.54<br>(2.62)  | -0.50<br>(2.97)  | 2.03<br>(1.23)  | 1.88<br>(1.86)   | 2.35<br>(1.81)   | 0.99        | 0.99   | 0.99 | 0.99 (0.98-1.00) | 0.99 (0.98-1.00) | 0.99 (0.98-1.00) |  |
| Left cuneus                           | 2.77<br>(0.43)   | 2.77<br>(0.45)   | 2.78<br>(0.45)   | 2.76<br>(0.42)   | 15.69                    | 16.13 | 16.05  | 15.34 | 0.25<br>(0.80)     | -0.52<br>(0.61) | 0.40<br>(0.70)  | -0.19<br>(2.78) | 0.29<br>(3.22)   | -0.16<br>(2.90)  | 2.21<br>(1.62)  | 2.40<br>(2.10)   | 2.24<br>(1.78)   | 0.98        | 0.98   | 0.99 | 0.99 (0.96-0.99) | 0.98 (0.96-0.99) | 0.99 (0.97-0.99) |  |
| Left entorhinal cortex                | 1.48<br>(0.43)   | 1.50<br>(0.41)   | 1.57<br>(0.34)   | 1.56<br>(0.38)   | 29.03                    | 27.29 | 21.87  | 24.21 | -0.69<br>(0.50)    | -1.82<br>(0.08) | -2.08<br>(0.05) | 1.90<br>(8.85)  | 7.82<br>(17.36)  | 6.33<br>(13.44)  | 6.83<br>(5.76)  | 11.63<br>(14.96) | 10.75<br>(10.07) | 0.95        | 0.83   | 0.92 | 0.95 (0.90-0.98) | 0.79 (0.56-0.91) | 0.90 (0.76-0.96) |  |
| Left fusiform gyrus                   | 7.86<br>(1.35)   | 7.92<br>(1.29)   | 7.87<br>(1.37)   | 7.93<br>(1.32)   | 17.19                    | 16.30 | 17.42  | 16.62 | -1.36<br>(0.19)    | -0.20<br>(0.84) | -1.21<br>(0.24) | 0.93<br>(3.16)  | 0.02<br>(3.82)   | 0.88<br>(3.92)   | 1.91<br>(2.66)  | 2.42<br>(2.91)   | 2.39<br>(3.19)   | 0.99        | 0.99   | 0.98 | 0.99 (0.97-0.99) | 0.99 (0.97-0.99) | 0.98 (0.96-0.99) |  |
| Left inferior parietal cortex         | 8.85<br>(2.06)   | 8.82<br>(2.00)   | 8.87<br>(2.11)   | 8.90<br>(2.07)   | 23.23                    | 22.68 | 23.74  | 23.26 | 0.75<br>(0.46)     | -0.28<br>(0.78) | -0.90<br>(0.38) | -0.19<br>(2.03) | 0.03<br>(2.27)   | 0.56<br>(3.21)   | 1.66<br>(1.13)  | 1.88<br>(1.21)   | 2.55<br>(1.95)   | 1.00        | 0.99   | 0.99 | 1.00 (0.99-1.00) | 0.99 (0.99-1.00) | 0.99 (0.98-1.00) |  |
| Left inferior temporal gyrus          | 8.48<br>(1.31)   | 8.55<br>(1.40)   | 8.53<br>(1.36)   | 8.50<br>(1.31)   | 15.44                    | 16.41 | 16.00  | 15.43 | -1.59<br>(0.13)    | -0.71<br>(0.49) | -0.54<br>(0.59) | 0.72<br>(2.48)  | 0.41<br>(3.62)   | 0.27<br>(2.59)   | 2.13<br>(1.40)  | 3.00<br>(1.96)   | 2.05<br>(1.55)   | 0.99        | 0.98   | 0.99 | 0.99 (0.97-0.99) | 0.98 (0.94-0.99) | 0.99 (0.97-0.99) |  |
| Left isthmus cingulate cortex         | 2.26<br>(0.53)   | 2.24<br>(0.53)   | 2.26<br>(0.52)   | 2.30<br>(0.51)   | 23.39                    | 23.71 | 23.07  | 22.39 | 0.74<br>(0.47)     | 0.15<br>(0.88)  | -1.64<br>(0.12) | -0.87<br>(5.49) | -0.09<br>(4.30)  | 1.66<br>(4.82)   | 4.37<br>(3.30)  | 3.19<br>(2.80)   | 3.70<br>(3.42)   | 0.97        | 0.99   | 0.98 | 0.97 (0.94-0.99) | 0.99 (0.97-1.00) | 0.98 (0.95-0.99) |  |
| Left lateral occipital cortex         | 10.70<br>(1.86)  | 10.77<br>(1.92)  | 10.73<br>(1.80)  | 10.70<br>(1.88)  | 17.41                    | 17.83 | 16.75  | 17.58 | -1.55<br>(0.14)    | -0.56<br>(0.58) | -0.16<br>(0.87) | 0.58<br>(2.14)  | 0.42<br>(2.55)   | 0.01<br>(1.77)   | 1.59<br>(1.52)  | 1.97<br>(1.62)   | 1.32<br>(1.14)   | 0.99        | 0.99   | 1.00 | 0.99 (0.98-1.00) | 0.99 (0.97-1.00) | 1.00 (0.99-1.00) |  |
| Left lateral orbitofrontal cortex     | 6.64<br>(0.81)   | 6.62<br>(0.77)   | 6.60<br>(0.80)   | 6.65<br>(0.76)   | 12.23                    | 11.67 | 12.17  | 11.50 | 0.50<br>(0.62)     | 0.84<br>(0.41)  | -0.27<br>(0.79) | -0.18<br>(2.12) | -0.48<br>(2.61)  | 0.24<br>(2.65)   | 1.73<br>(1.18)  | 2.09<br>(1.57)   | 2.02<br>(1.68)   | 0.98        | 0.98   | 0.98 | 0.98 (0.96-0.99) | 0.98 (0.94-0.99) | 0.98 (0.94-0.99) |  |
| Left lingual gyrus                    | 6.10<br>(1.07)   | 6.07<br>(1.10)   | 6.10<br>(1.08)   | 6.06<br>(1.05)   | 17.51                    | 18.07 | 17.75  | 17.31 | 1.31<br>(0.20)     | -0.18<br>(0.86) | 0.34<br>(0.74)  | -0.58<br>(1.83) | 0.08<br>(2.11)   | -0.08<br>(2.22)  | 1.55<br>(1.09)  | 1.58<br>(1.35)   | 1.58<br>(1.52)   | 1.00        | 0.99   | 0.99 | 0.99 (0.99-1.00) | 0.99 (0.98-1.00) | 0.99 (0.98-1.00) |  |
| Left medial orbitofrontal cortex      | 4.50<br>(0.52)   | 4.50<br>(0.57)   | 4.54<br>(0.50)   | 4.51<br>(0.49)   | 11.63                    | 12.65 | 11.00  | 10.77 | 0.09<br>(0.93)     | -1.02<br>(0.32) | -0.09<br>(0.93) | -0.22<br>(5.94) | 0.83<br>(3.43)   | 0.20<br>(5.23)   | 4.05<br>(4.26)  | 3.03<br>(1.69)   | 3.68<br>(3.64)   | 0.88        | 0.95   | 0.90 | 0.88             |                  |                  |  |



|                                        |                 |                 |                 |                 |       |       |       |       |                 |                 |                 |                  |                  |                 |                 |                  |                  |      |      |      |                  |                  |                  |
|----------------------------------------|-----------------|-----------------|-----------------|-----------------|-------|-------|-------|-------|-----------------|-----------------|-----------------|------------------|------------------|-----------------|-----------------|------------------|------------------|------|------|------|------------------|------------------|------------------|
| Left middle temporal gyrus             | 8.42<br>(1.38)  | 8.35<br>(1.47)  | 8.31<br>(1.40)  | 8.33<br>(1.45)  | 16.41 | 17.55 | 16.80 | 17.38 | 1.50<br>(0.15)  | 2.68<br>(0.01)  | 1.99<br>(0.06)  | -1.01<br>(2.98)  | -1.40<br>(2.39)  | -1.25<br>(2.82) | 1.93<br>(2.46)  | 2.15<br>(1.71)   | 2.16<br>(2.16)   | 0.99 | 0.99 | 0.99 | 0.99 (0.97-1.00) | 0.99 (0.96-1.00) | 0.99 (0.97-1.00) |
| Left parahippocampal gyrus             | 1.69<br>(0.31)  | 1.71<br>(0.33)  | 1.70<br>(0.29)  | 1.71<br>(0.31)  | 18.24 | 19.14 | 17.28 | 17.84 | -1.27<br>(0.22) | -0.41<br>(0.69) | -1.52<br>(0.14) | 0.87<br>(4.10)   | 0.60<br>(5.13)   | 1.66<br>(5.05)  | 3.58<br>(2.06)  | 3.46<br>(3.77)   | 3.77<br>(3.69)   | 0.98 | 0.97 | 0.97 | 0.98 (0.95-0.99) | 0.97 (0.93-0.99) | 0.97 (0.92-0.99) |
| Left paracentral lobule                | 3.12<br>(0.39)  | 3.08<br>(0.38)  | 3.08<br>(0.36)  | 3.11<br>(0.39)  | 12.50 | 12.47 | 11.55 | 12.67 | 1.79<br>(0.09)  | 2.20<br>(0.04)  | 0.24<br>(0.81)  | -1.25<br>(3.23)  | -1.20<br>(2.83)  | -0.18<br>(2.83) | 2.45<br>(2.41)  | 2.58<br>(1.61)   | 2.19<br>(1.74)   | 0.97 | 0.98 | 0.97 | 0.96 (0.91-0.98) | 0.97 (0.92-0.99) | 0.98 (0.94-0.99) |
| Left pars opercularis                  | 3.85<br>(0.51)  | 3.90<br>(0.51)  | 3.88<br>(0.55)  | 3.83<br>(0.50)  | 13.18 | 13.10 | 14.30 | 13.04 | -1.91<br>(0.07) | -1.16<br>(0.26) | 1.08<br>(0.29)  | 1.18<br>(2.76)   | 0.58<br>(2.98)   | -0.44<br>(1.98) | 2.29<br>(1.90)  | 2.21<br>(2.02)   | 1.70<br>(1.05)   | 0.98 | 0.98 | 0.99 | 0.97 (0.93-0.99) | 0.98 (0.95-0.99) | 0.99 (0.97-1.00) |
| Left pars orbitalis                    | 2.15<br>(0.38)  | 2.10<br>(0.39)  | 2.13<br>(0.39)  | 2.10<br>(0.39)  | 17.58 | 18.52 | 18.11 | 18.70 | 2.40<br>(0.03)  | 1.34<br>(0.19)  | 2.99<br>(0.01)  | -2.50<br>(4.44)  | -1.09<br>(3.39)  | -2.37<br>(3.54) | 4.08<br>(2.96)  | 2.82<br>(2.10)   | 3.26<br>(2.70)   | 0.97 | 0.98 | 0.98 | 0.96 (0.90-0.99) | 0.98 (0.96-0.99) | 0.98 (0.91-0.99) |
| Left pars triangularis                 | 3.15<br>(0.39)  | 3.12<br>(0.40)  | 3.15<br>(0.41)  | 3.14<br>(0.41)  | 12.52 | 12.87 | 12.89 | 13.16 | 1.77<br>(0.09)  | 0.05<br>(0.96)  | 0.59<br>(0.56)  | -1.01<br>(2.65)  | -0.09<br>(3.20)  | -0.45<br>(3.17) | 2.30<br>(1.61)  | 2.57<br>(1.82)   | 2.31<br>(2.16)   | 0.98 | 0.97 | 0.98 | 0.98 (0.95-0.99) | 0.97 (0.93-0.99) | 0.98 (0.94-0.99) |
| Left pericalcarine cortex              | 1.95<br>(0.34)  | 1.94<br>(0.36)  | 1.94<br>(0.36)  | 1.96<br>(0.36)  | 17.33 | 18.39 | 18.60 | 18.50 | 0.58<br>(0.57)  | 0.24<br>(0.81)  | -0.52<br>(0.61) | -0.65<br>(4.01)  | -0.42<br>(4.25)  | 0.21<br>(4.15)  | 3.44<br>(2.03)  | 3.41<br>(2.46)   | 2.96<br>(2.84)   | 0.98 | 0.98 | 0.98 | 0.98 (0.94-0.99) | 0.97 (0.94-0.99) | 0.98 (0.95-0.99) |
| Left postcentral gyrus                 | 8.38<br>(1.10)  | 8.38<br>(1.08)  | 8.34<br>(1.12)  | 8.38<br>(1.10)  | 13.09 | 12.93 | 13.43 | 13.06 | -0.04<br>(0.97) | 1.65<br>(0.11)  | -0.12<br>(0.90) | 0.03<br>(1.39)   | -0.56<br>(1.50)  | 0.03<br>(1.45)  | 0.98<br>(0.96)  | 1.35<br>(0.82)   | 1.07<br>(0.95)   | 0.99 | 0.99 | 0.99 | 0.99 (0.99-1.00) | 0.99 (0.98-1.00) | 0.99 (0.99-1.00) |
| Left posterior cingulate cortex        | 2.55<br>(0.59)  | 2.55<br>(0.56)  | 2.59<br>(0.57)  | 2.55<br>(0.59)  | 23.25 | 21.88 | 22.04 | 22.98 | -0.03<br>(0.98) | -0.60<br>(0.55) | -0.22<br>(0.83) | 0.30<br>(5.49)   | 1.81<br>(15.14)  | 0.37<br>(5.98)  | 3.84<br>(3.84)  | 7.00<br>(13.47)  | 4.17<br>(4.20)   | 0.98 | 0.86 | 0.98 | 0.98 (0.94-0.99) | 0.86 (0.70-0.94) | 0.98 (0.95-0.99) |
| Left precentral gyrus                  | 11.99<br>(1.37) | 11.98<br>(1.40) | 11.97<br>(1.41) | 11.97<br>(1.36) | 11.38 | 11.66 | 11.80 | 11.40 | 0.22<br>(0.83)  | 0.46<br>(0.65)  | 0.49<br>(0.63)  | -0.12<br>(1.76)  | -0.21<br>(1.67)  | -0.17<br>(1.56) | 1.24<br>(1.22)  | 1.28<br>(1.04)   | 1.34<br>(0.78)   | 0.99 | 0.99 | 0.99 | 0.99 (0.98-1.00) | 0.99 (0.98-1.00) | 0.99 (0.98-1.00) |
| Left precuneus                         | 7.85<br>(1.40)  | 7.86<br>(1.42)  | 7.82<br>(1.44)  | 7.82<br>(1.40)  | 17.77 | 18.13 | 18.43 | 17.85 | -0.18<br>(0.86) | 1.09<br>(0.29)  | 1.29<br>(0.21)  | 0.02<br>(1.69)   | -0.54<br>(2.12)  | -0.44<br>(1.65) | 1.22<br>(1.14)  | 1.66<br>(1.39)   | 1.36<br>(0.99)   | 1.00 | 0.99 | 1.00 | 1.00 (0.99-1.00) | 0.99 (0.99-1.00) | 1.00 (0.99-1.00) |
| Left rostral anterior cingulate cortex | 2.23<br>(0.62)  | 2.22<br>(0.49)  | 2.25<br>(0.55)  | 2.28<br>(0.59)  | 27.91 | 22.28 | 24.66 | 25.71 | 0.39<br>(0.70)  | -0.60<br>(0.56) | -1.49<br>(0.15) | 0.92<br>(10.07)  | 1.91<br>(9.44)   | 3.13<br>(10.36) | 5.49<br>(8.41)  | 4.73<br>(8.34)   | 5.69<br>(9.14)   | 0.97 | 0.98 | 0.97 | 0.95 (0.88-0.98) | 0.97 (0.94-0.99) | 0.97 (0.93-0.99) |
| Left rostral middle frontal gyrus      | 12.86<br>(2.26) | 12.90<br>(2.21) | 12.92<br>(2.25) | 12.87<br>(2.22) | 17.58 | 17.15 | 17.44 | 17.25 | -0.70<br>(0.49) | -0.97<br>(0.34) | -0.24<br>(0.81) | 0.37<br>(2.07)   | 0.47<br>(2.03)   | 0.15<br>(2.20)  | 1.67<br>(1.22)  | 1.49<br>(1.43)   | 1.71<br>(1.34)   | 0.99 | 0.99 | 0.99 | 0.99 (0.98-1.00) | 0.99 (0.98-1.00) | 0.99 (0.98-1.00) |
| Left superior frontal gyrus            | 18.59<br>(2.82) | 18.55<br>(2.72) | 18.56<br>(2.78) | 18.61<br>(2.80) | 15.16 | 14.66 | 14.97 | 15.04 | 0.70<br>(0.49)  | 0.63<br>(0.54)  | -0.42<br>(0.68) | -0.13<br>(1.16)  | -0.14<br>(1.26)  | 0.13<br>(1.30)  | 0.93<br>(0.67)  | 0.94<br>(0.83)   | 1.04<br>(0.76)   | 1.00 | 1.00 | 1.00 | 1.00 (0.99-1.00) | 1.00 (0.99-1.00) | 1.00 (0.99-1.00) |
| Left superior parietal cortex          | 11.20<br>(2.12) | 11.12<br>(2.04) | 11.16<br>(2.11) | 11.14<br>(2.08) | 18.92 | 18.33 | 18.89 | 18.66 | 1.94<br>(0.07)  | 1.06<br>(0.30)  | 1.40<br>(0.18)  | -0.66<br>(1.59)  | -0.39<br>(1.60)  | -0.53<br>(2.00) | 1.37<br>(1.00)  | 1.23<br>(1.07)   | 1.74<br>(1.05)   | 1.00 | 1.00 | 1.00 | 0.99 (0.99-1.00) | 1.00 (0.99-1.00) | 0.99 (0.99-1.00) |
| Left superior temporal gyrus           | 10.18<br>(1.37) | 10.22<br>(1.44) | 10.19<br>(1.46) | 10.26<br>(1.47) | 13.50 | 14.06 | 14.33 | 14.36 | -0.87<br>(0.40) | -0.24<br>(0.81) | -1.57<br>(0.13) | 0.30<br>(2.04)   | -0.02<br>(2.11)  | 0.69<br>(2.45)  | 1.59<br>(1.27)  | 1.61<br>(1.32)   | 1.99<br>(1.53)   | 0.99 | 0.99 | 0.99 | 0.99 (0.97-1.00) | 0.99 (0.98-1.00) | 0.98 (0.96-0.99) |
| Left supramarginal gyrus               | 9.05<br>(1.42)  | 9.10<br>(1.45)  | 9.04<br>(1.46)  | 9.08<br>(1.45)  | 15.66 | 15.89 | 16.12 | 15.97 | -1.46<br>(0.16) | 0.44<br>(0.66)  | -0.68<br>(0.50) | 0.46<br>(1.51)   | -0.22<br>(1.68)  | 0.20<br>(1.85)  | 1.20<br>(1.00)  | 1.36<br>(0.95)   | 1.34<br>(1.27)   | 1.00 | 1.00 | 0.99 | 0.99 (0.99-1.00) | 1.00 (0.99-1.00) | 0.99 (0.98-1.00) |
| Left frontal pole                      | 0.89<br>(0.16)  | 0.86<br>(0.13)  | 0.89<br>(0.13)  | 0.86<br>(0.15)  | 17.88 | 15.53 | 14.69 | 17.38 | 1.88<br>(0.07)  | 0.03<br>(0.98)  | 2.89<br>(0.01)  | -2.44<br>(6.98)  | 0.42<br>(7.53)   | -3.17<br>(5.34) | 6.04<br>(4.09)  | 6.58<br>(3.40)   | 4.98<br>(3.62)   | 0.92 | 0.91 | 0.96 | 0.90 (0.77-0.96) | 0.89 (0.76-0.95) | 0.94 (0.81-0.98) |
| Left temporal pole                     | 2.16<br>(0.30)  | 2.09<br>(0.29)  | 2.14<br>(0.33)  | 2.12<br>(0.27)  | 13.81 | 14.07 | 15.31 | 12.84 | 1.93<br>(0.07)  | 0.78<br>(0.44)  | 1.08<br>(0.29)  | -3.50<br>(8.72)  | -1.26<br>(6.51)  | -1.66<br>(8.34) | 7.19<br>(5.89)  | 5.54<br>(3.45)   | 6.04<br>(5.84)   | 0.81 | 0.90 | 0.83 | 0.80 (0.56-0.91) | 0.90 (0.78-0.96) | 0.83 (0.64-0.92) |
| Left transverse temporal gyrus         | 1.06<br>(0.17)  | 1.06<br>(0.18)  | 1.07<br>(0.16)  | 1.06<br>(0.17)  | 16.27 | 17.25 | 15.03 | 15.94 | 0.82<br>(0.42)  | -0.33<br>(0.74) | 0.73<br>(0.47)  | -0.94<br>(4.59)  | 0.47<br>(4.50)   | -0.50<br>(3.37) | 3.28<br>(3.27)  | 3.76<br>(2.39)   | 2.67<br>(2.03)   | 0.97 | 0.96 | 0.98 | 0.97 (0.93-0.99) | 0.96 (0.90-0.98) | 0.98 (0.95-0.99) |
| Left insula                            | 6.30<br>(0.80)  | 6.30<br>(0.83)  | 6.29<br>(0.75)  | 6.36<br>(0.86)  | 12.77 | 13.14 | 11.93 | 13.59 | 0.03<br>(0.97)  | 0.19<br>(0.85)  | -1.09<br>(0.29) | -0.06<br>(5.09)  | -0.03<br>(3.23)  | 0.83<br>(3.60)  | 3.20<br>(3.90)  | 2.21<br>(2.31)   | 2.57<br>(2.60)   | 0.91 | 0.96 | 0.96 | 0.91 (0.79-0.96) | 0.96 (0.91-0.98) | 0.95 (0.90-0.98) |
| Right banks superior temporal sulcus   | 1.73<br>(0.33)  | 1.73<br>(0.37)  | 1.71<br>(0.29)  | 1.74<br>(0.36)  | 19.31 | 21.48 | 17.07 | 20.74 | -0.15<br>(0.88) | 1.30<br>(0.21)  | -0.37<br>(0.71) | 0.09<br>(5.99)   | -0.88<br>(4.96)  | 0.60<br>(7.56)  | 4.42<br>(3.93)  | 3.41<br>(3.64)   | 5.42<br>(5.17)   | 0.94 | 0.98 | 0.92 | 0.94 (0.85-0.97) | 0.97 (0.92-0.99) | 0.92 (0.81-0.97) |
| Right caudal anterior cingulate cortex | 1.70<br>(0.35)  | 1.73<br>(0.35)  | 1.70<br>(0.35)  | 1.71<br>(0.37)  | 20.44 | 20.07 | 20.55 | 21.41 | -1.28<br>(0.21) | 0.77<br>(0.45)  | -0.01<br>(0.99) | 1.50<br>(5.91)   | -0.44<br>(2.56)  | -0.20<br>(6.62) | 4.31<br>(4.23)  | 2.15<br>(1.39)   | 4.44<br>(4.82)   | 0.97 | 0.99 | 0.96 | 0.96 (0.92-0.99) | 0.99 (0.98-1.00) | 0.96 (0.90-0.98) |
| Right caudal middle frontal gyrus      | 4.78<br>(0.89)  | 4.78<br>(0.90)  | 4.82<br>(0.92)  | 4.86<br>(0.92)  | 18.66 | 18.83 | 19.19 | 19.00 | 0.10<br>(0.92)  | -1.38<br>(0.18) | -2.93<br>(0.01) | -0.07<br>(2.06)  | 0.61<br>(2.54)   | 1.50<br>(2.74)  | 1.60<br>(1.24)  | 2.08<br>(1.52)   | 2.15<br>(2.25)   | 1.00 | 0.99 | 0.99 | 1.00 (0.99-1.00) | 0.99 (0.98-1.00) | 0.99 (0.96-1.00) |
| Right cuneus                           | 3.12<br>(0.56)  | 3.13<br>(0.58)  | 3.10<br>(0.54)  | 3.12<br>(0.57)  | 18.08 | 18.61 | 17.34 | 18.35 | -0.39<br>(0.70) | 0.80<br>(0.43)  | 0.27<br>(0.79)  | 0.16<br>(2.34)   | -0.49<br>(3.37)  | -0.17<br>(2.94) | 1.79<br>(1.46)  | 2.40<br>(2.37)   | 2.10<br>(2.01)   | 0.99 | 0.98 | 0.99 | 0.99 (0.98-1.00) | 0.98 (0.95-0.99) | 0.99 (0.97-1.00) |
| Right entorhinal cortex                | 1.49<br>(0.40)  | 1.46<br>(0.40)  | 1.46<br>(0.42)  | 1.56<br>(0.40)  | 26.56 | 27.39 | 28.98 | 25.56 | 0.63<br>(0.53)  | 0.56<br>(0.58)  | -1.15<br>(0.26) | -1.77<br>(14.05) | -2.56<br>(18.67) | 4.94<br>(21.35) | 9.44<br>(10.36) | 12.16<br>(14.16) | 14.65<br>(16.01) | 0.88 | 0.81 | 0.71 | 0.88 (0.74-0.95) | 0.82 (0.61-0.92) | 0.71 (0.43-0.87) |
| Right fusiform gyrus                   | 7.62<br>(1.18)  | 7.67<br>(1.18)  | 7.69<br>(1.16)  | 7.68<br>(1.22)  | 15.54 | 15.33 | 15.08 | 15.89 | -1.36<br>(0.19) | -1.66<br>(0.11) | -1.46<br>(0.16) | 0.73<br>(2.57)   | 1.09<br>(3.04)   | 0.83<br>(3.13)  | 2.10<br>(1.60)  | 2.48<br>(2.00)   | 2.52<br>(1.97)   | 0.99 | 0.98 | 0.99 | 0.99 (0.97-1.00) | 0.98 (0.96-0.99) | 0.98 (0.96-0.99) |
| Right inferior parietal cortex         | 10.96<br>(2.45) | 11.01<br>(2.56) | 10.97<br>(2.52) | 11.07<br>(2.54) | 22.32 | 23.24 | 22.95 | 22.94 | -0.74<br>(0.47) | -0.17<br>(0.87) | -1.64<br>(0.12) | 0.30<br>(2.85)   | -0.06<br>(2.05)  | 0.87<br>(2.66)  | 1.99<br>(2.02)  | 1.63<br>(1.21)   | 1.64<br>(2.25)   | 0.99 | 1.00 | 0.99 | 0.99 (0.98-1.00) | 1.00 (0.99-1.00) | 0.99 (0.98-1.00) |
| Right inferior temporal gyrus          | 8.20<br>(1.27)  | 8.21<br>(1.23)  | 8.25<br>(1.26)  | 8.24<br>(1.31)  | 15.52 | 15.04 | 15.23 | 15.85 | -0.19<br>(0.85) | -0.77<br>(0.45) | -0.68<br>(0.51) | 0.14<br>(3.49)   | 0.66<br>(4.25)   | 0.43<br>(3.89)  | 2.44<br>(2.45)  | 2.76<br>(3.25)   | 2.99<br>(2.44)   | 0.98 | 0.97 | 0.97 | 0.98 (0.95-0.99) | 0.97 (0.92-0.99) | 0.97 (0.94-0.99) |
| Right isthmus cingulate cortex         | 2.02<br>(0.51)  | 1.98<br>(0.48)  | 1.99<br>(0.53)  | 2.00<br>(0.53)  | 25.12 | 24.31 | 26.73 | 26.75 | 1.74<br>(0.10)  | 1.96<br>(0.06)  | 0.92<br>(0.37)  | -1.77<br>(5.09)  | -2.15<br>(5.04)  | -1.32<br>(5.13) | 3.71<br>(3.84)  | 3.59<br>(4.09)   | 3.32<br>(4.08)   | 0.98 | 0.99 | 0.99 | 0.98 (0.94-0.99) | 0.99 (0.97-0.99) | 0.98 (0.96-0.99) |
| Right lateral occipital cortex         | 10.60<br>(1.60) | 10.67<br>(1.69) | 10.64<br>(1.61) | 10.69<br>(1.72) | 15.07 | 15.84 | 15.14 | 16.06 | -1.78<br>(0.09) | -0.61<br>(0.55) | -2.09<br>(0.05) | 0.54<br>(1.68)   | 0.33<br>(2.63)   | 0.71<br>(1.79)  | 1.38<br>(1.06)  | 2.12<br>(1.52)   | 1.26<br>(1.45)   | 1.00 | 0.99 | 0.99 | 0.99 (0.98-1.00) | 0.99 (0.97-0.99) | 0.99 (0.98-1.00) |
| Right lateral orbitofrontal cortex     | 6.39<br>(0.77)  | 6.43<br>(0.73)  | 6.42<br>(0.73)  | 6.48<br>(0.76)  | 12.00 | 11.39 | 11.34 | 11.65 | -0.87<br>(0.39) | -0.60<br>(0.55) | -1.87<br>(0.08) | 0.66<br>(3.19)   | 0.47<br>(2.92)   | 1.47<br>(3.65)  | 2.46<br>(2.06)  | 1.97<br>(1.97)   | 3.07<br>(2.39)   | 0.96 | 0.97 | 0.95 | 0.96 (0.91-0.98) | 0.96 (0.92-0.99) | 0.95 (0.88-0.98) |
| Right lingual gyrus                    | 6.64<br>(1.31)  | 6.59<br>(1.27)  | 6.63<br>(1.29)  | 6.61<br>(1.29)  | 19.73 | 19.30 | 19.41 | 19.50 | 0.94<br>(0.36)  | 0.38<br>(0.71)  | 1.32<br>(0.20)  | -0.62<br>(3.07)  | -0.15<br>(2.12)  | -0.39<br>(1.85) | 1.73<br>(2.59)  | 1.57<br>(1.38)   | 1.39<br>(1.25)   | 0.98 | 0.99 | 1.00 | 0.98 (0.96-0.99) | 0.99 (0.98-1.00) | 1.00 (0.99-1.00) |
| Right medial orbitofrontal cortex      | 4.68<br>(0.51)  | 4.65<br>(0.51)  | 4.68<br>(0.51)  | 4.67<br>(0.48)  | 10.86 | 10.92 | 11.00 | 10.19 | 0.43<br>(0.67)  | -0.13<br>(0.90) | 0.14<br>(0.89)  | -0.42<br>(4.49)  | 0.06<br>(2.91)   | -0.02<br>(3.79) | 3.47<br>(2.78)  | 2.10<br>(1.96)   | 2.99<br>(2.24)   | 0.91 | 0.96 | 0.94 | 0.91 (0.79-0.96) | 0.97 (0.92-0.99) | 0.94 (0.86-0.97) |
| Right middle temporal gyrus            | 9.56<br>(1.56)  | 9.54<br>(1.56)  | 9.56<br>(1.57)  | 9.51<br>(1.62)  | 16.29 | 16.36 | 16.37 | 17.00 | 0.43<br>(0.67)  | -0.07<br>(0.95) | 0.95<br>(0.35)  | -0.20<br>(1.83)  | -0.01<br>(1.57)  | -0.63<br>(2.38) | 1.61<br>(0.84)  | 1.14<br>(1.05)   | 1.93<br>(1.47)   | 0.99 | 1.00 | 0.99 | 0.99 (0.98-1.00) | 1.00 (0.99-1.00) | 0.99 (0.98-1.00) |
| Right parahippocampal gyrus            | 1.65<br>(0.33)  | 1.66<br>(0.31)  | 1.65<br>(0.33)  | 1.67<br>(0.31)  | 19.98 | 18.55 | 20.05 | 18.51 | -0.16<br>(0.87) | 0               |                 |                  |                  |                 |                 |                  |                  |      |      |      |                  |                  |                  |

|                                                |                 |                 |                 |                 |       |       |       |       |                 |                 |                 |                 |                 |                  |                 |                  |                 |      |      |      |                  |                  |                  |
|------------------------------------------------|-----------------|-----------------|-----------------|-----------------|-------|-------|-------|-------|-----------------|-----------------|-----------------|-----------------|-----------------|------------------|-----------------|------------------|-----------------|------|------|------|------------------|------------------|------------------|
| Right pars triangularis                        | 3.52<br>(0.58)  | 3.51<br>(0.59)  | 3.52<br>(0.56)  | 3.52<br>(0.57)  | 16.49 | 16.88 | 15.94 | 16.28 | 0.52<br>(0.61)  | 0.10<br>(0.92)  | 0.19<br>(0.85)  | -0.36<br>(2.49) | 0.02<br>(3.13)  | -0.10<br>(2.82)  | 2.01<br>(1.45)  | 2.20<br>(2.18)   | 2.25<br>(1.63)  | 0.99 | 0.98 | 0.98 | 0.99 (0.98-1.00) | 0.98 (0.96-0.99) | 0.98 (0.96-0.99) |
| Right pericalcarine cortex                     | 2.24<br>(0.47)  | 2.22<br>(0.47)  | 2.21<br>(0.47)  | 2.22<br>(0.44)  | 21.14 | 21.04 | 21.04 | 19.94 | 1.38<br>(0.18)  | 1.52<br>(0.14)  | 1.12<br>(0.28)  | -0.66<br>(2.17) | -1.17<br>(3.30) | -0.49<br>(2.86)  | 1.88<br>(1.20)  | 2.59<br>(2.30)   | 2.31<br>(1.68)  | 0.99 | 0.98 | 0.99 | 0.99 (0.98-1.00) | 0.98 (0.96-0.99) | 0.99 (0.97-1.00) |
| Right postcentral gyrus                        | 8.03<br>(1.11)  | 8.03<br>(1.14)  | 7.96<br>(1.13)  | 8.04<br>(1.16)  | 13.87 | 14.24 | 14.22 | 14.41 | 0.18<br>(0.86)  | 2.94<br>(0.01)  | -0.30<br>(0.77) | -0.11<br>(1.32) | -0.92<br>(1.44) | 0.02<br>(1.78)   | 1.01<br>(0.83)  | 1.39<br>(0.96)   | 1.43<br>(1.01)  | 1.00 | 1.00 | 0.99 | 1.00 (0.99-1.00) | 0.99 (0.98-1.00) | 0.99 (0.98-1.00) |
| Right posterior cingulate cortex               | 2.51<br>(0.62)  | 2.53<br>(0.62)  | 2.49<br>(0.65)  | 2.50<br>(0.66)  | 24.64 | 24.37 | 25.96 | 26.20 | -0.43<br>(0.67) | 0.86<br>(0.40)  | 0.05<br>(0.96)  | 0.93<br>(9.87)  | -1.18<br>(5.50) | -0.43<br>(12.66) | 5.76<br>(7.97)  | 3.45<br>(4.38)   | 6.77<br>(10.60) | 0.93 | 0.99 | 0.90 | 0.93 (0.85-0.97) | 0.99 (0.97-0.99) | 0.90 (0.77-0.96) |
| Right precentral gyrus                         | 12.15<br>(1.86) | 12.10<br>(1.82) | 12.06<br>(1.80) | 12.13<br>(1.89) | 15.32 | 15.04 | 14.90 | 15.58 | 1.39<br>(0.18)  | 1.82<br>(0.08)  | 0.36<br>(0.72)  | -0.39<br>(1.43) | -0.63<br>(1.63) | -0.18<br>(1.60)  | 1.32<br>(0.61)  | 1.41<br>(1.00)   | 1.23<br>(1.01)  | 1.00 | 0.99 | 0.99 | 1.00 (0.99-1.00) | 0.99 (0.98-1.00) | 0.99 (0.99-1.00) |
| Right precuneus                                | 8.29<br>(1.38)  | 8.23<br>(1.35)  | 8.23<br>(1.39)  | 8.25<br>(1.41)  | 16.68 | 16.44 | 16.87 | 17.07 | 1.90<br>(0.07)  | 2.57<br>(0.02)  | 1.53<br>(0.14)  | -0.63<br>(1.53) | -0.70<br>(1.27) | -0.52<br>(1.35)  | 1.09<br>(1.22)  | 1.07<br>(0.96)   | 1.09<br>(0.92)  | 1.00 | 1.00 | 1.00 | 0.99 (0.99-1.00) | 1.00 (0.99-1.00) | 1.00 (0.99-1.00) |
| Right rostral anterior cingulate cortex        | 1.82<br>(0.42)  | 1.82<br>(0.43)  | 1.81<br>(0.43)  | 1.83<br>(0.43)  | 22.83 | 23.80 | 23.52 | 23.45 | -0.16<br>(0.87) | 0.65<br>(0.52)  | -0.53<br>(0.60) | -0.12<br>(3.69) | -0.82<br>(4.63) | 0.27<br>(3.58)   | 2.97<br>(2.10)  | 3.66<br>(2.86)   | 2.55<br>(2.47)  | 0.99 | 0.97 | 0.99 | 0.99 (0.97-0.99) | 0.97 (0.94-0.99) | 0.99 (0.97-0.99) |
| Right rostral middle frontal gyrus             | 13.15<br>(1.59) | 13.15<br>(1.59) | 13.12<br>(1.50) | 13.10<br>(1.58) | 12.11 | 12.05 | 11.47 | 12.03 | 0.01<br>(0.99)  | 0.81<br>(0.42)  | 1.16<br>(0.26)  | 0.00<br>(2.07)  | -0.19<br>(1.48) | -0.39<br>(1.74)  | 1.55<br>(1.34)  | 1.20<br>(0.85)   | 1.23<br>(1.27)  | 0.98 | 0.99 | 0.99 | 0.99 (0.97-0.99) | 0.99 (0.98-1.00) | 0.99 (0.98-1.00) |
| Right superior frontal gyrus                   | 18.68<br>(3.10) | 18.62<br>(2.98) | 18.70<br>(3.04) | 18.73<br>(3.08) | 16.60 | 15.98 | 16.24 | 16.43 | 1.06<br>(0.30)  | -0.41<br>(0.69) | -1.06<br>(0.30) | -0.20<br>(1.36) | 0.19<br>(1.49)  | 0.32<br>(1.36)   | 1.12<br>(0.76)  | 1.04<br>(1.06)   | 1.11<br>(0.81)  | 1.00 | 1.00 | 1.00 | 1.00 (0.99-1.00) | 1.00 (0.99-1.00) | 1.00 (0.99-1.00) |
| Right superior parietal cortex                 | 11.04<br>(1.86) | 11.04<br>(1.87) | 11.05<br>(1.93) | 11.12<br>(1.92) | 16.89 | 16.96 | 17.45 | 17.26 | 0.15<br>(0.88)  | -0.14<br>(0.89) | -2.76<br>(0.01) | -0.05<br>(1.37) | -0.05<br>(2.72) | 0.63<br>(1.02)   | 1.12<br>(0.75)  | 1.78<br>(2.02)   | 0.93<br>(0.75)  | 1.00 | 0.99 | 1.00 | 1.00 (0.99-1.00) | 0.99 (0.98-1.00) | 1.00 (0.99-1.00) |
| Right superior temporal gyrus                  | 9.85<br>(1.19)  | 9.79<br>(1.26)  | 9.86<br>(1.24)  | 9.76<br>(1.22)  | 12.09 | 12.84 | 12.61 | 12.51 | 1.32<br>(0.20)  | -0.25<br>(0.80) | 1.92<br>(0.07)  | -0.69<br>(2.21) | 0.08<br>(2.58)  | -0.99<br>(2.58)  | 1.74<br>(1.50)  | 1.97<br>(1.61)   | 1.76<br>(2.10)  | 0.99 | 0.98 | 0.98 | 0.99 (0.96-0.99) | 0.98 (0.95-0.99) | 0.98 (0.95-0.99) |
| Right supramarginal gyrus                      | 8.33<br>(1.20)  | 8.36<br>(1.20)  | 8.34<br>(1.19)  | 8.37<br>(1.19)  | 14.46 | 14.29 | 14.30 | 14.19 | -1.14<br>(0.27) | -0.46<br>(0.65) | -1.38<br>(0.18) | 0.48<br>(1.90)  | 0.18<br>(1.65)  | 0.58<br>(1.79)   | 1.67<br>(0.96)  | 1.13<br>(1.19)   | 1.52<br>(1.08)  | 0.99 | 0.99 | 0.99 | 0.99 (0.98-1.00) | 0.99 (0.99-1.00) | 0.99 (0.98-1.00) |
| Right frontal pole                             | 1.02<br>(0.11)  | 1.01<br>(0.11)  | 1.05<br>(0.13)  | 1.00<br>(0.12)  | 10.35 | 10.94 | 12.06 | 12.39 | 0.71<br>(0.49)  | -2.05<br>(0.05) | 1.65<br>(0.11)  | -0.96<br>(5.93) | 2.53<br>(6.26)  | -2.19<br>(5.65)  | 4.46<br>(3.92)  | 5.50<br>(3.78)   | 4.41<br>(4.07)  | 0.84 | 0.86 | 0.89 | 0.84 (0.66-0.93) | 0.83 (0.61-0.93) | 0.87 (0.71-0.94) |
| Right temporal pole                            | 2.23<br>(0.32)  | 2.17<br>(0.34)  | 2.16<br>(0.35)  | 2.23<br>(0.32)  | 14.42 | 15.79 | 16.03 | 14.09 | 1.73<br>(0.10)  | 1.73<br>(0.10)  | -0.32<br>(0.75) | -2.78<br>(7.36) | -3.43<br>(8.78) | 0.36<br>(5.90)   | 5.72<br>(5.29)  | 7.30<br>(5.80)   | 4.93<br>(3.08)  | 0.90 | 0.84 | 0.93 | 0.89 (0.74-0.95) | 0.83 (0.63-0.93) | 0.93 (0.84-0.97) |
| Right transverse temporal gyrus                | 0.81<br>(0.18)  | 0.80<br>(0.16)  | 0.80<br>(0.16)  | 0.81<br>(0.17)  | 21.79 | 20.60 | 20.09 | 20.79 | 0.73<br>(0.47)  | 0.28<br>(0.78)  | -0.93<br>(0.36) | -0.56<br>(5.09) | -0.02<br>(4.10) | 1.12<br>(4.41)   | 4.00<br>(3.08)  | 3.49<br>(2.02)   | 3.98<br>(2.03)  | 0.97 | 0.98 | 0.98 | 0.97 (0.93-0.99) | 0.98 (0.95-0.99) | 0.98 (0.95-0.99) |
| Right insula                                   | 6.44<br>(0.85)  | 6.41<br>(0.91)  | 6.39<br>(0.82)  | 6.38<br>(0.94)  | 13.23 | 14.27 | 12.81 | 14.66 | 0.48<br>(0.63)  | 0.94<br>(0.36)  | 0.80<br>(0.43)  | -0.55<br>(3.93) | -0.68<br>(3.44) | -1.04<br>(5.05)  | 2.92<br>(2.61)  | 2.90<br>(1.88)   | 4.18<br>(2.88)  | 0.96 | 0.96 | 0.94 | 0.96 (0.91-0.98) | 0.96 (0.91-0.98) | 0.94 (0.86-0.97) |
| <b>Local cortical surface (cm<sup>2</sup>)</b> |                 |                 |                 |                 |       |       |       |       |                 |                 |                 |                 |                 |                  |                 |                  |                 |      |      |      |                  |                  |                  |
| Left banks superior temporal sulcus            | 7.92<br>(1.20)  | 7.94<br>(1.11)  | 7.98<br>(1.13)  | 7.94<br>(1.16)  | 15.09 | 13.94 | 14.13 | 14.59 | -0.21<br>(0.83) | -1.06<br>(0.30) | -0.22<br>(0.83) | 0.38<br>(4.89)  | 0.89<br>(3.79)  | 0.25<br>(4.27)   | 3.39<br>(3.47)  | 2.60<br>(2.85)   | 2.82<br>(3.17)  | 0.95 | 0.97 | 0.96 | 0.95 (0.88-0.98) | 0.97 (0.94-0.99) | 0.96 (0.92-0.99) |
| Left caudal anterior cingulate cortex          | 5.70<br>(1.54)  | 5.84<br>(1.34)  | 5.80<br>(1.29)  | 5.86<br>(1.39)  | 26.93 | 23.00 | 22.33 | 23.63 | -1.16<br>(0.26) | -0.78<br>(0.44) | -1.29<br>(0.21) | 3.84<br>(15.15) | 3.29<br>(14.94) | 4.13<br>(15.30)  | 8.63<br>(12.92) | 7.52<br>(13.24)  | 7.89<br>(13.67) | 0.93 | 0.94 | 0.93 | 0.92 (0.83-0.97) | 0.93 (0.83-0.97) | 0.92 (0.82-0.97) |
| Left caudal middle frontal gyrus               | 19.09<br>(3.23) | 19.04<br>(3.34) | 19.07<br>(3.23) | 19.06<br>(3.30) | 16.93 | 17.56 | 16.93 | 17.34 | 0.57<br>(0.58)  | 0.20<br>(0.84)  | 0.38<br>(0.71)  | -0.35<br>(2.06) | -0.08<br>(1.92) | -0.23<br>(2.27)  | 1.55<br>(1.36)  | 1.38<br>(1.30)   | 1.84<br>(1.29)  | 0.99 | 0.99 | 0.99 | 0.99 (0.99-1.00) | 0.99 (0.99-1.00) | 0.99 (0.98-1.00) |
| Left cuneus                                    | 14.22<br>(1.96) | 14.27<br>(2.06) | 14.29<br>(2.01) | 14.25<br>(2.01) | 13.77 | 14.43 | 14.05 | 14.12 | -0.58<br>(0.56) | -0.76<br>(0.46) | -0.52<br>(0.61) | 0.28<br>(2.84)  | 0.44<br>(3.04)  | 0.18<br>(1.98)   | 2.40<br>(1.46)  | 2.26<br>(2.02)   | 1.66<br>(1.04)  | 0.98 | 0.98 | 0.99 | 0.98 (0.95-0.99) | 0.98 (0.95-0.99) | 0.99 (0.98-1.00) |
| Left entorhinal cortex                         | 3.76<br>(0.90)  | 3.85<br>(0.89)  | 4.09<br>(0.83)  | 3.92<br>(0.74)  | 23.94 | 23.19 | 20.38 | 19.00 | -0.89<br>(0.38) | -2.54<br>(0.02) | -1.80<br>(0.09) | 2.75<br>(12.94) | 9.07<br>(16.46) | 5.13<br>(12.25)  | 10.29<br>(8.04) | 11.57<br>(14.73) | 7.91<br>(10.59) | 0.86 | 0.75 | 0.89 | 0.86 (0.70-0.94) | 0.71 (0.37-0.87) | 0.86 (0.69-0.94) |
| Left fusiform gyrus                            | 27.11<br>(4.38) | 27.60<br>(4.34) | 27.08<br>(4.30) | 27.36<br>(4.27) | 16.16 | 15.73 | 15.88 | 15.60 | -3.00<br>(0.01) | 0.31<br>(0.76)  | -1.84<br>(0.08) | 1.86<br>(3.16)  | -0.08<br>(2.02) | 1.00<br>(2.44)   | 2.65<br>(2.49)  | 1.66<br>(1.09)   | 1.94<br>(1.75)  | 0.99 | 0.99 | 0.99 | 0.98 (0.93-0.99) | 0.99 (0.98-1.00) | 0.99 (0.97-1.00) |
| Left inferior parietal cortex                  | 36.43<br>(6.86) | 36.40<br>(6.99) | 36.41<br>(6.99) | 36.74<br>(6.74) | 18.83 | 19.19 | 19.19 | 18.34 | 0.23<br>(0.82)  | 0.16<br>(0.87)  | -1.79<br>(0.09) | -0.15<br>(1.84) | -0.12<br>(1.75) | 0.94<br>(2.38)   | 1.44<br>(1.10)  | 1.43<br>(0.97)   | 2.01<br>(1.53)  | 1.00 | 1.00 | 0.99 | 1.00 (0.99-1.00) | 1.00 (0.99-1.00) | 0.99 (0.98-1.00) |
| Left inferior temporal gyrus                   | 27.05<br>(4.21) | 27.59<br>(4.15) | 27.33<br>(4.21) | 27.42<br>(4.00) | 15.58 | 15.04 | 15.40 | 14.57 | -3.17<br>(0.00) | -2.20<br>(0.04) | -2.71<br>(0.01) | 2.13<br>(3.43)  | 1.09<br>(2.24)  | 1.56<br>(2.59)   | 2.72<br>(2.96)  | 1.95<br>(1.52)   | 2.30<br>(1.94)  | 0.98 | 0.99 | 0.99 | 0.97 (0.90-0.99) | 0.99 (0.97-1.00) | 0.98 (0.95-0.99) |
| Left isthmus cingulate cortex                  | 9.65<br>(1.85)  | 9.77<br>(1.80)  | 9.76<br>(1.79)  | 9.87<br>(1.76)  | 19.21 | 18.42 | 18.30 | 17.79 | -1.09<br>(0.29) | -1.26<br>(0.22) | -2.12<br>(0.05) | 1.35<br>(5.31)  | 1.27<br>(4.38)  | 2.48<br>(5.23)   | 3.95<br>(3.71)  | 3.30<br>(3.07)   | 3.91<br>(4.22)  | 0.96 | 0.98 | 0.97 | 0.96 (0.91-0.98) | 0.98 (0.94-0.99) | 0.96 (0.89-0.98) |
| Left lateral occipital cortex                  | 46.43<br>(6.52) | 46.89<br>(6.76) | 46.73<br>(6.24) | 46.73<br>(6.53) | 14.03 | 14.41 | 13.36 | 13.97 | -3.05<br>(0.01) | -1.79<br>(0.09) | -1.98<br>(0.06) | 0.91<br>(1.43)  | 0.72<br>(1.63)  | 0.63<br>(1.47)   | 1.39<br>(0.96)  | 1.52<br>(0.89)   | 1.31<br>(0.87)  | 1.00 | 0.99 | 0.99 | 0.99 (0.97-1.00) | 0.99 (0.98-1.00) | 0.99 (0.98-1.00) |
| Left lateral orbitofrontal cortex              | 24.31<br>(3.43) | 24.51<br>(3.40) | 24.23<br>(3.51) | 24.43<br>(3.41) | 14.13 | 13.87 | 14.47 | 13.96 | -2.02<br>(0.06) | 0.81<br>(0.43)  | -1.63<br>(0.12) | 0.86<br>(1.94)  | -0.36<br>(1.80) | 0.52<br>(1.43)   | 1.49<br>(1.49)  | 1.35<br>(1.22)   | 1.18<br>(0.94)  | 0.99 | 0.99 | 0.99 | 0.99 (0.97-1.00) | 0.99 (0.98-1.00) | 0.99 (0.99-1.00) |
| Left lingual gyrus                             | 29.55<br>(4.40) | 29.50<br>(4.68) | 29.60<br>(4.56) | 29.49<br>(4.36) | 14.88 | 15.86 | 15.40 | 14.80 | 0.36<br>(0.72)  | -0.40<br>(0.69) | 0.50<br>(0.62)  | -0.31<br>(2.22) | 0.08<br>(1.75)  | -0.18<br>(1.83)  | 1.94<br>(1.05)  | 1.36<br>(1.06)   | 1.48<br>(1.06)  | 0.99 | 0.99 | 0.99 | 0.99 (0.97-1.00) | 0.99 (0.98-1.00) | 0.99 (0.98-1.00) |
| Left medial orbitofrontal cortex               | 18.44<br>(2.73) | 18.51<br>(2.63) | 18.54<br>(2.33) | 18.38<br>(2.56) | 14.78 | 14.22 | 12.54 | 13.94 | -0.21<br>(0.84) | -0.49<br>(0.63) | 0.20<br>(0.84)  | 0.42<br>(8.43)  | 0.82<br>(5.03)  | -0.21<br>(7.84)  | 6.19<br>(5.57)  | 4.18<br>(2.78)   | 5.50<br>(5.47)  | 0.84 | 0.94 | 0.86 | 0.84 (0.66-0.93) | 0.93 (0.85-0.97) | 0.87 (0.71-0.94) |
| Left middle temporal gyrus                     | 26.16<br>(4.24) | 26.38<br>(4.29) | 25.95<br>(4.23) | 26.22<br>(4.28) | 16.21 | 16.28 | 16.29 | 16.33 | -1.90<br>(0.07) | 1.68<br>(0.11)  | -0.53<br>(0.60) | 0.86<br>(2.24)  | -0.79<br>(2.16) | 0.22<br>(2.10)   | 1.94<br>(1.35)  | 1.88<br>(1.26)   | 1.66<br>(1.26)  | 0.99 | 0.99 | 0.99 | 0.99 (0.98-1.00) | 0.99 (0.98-1.00) | 0.99 (0.98-1.00) |
| Left parahippocampal gyrus                     | 5.79<br>(0.75)  | 5.88<br>(0.72)  | 5.84<br>(0.63)  | 5.91<br>(0.78)  | 12.96 | 12.18 | 10.75 | 13.19 | -1.54<br>(0.14) | -1.02<br>(0.32) | -2.40<br>(0.03) | 1.60<br>(4.87)  | 1.13<br>(4.43)  | 2.06<br>(3.89)   | 3.81<br>(3.34)  | 3.21<br>(3.18)   | 3.13<br>(3.04)  | 0.93 | 0.96 | 0.95 | 0.93 (0.84-0.97) | 0.94 (0.87-0.98) | 0.94 (0.85-0.98) |
| Left paracentral lobule                        | 12.51<br>(1.65) | 12.44<br>(1.64) | 12.50<br>(1.57) | 12.49<br>(1.62) | 13.16 | 13.18 | 12.53 | 12.96 | 1.23<br>(0.23)  | 0.33<br>(0.75)  | 0.65<br>(0.52)  | -0.57<br>(2.15) | -0.05<br>(1.81) | -0.20<br>(1.60)  | 1.97<br>(0.96)  | 1.62<br>(0.74)   | 1.24<br>(1.00)  | 0.99 | 0.99 | 0.99 | 0.99 (0.97-0.99) | 0.99 (0.98-1.00) | 0.99 (0.98-1.00) |
| Left pars opercularis                          | 13.78<br>(2.05) | 13.99<br>(2.09) | 13.88<br>(2.21) | 13.82<br>(2.02) | 14.89 | 14.94 | 15.91 | 14.64 | -2.35<br>(0.03) | -0.88<br>(0.39) | -0.56<br>(0.58) | 1.46<br>(2.77)  | 0.50<br>(3.47)  | 0.29<br>(2.12)   | 2.45<br>(1.90)  | 2.51<br>(2.38)   | 1.78<br>(1.13)  | 0.98 | 0.98 | 0.99 | 0.98 (0.93-0.99) | 0.97 (0.94-0.99) | 0.99 (0.97-1.00) |
| Left pars orbitalis                            | 6.31<br>(1.18)  | 6.30<br>(1.24)  | 6.30<br>(1.20)  | 6.30<br>(1.23)  | 18.68 | 19.70 | 18.99 | 19.59 | 0.35<br>(0.73)  | 0.26<br>(0.80)  | 0.39<br>(0.70)  | -0.46<br>(3.84) | -0.26<br>(3.64) | -0.40<br>(3.24)  | 3.01<br>(2.34)  | 2.63<br>(2.46)   | 2.30<br>(2.27)  | 0.98 | 0.98 | 0.99 | 0.98 (0.96-0.99) | 0.98 (0.96-0.99) | 0.99 (0.97-1.00) |
| Left pars triangularis                         | 12.07<br>(1.70) | 12.07<br>(1.80) | 12.13<br>(1.83) | 12.11<br>(1.74) | 14.07 | 14.92 | 15.13 | 14.38 | -0.02<br>(0.98) | -0.59<br>(0.56) | -0.63<br>(0.54) | -0.10<br>(2.53) | 0.32<br>(3.54)  | 0.32<br>(2.92)   | 2.13<br>(1.28)  | 2.87<br>(2.00)   | 2.28<br>(1.78)  | 0.99 | 0.97 | 0.98 | 0.99 (0.96-0.99) | 0.97 (0.93-0.99) | 0.98 (0.96-0.99) |
| Left pericalcarine cortex                      | 13.47<br>(2.36) |                 |                 |                 |       |       |       |       |                 |                 |                 |                 |                 |                  |                 |                  |                 |      |      |      |                  |                  |                  |

|                                        |                  |                  |                  |                  |       |       |       |       |                 |                 |                 |                 |                 |                 |                |                |                |      |      |      |                  |                  |                  |
|----------------------------------------|------------------|------------------|------------------|------------------|-------|-------|-------|-------|-----------------|-----------------|-----------------|-----------------|-----------------|-----------------|----------------|----------------|----------------|------|------|------|------------------|------------------|------------------|
| Left precentral gyrus                  | 45-54<br>(6.12)  | 45.41<br>(6.33)  | 45-46<br>(6.43)  | 45-51<br>(6.39)  | 13.44 | 13.93 | 14.14 | 14.03 | 1.07<br>(0.30)  | 0.57<br>(0.57)  | 0.22<br>(0.82)  | -0.35<br>(1.35) | -0.26<br>(1.47) | -0.14<br>(1.40) | 0.98<br>(0.98) | 1.07<br>(1.02) | 1.09<br>(0.86) | 1.00 | 1.00 | 1.00 | 1.00 (0.99-1.00) | 1.00 (0.99-1.00) | 1.00 (0.99-1.00) |
| Left precuneus                         | 33-59<br>(5.27)  | 33.60<br>(5.27)  | 33-55<br>(5.15)  | 33-54<br>(5.24)  | 15.70 | 15.68 | 15-36 | 15.62 | -0.11<br>(0.91) | 0.37<br>(0.71)  | 0.50<br>(0.62)  | 0.04<br>(1.38)  | -0.06<br>(1.53) | -0.12<br>(1.34) | 1.12<br>(0.76) | 1.18<br>(0.94) | 1.13<br>(0.70) | 1.00 | 1.00 | 1.00 | 1.00 (0.99-1.00) | 1.00 (0.99-1.00) | 1.00 (0.99-1.00) |
| Left rostral anterior cingulate cortex | 7.89<br>(2.22)   | 7.84<br>(1.91)   | 7.90<br>(2.10)   | 8.01<br>(2.28)   | 28.14 | 24.40 | 26.56 | 28.45 | 0.45<br>(0.66)  | -0.23<br>(0.82) | -0.95<br>(0.35) | 0.33<br>(6.11)  | 0.78<br>(5.40)  | 1.88<br>(7.50)  | 4.22<br>(4.34) | 3.90<br>(3.73) | 5.36<br>(5.47) | 0.98 | 0.99 | 0.97 | 0.97 (0.93-0.99) | 0.99 (0.97-0.99) | 0.97 (0.92-0.99) |
| Left rostral middle frontal gyrus      | 49.62<br>(9.21)  | 49.95<br>(9.06)  | 49.74<br>(9.06)  | 50.14<br>(8.91)  | 18.57 | 18.14 | 18.22 | 17.78 | -2.28<br>(0.03) | -0.99<br>(0.33) | -3.09<br>(0.01) | 0.73<br>(1.41)  | 0.30<br>(1.18)  | 1.20<br>(1.81)  | 1.23<br>(0.98) | 0.91<br>(0.78) | 1.59<br>(1.45) | 1.00 | 1.00 | 1.00 | 1.00 (0.99-1.00) | 1.00 (1.00-1.00) | 0.99 (0.98-1.00) |
| Left superior frontal gyrus            | 64.77<br>(11.18) | 65.08<br>(11.41) | 64.94<br>(11.23) | 65.06<br>(11.14) | 17.26 | 17.53 | 17.29 | 17.12 | -2.20<br>(0.04) | -1.36<br>(0.19) | -2.93<br>(0.01) | 0.43<br>(0.92)  | 0.26<br>(0.97)  | 0.46<br>(0.76)  | 0.83<br>(0.56) | 0.77<br>(0.62) | 0.67<br>(0.58) | 1.00 | 1.00 | 1.00 | 1.00 (0.99-1.00) | 1.00 (1.00-1.00) | 1.00 (1.00-1.00) |
| Left superior parietal cortex          | 48.82<br>(8.05)  | 48.72<br>(7.95)  | 48.82<br>(7.97)  | 48.86<br>(7.91)  | 16.48 | 16.33 | 16.32 | 16.19 | 0.96<br>(0.35)  | 0.01<br>(0.99)  | -0.32<br>(0.75) | -0.18<br>(1.01) | 0.02<br>(1.07)  | 0.14<br>(1.48)  | 0.78<br>(0.64) | 0.85<br>(0.62) | 1.08<br>(0.99) | 1.00 | 1.00 | 1.00 | 1.00 (1.00-1.00) | 1.00 (1.00-1.00) | 1.00 (0.99-1.00) |
| Left superior temporal gyrus           | 36.03<br>(3.89)  | 36.15<br>(4.05)  | 35-93<br>(4.01)  | 36.19<br>(4.00)  | 10.78 | 11.20 | 11.17 | 11.06 | -0.90<br>(0.38) | 0.86<br>(0.40)  | -1.46<br>(0.16) | 0.29<br>(1.87)  | -0.32<br>(1.50) | 0.41<br>(1.47)  | 1.34<br>(1.30) | 1.12<br>(1.03) | 1.18<br>(0.93) | 0.99 | 0.99 | 0.99 | 0.99 (0.97-0.99) | 0.99 (0.98-1.00) | 0.99 (0.98-1.00) |
| Left supramarginal gyrus               | 35.50<br>(5.38)  | 35-55<br>(5.46)  | 35-58<br>(5.49)  | 35-74<br>(5.47)  | 15.15 | 15.37 | 15-43 | 15.31 | -0.36<br>(0.72) | -0.60<br>(0.55) | -1.86<br>(0.08) | 0.12<br>(1.85)  | 0.19<br>(1.88)  | 0.65<br>(1.70)  | 1.39<br>(1.18) | 1.46<br>(1.17) | 1.37<br>(1.16) | 0.99 | 0.99 | 0.99 | 0.99 (0.98-1.00) | 0.99 (0.98-1.00) | 0.99 (0.98-1.00) |
| Left frontal pole                      | 2.44<br>(0.31)   | 2.40<br>(0.29)   | 2.44<br>(0.27)   | 2.39<br>(0.29)   | 12.61 | 11.95 | 11.08 | 12.29 | 0.87<br>(0.40)  | -0.14<br>(0.89) | 1.53<br>(0.14)  | -1.44<br>(8.41) | 0.43<br>(8.40)  | -2.01<br>(6.16) | 7.04<br>(4.58) | 7.02<br>(4.37) | 5.29<br>(3.59) | 0.77 | 0.76 | 0.88 | 0.77 (0.53-0.90) | 0.76 (0.50-0.89) | 0.87 (0.71-0.94) |
| Left temporal pole                     | 4.37<br>(0.63)   | 4.30<br>(0.58)   | 4.40<br>(0.73)   | 4.36<br>(0.65)   | 14.43 | 13.40 | 16.61 | 14.93 | 1.04<br>(0.31)  | -0.49<br>(0.63) | 0.22<br>(0.83)  | -1.40<br>(6.99) | 0.39<br>(5.99)  | -0.32<br>(6.41) | 5.88<br>(3.83) | 4.83<br>(3.40) | 4.87<br>(4.05) | 0.88 | 0.93 | 0.91 | 0.87 (0.72-0.95) | 0.93 (0.83-0.97) | 0.91 (0.80-0.96) |
| Left transverse temporal gyrus         | 4.26<br>(0.56)   | 4.28<br>(0.61)   | 4.29<br>(0.54)   | 4.26<br>(0.54)   | 13.16 | 14.28 | 12.50 | 12.73 | -0.78<br>(0.45) | -0.72<br>(0.48) | -0.03<br>(0.97) | 0.49<br>(4.16)  | 0.79<br>(4.53)  | 0.10<br>(4.24)  | 3.22<br>(2.58) | 3.75<br>(2.54) | 3.22<br>(2.66) | 0.96 | 0.94 | 0.94 | 0.96 (0.91-0.98) | 0.94 (0.85-0.97) | 0.94 (0.87-0.98) |
| Left insula                            | 23.49<br>(2.80)  | 23.57<br>(2.78)  | 23.18<br>(2.56)  | 23.65<br>(2.82)  | 11.94 | 11.77 | 11.03 | 11.92 | -0.21<br>(0.84) | 1.18<br>(0.25)  | -0.47<br>(0.64) | 0.39<br>(7.47)  | -1.22<br>(5.17) | 0.70<br>(6.78)  | 5.58<br>(4.83) | 3.52<br>(3.92) | 4.96<br>(4.55) | 0.78 | 0.90 | 0.82 | 0.79 (0.55-0.91) | 0.89 (0.76-0.95) | 0.83 (0.63-0.93) |
| Right banks superior temporal sulcus   | 7.42<br>(1.30)   | 7.50<br>(1.51)   | 7.39<br>(1.15)   | 7.50<br>(1.36)   | 17.50 | 20.09 | 15.49 | 18.10 | -0.65<br>(0.52) | 0.52<br>(0.61)  | -0.84<br>(0.41) | 0.77<br>(5.60)  | -0.05<br>(3.84) | 1.07<br>(5.32)  | 3.94<br>(3.96) | 2.90<br>(2.44) | 3.62<br>(3.97) | 0.94 | 0.98 | 0.95 | 0.93 (0.84-0.97) | 0.98 (0.95-0.99) | 0.95 (0.88-0.98) |
| Right caudal anterior cingulate cortex | 6.37<br>(1.41)   | 6.47<br>(1.41)   | 6.40<br>(1.38)   | 6.39<br>(1.43)   | 22.06 | 21.84 | 21.58 | 22.36 | -1.39<br>(0.18) | -0.67<br>(0.51) | -0.20<br>(0.84) | 1.56<br>(5.45)  | 0.56<br>(3.24)  | 0.19<br>(5.38)  | 4.24<br>(3.67) | 2.40<br>(2.19) | 4.01<br>(3.48) | 0.97 | 0.99 | 0.97 | 0.97 (0.93-0.99) | 0.99 (0.97-1.00) | 0.97 (0.93-0.99) |
| Right caudal middle frontal gyrus      | 18.25<br>(3.33)  | 18.29<br>(3.40)  | 18.39<br>(3.35)  | 18.45<br>(3.48)  | 18.23 | 18.58 | 18.24 | 18.84 | -0.43<br>(0.67) | -1.53<br>(0.14) | -2.16<br>(0.04) | 0.15<br>(2.63)  | 0.76<br>(2.40)  | 1.00<br>(2.50)  | 2.12<br>(1.50) | 1.84<br>(1.68) | 1.93<br>(1.84) | 0.99 | 0.99 | 0.99 | 0.99 (0.98-1.00) | 0.99 (0.98-1.00) | 0.99 (0.97-1.00) |
| Right cuneus                           | 15.64<br>(2.34)  | 15.68<br>(2.32)  | 15.48<br>(2.08)  | 15.63<br>(2.32)  | 14.95 | 14.81 | 13.44 | 14.82 | -0.70<br>(0.49) | 1.25<br>(0.22)  | 0.07<br>(0.94)  | 0.25<br>(1.63)  | -0.86<br>(3.34) | -0.01<br>(2.55) | 1.24<br>(1.06) | 2.15<br>(2.66) | 2.05<br>(1.46) | 0.99 | 0.97 | 0.99 | 0.99 (0.99-1.00) | 0.96 (0.91-0.98) | 0.99 (0.97-0.99) |
| Right entorhinal cortex                | 3.48<br>(0.65)   | 3.48<br>(0.75)   | 3.45<br>(0.67)   | 3.54<br>(0.79)   | 18.76 | 21.54 | 19.50 | 22.28 | -0.02<br>(0.98) | 0.53<br>(0.60)  | -0.69<br>(0.50) | -0.41<br>(7.92) | -1.13<br>(9.67) | 1.17<br>(12.23) | 6.39<br>(4.49) | 7.33<br>(6.21) | 8.46<br>(8.72) | 0.94 | 0.89 | 0.83 | 0.93 (0.85-0.97) | 0.89 (0.77-0.95) | 0.82 (0.62-0.92) |
| Right fusiform gyrus                   | 26.51<br>(3.86)  | 26.73<br>(3.89)  | 26.67<br>(3.90)  | 26.73<br>(4.03)  | 14.57 | 14.56 | 14.61 | 15.07 | -2.26<br>(0.03) | -1.64<br>(0.12) | -1.70<br>(0.10) | 0.84<br>(1.71)  | 0.60<br>(1.79)  | 0.77<br>(2.26)  | 1.49<br>(1.15) | 1.51<br>(1.09) | 1.98<br>(1.28) | 0.99 | 0.99 | 0.99 | 0.99 (0.98-1.00) | 0.99 (0.98-1.00) | 0.99 (0.97-0.99) |
| Right inferior parietal cortex         | 43.73<br>(8.27)  | 43.93<br>(8.65)  | 43.73<br>(8.31)  | 44.30<br>(8.40)  | 18.91 | 19.70 | 18.99 | 18.97 | -0.77<br>(0.45) | -0.03<br>(0.98) | -3.19<br>(0.00) | 0.35<br>(2.41)  | -0.01<br>(1.60) | 1.28<br>(1.70)  | 1.62<br>(1.79) | 1.23<br>(0.98) | 1.54<br>(1.45) | 0.99 | 1.00 | 1.00 | 0.99 (0.98-1.00) | 1.00 (0.99-1.00) | 0.99 (0.97-1.00) |
| Right inferior temporal gyrus          | 26.40<br>(4.45)  | 26.43<br>(4.20)  | 26.68<br>(4.22)  | 26.54<br>(4.30)  | 16.84 | 15.88 | 15.82 | 16.21 | -0.15<br>(0.88) | -1.34<br>(0.20) | -0.64<br>(0.53) | 0.18<br>(3.33)  | 1.15<br>(3.59)  | 0.55<br>(3.62)  | 2.42<br>(2.24) | 2.66<br>(2.62) | 2.99<br>(2.01) | 0.98 | 0.98 | 0.97 | 0.98 (0.94-0.99) | 0.97 (0.94-0.99) | 0.97 (0.94-0.99) |
| Right isthmus cingulate cortex         | 8.54<br>(1.70)   | 8.54<br>(1.70)   | 8.47<br>(1.93)   | 8.56<br>(1.88)   | 19.94 | 19.95 | 22.76 | 21.97 | 0.04<br>(0.97)  | 0.75<br>(0.46)  | -0.21<br>(0.84) | -0.07<br>(4.18) | -1.47<br>(6.42) | -0.25<br>(5.75) | 3.14<br>(2.67) | 3.47<br>(5.56) | 3.97<br>(4.08) | 0.98 | 0.98 | 0.97 | 0.98 (0.96-0.99) | 0.97 (0.94-0.99) | 0.97 (0.93-0.99) |
| Right lateral occipital cortex         | 45.69<br>(5.48)  | 45.80<br>(5.52)  | 45.84<br>(5.39)  | 46.03<br>(5.62)  | 12.00 | 12.05 | 11.75 | 12.21 | -0.53<br>(0.60) | -1.15<br>(0.26) | -2.84<br>(0.01) | 0.22<br>(1.89)  | 0.35<br>(1.37)  | 0.71<br>(1.21)  | 1.38<br>(1.28) | 1.00<br>(0.97) | 1.05<br>(0.92) | 0.99 | 0.99 | 1.00 | 0.99 (0.97-0.99) | 0.99 (0.99-1.00) | 0.99 (0.98-1.00) |
| Right lateral orbitofrontal cortex     | 24.43<br>(3.24)  | 24.80<br>(3.30)  | 24.71<br>(3.36)  | 24.90<br>(3.35)  | 13.25 | 13.30 | 13.60 | 13.47 | -1.62<br>(0.12) | -1.11<br>(0.28) | -1.26<br>(0.22) | 1.50<br>(4.19)  | 1.08<br>(4.47)  | 1.89<br>(7.32)  | 3.31<br>(2.92) | 3.25<br>(3.18) | 5.62<br>(4.92) | 0.95 | 0.94 | 0.86 | 0.94 (0.86-0.98) | 0.94 (0.86-0.97) | 0.86 (0.69-0.94) |
| Right lingual gyrus                    | 30.77<br>(4.81)  | 30.74<br>(4.77)  | 30.85<br>(4.75)  | 30.82<br>(5.05)  | 15.63 | 15.52 | 15.39 | 16.37 | 0.21<br>(0.83)  | -0.58<br>(0.57) | -0.40<br>(0.69) | -0.10<br>(2.16) | 0.27<br>(1.88)  | 0.07<br>(1.86)  | 1.58<br>(1.43) | 1.45<br>(1.19) | 1.22<br>(1.39) | 0.99 | 0.99 | 0.99 | 0.99 (0.97-1.00) | 0.99 (0.98-1.00) | 0.99 (0.98-1.00) |
| Right medial orbitofrontal cortex      | 18.47<br>(2.35)  | 18.47<br>(2.30)  | 18.54<br>(2.61)  | 18.39<br>(2.30)  | 12.73 | 12.45 | 14.07 | 12.52 | 0.05<br>(0.96)  | -0.38<br>(0.70) | 0.47<br>(0.64)  | 0.00<br>(4.27)  | 0.19<br>(4.02)  | -0.43<br>(4.59) | 3.54<br>(2.27) | 3.01<br>(2.59) | 3.56<br>(2.82) | 0.94 | 0.95 | 0.93 | 0.94 (0.87-0.98) | 0.95 (0.89-0.98) | 0.94 (0.85-0.97) |
| Right middle temporal gyrus            | 29.67<br>(4.83)  | 29.81<br>(4.88)  | 29.82<br>(4.92)  | 29.78<br>(4.82)  | 16.28 | 16.37 | 16.49 | 16.20 | -1.84<br>(0.08) | -1.45<br>(0.16) | -1.09<br>(0.29) | 0.46<br>(1.27)  | 0.46<br>(1.71)  | 0.35<br>(1.47)  | 1.12<br>(0.72) | 1.40<br>(1.05) | 1.11<br>(1.00) | 1.00 | 1.00 | 1.00 | 1.00 (0.99-1.00) | 0.99 (0.99-1.00) | 1.00 (0.99-1.00) |
| Right parahippocampal gyrus            | 5.70<br>(0.79)   | 5.76<br>(0.78)   | 5.76<br>(0.71)   | 5.78<br>(0.82)   | 13.88 | 13.46 | 12.39 | 14.27 | -0.77<br>(0.45) | -1.19<br>(0.25) | -1.56<br>(0.13) | 1.16<br>(6.62)  | 1.24<br>(4.24)  | 1.31<br>(4.72)  | 4.93<br>(4.45) | 3.40<br>(2.73) | 3.74<br>(3.07) | 0.88 | 0.96 | 0.96 | 0.88 (0.74-0.95) | 0.95 (0.89-0.98) | 0.95 (0.89-0.98) |
| Right paracentral lobule               | 14.40<br>(2.42)  | 14.44<br>(2.38)  | 14.38<br>(2.37)  | 14.51<br>(2.40)  | 16.80 | 16.46 | 16.45 | 16.57 | -0.58<br>(0.57) | 0.35<br>(0.73)  | -2.16<br>(0.04) | 0.31<br>(2.24)  | -0.12<br>(2.21) | 0.77<br>(1.65)  | 1.76<br>(1.37) | 1.82<br>(1.20) | 1.52<br>(0.95) | 0.99 | 0.99 | 1.00 | 0.99 (0.98-1.00) | 0.99 (0.98-1.00) | 0.99 (0.99-1.00) |
| Right pars opercularis                 | 11.97<br>(2.10)  | 12.07<br>(2.44)  | 11.94<br>(2.08)  | 12.00<br>(2.25)  | 17.51 | 20.20 | 17.42 | 18.79 | -0.95<br>(0.36) | 0.46<br>(0.65)  | -0.34<br>(0.74) | 0.44<br>(3.81)  | -0.28<br>(2.89) | 0.02<br>(3.04)  | 2.81<br>(2.54) | 2.22<br>(1.81) | 2.47<br>(1.69) | 0.99 | 0.99 | 0.99 | 0.97 (0.94-0.99) | 0.99 (0.97-1.00) | 0.99 (0.97-0.99) |
| Right pars orbitalis                   | 7.66<br>(1.28)   | 7.59<br>(1.27)   | 7.65<br>(1.28)   | 7.62<br>(1.23)   | 16.67 | 16.72 | 16.67 | 16.17 | 1.47<br>(0.16)  | 0.07<br>(0.94)  | 0.73<br>(0.47)  | -0.82<br>(2.63) | -0.05<br>(2.99) | -0.37<br>(2.88) | 2.08<br>(1.75) | 2.49<br>(1.56) | 2.48<br>(1.41) | 0.99 | 0.98 | 0.98 | 0.99 (0.97-0.99) | 0.98 (0.96-0.99) | 0.98 (0.96-0.99) |
| Right pars triangularis                | 13.45<br>(2.39)  | 13.52<br>(2.54)  | 13.47<br>(2.44)  | 13.45<br>(2.48)  | 17.77 | 18.78 | 18.11 | 18.40 | -1.15<br>(0.26) | -0.39<br>(0.70) | -0.11<br>(0.91) | 0.34<br>(2.25)  | 0.12<br>(2.29)  | -0.05<br>(2.20) | 1.88<br>(1.22) | 1.75<br>(1.42) | 1.81<br>(1.19) | 0.99 | 0.99 | 0.99 | 0.99 (0.98-1.00) | 0.99 (0.98-1.00) | 0.99 (0.98-1.00) |
| Right pericalcarine cortex             | 14.88<br>(2.77)  | 14.92<br>(2.78)  | 14.88<br>(2.80)  | 14.90<br>(2.78)  | 18.64 | 18.65 | 18.85 | 18.65 | -0.38<br>(0.71) | 0.04<br>(0.97)  | -0.23<br>(0.82) | 0.23<br>(3.17)  | -0.05<br>(3.25) | 0.14<br>(2.52)  | 2.36<br>(2.07) | 2.42<br>(2.10) | 1.97<br>(1.53) | 0.99 | 0.98 | 0.99 | 0.99 (0.97-0.99) | 0.98 (0.96-0.99) | 0.99 (0.98-1.00) |
| Right postcentral gyrus                | 36.71<br>(5.02)  | 36.84<br>(5.09)  | 36.73<br>(5.02)  | 36.83<br>(4.98)  | 13.67 | 13.82 | 13.66 | 13.53 | -1.24<br>(0.23) | -0.15<br>(0.89) | -1.56<br>(0.13) | 0.33<br>(1.31)  | 0.04<br>(1.37)  | 0.33<br>(0.95)  | 1.08<br>(0.78) | 1.06<br>(0.83) | 0.73<br>(0.69) | 1.00 | 0.99 | 1.00 | 1.00 (0.99-1.00) | 1.00 (0.99-1.00) | 1.00 (0.99-1.00) |
| Right posterior cingulate cortex       | 10.11<br>(2.71)  | 10.14<br>(2.69)  | 10.10<br>(2.74)  | 10.15<br>(2.81)  | 26.79 | 26.57 | 27.11 | 27.66 | -0.21<br>(0.84) | 0.05<br>(0.96)  | -0.18<br>(0.86) | 0.34<br>(7.73)  | -0.33<br>(6.54) | 0.12<br>(10.68) | 5.20<br>(5.61) | 4.17<br>(4.96) | 6.01<br>(8.72) | 0.97 | 0.98 | 0.94 | 0.97 (0.93-0.99) | 0.98 (0.96-0.99) | 0.94 (0.85-0.97) |
| Right precentral gyrus                 | 45-39<br>(7.27)  | 45-38<br>(7.37)  | 45-26<br>(7.20)  | 45-27<br>(7.49)  | 16.01 | 16.23 | 15.91 | 16.54 | 0.14<br>(0.89)  | 1.25<br>(0.22)  | 1.29<br>(0.21)  | -0.06<br>(1.08) | -0.28<br>(1.08) | -0.35<br>(1.02) | 0.84<br>(0.65) | 0.93<br>(0.58) | 0.81<br>(0.69) | 1.00 | 1.00 | 1.00 | 1.00 (0.99-1.00) | 1.00 (0.99-1.00) | 1.00 (1.00-1.00) |
| Right precuneus                        | 35-57<br>(5.40)  | 35-44<br>(5.29)  | 35-46<br>(5.40)  | 35-54<br>(       |       |       |       |       |                 |                 |                 |                 |                 |                 |                |                |                |      |      |      |                  |                  |                  |

|                                        |                  |                  |                  |                  |       |       |       |       |                 |                 |                 |                 |                 |                 |                |                |                |      |      |      |                  |                  |                  |
|----------------------------------------|------------------|------------------|------------------|------------------|-------|-------|-------|-------|-----------------|-----------------|-----------------|-----------------|-----------------|-----------------|----------------|----------------|----------------|------|------|------|------------------|------------------|------------------|
| Right superior frontal gyrus           | 64.26<br>(11.91) | 64.36<br>(11.82) | 64.56<br>(11.84) | 64.65<br>(11.80) | 18.54 | 18.36 | 18.35 | 18.25 | -0.84<br>(0.41) | -2.37<br>(0.03) | -2.78<br>(0.01) | 0.18<br>(0.91)  | 0.49<br>(0.99)  | 0.64<br>(1.10)  | 0.69<br>(0.61) | 0.88<br>(0.66) | 1.00<br>(0.78) | 1.00 | 1.00 | 1.00 | 1.00 (1.00-1.00) | 1.00 (1.00-1.00) | 1.00 (0.99-1.00) |
| Right superior parietal cortex         | 47.96<br>(7.89)  | 47.87<br>(7.90)  | 48.06<br>(7.77)  | 48.29<br>(7.75)  | 16.44 | 16.51 | 16.16 | 16.04 | 1.10<br>(0.29)  | -0.81<br>(0.43) | -2.81<br>(0.01) | -0.20<br>(0.83) | 0.26<br>(1.29)  | 0.74<br>(1.24)  | 0.71<br>(0.45) | 1.08<br>(0.71) | 1.14<br>(0.87) | 1.00 | 1.00 | 1.00 | 1.00 (1.00-1.00) | 1.00 (0.99-1.00) | 1.00 (0.99-1.00) |
| Right superior temporal gyrus          | 33.81<br>(4.25)  | 33.76<br>(4.33)  | 33.93<br>(4.39)  | 33.68<br>(4.21)  | 12.58 | 12.82 | 12.94 | 12.51 | 0.35<br>(0.73)  | -0.67<br>(0.51) | 1.20<br>(0.24)  | -0.19<br>(2.01) | 0.31<br>(2.18)  | -0.38<br>(1.52) | 1.49<br>(1.33) | 1.45<br>(1.64) | 1.26<br>(0.89) | 0.99 | 0.98 | 0.99 | 0.99 (0.97-0.99) | 0.98 (0.96-0.99) | 0.99 (0.98-1.00) |
| Right supramarginal gyrus              | 32.22<br>(4.87)  | 32.31<br>(4.98)  | 32.29<br>(4.91)  | 32.29<br>(4.86)  | 15.13 | 15.40 | 15.22 | 15.04 | -0.92<br>(0.37) | -0.80<br>(0.43) | -0.86<br>(0.40) | 0.22<br>(1.30)  | 0.20<br>(1.30)  | 0.23<br>(1.14)  | 1.06<br>(0.75) | 1.02<br>(0.81) | 0.88<br>(0.73) | 1.00 | 1.00 | 1.00 | 1.00 (0.99-1.00) | 1.00 (0.99-1.00) | 1.00 (0.99-1.00) |
| Right frontal pole                     | 2.89<br>(0.31)   | 2.88<br>(0.31)   | 2.96<br>(0.31)   | 2.87<br>(0.30)   | 10.70 | 10.83 | 10.52 | 10.59 | 0.26<br>(0.80)  | -1.84<br>(0.08) | 0.81<br>(0.43)  | -0.33<br>(5.59) | 2.38<br>(6.02)  | -0.90<br>(5.52) | 4.60<br>(3.02) | 5.60<br>(3.06) | 4.31<br>(3.44) | 0.87 | 0.84 | 0.88 | 0.88 (0.73-0.95) | 0.82 (0.62-0.92) | 0.88 (0.73-0.95) |
| Right temporal pole                    | 4.38<br>(0.82)   | 4.28<br>(0.79)   | 4.36<br>(0.80)   | 4.32<br>(0.81)   | 18.82 | 18.47 | 18.33 | 18.65 | 1.85<br>(0.08)  | 0.25<br>(0.80)  | 0.90<br>(0.38)  | -2.17<br>(6.35) | -0.31<br>(7.11) | -1.29<br>(7.01) | 4.53<br>(4.87) | 5.65<br>(4.15) | 5.47<br>(4.42) | 0.96 | 0.93 | 0.94 | 0.95 (0.88-0.98) | 0.93 (0.84-0.97) | 0.94 (0.87-0.97) |
| Right transverse temporal gyrus        | 3.00<br>(0.42)   | 2.98<br>(0.37)   | 2.99<br>(0.41)   | 3.01<br>(0.42)   | 13.91 | 12.35 | 13.85 | 13.86 | 0.47<br>(0.64)  | 0.30<br>(0.77)  | -0.54<br>(0.59) | -0.28<br>(4.75) | -0.29<br>(4.30) | 0.46<br>(3.92)  | 3.80<br>(2.75) | 3.45<br>(2.48) | 3.12<br>(2.31) | 0.94 | 0.95 | 0.96 | 0.94 (0.86-0.97) | 0.95 (0.89-0.98) | 0.96 (0.91-0.98) |
| Right insula                           | 24.16<br>(2.88)  | 23.91<br>(3.62)  | 24.08<br>(2.99)  | 23.53<br>(3.67)  | 11.93 | 15.13 | 12.40 | 15.59 | 0.70<br>(0.49)  | 0.23<br>(0.82)  | 1.73<br>(0.10)  | -1.47<br>(6.93) | -0.38<br>(6.80) | -3.13<br>(7.67) | 5.67<br>(4.08) | 5.55<br>(3.76) | 6.23<br>(5.33) | 0.89 | 0.84 | 0.89 | 0.87 (0.72-0.94) | 0.84 (0.66-0.93) | 0.86 (0.68-0.94) |
| <b>Local cortical thickness (mm)</b>   |                  |                  |                  |                  |       |       |       |       |                 |                 |                 |                 |                 |                 |                |                |                |      |      |      |                  |                  |                  |
| Left banks superior temporal sulcus    | 2.32<br>(0.16)   | 2.32<br>(0.17)   | 2.33<br>(0.15)   | 2.32<br>(0.16)   | 6.86  | 7.44  | 6.61  | 7.08  | 0.59<br>(0.56)  | -0.48<br>(0.64) | 0.88<br>(0.39)  | -0.30<br>(2.05) | 0.17<br>(1.50)  | -0.28<br>(1.43) | 1.58<br>(1.30) | 1.00<br>(1.11) | 1.11<br>(0.91) | 0.96 | 0.97 | 0.98 | 0.96 (0.91-0.98) | 0.97 (0.94-0.99) | 0.98 (0.95-0.99) |
| Left caudal anterior cingulate cortex  | 2.62<br>(0.20)   | 2.64<br>(0.24)   | 2.63<br>(0.21)   | 2.60<br>(0.19)   | 7.77  | 9.07  | 8.15  | 7.44  | -1.11<br>(0.28) | -0.68<br>(0.51) | 0.63<br>(0.53)  | 0.92<br>(4.21)  | 0.59<br>(4.29)  | -0.61<br>(4.72) | 3.54<br>(2.34) | 3.39<br>(2.60) | 3.42<br>(3.23) | 0.88 | 0.85 | 0.81 | 0.87 (0.71-0.94) | 0.85 (0.68-0.94) | 0.82 (0.61-0.92) |
| Left caudal middle frontal gyrus       | 2.37<br>(0.15)   | 2.37<br>(0.14)   | 2.37<br>(0.14)   | 2.37<br>(0.14)   | 6.37  | 5.83  | 5.84  | 6.01  | 0.27<br>(0.79)  | 0.62<br>(0.54)  | 0.40<br>(0.69)  | -0.09<br>(2.07) | -0.24<br>(2.05) | -0.15<br>(1.99) | 1.65<br>(1.19) | 1.60<br>(1.26) | 1.54<br>(1.23) | 0.94 | 0.95 | 0.95 | 0.94 (0.87-0.98) | 0.94 (0.87-0.98) | 0.95 (0.88-0.98) |
| Left cuneus                            | 1.83<br>(0.11)   | 1.82<br>(0.11)   | 1.83<br>(0.11)   | 1.82<br>(0.11)   | 6.03  | 5.97  | 6.02  | 6.04  | 0.63<br>(0.53)  | -0.20<br>(0.84) | 0.72<br>(0.48)  | -0.25<br>(1.84) | 0.07<br>(1.58)  | -0.21<br>(1.38) | 1.46<br>(1.10) | 1.18<br>(1.02) | 1.09<br>(0.84) | 0.95 | 0.96 | 0.98 | 0.95 (0.89-0.98) | 0.97 (0.92-0.99) | 0.98 (0.94-0.99) |
| Left entorhinal cortex                 | 2.91<br>(0.52)   | 2.90<br>(0.47)   | 2.91<br>(0.45)   | 2.93<br>(0.47)   | 17.79 | 16.18 | 15.63 | 15.90 | 0.15<br>(0.88)  | -0.02<br>(0.98) | -0.74<br>(0.46) | 0.09<br>(6.57)  | 0.39<br>(5.36)  | 1.13<br>(4.90)  | 4.57<br>(4.61) | 3.98<br>(3.51) | 3.84<br>(3.14) | 0.93 | 0.96 | 0.96 | 0.93 (0.84-0.97) | 0.95 (0.89-0.98) | 0.96 (0.90-0.98) |
| Left fusiform gyrus                    | 2.54<br>(0.21)   | 2.53<br>(0.21)   | 2.54<br>(0.21)   | 2.54<br>(0.19)   | 8.17  | 8.22  | 8.34  | 7.66  | 1.83<br>(0.08)  | 0.24<br>(0.81)  | 0.74<br>(0.47)  | -0.58<br>(1.48) | -0.11<br>(1.80) | -0.19<br>(1.50) | 1.24<br>(0.96) | 1.15<br>(1.37) | 1.27<br>(0.78) | 0.98 | 0.98 | 0.99 | 0.98 (0.96-0.99) | 0.98 (0.95-0.99) | 0.98 (0.96-0.99) |
| Left inferior parietal cortex          | 2.20<br>(0.19)   | 2.20<br>(0.19)   | 2.20<br>(0.19)   | 2.20<br>(0.19)   | 8.54  | 8.56  | 8.53  | 8.73  | -0.64<br>(0.53) | 0.19<br>(0.85)  | 0.30<br>(0.77)  | 0.14<br>(1.03)  | -0.06<br>(1.33) | -0.11<br>(1.50) | 0.79<br>(0.65) | 1.13<br>(0.66) | 1.16<br>(0.94) | 0.99 | 0.99 | 0.99 | 0.99 (0.98-1.00) | 0.99 (0.97-1.00) | 0.99 (0.97-0.99) |
| Left inferior temporal gyrus           | 2.61<br>(0.17)   | 2.60<br>(0.18)   | 2.61<br>(0.17)   | 2.60<br>(0.17)   | 6.38  | 6.92  | 6.58  | 6.43  | 1.25<br>(0.22)  | 0.45<br>(0.66)  | 1.21<br>(0.24)  | -0.53<br>(1.87) | -0.20<br>(2.01) | -0.50<br>(1.94) | 1.21<br>(1.49) | 1.62<br>(1.15) | 1.52<br>(1.27) | 0.96 | 0.95 | 0.95 | 0.96 (0.91-0.98) | 0.95 (0.90-0.98) | 0.95 (0.89-0.98) |
| Left isthmus cingulate cortex          | 2.14<br>(0.23)   | 2.11<br>(0.27)   | 2.11<br>(0.25)   | 2.11<br>(0.23)   | 10.75 | 12.86 | 12.07 | 10.89 | 2.13<br>(0.04)  | 2.59<br>(0.02)  | 2.26<br>(0.03)  | -1.80<br>(3.44) | -1.68<br>(2.92) | -1.39<br>(2.83) | 3.13<br>(2.23) | 2.63<br>(2.07) | 2.56<br>(1.78) | 0.97 | 0.98 | 0.97 | 0.95 (0.87-0.98) | 0.96 (0.89-0.99) | 0.96 (0.89-0.98) |
| Left lateral occipital cortex          | 2.08<br>(0.15)   | 2.08<br>(0.14)   | 2.08<br>(0.13)   | 2.08<br>(0.14)   | 7.14  | 6.60  | 6.41  | 6.51  | 0.92<br>(0.37)  | 0.36<br>(0.72)  | 1.11<br>(0.28)  | -0.29<br>(1.56) | -0.11<br>(1.88) | -0.36<br>(1.65) | 1.24<br>(0.95) | 1.49<br>(1.11) | 1.29<br>(1.06) | 0.98 | 0.96 | 0.97 | 0.97 (0.94-0.99) | 0.96 (0.91-0.98) | 0.97 (0.93-0.99) |
| Left lateral orbitofrontal cortex      | 2.54<br>(0.16)   | 2.52<br>(0.16)   | 2.54<br>(0.16)   | 2.53<br>(0.15)   | 6.12  | 6.18  | 6.37  | 5.94  | 2.02<br>(0.06)  | -0.07<br>(0.95) | 0.15<br>(0.88)  | -0.76<br>(1.74) | 0.01<br>(1.69)  | -0.06<br>(2.13) | 1.46<br>(1.18) | 1.26<br>(1.09) | 1.61<br>(1.35) | 0.96 | 0.96 | 0.94 | 0.95 (0.89-0.98) | 0.96 (0.91-0.98) | 0.94 (0.86-0.97) |
| Left lingual gyrus                     | 1.94<br>(0.09)   | 1.94<br>(0.09)   | 1.94<br>(0.09)   | 1.94<br>(0.10)   | 4.82  | 4.79  | 4.44  | 5.13  | -0.51<br>(0.62) | -0.58<br>(0.57) | -0.23<br>(0.82) | 0.14<br>(1.30)  | 0.17<br>(1.25)  | 0.06<br>(1.64)  | 0.97<br>(0.85) | 1.00<br>(0.75) | 1.19<br>(1.10) | 0.96 | 0.97 | 0.95 | 0.96 (0.91-0.98) | 0.97 (0.92-0.99) | 0.95 (0.89-0.98) |
| Left medial orbitofrontal cortex       | 2.24<br>(0.17)   | 2.24<br>(0.17)   | 2.24<br>(0.18)   | 2.26<br>(0.17)   | 7.52  | 7.54  | 7.87  | 7.56  | 0.17<br>(0.87)  | 0.19<br>(0.85)  | -1.42<br>(0.17) | -0.08<br>(2.32) | -0.11<br>(2.07) | 0.72<br>(2.37)  | 1.78<br>(1.44) | 1.66<br>(1.20) | 1.92<br>(1.51) | 0.95 | 0.96 | 0.95 | 0.95 (0.89-0.98) | 0.96 (0.92-0.99) | 0.95 (0.88-0.98) |
| Left middle temporal gyrus             | 2.58<br>(0.18)   | 2.57<br>(0.19)   | 2.58<br>(0.18)   | 2.57<br>(0.18)   | 6.97  | 7.38  | 6.97  | 6.84  | 1.05<br>(0.30)  | 0.78<br>(0.44)  | 1.31<br>(0.21)  | -0.41<br>(1.71) | -0.22<br>(1.30) | -0.42<br>(1.54) | 1.03<br>(1.41) | 1.12<br>(0.66) | 1.19<br>(1.03) | 0.97 | 0.98 | 0.98 | 0.97 (0.94-0.99) | 0.98 (0.96-0.99) | 0.97 (0.94-0.99) |
| Left parahippocampal gyrus             | 2.54<br>(0.27)   | 2.52<br>(0.27)   | 2.53<br>(0.26)   | 2.52<br>(0.28)   | 10.81 | 10.64 | 10.25 | 10.99 | 2.38<br>(0.03)  | 0.62<br>(0.54)  | 1.79<br>(0.09)  | -0.91<br>(1.82) | -0.24<br>(2.12) | -0.89<br>(2.30) | 1.63<br>(1.18) | 1.74<br>(1.18) | 2.10<br>(1.23) | 0.99 | 0.98 | 0.98 | 0.98 (0.95-0.99) | 0.98 (0.95-0.99) | 0.98 (0.94-0.99) |
| Left paracentral lobule                | 2.30<br>(0.13)   | 2.29<br>(0.12)   | 2.28<br>(0.13)   | 2.30<br>(0.12)   | 5.51  | 5.04  | 5.87  | 5.20  | 1.25<br>(0.23)  | 2.16<br>(0.04)  | -0.02<br>(0.98) | -0.52<br>(2.00) | -0.95<br>(2.06) | 0.02<br>(2.00)  | 1.50<br>(1.39) | 1.59<br>(1.60) | 1.60<br>(1.16) | 0.93 | 0.94 | 0.93 | 0.92 (0.83-0.97) | 0.93 (0.82-0.97) | 0.93 (0.84-0.97) |
| Left pars opercularis                  | 2.48<br>(0.08)   | 2.48<br>(0.09)   | 2.48<br>(0.09)   | 2.47<br>(0.09)   | 3.31  | 3.68  | 3.53  | 3.63  | 0.71<br>(0.49)  | 0.28<br>(0.78)  | 1.85<br>(0.08)  | -0.21<br>(1.36) | -0.08<br>(1.25) | -0.53<br>(1.32) | 0.95<br>(0.98) | 1.04<br>(0.67) | 1.07<br>(0.91) | 0.93 | 0.94 | 0.93 | 0.93 (0.84-0.97) | 0.94 (0.85-0.97) | 0.92 (0.81-0.97) |
| Left pars orbitalis                    | 2.61<br>(0.22)   | 2.59<br>(0.23)   | 2.60<br>(0.22)   | 2.59<br>(0.22)   | 8.31  | 9.01  | 8.54  | 8.67  | 1.45<br>(0.16)  | 0.22<br>(0.83)  | 1.13<br>(0.27)  | -0.86<br>(2.69) | -0.13<br>(2.29) | -0.66<br>(2.60) | 2.14<br>(1.79) | 1.79<br>(1.39) | 2.08<br>(1.64) | 0.96 | 0.96 | 0.95 | 0.95 (0.89-0.98) | 0.96 (0.91-0.98) | 0.95 (0.89-0.98) |
| Left pars triangularis                 | 2.33<br>(0.11)   | 2.32<br>(0.13)   | 2.32<br>(0.11)   | 2.32<br>(0.13)   | 4.91  | 5.41  | 4.88  | 5.51  | 1.52<br>(0.14)  | 1.37<br>(0.18)  | 1.84<br>(0.08)  | -0.60<br>(1.76) | -0.45<br>(1.52) | -0.63<br>(1.53) | 1.37<br>(1.23) | 1.08<br>(1.14) | 1.29<br>(1.00) | 0.95 | 0.95 | 0.96 | 0.94 (0.86-0.97) | 0.95 (0.88-0.98) | 0.95 (0.89-0.98) |
| Left pericalcarine cortex              | 1.60<br>(0.09)   | 1.60<br>(0.09)   | 1.60<br>(0.10)   | 1.60<br>(0.10)   | 5.88  | 5.86  | 6.03  | 6.27  | 0.39<br>(0.70)  | 0.33<br>(0.75)  | -0.65<br>(0.52) | -0.22<br>(2.67) | -0.16<br>(2.16) | 0.29<br>(2.27)  | 2.04<br>(1.67) | 1.59<br>(1.42) | 1.78<br>(1.38) | 0.90 | 0.93 | 0.93 | 0.90 (0.77-0.96) | 0.93 (0.85-0.97) | 0.93 (0.85-0.97) |
| Left postcentral gyrus                 | 2.00<br>(0.12)   | 2.00<br>(0.12)   | 1.99<br>(0.12)   | 2.00<br>(0.11)   | 5.96  | 5.78  | 5.98  | 5.67  | -0.65<br>(0.52) | 0.84<br>(0.41)  | 0.31<br>(0.76)  | 0.15<br>(0.96)  | -0.21<br>(1.17) | -0.04<br>(0.89) | 0.79<br>(0.55) | 0.99<br>(0.63) | 0.72<br>(0.51) | 0.99 | 0.98 | 0.99 | 0.99 (0.97-0.99) | 0.98 (0.96-0.99) | 0.99 (0.97-1.00) |
| Left posterior cingulate cortex        | 2.28<br>(0.17)   | 2.26<br>(0.17)   | 2.27<br>(0.18)   | 2.24<br>(0.16)   | 7.30  | 7.58  | 7.98  | 7.31  | 1.40<br>(0.18)  | 0.85<br>(0.40)  | 2.72<br>(0.01)  | -1.02<br>(3.47) | -0.67<br>(3.42) | -1.82<br>(3.12) | 2.89<br>(2.10) | 2.63<br>(2.23) | 2.94<br>(2.04) | 0.90 | 0.90 | 0.91 | 0.90 (0.77-0.96) | 0.90 (0.78-0.96) | 0.88 (0.68-0.95) |
| Left precentral gyrus                  | 2.46<br>(0.14)   | 2.46<br>(0.13)   | 2.46<br>(0.14)   | 2.46<br>(0.13)   | 5.55  | 5.39  | 5.50  | 5.27  | -0.47<br>(0.64) | -0.68<br>(0.51) | -0.59<br>(0.56) | 0.10<br>(0.87)  | 0.15<br>(1.03)  | 0.15<br>(1.12)  | 0.67<br>(0.55) | 0.80<br>(0.64) | 0.91<br>(0.64) | 0.99 | 0.98 | 0.98 | 0.99 (0.97-0.99) | 0.98 (0.96-0.99) | 0.98 (0.95-0.99) |
| Left precuneus                         | 2.19<br>(0.19)   | 2.19<br>(0.19)   | 2.18<br>(0.19)   | 2.19<br>(0.18)   | 8.46  | 8.76  | 8.78  | 8.26  | -0.75<br>(0.46) | 0.90<br>(0.38)  | 0.68<br>(0.50)  | 0.15<br>(1.15)  | -0.25<br>(1.21) | -0.12<br>(0.93) | 0.87<br>(0.74) | 0.96<br>(0.76) | 0.78<br>(0.49) | 0.99 | 0.99 | 0.99 | 0.99 (0.98-1.00) | 0.99 (0.98-1.00) | 0.99 (0.99-1.00) |
| Left rostral anterior cingulate cortex | 2.59<br>(0.28)   | 2.61<br>(0.29)   | 2.61<br>(0.26)   | 2.61<br>(0.29)   | 10.75 | 11.14 | 9.84  | 11.03 | -0.76<br>(0.45) | -1.04<br>(0.31) | -0.81<br>(0.43) | 0.91<br>(5.78)  | 0.98<br>(3.99)  | 0.81<br>(4.93)  | 3.53<br>(4.60) | 2.64<br>(3.10) | 3.17<br>(3.80) | 0.86 | 0.92 | 0.90 | 0.86 (0.69-0.94) | 0.92 (0.82-0.97) | 0.90 (0.78-0.96) |
| Left rostral middle frontal gyrus      | 2.24<br>(0.12)   | 2.24<br>(0.13)   | 2.24<br>(0.12)   | 2.23<br>(0.11)   | 5.40  | 5.76  | 5.56  | 5.03  | -0.02<br>(0.99) | -0.78<br>(0.44) | 1.17<br>(0.26)  | -0.01<br>(1.68) | 0.24<br>(1.51)  | -0.46<br>(1.87) | 1.22<br>(1.13) | 1.20<br>(0.92) | 1.30<br>(1.40) | 0.95 | 0.96 | 0.94 | 0.95 (0.89-0.98) | 0.96 (0.91-0.98) | 0.93 (0.85-0.97) |
| Left superior frontal gyrus            | 2.49<br>(0.14)   | 2.48<br>(0.14)   | 2.49<br>(0.14)   | 2.49<br>(0.14)   | 5.62  | 5.67  | 5.63  | 5.72  | 1.50<br>(0.15)  | 0.70<br>(0.49)  | 0.60<br>(0.55)  | -0.37<br>(1.16) | -0.23<br>(1.52) | -0.17<br>(1.24) | 0.97<br>(0.70) | 1.24<br>(0.87) | 1.06<br>(0.63) | 0.98 | 0.96 | 0.98 | 0.98 (0.95-0.99) | 0.96 (0.92-0.98) | 0.98 (0.95-0.99) |
| Left superior parietal cortex          | 2.06<br>(0.18)   | 2.05<br>(0.17)   | 2.05<br>(0.17)   | 2.05<br>(0.17)   | 8.50  | 8.22  | 8.19  | 8.37  | 1.44<br>(0.16)  | 0.88<br>(0.39)  | 1.07<br>(0.30)  | -0.37<br>(1.24) | -0.22<br>(1     |                 |                |                |                |      |      |      |                  |                  |                  |

|                                         |                |                |                |                |       |       |       |       |                 |                 |                 |                 |                 |                 |                |                |                |      |      |      |                  |                  |                  |
|-----------------------------------------|----------------|----------------|----------------|----------------|-------|-------|-------|-------|-----------------|-----------------|-----------------|-----------------|-----------------|-----------------|----------------|----------------|----------------|------|------|------|------------------|------------------|------------------|
| Left temporal pole                      | 3.32<br>(0.37) | 3.28<br>(0.36) | 3.29<br>(0.35) | 3.32<br>(0.40) | 11.12 | 11.06 | 10.65 | 12.21 | 1.24<br>(0.23)  | 1.14<br>(0.27)  | 0.21<br>(0.83)  | -1.33<br>(5.17) | -0.90<br>(4.06) | -0.31<br>(4.15) | 3.77<br>(3.70) | 2.98<br>(2.83) | 2.75<br>(3.06) | 0.89 | 0.94 | 0.94 | 0.89 (0.76-0.95) | 0.93 (0.85-0.97) | 0.94 (0.86-0.98) |
| Left transverse temporal gyrus          | 2.27<br>(0.21) | 2.25<br>(0.23) | 2.27<br>(0.23) | 2.26<br>(0.23) | 9.25  | 10.31 | 10.17 | 10.07 | 1.58<br>(0.13)  | 0.10<br>(0.92)  | 0.68<br>(0.51)  | -0.85<br>(2.40) | -0.13<br>(2.37) | -0.30<br>(1.57) | 1.87<br>(1.70) | 1.71<br>(1.61) | 1.17<br>(1.06) | 0.98 | 0.98 | 0.99 | 0.97 (0.93-0.99) | 0.97 (0.93-0.99) | 0.99 (0.97-0.99) |
| Left insula                             | 2.72<br>(0.21) | 2.70<br>(0.19) | 2.75<br>(0.22) | 2.72<br>(0.21) | 7.64  | 6.88  | 7.98  | 7.88  | 0.82<br>(0.42)  | -1.41<br>(0.17) | -0.10<br>(0.92) | -0.56<br>(3.25) | 1.17<br>(3.99)  | 0.06<br>(3.98)  | 2.46<br>(2.14) | 3.05<br>(2.76) | 3.27<br>(2.16) | 0.89 | 0.87 | 0.87 | 0.89 (0.75-0.95) | 0.86 (0.70-0.94) | 0.87 (0.72-0.95) |
| Right banks superior temporal sulcus    | 2.37<br>(0.14) | 2.36<br>(0.16) | 2.37<br>(0.15) | 2.37<br>(0.15) | 6.07  | 6.67  | 6.42  | 6.45  | 0.75<br>(0.46)  | 0.06<br>(0.95)  | -0.18<br>(0.86) | -0.26<br>(1.42) | -0.04<br>(1.52) | 0.04<br>(1.66)  | 1.14<br>(0.85) | 1.18<br>(0.93) | 1.38<br>(0.89) | 0.98 | 0.97 | 0.97 | 0.98 (0.94-0.99) | 0.97 (0.93-0.99) | 0.97 (0.92-0.99) |
| Right caudal anterior cingulate cortex  | 2.46<br>(0.18) | 2.43<br>(0.18) | 2.41<br>(0.16) | 2.42<br>(0.18) | 7.51  | 7.39  | 6.72  | 7.59  | 1.13<br>(0.27)  | 3.40<br>(0.00)  | 2.62<br>(0.02)  | -0.91<br>(4.10) | -1.84<br>(2.58) | -1.29<br>(2.47) | 3.02<br>(2.85) | 2.46<br>(1.96) | 2.18<br>(1.69) | 0.87 | 0.94 | 0.95 | 0.87 (0.71-0.94) | 0.90 (0.66-0.97) | 0.94 (0.83-0.98) |
| Right caudal middle frontal gyrus       | 2.38<br>(0.17) | 2.37<br>(0.16) | 2.37<br>(0.17) | 2.39<br>(0.17) | 7.08  | 6.90  | 7.00  | 6.94  | 0.47<br>(0.64)  | 0.62<br>(0.54)  | -1.24<br>(0.23) | -0.15<br>(1.68) | -0.18<br>(1.41) | 0.47<br>(1.78)  | 1.36<br>(0.94) | 1.13<br>(0.82) | 1.42<br>(1.14) | 0.97 | 0.98 | 0.97 | 0.97 (0.94-0.99) | 0.98 (0.95-0.99) | 0.97 (0.93-0.99) |
| Right cuneus                            | 1.85<br>(0.13) | 1.85<br>(0.13) | 1.85<br>(0.13) | 1.85<br>(0.13) | 6.97  | 6.98  | 6.95  | 6.98  | 0.18<br>(0.86)  | -0.11<br>(0.92) | 0.85<br>(0.85)  | -0.06<br>(1.62) | 0.04<br>(1.52)  | -0.06<br>(1.36) | 1.26<br>(0.98) | 1.30<br>(0.75) | 1.08<br>(0.79) | 0.97 | 0.98 | 0.98 | 0.97 (0.93-0.99) | 0.98 (0.95-0.99) | 0.98 (0.96-0.99) |
| Right entorhinal cortex                 | 3.05<br>(0.45) | 3.01<br>(0.48) | 3.03<br>(0.47) | 3.08<br>(0.43) | 14.89 | 15.84 | 15.34 | 14.11 | 1.03<br>(0.32)  | 0.38<br>(0.71)  | -0.73<br>(0.47) | -1.24<br>(5.03) | -0.58<br>(6.12) | 1.03<br>(6.04)  | 3.76<br>(3.49) | 4.00<br>(4.58) | 5.08<br>(3.24) | 0.95 | 0.92 | 0.91 | 0.95 (0.87-0.98) | 0.92 (0.82-0.97) | 0.91 (0.80-0.96) |
| Right fusiform gyrus                    | 2.54<br>(0.20) | 2.53<br>(0.21) | 2.54<br>(0.20) | 2.54<br>(0.21) | 8.00  | 8.15  | 8.07  | 8.10  | 0.26<br>(0.80)  | -0.56<br>(0.58) | -0.80<br>(0.43) | -0.08<br>(1.16) | 0.18<br>(1.54)  | 0.29<br>(1.72)  | 0.93<br>(0.67) | 1.27<br>(0.84) | 1.36<br>(1.05) | 0.99 | 0.98 | 0.98 | 0.99 (0.98-1.00) | 0.98 (0.96-0.99) | 0.98 (0.95-0.99) |
| Right inferior parietal cortex          | 2.21<br>(0.14) | 2.21<br>(0.15) | 2.21<br>(0.15) | 2.21<br>(0.16) | 6.32  | 6.72  | 6.87  | 7.17  | -0.61<br>(0.55) | 0.12<br>(0.91)  | 0.14<br>(0.89)  | 0.11<br>(1.11)  | -0.07<br>(1.35) | -0.11<br>(1.73) | 0.89<br>(0.64) | 1.00<br>(0.88) | 1.18<br>(1.24) | 0.99 | 0.98 | 0.98 | 0.99 (0.97-0.99) | 0.98 (0.95-0.99) | 0.97 (0.93-0.99) |
| Right inferior temporal gyrus           | 2.62<br>(0.12) | 2.62<br>(0.11) | 2.62<br>(0.13) | 2.64<br>(0.12) | 4.60  | 4.33  | 4.78  | 4.48  | -0.61<br>(0.55) | 0.20<br>(0.85)  | -1.97<br>(0.06) | 0.25<br>(1.83)  | -0.06<br>(1.19) | 0.74<br>(1.78)  | 1.24<br>(1.35) | 0.95<br>(0.70) | 1.43<br>(1.27) | 0.92 | 0.97 | 0.93 | 0.92 (0.82-0.97) | 0.97 (0.93-0.99) | 0.92 (0.80-0.97) |
| Right isthmus cingulate cortex          | 2.09<br>(0.21) | 2.06<br>(0.20) | 2.07<br>(0.25) | 2.07<br>(0.26) | 10.03 | 9.71  | 11.91 | 12.78 | 1.50<br>(0.15)  | 0.86<br>(0.40)  | 0.72<br>(0.48)  | -1.14<br>(3.74) | -1.01<br>(4.88) | -1.11<br>(6.16) | 2.61<br>(2.86) | 3.02<br>(3.92) | 2.86<br>(5.54) | 0.93 | 0.94 | 0.95 | 0.93 (0.83-0.97) | 0.93 (0.84-0.97) | 0.92 (0.83-0.97) |
| Right lateral occipital cortex          | 2.08<br>(0.13) | 2.09<br>(0.14) | 2.08<br>(0.14) | 2.09<br>(0.14) | 6.32  | 6.53  | 6.50  | 6.80  | -1.41<br>(0.17) | -0.29<br>(0.78) | -1.08<br>(0.29) | 0.32<br>(1.14)  | 0.09<br>(1.58)  | 0.25<br>(1.23)  | 0.77<br>(0.89) | 1.22<br>(0.96) | 1.09<br>(0.59) | 0.99 | 0.97 | 0.99 | 0.98 (0.96-0.99) | 0.97 (0.93-0.99) | 0.98 (0.96-0.99) |
| Right lateral orbitofrontal cortex      | 2.51<br>(0.12) | 2.50<br>(0.12) | 2.50<br>(0.13) | 2.50<br>(0.14) | 4.74  | 4.87  | 5.36  | 5.76  | 0.72<br>(0.48)  | 0.54<br>(0.60)  | 0.29<br>(0.77)  | -0.27<br>(1.68) | -0.28<br>(2.20) | -0.28<br>(3.65) | 1.34<br>(1.01) | 1.73<br>(1.35) | 2.34<br>(2.77) | 0.94 | 0.91 | 0.76 | 0.94 (0.86-0.97) | 0.91 (0.79-0.96) | 0.75 (0.49-0.89) |
| Right lingual gyrus                     | 2.00<br>(0.12) | 1.99<br>(0.13) | 2.00<br>(0.13) | 1.99<br>(0.12) | 6.25  | 6.37  | 6.49  | 6.26  | 0.82<br>(0.42)  | 0.03<br>(0.98)  | 0.97<br>(0.34)  | -0.34<br>(2.00) | -0.02<br>(1.36) | -0.38<br>(1.97) | 1.36<br>(1.48) | 1.03<br>(0.85) | 1.18<br>(1.60) | 0.95 | 0.98 | 0.96 | 0.95 (0.89-0.98) | 0.98 (0.95-0.99) | 0.96 (0.90-0.98) |
| Right medial orbitofrontal cortex       | 2.33<br>(0.14) | 2.31<br>(0.15) | 2.32<br>(0.15) | 2.34<br>(0.17) | 5.97  | 6.69  | 6.63  | 7.19  | 1.32<br>(0.20)  | 0.76<br>(0.45)  | -0.66<br>(0.51) | -0.66<br>(2.24) | -0.40<br>(2.22) | 0.34<br>(2.92)  | 1.97<br>(1.20) | 1.77<br>(1.34) | 1.92<br>(2.19) | 0.94 | 0.94 | 0.92 | 0.94 (0.86-0.97) | 0.94 (0.86-0.97) | 0.90 (0.79-0.96) |
| Right middle temporal gyrus             | 2.67<br>(0.16) | 2.66<br>(0.16) | 2.67<br>(0.16) | 2.67<br>(0.17) | 5.87  | 6.14  | 6.12  | 6.32  | 2.00<br>(0.06)  | 0.47<br>(0.64)  | 0.47<br>(0.64)  | -0.41<br>(0.93) | -0.13<br>(1.14) | -0.16<br>(1.36) | 0.81<br>(0.59) | 0.88<br>(0.71) | 1.08<br>(0.81) | 0.99 | 0.98 | 0.98 | 0.99 (0.97-0.99) | 0.98 (0.96-0.99) | 0.98 (0.95-0.99) |
| Right parahippocampal gyrus             | 2.53<br>(0.31) | 2.52<br>(0.30) | 2.51<br>(0.32) | 2.53<br>(0.30) | 12.43 | 12.03 | 12.66 | 11.75 | 1.46<br>(0.16)  | 1.37<br>(0.18)  | 0.17<br>(0.86)  | -0.52<br>(1.95) | -0.83<br>(2.85) | 0.00<br>(2.31)  | 1.63<br>(1.14) | 2.36<br>(1.74) | 1.86<br>(1.31) | 0.99 | 0.98 | 0.98 | 0.99 (0.97-1.00) | 0.98 (0.94-0.99) | 0.98 (0.96-0.99) |
| Right paracentral lobule                | 2.31<br>(0.12) | 2.30<br>(0.13) | 2.29<br>(0.13) | 2.29<br>(0.14) | 5.40  | 5.78  | 5.53  | 6.06  | 0.42<br>(0.68)  | 2.53<br>(0.02)  | 2.01<br>(0.06)  | -0.18<br>(1.75) | -0.66<br>(1.26) | -0.82<br>(1.89) | 1.44<br>(0.96) | 1.10<br>(0.88) | 1.52<br>(1.36) | 0.96 | 0.98 | 0.95 | 0.95 (0.89-0.98) | 0.97 (0.91-0.99) | 0.94 (0.86-0.98) |
| Right pars opercularis                  | 2.47<br>(0.12) | 2.47<br>(0.13) | 2.48<br>(0.13) | 2.48<br>(0.11) | 4.74  | 5.19  | 5.30  | 4.27  | 0.13<br>(0.90)  | -0.35<br>(0.73) | -0.64<br>(0.53) | -0.07<br>(1.64) | 0.10<br>(1.66)  | 0.26<br>(1.81)  | 1.21<br>(1.07) | 1.26<br>(1.04) | 1.30<br>(1.25) | 0.95 | 0.95 | 0.93 | 0.95 (0.88-0.98) | 0.95 (0.88-0.98) | 0.93 (0.83-0.97) |
| Right pars orbitalis                    | 2.56<br>(0.17) | 2.56<br>(0.18) | 2.55<br>(0.18) | 2.56<br>(0.18) | 6.54  | 7.14  | 7.09  | 7.13  | -0.46<br>(0.65) | 0.42<br>(0.68)  | -0.27<br>(0.79) | 0.17<br>(2.09)  | -0.25<br>(2.35) | 0.09<br>(2.25)  | 1.46<br>(1.48) | 1.91<br>(1.33) | 1.64<br>(1.50) | 0.95 | 0.94 | 0.95 | 0.95 (0.89-0.98) | 0.94 (0.86-0.97) | 0.95 (0.88-0.98) |
| Right pars triangularis                 | 2.35<br>(0.15) | 2.34<br>(0.15) | 2.36<br>(0.15) | 2.36<br>(0.15) | 6.22  | 6.25  | 6.55  | 6.56  | 0.73<br>(0.47)  | -1.01<br>(0.32) | -0.83<br>(0.42) | -0.24<br>(1.48) | 0.39<br>(1.83)  | 0.25<br>(1.57)  | 1.11<br>(0.98) | 1.41<br>(1.19) | 1.21<br>(1.00) | 0.97 | 0.96 | 0.97 | 0.97 (0.93-0.99) | 0.96 (0.90-0.98) | 0.97 (0.93-0.99) |
| Right pericalcarine cortex              | 1.62<br>(0.12) | 1.61<br>(0.12) | 1.61<br>(0.13) | 1.61<br>(0.11) | 7.38  | 7.43  | 7.85  | 6.87  | 1.56<br>(0.13)  | 1.74<br>(0.10)  | 1.19<br>(0.25)  | -0.63<br>(1.86) | -0.98<br>(2.51) | -0.70<br>(2.92) | 1.41<br>(1.33) | 1.97<br>(1.81) | 1.88<br>(2.30) | 0.97 | 0.94 | 0.92 | 0.97 (0.92-0.99) | 0.94 (0.85-0.97) | 0.91 (0.81-0.96) |
| Right postcentral gyrus                 | 1.97<br>(0.09) | 1.97<br>(0.10) | 1.96<br>(0.10) | 1.97<br>(0.10) | 4.76  | 4.84  | 5.09  | 5.26  | 0.48<br>(0.63)  | 1.34<br>(0.19)  | 0.42<br>(0.68)  | -0.11<br>(1.04) | -0.44<br>(1.51) | -0.14<br>(1.27) | 0.80<br>(0.66) | 1.25<br>(0.92) | 1.02<br>(0.75) | 0.98 | 0.96 | 0.97 | 0.98 (0.95-0.99) | 0.95 (0.89-0.98) | 0.97 (0.93-0.99) |
| Right posterior cingulate cortex        | 2.27<br>(0.21) | 2.27<br>(0.24) | 2.25<br>(0.21) | 2.27<br>(0.23) | 9.38  | 10.41 | 9.19  | 9.98  | -0.15<br>(0.88) | 0.63<br>(0.54)  | -0.16<br>(0.87) | 0.04<br>(4.68)  | -0.57<br>(4.38) | 0.09<br>(5.36)  | 2.80<br>(3.69) | 3.28<br>(2.86) | 3.57<br>(3.92) | 0.89 | 0.89 | 0.84 | 0.89 (0.75-0.95) | 0.89 (0.76-0.95) | 0.85 (0.66-0.93) |
| Right precentral gyrus                  | 2.49<br>(0.12) | 2.48<br>(0.13) | 2.48<br>(0.12) | 2.49<br>(0.12) | 4.86  | 5.17  | 4.99  | 4.64  | 0.91<br>(0.37)  | 0.80<br>(0.43)  | -0.11<br>(0.91) | -0.27<br>(1.32) | -0.26<br>(1.47) | 0.04<br>(1.15)  | 1.01<br>(0.87) | 0.96<br>(1.13) | 0.81<br>(0.81) | 0.97 | 0.95 | 0.97 | 0.97 (0.92-0.99) | 0.96 (0.90-0.98) | 0.97 (0.94-0.99) |
| Right precuneus                         | 2.18<br>(0.17) | 2.18<br>(0.17) | 2.18<br>(0.17) | 2.18<br>(0.18) | 7.64  | 7.85  | 7.87  | 8.09  | 0.41<br>(0.69)  | 0.06<br>(0.96)  | -0.04<br>(0.97) | -0.12<br>(1.18) | -0.03<br>(1.22) | -0.03<br>(1.05) | 0.82<br>(0.84) | 1.02<br>(0.64) | 0.83<br>(0.62) | 0.99 | 0.99 | 0.99 | 0.99 (0.97-1.00) | 0.99 (0.97-1.00) | 0.99 (0.98-1.00) |
| Right rostral anterior cingulate cortex | 2.89<br>(0.26) | 2.89<br>(0.28) | 2.89<br>(0.28) | 2.89<br>(0.26) | 9.13  | 9.84  | 9.63  | 8.89  | -0.27<br>(0.79) | 0.01<br>(0.99)  | -0.14<br>(0.89) | 0.13<br>(3.23)  | -0.05<br>(3.22) | 0.07<br>(1.91)  | 2.53<br>(1.93) | 2.08<br>(2.42) | 1.35<br>(1.31) | 0.95 | 0.95 | 0.98 | 0.95 (0.88-0.98) | 0.95 (0.88-0.98) | 0.98 (0.95-0.99) |
| Right rostral middle frontal gyrus      | 2.26<br>(0.13) | 2.26<br>(0.15) | 2.26<br>(0.14) | 2.25<br>(0.14) | 5.93  | 6.47  | 6.22  | 6.26  | 1.01<br>(0.32)  | 0.09<br>(0.93)  | 1.74<br>(0.10)  | -0.31<br>(1.30) | -0.05<br>(1.60) | -0.58<br>(1.46) | 1.08<br>(0.76) | 1.38<br>(0.76) | 1.28<br>(0.87) | 0.98 | 0.97 | 0.97 | 0.98 (0.95-0.99) | 0.97 (0.92-0.99) | 0.97 (0.92-0.99) |
| Right superior frontal gyrus            | 2.54<br>(0.13) | 2.53<br>(0.14) | 2.53<br>(0.13) | 2.53<br>(0.14) | 5.18  | 5.36  | 5.15  | 5.44  | 2.03<br>(0.06)  | 0.75<br>(0.46)  | 0.89<br>(0.39)  | -0.41<br>(0.93) | -0.22<br>(1.35) | -0.20<br>(0.96) | 0.83<br>(0.57) | 1.05<br>(0.85) | 0.73<br>(0.64) | 0.99 | 0.97 | 0.98 | 0.98 (0.95-0.99) | 0.97 (0.92-0.99) | 0.98 (0.96-0.99) |
| Right superior parietal cortex          | 2.05<br>(0.16) | 2.06<br>(0.16) | 2.05<br>(0.17) | 2.06<br>(0.17) | 7.79  | 8.02  | 8.14  | 8.11  | -1.05<br>(0.31) | 0.45<br>(0.66)  | -0.61<br>(0.55) | 0.19<br>(0.88)  | -0.20<br>(1.77) | 0.12<br>(1.07)  | 0.73<br>(0.50) | 1.30<br>(1.18) | 0.87<br>(0.60) | 0.99 | 0.98 | 0.99 | 0.99 (0.98-1.00) | 0.98 (0.95-0.99) | 0.99 (0.98-1.00) |
| Right superior temporal gyrus           | 2.57<br>(0.13) | 2.56<br>(0.13) | 2.57<br>(0.14) | 2.56<br>(0.14) | 4.90  | 5.14  | 5.49  | 5.43  | 1.45<br>(0.16)  | 0.08<br>(0.94)  | 0.90<br>(0.38)  | -0.23<br>(0.75) | -0.04<br>(0.90) | -0.23<br>(1.17) | 0.64<br>(0.44) | 0.66<br>(0.60) | 0.76<br>(0.90) | 0.99 | 0.99 | 0.98 | 0.99 (0.97-1.00) | 0.99 (0.97-0.99) | 0.98 (0.95-0.99) |
| Right supramarginal gyrus               | 2.35<br>(0.09) | 2.35<br>(0.10) | 2.35<br>(0.08) | 2.36<br>(0.10) | 3.96  | 4.23  | 3.60  | 4.20  | -0.40<br>(0.69) | 0.04<br>(0.97)  | -1.04<br>(0.31) | 0.07<br>(0.95)  | 0.00<br>(1.53)  | 0.34<br>(1.58)  | 0.75<br>(0.57) | 1.21<br>(0.90) | 1.28<br>(0.95) | 0.97 | 0.92 | 0.93 | 0.97 (0.94-0.99) | 0.92 (0.82-0.97) | 0.93 (0.83-0.97) |
| Right frontal pole                      | 2.63<br>(0.26) | 2.61<br>(0.24) | 2.63<br>(0.26) | 2.61<br>(0.25) | 9.91  | 9.38  | 10.06 | 9.53  | 1.21<br>(0.24)  | 0.39<br>(0.70)  | 1.89<br>(0.07)  | -0.90<br>(3.56) | -0.28<br>(3.13) | -1.02<br>(2.48) | 2.90<br>(2.18) | 2.30<br>(2.08) | 2.29<br>(1.33) | 0.93 | 0.95 | 0.97 | 0.93 (0.84-0.97) | 0.96 (0.90-0.98) | 0.96 (0.90-0.98) |
| Right temporal pole                     | 3.38<br>(0.34) | 3.43<br>(0.31) | 3.36<br>(0.32) | 3.47<br>(0.29) | 10.08 | 9.02  | 9.61  | 8.25  | -0.97<br>(0.34) | 0.86<br>(0.40)  | -1.71<br>(0.10) | 1.32<br>(6.24)  | -0.82<br>(4.90) | 2.53<br>(6.87)  | 3.66<br>(5.17) | 3.70<br>(3.23) | 4.17<br>(5.97) | 0.81 | 0.89 | 0.76 | 0.81 (0.60-0.91) | 0.89 (0.75-0.95) | 0.73 (0.46-0.88) |
| Right transverse temporal gyrus         | 2.34<br>(0.31) | 2.33<br>(0.30) | 2.34<br>(0.32) | 2.35<br>(0.31) | 13.30 | 13.09 | 13.72 | 13.36 | 1.04<br>(0.31)  | -0.41<br>(0.69) | -0.92<br>(0.37) | -0.44<br>(2.29) | 0.09<br>(1.69)  | 0.36<br>(1.98)  | 1.69<br>(1.57) | 1.35<br>(0.98) | 1.47<br>(1.34) | 0.99 | 0.99 | 0.99 | 0.99 (0.97       |                  |                  |

|                                                      |                     |                     |                     |                     |       |       |       |       |                 |                 |                 |                 |                 |                  |                |                |                |      |      |      |                  |                  |                  |
|------------------------------------------------------|---------------------|---------------------|---------------------|---------------------|-------|-------|-------|-------|-----------------|-----------------|-----------------|-----------------|-----------------|------------------|----------------|----------------|----------------|------|------|------|------------------|------------------|------------------|
|                                                      |                     |                     |                     | (25.55)             |       |       |       |       |                 |                 |                 |                 |                 |                  |                |                |                |      |      |      |                  |                  |                  |
| Left total cortical white matter (ml)                | 204.85<br>(34.21)   | 206.10<br>(35.09)   | 205.36<br>(33.72)   | 205.51<br>(33.73)   | 16.70 | 17.03 | 16.42 | 16.41 | -2.50<br>(0.02) | -1.16<br>(0.26) | -1.99<br>(0.06) | 0.57<br>(1.10)  | 0.30<br>(1.06)  | 0.37<br>(0.85)   | 0.99<br>(0.73) | 0.80<br>(0.74) | 0.74<br>(0.55) | 1.00 | 1.00 | 1.00 | 1.00 (0.99-1.00) | 1.00 (1.00-1.00) | 1.00 (1.00-1.00) |
| Right total cortical white matter (ml)               | 205.81<br>(33.43)   | 206.33<br>(34.81)   | 206.45<br>(33.01)   | 206.61<br>(34.28)   | 16.24 | 16.87 | 15.99 | 16.59 | -1.21<br>(0.24) | -1.42<br>(0.17) | -1.91<br>(0.07) | 0.16<br>(0.96)  | 0.34<br>(0.99)  | 0.34<br>(0.91)   | 0.75<br>(0.60) | 0.83<br>(0.62) | 0.74<br>(0.61) | 1.00 | 1.00 | 1.00 | 1.00 (1.00-1.00) | 1.00 (0.99-1.00) | 1.00 (1.00-1.00) |
| Left total cortical surface area (cm <sup>2</sup> )  | 764.44<br>(98.33)   | 767.48<br>(99.08)   | 765.73<br>(97.73)   | 767.93<br>(97.43)   | 12.86 | 12.91 | 12.76 | 12.69 | -3.06<br>(0.01) | -1.34<br>(0.19) | -3.80<br>(0.00) | 0.40<br>(0.66)  | 0.18<br>(0.65)  | 0.48<br>(0.64)   | 0.54<br>(0.54) | 0.46<br>(0.49) | 0.58<br>(0.55) | 1.00 | 1.00 | 1.00 | 1.00 (0.99-1.00) | 1.00 (1.00-1.00) | 1.00 (0.99-1.00) |
| Right total cortical surface area (cm <sup>2</sup> ) | 770.18<br>(99.46)   | 771.90<br>(101.43)  | 771.59<br>(99.72)   | 773.14<br>(101.86)  | 12.91 | 13.14 | 12.92 | 13.17 | -1.81<br>(0.09) | -1.32<br>(0.20) | -2.67<br>(0.01) | 0.19<br>(0.57)  | 0.18<br>(0.63)  | 0.35<br>(0.64)   | 0.49<br>(0.33) | 0.50<br>(0.40) | 0.57<br>(0.44) | 1.00 | 1.00 | 1.00 | 1.00 (1.00-1.00) | 1.00 (1.00-1.00) | 1.00 (0.99-1.00) |
| Left mean cortical thickness (mm)                    | 2.31<br>(0.10)      | 2.31<br>(0.10)      | 2.31<br>(0.10)      | 2.31<br>(0.10)      | 4.21  | 4.31  | 4.31  | 4.12  | 1.13<br>(0.27)  | 0.39<br>(0.70)  | 1.11<br>(0.28)  | -0.15<br>(0.60) | -0.07<br>(0.75) | -0.16<br>(0.69)  | 0.52<br>(0.31) | 0.58<br>(0.47) | 0.57<br>(0.40) | 0.99 | 0.98 | 0.99 | 0.99 (0.98-1.00) | 0.98 (0.96-0.99) | 0.99 (0.97-0.99) |
| Right mean cortical thickness (mm)                   | 2.33<br>(0.09)      | 2.32<br>(0.10)      | 2.32<br>(0.10)      | 2.33<br>(0.10)      | 4.07  | 4.21  | 4.28  | 4.24  | 1.37<br>(0.19)  | 1.03<br>(0.31)  | -0.18<br>(0.86) | -0.14<br>(0.46) | -0.17<br>(0.75) | 0.02<br>(0.59)   | 0.35<br>(0.32) | 0.59<br>(0.47) | 0.43<br>(0.39) | 0.99 | 0.98 | 0.99 | 0.99 (0.98-1.00) | 0.98 (0.96-0.99) | 0.99 (0.98-1.00) |
| Left cerebellar white matter (ml)                    | 14.80<br>(1.80)     | 14.79<br>(1.59)     | 14.92<br>(1.86)     | 14.25<br>(1.84)     | 12.15 | 10.78 | 12.48 | 12.89 | 0.04<br>(0.96)  | -1.01<br>(0.33) | 3.25<br>(0.00)  | 0.08<br>(3.76)  | 0.79<br>(3.79)  | -3.90<br>(5.65)  | 2.80<br>(2.44) | 2.97<br>(2.40) | 5.05<br>(4.61) | 0.94 | 0.95 | 0.90 | 0.94 (0.86-0.97) | 0.95 (0.89-0.98) | 0.87 (0.59-0.95) |
| Right cerebellar white matter (ml)                   | 14.43<br>(1.70)     | 14.51<br>(1.69)     | 14.30<br>(1.73)     | 14.18<br>(2.31)     | 11.81 | 11.63 | 12.11 | 16.28 | -0.46<br>(0.65) | 1.27<br>(0.22)  | 0.66<br>(0.52)  | 0.52<br>(5.06)  | -0.97<br>(3.71) | -2.35<br>(11.31) | 3.26<br>(3.84) | 2.90<br>(2.45) | 7.00<br>(9.07) | 0.90 | 0.96 | 0.62 | 0.90 (0.78-0.96) | 0.96 (0.90-0.98) | 0.60 (0.25-0.81) |
| Left cerebellar gray matter (ml)                     | 49.83<br>(5.56)     | 49.69<br>(5.59)     | 49.71<br>(5.55)     | 50.35<br>(5.62)     | 11.17 | 11.26 | 11.17 | 11.15 | 1.11<br>(0.28)  | 1.37<br>(0.19)  | -4.32<br>(0.00) | -0.29<br>(1.19) | -0.24<br>(0.79) | 1.04<br>(1.08)   | 0.90<br>(0.50) | 0.65<br>(0.87) | 1.21<br>(0.87) | 0.99 | 1.00 | 1.00 | 0.99 (0.99-1.00) | 1.00 (0.99-1.00) | 0.99 (0.93-1.00) |
| Right cerebellar gray matter (ml)                    | 50.14<br>(5.92)     | 49.93<br>(5.86)     | 49.65<br>(5.78)     | 50.49<br>(5.98)     | 11.81 | 11.73 | 11.65 | 11.85 | 1.40<br>(0.18)  | 1.42<br>(0.17)  | -1.29<br>(0.21) | -0.41<br>(1.33) | -0.96<br>(3.12) | 0.71<br>(2.71)   | 1.18<br>(0.69) | 1.60<br>(2.83) | 1.89<br>(2.03) | 0.99 | 0.96 | 0.98 | 0.99 (0.98-1.00) | 0.96 (0.91-0.98) | 0.98 (0.94-0.99) |
| Intracranial volume (ml)                             | 1527.80<br>(236.78) | 1527.88<br>(238.30) | 1523.00<br>(238.59) | 1540.39<br>(226.30) | 15.50 | 15.60 | 15.67 | 14.69 | -0.04<br>(0.97) | 3.30<br>(0.00)  | -2.42<br>(0.02) | -0.01<br>(0.74) | -0.33<br>(0.48) | 0.93<br>(1.77)   | 0.38<br>(0.63) | 0.39<br>(0.44) | 1.01<br>(1.72) | 1.00 | 1.00 | 1.00 | 1.00 (1.00-1.00) | 1.00 (1.00-1.00) | 0.99 (0.98-1.00) |
| Total brain volume without ventricles (ml)           | 987.57<br>(128.07)  | 988.90<br>(130.25)  | 987.85<br>(127.59)  | 989.36<br>(129.17)  | 12.97 | 13.17 | 12.92 | 13.06 | -1.50<br>(0.15) | -0.23<br>(0.82) | -1.92<br>(0.07) | 0.11<br>(0.40)  | 0.03<br>(0.61)  | 0.17<br>(0.44)   | 0.31<br>(0.26) | 0.45<br>(0.41) | 0.36<br>(0.29) | 1.00 | 1.00 | 1.00 | 1.00 (1.00-1.00) | 1.00 (1.00-1.00) | 1.00 (1.00-1.00) |

Abbreviations: SD = standard deviation; Orig = original scan; FS df = FreeSurfer defacing; FSL df = FSL defacing; FM = Face Masking; t = t-statistic; p=p-value; PD = Average Percentage Difference; CI = Confidence Interval.

**Table S5. Effects of de-identification on brain measures in older adults without cognitive impairment.**

| Brain metric                          | Mean (SD)        |                  |                  |                  | Coefficient of Variation |       |        |       | Paired t-test t(p) |                 |                 | Signed PD in %   |                  |                  | Absolute PD (%)  |                  |                  | Pearson's r |        |      | ICC (95% CI)     |                  |                  |
|---------------------------------------|------------------|------------------|------------------|------------------|--------------------------|-------|--------|-------|--------------------|-----------------|-----------------|------------------|------------------|------------------|------------------|------------------|------------------|-------------|--------|------|------------------|------------------|------------------|
|                                       | Orig             | FS df            | FSL df           | FM               | Orig                     | FS df | FSL df | FM    | FS df              | FSL df          | FM              | FS df            | FSL df           | FM               | FS df            | FSL df           | FM               | FS df       | FSL df | FM   | FS df            | FSL df           | FM               |
| <b>Subcortical volume (ml)</b>        |                  |                  |                  |                  |                          |       |        |       |                    |                 |                 |                  |                  |                  |                  |                  |                  |             |        |      |                  |                  |                  |
| Left thalamus                         | 6.47<br>(0.63)   | 6.48<br>(0.61)   | 6.56<br>(0.59)   | 6.49<br>(0.66)   | 9.73                     | 9.37  | 9.00   | 10.14 | -0.44<br>(0.67)    | -2.27<br>(0.03) | -0.53<br>(0.60) | 0.18<br>(1.64)   | 1.36<br>(2.68)   | 0.28<br>(2.72)   | 1.44<br>(0.74)   | 2.18<br>(2.03)   | 2.32<br>(1.34)   | 0.99        | 0.96   | 0.96 | 0.99 (0.97-0.99) | 0.95 (0.88-0.98) | 0.96 (0.92-0.99) |
| Left caudatus                         | 3.10<br>(0.31)   | 3.09<br>(0.32)   | 3.10<br>(0.31)   | 3.13<br>(0.31)   | 10.13                    | 10.24 | 10.15  | 10.01 | 0.67<br>(0.51)     | 0.28<br>(0.78)  | -1.54<br>(0.14) | -0.36<br>(2.35)  | -0.13<br>(2.17)  | 0.85<br>(2.59)   | 1.87<br>(1.41)   | 1.71<br>(1.29)   | 2.07<br>(1.73)   | 0.97        | 0.98   | 0.97 | 0.97 (0.94-0.99) | 0.98 (0.95-0.99) | 0.97 (0.92-0.99) |
| Left putamen                          | 4.27<br>(0.41)   | 4.28<br>(0.39)   | 4.24<br>(0.40)   | 4.27<br>(0.36)   | 9.55                     | 9.02  | 9.40   | 8.45  | -0.23<br>(0.82)    | 1.65<br>(0.11)  | 0.18<br>(0.86)  | 0.15<br>(1.78)   | -0.76<br>(2.13)  | -0.02<br>(3.17)  | 1.36<br>(1.12)   | 1.64<br>(1.52)   | 1.96<br>(2.46)   | 0.98        | 0.98   | 0.95 | 0.98 (0.95-0.99) | 0.97 (0.93-0.99) | 0.95 (0.88-0.98) |
| Left pallidum                         | 1.92<br>(0.18)   | 1.94<br>(0.19)   | 1.93<br>(0.18)   | 1.90<br>(0.18)   | 9.18                     | 9.91  | 9.52   | 9.66  | -1.71<br>(0.10)    | -0.84<br>(0.41) | 1.62<br>(0.12)  | 1.02<br>(2.89)   | 0.59<br>(3.41)   | -1.06<br>(2.89)  | 2.67<br>(1.39)   | 2.49<br>(2.34)   | 2.30<br>(1.98)   | 0.96        | 0.93   | 0.96 | 0.95 (0.88-0.98) | 0.93 (0.85-0.97) | 0.95 (0.88-0.98) |
| Left hippocampus                      | 3.66<br>(0.42)   | 3.62<br>(0.42)   | 3.65<br>(0.43)   | 3.64<br>(0.41)   | 11.43                    | 11.47 | 11.74  | 11.29 | 2.25<br>(0.04)     | 0.66<br>(0.51)  | 0.95<br>(0.35)  | -0.90<br>(1.84)  | -0.36<br>(2.14)  | -0.44<br>(2.21)  | 1.55<br>(1.31)   | 1.45<br>(1.59)   | 1.70<br>(1.43)   | 0.99        | 0.98   | 0.98 | 0.98 (0.96-0.99) | 0.98 (0.95-0.99) | 0.98 (0.96-0.99) |
| Left amygdala                         | 1.51<br>(0.22)   | 1.49<br>(0.22)   | 1.50<br>(0.22)   | 1.45<br>(0.22)   | 14.50                    | 14.52 | 14.89  | 15.50 | 1.43<br>(0.17)     | 1.02<br>(0.32)  | 4.08<br>(0.00)  | -1.14<br>(3.68)  | -0.64<br>(2.71)  | -3.86<br>(4.39)  | 2.91<br>(2.46)   | 2.22<br>(1.62)   | 4.27<br>(3.97)   | 0.97        | 0.98   | 0.96 | 0.97 (0.92-0.99) | 0.98 (0.96-0.99) | 0.93 (0.64-0.98) |
| Left accumbens                        | 0.38<br>(0.07)   | 0.37<br>(0.06)   | 0.38<br>(0.07)   | 0.39<br>(0.06)   | 18.46                    | 16.66 | 18.08  | 14.31 | 1.07<br>(0.30)     | -0.24<br>(0.81) | -1.16<br>(0.26) | -1.98<br>(9.67)  | 0.58<br>(10.01)  | 2.68<br>(8.51)   | 7.22<br>(6.55)   | 8.10<br>(5.62)   | 6.52<br>(5.94)   | 0.86        | 0.85   | 0.90 | 0.86 (0.68-0.94) | 0.85 (0.67-0.94) | 0.88 (0.73-0.95) |
| Right thalamus                        | 6.25<br>(0.55)   | 6.28<br>(0.53)   | 6.23<br>(0.49)   | 6.24<br>(0.56)   | 8.73                     | 8.36  | 7.89   | 8.99  | -1.08<br>(0.29)    | 0.49<br>(0.63)  | 0.17<br>(0.86)  | 0.52<br>(2.07)   | -0.23<br>(2.85)  | -0.12<br>(2.47)  | 1.69<br>(1.25)   | 2.29<br>(1.64)   | 1.99<br>(1.41)   | 0.97        | 0.95   | 0.96 | 0.97 (0.93-0.99) | 0.95 (0.88-0.98) | 0.97 (0.92-0.99) |
| Right caudatus                        | 3.27<br>(0.35)   | 3.25<br>(0.31)   | 3.24<br>(0.32)   | 3.26<br>(0.35)   | 10.84                    | 9.56  | 10.03  | 10.84 | 0.67<br>(0.51)     | 1.63<br>(0.12)  | 0.32<br>(0.76)  | -0.39<br>(3.38)  | -0.85<br>(2.43)  | -0.32<br>(4.38)  | 2.48<br>(2.26)   | 1.69<br>(1.91)   | 2.89<br>(3.25)   | 0.95        | 0.97   | 0.91 | 0.94 (0.87-0.98) | 0.97 (0.92-0.99) | 0.91 (0.80-0.96) |
| Right putamen                         | 4.31<br>(0.37)   | 4.34<br>(0.36)   | 4.34<br>(0.35)   | 4.30<br>(0.41)   | 8.56                     | 8.35  | 8.13   | 9.63  | -1.32<br>(0.20)    | -1.49<br>(0.15) | 0.36<br>(0.72)  | 0.74<br>(2.57)   | 0.85<br>(2.56)   | -0.37<br>(3.70)  | 1.95<br>(1.78)   | 1.64<br>(2.12)   | 2.19<br>(2.96)   | 0.96        | 0.96   | 0.94 | 0.95 (0.89-0.98) | 0.95 (0.88-0.98) | 0.93 (0.84-0.97) |
| Right pallidum                        | 1.84<br>(0.21)   | 1.85<br>(0.19)   | 1.85<br>(0.21)   | 1.84<br>(0.23)   | 11.39                    | 10.18 | 11.50  | 12.31 | -0.31<br>(0.76)    | -0.36<br>(0.72) | -0.05<br>(0.96) | 0.40<br>(4.17)   | 0.29<br>(3.66)   | -0.06<br>(4.24)  | 2.84<br>(3.02)   | 2.98<br>(2.03)   | 3.53<br>(2.21)   | 0.94        | 0.95   | 0.94 | 0.94 (0.85-0.97) | 0.95 (0.88-0.98) | 0.94 (0.85-0.97) |
| Right hippocampus                     | 3.78<br>(0.47)   | 3.78<br>(0.48)   | 3.80<br>(0.46)   | 3.80<br>(0.45)   | 12.49                    | 12.68 | 12.04  | 11.97 | 0.50<br>(0.62)     | -0.93<br>(0.36) | -0.88<br>(0.39) | -0.22<br>(1.70)  | 0.46<br>(1.97)   | 0.39<br>(1.66)   | 1.29<br>(1.09)   | 1.55<br>(1.26)   | 1.42<br>(0.90)   | 0.99        | 0.99   | 0.99 | 0.99 (0.98-1.00) | 0.99 (0.97-0.99) | 0.99 (0.98-1.00) |
| Right amygdala                        | 1.72<br>(0.19)   | 1.72<br>(0.20)   | 1.73<br>(0.20)   | 1.69<br>(0.19)   | 10.97                    | 11.56 | 11.32  | 11.46 | -0.49<br>(0.63)    | -1.87<br>(0.08) | 1.47<br>(0.16)  | 0.37<br>(4.15)   | 1.01<br>(2.47)   | -1.26<br>(3.81)  | 3.02<br>(2.80)   | 2.22<br>(1.41)   | 3.08<br>(2.49)   | 0.93        | 0.97   | 0.94 | 0.93 (0.84-0.97) | 0.97 (0.92-0.99) | 0.94 (0.86-0.98) |
| Right accumbens                       | 0.47<br>(0.07)   | 0.46<br>(0.07)   | 0.48<br>(0.07)   | 0.48<br>(0.06)   | 15.26                    | 15.53 | 15.45  | 12.34 | 1.68<br>(0.11)     | -1.75<br>(0.10) | -1.22<br>(0.24) | -2.26<br>(6.71)  | 2.22<br>(6.18)   | 2.35<br>(8.08)   | 5.82<br>(3.86)   | 5.16<br>(3.91)   | 6.60<br>(5.04)   | 0.92        | 0.93   | 0.87 | 0.91 (0.80-0.96) | 0.92 (0.82-0.97) | 0.86 (0.68-0.94) |
| <b>Ventricular volume (ml)</b>        |                  |                  |                  |                  |                          |       |        |       |                    |                 |                 |                  |                  |                  |                  |                  |                  |             |        |      |                  |                  |                  |
| Third ventricle                       | 1.74<br>(0.76)   | 1.74<br>(0.77)   | 1.73<br>(0.76)   | 1.74<br>(0.76)   | 43.66                    | 43.97 | 43.92  | 43.41 | -0.78<br>(0.44)    | 1.53<br>(0.14)  | -0.19<br>(0.85) | 0.13<br>(2.02)   | -0.70<br>(1.79)  | 0.25<br>(3.34)   | 1.50<br>(1.32)   | 1.58<br>(1.05)   | 2.46<br>(2.22)   | 1.00        | 1.00   | 1.00 | 1.00 (1.00-1.00) | 1.00 (1.00-1.00) | 1.00 (0.99-1.00) |
| Left lateral ventricle                | 19.10<br>(10.03) | 19.10<br>(10.10) | 19.13<br>(10.06) | 19.09<br>(10.08) | 52.51                    | 52.87 | 52.57  | 52.80 | 0.08<br>(0.93)     | -0.86<br>(0.40) | 0.41<br>(0.69)  | -0.19<br>(0.92)  | 0.10<br>(0.70)   | -0.19<br>(0.71)  | 0.64<br>(0.68)   | 0.57<br>(0.41)   | 0.59<br>(0.42)   | 1.00        | 1.00   | 1.00 | 1.00 (1.00-1.00) | 1.00 (1.00-1.00) | 1.00 (1.00-1.00) |
| Left inferior lateral ventricle       | 0.62<br>(0.43)   | 0.61<br>(0.43)   | 0.62<br>(0.42)   | 0.60<br>(0.41)   | 69.20                    | 70.22 | 68.43  | 68.67 | 0.58<br>(0.57)     | 0.21<br>(0.83)  | 1.38<br>(0.18)  | -2.29<br>(17.43) | -0.57<br>(16.52) | -4.89<br>(16.32) | 11.86<br>(12.71) | 10.44<br>(12.61) | 10.59<br>(13.18) | 0.99        | 0.99   | 0.99 | 0.99 (0.97-1.00) | 0.99 (0.98-1.00) | 0.99 (0.97-0.99) |
| Right lateral ventricle               | 16.15<br>(7.85)  | 16.14<br>(7.85)  | 16.17<br>(7.91)  | 16.15<br>(7.90)  | 48.60                    | 48.64 | 48.90  | 48.88 | 0.48<br>(0.64)     | -0.84<br>(0.41) | -0.17<br>(0.87) | -0.13<br>(1.04)  | -0.03<br>(0.64)  | -0.12<br>(1.01)  | 0.60<br>(0.85)   | 0.49<br>(0.40)   | 0.77<br>(0.64)   | 1.00        | 1.00   | 1.00 | 1.00 (1.00-1.00) | 1.00 (1.00-1.00) | 1.00 (1.00-1.00) |
| Right inferior lateral ventricle      | 0.56<br>(0.35)   | 0.57<br>(0.36)   | 0.56<br>(0.36)   | 0.56<br>(0.36)   | 62.94                    | 62.73 | 63.24  | 63.50 | -0.95<br>(0.35)    | -0.11<br>(0.91) | 0.04<br>(0.97)  | 2.00<br>(8.94)   | -0.35<br>(12.78) | -0.82<br>(10.26) | 6.14<br>(6.67)   | 8.57<br>(9.29)   | 7.17<br>(7.22)   | 1.00        | 0.99   | 0.99 | 1.00 (0.99-1.00) | 0.99 (0.98-1.00) | 0.99 (0.99-1.00) |
| <b>Local cortical volume (ml)</b>     |                  |                  |                  |                  |                          |       |        |       |                    |                 |                 |                  |                  |                  |                  |                  |                  |             |        |      |                  |                  |                  |
| Left banks superior temporal sulcus   | 2.16<br>(0.25)   | 2.11<br>(0.24)   | 2.13<br>(0.26)   | 2.17<br>(0.27)   | 11.51                    | 11.56 | 12.16  | 12.28 | 1.76<br>(0.09)     | 1.64<br>(0.12)  | -0.57<br>(0.57) | -2.32<br>(6.43)  | -1.43<br>(4.18)  | 0.40<br>(4.16)   | 4.14<br>(5.39)   | 3.12<br>(3.08)   | 3.14<br>(2.67)   | 0.86        | 0.95   | 0.94 | 0.85 (0.66-0.94) | 0.95 (0.87-0.98) | 0.94 (0.87-0.98) |
| Left caudal anterior cingulate cortex | 1.49<br>(0.38)   | 1.49<br>(0.39)   | 1.49<br>(0.41)   | 1.51<br>(0.38)   | 25.49                    | 26.39 | 27.32  | 25.35 | 0.42<br>(0.68)     | 0.29<br>(0.77)  | -1.95<br>(0.06) | -0.66<br>(4.85)  | -0.77<br>(6.36)  | 1.39<br>(3.60)   | 3.38<br>(3.46)   | 3.77<br>(5.12)   | 2.83<br>(2.56)   | 0.99        | 0.98   | 0.99 | 0.99 (0.97-1.00) | 0.98 (0.95-0.99) | 0.99 (0.98-1.00) |
| Left caudal middle frontal gyrus      | 5.50<br>(0.85)   | 5.49<br>(0.86)   | 5.49<br>(0.88)   | 5.51<br>(0.88)   | 15.51                    | 15.68 | 16.00  | 16.04 | 0.62<br>(0.54)     | 0.53<br>(0.60)  | -0.09<br>(0.93) | -0.29<br>(2.03)  | -0.35<br>(2.32)  | -0.04<br>(2.39)  | 1.55<br>(1.30)   | 1.71<br>(1.56)   | 1.98<br>(1.26)   | 0.99        | 0.99   | 0.99 | 0.99 (0.98-1.00) | 0.99 (0.98-1.00) | 0.99 (0.97-1.00) |
| Left cuneus                           | 2.70<br>(0.44)   | 2.73<br>(0.44)   | 2.74<br>(0.43)   | 2.75<br>(0.45)   | 16.34                    | 16.02 | 15.50  | 16.23 | -1.37<br>(0.19)    | -1.29<br>(0.21) | -0.98<br>(0.34) | 0.88<br>(2.93)   | 1.60<br>(5.63)   | 1.55<br>(7.52)   | 2.09<br>(2.20)   | 2.93<br>(5.03)   | 3.05<br>(7.02)   | 0.98        | 0.95   | 0.90 | 0.98 (0.96-0.99) | 0.94 (0.87-0.98) | 0.90 (0.77-0.96) |
| Left entorhinal cortex                | 2.01<br>(0.47)   | 2.01<br>(0.43)   | 1.98<br>(0.44)   | 2.03<br>(0.44)   | 23.42                    | 21.45 | 22.30  | 21.63 | -0.04<br>(0.97)    | 1.26<br>(0.22)  | -0.68<br>(0.51) | 0.31<br>(9.04)   | -1.14<br>(4.75)  | 1.34<br>(7.25)   | 7.48<br>(4.81)   | 3.71<br>(3.07)   | 5.43<br>(4.84)   | 0.93        | 0.98   | 0.96 | 0.93 (0.84-0.97) | 0.98 (0.95-0.99) | 0.96 (0.90-0.98) |
| Left fusiform gyrus                   | 8.90<br>(1.00)   | 8.84<br>(1.01)   | 8.85<br>(0.97)   | 8.84<br>(1.04)   | 11.27                    | 11.46 | 10.98  | 11.72 | 1.06<br>(0.30)     | 1.10<br>(0.29)  | 1.41<br>(0.17)  | -0.69<br>(2.84)  | -0.59<br>(2.57)  | -0.74<br>(2.18)  | 2.20<br>(1.86)   | 2.09<br>(1.54)   | 1.93<br>(1.19)   | 0.97        | 0.97   | 0.98 | 0.97 (0.92-0.99) | 0.97 (0.93-0.99) | 0.98 (0.95-0.99) |
| Left inferior parietal cortex         | 10.29<br>(1.28)  | 10.07<br>(1.47)  | 10.26<br>(1.34)  | 10.30<br>(1.34)  | 12.46                    | 14.64 | 13.07  | 13.05 | 1.47<br>(0.16)     | 0.70<br>(0.49)  | -0.25<br>(0.81) | -2.50<br>(8.10)  | -0.37<br>(1.92)  | 0.04<br>(1.90)   | 3.55<br>(7.67)   | 1.55<br>(1.16)   | 1.32<br>(1.33)   | 0.89        | 0.99   | 0.99 | 0.87 (0.71-0.95) | 0.99 (0.97-1.00) | 0.99 (0.97-1.00) |
| Left inferior temporal gyrus          | 10.16<br>(1.22)  | 10.09<br>(1.29)  | 10.15<br>(1.31)  | 10.18<br>(1.25)  | 11.99                    | 12.83 | 12.93  | 12.29 | 1.85<br>(0.08)     | 0.24<br>(0.81)  | -0.53<br>(0.60) | -0.85<br>(1.81)  | -0.22<br>(2.18)  | 0.20<br>(2.09)   | 1.47<br>(1.33)   | 1.72<br>(1.30)   | 1.31<br>(1.61)   | 0.99        | 0.99   | 0.99 | 0.99 (0.97-1.00) | 0.99 (0.96-0.99) | 0.99 (0.97-1.00) |
| Left isthmus cingulate cortex         | 2.32<br>(0.28)   | 2.30<br>(0.28)   | 2.28<br>(0.31)   | 2.31<br>(0.31)   | 12.08                    | 12.18 | 13.59  | 13.61 | 0.44<br>(0.66)     | 1.72<br>(0.10)  | 0.50<br>(0.63)  | -0.56<br>(6.07)  | -1.72<br>(4.23)  | -0.62<br>(3.97)  | 4.21<br>(4.32)   | 3.45<br>(2.92)   | 2.87<br>(2.74)   | 0.88        | 0.96   | 0.97 | 0.88 (0.74-0.95) | 0.95 (0.87-0.98) | 0.96 (0.91-0.98) |
| Left lateral occipital cortex         | 10.77<br>(1.37)  | 10.88<br>(1.37)  | 10.77<br>(1.38)  | 10.84<br>(1.34)  | 12.68                    | 12.55 | 12.82  | 12.36 | -1.42<br>(0.17)    | -0.02<br>(0.99) | -1.15<br>(0.26) | 1.05<br>(3.53)   | 0.00<br>(2.89)   | 0.64<br>(2.56)   | 2.11<br>(3.00)   | 1.96<br>(2.08)   | 1.85<br>(1.85)   | 0.97        | 0.98   | 0.98 | 0.96 (0.91-0.99) | 0.98 (0.95-0.99) | 0.98 (0.96-0.99) |
| Left lateral orbitofrontal cortex     | 6.87<br>(0.59)   | 6.84<br>(0.64)   | 6.83<br>(0.61)   | 6.86<br>(0.64)   | 8.55                     | 9.39  | 8.87   | 9.30  | 0.87<br>(0.40)     | 1.62<br>(0.12)  | 0.13<br>(0.90)  | -0.46<br>(2.06)  | -0.52<br>(1.47)  | -0.13<br>(2.15)  | 1.65<br>(1.27)   | 1.15<br>(1.03)   | 1.63<br>(1.36)   | 0.98        | 0.99   | 0.98 | 0.97 (0.94-0.99) | 0.99 (0.97-0.99) | 0.97 (0.94-0.99) |
| Left lingual gyrus                    | 6.05<br>(0.70)   | 6.10<br>(0.68)   | 6.05<br>(0.72)   | 6.09<br>(0.72)   | 11.56                    | 11.18 | 11.94  | 11.84 | -1.23<br>(0.23)    | -0.25<br>(0.80) | -2.34<br>(0.03) | 0.93<br>(3.60)   | 0.05<br>(1.14)   | 0.59<br>(1.14)   | 2.03<br>(3.09)   | 1.31<br>(0.87)   | 0.95<br>(0.85)   | 0.96        | 0.99   | 1.00 | 0.96 (0.90-0.98) | 0.99 (0.98-1.00) | 0.99 (0.98-1.00) |
| Left medial orbitofrontal cortex      | 4.65<br>(0.58)   | 4.59<br>(0.56)   | 4.53<br>(0.60)   | 4.68<br>(0.59)   | 12.42                    | 12.20 | 13.18  | 12.65 | 1.10<br>(0.28)     | 2.35<br>(0.03)  | -0.72<br>(0.48) | -1.19<br>(5.35)  | -2.51<br>(4.71)  | 0.63<br>(4.25)   | 4.11<br>(3.52)   | 4.25<br>(3.14)   | 3.53<br>(2.32)   | 0.92        | 0.93   | 0.94 | 0.91 (0.80-0.96) | 0.92 (0.78-0.97) | 0.94 (0.87-0.98) |



|                                        |                 |                 |                 |                 |       |       |       |       |                 |                 |                 |                 |                  |                 |                 |                |                |      |      |      |                   |                  |                  |
|----------------------------------------|-----------------|-----------------|-----------------|-----------------|-------|-------|-------|-------|-----------------|-----------------|-----------------|-----------------|------------------|-----------------|-----------------|----------------|----------------|------|------|------|-------------------|------------------|------------------|
| Left middle temporal gyrus             | 9.82<br>(1.01)  | 9.83<br>(1.13)  | 9.82<br>(1.06)  | 9.81<br>(1.04)  | 10.32 | 11.52 | 10.83 | 10.65 | -0.12<br>(0.91) | -0.03<br>(0.98) | 0.28<br>(0.78)  | -0.02<br>(4.18) | -0.03<br>(2.04)  | -0.13<br>(1.68) | 2.19<br>(3.52)  | 1.50<br>(1.34) | 1.27<br>(1.08) | 0.94 | 0.98 | 0.99 | 0.94 (0.86-0.98)  | 0.98 (0.96-0.99) | 0.99 (0.97-0.99) |
| Left parahippocampal gyrus             | 2.01<br>(0.34)  | 2.00<br>(0.37)  | 2.01<br>(0.37)  | 2.02<br>(0.40)  | 16.72 | 18.66 | 18.28 | 19.87 | 0.27<br>(0.79)  | -0.45<br>(0.66) | -0.66<br>(0.51) | -0.57<br>(4.53) | 0.13<br>(3.56)   | 0.33<br>(5.14)  | 3.24<br>(3.13)  | 3.03<br>(1.75) | 4.01<br>(3.12) | 0.97 | 0.98 | 0.97 | 0.97 (0.93-0.99)  | 0.98 (0.95-0.99) | 0.96 (0.89-0.98) |
| Left paracentral lobule                | 3.32<br>(0.46)  | 3.31<br>(0.49)  | 3.32<br>(0.49)  | 3.30<br>(0.47)  | 13.82 | 14.97 | 14.76 | 14.34 | 0.34<br>(0.74)  | -0.27<br>(0.79) | 0.73<br>(0.48)  | -0.39<br>(3.55) | 0.12<br>(3.37)   | -0.52<br>(2.84) | 2.92<br>(1.95)  | 2.66<br>(1.98) | 2.48<br>(1.36) | 0.97 | 0.97 | 0.98 | 0.97 (0.92-0.99)  | 0.97 (0.93-0.99) | 0.98 (0.95-0.99) |
| Left pars opercularis                  | 4.03<br>(0.54)  | 4.06<br>(0.57)  | 4.05<br>(0.57)  | 4.07<br>(0.54)  | 13.46 | 14.14 | 14.12 | 13.18 | -0.73<br>(0.48) | -0.43<br>(0.67) | -1.14<br>(0.27) | 0.66<br>(4.11)  | 0.16<br>(2.88)   | 0.80<br>(2.89)  | 2.91<br>(2.90)  | 2.29<br>(1.68) | 2.33<br>(1.82) | 0.95 | 0.98 | 0.97 | 0.95 (0.88-0.98)  | 0.98 (0.95-0.99) | 0.97 (0.94-0.99) |
| Left pars orbitalis                    | 2.17<br>(0.27)  | 2.19<br>(0.30)  | 2.20<br>(0.29)  | 2.19<br>(0.27)  | 12.57 | 13.65 | 13.25 | 12.31 | -0.63<br>(0.54) | -1.58<br>(0.13) | -0.85<br>(0.40) | 0.47<br>(4.38)  | 1.04<br>(3.26)   | 0.72<br>(3.78)  | 3.44<br>(2.65)  | 2.68<br>(2.05) | 2.77<br>(2.61) | 0.95 | 0.97 | 0.95 | 0.95 (0.87-0.98)  | 0.97 (0.92-0.99) | 0.96 (0.89-0.98) |
| Left pars triangularis                 | 3.20<br>(0.51)  | 3.18<br>(0.52)  | 3.17<br>(0.50)  | 3.20<br>(0.50)  | 15.94 | 16.25 | 15.66 | 15.69 | 0.89<br>(0.38)  | 1.83<br>(0.08)  | -0.08<br>(0.94) | -0.62<br>(3.12) | -0.81<br>(2.21)  | 0.10<br>(3.72)  | 2.46<br>(1.95)  | 1.75<br>(1.53) | 3.08<br>(1.98) | 0.98 | 0.99 | 0.97 | 0.98 (0.96-0.99)  | 0.99 (0.97-1.00) | 0.97 (0.94-0.99) |
| Left pericalcarine cortex              | 1.90<br>(0.26)  | 1.98<br>(0.35)  | 1.89<br>(0.26)  | 1.91<br>(0.25)  | 13.55 | 17.90 | 13.78 | 13.26 | -0.92<br>(0.37) | 1.11<br>(0.28)  | -0.62<br>(0.54) | 3.45<br>(17.11) | -0.78<br>(3.16)  | 0.50<br>(3.35)  | 6.14<br>(16.30) | 2.75<br>(1.64) | 2.64<br>(2.05) | 0.21 | 0.97 | 0.97 | 0.20 (-0.24-0.58) | 0.97 (0.94-0.99) | 0.97 (0.92-0.99) |
| Left postcentral gyrus                 | 8.51<br>(1.17)  | 8.49<br>(1.18)  | 8.49<br>(1.17)  | 8.52<br>(1.17)  | 13.72 | 13.89 | 13.78 | 13.75 | 0.31<br>(0.76)  | 0.78<br>(0.44)  | -0.37<br>(0.71) | -0.23<br>(3.17) | -0.24<br>(1.36)  | 0.15<br>(1.87)  | 1.88<br>(2.52)  | 1.01<br>(0.91) | 1.46<br>(1.13) | 0.98 | 1.00 | 0.99 | 0.98 (0.95-0.99)  | 1.00 (0.99-1.00) | 0.99 (0.98-1.00) |
| Left posterior cingulate cortex        | 2.77<br>(0.33)  | 2.74<br>(0.34)  | 2.73<br>(0.33)  | 2.80<br>(0.35)  | 11.77 | 12.52 | 11.93 | 12.35 | 0.95<br>(0.36)  | 1.61<br>(0.12)  | -0.81<br>(0.43) | -1.15<br>(5.01) | -1.68<br>(4.45)  | 0.81<br>(4.63)  | 3.89<br>(3.26)  | 3.52<br>(3.12) | 3.74<br>(2.74) | 0.91 | 0.92 | 0.92 | 0.91 (0.80-0.96)  | 0.92 (0.80-0.97) | 0.92 (0.81-0.96) |
| Left precentral gyrus                  | 12.55<br>(1.50) | 12.55<br>(1.46) | 12.58<br>(1.49) | 12.56<br>(1.51) | 11.92 | 11.68 | 11.81 | 12.03 | 0.08<br>(0.94)  | -0.55<br>(0.59) | -0.12<br>(0.90) | 0.01<br>(1.64)  | 0.22<br>(1.63)   | 0.05<br>(1.97)  | 1.37<br>(0.85)  | 1.32<br>(0.95) | 1.54<br>(1.18) | 0.99 | 0.99 | 0.99 | 0.99 (0.98-1.00)  | 0.99 (0.98-1.00) | 0.99 (0.97-0.99) |
| Left precuneus                         | 8.45<br>(0.90)  | 8.38<br>(0.99)  | 8.43<br>(0.96)  | 8.43<br>(0.95)  | 10.66 | 11.87 | 11.35 | 11.32 | 1.18<br>(0.25)  | 0.41<br>(0.69)  | 0.43<br>(0.67)  | -0.86<br>(3.06) | -0.24<br>(1.98)  | -0.26<br>(2.18) | 1.96<br>(2.47)  | 1.36<br>(1.43) | 1.57<br>(1.49) | 0.97 | 0.99 | 0.98 | 0.97 (0.92-0.99)  | 0.98 (0.96-0.99) | 0.98 (0.96-0.99) |
| Left rostral anterior cingulate cortex | 2.39<br>(0.45)  | 2.36<br>(0.41)  | 2.37<br>(0.47)  | 2.38<br>(0.46)  | 18.98 | 17.51 | 19.61 | 19.35 | 1.38<br>(0.18)  | 1.25<br>(0.23)  | 0.68<br>(0.50)  | -0.91<br>(4.54) | -0.90<br>(3.05)  | -0.72<br>(4.10) | 3.46<br>(2.99)  | 2.53<br>(1.84) | 3.23<br>(2.53) | 0.98 | 0.99 | 0.98 | 0.97 (0.94-0.99)  | 0.99 (0.97-1.00) | 0.98 (0.95-0.99) |
| Left rostral middle frontal gyrus      | 13.40<br>(1.58) | 13.32<br>(1.74) | 13.41<br>(1.62) | 13.40<br>(1.59) | 11.76 | 13.04 | 12.08 | 11.88 | 0.89<br>(0.38)  | -0.06<br>(0.95) | 0.06<br>(0.95)  | -0.78<br>(3.52) | -0.01<br>(2.16)  | -0.05<br>(2.21) | 2.16<br>(2.85)  | 1.85<br>(1.03) | 1.80<br>(1.23) | 0.97 | 0.98 | 0.98 | 0.97 (0.92-0.99)  | 0.98 (0.96-0.99) | 0.98 (0.96-0.99) |
| Left superior frontal gyrus            | 20.14<br>(2.46) | 20.04<br>(2.53) | 20.13<br>(2.55) | 20.12<br>(2.50) | 12.20 | 12.65 | 12.68 | 12.44 | 1.07<br>(0.30)  | 0.10<br>(0.92)  | 0.29<br>(0.78)  | -0.53<br>(2.14) | -0.09<br>(1.51)  | -0.13<br>(1.84) | 1.22<br>(1.82)  | 0.99<br>(1.12) | 1.24<br>(1.33) | 0.99 | 0.99 | 0.99 | 0.99 (0.97-0.99)  | 0.99 (0.99-1.00) | 0.99 (0.97-1.00) |
| Left superior parietal cortex          | 11.55<br>(1.43) | 11.47<br>(1.74) | 11.54<br>(1.42) | 11.59<br>(1.39) | 12.41 | 15.15 | 12.27 | 12.02 | 0.61<br>(0.55)  | 0.25<br>(0.81)  | -1.35<br>(0.19) | -1.15<br>(7.11) | -0.05<br>(1.44)  | 0.41<br>(1.25)  | 2.45<br>(6.76)  | 1.16<br>(0.82) | 1.01<br>(0.81) | 0.95 | 0.99 | 1.00 | 0.94 (0.85-0.97)  | 0.99 (0.99-1.00) | 0.99 (0.99-1.00) |
| Left superior temporal gyrus           | 11.17<br>(1.43) | 11.17<br>(1.48) | 11.18<br>(1.46) | 11.19<br>(1.47) | 12.82 | 13.25 | 13.10 | 13.14 | -0.17<br>(0.87) | -0.33<br>(0.75) | -0.59<br>(0.56) | 0.01<br>(1.75)  | 0.09<br>(1.82)   | 0.19<br>(1.80)  | 1.21<br>(1.23)  | 1.44<br>(1.07) | 1.35<br>(1.17) | 0.99 | 0.99 | 0.99 | 0.99 (0.98-1.00)  | 0.99 (0.98-1.00) | 0.99 (0.98-1.00) |
| Left supramarginal gyrus               | 10.06<br>(1.35) | 9.99<br>(1.50)  | 10.10<br>(1.43) | 10.07<br>(1.40) | 13.46 | 15.02 | 14.13 | 13.94 | 0.50<br>(0.62)  | -0.94<br>(0.36) | -0.18<br>(0.86) | -0.89<br>(6.60) | 0.35<br>(2.05)   | 0.02<br>(2.06)  | 2.97<br>(5.92)  | 1.54<br>(1.36) | 1.57<br>(1.30) | 0.91 | 0.99 | 0.99 | 0.91 (0.79-0.96)  | 0.99 (0.97-1.00) | 0.99 (0.97-1.00) |
| Left frontal pole                      | 0.88<br>(0.13)  | 0.88<br>(0.15)  | 0.89<br>(0.15)  | 0.88<br>(0.15)  | 14.71 | 17.35 | 16.39 | 16.84 | 0.10<br>(0.92)  | -0.78<br>(0.45) | -0.01<br>(0.99) | -0.58<br>(8.61) | 0.94<br>(7.68)   | -0.27<br>(6.38) | 6.69<br>(5.24)  | 6.24<br>(4.36) | 4.80<br>(4.08) | 0.87 | 0.89 | 0.93 | 0.86 (0.69-0.94)  | 0.89 (0.75-0.95) | 0.92 (0.82-0.97) |
| Left temporal pole                     | 2.44<br>(0.30)  | 2.38<br>(0.28)  | 2.49<br>(0.28)  | 2.42<br>(0.28)  | 12.41 | 11.74 | 11.20 | 11.36 | 1.64<br>(0.12)  | -1.41<br>(0.17) | 0.32<br>(0.76)  | -2.32<br>(6.59) | 2.45<br>(7.68)   | -0.51<br>(9.06) | 5.63<br>(3.97)  | 6.62<br>(4.38) | 6.98<br>(5.58) | 0.85 | 0.80 | 0.71 | 0.84 (0.64-0.93)  | 0.79 (0.56-0.91) | 0.72 (0.42-0.88) |
| Left transverse temporal gyrus         | 1.01<br>(0.18)  | 1.00<br>(0.18)  | 1.01<br>(0.19)  | 1.01<br>(0.18)  | 17.47 | 18.35 | 19.00 | 17.64 | 0.27<br>(0.79)  | -0.15<br>(0.89) | -0.41<br>(0.69) | -0.32<br>(3.86) | -0.11<br>(4.34)  | 0.34<br>(3.95)  | 2.85<br>(2.55)  | 3.40<br>(2.59) | 3.04<br>(2.45) | 0.98 | 0.98 | 0.98 | 0.98 (0.94-0.99)  | 0.97 (0.94-0.99) | 0.98 (0.94-0.99) |
| Left insula                            | 6.70<br>(0.66)  | 6.72<br>(0.66)  | 6.73<br>(0.63)  | 6.67<br>(0.61)  | 9.84  | 9.83  | 9.31  | 9.17  | -0.41<br>(0.69) | -0.58<br>(0.57) | 0.47<br>(0.64)  | 0.26<br>(3.06)  | 0.51<br>(3.62)   | -0.37<br>(4.15) | 2.35<br>(1.92)  | 2.53<br>(2.59) | 2.81<br>(3.02) | 0.95 | 0.93 | 0.91 | 0.95 (0.89-0.98)  | 0.93 (0.83-0.97) | 0.91 (0.79-0.96) |
| Right banks superior temporal sulcus   | 1.99<br>(0.30)  | 1.95<br>(0.34)  | 1.96<br>(0.27)  | 1.98<br>(0.31)  | 14.89 | 17.22 | 14.03 | 15.57 | 1.85<br>(0.08)  | 1.55<br>(0.14)  | 0.37<br>(0.72)  | -2.56<br>(6.23) | -1.49<br>(4.93)  | -0.39<br>(3.84) | 4.33<br>(5.10)  | 3.99<br>(3.16) | 3.07<br>(2.24) | 0.95 | 0.95 | 0.97 | 0.94 (0.85-0.97)  | 0.94 (0.86-0.98) | 0.97 (0.92-0.99) |
| Right caudal anterior cingulate cortex | 1.92<br>(0.40)  | 1.91<br>(0.42)  | 1.91<br>(0.39)  | 1.88<br>(0.37)  | 20.61 | 22.19 | 20.25 | 19.78 | 0.15<br>(0.88)  | 0.65<br>(0.52)  | 2.11<br>(0.05)  | -0.49<br>(3.88) | -0.48<br>(4.09)  | -1.73<br>(4.36) | 2.91<br>(2.54)  | 3.05<br>(2.67) | 3.32<br>(3.26) | 0.99 | 0.98 | 0.98 | 0.99 (0.96-0.99)  | 0.98 (0.95-0.99) | 0.98 (0.93-0.99) |
| Right caudal middle frontal gyrus      | 5.47<br>(0.90)  | 5.39<br>(0.99)  | 5.44<br>(0.95)  | 5.43<br>(0.93)  | 16.45 | 18.41 | 17.56 | 17.07 | 2.06<br>(0.05)  | 1.36<br>(0.19)  | 1.33<br>(0.20)  | -1.76<br>(3.83) | -0.81<br>(2.36)  | -0.76<br>(2.36) | 2.34<br>(3.49)  | 1.79<br>(1.70) | 2.08<br>(1.28) | 0.99 | 0.99 | 0.99 | 0.98 (0.95-0.99)  | 0.99 (0.98-1.00) | 0.99 (0.98-1.00) |
| Right cuneus                           | 2.94<br>(0.63)  | 3.07<br>(0.67)  | 2.98<br>(0.56)  | 3.02<br>(0.62)  | 21.47 | 21.95 | 18.90 | 20.66 | -1.47<br>(0.16) | -0.95<br>(0.35) | -1.85<br>(0.08) | 4.42<br>(13.49) | 2.11<br>(8.70)   | 2.96<br>(7.85)  | 6.06<br>(12.81) | 4.55<br>(7.66) | 4.22<br>(7.22) | 0.78 | 0.93 | 0.95 | 0.77 (0.52-0.90)  | 0.92 (0.82-0.97) | 0.94 (0.85-0.98) |
| Right entorhinal cortex                | 1.86<br>(0.41)  | 1.85<br>(0.38)  | 1.84<br>(0.42)  | 1.89<br>(0.43)  | 21.78 | 20.51 | 22.88 | 22.95 | 0.26<br>(0.80)  | 0.36<br>(0.72)  | -1.14<br>(0.27) | -0.26<br>(9.08) | -1.05<br>(10.08) | 1.50<br>(7.18)  | 7.56<br>(4.75)  | 7.87<br>(6.15) | 5.86<br>(4.22) | 0.91 | 0.88 | 0.95 | 0.92 (0.80-0.96)  | 0.88 (0.74-0.95) | 0.95 (0.88-0.98) |
| Right fusiform gyrus                   | 8.32<br>(1.00)  | 8.26<br>(1.08)  | 8.27<br>(0.95)  | 8.30<br>(0.95)  | 11.98 | 13.02 | 11.54 | 11.50 | 1.68<br>(0.11)  | 1.45<br>(0.16)  | 0.57<br>(0.58)  | -0.91<br>(2.32) | -0.52<br>(1.77)  | -0.22<br>(2.20) | 1.56<br>(1.91)  | 1.36<br>(1.22) | 1.74<br>(1.30) | 0.99 | 0.99 | 0.98 | 0.98 (0.96-0.99)  | 0.99 (0.97-1.00) | 0.98 (0.96-0.99) |
| Right inferior parietal cortex         | 11.98<br>(1.55) | 11.74<br>(1.74) | 11.83<br>(1.35) | 11.91<br>(1.59) | 12.95 | 14.79 | 11.40 | 13.35 | 1.62<br>(0.12)  | 1.79<br>(0.09)  | 1.08<br>(0.29)  | -2.39<br>(7.59) | -1.12<br>(3.06)  | -0.65<br>(2.66) | 3.38<br>(7.18)  | 2.20<br>(2.37) | 1.97<br>(1.85) | 0.92 | 0.97 | 0.98 | 0.91 (0.78-0.96)  | 0.96 (0.90-0.98) | 0.98 (0.96-0.99) |
| Right inferior temporal gyrus          | 9.93<br>(1.60)  | 9.84<br>(1.60)  | 9.86<br>(1.59)  | 9.90<br>(1.53)  | 16.15 | 16.29 | 16.09 | 15.48 | 2.01<br>(0.06)  | 1.51<br>(0.15)  | 0.70<br>(0.49)  | -0.95<br>(2.58) | -0.72<br>(2.21)  | -0.16<br>(1.78) | 1.85<br>(2.00)  | 1.72<br>(1.53) | 1.41<br>(1.06) | 0.99 | 0.99 | 0.99 | 0.99 (0.97-1.00)  | 0.99 (0.98-1.00) | 0.99 (0.99-1.00) |
| Right isthmus cingulate cortex         | 2.13<br>(0.29)  | 2.12<br>(0.30)  | 2.11<br>(0.32)  | 2.12<br>(0.33)  | 13.50 | 14.35 | 15.32 | 15.40 | 0.13<br>(0.90)  | 0.45<br>(0.65)  | 0.35<br>(0.73)  | -0.28<br>(6.13) | -1.06<br>(8.54)  | -0.85<br>(7.77) | 4.58<br>(3.96)  | 5.97<br>(6.06) | 5.79<br>(5.10) | 0.91 | 0.88 | 0.90 | 0.92 (0.80-0.97)  | 0.88 (0.72-0.95) | 0.90 (0.77-0.96) |
| Right lateral occipital cortex         | 11.16<br>(1.59) | 11.03<br>(1.83) | 11.11<br>(1.57) | 11.22<br>(1.64) | 14.20 | 16.63 | 14.15 | 14.59 | 0.92<br>(0.37)  | 0.62<br>(0.54)  | -0.87<br>(0.40) | -1.55<br>(7.07) | -0.48<br>(3.57)  | 0.42<br>(2.66)  | 3.11<br>(6.50)  | 1.99<br>(2.98) | 2.00<br>(1.75) | 0.94 | 0.97 | 0.98 | 0.93 (0.84-0.97)  | 0.97 (0.92-0.99) | 0.98 (0.96-0.99) |
| Right lateral orbitofrontal cortex     | 6.66<br>(0.67)  | 6.70<br>(0.77)  | 6.67<br>(0.70)  | 6.64<br>(0.72)  | 9.99  | 11.55 | 10.50 | 10.83 | -0.68<br>(0.50) | -0.34<br>(0.74) | 0.26<br>(0.80)  | 0.48<br>(4.02)  | 0.19<br>(3.08)   | -0.27<br>(3.26) | 2.92<br>(2.73)  | 2.22<br>(2.09) | 2.57<br>(1.95) | 0.93 | 0.95 | 0.95 | 0.93 (0.83-0.97)  | 0.96 (0.89-0.98) | 0.95 (0.89-0.98) |
| Right lingual gyrus                    | 6.54<br>(0.89)  | 6.60<br>(0.88)  | 6.55<br>(0.87)  | 6.57<br>(0.88)  | 13.67 | 13.32 | 13.34 | 13.39 | -1.09<br>(0.29) | -0.20<br>(0.84) | -1.06<br>(0.30) | 0.94<br>(4.09)  | 0.14<br>(2.34)   | 0.49<br>(1.98)  | 2.44<br>(3.38)  | 1.71<br>(1.56) | 1.55<br>(1.29) | 0.96 | 0.99 | 0.99 | 0.96 (0.91-0.98)  | 0.99 (0.97-0.99) | 0.99 (0.97-1.00) |
| Right medial orbitofrontal cortex      | 4.81<br>(0.54)  | 4.80<br>(0.50)  | 4.75<br>(0.50)  | 4.81<br>(0.53)  | 11.30 | 10.45 | 10.60 | 11.10 | 0.35<br>(0.73)  | 1.46<br>(0.16)  | -0.14<br>(0.89) | -0.15<br>(3.09) | -1.11<br>(3.68)  | 0.11<br>(4.01)  | 2.36<br>(1.93)  | 3.20<br>(2.01) | 3.18<br>(2.34) | 0.97 | 0.95 | 0.94 | 0.96 (0.91-0.99)  | 0.94 (0.86-0.98) | 0.94 (0.86-0.98) |
| Right middle temporal gyrus            | 10.83<br>(1.17) | 10.79<br>(1.34) | 10.86<br>(1.19) | 10.87<br>(1.13) | 10.81 | 12.46 | 10.98 | 10.42 | 0.46<br>(0.65)  | -0.93<br>(0.36) | -1.07<br>(0.30) | -0.59<br>(4.59) | 0.27<br>(1.30)   | 0.49<br>(2.03)  | 1.88<br>(4.20)  | 1.02<br>(0.81) | 1.45<br>(1.47) | 0.96 | 0.99 | 0.98 | 0.95 (0.89-0.98)  | 0.99 (0.98-1.00) | 0.98 (0.96-0.99) |
| Right parahippocampal gyrus            | 1.84<br>(0.26)  | 1.84<br>(0.25)  | 1.86<br>(0.26)  | 1.84<br>(0.26)  | 14.35 | 13.80 | 13.95 | 14.17 | 0.31<br>(0.76)  | -1.33           |                 |                 |                  |                 |                 |                |                |      |      |      |                   |                  |                  |

|                                                |                 |                 |                 |                 |       |       |       |       |                 |                 |                 |                  |                 |                 |                 |                |                |      |      |      |                      |                      |                      |
|------------------------------------------------|-----------------|-----------------|-----------------|-----------------|-------|-------|-------|-------|-----------------|-----------------|-----------------|------------------|-----------------|-----------------|-----------------|----------------|----------------|------|------|------|----------------------|----------------------|----------------------|
| Right pericalcarine cortex                     | 2.24<br>(0.37)  | 2.16<br>(0.34)  | 2.17<br>(0.30)  | 2.18<br>(0.32)  | 16.34 | 15.70 | 13.94 | 14.59 | 1.31<br>(0.20)  | 1.66<br>(0.11)  | 1.22<br>(0.24)  | -3.50<br>(12.50) | -2.89<br>(8.27) | -2.32<br>(9.05) | 6.07<br>(11.42) | 5.32<br>(6.89) | 5.09<br>(7.77) | 0.69 | 0.84 | 0.81 | 0.68 (0.38-<br>0.86) | 0.81 (0.60-<br>0.92) | 0.80 (0.57-<br>0.91) |
| Right postcentral gyrus                        | 8.34<br>(1.19)  | 8.32<br>(1.21)  | 8.34<br>(1.20)  | 8.32<br>(1.14)  | 14.21 | 14.58 | 14.44 | 13.73 | 0.53<br>(0.61)  | 0.18<br>(0.86)  | 0.88<br>(0.39)  | -0.31<br>(2.54)  | -0.08<br>(1.61) | -0.23<br>(1.53) | 1.44<br>(2.09)  | 1.20<br>(1.04) | 1.17<br>(0.99) | 0.99 | 0.99 | 0.99 | 0.99 (0.97-<br>1.00) | 0.99 (0.99-<br>1.00) | 0.99 (0.99-<br>1.00) |
| Right posterior cingulate cortex               | 2.81<br>(0.54)  | 2.85<br>(0.52)  | 2.85<br>(0.51)  | 2.82<br>(0.52)  | 19.04 | 18.14 | 18.07 | 18.37 | -0.90<br>(0.38) | -0.85<br>(0.40) | -0.27<br>(0.79) | 1.38<br>(7.34)   | 1.31<br>(7.29)  | 0.34<br>(7.33)  | 4.70<br>(5.72)  | 3.79<br>(6.32) | 4.64<br>(5.59) | 0.93 | 0.93 | 0.94 | 0.93 (0.85-<br>0.97) | 0.93 (0.84-<br>0.97) | 0.94 (0.87-<br>0.98) |
| Right precentral gyrus                         | 12.20<br>(1.26) | 12.27<br>(1.24) | 12.17<br>(1.25) | 12.19<br>(1.25) | 10.30 | 10.10 | 10.30 | 10.22 | -1.15<br>(0.26) | 0.66<br>(0.51)  | 0.19<br>(0.85)  | 0.55<br>(2.10)   | -0.25<br>(1.75) | -0.06<br>(1.67) | 1.83<br>(1.10)  | 1.44<br>(0.97) | 1.27<br>(1.05) | 0.98 | 0.99 | 0.99 | 0.98 (0.95-<br>0.99) | 0.99 (0.97-<br>0.99) | 0.99 (0.97-<br>0.99) |
| Right precuneus                                | 8.91<br>(0.92)  | 8.90<br>(0.96)  | 8.87<br>(0.94)  | 8.88<br>(0.97)  | 10.27 | 10.78 | 10.58 | 10.98 | 0.47<br>(0.64)  | 1.12<br>(0.27)  | 1.01<br>(0.32)  | -0.24<br>(1.97)  | -0.47<br>(1.79) | -0.45<br>(1.72) | 1.41<br>(1.36)  | 1.41<br>(1.16) | 1.41<br>(1.04) | 0.98 | 0.99 | 0.99 | 0.98 (0.96-<br>0.99) | 0.98 (0.96-<br>0.99) | 0.99 (0.97-<br>0.99) |
| Right rostral anterior cingulate cortex        | 1.91<br>(0.46)  | 1.91<br>(0.46)  | 1.91<br>(0.48)  | 1.91<br>(0.46)  | 24.39 | 24.15 | 25.14 | 23.89 | -0.11<br>(0.91) | -0.06<br>(0.95) | -0.03<br>(0.98) | 0.04<br>(4.68)   | -0.20<br>(4.77) | 0.04<br>(4.52)  | 3.88<br>(2.46)  | 3.50<br>(3.16) | 3.47<br>(2.79) | 0.98 | 0.98 | 0.98 | 0.98 (0.95-<br>0.99) | 0.98 (0.95-<br>0.99) | 0.98 (0.96-<br>0.99) |
| Right rostral middle frontal gyrus             | 13.88<br>(1.61) | 13.90<br>(1.74) | 13.99<br>(1.66) | 14.01<br>(1.61) | 11.63 | 12.53 | 11.90 | 11.50 | -0.20<br>(0.84) | -2.23<br>(0.04) | -2.53<br>(0.02) | -0.01<br>(2.56)  | 0.71<br>(1.73)  | 0.89<br>(1.71)  | 1.61<br>(1.96)  | 1.53<br>(1.04) | 1.61<br>(1.01) | 0.98 | 0.99 | 0.99 | 0.98 (0.96-<br>0.99) | 0.99 (0.97-<br>1.00) | 0.99 (0.96-<br>1.00) |
| Right superior frontal gyrus                   | 19.36<br>(2.33) | 19.21<br>(2.43) | 19.33<br>(2.40) | 19.29<br>(2.44) | 12.03 | 12.66 | 12.41 | 12.62 | 0.98<br>(0.34)  | 0.41<br>(0.69)  | 0.75<br>(0.46)  | -0.84<br>(3.56)  | -0.19<br>(1.61) | -0.40<br>(2.06) | 1.99<br>(3.04)  | 1.05<br>(1.22) | 1.52<br>(1.41) | 0.96 | 0.99 | 0.99 | 0.96 (0.90-<br>0.98) | 0.99 (0.98-<br>1.00) | 0.99 (0.97-<br>0.99) |
| Right superior parietal cortex                 | 11.44<br>(1.45) | 11.31<br>(1.53) | 11.43<br>(1.37) | 11.44<br>(1.42) | 12.67 | 13.50 | 11.95 | 12.39 | 1.70<br>(0.10)  | 0.23<br>(0.82)  | 0.09<br>(0.93)  | -1.28<br>(3.94)  | -0.01<br>(1.82) | 0.01<br>(1.19)  | 2.07<br>(3.58)  | 1.24<br>(1.31) | 0.99<br>(0.62) | 0.97 | 0.99 | 1.00 | 0.97 (0.93-<br>0.99) | 0.99 (0.97-<br>1.00) | 1.00 (0.99-<br>1.00) |
| Right superior temporal gyrus                  | 10.39<br>(1.12) | 10.36<br>(1.15) | 10.40<br>(1.12) | 10.40<br>(1.16) | 10.83 | 11.12 | 10.78 | 11.15 | 0.46<br>(0.65)  | -0.37<br>(0.72) | -0.31<br>(0.76) | -0.28<br>(2.56)  | 0.17<br>(1.95)  | 0.10<br>(2.01)  | 1.71<br>(1.89)  | 1.64<br>(0.99) | 1.51<br>(1.29) | 0.97 | 0.98 | 0.98 | 0.97 (0.94-<br>0.99) | 0.98 (0.96-<br>0.99) | 0.98 (0.96-<br>0.99) |
| Right supramarginal gyrus                      | 9.21<br>(1.00)  | 9.11<br>(1.10)  | 9.14<br>(1.05)  | 9.20<br>(1.01)  | 10.90 | 12.07 | 11.45 | 10.99 | 1.16<br>(0.26)  | 1.89<br>(0.07)  | 0.27<br>(0.79)  | -1.13<br>(4.11)  | -0.73<br>(1.63) | -0.14<br>(1.82) | 2.44<br>(3.45)  | 1.51<br>(0.92) | 1.41<br>(1.11) | 0.95 | 0.99 | 0.98 | 0.94 (0.86-<br>0.98) | 0.99 (0.97-<br>1.00) | 0.99 (0.96-<br>0.99) |
| Right frontal pole                             | 1.04<br>(0.15)  | 1.05<br>(0.11)  | 1.06<br>(0.17)  | 1.03<br>(0.14)  | 14.80 | 10.92 | 16.08 | 13.75 | -0.23<br>(0.82) | -0.76<br>(0.46) | 0.74<br>(0.47)  | 0.95<br>(9.21)   | 1.38<br>(11.32) | -0.83<br>(6.64) | 7.19<br>(5.60)  | 7.15<br>(8.74) | 5.33<br>(3.86) | 0.81 | 0.80 | 0.91 | 0.78 (0.53-<br>0.90) | 0.80 (0.58-<br>0.92) | 0.90 (0.78-<br>0.96) |
| Right temporal pole                            | 2.46<br>(0.23)  | 2.44<br>(0.20)  | 2.44<br>(0.27)  | 2.49<br>(0.24)  | 9.44  | 8.01  | 11.06 | 9.70  | 0.71<br>(0.49)  | 0.48<br>(0.64)  | -1.18<br>(0.25) | -0.77<br>(5.90)  | -1.03<br>(8.25) | 1.49<br>(5.89)  | 4.45<br>(3.83)  | 6.18<br>(5.39) | 4.66<br>(3.77) | 0.79 | 0.68 | 0.82 | 0.78 (0.54-<br>0.91) | 0.68 (0.36-<br>0.86) | 0.81 (0.60-<br>0.92) |
| Right transverse temporal gyrus                | 0.84<br>(0.15)  | 0.83<br>(0.14)  | 0.84<br>(0.15)  | 0.84<br>(0.15)  | 17.76 | 16.40 | 18.00 | 17.51 | 1.81<br>(0.09)  | 1.06<br>(0.30)  | 0.61<br>(0.55)  | -1.44<br>(4.47)  | -0.80<br>(3.53) | -0.29<br>(2.71) | 3.72<br>(2.75)  | 3.22<br>(1.50) | 2.30<br>(1.37) | 0.97 | 0.98 | 0.99 | 0.97 (0.91-<br>0.99) | 0.98 (0.96-<br>0.99) | 0.99 (0.98-<br>1.00) |
| Right insula                                   | 6.72<br>(0.57)  | 6.62<br>(0.67)  | 6.68<br>(0.71)  | 6.74<br>(0.67)  | 8.48  | 10.19 | 10.58 | 9.90  | 1.41<br>(0.17)  | 0.56<br>(0.58)  | -0.22<br>(0.83) | -1.69<br>(4.80)  | -0.84<br>(5.17) | 0.12<br>(4.90)  | 3.68<br>(3.44)  | 3.80<br>(3.51) | 3.78<br>(3.01) | 0.87 | 0.87 | 0.86 | 0.85 (0.67-<br>0.94) | 0.85 (0.67-<br>0.94) | 0.86 (0.68-<br>0.94) |
| <b>Local cortical surface (cm<sup>2</sup>)</b> |                 |                 |                 |                 |       |       |       |       |                 |                 |                 |                  |                 |                 |                 |                |                |      |      |      |                      |                      |                      |
| Left banks superior temporal sulcus            | 9.01<br>(1.18)  | 8.84<br>(1.26)  | 8.87<br>(1.25)  | 9.08<br>(1.28)  | 13.11 | 14.20 | 14.14 | 14.05 | 1.66<br>(0.11)  | 2.28<br>(0.03)  | -1.02<br>(0.32) | -2.09<br>(6.02)  | -1.79<br>(4.04) | 0.57<br>(3.79)  | 3.63<br>(5.20)  | 2.73<br>(3.45) | 2.51<br>(2.84) | 0.93 | 0.97 | 0.97 | 0.92 (0.81-<br>0.97) | 0.97 (0.91-<br>0.99) | 0.97 (0.93-<br>0.99) |
| Left caudal anterior cingulate cortex          | 5.56<br>(1.09)  | 5.59<br>(1.06)  | 5.48<br>(1.16)  | 5.62<br>(1.08)  | 19.58 | 18.87 | 21.16 | 19.15 | -0.56<br>(0.58) | 1.20<br>(0.24)  | -1.42<br>(0.17) | 0.74<br>(5.57)   | -1.74<br>(6.13) | 1.19<br>(3.81)  | 4.02<br>(3.82)  | 3.55<br>(5.25) | 3.05<br>(2.50) | 0.97 | 0.96 | 0.98 | 0.97 (0.92-<br>0.99) | 0.96 (0.90-<br>0.98) | 0.98 (0.96-<br>0.99) |
| Left caudal middle frontal gyrus               | 20.53<br>(3.28) | 20.48<br>(3.37) | 20.43<br>(3.36) | 20.56<br>(3.38) | 15.97 | 16.45 | 16.44 | 16.46 | 0.57<br>(0.57)  | 1.05<br>(0.31)  | -0.42<br>(0.68) | -0.30<br>(2.09)  | -0.56<br>(2.27) | 0.11<br>(2.07)  | 1.45<br>(1.51)  | 1.53<br>(1.74) | 1.60<br>(1.28) | 0.99 | 0.99 | 0.99 | 0.99 (0.98-<br>1.00) | 0.99 (0.98-<br>1.00) | 0.99 (0.98-<br>1.00) |
| Left cuneus                                    | 14.33<br>(2.05) | 14.27<br>(2.22) | 14.53<br>(2.08) | 14.37<br>(2.11) | 14.33 | 15.58 | 14.32 | 14.70 | 0.57<br>(0.58)  | -2.07<br>(0.05) | -0.72<br>(0.48) | -0.60<br>(3.85)  | 1.40<br>(3.34)  | 0.23<br>(1.96)  | 2.18<br>(3.19)  | 2.58<br>(2.50) | 1.46<br>(1.29) | 0.98 | 0.98 | 0.99 | 0.98 (0.94-<br>0.99) | 0.97 (0.93-<br>0.99) | 0.99 (0.98-<br>1.00) |
| Left entorhinal cortex                         | 4.30<br>(1.13)  | 4.33<br>(1.00)  | 4.28<br>(1.08)  | 4.31<br>(1.10)  | 26.38 | 23.06 | 25.36 | 25.52 | -0.37<br>(0.71) | 0.37<br>(0.72)  | -0.25<br>(0.81) | 1.21<br>(8.68)   | -0.45<br>(5.70) | 0.64<br>(5.63)  | 6.66<br>(5.51)  | 4.74<br>(3.02) | 4.35<br>(3.50) | 0.95 | 0.98 | 0.98 | 0.95 (0.87-<br>0.98) | 0.98 (0.94-<br>0.99) | 0.98 (0.96-<br>0.99) |
| Left fusiform gyrus                            | 29.19<br>(3.52) | 29.12<br>(3.65) | 29.21<br>(3.53) | 29.26<br>(3.40) | 12.07 | 12.52 | 12.08 | 11.63 | 0.42<br>(0.68)  | -0.13<br>(0.90) | -0.46<br>(0.65) | -0.28<br>(2.59)  | 0.05<br>(1.90)  | 0.29<br>(2.55)  | 2.03<br>(1.58)  | 1.49<br>(1.12) | 1.87<br>(1.70) | 0.98 | 0.99 | 0.98 | 0.98 (0.95-<br>0.99) | 0.99 (0.97-<br>0.99) | 0.98 (0.95-<br>0.99) |
| Left inferior parietal cortex                  | 40.41<br>(6.19) | 39.62<br>(6.30) | 40.10<br>(6.16) | 40.39<br>(6.25) | 15.33 | 15.89 | 15.36 | 15.49 | 1.61<br>(0.12)  | 1.89<br>(0.07)  | 0.13<br>(0.90)  | -2.24<br>(7.10)  | -0.79<br>(1.90) | -0.08<br>(1.92) | 3.12<br>(6.74)  | 1.66<br>(1.17) | 1.52<br>(1.13) | 0.94 | 0.99 | 0.99 | 0.93 (0.84-<br>0.97) | 0.99 (0.98-<br>1.00) | 0.99 (0.98-<br>1.00) |
| Left inferior temporal gyrus                   | 31.30<br>(3.86) | 31.12<br>(3.98) | 31.21<br>(4.06) | 31.51<br>(3.83) | 12.33 | 12.78 | 13.00 | 12.16 | 2.13<br>(0.05)  | 0.75<br>(0.46)  | -1.67<br>(0.11) | -0.63<br>(1.33)  | -0.38<br>(1.82) | 0.71<br>(1.98)  | 0.94<br>(1.12)  | 1.48<br>(1.09) | 1.58<br>(1.35) | 1.00 | 0.99 | 0.99 | 0.99 (0.98-<br>1.00) | 0.99 (0.98-<br>1.00) | 0.99 (0.97-<br>1.00) |
| Left isthmus cingulate cortex                  | 9.16<br>(1.08)  | 9.13<br>(1.00)  | 9.04<br>(1.08)  | 9.07<br>(1.05)  | 11.78 | 10.95 | 11.94 | 11.58 | 0.28<br>(0.78)  | 2.18<br>(0.04)  | 2.07<br>(0.05)  | -0.18<br>(5.44)  | -1.35<br>(2.83) | -1.03<br>(2.43) | 3.88<br>(3.72)  | 2.28<br>(2.11) | 2.05<br>(1.62) | 0.90 | 0.97 | 0.98 | 0.91 (0.78-<br>0.96) | 0.97 (0.91-<br>0.99) | 0.98 (0.94-<br>0.99) |
| Left lateral occipital cortex                  | 47.26<br>(4.63) | 46.81<br>(5.57) | 47.12<br>(4.72) | 47.17<br>(4.86) | 9.79  | 11.89 | 10.01 | 10.30 | 0.93<br>(0.36)  | 0.79<br>(0.44)  | 0.43<br>(0.67)  | -1.19<br>(5.53)  | -0.31<br>(1.69) | -0.23<br>(2.13) | 2.31<br>(5.14)  | 1.32<br>(1.05) | 1.29<br>(1.69) | 0.92 | 0.99 | 0.98 | 0.91 (0.79-<br>0.96) | 0.99 (0.97-<br>0.99) | 0.98 (0.95-<br>0.99) |
| Left lateral orbitofrontal cortex              | 24.71<br>(2.68) | 24.75<br>(2.87) | 24.68<br>(2.78) | 24.85<br>(2.88) | 10.86 | 11.61 | 11.26 | 11.61 | -0.50<br>(0.62) | 0.36<br>(0.73)  | -1.69<br>(0.11) | 0.10<br>(1.77)   | -0.17<br>(1.53) | 0.48<br>(1.39)  | 1.24<br>(1.24)  | 1.24<br>(0.87) | 1.12<br>(0.94) | 0.99 | 0.99 | 0.99 | 0.99 (0.97-<br>1.00) | 0.99 (0.98-<br>1.00) | 0.99 (0.98-<br>1.00) |
| Left lingual gyrus                             | 29.65<br>(3.75) | 29.65<br>(3.58) | 29.77<br>(3.75) | 29.76<br>(3.58) | 12.64 | 12.09 | 12.60 | 12.04 | -0.02<br>(0.99) | -0.85<br>(0.41) | -0.76<br>(0.46) | 0.06<br>(1.91)   | 0.42<br>(2.15)  | 0.43<br>(2.09)  | 1.54<br>(1.08)  | 1.86<br>(1.08) | 1.72<br>(1.22) | 0.99 | 0.98 | 0.98 | 0.99 (0.97-<br>1.00) | 0.98 (0.96-<br>0.99) | 0.98 (0.96-<br>0.99) |
| Left medial orbitofrontal cortex               | 18.66<br>(2.42) | 18.40<br>(2.55) | 18.07<br>(2.50) | 18.79<br>(2.37) | 12.97 | 13.84 | 13.85 | 12.60 | 0.97<br>(0.34)  | 2.37<br>(0.03)  | -0.55<br>(0.59) | -1.48<br>(6.75)  | -3.21<br>(6.34) | 0.75<br>(6.01)  | 5.55<br>(3.94)  | 5.49<br>(4.40) | 4.60<br>(3.80) | 0.88 | 0.90 | 0.90 | 0.88 (0.74-<br>0.95) | 0.87 (0.68-<br>0.95) | 0.90 (0.77-<br>0.96) |
| Left middle temporal gyrus                     | 28.89<br>(3.48) | 29.07<br>(3.55) | 28.93<br>(3.54) | 29.13<br>(3.39) | 12.03 | 12.20 | 12.24 | 11.65 | -1.32<br>(0.20) | -0.40<br>(0.69) | -2.20<br>(0.04) | 0.58<br>(2.24)   | 0.08<br>(1.38)  | 0.88<br>(1.77)  | 1.55<br>(1.69)  | 0.98<br>(0.95) | 1.50<br>(1.25) | 0.99 | 0.99 | 0.99 | 0.98 (0.96-<br>0.99) | 0.99 (0.99-<br>1.00) | 0.99 (0.97-<br>1.00) |
| Left parahippocampal gyrus                     | 6.16<br>(0.89)  | 6.21<br>(0.86)  | 6.20<br>(0.88)  | 6.26<br>(0.99)  | 14.44 | 13.87 | 14.25 | 15.87 | -1.25<br>(0.23) | -0.83<br>(0.42) | -1.52<br>(0.14) | 0.95<br>(3.46)   | 0.69<br>(3.64)  | 1.40<br>(4.50)  | 2.84<br>(2.11)  | 2.85<br>(2.28) | 3.75<br>(2.76) | 0.97 | 0.96 | 0.96 | 0.97 (0.93-<br>0.99) | 0.97 (0.92-<br>0.99) | 0.95 (0.88-<br>0.98) |
| Left paracentral lobule                        | 13.37<br>(1.82) | 13.33<br>(1.93) | 13.40<br>(1.99) | 13.31<br>(1.94) | 13.60 | 14.51 | 14.86 | 14.59 | 0.63<br>(0.54)  | -0.33<br>(0.74) | 1.11<br>(0.28)  | -0.38<br>(1.97)  | 0.06<br>(2.25)  | -0.59<br>(1.95) | 1.52<br>(1.28)  | 1.63<br>(1.51) | 1.63<br>(1.17) | 0.99 | 0.99 | 0.99 | 0.99 (0.97-<br>1.00) | 0.98 (0.96-<br>0.99) | 0.99 (0.98-<br>1.00) |
| Left pars opercularis                          | 14.49<br>(1.98) | 14.62<br>(1.99) | 14.49<br>(1.98) | 14.62<br>(2.00) | 13.69 | 13.62 | 13.70 | 13.70 | -1.63<br>(0.12) | 0.07<br>(0.94)  | -1.93<br>(0.07) | 0.88<br>(2.28)   | -0.04<br>(2.55) | 0.91<br>(1.99)  | 1.95<br>(1.43)  | 1.84<br>(1.73) | 1.76<br>(1.24) | 0.98 | 0.98 | 0.99 | 0.98 (0.96-<br>0.99) | 0.98 (0.96-<br>0.99) | 0.99 (0.96-<br>0.99) |
| Left pars orbitalis                            | 6.40<br>(0.87)  | 6.44<br>(0.88)  | 6.44<br>(0.84)  | 6.44<br>(0.78)  | 13.59 | 13.72 | 13.05 | 12.12 | -0.85<br>(0.41) | -1.05<br>(0.31) | -0.86<br>(0.40) | 0.59<br>(3.40)   | 0.75<br>(2.99)  | 0.87<br>(3.61)  | 2.76<br>(1.99)  | 2.32<br>(1.97) | 3.03<br>(2.04) | 0.97 | 0.97 | 0.96 | 0.97 (0.93-<br>0.99) | 0.97 (0.94-<br>0.99) | 0.96 (0.90-<br>0.98) |
| Left pars triangularis                         | 12.16<br>(1.90) | 12.14<br>(1.83) | 12.05<br>(1.83) | 12.14<br>(1.85) | 15.64 | 15.06 | 15.16 | 15.26 | 0.33<br>(0.75)  | 2.21<br>(0.04)  | 0.26<br>(0.80)  | -0.06<br>(2.05)  | -0.85<br>(1.70) | -0.13<br>(3.13) | 1.68<br>(1.13)  | 1.50<br>(1.14) | 2.46           |      |      |      |                      |                      |                      |

|                                         |                 |                 |                 |                 |       |       |       |       |                 |                 |                 |                 |                 |                 |                |                |                |      |      |      |                      |                      |                      |
|-----------------------------------------|-----------------|-----------------|-----------------|-----------------|-------|-------|-------|-------|-----------------|-----------------|-----------------|-----------------|-----------------|-----------------|----------------|----------------|----------------|------|------|------|----------------------|----------------------|----------------------|
| Left rostral anterior cingulate cortex  | 8.41<br>(1.79)  | 8.38<br>(1.67)  | 8.48<br>(1.89)  | 8.41<br>(1.76)  | 21.33 | 19.98 | 22.32 | 20.93 | 0.30<br>(0.77)  | -0.83<br>(0.42) | 0.00<br>(1.00)  | 0.04<br>(6.27)  | 0.64<br>(4.50)  | 0.05<br>(4.30)  | 4.44<br>(4.31) | 3.44<br>(2.87) | 3.62<br>(2.17) | 0.97 | 0.98 | 0.98 | 0.97 (0.92-<br>0.99) | 0.98 (0.95-<br>0.99) | 0.98 (0.96-<br>0.99) |
| Left rostral middle frontal gyrus       | 52.24<br>(7.08) | 51.98<br>(7.44) | 51.97<br>(6.82) | 52.37<br>(6.85) | 13.54 | 14.32 | 13.12 | 13.07 | 1.11<br>(0.28)  | 1.06<br>(0.30)  | -0.57<br>(0.58) | -0.60<br>(2.19) | -0.46<br>(2.29) | 0.31<br>(2.11)  | 1.75<br>(1.39) | 1.94<br>(1.23) | 1.73<br>(1.19) | 0.99 | 0.99 | 0.99 | 0.99 (0.97-<br>1.00) | 0.99 (0.97-<br>0.99) | 0.99 (0.97-<br>1.00) |
| Left superior frontal gyrus             | 69.93<br>(9.72) | 69.64<br>(9.72) | 70.04<br>(9.61) | 69.97<br>(9.84) | 13.90 | 13.96 | 13.73 | 14.06 | 1.78<br>(0.09)  | -0.68<br>(0.51) | -0.20<br>(0.84) | -0.42<br>(1.10) | 0.18<br>(1.06)  | 0.05<br>(1.33)  | 0.90<br>(0.74) | 0.83<br>(0.66) | 1.02<br>(0.83) | 1.00 | 1.00 | 1.00 | 1.00 (0.99-<br>1.00) | 1.00 (0.99-<br>1.00) | 1.00 (0.99-<br>1.00) |
| Left superior parietal cortex           | 49.49<br>(6.20) | 49.13<br>(7.38) | 49.30<br>(6.28) | 49.46<br>(6.12) | 12.53 | 15.01 | 12.75 | 12.38 | 0.84<br>(0.41)  | 1.38<br>(0.18)  | 0.27<br>(0.79)  | -1.15<br>(5.63) | -0.40<br>(1.27) | -0.03<br>(0.95) | 2.11<br>(5.33) | 1.21<br>(0.51) | 0.80<br>(0.49) | 0.97 | 1.00 | 1.00 | 0.96 (0.90-<br>0.98) | 0.99 (0.99-<br>1.00) | 1.00 (0.99-<br>1.00) |
| Left superior temporal gyrus            | 37.51<br>(4.24) | 37.49<br>(4.37) | 37.54<br>(4.40) | 37.53<br>(4.38) | 11.30 | 11.65 | 11.73 | 11.68 | 0.30<br>(0.77)  | -0.27<br>(0.79) | -0.20<br>(0.85) | -0.10<br>(0.97) | 0.03<br>(1.35)  | 0.02<br>(1.37)  | 0.74<br>(0.63) | 0.95<br>(0.92) | 1.07<br>(0.82) | 1.00 | 0.99 | 0.99 | 1.00 (0.99-<br>1.00) | 0.99 (0.99-<br>1.00) | 0.99 (0.98-<br>1.00) |
| Left supramarginal gyrus                | 37.99<br>(6.26) | 38.00<br>(7.18) | 37.96<br>(6.43) | 38.00<br>(6.48) | 16.48 | 18.88 | 16.94 | 17.06 | -0.02<br>(0.98) | 0.23<br>(0.82)  | -0.16<br>(0.87) | -0.31<br>(4.85) | -0.13<br>(1.35) | -0.04<br>(1.16) | 2.48<br>(4.15) | 0.99<br>(0.89) | 0.95<br>(0.62) | 0.97 | 1.00 | 1.00 | 0.96 (0.91-<br>0.98) | 1.00 (0.99-<br>1.00) | 1.00 (0.99-<br>1.00) |
| Left frontal pole                       | 2.44<br>(0.30)  | 2.44<br>(0.35)  | 2.42<br>(0.30)  | 2.46<br>(0.31)  | 12.41 | 14.21 | 12.26 | 12.45 | 0.07<br>(0.94)  | 0.85<br>(0.41)  | -0.48<br>(0.63) | -0.37<br>(7.65) | -1.11<br>(6.22) | 0.56<br>(5.60)  | 5.95<br>(4.64) | 4.34<br>(4.50) | 4.47<br>(3.27) | 0.85 | 0.88 | 0.90 | 0.85 (0.66-<br>0.94) | 0.89 (0.74-<br>0.95) | 0.90 (0.78-<br>0.96) |
| Left temporal pole                      | 4.42<br>(0.56)  | 4.34<br>(0.52)  | 4.46<br>(0.49)  | 4.41<br>(0.52)  | 12.76 | 12.06 | 11.01 | 11.78 | 1.72<br>(0.10)  | -0.59<br>(0.56) | 0.17<br>(0.86)  | -1.68<br>(4.49) | 0.98<br>(6.34)  | -0.12<br>(5.42) | 3.80<br>(2.82) | 5.10<br>(3.74) | 4.52<br>(2.83) | 0.93 | 0.87 | 0.91 | 0.92 (0.81-<br>0.97) | 0.87 (0.70-<br>0.94) | 0.91 (0.78-<br>0.96) |
| Left transverse temporal gyrus          | 4.18<br>(0.72)  | 4.21<br>(0.75)  | 4.18<br>(0.76)  | 4.19<br>(0.74)  | 17.30 | 17.92 | 18.08 | 17.59 | -0.76<br>(0.46) | -0.08<br>(0.93) | -0.33<br>(0.74) | 0.67<br>(4.31)  | -0.05<br>(4.78) | 0.24<br>(3.70)  | 3.29<br>(2.77) | 3.38<br>(3.30) | 2.83<br>(2.32) | 0.97 | 0.96 | 0.98 | 0.97 (0.92-<br>0.99) | 0.96 (0.91-<br>0.98) | 0.98 (0.95-<br>0.99) |
| Left insula                             | 23.42<br>(2.77) | 23.63<br>(2.60) | 23.80<br>(2.82) | 23.44<br>(2.49) | 11.82 | 11.01 | 11.85 | 10.61 | -0.74<br>(0.47) | -1.03<br>(0.31) | -0.06<br>(0.95) | 0.92<br>(5.21)  | 1.60<br>(7.27)  | 0.19<br>(7.07)  | 3.81<br>(3.59) | 5.28<br>(5.12) | 4.84<br>(5.05) | 0.88 | 0.81 | 0.79 | 0.89 (0.74-<br>0.95) | 0.81 (0.60-<br>0.92) | 0.79 (0.55-<br>0.91) |
| Right banks superior temporal sulcus    | 8.26<br>(0.92)  | 8.12<br>(1.02)  | 8.14<br>(0.81)  | 8.27<br>(0.88)  | 11.16 | 12.62 | 9.90  | 10.64 | 1.95<br>(0.06)  | 1.92<br>(0.07)  | -0.20<br>(0.84) | -1.88<br>(4.48) | -1.33<br>(3.45) | 0.19<br>(2.88)  | 3.66<br>(3.11) | 2.48<br>(2.70) | 2.33<br>(1.61) | 0.95 | 0.95 | 0.97 | 0.94 (0.84-<br>0.97) | 0.94 (0.85-<br>0.97) | 0.97 (0.92-<br>0.99) |
| Right caudal anterior cingulate cortex  | 6.94<br>(1.30)  | 6.99<br>(1.43)  | 6.91<br>(1.22)  | 6.86<br>(1.20)  | 18.76 | 20.42 | 17.73 | 17.43 | -0.69<br>(0.50) | 0.50<br>(0.63)  | 1.21<br>(0.24)  | 0.42<br>(4.73)  | -0.26<br>(3.95) | -0.98<br>(4.24) | 3.84<br>(2.66) | 3.09<br>(2.38) | 3.41<br>(2.60) | 0.97 | 0.98 | 0.97 | 0.97 (0.93-<br>0.99) | 0.98 (0.94-<br>0.99) | 0.97 (0.92-<br>0.99) |
| Right caudal middle frontal gyrus       | 20.35<br>(3.62) | 20.15<br>(3.87) | 20.31<br>(3.61) | 20.26<br>(3.72) | 17.81 | 19.19 | 17.76 | 18.36 | 1.81<br>(0.08)  | 0.41<br>(0.68)  | 1.00<br>(0.33)  | -1.24<br>(2.88) | -0.17<br>(2.29) | -0.53<br>(2.28) | 2.15<br>(2.25) | 1.71<br>(1.49) | 1.75<br>(1.51) | 0.99 | 0.99 | 0.99 | 0.99 (0.97-<br>1.00) | 0.99 (0.98-<br>1.00) | 0.99 (0.98-<br>1.00) |
| Right cuneus                            | 15.05<br>(2.23) | 15.25<br>(2.32) | 15.17<br>(2.23) | 15.31<br>(2.32) | 14.85 | 15.24 | 14.67 | 15.17 | -1.28<br>(0.21) | -0.56<br>(0.58) | -1.30<br>(0.21) | 1.21<br>(4.73)  | 0.76<br>(6.02)  | 1.61<br>(6.21)  | 2.71<br>(4.03) | 3.52<br>(4.89) | 3.47<br>(5.36) | 0.95 | 0.91 | 0.92 | 0.95 (0.89-<br>0.98) | 0.91 (0.80-<br>0.96) | 0.92 (0.82-<br>0.97) |
| Right entorhinal cortex                 | 3.49<br>(0.76)  | 3.56<br>(0.73)  | 3.62<br>(0.80)  | 3.60<br>(0.82)  | 21.70 | 20.54 | 22.13 | 22.66 | -1.28<br>(0.21) | -1.56<br>(0.13) | -1.69<br>(0.11) | 2.27<br>(8.02)  | 3.78<br>(10.00) | 3.09<br>(8.92)  | 6.24<br>(5.36) | 8.46<br>(6.32) | 6.76<br>(6.45) | 0.93 | 0.87 | 0.92 | 0.93 (0.84-<br>0.97) | 0.86 (0.69-<br>0.94) | 0.91 (0.80-<br>0.96) |
| Right fusiform gyrus                    | 27.56<br>(3.16) | 27.44<br>(3.39) | 27.43<br>(3.26) | 27.40<br>(3.04) | 11.46 | 12.37 | 11.89 | 11.11 | 0.98<br>(0.34)  | 1.13<br>(0.27)  | 1.09<br>(0.29)  | -0.53<br>(2.10) | -0.52<br>(1.97) | -0.54<br>(2.33) | 1.39<br>(1.64) | 1.57<br>(1.26) | 1.82<br>(1.51) | 0.99 | 0.99 | 0.98 | 0.99 (0.97-<br>0.99) | 0.99 (0.97-<br>0.99) | 0.98 (0.94-<br>0.99) |
| Right inferior parietal cortex          | 45.90<br>(6.00) | 45.09<br>(6.80) | 45.59<br>(5.49) | 45.80<br>(6.06) | 13.08 | 15.08 | 12.05 | 13.24 | 1.66<br>(0.11)  | 1.60<br>(0.12)  | 0.61<br>(0.55)  | -2.13<br>(6.76) | -0.55<br>(1.94) | -0.25<br>(1.86) | 2.57<br>(6.60) | 1.48<br>(1.33) | 1.28<br>(1.34) | 0.95 | 0.99 | 0.99 | 0.94 (0.85-<br>0.97) | 0.99 (0.97-<br>0.99) | 0.99 (0.98-<br>1.00) |
| Right inferior temporal gyrus           | 30.46<br>(4.72) | 30.35<br>(4.69) | 30.24<br>(4.59) | 30.46<br>(4.63) | 15.51 | 15.45 | 15.17 | 15.21 | 0.84<br>(0.41)  | 1.45<br>(0.16)  | 0.03<br>(0.98)  | -0.37<br>(2.18) | -0.71<br>(2.33) | 0.03<br>(2.40)  | 1.68<br>(1.40) | 1.77<br>(1.63) | 1.80<br>(1.53) | 0.99 | 0.99 | 0.99 | 0.99 (0.98-<br>1.00) | 0.99 (0.97-<br>0.99) | 0.99 (0.97-<br>1.00) |
| Right isthmus cingulate cortex          | 8.09<br>(1.12)  | 8.13<br>(1.07)  | 8.15<br>(1.05)  | 8.15<br>(1.11)  | 13.83 | 13.20 | 12.85 | 13.64 | -0.55<br>(0.59) | -0.54<br>(0.60) | -0.54<br>(0.59) | 0.67<br>(4.87)  | 0.92<br>(6.82)  | 0.84<br>(6.76)  | 3.75<br>(3.06) | 5.38<br>(4.12) | 5.51<br>(3.82) | 0.94 | 0.89 | 0.89 | 0.94 (0.86-<br>0.98) | 0.89 (0.76-<br>0.96) | 0.89 (0.75-<br>0.95) |
| Right lateral occipital cortex          | 46.38<br>(5.52) | 45.80<br>(6.79) | 46.40<br>(5.68) | 46.51<br>(5.79) | 11.89 | 14.83 | 12.24 | 12.45 | 0.96<br>(0.35)  | -0.12<br>(0.91) | -0.81<br>(0.43) | -1.70<br>(7.82) | 0.01<br>(1.92)  | 0.22<br>(1.75)  | 2.74<br>(7.51) | 1.42<br>(1.25) | 1.36<br>(1.09) | 0.92 | 0.99 | 0.99 | 0.90 (0.78-<br>0.96) | 0.99 (0.97-<br>1.00) | 0.99 (0.98-<br>1.00) |
| Right lateral orbitofrontal cortex      | 24.72<br>(2.81) | 25.53<br>(3.35) | 25.32<br>(2.88) | 24.80<br>(2.97) | 11.38 | 13.11 | 11.38 | 11.98 | -2.76<br>(0.01) | -2.05<br>(0.05) | -0.34<br>(0.73) | 3.02<br>(5.03)  | 2.44<br>(5.18)  | 0.29<br>(4.25)  | 4.70<br>(3.42) | 4.61<br>(3.28) | 3.31<br>(2.57) | 0.92 | 0.89 | 0.93 | 0.88 (0.66-<br>0.95) | 0.87 (0.70-<br>0.95) | 0.93 (0.84-<br>0.97) |
| Right lingual gyrus                     | 30.70<br>(4.11) | 30.77<br>(4.10) | 30.67<br>(3.80) | 30.67<br>(3.97) | 13.38 | 13.32 | 12.40 | 12.94 | -0.42<br>(0.68) | 0.19<br>(0.85)  | 0.26<br>(0.80)  | 0.22<br>(2.41)  | 0.00<br>(2.19)  | -0.08<br>(2.08) | 2.00<br>(1.27) | 1.64<br>(1.39) | 1.64<br>(1.23) | 0.98 | 0.99 | 0.99 | 0.98 (0.96-<br>0.99) | 0.98 (0.96-<br>0.99) | 0.99 (0.97-<br>0.99) |
| Right medial orbitofrontal cortex       | 18.68<br>(2.25) | 18.79<br>(2.09) | 18.57<br>(2.04) | 18.70<br>(2.00) | 12.04 | 11.10 | 10.97 | 10.71 | -0.59<br>(0.56) | 0.61<br>(0.55)  | -0.12<br>(0.91) | 0.71<br>(4.76)  | -0.44<br>(4.39) | 0.27<br>(5.13)  | 3.79<br>(2.84) | 3.52<br>(2.55) | 3.79<br>(3.36) | 0.92 | 0.94 | 0.91 | 0.92 (0.82-<br>0.97) | 0.93 (0.85-<br>0.97) | 0.91 (0.79-<br>0.96) |
| Right middle temporal gyrus             | 32.46<br>(3.34) | 32.22<br>(3.47) | 32.49<br>(3.26) | 32.71<br>(3.26) | 10.28 | 10.77 | 10.04 | 9.96  | 1.58<br>(0.13)  | -0.21<br>(0.83) | -1.96<br>(0.06) | -0.82<br>(2.56) | 0.10<br>(1.80)  | 0.80<br>(1.91)  | 1.22<br>(2.39) | 1.55<br>(0.85) | 1.42<br>(1.48) | 0.98 | 0.98 | 0.98 | 0.98 (0.94-<br>0.99) | 0.98 (0.96-<br>0.99) | 0.98 (0.95-<br>0.99) |
| Right parahippocampal gyrus             | 5.85<br>(0.65)  | 5.87<br>(0.61)  | 5.93<br>(0.65)  | 5.91<br>(0.63)  | 11.03 | 10.48 | 10.89 | 10.75 | -0.32<br>(0.76) | -1.51<br>(0.15) | -0.86<br>(0.40) | 0.29<br>(3.51)  | 1.25<br>(3.84)  | 0.99<br>(5.16)  | 2.65<br>(2.25) | 3.30<br>(2.23) | 3.94<br>(3.37) | 0.95 | 0.94 | 0.89 | 0.95 (0.88-<br>0.98) | 0.94 (0.85-<br>0.97) | 0.89 (0.75-<br>0.95) |
| Right paracentral lobule                | 14.86<br>(1.71) | 14.79<br>(1.63) | 14.84<br>(1.77) | 14.81<br>(1.77) | 11.48 | 11.01 | 11.90 | 11.97 | 1.05<br>(0.31)  | 0.35<br>(0.73)  | 0.60<br>(0.56)  | -0.39<br>(1.78) | -0.19<br>(1.87) | -0.35<br>(2.27) | 1.28<br>(1.27) | 1.49<br>(1.10) | 1.80<br>(1.38) | 0.99 | 0.99 | 0.98 | 0.99 (0.97-<br>0.99) | 0.99 (0.97-<br>1.00) | 0.98 (0.96-<br>0.99) |
| Right pars opercularis                  | 12.40<br>(1.76) | 12.42<br>(1.71) | 12.43<br>(1.72) | 12.38<br>(1.67) | 14.19 | 13.78 | 13.81 | 13.45 | -0.27<br>(0.79) | -0.46<br>(0.65) | 0.17<br>(0.87)  | 0.26<br>(3.55)  | 0.36<br>(3.10)  | 0.00<br>(3.39)  | 2.57<br>(2.40) | 2.22<br>(2.13) | 2.71<br>(1.95) | 0.97 | 0.98 | 0.97 | 0.97 (0.93-<br>0.99) | 0.98 (0.95-<br>0.99) | 0.97 (0.93-<br>0.99) |
| Right pars orbitalis                    | 7.51<br>(0.98)  | 7.53<br>(0.97)  | 7.46<br>(0.88)  | 7.46<br>(0.96)  | 13.07 | 12.87 | 11.74 | 12.82 | -0.32<br>(0.75) | 1.03<br>(0.31)  | 0.97<br>(0.35)  | 0.20<br>(2.72)  | -0.53<br>(2.91) | -0.64<br>(3.03) | 2.09<br>(1.69) | 2.34<br>(1.73) | 2.46<br>(1.80) | 0.98 | 0.98 | 0.97 | 0.98 (0.95-<br>0.99) | 0.97 (0.93-<br>0.99) | 0.97 (0.93-<br>0.99) |
| Right pars triangularis                 | 13.99<br>(2.06) | 14.05<br>(2.05) | 13.97<br>(1.97) | 13.99<br>(2.04) | 14.75 | 14.58 | 14.13 | 14.60 | -0.83<br>(0.41) | 0.27<br>(0.79)  | 0.10<br>(0.92)  | 0.46<br>(2.31)  | -0.11<br>(3.38) | -0.04<br>(2.45) | 1.85<br>(1.39) | 2.74<br>(1.89) | 1.66<br>(1.76) | 0.99 | 0.97 | 0.99 | 0.99 (0.97-<br>0.99) | 0.98 (0.94-<br>0.99) | 0.99 (0.97-<br>1.00) |
| Right pericalcarine cortex              | 14.93<br>(2.38) | 14.54<br>(2.56) | 14.57<br>(2.33) | 14.66<br>(2.38) | 15.93 | 17.63 | 15.96 | 16.25 | 1.49<br>(0.15)  | 2.29<br>(0.03)  | 1.83<br>(0.08)  | -2.85<br>(8.86) | -2.36<br>(4.85) | -1.83<br>(4.77) | 4.77<br>(7.94) | 3.39<br>(4.17) | 3.06<br>(4.06) | 0.89 | 0.95 | 0.96 | 0.88 (0.73-<br>0.95) | 0.95 (0.85-<br>0.98) | 0.96 (0.89-<br>0.98) |
| Right postcentral gyrus                 | 37.87<br>(4.99) | 37.79<br>(4.97) | 37.76<br>(4.94) | 37.84<br>(4.88) | 13.18 | 13.15 | 13.09 | 12.89 | 0.75<br>(0.46)  | 1.09<br>(0.29)  | 0.31<br>(0.76)  | -0.20<br>(1.32) | -0.29<br>(1.31) | -0.05<br>(1.26) | 1.05<br>(0.79) | 0.90<br>(0.98) | 0.92<br>(0.84) | 1.00 | 1.00 | 1.00 | 1.00 (0.99-<br>1.00) | 1.00 (0.99-<br>1.00) | 1.00 (0.99-<br>1.00) |
| Right posterior cingulate cortex        | 10.89<br>(1.57) | 11.03<br>(1.58) | 11.02<br>(1.45) | 10.93<br>(1.48) | 14.40 | 14.31 | 13.15 | 13.54 | -0.96<br>(0.35) | -0.97<br>(0.34) | -0.30<br>(0.77) | 1.23<br>(6.57)  | 1.28<br>(5.90)  | 0.38<br>(5.71)  | 4.71<br>(4.64) | 3.93<br>(4.50) | 3.79<br>(4.21) | 0.91 | 0.92 | 0.93 | 0.91 (0.80-<br>0.96) | 0.92 (0.82-<br>0.97) | 0.94 (0.85-<br>0.97) |
| Right precentral gyrus                  | 46.31<br>(5.24) | 46.22<br>(5.14) | 46.04<br>(5.18) | 46.17<br>(5.28) | 11.31 | 11.13 | 11.25 | 11.43 | 0.67<br>(0.51)  | 1.39<br>(0.18)  | 0.53<br>(0.60)  | -0.18<br>(1.30) | -0.57<br>(1.91) | -0.30<br>(2.51) | 1.03<br>(0.79) | 1.20<br>(1.57) | 1.50<br>(2.00) | 0.99 | 0.99 | 0.98 | 0.99 (0.98-<br>1.00) | 0.98 (0.96-<br>0.99) | 0.98 (0.94-<br>0.99) |
| Right precuneus                         | 36.95<br>(4.78) | 37.16<br>(5.12) | 36.89<br>(4.78) | 37.03<br>(4.89) | 12.93 | 13.77 | 12.97 | 13.20 | -1.50<br>(0.15) | 0.51<br>(0.62)  | -0.78<br>(0.45) | 0.48<br>(1.51)  | -0.19<br>(1.47) | 0.18<br>(1.33)  | 1.13<br>(1.08) | 1.15<br>(0.91) | 0.93<br>(0.95) | 0.99 | 0.99 | 1.00 | 0.99 (0.98-<br>1.00) | 0.99 (0.98-<br>1.00) | 1.00 (0.99-<br>1.00) |
| Right rostral anterior cingulate cortex | 5.83<br>(1.32)  | 5.95<br>(1.38)  | 5.94<br>(1.41)  | 5.82<br>(1.28)  | 22.56 | 23.12 | 23.65 | 22.02 | -1.7            |                 |                 |                 |                 |                 |                |                |                |      |      |      |                      |                      |                      |

|                                        |                 |                 |                 |                 |       |       |       |       |                 |                 |                 |                 |                 |                 |                 |                |                |      |      |      |                   |                  |                  |
|----------------------------------------|-----------------|-----------------|-----------------|-----------------|-------|-------|-------|-------|-----------------|-----------------|-----------------|-----------------|-----------------|-----------------|-----------------|----------------|----------------|------|------|------|-------------------|------------------|------------------|
| Right frontal pole                     | 2.96<br>(0.39)  | 3.00<br>(0.35)  | 3.02<br>(0.42)  | 2.96<br>(0.32)  | 13.07 | 11.78 | 13.93 | 10.82 | -0.71<br>(0.48) | -1.61<br>(0.12) | 0.01<br>(0.99)  | 1.36<br>(8.39)  | 1.76<br>(5.72)  | 0.24<br>(6.99)  | 6.51<br>(5.27)  | 4.00<br>(4.38) | 5.47<br>(4.19) | 0.81 | 0.93 | 0.87 | 0.81 (0.59-0.92)  | 0.92 (0.81-0.97) | 0.86 (0.68-0.94) |
| Right temporal pole                    | 4.42<br>(0.54)  | 4.41<br>(0.61)  | 4.37<br>(0.58)  | 4.47<br>(0.55)  | 12.16 | 13.79 | 13.25 | 12.39 | 0.20<br>(0.84)  | 0.87<br>(0.39)  | -0.82<br>(0.42) | -0.42<br>(7.33) | -1.37<br>(6.56) | 0.98<br>(5.73)  | 5.19<br>(5.05)  | 4.97<br>(4.37) | 4.47<br>(3.58) | 0.87 | 0.87 | 0.90 | 0.87 (0.70-0.94)  | 0.87 (0.72-0.95) | 0.90 (0.77-0.96) |
| Right transverse temporal gyrus        | 3.24<br>(0.46)  | 3.19<br>(0.44)  | 3.19<br>(0.47)  | 3.21<br>(0.48)  | 14.30 | 13.95 | 14.88 | 14.82 | 1.51<br>(0.15)  | 1.43<br>(0.17)  | 0.96<br>(0.35)  | -1.58<br>(5.10) | -1.72<br>(4.87) | -1.10<br>(4.81) | 3.88<br>(3.59)  | 4.11<br>(3.02) | 4.20<br>(2.44) | 0.94 | 0.94 | 0.95 | 0.94 (0.85-0.97)  | 0.93 (0.84-0.97) | 0.95 (0.87-0.98) |
| Right insula                           | 23.35<br>(2.22) | 22.77<br>(2.71) | 23.02<br>(2.80) | 23.43<br>(2.79) | 9.52  | 11.92 | 12.14 | 11.89 | 1.56<br>(0.14)  | 0.91<br>(0.37)  | -0.20<br>(0.84) | -2.71<br>(7.11) | -1.67<br>(6.83) | 0.12<br>(7.76)  | 5.34<br>(5.33)  | 5.22<br>(4.58) | 6.05<br>(4.67) | 0.78 | 0.81 | 0.75 | 0.75 (0.49-0.89)  | 0.79 (0.55-0.91) | 0.74 (0.46-0.89) |
| <b>Local cortical thickness (mm)</b>   |                 |                 |                 |                 |       |       |       |       |                 |                 |                 |                 |                 |                 |                 |                |                |      |      |      |                   |                  |                  |
| Left banks superior temporal sulcus    | 2.50<br>(0.14)  | 2.49<br>(0.14)  | 2.50<br>(0.15)  | 2.50<br>(0.14)  | 5.59  | 5.78  | 5.99  | 5.51  | 1.27<br>(0.22)  | 0.33<br>(0.75)  | 0.52<br>(0.61)  | -0.72<br>(2.51) | -0.10<br>(1.12) | -0.19<br>(1.62) | 1.72<br>(1.93)  | 0.97<br>(0.52) | 1.20<br>(1.07) | 0.90 | 0.98 | 0.95 | 0.89 (0.76-0.96)  | 0.98 (0.96-0.99) | 0.96 (0.90-0.98) |
| Left caudal anterior cingulate cortex  | 2.66<br>(0.28)  | 2.62<br>(0.25)  | 2.66<br>(0.26)  | 2.64<br>(0.25)  | 10.62 | 9.62  | 9.90  | 9.46  | 1.86<br>(0.08)  | -0.21<br>(0.84) | 0.64<br>(0.53)  | -1.23<br>(3.05) | 0.24<br>(3.56)  | -0.39<br>(3.37) | 2.43<br>(2.16)  | 2.65<br>(2.31) | 2.69<br>(1.98) | 0.95 | 0.93 | 0.94 | 0.94 (0.86-0.98)  | 0.94 (0.85-0.97) | 0.94 (0.86-0.97) |
| Left caudal middle frontal gyrus       | 2.44<br>(0.12)  | 2.44<br>(0.11)  | 2.45<br>(0.12)  | 2.44<br>(0.12)  | 4.80  | 4.65  | 4.92  | 4.78  | -0.03<br>(0.98) | -0.17<br>(0.87) | 0.58<br>(0.57)  | 0.02<br>(1.74)  | 0.06<br>(1.71)  | -0.19<br>(1.52) | 1.38<br>(1.02)  | 1.40<br>(0.93) | 1.05<br>(1.08) | 0.93 | 0.94 | 0.95 | 0.93 (0.84-0.97)  | 0.94 (0.86-0.98) | 0.95 (0.89-0.98) |
| Left cuneus                            | 1.80<br>(0.10)  | 1.83<br>(0.17)  | 1.80<br>(0.10)  | 1.81<br>(0.12)  | 5.38  | 9.05  | 5.42  | 6.45  | -1.16<br>(0.26) | -0.46<br>(0.65) | -1.23<br>(0.23) | 1.82<br>(7.08)  | 0.29<br>(2.83)  | 1.00<br>(3.79)  | 2.66<br>(6.80)  | 1.52<br>(2.38) | 1.80<br>(3.47) | 0.47 | 0.86 | 0.79 | 0.41 (-0.01-0.71) | 0.86 (0.69-0.94) | 0.77 (0.53-0.90) |
| Left entorhinal cortex                 | 3.43<br>(0.27)  | 3.41<br>(0.27)  | 3.41<br>(0.27)  | 3.44<br>(0.27)  | 7.99  | 7.93  | 7.85  | 7.82  | 1.09<br>(0.29)  | 0.75<br>(0.46)  | -0.16<br>(0.87) | -0.65<br>(2.85) | -0.60<br>(3.79) | 0.11<br>(2.67)  | 2.22<br>(1.84)  | 3.09<br>(2.17) | 2.15<br>(1.51) | 0.94 | 0.89 | 0.95 | 0.94 (0.86-0.97)  | 0.89 (0.76-0.96) | 0.95 (0.88-0.98) |
| Left fusiform gyrus                    | 2.69<br>(0.16)  | 2.68<br>(0.16)  | 2.67<br>(0.14)  | 2.67<br>(0.16)  | 5.78  | 5.99  | 5.22  | 6.03  | 0.85<br>(0.40)  | 1.73<br>(0.10)  | 1.68<br>(0.11)  | -0.29<br>(1.56) | -0.50<br>(1.42) | -0.45<br>(1.19) | 1.28<br>(0.89)  | 1.15<br>(0.95) | 1.01<br>(0.75) | 0.97 | 0.97 | 0.98 | 0.97 (0.92-0.99)  | 0.96 (0.91-0.99) | 0.98 (0.94-0.99) |
| Left inferior parietal cortex          | 2.32<br>(0.14)  | 2.32<br>(0.14)  | 2.32<br>(0.14)  | 2.33<br>(0.13)  | 5.86  | 6.07  | 5.92  | 5.71  | 0.75<br>(0.46)  | -0.54<br>(0.60) | -0.74<br>(0.47) | -0.26<br>(1.51) | 0.11<br>(0.98)  | 0.23<br>(1.40)  | 1.00<br>(1.14)  | 0.84<br>(0.48) | 1.05<br>(0.93) | 0.97 | 0.99 | 0.97 | 0.97 (0.92-0.99)  | 0.99 (0.97-0.99) | 0.97 (0.93-0.99) |
| Left inferior temporal gyrus           | 2.75<br>(0.13)  | 2.74<br>(0.14)  | 2.76<br>(0.12)  | 2.74<br>(0.12)  | 4.57  | 4.96  | 4.20  | 4.43  | 0.70<br>(0.49)  | -0.46<br>(0.65) | 1.69<br>(0.11)  | -0.27<br>(1.73) | 0.15<br>(1.35)  | -0.43<br>(1.16) | 1.15<br>(1.30)  | 1.04<br>(0.85) | 0.95<br>(0.77) | 0.94 | 0.95 | 0.97 | 0.94 (0.86-0.97)  | 0.95 (0.89-0.98) | 0.96 (0.91-0.99) |
| Left isthmus cingulate cortex          | 2.34<br>(0.11)  | 2.35<br>(0.12)  | 2.35<br>(0.10)  | 2.38<br>(0.12)  | 4.70  | 5.13  | 4.43  | 5.13  | -0.40<br>(0.69) | -0.17<br>(0.87) | -1.94<br>(0.07) | 0.24<br>(2.96)  | 0.12<br>(3.07)  | 1.47<br>(3.51)  | 2.16<br>(1.98)  | 2.54<br>(1.64) | 2.77<br>(2.56) | 0.82 | 0.77 | 0.75 | 0.82 (0.62-0.93)  | 0.78 (0.52-0.90) | 0.72 (0.42-0.88) |
| Left lateral occipital cortex          | 2.09<br>(0.12)  | 2.11<br>(0.12)  | 2.09<br>(0.11)  | 2.10<br>(0.11)  | 5.57  | 5.58  | 5.38  | 5.36  | -1.24<br>(0.23) | -0.12<br>(0.91) | -1.44<br>(0.17) | 0.93<br>(3.38)  | 0.06<br>(2.02)  | 0.59<br>(1.86)  | 1.90<br>(2.93)  | 1.50<br>(1.32) | 1.21<br>(1.52) | 0.81 | 0.93 | 0.94 | 0.80 (0.58-0.91)  | 0.93 (0.84-0.97) | 0.94 (0.86-0.98) |
| Left lateral orbitofrontal cortex      | 2.63<br>(0.15)  | 2.62<br>(0.14)  | 2.62<br>(0.14)  | 2.62<br>(0.14)  | 5.60  | 5.38  | 5.38  | 5.19  | 0.52<br>(0.61)  | 0.38<br>(0.71)  | 0.53<br>(0.60)  | -0.19<br>(1.81) | -0.08<br>(1.18) | -0.19<br>(1.82) | 1.31<br>(1.24)  | 0.80<br>(0.85) | 1.31<br>(1.24) | 0.95 | 0.98 | 0.94 | 0.95 (0.87-0.98)  | 0.98 (0.95-0.99) | 0.94 (0.87-0.98) |
| Left lingual gyrus                     | 1.95<br>(0.09)  | 1.95<br>(0.08)  | 1.94<br>(0.09)  | 1.95<br>(0.10)  | 4.79  | 4.11  | 4.48  | 4.98  | -0.61<br>(0.55) | 0.27<br>(0.79)  | -0.51<br>(0.62) | 0.29<br>(1.99)  | -0.10<br>(1.97) | 0.19<br>(1.80)  | 1.52<br>(1.27)  | 1.62<br>(1.06) | 1.19<br>(1.33) | 0.91 | 0.91 | 0.93 | 0.90 (0.78-0.96)  | 0.91 (0.80-0.96) | 0.94 (0.85-0.97) |
| Left medial orbitofrontal cortex       | 2.28<br>(0.16)  | 2.29<br>(0.17)  | 2.29<br>(0.17)  | 2.29<br>(0.17)  | 7.01  | 7.53  | 7.54  | 7.32  | -0.66<br>(0.52) | -1.11<br>(0.28) | -0.94<br>(0.36) | 0.29<br>(2.22)  | 0.68<br>(2.84)  | 0.37<br>(1.87)  | 1.69<br>(1.42)  | 2.31<br>(1.72) | 1.54<br>(1.07) | 0.95 | 0.92 | 0.97 | 0.95 (0.89-0.98)  | 0.92 (0.81-0.97) | 0.96 (0.92-0.99) |
| Left middle temporal gyrus             | 2.77<br>(0.08)  | 2.76<br>(0.08)  | 2.76<br>(0.08)  | 2.76<br>(0.08)  | 2.80  | 2.95  | 2.75  | 2.93  | 0.95<br>(0.35)  | 0.83<br>(0.42)  | 1.53<br>(0.14)  | -0.44<br>(2.11) | -0.28<br>(1.57) | -0.52<br>(1.54) | 1.46<br>(1.55)  | 1.23<br>(0.98) | 1.29<br>(0.96) | 0.73 | 0.84 | 0.86 | 0.73 (0.46-0.88)  | 0.84 (0.66-0.93) | 0.85 (0.66-0.93) |
| Left parahippocampal gyrus             | 2.83<br>(0.32)  | 2.79<br>(0.31)  | 2.81<br>(0.31)  | 2.81<br>(0.32)  | 11.47 | 11.06 | 10.97 | 11.35 | 2.55<br>(0.02)  | 1.31<br>(0.21)  | 1.43<br>(0.17)  | -1.38<br>(2.56) | -0.47<br>(1.83) | -0.67<br>(2.22) | 2.20<br>(1.86)  | 1.58<br>(0.98) | 1.89<br>(1.29) | 0.98 | 0.99 | 0.98 | 0.97 (0.90-0.99)  | 0.99 (0.97-0.99) | 0.98 (0.95-0.99) |
| Left paracentral lobule                | 2.32<br>(0.14)  | 2.31<br>(0.13)  | 2.32<br>(0.14)  | 2.31<br>(0.13)  | 5.85  | 5.76  | 6.08  | 5.72  | 0.50<br>(0.62)  | -0.07<br>(0.95) | 0.47<br>(0.64)  | -0.27<br>(2.41) | 0.01<br>(1.97)  | -0.19<br>(1.87) | 1.94<br>(1.38)  | 1.37<br>(1.38) | 1.45<br>(1.16) | 0.91 | 0.95 | 0.95 | 0.91 (0.80-0.96)  | 0.95 (0.89-0.98) | 0.95 (0.88-0.98) |
| Left pars opercularis                  | 2.50<br>(0.13)  | 2.48<br>(0.11)  | 2.50<br>(0.12)  | 2.49<br>(0.12)  | 5.29  | 4.62  | 4.66  | 4.90  | 1.06<br>(0.30)  | 0.48<br>(0.64)  | 0.85<br>(0.41)  | -0.58<br>(2.54) | -0.14<br>(1.63) | -0.30<br>(1.69) | 1.38<br>(2.19)  | 1.20<br>(1.08) | 1.25<br>(1.15) | 0.87 | 0.95 | 0.95 | 0.86 (0.68-0.94)  | 0.95 (0.87-0.98) | 0.94 (0.87-0.98) |
| Left pars orbitalis                    | 2.68<br>(0.17)  | 2.68<br>(0.18)  | 2.68<br>(0.19)  | 2.68<br>(0.19)  | 6.48  | 6.90  | 6.92  | 7.16  | -0.07<br>(0.95) | -0.20<br>(0.84) | -0.26<br>(0.80) | 0.03<br>(3.04)  | 0.06<br>(1.83)  | 0.10<br>(2.54)  | 2.34<br>(1.87)  | 1.48<br>(1.03) | 1.91<br>(1.62) | 0.89 | 0.96 | 0.93 | 0.90 (0.76-0.96)  | 0.96 (0.91-0.98) | 0.93 (0.84-0.97) |
| Left pars triangularis                 | 2.37<br>(0.16)  | 2.36<br>(0.16)  | 2.37<br>(0.14)  | 2.38<br>(0.16)  | 6.87  | 6.76  | 6.05  | 6.52  | 0.63<br>(0.54)  | 0.12<br>(0.91)  | -1.01<br>(0.33) | -0.37<br>(2.71) | 0.00<br>(2.10)  | 0.35<br>(1.51)  | 2.06<br>(1.73)  | 1.64<br>(1.25) | 1.21<br>(0.94) | 0.92 | 0.95 | 0.98 | 0.92 (0.82-0.97)  | 0.95 (0.88-0.98) | 0.97 (0.94-0.99) |
| Left pericalcarine cortex              | 1.56<br>(0.10)  | 1.60<br>(0.17)  | 1.56<br>(0.09)  | 1.58<br>(0.10)  | 6.73  | 10.81 | 5.72  | 6.52  | -1.12<br>(0.28) | -0.20<br>(0.84) | -1.91<br>(0.07) | 2.68<br>(10.62) | 0.21<br>(3.49)  | 1.41<br>(3.42)  | 4.19<br>(10.09) | 2.43<br>(2.46) | 2.43<br>(2.76) | 0.10 | 0.86 | 0.87 | 0.09 (-0.34-0.49) | 0.86 (0.68-0.94) | 0.86 (0.68-0.94) |
| Left postcentral gyrus                 | 1.96<br>(0.11)  | 1.96<br>(0.12)  | 1.96<br>(0.12)  | 1.96<br>(0.12)  | 5.86  | 6.21  | 6.07  | 6.18  | -0.30<br>(0.77) | -0.02<br>(0.99) | -0.96<br>(0.35) | 0.11<br>(1.93)  | -0.01<br>(1.20) | 0.19<br>(1.01)  | 1.39<br>(1.31)  | 0.83<br>(0.85) | 0.85<br>(0.53) | 0.95 | 0.98 | 0.99 | 0.95 (0.89-0.98)  | 0.98 (0.95-0.99) | 0.99 (0.97-0.99) |
| Left posterior cingulate cortex        | 2.46<br>(0.14)  | 2.44<br>(0.16)  | 2.45<br>(0.13)  | 2.44<br>(0.15)  | 5.55  | 6.64  | 5.37  | 5.99  | 1.04<br>(0.31)  | 0.99<br>(0.34)  | 1.24<br>(0.23)  | -0.75<br>(3.07) | -0.58<br>(2.71) | -0.75<br>(2.68) | 2.68<br>(1.58)  | 2.16<br>(1.67) | 2.09<br>(1.79) | 0.89 | 0.88 | 0.89 | 0.88 (0.73-0.95)  | 0.88 (0.72-0.95) | 0.89 (0.75-0.95) |
| Left precentral gyrus                  | 2.48<br>(0.14)  | 2.48<br>(0.15)  | 2.48<br>(0.15)  | 2.49<br>(0.15)  | 5.79  | 6.23  | 5.92  | 5.89  | 0.56<br>(0.58)  | 0.37<br>(0.72)  | -0.28<br>(0.78) | -0.28<br>(2.27) | -0.11<br>(1.35) | 0.09<br>(1.57)  | 1.30<br>(1.86)  | 0.98<br>(0.91) | 1.20<br>(0.98) | 0.94 | 0.97 | 0.97 | 0.94 (0.86-0.97)  | 0.98 (0.94-0.99) | 0.97 (0.92-0.99) |
| Left precuneus                         | 2.28<br>(0.15)  | 2.28<br>(0.15)  | 2.28<br>(0.16)  | 2.28<br>(0.15)  | 6.58  | 6.73  | 7.04  | 6.77  | 0.62<br>(0.54)  | 0.81<br>(0.43)  | 0.75<br>(0.46)  | -0.20<br>(1.47) | -0.29<br>(1.43) | -0.23<br>(1.37) | 1.20<br>(0.82)  | 1.16<br>(0.84) | 1.09<br>(0.83) | 0.98 | 0.98 | 0.98 | 0.98 (0.94-0.99)  | 0.98 (0.95-0.99) | 0.98 (0.95-0.99) |
| Left rostral anterior cingulate cortex | 2.62<br>(0.21)  | 2.61<br>(0.19)  | 2.58<br>(0.17)  | 2.60<br>(0.17)  | 7.87  | 7.39  | 6.42  | 6.68  | 0.90<br>(0.38)  | 2.24<br>(0.04)  | 1.22<br>(0.24)  | -0.54<br>(2.90) | -1.38<br>(2.85) | -0.91<br>(3.58) | 2.23<br>(1.86)  | 2.40<br>(2.02) | 3.12<br>(1.86) | 0.93 | 0.93 | 0.88 | 0.93 (0.83-0.97)  | 0.90 (0.74-0.96) | 0.87 (0.71-0.94) |
| Left rostral middle frontal gyrus      | 2.25<br>(0.12)  | 2.25<br>(0.11)  | 2.26<br>(0.11)  | 2.25<br>(0.12)  | 5.41  | 5.06  | 4.91  | 5.43  | 0.67<br>(0.51)  | -0.44<br>(0.66) | 0.61<br>(0.55)  | -0.31<br>(2.20) | 0.17<br>(1.48)  | -0.24<br>(1.77) | 1.39<br>(1.71)  | 1.17<br>(0.88) | 1.44<br>(1.00) | 0.91 | 0.96 | 0.95 | 0.91 (0.79-0.96)  | 0.96 (0.91-0.98) | 0.95 (0.88-0.98) |
| Left superior frontal gyrus            | 2.52<br>(0.11)  | 2.51<br>(0.11)  | 2.51<br>(0.11)  | 2.52<br>(0.11)  | 4.37  | 4.29  | 4.46  | 4.37  | 0.63<br>(0.54)  | 0.65<br>(0.52)  | -0.15<br>(0.89) | -0.29<br>(2.15) | -0.23<br>(1.63) | 0.04<br>(1.12)  | 1.28<br>(1.73)  | 1.37<br>(0.86) | 0.91<br>(0.62) | 0.88 | 0.93 | 0.97 | 0.88 (0.73-0.95)  | 0.94 (0.85-0.97) | 0.97 (0.92-0.99) |
| Left superior parietal cortex          | 2.11<br>(0.15)  | 2.11<br>(0.15)  | 2.11<br>(0.15)  | 2.12<br>(0.14)  | 7.19  | 7.22  | 6.98  | 6.72  | -0.02<br>(0.98) | -1.71<br>(0.10) | -2.30<br>(0.03) | 0.01<br>(1.31)  | 0.25<br>(0.64)  | 0.53<br>(1.00)  | 0.93<br>(0.90)  | 0.53<br>(0.42) | 0.96<br>(0.58) | 0.98 | 1.00 | 0.99 | 0.98 (0.96-0.99)  | 1.00 (0.99-1.00) | 0.99 (0.96-1.00) |
| Left superior temporal gyrus           | 2.62<br>(0.16)  | 2.62<br>(0.15)  | 2.62<br>(0.15)  | 2.62<br>(0.16)  | 5.93  | 5.78  | 5.74  | 5.95  | 0.12<br>(0.91)  | 1.03<br>(0.32)  | 0.28<br>(0.78)  | -0.02<br>(1.23) | -0.21<br>(0.99) | -0.05<br>(0.89) | 0.72<br>(0.98)  | 0.76<br>(0.65) | 0.73<br>(0.49) | 0.98 | 0.99 | 0.99 | 0.98 (0.95-0.99)  | 0.99 (0.97-0.99) | 0.99 (0.97-1.00) |
| Left supramarginal gyrus               | 2.43<br>(0.12)  | 2.42<br>(0.14)  | 2.43<br>(0.12)  | 2.43<br>(0.12)  | 5.10  | 5.78  | 5.00  | 4.96  | 0.61<br>(0.55)  | -0.57<br>(0.57) | -0.42<br>(0.68) | -0.33<br>(2.28) | 0.21<br>(1.64)  | 0.15<br>(1.56)  | 1.36<br>(1.84)  | 1.19<br>(1.12) | 1.21<br>(0.97) | 0.93 | 0.95 | 0.95 | 0.92 (0.82-0.97)  | 0.95 (0.88-0.98) | 0.96 (0.89-0.98) |
| Left frontal pole                      | 2.58<br>(0.19)  | 2.57<br>(0.21)  | 2.59<br>(0.18)  | 2.57<br>(0.21)  | 7.30  | 8.21  | 7.07  | 8.04  | 0.42<br>(0.68)  | -0.48<br>(0.64) | 0.51<br>(0.62)  | -0.44<br>(3.89) | 0.46<br>(4.36)  | -0.39<br>(3.02) | 3.00<br>(2.43)  | 2.90<br>(3.23) | 2.20<br>(2.04) | 0.87 | 0.82 | 0.92 | 0.87 (0.71-0.95)  | 0.83 (0.63-0.93) | 0.92 (0.82-0.97) |
| Left temporal pole                     | 3.74<br>(0.28)  | 3.70<br>(0.30)  | 3.72<br>(0.27)  | 3.70<br>(0.31)  | 7.44  | 8.12  | 7.33  | 8.38  | 1.23<br>(0.23)  | 0.43<br>(0.67)  | 0.93<br>(0.37)  | -1.13<br>(4.14) | -0.41<br>(4.57) | -0.97<br>(4.62) | 2.73<br>(3.26)  | 3.47<br>(2.    |                |      |      |      |                   |                  |                  |

|                                         |                   |                   |                   |                   |       |       |       |        |                 |                 |                 |                 |                 |                 |                |                |                |      |      |      |                      |                      |                      |
|-----------------------------------------|-------------------|-------------------|-------------------|-------------------|-------|-------|-------|--------|-----------------|-----------------|-----------------|-----------------|-----------------|-----------------|----------------|----------------|----------------|------|------|------|----------------------|----------------------|----------------------|
| Right caudal anterior cingulate cortex  | 2.48<br>(0.24)    | 2.47<br>(0.25)    | 2.47<br>(0.23)    | 2.47<br>(0.23)    | 9.54  | 10.04 | 9.30  | 9.29   | 1.66<br>(0.11)  | 0.71<br>(0.49)  | 1.54<br>(0.14)  | -0.78<br>(1.94) | -0.45<br>(2.92) | -0.71<br>(2.12) | 1.68<br>(1.21) | 2.33<br>(1.75) | 1.72<br>(1.38) | 0.98 | 0.95 | 0.97 | 0.98 (0.94-<br>0.99) | 0.95 (0.88-<br>0.98) | 0.97 (0.93-<br>0.99) |
| Right caudal middle frontal gyrus       | 2.43<br>(0.11)    | 2.42<br>(0.12)    | 2.42<br>(0.12)    | 2.43<br>(0.12)    | 4.69  | 5.15  | 4.95  | 5.02   | 0.87<br>(0.39)  | 0.97<br>(0.35)  | 0.61<br>(0.55)  | -0.42<br>(2.08) | -0.43<br>(2.00) | -0.28<br>(1.94) | 1.41<br>(1.55) | 1.50<br>(1.36) | 1.53<br>(1.18) | 0.91 | 0.91 | 0.92 | 0.91 (0.79-<br>0.96) | 0.91 (0.80-<br>0.96) | 0.92 (0.82-<br>0.97) |
| Right cuneus                            | 1.82<br>(0.15)    | 1.84<br>(0.17)    | 1.83<br>(0.14)    | 1.83<br>(0.14)    | 8.21  | 9.39  | 7.88  | 7.75   | -1.07<br>(0.30) | -1.00<br>(0.33) | -1.90<br>(0.07) | 1.14<br>(4.62)  | 0.47<br>(1.96)  | 0.77<br>(0.93)  | 2.01<br>(4.30) | 1.36<br>(1.46) | 1.32<br>(1.58) | 0.83 | 0.97 | 0.98 | 0.82 (0.62-<br>0.92) | 0.97 (0.92-<br>0.99) | 0.97 (0.93-<br>0.99) |
| Right entorhinal cortex                 | 3.56<br>(0.30)    | 3.53<br>(0.28)    | 3.48<br>(0.34)    | 3.52<br>(0.33)    | 8.48  | 7.93  | 9.71  | 9.34   | 1.30<br>(0.21)  | 1.91<br>(0.07)  | 0.99<br>(0.34)  | -0.68<br>(2.62) | -2.27<br>(5.33) | -1.10<br>(5.01) | 2.22<br>(1.46) | 3.88<br>(4.25) | 3.03<br>(4.08) | 0.95 | 0.84 | 0.86 | 0.95 (0.88-<br>0.98) | 0.82 (0.60-<br>0.92) | 0.86 (0.69-<br>0.94) |
| Right fusiform gyrus                    | 2.68<br>(0.14)    | 2.66<br>(0.15)    | 2.68<br>(0.14)    | 2.68<br>(0.13)    | 5.21  | 5.46  | 5.24  | 4.95   | 1.71<br>(0.10)  | 0.16<br>(0.87)  | -0.61<br>(0.55) | -0.47<br>(1.23) | -0.05<br>(1.34) | 0.17<br>(1.18)  | 1.06<br>(0.75) | 1.11<br>(0.71) | 0.97<br>(0.66) | 0.97 | 0.97 | 0.97 | 0.97 (0.93-<br>0.99) | 0.97 (0.92-<br>0.99) | 0.97 (0.94-<br>0.99) |
| Right inferior parietal cortex          | 2.32<br>(0.14)    | 2.30<br>(0.14)    | 2.30<br>(0.13)    | 2.31<br>(0.15)    | 6.23  | 6.19  | 5.73  | 6.33   | 1.69<br>(0.11)  | 1.91<br>(0.07)  | 0.75<br>(0.46)  | -0.67<br>(1.85) | -0.63<br>(1.52) | -0.25<br>(1.43) | 1.41<br>(1.34) | 1.07<br>(1.24) | 1.12<br>(0.88) | 0.96 | 0.97 | 0.97 | 0.95 (0.89-<br>0.98) | 0.96 (0.90-<br>0.98) | 0.97 (0.94-<br>0.99) |
| Right inferior temporal gyrus           | 2.77<br>(0.12)    | 2.75<br>(0.13)    | 2.77<br>(0.12)    | 2.77<br>(0.12)    | 4.39  | 4.57  | 4.42  | 4.46   | 1.46<br>(0.16)  | 0.04<br>(0.97)  | 0.74<br>(0.47)  | -0.69<br>(2.23) | -0.02<br>(1.63) | -0.28<br>(1.69) | 1.36<br>(1.88) | 1.21<br>(1.06) | 1.10<br>(1.29) | 0.88 | 0.93 | 0.93 | 0.88 (0.73-<br>0.95) | 0.93 (0.85-<br>0.97) | 0.93 (0.83-<br>0.97) |
| Right isthmus cingulate cortex          | 2.37<br>(0.24)    | 2.38<br>(0.23)    | 2.34<br>(0.25)    | 2.35<br>(0.26)    | 10.17 | 9.69  | 10.70 | 11.17  | -0.53<br>(0.60) | 1.79<br>(0.09)  | 0.89<br>(0.38)  | 0.36<br>(2.67)  | -1.13<br>(3.04) | -0.81<br>(3.75) | 2.12<br>(1.59) | 1.98<br>(2.55) | 2.96<br>(2.35) | 0.97 | 0.97 | 0.94 | 0.97 (0.92-<br>0.99) | 0.96 (0.91-<br>0.98) | 0.94 (0.86-<br>0.98) |
| Right lateral occipital cortex          | 2.16<br>(0.12)    | 2.16<br>(0.11)    | 2.15<br>(0.12)    | 2.17<br>(0.12)    | 5.50  | 5.28  | 5.72  | 5.36   | -0.29<br>(0.78) | 1.22<br>(0.24)  | -1.15<br>(0.26) | 0.08<br>(1.12)  | -0.53<br>(2.06) | 0.24<br>(0.94)  | 0.82<br>(0.75) | 1.23<br>(1.72) | 0.76<br>(0.58) | 0.98 | 0.94 | 0.99 | 0.98 (0.95-<br>0.99) | 0.94 (0.85-<br>0.97) | 0.98 (0.96-<br>0.99) |
| Right lateral orbitofrontal cortex      | 2.58<br>(0.15)    | 2.54<br>(0.15)    | 2.53<br>(0.14)    | 2.56<br>(0.14)    | 5.71  | 5.86  | 5.37  | 5.56   | 4.03<br>(0.00)  | 3.53<br>(0.00)  | 1.91<br>(0.07)  | -1.91<br>(2.22) | -1.93<br>(2.51) | -0.91<br>(2.17) | 2.55<br>(1.40) | 2.39<br>(2.04) | 1.88<br>(1.37) | 0.93 | 0.90 | 0.92 | 0.89 (0.49-<br>0.96) | 0.85 (0.48-<br>0.95) | 0.91 (0.79-<br>0.97) |
| Right lingual gyrus                     | 2.01<br>(0.12)    | 2.01<br>(0.11)    | 2.01<br>(0.11)    | 2.01<br>(0.12)    | 6.18  | 5.54  | 5.57  | 6.07   | 0.07<br>(0.95)  | 0.23<br>(0.82)  | -0.32<br>(0.75) | 0.00<br>(2.53)  | -0.05<br>(1.79) | 0.11<br>(1.42)  | 1.64<br>(1.89) | 1.36<br>(1.13) | 1.10<br>(0.88) | 0.92 | 0.96 | 0.97 | 0.92 (0.80-<br>0.96) | 0.96 (0.90-<br>0.98) | 0.98 (0.94-<br>0.99) |
| Right medial orbitofrontal cortex       | 2.35<br>(0.14)    | 2.34<br>(0.15)    | 2.34<br>(0.15)    | 2.34<br>(0.15)    | 6.06  | 6.51  | 6.46  | 6.33   | 1.39<br>(0.18)  | 1.41<br>(0.17)  | 0.79<br>(0.44)  | -0.76<br>(2.33) | -0.72<br>(2.20) | -0.49<br>(2.80) | 1.88<br>(1.52) | 1.69<br>(1.53) | 2.23<br>(1.69) | 0.93 | 0.94 | 0.90 | 0.92 (0.82-<br>0.97) | 0.93 (0.84-<br>0.97) | 0.90 (0.78-<br>0.96) |
| Right middle temporal gyrus             | 2.79<br>(0.13)    | 2.79<br>(0.15)    | 2.79<br>(0.14)    | 2.79<br>(0.13)    | 4.55  | 5.37  | 5.06  | 4.73   | 0.00<br>(1.00)  | 0.46<br>(0.65)  | 0.16<br>(0.88)  | -0.04<br>(1.75) | -0.15<br>(1.28) | -0.06<br>(1.41) | 1.09<br>(1.35) | 0.89<br>(0.91) | 1.14<br>(0.80) | 0.96 | 0.97 | 0.96 | 0.95 (0.88-<br>0.98) | 0.97 (0.92-<br>0.99) | 0.96 (0.90-<br>0.98) |
| Right parahippocampal gyrus             | 2.73<br>(0.24)    | 2.72<br>(0.23)    | 2.71<br>(0.23)    | 2.71<br>(0.24)    | 8.74  | 8.56  | 8.33  | 8.70   | 0.77<br>(0.45)  | 1.47<br>(0.16)  | 1.58<br>(0.13)  | -0.41<br>(2.58) | -0.77<br>(2.42) | -0.80<br>(2.29) | 2.03<br>(1.57) | 1.98<br>(1.54) | 1.83<br>(1.55) | 0.96 | 0.96 | 0.96 | 0.96 (0.90-<br>0.98) | 0.95 (0.89-<br>0.98) | 0.96 (0.91-<br>0.98) |
| Right paracentral lobule                | 2.31<br>(0.14)    | 2.31<br>(0.15)    | 2.32<br>(0.15)    | 2.32<br>(0.15)    | 5.92  | 6.33  | 6.45  | 6.27   | 0.01<br>(1.00)  | -0.69<br>(0.50) | -0.90<br>(0.38) | -0.03<br>(1.74) | 0.25<br>(1.87)  | 0.25<br>(1.30)  | 1.35<br>(1.05) | 1.51<br>(1.09) | 1.03<br>(0.81) | 0.96 | 0.96 | 0.98 | 0.96 (0.91-<br>0.98) | 0.95 (0.89-<br>0.98) | 0.98 (0.94-<br>0.99) |
| Right pars opercularis                  | 2.53<br>(0.14)    | 2.52<br>(0.15)    | 2.53<br>(0.14)    | 2.53<br>(0.15)    | 5.69  | 6.04  | 5.62  | 6.06   | 0.97<br>(0.34)  | -0.35<br>(0.73) | -0.52<br>(0.61) | -0.42<br>(1.91) | 0.08<br>(1.02)  | 0.13<br>(1.37)  | 1.27<br>(1.46) | 0.81<br>(0.60) | 1.09<br>(0.81) | 0.95 | 0.98 | 0.98 | 0.95 (0.88-<br>0.98) | 0.98 (0.96-<br>0.99) | 0.97 (0.94-<br>0.99) |
| Right pars orbitalis                    | 2.65<br>(0.16)    | 2.65<br>(0.15)    | 2.65<br>(0.12)    | 2.68<br>(0.13)    | 6.07  | 5.82  | 4.70  | 4.92   | 0.40<br>(0.70)  | 0.21<br>(0.83)  | -2.13<br>(0.05) | -0.20<br>(2.58) | -0.03<br>(2.32) | 1.08<br>(2.28)  | 2.03<br>(1.54) | 1.80<br>(1.40) | 1.77<br>(1.77) | 0.91 | 0.94 | 0.94 | 0.91 (0.80-<br>0.96) | 0.92 (0.80-<br>0.96) | 0.91 (0.77-<br>0.96) |
| Right pars triangularis                 | 2.43<br>(0.14)    | 2.41<br>(0.15)    | 2.41<br>(0.13)    | 2.42<br>(0.15)    | 5.74  | 6.15  | 5.46  | 6.05   | 1.33<br>(0.20)  | 2.20<br>(0.04)  | 0.49<br>(0.63)  | -0.89<br>(3.03) | -0.62<br>(1.33) | -0.22<br>(1.91) | 2.04<br>(2.37) | 1.15<br>(0.88) | 1.49<br>(1.17) | 0.88 | 0.97 | 0.95 | 0.87 (0.71-<br>0.95) | 0.97 (0.91-<br>0.99) | 0.95 (0.88-<br>0.98) |
| Right pericalcarine cortex              | 1.63<br>(0.14)    | 1.63<br>(0.13)    | 1.63<br>(0.13)    | 1.63<br>(0.13)    | 8.64  | 7.87  | 8.29  | 7.78   | 0.42<br>(0.68)  | 0.32<br>(0.75)  | -0.53<br>(0.60) | -0.18<br>(2.65) | -0.12<br>(2.47) | 0.36<br>(2.56)  | 1.85<br>(1.86) | 1.60<br>(1.85) | 1.66<br>(1.94) | 0.96 | 0.97 | 0.96 | 0.95 (0.89-<br>0.98) | 0.97 (0.92-<br>0.99) | 0.96 (0.90-<br>0.98) |
| Right postcentral gyrus                 | 2.00<br>(0.11)    | 2.00<br>(0.12)    | 2.00<br>(0.12)    | 1.99<br>(0.11)    | 5.72  | 6.19  | 5.80  | 5.72   | 0.32<br>(0.75)  | -0.28<br>(0.78) | 0.87<br>(0.39)  | -0.16<br>(2.04) | 0.06<br>(1.04)  | -0.18<br>(0.96) | 1.11<br>(1.71) | 0.84<br>(0.59) | 0.81<br>(0.53) | 0.95 | 0.98 | 0.99 | 0.95 (0.88-<br>0.98) | 0.98 (0.96-<br>0.99) | 0.99 (0.97-<br>0.99) |
| Right posterior cingulate cortex        | 2.32<br>(0.16)    | 2.32<br>(0.14)    | 2.33<br>(0.14)    | 2.32<br>(0.15)    | 6.88  | 6.09  | 5.86  | 6.51   | 0.47<br>(0.64)  | -0.36<br>(0.72) | 0.01<br>(0.99)  | -0.23<br>(2.72) | 0.29<br>(2.91)  | 0.01<br>(3.59)  | 1.87<br>(1.95) | 2.07<br>(2.02) | 2.25<br>(2.75) | 0.92 | 0.91 | 0.86 | 0.92 (0.81-<br>0.97) | 0.90 (0.77-<br>0.96) | 0.87 (0.70-<br>0.94) |
| Right precentral gyrus                  | 2.46<br>(0.13)    | 2.47<br>(0.15)    | 2.46<br>(0.14)    | 2.46<br>(0.14)    | 5.31  | 5.95  | 5.51  | 5.57   | -1.46<br>(0.16) | -0.99<br>(0.33) | -0.90<br>(0.38) | 0.53<br>(1.77)  | 0.28<br>(1.32)  | 0.27<br>(1.45)  | 1.35<br>(1.23) | 1.18<br>(0.61) | 0.99<br>(1.07) | 0.96 | 0.97 | 0.97 | 0.95 (0.88-<br>0.98) | 0.97 (0.93-<br>0.99) | 0.96 (0.92-<br>0.99) |
| Right precuneus                         | 2.30<br>(0.17)    | 2.28<br>(0.16)    | 2.29<br>(0.17)    | 2.28<br>(0.17)    | 7.44  | 7.02  | 7.32  | 7.42   | 1.88<br>(0.07)  | 0.69<br>(0.50)  | 1.44<br>(0.16)  | -0.68<br>(1.70) | -0.21<br>(1.37) | -0.48<br>(1.49) | 1.14<br>(1.41) | 0.95<br>(1.00) | 0.99<br>(1.20) | 0.97 | 0.98 | 0.98 | 0.97 (0.92-<br>0.99) | 0.98 (0.96-<br>0.99) | 0.98 (0.95-<br>0.99) |
| Right rostral anterior cingulate cortex | 2.87<br>(0.18)    | 2.83<br>(0.18)    | 2.82<br>(0.21)    | 2.87<br>(0.19)    | 6.43  | 6.47  | 7.31  | 6.70   | 2.33<br>(0.03)  | 2.41<br>(0.03)  | 0.17<br>(0.86)  | -1.52<br>(3.10) | -1.74<br>(3.16) | -0.13<br>(3.10) | 2.62<br>(2.20) | 2.72<br>(2.31) | 2.63<br>(1.55) | 0.89 | 0.90 | 0.89 | 0.87 (0.68-<br>0.95) | 0.87 (0.67-<br>0.95) | 0.89 (0.76-<br>0.96) |
| Right rostral middle frontal gyrus      | 2.27<br>(0.13)    | 2.26<br>(0.13)    | 2.27<br>(0.13)    | 2.27<br>(0.14)    | 5.86  | 5.75  | 5.57  | 6.05   | 0.97<br>(0.34)  | -0.62<br>(0.54) | 0.32<br>(0.75)  | -0.42<br>(1.93) | 0.20<br>(1.35)  | -0.11<br>(1.50) | 1.17<br>(1.57) | 1.04<br>(0.85) | 1.19<br>(0.88) | 0.94 | 0.97 | 0.97 | 0.94 (0.86-<br>0.98) | 0.97 (0.94-<br>0.99) | 0.97 (0.93-<br>0.99) |
| Right superior frontal gyrus            | 2.54<br>(0.13)    | 2.53<br>(0.14)    | 2.54<br>(0.14)    | 2.54<br>(0.14)    | 5.24  | 5.71  | 5.67  | 5.46   | 1.11<br>(0.28)  | 0.89<br>(0.38)  | 1.06<br>(0.30)  | -0.52<br>(2.12) | -0.33<br>(1.59) | -0.27<br>(1.15) | 1.42<br>(1.63) | 1.13<br>(1.14) | 0.94<br>(0.68) | 0.93 | 0.96 | 0.98 | 0.93 (0.84-<br>0.97) | 0.96 (0.90-<br>0.98) | 0.98 (0.95-<br>0.99) |
| Right superior parietal cortex          | 2.09<br>(0.16)    | 2.08<br>(0.15)    | 2.09<br>(0.16)    | 2.09<br>(0.16)    | 7.75  | 7.41  | 7.53  | 7.70   | 1.73<br>(0.10)  | 0.25<br>(0.81)  | 0.67<br>(0.51)  | -0.65<br>(1.90) | -0.05<br>(1.39) | -0.13<br>(0.98) | 1.23<br>(1.57) | 1.01<br>(0.92) | 0.82<br>(0.52) | 0.97 | 0.99 | 0.99 | 0.97 (0.93-<br>0.99) | 0.99 (0.96-<br>0.99) | 0.99 (0.98-<br>1.00) |
| Right superior temporal gyrus           | 2.66<br>(0.19)    | 2.64<br>(0.20)    | 2.65<br>(0.19)    | 2.66<br>(0.20)    | 7.21  | 7.55  | 7.17  | 7.40   | 1.18<br>(0.25)  | 0.68<br>(0.50)  | -0.31<br>(0.76) | -0.64<br>(2.43) | -0.18<br>(1.17) | 0.06<br>(1.08)  | 1.39<br>(2.08) | 0.75<br>(0.90) | 0.88<br>(0.60) | 0.95 | 0.99 | 0.99 | 0.95 (0.87-<br>0.98) | 0.99 (0.97-<br>0.99) | 0.99 (0.97-<br>1.00) |
| Right supramarginal gyrus               | 2.39<br>(0.13)    | 2.38<br>(0.15)    | 2.38<br>(0.12)    | 2.39<br>(0.14)    | 5.45  | 6.19  | 5.07  | 5.75   | 1.73<br>(0.10)  | 2.28<br>(0.03)  | 0.64<br>(0.53)  | -0.73<br>(1.99) | -0.46<br>(0.95) | -0.17<br>(1.10) | 1.18<br>(1.75) | 0.84<br>(0.62) | 0.82<br>(0.74) | 0.96 | 0.99 | 0.98 | 0.95 (0.87-<br>0.98) | 0.98 (0.94-<br>0.99) | 0.98 (0.96-<br>0.99) |
| Right frontal pole                      | 2.61<br>(0.17)    | 2.59<br>(0.15)    | 2.58<br>(0.22)    | 2.59<br>(0.19)    | 6.48  | 5.78  | 8.63  | 7.25   | 0.81<br>(0.43)  | 0.80<br>(0.43)  | 0.53<br>(0.60)  | -0.67<br>(3.93) | -1.31<br>(6.93) | -0.46<br>(3.50) | 2.47<br>(3.09) | 4.16<br>(5.62) | 2.98<br>(1.78) | 0.79 | 0.65 | 0.87 | 0.79 (0.55-<br>0.91) | 0.63 (0.28-<br>0.83) | 0.87 (0.71-<br>0.95) |
| Right temporal pole                     | 3.75<br>(0.29)    | 3.73<br>(0.33)    | 3.75<br>(0.32)    | 3.74<br>(0.32)    | 7.81  | 8.79  | 8.57  | 8.44   | 0.57<br>(0.58)  | 0.04<br>(0.97)  | 0.23<br>(0.82)  | -0.60<br>(4.37) | -0.09<br>(3.49) | -0.25<br>(3.93) | 2.97<br>(3.19) | 2.35<br>(2.53) | 2.59<br>(2.91) | 0.89 | 0.91 | 0.89 | 0.89 (0.74-<br>0.95) | 0.91 (0.80-<br>0.96) | 0.89 (0.75-<br>0.95) |
| Right transverse temporal gyrus         | 2.29<br>(0.23)    | 2.29<br>(0.23)    | 2.31<br>(0.24)    | 2.32<br>(0.24)    | 10.10 | 10.03 | 10.38 | 10.14  | 0.28<br>(0.78)  | -1.03<br>(0.32) | -2.38<br>(0.03) | -0.17<br>(2.67) | 0.52<br>(2.47)  | 1.05<br>(1.96)  | 1.94<br>(1.80) | 2.04<br>(1.42) | 1.70<br>(1.41) | 0.96 | 0.97 | 0.98 | 0.96 (0.91-<br>0.98) | 0.97 (0.93-<br>0.99) | 0.98 (0.93-<br>0.99) |
| Right insula                            | 2.85<br>(0.16)    | 2.87<br>(0.16)    | 2.87<br>(0.15)    | 2.86<br>(0.19)    | 5.79  | 5.59  | 5.38  | 6.54   | -1.18<br>(0.25) | -1.27<br>(0.22) | -0.45<br>(0.65) | 0.73<br>(2.78)  | 0.61<br>(2.15)  | 0.25<br>(2.93)  | 2.22<br>(1.77) | 1.71<br>(1.40) | 2.24<br>(1.83) | 0.88 | 0.93 | 0.89 | 0.88 (0.73-<br>0.95) | 0.92 (0.83-<br>0.97) | 0.89 (0.75-<br>0.95) |
| <b>Global brain measures</b>            |                   |                   |                   |                   |       |       |       |        |                 |                 |                 |                 |                 |                 |                |                |                |      |      |      |                      |                      |                      |
| Left total cortical volume (ml)         | 211.74<br>(16.31) | 211.01<br>(17.60) | 211.56<br>(16.86) | 211.98<br>(16.86) | 7.70  | 8.34  | 7.97  | 7.96   | 1.02<br>(0.32)  | 0.62<br>(0.54)  | -1.04<br>(0.31) | -0.40<br>(1.70) | -0.11<br>(0.63) | 0.09<br>(0.49)  | 0.74<br>(1.58) | 0.41<br>(0.48) | 0.39<br>(0.31) | 0.98 | 1.00 | 1.00 | 0.98 (0.95-<br>0.99) | 1.00 (0.99-<br>1.00) | 1.00 (1.00-<br>1.00) |
| Right total cortical volume (ml)        | 212.77<br>(16.62) | 211.74<br>(18.22) | 212.29<br>(16.81) | 212.86<br>(16.91) | 7.81  | 8.61  | 7.92  | 7.94</ |                 |                 |                 |                 |                 |                 |                |                |                |      |      |      |                      |                      |                      |

|                                                      |                     |                     |                     |                             |       |       |       |       |                 |                 |                 |                  |                  |                      |                |                 |                     |      |      |      |                      |                      |                      |
|------------------------------------------------------|---------------------|---------------------|---------------------|-----------------------------|-------|-------|-------|-------|-----------------|-----------------|-----------------|------------------|------------------|----------------------|----------------|-----------------|---------------------|------|------|------|----------------------|----------------------|----------------------|
| Left total cortical surface area (cm <sup>2</sup> )  | 801.15<br>(76.01)   | 798.32<br>(79.37)   | 799.72<br>(76.51)   | 802.5<br>2<br>(77.01)       | 9.49  | 9.94  | 9.57  | 9.60  | 1.28<br>(0.22)  | 1.51<br>(0.15)  | -2.01<br>(0.06) | -0.40<br>(1.42)  | -0.19<br>(0.55)  | 0.16<br>(0.38)       | 0.68<br>(1.30) | 0.45<br>(0.35)  | 0.32<br>(0.25)      | 0.99 | 1.00 | 1.00 | 0.99 (0.98-<br>1.00) | 1.00 (1.00-<br>1.00) | 1.00 (1.00-<br>1.00) |
| Right total cortical surface area (cm <sup>2</sup> ) | 801.02<br>(73.78)   | 799.16<br>(77.17)   | 799.63<br>(73.67)   | 801.42<br>(73.10<br>)       | 9.21  | 9.66  | 9.21  | 9.12  | 0.86<br>(0.40)  | 1.34<br>(0.19)  | -0.36<br>(0.72) | -0.27<br>(1.36)  | -0.18<br>(0.60)  | 0.06<br>(0.64)       | 0.72<br>(1.17) | 0.48<br>(0.38)  | 0.48<br>(0.41)      | 0.99 | 1.00 | 1.00 | 0.99 (0.98-<br>1.00) | 1.00 (0.99-<br>1.00) | 1.00 (0.99-<br>1.00) |
| Left mean cortical thickness (mm)                    | 2.38<br>(0.09)      | 2.38<br>(0.09)      | 2.38<br>(0.09)      | 2.38<br>(0.10)              | 3.97  | 3.96  | 3.82  | 4.01  | 0.42<br>(0.68)  | 0.38<br>(0.71)  | -0.52<br>(0.61) | -0.07<br>(0.76)  | -0.05<br>(0.65)  | 0.06<br>(0.53)       | 0.53<br>(0.53) | 0.42<br>(0.49)  | 0.40<br>(0.35)      | 0.98 | 0.99 | 0.99 | 0.98 (0.96-<br>0.99) | 0.99 (0.97-<br>0.99) | 0.99 (0.98-<br>1.00) |
| Right mean cortical thickness (mm)                   | 2.39<br>(0.10)      | 2.38<br>(0.10)      | 2.39<br>(0.10)      | 2.39<br>(0.10)              | 4.26  | 4.36  | 4.20  | 4.36  | 1.47<br>(0.16)  | 1.35<br>(0.19)  | 0.63<br>(0.54)  | -0.36<br>(1.12)  | -0.22<br>(0.74)  | -0.09<br>(0.60)      | 0.61<br>(1.00) | 0.43<br>(0.63)  | 0.47<br>(0.37)      | 0.97 | 0.98 | 0.99 | 0.97 (0.92-<br>0.99) | 0.98 (0.96-<br>0.99) | 0.99 (0.98-<br>1.00) |
| Left cerebellar white matter (ml)                    | 14.97<br>(1.60)     | 14.84<br>(1.26)     | 15.01<br>(1.59)     | 14.58<br>(1.40)             | 10.66 | 8.46  | 10.62 | 9.58  | 0.83<br>(0.42)  | -0.37<br>(0.71) | 2.43<br>(0.02)  | -0.67<br>(4.53)  | 0.27<br>(3.34)   | -2.58<br>(5.03)      | 3.42<br>(2.96) | 2.61<br>(2.01)  | 4.10<br>(3.83)      | 0.90 | 0.95 | 0.88 | 0.88 (0.73-<br>0.95) | 0.95 (0.89-<br>0.98) | 0.85 (0.63-<br>0.94) |
| Right cerebellar white matter (ml)                   | 15.11<br>(2.82)     | 14.51<br>(1.14)     | 14.68<br>(1.69)     | 14.80<br>(3.70)             | 18.69 | 7.85  | 11.50 | 25.03 | 1.27<br>(0.22)  | 0.83<br>(0.42)  | 0.44<br>(0.67)  | -2.91<br>(11.13) | -2.01<br>(12.25) | -2.79<br>(15.32<br>) | 5.73<br>(9.92) | 5.41<br>(11.12) | 7.95<br>(13.29<br>) | 0.72 | 0.56 | 0.53 | 0.49 (0.10-<br>0.75) | 0.50 (0.09-<br>0.76) | 0.52 (0.11-<br>0.77) |
| Left cerebellar gray matter (ml)                     | 48.43<br>(2.68)     | 48.69<br>(2.90)     | 48.49<br>(2.79)     | 48.92<br>(2.80)             | 5.54  | 5.96  | 5.76  | 5.71  | -1.34<br>(0.20) | -0.48<br>(0.64) | -3.12<br>(0.01) | 0.51<br>(1.79)   | 0.12<br>(1.20)   | 1.01<br>(1.47)       | 1.16<br>(1.44) | 0.81<br>(0.87)  | 1.23<br>(1.27)      | 0.95 | 0.98 | 0.97 | 0.95 (0.88-<br>0.98) | 0.98 (0.94-<br>0.99) | 0.95 (0.82-<br>0.98) |
| Right cerebellar gray matter (ml)                    | 48.34<br>(2.44)     | 48.60<br>(2.50)     | 48.65<br>(2.42)     | 48.61<br>(3.31)             | 5.04  | 5.15  | 4.97  | 6.81  | -0.59<br>(0.56) | -0.76<br>(0.46) | -0.46<br>(0.65) | 0.51<br>(4.07)   | 0.63<br>(3.75)   | 0.43<br>(5.75)       | 1.78<br>(3.68) | 1.29<br>(3.57)  | 2.51<br>(5.16)      | 0.68 | 0.71 | 0.62 | 0.69 (0.37-<br>0.86) | 0.72 (0.42-<br>0.87) | 0.60 (0.23-<br>0.82) |
| Intracranial volume (ml)                             | 1494.49<br>(193.75) | 1485.25<br>(205.52) | 1489.70<br>(192.09) | 1517.7<br>5<br>(172.2<br>8) | 12.96 | 13.84 | 12.89 | 11.35 | 1.03<br>(0.31)  | 3.38<br>(0.00)  | -2.03<br>(0.06) | -0.76<br>(3.57)  | -0.31<br>(0.44)  | 1.75<br>(4.04)       | 1.21<br>(3.44) | 0.42<br>(0.34)  | 1.75<br>(4.04)      | 0.98 | 1.00 | 0.97 | 0.98 (0.95-<br>0.99) | 1.00 (1.00-<br>1.00) | 0.95 (0.88-<br>0.98) |
| Total brain volume without ventricles (ml)           | 1037.32<br>(91.14)  | 1031.95<br>(96.27)  | 1035.39<br>(92.84)  | 1036.8<br>9<br>(91.84<br>)  | 8.79  | 9.33  | 8.97  | 8.86  | 1.35<br>(0.19)  | 2.06<br>(0.05)  | 0.49<br>(0.63)  | -0.57<br>(1.92)  | -0.20<br>(0.42)  | -0.05<br>(0.37)      | 0.73<br>(1.86) | 0.35<br>(0.30)  | 0.28<br>(0.24)      | 0.98 | 1.00 | 1.00 | 0.98 (0.95-<br>0.99) | 1.00 (1.00-<br>1.00) | 1.00 (1.00-<br>1.00) |

Abbreviations: SD = standard deviation; Orig = original scan; FS df = FreeSurfer defacing; FSL df = FSL defacing; FM = Face Masking; t = t-statistic; p=p-value; PD = Average Percentage Difference; CI = Confidence Interval.



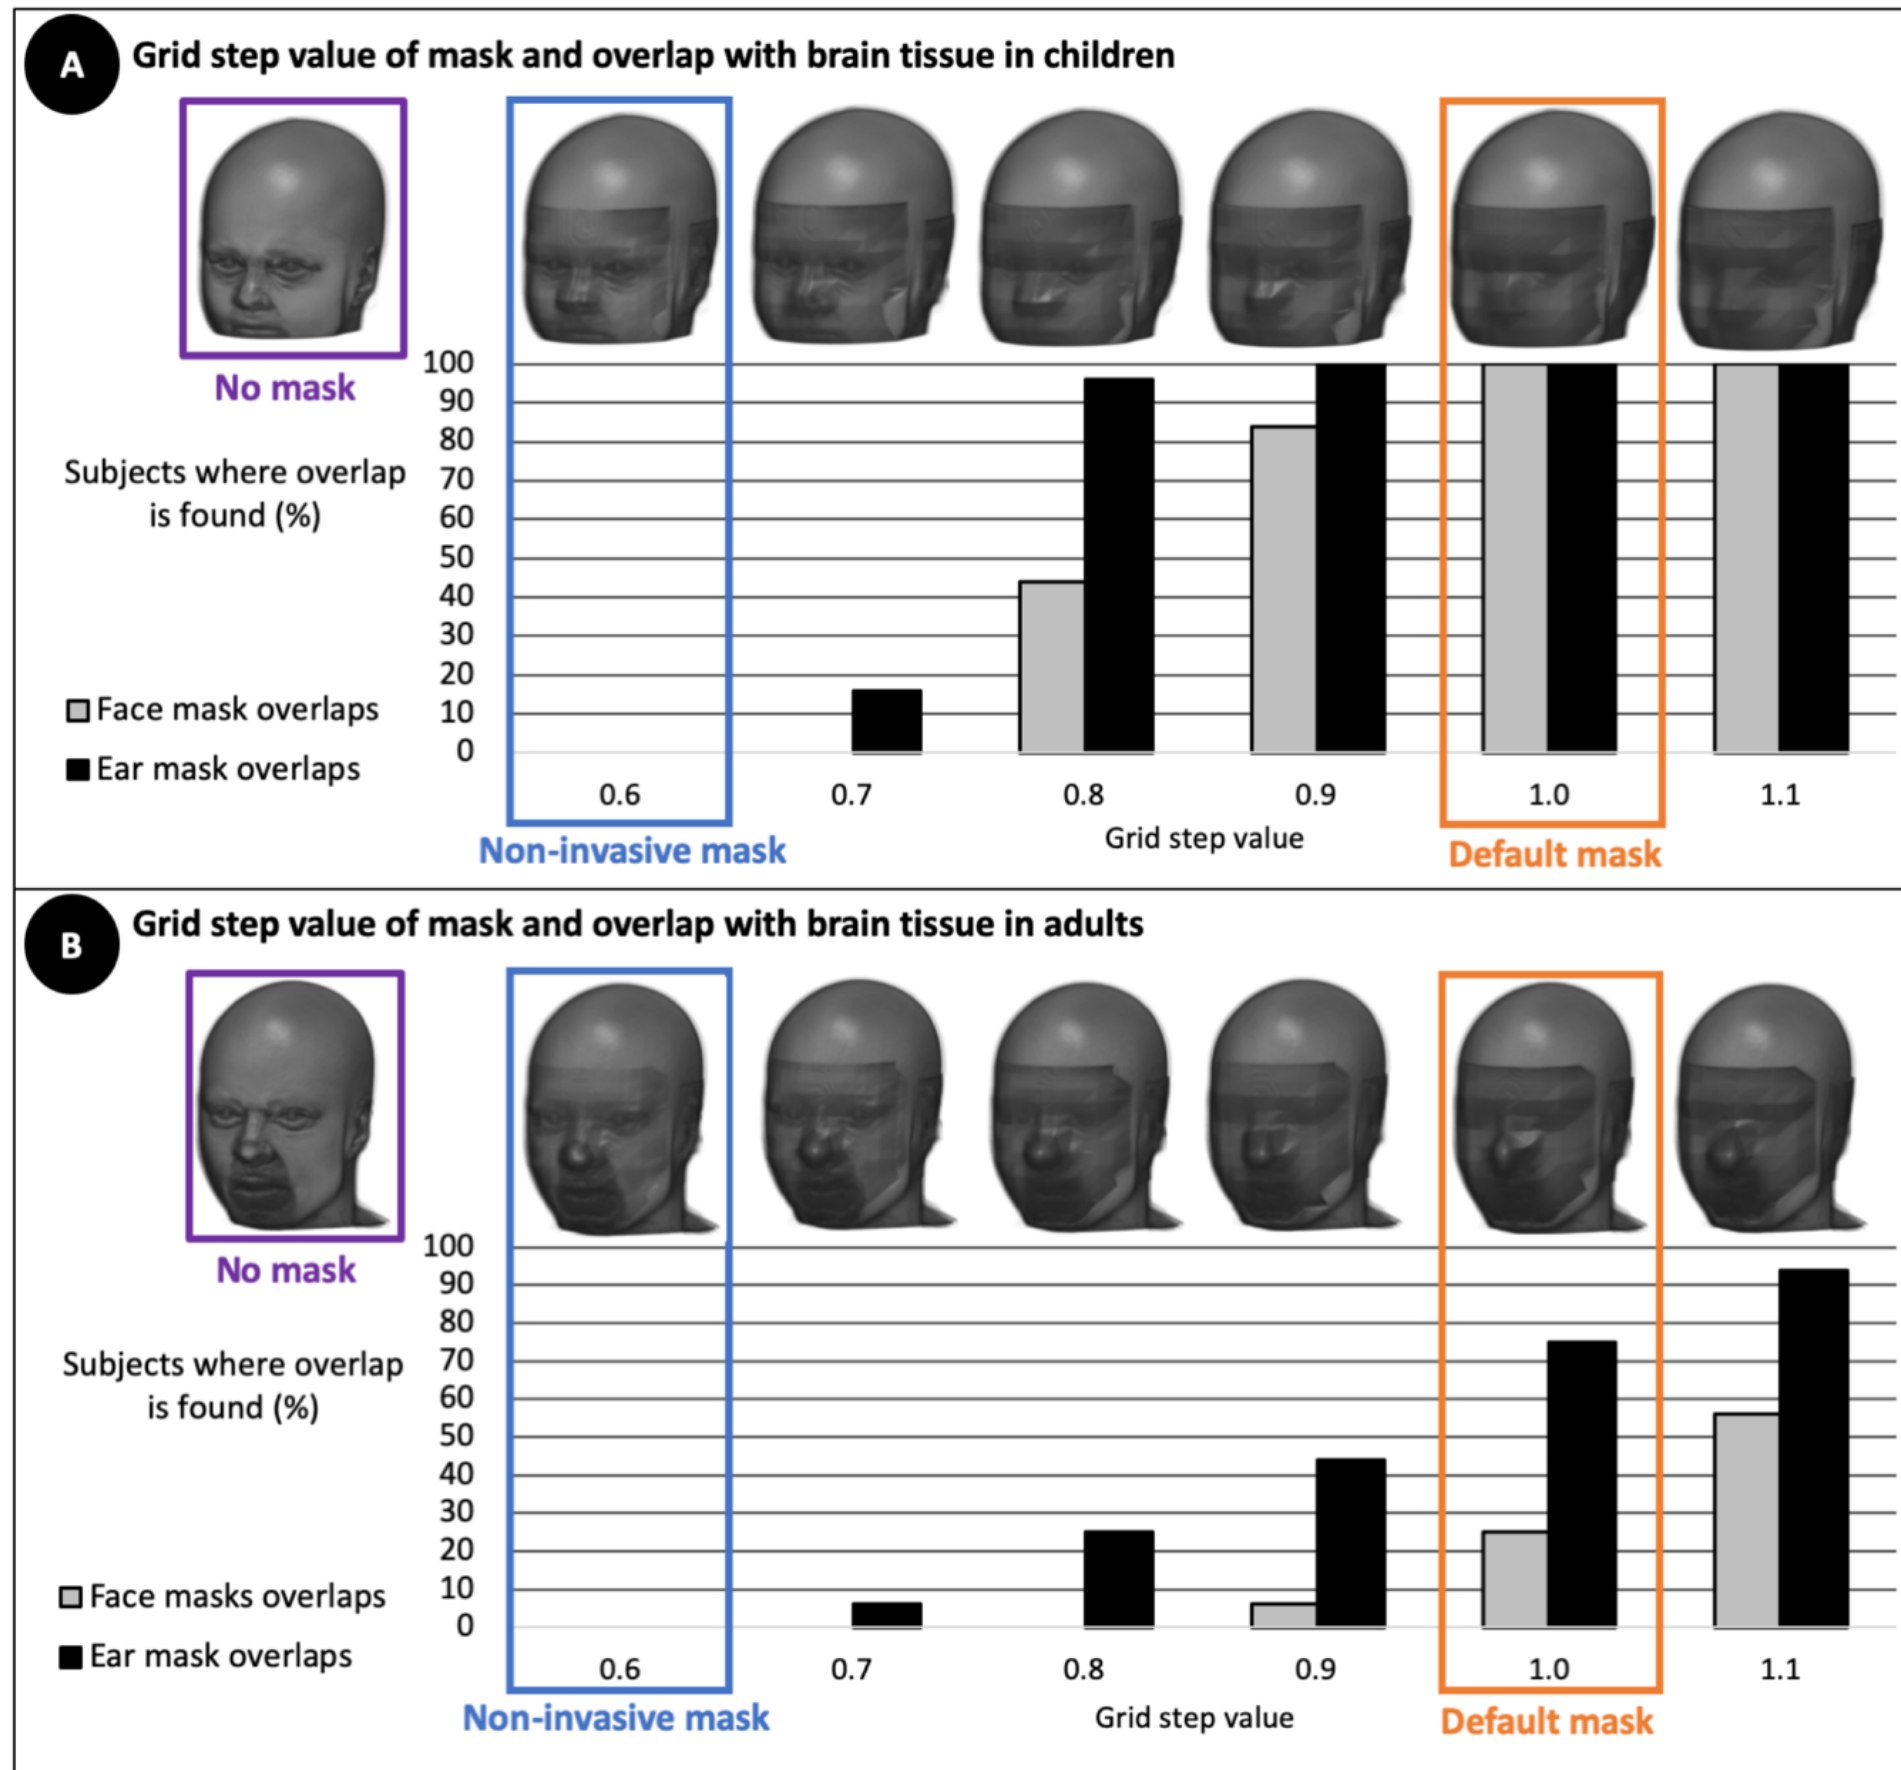

**Figure S3. De-identification properties and invasiveness of masks with varying coarseness.**

Invasiveness is defined as percentage of subjects where the mask overlapped cortical gray matter on multiple axial slices. To find the optimal mask settings we altered the coarseness of the masks by varying the grid step value (x-axis) and calculated the percentage of subjects where the face mask (grey) or ear mask (black) overlapped cortical gray matter (y-axis). Box A shows the child data (N=25). The face renderings shown here are visualizations of the average child created from the 25 children in this study. Box B shows the young adult data (N=16). The face renderings shown here are visualizations of the average young adult created from the 16 young adults in this study. The render of the non-invasive mask that did not overlap in any individual is indicated with blue and the mask with default coarseness with orange. In the purple square the unmasked brain is shown for comparison.



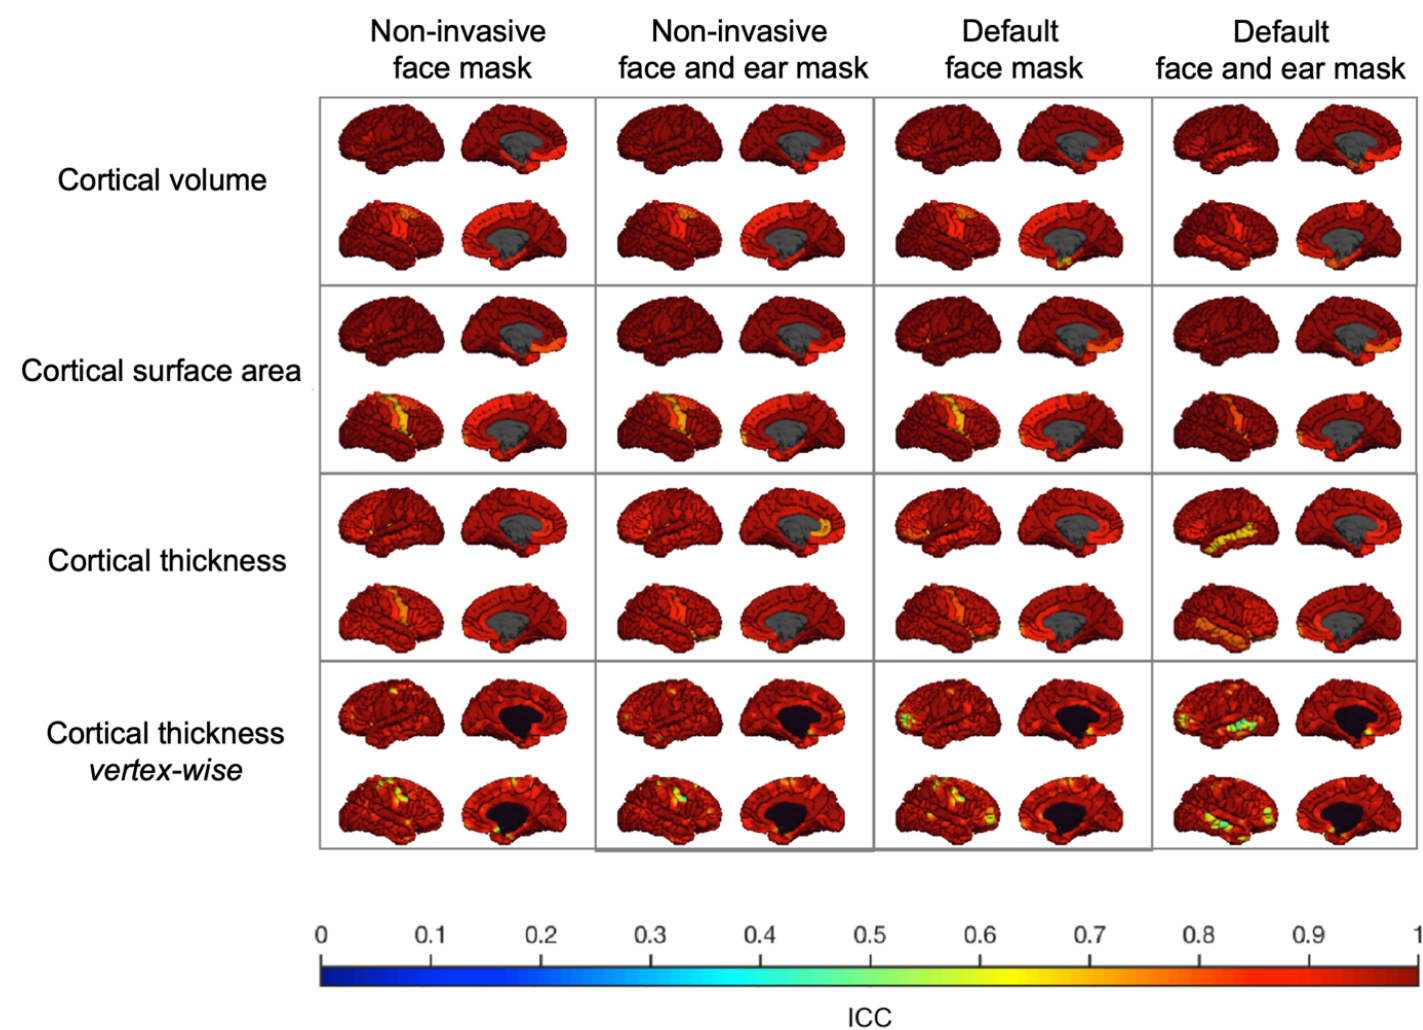

**Figure S4. ICC between brain measures in children derived from original scans versus scans subjected to different mask settings.**  
 The ICC for each brain measure is plotted on the average child scan. Each column shows a different masking setting. Within each square, the left hemisphere (top) and the right hemisphere (bottom) are shown from an outer and medial view.

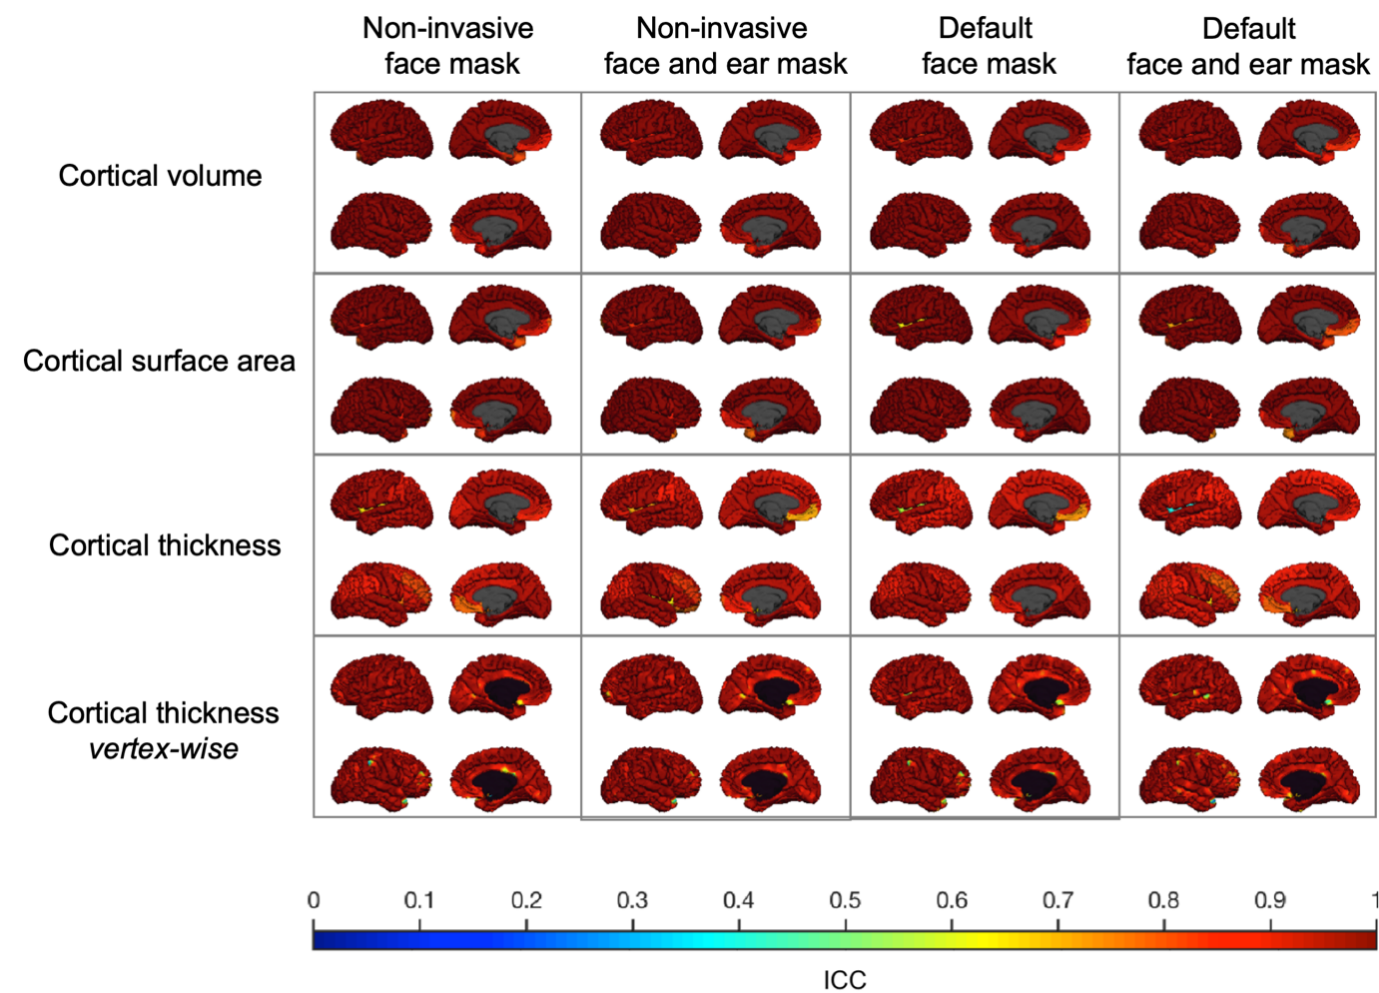

**Figure S5. ICC between brain measures in adults derived from original scans versus scans subjected to different mask settings.**  
 The ICC for each brain measure is plotted on the average adult scan. Each column shows a different masking setting. Within each square, the left hemisphere (top) and the right hemisphere (bottom) are shown from an outer and medial view.

**Table S6. Effects of de-identification on test-retest reliability in young adults: Means, coefficients of variation and t-tests**

| Brain metric                          | Mean (SD)       |                 |                 |                 |                 |                 |                 |                 | Coefficient of Variation |       |        |        |         |         |       |       | Paired t-test t(p) |                 |                 |                   |                 |                 |                 |  |
|---------------------------------------|-----------------|-----------------|-----------------|-----------------|-----------------|-----------------|-----------------|-----------------|--------------------------|-------|--------|--------|---------|---------|-------|-------|--------------------|-----------------|-----------------|-------------------|-----------------|-----------------|-----------------|--|
|                                       | Orig1           | Orig2           | FS df1          | FS df2          | FSL df1         | FSL df2         | FM1             | FM2             | Orig1                    | Orig2 | FS df1 | FS df2 | FSL df1 | FSL df2 | FM1   | FM2   | Orig1 - Orig2      | FS df1 - FS df2 | Orig1 - FS df2  | FSL df1 - FSL df2 | Orig1 - FSL df2 | FM1 - FM2       | Orig1 - FM2     |  |
| <b>Subcortical volume (ml)</b>        |                 |                 |                 |                 |                 |                 |                 |                 |                          |       |        |        |         |         |       |       |                    |                 |                 |                   |                 |                 |                 |  |
| Left thalamus                         | 7.58<br>(0.91)  | 7.60<br>(0.93)  | 7.56<br>(0.95)  | 7.50<br>(0.83)  | 7.59<br>(0.88)  | 7.50<br>(0.91)  | 7.58<br>(0.83)  | 7.57<br>(0.87)  | 12.06                    | 12.18 | 12.55  | 11.09  | 11.61   | 12.12   | 10.95 | 11.46 | -0.38<br>(0.71)    | 0.81<br>(0.43)  | 1.19<br>(0.25)  | 1.50<br>(0.15)    | 1.94<br>(0.07)  | 0.19<br>(0.85)  | 0.15<br>(0.88)  |  |
| Left caudatus                         | 3.85<br>(0.40)  | 3.81<br>(0.41)  | 3.85<br>(0.41)  | 3.81<br>(0.40)  | 3.84<br>(0.39)  | 3.83<br>(0.41)  | 3.82<br>(0.39)  | 3.80<br>(0.38)  | 10.28                    | 10.75 | 10.62  | 10.56  | 10.24   | 10.63   | 10.26 | 10.08 | 1.85<br>(0.08)     | 2.13<br>(0.05)  | 2.02<br>(0.06)  | 0.50<br>(0.63)    | 0.96<br>(0.35)  | 1.46<br>(0.17)  | 2.59<br>(0.02)  |  |
| Left putamen                          | 5.26<br>(0.74)  | 5.25<br>(0.70)  | 5.28<br>(0.70)  | 5.24<br>(0.69)  | 5.27<br>(0.72)  | 5.23<br>(0.67)  | 5.27<br>(0.69)  | 5.22<br>(0.68)  | 14.01                    | 13.37 | 13.32  | 13.26  | 13.65   | 12.72   | 13.07 | 12.98 | 0.15<br>(0.89)     | 0.95<br>(0.36)  | 0.29<br>(0.78)  | 0.75<br>(0.47)    | 0.42<br>(0.68)  | 1.69<br>(0.11)  | 0.77<br>(0.45)  |  |
| Left pallidum                         | 1.92<br>(0.24)  | 1.92<br>(0.21)  | 1.96<br>(0.24)  | 1.92<br>(0.23)  | 1.94<br>(0.23)  | 1.91<br>(0.22)  | 1.93<br>(0.22)  | 1.91<br>(0.24)  | 12.57                    | 11.03 | 12.36  | 11.83  | 11.83   | 11.62   | 11.6  | 12.54 | -0.03<br>(0.98)    | 1.36<br>(0.19)  | -0.01<br>(0.99) | 1.25<br>(0.23)    | 0.26<br>(0.80)  | 0.47<br>(0.64)  | 0.29<br>(0.77)  |  |
| Left hippocampus                      | 4.11<br>(0.34)  | 4.13<br>(0.33)  | 4.12<br>(0.35)  | 4.11<br>(0.31)  | 4.11<br>(0.34)  | 4.11<br>(0.34)  | 4.13<br>(0.36)  | 4.15<br>(0.31)  | 8.32                     | 8.04  | 8.49   | 7.52   | 8.24    | 8.19    | 8.8   | 7.56  | -1.16<br>(0.26)    | 0.24<br>(0.81)  | -0.13<br>(0.90) | -0.09<br>(0.93)   | 0.13<br>(0.90)  | -0.81<br>(0.43) | -1.79<br>(0.09) |  |
| Left amygdala                         | 1.73<br>(0.23)  | 1.74<br>(0.27)  | 1.74<br>(0.24)  | 1.73<br>(0.24)  | 1.74<br>(0.24)  | 1.72<br>(0.24)  | 1.72<br>(0.25)  | 1.72<br>(0.26)  | 13.41                    | 15.39 | 13.48  | 13.79  | 13.93   | 13.96   | 14.55 | 15.17 | -0.50<br>(0.63)    | 0.65<br>(0.53)  | -0.05<br>(0.96) | 0.34<br>(0.74)    | 0.09<br>(0.93)  | 0.06<br>(0.95)  | 0.21<br>(0.84)  |  |
| Left accumbens                        | 0.62<br>(0.14)  | 0.65<br>(0.16)  | 0.64<br>(0.14)  | 0.64<br>(0.15)  | 0.64<br>(0.15)  | 0.63<br>(0.13)  | 0.65<br>(0.16)  | 0.65<br>(0.16)  | 22.05                    | 24.48 | 22.74  | 24.13  | 23.46   | 21.25   | 24.21 | 24.66 | -1.61<br>(0.13)    | -0.52<br>(0.61) | -1.12<br>(0.28) | 0.43<br>(0.67)    | -0.40<br>(0.69) | -0.10<br>(0.92) | -1.57<br>(0.14) |  |
| Right thalamus                        | 7.21<br>(0.85)  | 7.13<br>(0.87)  | 7.19<br>(0.84)  | 7.08<br>(0.81)  | 7.23<br>(0.83)  | 7.10<br>(0.83)  | 7.23<br>(0.85)  | 7.09<br>(0.77)  | 11.81                    | 12.16 | 11.71  | 11.52  | 11.48   | 11.74   | 11.71 | 10.92 | 1.69<br>(0.11)     | 1.89<br>(0.08)  | 2.28<br>(0.04)  | 2.55<br>(0.02)    | 2.04<br>(0.06)  | 2.22<br>(0.04)  | 1.89<br>(0.08)  |  |
| Right caudatus                        | 3.92<br>(0.37)  | 3.89<br>(0.37)  | 3.89<br>(0.37)  | 3.87<br>(0.36)  | 3.91<br>(0.37)  | 3.87<br>(0.34)  | 3.93<br>(0.39)  | 3.87<br>(0.35)  | 9.53                     | 9.53  | 9.4    | 9.3    | 9.46    | 8.83    | 9.9   | 9.1   | 1.47<br>(0.16)     | 0.43<br>(0.67)  | 1.68<br>(0.11)  | 1.66<br>(0.12)    | 2.81<br>(0.01)  | 2.84<br>(0.01)  | 2.31<br>(0.04)  |  |
| Right putamen                         | 5.29<br>(0.66)  | 5.28<br>(0.67)  | 5.27<br>(0.68)  | 5.25<br>(0.65)  | 5.31<br>(0.67)  | 5.26<br>(0.64)  | 5.27<br>(0.66)  | 5.23<br>(0.65)  | 12.48                    | 12.76 | 12.97  | 12.45  | 12.55   | 12.17   | 12.46 | 12.39 | 0.65<br>(0.53)     | 0.81<br>(0.43)  | 1.63<br>(0.12)  | 1.94<br>(0.07)    | 1.31<br>(0.21)  | 1.66<br>(0.12)  | 2.81<br>(0.01)  |  |
| Right pallidum                        | 1.89<br>(0.20)  | 1.88<br>(0.19)  | 1.90<br>(0.22)  | 1.89<br>(0.20)  | 1.89<br>(0.22)  | 1.89<br>(0.24)  | 1.87<br>(0.21)  | 1.89<br>(0.21)  | 10.85                    | 10.16 | 11.53  | 10.83  | 11.91   | 12.74   | 11.27 | 11.37 | 0.43<br>(0.67)     | 0.30<br>(0.77)  | -0.23<br>(0.82) | 0.18<br>(0.86)    | 0.00<br>(1.00)  | -0.67<br>(0.52) | -0.03<br>(0.98) |  |
| Right hippocampus                     | 4.25<br>(0.34)  | 4.30<br>(0.37)  | 4.27<br>(0.35)  | 4.26<br>(0.34)  | 4.27<br>(0.35)  | 4.27<br>(0.35)  | 4.26<br>(0.34)  | 4.28<br>(0.38)  | 7.94                     | 8.54  | 8.25   | 8.04   | 8.12    | 8.26    | 8     | 8.98  | -2.39<br>(0.03)    | 0.23<br>(0.82)  | -0.25<br>(0.80) | 0.17<br>(0.87)    | -0.64<br>(0.53) | -0.55<br>(0.59) | -0.87<br>(0.40) |  |
| Right amygdala                        | 1.90<br>(0.24)  | 1.87<br>(0.24)  | 1.87<br>(0.25)  | 1.89<br>(0.26)  | 1.87<br>(0.25)  | 1.91<br>(0.26)  | 1.85<br>(0.24)  | 1.88<br>(0.26)  | 12.73                    | 13.04 | 13.33  | 13.57  | 13.2    | 13.74   | 12.96 | 13.66 | 0.90<br>(0.38)     | -0.71<br>(0.49) | 0.36<br>(0.72)  | -1.11<br>(0.28)   | -0.23<br>(0.82) | -0.86<br>(0.40) | 0.53<br>(0.60)  |  |
| Right accumbens                       | 0.63<br>(0.12)  | 0.64<br>(0.12)  | 0.63<br>(0.13)  | 0.65<br>(0.13)  | 0.63<br>(0.12)  | 0.64<br>(0.12)  | 0.63<br>(0.13)  | 0.64<br>(0.13)  | 19.31                    | 18.71 | 20.35  | 19.84  | 19.27   | 18.92   | 20.51 | 20.22 | -0.40<br>(0.70)    | -0.83<br>(0.42) | -0.89<br>(0.39) | -0.57<br>(0.58)   | -0.56<br>(0.58) | -0.67<br>(0.51) | -0.52<br>(0.61) |  |
| <b>Ventricular volume (ml)</b>        |                 |                 |                 |                 |                 |                 |                 |                 |                          |       |        |        |         |         |       |       |                    |                 |                 |                   |                 |                 |                 |  |
| Third ventricle                       | 0.86<br>(0.38)  | 0.88<br>(0.39)  | 0.86<br>(0.39)  | 0.87<br>(0.39)  | 0.85<br>(0.39)  | 0.87<br>(0.40)  | 0.86<br>(0.39)  | 0.88<br>(0.39)  | 44.70                    | 44.44 | 45.12  | 44.55  | 45.64   | 45.71   | 45.09 | 44.57 | -1.49<br>(0.16)    | -1.50<br>(0.16) | -1.25<br>(0.23) | -1.43<br>(0.17)   | -0.77<br>(0.45) | -1.56<br>(0.14) | -1.50<br>(0.15) |  |
| Left lateral ventricle                | 8.45<br>(5.15)  | 8.51<br>(5.15)  | 8.45<br>(5.15)  | 8.48<br>(5.17)  | 8.46<br>(5.14)  | 8.51<br>(5.16)  | 8.44<br>(5.14)  | 8.48<br>(5.16)  | 60.95                    | 60.60 | 61     | 60.97  | 60.72   | 60.6    | 60.9  | 60.78 | -1.49<br>(0.16)    | -0.78<br>(0.45) | -0.73<br>(0.47) | -1.16<br>(0.27)   | -1.58<br>(0.13) | -0.92<br>(0.37) | -0.91<br>(0.38) |  |
| Left inferior lateral ventricle       | 0.41<br>(0.23)  | 0.43<br>(0.21)  | 0.41<br>(0.21)  | 0.43<br>(0.20)  | 0.43<br>(0.21)  | 0.43<br>(0.21)  | 0.41<br>(0.23)  | 0.43<br>(0.22)  | 55.57                    | 50.38 | 50.2   | 46.64  | 49.35   | 50.38   | 55.77 | 52.24 | -1.27<br>(0.22)    | -1.48<br>(0.16) | -1.37<br>(0.19) | 0.20<br>(0.85)    | -0.86<br>(0.40) | -0.99<br>(0.34) | -1.02<br>(0.33) |  |
| Right lateral ventricle               | 7.02<br>(3.69)  | 7.08<br>(3.69)  | 6.99<br>(3.68)  | 7.07<br>(3.65)  | 6.99<br>(3.70)  | 7.05<br>(3.68)  | 7.02<br>(3.68)  | 7.08<br>(3.69)  | 52.60                    | 52.10 | 52.72  | 51.64  | 52.94   | 52.17   | 52.39 | 52.2  | -1.74<br>(0.10)    | -1.92<br>(0.07) | -1.32<br>(0.21) | -1.54<br>(0.15)   | -0.88<br>(0.39) | -1.56<br>(0.14) | -1.65<br>(0.12) |  |
| Right inferior lateral ventricle      | 0.38<br>(0.18)  | 0.39<br>(0.18)  | 0.38<br>(0.19)  | 0.39<br>(0.18)  | 0.38<br>(0.18)  | 0.38<br>(0.18)  | 0.37<br>(0.19)  | 0.38<br>(0.19)  | 47.35                    | 45.80 | 49.6   | 46.95  | 46.72   | 47.82   | 51.17 | 49.58 | -0.86<br>(0.40)    | -1.05<br>(0.31) | -1.17<br>(0.26) | 0.02<br>(0.99)    | 0.23<br>(0.82)  | -0.94<br>(0.36) | -0.39<br>(0.70) |  |
| <b>Local cortical volume (ml)</b>     |                 |                 |                 |                 |                 |                 |                 |                 |                          |       |        |        |         |         |       |       |                    |                 |                 |                   |                 |                 |                 |  |
| Left banks superior temporal sulcus   | 2.74<br>(0.53)  | 2.73<br>(0.56)  | 2.71<br>(0.50)  | 2.74<br>(0.53)  | 2.73<br>(0.54)  | 2.68<br>(0.55)  | 2.68<br>(0.49)  | 2.71<br>(0.52)  | 19.45                    | 20.64 | 18.3   | 19.46  | 19.86   | 20.32   | 18.13 | 19.21 | 0.21<br>(0.84)     | -0.97<br>(0.35) | -0.06<br>(0.95) | 1.40<br>(0.18)    | 1.38<br>(0.19)  | -1.04<br>(0.31) | 0.77<br>(0.46)  |  |
| Left caudal anterior cingulate cortex | 1.96<br>(0.57)  | 1.88<br>(0.51)  | 1.94<br>(0.57)  | 1.91<br>(0.58)  | 1.95<br>(0.56)  | 1.92<br>(0.57)  | 1.95<br>(0.57)  | 1.94<br>(0.54)  | 28.91                    | 27.32 | 29.45  | 30.65  | 28.44   | 29.88   | 28.95 | 27.88 | 2.58<br>(0.02)     | 1.08<br>(0.30)  | 1.85<br>(0.08)  | 1.13<br>(0.28)    | 1.27<br>(0.22)  | 0.71<br>(0.49)  | 0.81<br>(0.43)  |  |
| Left caudal middle frontal gyrus      | 6.53<br>(0.89)  | 6.52<br>(0.97)  | 6.50<br>(0.87)  | 6.44<br>(0.94)  | 6.54<br>(0.90)  | 6.47<br>(0.98)  | 6.55<br>(0.89)  | 6.51<br>(0.94)  | 13.57                    | 14.89 | 13.32  | 14.65  | 13.82   | 15.13   | 13.66 | 14.43 | 0.17<br>(0.87)     | 1.02<br>(0.32)  | 1.36<br>(0.19)  | 1.19<br>(0.25)    | 0.91<br>(0.38)  | 0.96<br>(0.35)  | 0.31<br>(0.76)  |  |
| Left cuneus                           | 3.39<br>(0.63)  | 3.37<br>(0.58)  | 3.36<br>(0.60)  | 3.37<br>(0.59)  | 3.38<br>(0.62)  | 3.39<br>(0.63)  | 3.39<br>(0.64)  | 3.38<br>(0.61)  | 18.67                    | 17.13 | 17.82  | 17.68  | 18.27   | 18.51   | 18.84 | 18.1  | 0.47<br>(0.65)     | -0.23<br>(0.82) | 0.59<br>(0.56)  | -0.17<br>(0.87)   | -0.14<br>(0.89) | 0.26<br>(0.80)  | 0.01<br>(0.99)  |  |
| Left entorhinal cortex                | 2.03<br>(0.34)  | 2.04<br>(0.28)  | 2.00<br>(0.32)  | 2.02<br>(0.36)  | 2.04<br>(0.31)  | 2.01<br>(0.32)  | 2.04<br>(0.38)  | 2.01<br>(0.39)  | 16.96                    | 13.64 | 16.11  | 18.01  | 14.99   | 15.67   | 18.8  | 19.48 | -0.26<br>(0.80)    | -0.49<br>(0.63) | 0.19<br>(0.86)  | 0.43<br>(0.67)    | 0.30<br>(0.77)  | 0.61<br>(0.55)  | 0.30<br>(0.77)  |  |
| Left fusiform gyrus                   | 10.75<br>(1.15) | 10.84<br>(1.10) | 10.69<br>(1.14) | 10.83<br>(1.08) | 10.66<br>(1.23) | 10.81<br>(1.13) | 10.70<br>(1.21) | 10.90<br>(1.22) | 10.74                    | 10.13 | 10.69  | 9.98   | 11.5    | 10.49   | 11.27 | 11.2  | -1.29<br>(0.21)    | -1.72<br>(0.11) | -0.88<br>(0.39) | -1.54<br>(0.14)   | -0.65<br>(0.52) | -2.02<br>(0.06) | -1.81<br>(0.09) |  |
| Left inferior parietal cortex         | 13.36<br>(2.06) | 13.35<br>(2.09) | 13.31<br>(2.09) | 13.33<br>(2.09) | 13.39<br>(2.18) | 13.41<br>(2.23) | 13.43<br>(2.07) | 13.39<br>(2.11) | 15.41                    | 15.63 | 15.73  | 15.65  | 16.3    | 16.64   | 15.43 | 15.79 | 0.10<br>(0.92)     | -0.24<br>(0.81) | 0.52<br>(0.61)  | -0.20<br>(0.85)   | -0.49<br>(0.63) | 0.40<br>(0.70)  | -0.48<br>(0.64) |  |
| Left inferior temporal gyrus          | 11.50<br>(1.31) | 11.46<br>(1.43) | 11.46<br>(1.42) | 11.51<br>(1.39) | 11.53<br>(1.46) | 11.53<br>(1.53) | 11.45<br>(1.41) | 11.53<br>(1.49) | 11.42                    | 12.45 | 12.36  | 12.1   | 12.66   | 13.28   | 12.34 | 12.9  | 0.38<br>(0.71)     | -0.45<br>(0.66) | -0.10<br>(0.92) | 0.04<br>(0.97)    | -0.28<br>(0.78) | -0.81<br>(0.43) | -0.31<br>(0.76) |  |
| Left isthmus cingulate cortex         | 2.91<br>(0.43)  | 2.94<br>(0.43)  | 2.93<br>(0.45)  | 2.92<br>(0.42)  | 2.94<br>(0.48)  | 2.94<br>(0.42)  | 2.94<br>(0.43)  | 2.93<br>(0.41)  | 14.86                    | 14.64 | 15.51  | 14.26  | 16.28   | 14.27   | 14.67 | 14.03 | -0.89<br>(0.39)    | 0.67<br>(0.51)  | -0.42<br>(0.68) | 0.30<br>(0.77)    | -0.82<br>(0.43) | 0.18<br>(0.86)  | -0.60<br>(0.56) |  |
| Left lateral occipital cortex         | 12.84<br>(2.13) | 12.80<br>(2.10) | 12.85<br>(2.06) | 12.76<br>(2.03) | 12.85<br>(2.17) | 12.73<br>(2.03) | 12.81<br>(2.08) | 12.86<br>(2.02) | 16.56                    | 16.40 | 16     | 15.91  | 16.85   | 15.93   | 16.26 | 15.74 | 0.75<br>(0.47)     | 1.14<br>(0.27)  | 1.53<br>(0.15)  | 1.41<br>(0.18)    | 1.77<br>(0.10)  | -0.87<br>(0.40) | -0.26<br>(0.80) |  |
| Left lateral orbitofrontal cortex     | 8.01<br>(0.82)  | 7.96<br>(0.83)  | 8.04<br>(0.76)  | 8.02<br>(0.83)  | 8.02<br>(0.85)  | 8.00<br>(0.86)  | 8.04<br>(0.81)  | 8.04<br>(0.85)  | 10.23                    | 10.45 | 9.45   | 10.34  | 10.6    | 10.77   | 10.04 | 10.53 | 0.66<br>(0.52)     | 0.28<br>(0.78)  | -0.21<br>(0.83) | 0.29<br>(0.78)    | 0.15<br>(0.88)  | -0.08<br>(0.94) | -0.43<br>(0.67) |  |
| Left lingual gyrus                    | 6.98<br>(1.22)  | 6.93<br>(1.23)  | 6.99<br>(1.22)  | 6.93<br>(1.16)  | 7.00<br>(1.24)  | 6.95<br>(1.22)  | 6.98<br>(1.24)  | 6.92<br>(1.21)  | 17.50                    | 17.80 | 17.51  | 16.75  | 17.67   | 17.54   | 17.79 | 17.45 | 1.04<br>(0.31)     | 1.06<br>(0.31)  | 0.90<br>(0.38)  | 1.28<br>(0.22)    | 0.67<br>(0.51)  | 1.21<br>(0.24)  | 1.12<br>(0.28)  |  |
| Left medial orbitofrontal cortex      | 5.22<br>(0.86)  | 5.17<br>(0.78)  | 5.06<br>(0.62)  | 5.16<br>(0.69)  | 5.11<br>(0.79)  | 5.13<br>(0.67)  | 5.21<br>(0.78)  | 5.25<br>(0.83)  | 16.49                    | 15.07 | 12.22  | 13.35  | 15.5    | 13.17   | 14.97 | 15.8  | 0.56<br>(0.59)     | -0.98<br>(0.34) | 0.58<br>(0.57)  | -0.15<br>(0.88)   | 0.75<br>(0.46)  | -0.49<br>(0.63) | -0.20<br>(0.85) |  |
| Left middle temporal gyrus            | 11.22<br>(1.29) | 11.29<br>(1.31) | 11.25<br>(1.22) | 11.25<br>(1.30) | 11.24<br>(1.29) | 11.29<br>(1.34) | 11.20<br>(1.27) | 11.24<br>(1.27) | 11.52                    | 11.63 | 10.81  | 11.55  | 11.46   | 11.83   | 11.32 | 11.29 | -0.76<br>(0.46)    | 0.06<br>(0.95)  | -0.39<br>(0.70) | -0.64<br>(0.53)   | -0.89<br>(0.39) | -0.32<br>(0.75) | -0.14<br>(0.89) |  |
| Left parahippocampal gyrus            |                 |                 |                 |                 |                 |                 |                 |                 |                          |       |        |        |         |         |       |       |                    |                 |                 |                   |                 |                 |                 |  |

|                                        |                 |                 |                 |                 |                 |                 |                 |                 |       |       |       |       |       |       |       |       |                 |                 |                 |                 |                 |                 |                 |
|----------------------------------------|-----------------|-----------------|-----------------|-----------------|-----------------|-----------------|-----------------|-----------------|-------|-------|-------|-------|-------|-------|-------|-------|-----------------|-----------------|-----------------|-----------------|-----------------|-----------------|-----------------|
| Left paracentral lobule                | 3.85<br>(0.60)  | 3.83<br>(0.61)  | 3.86<br>(0.57)  | 3.85<br>(0.65)  | 3.88<br>(0.59)  | 3.87<br>(0.65)  | 3.86<br>(0.55)  | 3.88<br>(0.69)  | 15.51 | 15.92 | 14.76 | 17    | 15.33 | 16.87 | 14.36 | 17.71 | 0.85<br>(0.41)  | 0.50<br>(0.62)  | 0.30<br>(0.77)  | 0.26<br>(0.80)  | -0.59<br>(0.57) | -0.51<br>(0.61) | -0.69<br>(0.50) |
| Left pars opercularis                  | 4.93<br>(0.73)  | 4.83<br>(0.78)  | 4.84<br>(0.71)  | 4.87<br>(0.72)  | 4.86<br>(0.78)  | 4.86<br>(0.76)  | 4.85<br>(0.70)  | 4.85<br>(0.71)  | 14.78 | 16.04 | 14.75 | 14.81 | 16.13 | 15.56 | 14.53 | 14.55 | 2.32<br>(0.03)  | -0.65<br>(0.53) | 1.54<br>(0.14)  | 0.02<br>(0.99)  | 1.94<br>(0.07)  | -0.05<br>(0.96) | 2.08<br>(0.05)  |
| Left pars orbitalis                    | 2.53<br>(0.34)  | 2.52<br>(0.31)  | 2.54<br>(0.32)  | 2.52<br>(0.32)  | 2.54<br>(0.34)  | 2.48<br>(0.34)  | 2.53<br>(0.35)  | 2.55<br>(0.35)  | 13.49 | 12.42 | 12.58 | 12.57 | 13.38 | 13.85 | 13.81 | 13.9  | 0.52<br>(0.61)  | 0.64<br>(0.53)  | 0.34<br>(0.74)  | 1.96<br>(0.07)  | 1.94<br>(0.07)  | -0.56<br>(0.58) | -0.63<br>(0.54) |
| Left pars triangularis                 | 3.89<br>(0.73)  | 3.88<br>(0.72)  | 3.91<br>(0.73)  | 3.89<br>(0.75)  | 3.89<br>(0.74)  | 3.90<br>(0.74)  | 3.93<br>(0.74)  | 3.90<br>(0.75)  | 18.87 | 18.52 | 18.65 | 19.14 | 19.04 | 18.95 | 18.9  | 19.16 | 0.22<br>(0.83)  | 0.40<br>(0.69)  | -0.06<br>(0.95) | -0.32<br>(0.75) | -0.16<br>(0.88) | 0.74<br>(0.47)  | -0.32<br>(0.75) |
| Left pericalcarine cortex              | 2.19<br>(0.47)  | 2.14<br>(0.42)  | 2.19<br>(0.48)  | 2.16<br>(0.43)  | 2.20<br>(0.46)  | 2.15<br>(0.41)  | 2.17<br>(0.47)  | 2.11<br>(0.41)  | 21.62 | 19.58 | 22    | 19.67 | 20.89 | 19.27 | 21.76 | 19.53 | 1.95<br>(0.07)  | 0.70<br>(0.50)  | 0.86<br>(0.40)  | 2.14<br>(0.05)  | 1.67<br>(0.11)  | 2.20<br>(0.04)  | 2.51<br>(0.02)  |
| Left postcentral gyrus                 | 10.23<br>(1.45) | 10.22<br>(1.58) | 10.21<br>(1.44) | 10.18<br>(1.53) | 10.23<br>(1.46) | 10.19<br>(1.49) | 10.20<br>(1.43) | 10.22<br>(1.61) | 14.21 | 15.48 | 14.09 | 15.02 | 14.22 | 14.6  | 14.02 | 15.79 | 0.21<br>(0.84)  | 0.50<br>(0.63)  | 1.02<br>(0.32)  | 0.79<br>(0.44)  | 0.63<br>(0.54)  | -0.22<br>(0.83) | 0.26<br>(0.80)  |
| Left posterior cingulate cortex        | 3.49<br>(0.60)  | 3.48<br>(0.61)  | 3.51<br>(0.57)  | 3.49<br>(0.60)  | 3.51<br>(0.60)  | 3.48<br>(0.61)  | 3.50<br>(0.61)  | 3.48<br>(0.61)  | 17.04 | 17.39 | 16.12 | 17.07 | 17.08 | 17.55 | 17.51 | 17.41 | 0.45<br>(0.66)  | 1.08<br>(0.30)  | 0.35<br>(0.73)  | 1.34<br>(0.20)  | 0.75<br>(0.46)  | 0.87<br>(0.40)  | 0.68<br>(0.51)  |
| Left precentral gyrus                  | 13.69<br>(1.36) | 13.75<br>(1.32) | 13.69<br>(1.30) | 13.66<br>(1.39) | 13.72<br>(1.32) | 13.70<br>(1.42) | 13.73<br>(1.39) | 13.73<br>(1.40) | 9.96  | 9.61  | 9.46  | 10.2  | 9.63  | 10.35 | 10.11 | 10.21 | -1.00<br>(0.33) | 0.68<br>(0.51)  | 0.52<br>(0.61)  | 0.30<br>(0.77)  | -0.13<br>(0.90) | -0.01<br>(0.99) | -0.52<br>(0.61) |
| Left precuneus                         | 10.50<br>(1.19) | 10.37<br>(1.25) | 10.41<br>(1.25) | 10.39<br>(1.25) | 10.49<br>(1.30) | 10.35<br>(1.30) | 10.48<br>(1.22) | 10.45<br>(1.30) | 11.31 | 12.09 | 11.96 | 12.01 | 12.38 | 12.61 | 11.61 | 12.44 | 2.24<br>(0.04)  | 0.57<br>(0.57)  | 1.79<br>(0.09)  | 3.27<br>(0.01)  | 2.46<br>(0.03)  | 0.69<br>(0.50)  | 0.82<br>(0.42)  |
| Left rostral anterior cingulate cortex | 3.06<br>(0.50)  | 3.03<br>(0.53)  | 3.05<br>(0.52)  | 3.06<br>(0.50)  | 3.09<br>(0.51)  | 3.07<br>(0.50)  | 3.09<br>(0.51)  | 3.05<br>(0.50)  | 16.48 | 17.46 | 16.9  | 16.19 | 16.39 | 16.43 | 16.65 | 16.44 | 1.00<br>(0.33)  | -0.19<br>(0.85) | -0.07<br>(0.95) | 0.55<br>(0.59)  | -0.32<br>(0.75) | 0.99<br>(0.34)  | 0.27<br>(0.79)  |
| Left rostral middle frontal gyrus      | 15.34<br>(2.11) | 15.20<br>(2.09) | 15.34<br>(2.04) | 15.23<br>(2.06) | 15.32<br>(2.10) | 15.13<br>(2.15) | 15.38<br>(2.00) | 15.25<br>(1.96) | 13.77 | 13.77 | 13.28 | 13.51 | 13.73 | 14.24 | 12.99 | 12.84 | 1.30<br>(0.21)  | 0.88<br>(0.39)  | 0.92<br>(0.37)  | 1.60<br>(0.13)  | 1.95<br>(0.07)  | 1.19<br>(0.25)  | 0.87<br>(0.40)  |
| Left superior frontal gyrus            | 23.51<br>(2.34) | 23.32<br>(2.31) | 23.55<br>(2.33) | 23.28<br>(2.22) | 23.37<br>(2.44) | 23.10<br>(2.30) | 23.57<br>(2.40) | 23.38<br>(2.26) | 9.94  | 9.92  | 9.89  | 9.55  | 10.44 | 9.96  | 10.2  | 9.65  | 1.03<br>(0.32)  | 1.82<br>(0.09)  | 1.40<br>(0.18)  | 1.49<br>(0.16)  | 2.39<br>(0.03)  | 1.08<br>(0.30)  | 0.65<br>(0.53)  |
| Left superior parietal cortex          | 14.57<br>(1.57) | 14.52<br>(1.68) | 14.56<br>(1.59) | 14.51<br>(1.68) | 14.58<br>(1.65) | 14.48<br>(1.78) | 14.58<br>(1.70) | 14.48<br>(1.65) | 10.74 | 11.59 | 10.94 | 11.59 | 11.34 | 12.3  | 11.63 | 11.38 | 0.67<br>(0.51)  | 0.67<br>(0.51)  | 0.88<br>(0.39)  | 1.19<br>(0.25)  | 0.96<br>(0.35)  | 1.36<br>(0.19)  | 1.28<br>(0.22)  |
| Left superior temporal gyrus           | 12.23<br>(1.27) | 12.27<br>(1.33) | 12.28<br>(1.28) | 12.25<br>(1.32) | 12.27<br>(1.33) | 12.22<br>(1.31) | 12.31<br>(1.26) | 12.30<br>(1.28) | 10.35 | 10.83 | 10.39 | 10.79 | 10.84 | 10.73 | 10.24 | 10.38 | -0.46<br>(0.65) | 0.39<br>(0.71)  | -0.19<br>(0.86) | 0.69<br>(0.50)  | 0.11<br>(0.91)  | 0.08<br>(0.94)  | -0.62<br>(0.54) |
| Left supramarginal gyrus               | 11.97<br>(1.60) | 11.94<br>(1.66) | 11.97<br>(1.58) | 11.96<br>(1.67) | 11.97<br>(1.66) | 11.99<br>(1.73) | 11.98<br>(1.69) | 12.05<br>(1.67) | 13.39 | 13.90 | 13.24 | 13.97 | 13.87 | 14.43 | 14.1  | 13.87 | 0.34<br>(0.74)  | 0.15<br>(0.88)  | 0.07<br>(0.94)  | -0.33<br>(0.74) | -0.31<br>(0.76) | -1.03<br>(0.32) | -0.96<br>(0.35) |
| Left frontal pole                      | 1.04<br>(0.14)  | 1.03<br>(0.12)  | 1.03<br>(0.14)  | 1.03<br>(0.12)  | 1.00<br>(0.11)  | 1.02<br>(0.11)  | 1.04<br>(0.15)  | 1.02<br>(0.12)  | 13.60 | 11.50 | 13.72 | 12.12 | 11.33 | 11.25 | 13.96 | 11.52 | 0.35<br>(0.73)  | 0.17<br>(0.86)  | 0.40<br>(0.69)  | -0.87<br>(0.40) | 0.72<br>(0.48)  | 1.21<br>(0.25)  | 0.60<br>(0.56)  |
| Left temporal pole                     | 2.63<br>(0.23)  | 2.70<br>(0.23)  | 2.66<br>(0.22)  | 2.73<br>(0.25)  | 2.65<br>(0.25)  | 2.72<br>(0.28)  | 2.65<br>(0.24)  | 2.73<br>(0.31)  | 8.66  | 8.36  | 8.29  | 9.17  | 9.61  | 10.29 | 9.25  | 11.42 | -1.39<br>(0.19) | -1.79<br>(0.09) | -2.55<br>(0.02) | -2.05<br>(0.06) | -1.95<br>(0.07) | -1.37<br>(0.19) | -1.77<br>(0.10) |
| Left transverse temporal gyrus         | 1.33<br>(0.19)  | 1.34<br>(0.24)  | 1.33<br>(0.20)  | 1.33<br>(0.20)  | 1.33<br>(0.22)  | 1.33<br>(0.21)  | 1.33<br>(0.20)  | 1.33<br>(0.21)  | 14.70 | 17.66 | 15.39 | 14.84 | 16.64 | 15.78 | 14.76 | 15.5  | -0.72<br>(0.48) | 0.15<br>(0.88)  | 0.00<br>(1.00)  | 0.42<br>(0.68)  | -0.19<br>(0.85) | -0.34<br>(0.74) | -0.67<br>(0.51) |
| Left insula                            | 7.80<br>(0.81)  | 7.84<br>(0.68)  | 7.89<br>(1.08)  | 7.78<br>(0.74)  | 7.99<br>(0.94)  | 7.93<br>(0.84)  | 7.87<br>(0.90)  | 7.88<br>(0.71)  | 10.40 | 8.73  | 13.73 | 9.47  | 11.8  | 10.57 | 11.4  | 9.05  | -0.30<br>(0.77) | 0.83<br>(0.42)  | 0.18<br>(0.86)  | 0.43<br>(0.67)  | -0.89<br>(0.39) | -0.12<br>(0.90) | -0.58<br>(0.57) |
| Right banks superior temporal sulcus   | 2.31<br>(0.32)  | 2.33<br>(0.37)  | 2.31<br>(0.34)  | 2.35<br>(0.36)  | 2.36<br>(0.35)  | 2.29<br>(0.39)  | 2.32<br>(0.40)  | 2.33<br>(0.38)  | 13.91 | 16.00 | 14.73 | 15.18 | 15.01 | 17.08 | 17.05 | 16.47 | -0.67<br>(0.52) | -1.66<br>(0.12) | -1.70<br>(0.11) | 2.22<br>(0.04)  | 0.66<br>(0.52)  | -0.27<br>(0.79) | -0.59<br>(0.56) |
| Right caudal anterior cingulate cortex | 2.45<br>(0.63)  | 2.34<br>(0.55)  | 2.45<br>(0.62)  | 2.33<br>(0.54)  | 2.42<br>(0.58)  | 2.35<br>(0.54)  | 2.45<br>(0.63)  | 2.34<br>(0.57)  | 25.86 | 23.54 | 25.43 | 23.15 | 23.93 | 22.85 | 25.54 | 24.21 | 1.87<br>(0.08)  | 1.63<br>(0.12)  | 1.39<br>(0.19)  | 2.47<br>(0.03)  | 1.48<br>(0.16)  | 1.51<br>(0.15)  | 1.58<br>(0.13)  |
| Right caudal middle frontal gyrus      | 6.49<br>(0.84)  | 6.41<br>(0.86)  | 6.50<br>(0.88)  | 6.40<br>(0.83)  | 6.49<br>(0.83)  | 6.44<br>(0.85)  | 6.45<br>(0.82)  | 6.43<br>(0.81)  | 12.89 | 13.42 | 13.51 | 13.03 | 12.75 | 13.25 | 12.65 | 12.68 | 1.22<br>(0.24)  | 1.79<br>(0.09)  | 1.32<br>(0.21)  | 0.82<br>(0.42)  | 0.81<br>(0.43)  | 0.42<br>(0.68)  | 0.95<br>(0.36)  |
| Right cuneus                           | 3.77<br>(0.74)  | 3.74<br>(0.72)  | 3.77<br>(0.76)  | 3.73<br>(0.72)  | 3.75<br>(0.69)  | 3.72<br>(0.71)  | 3.74<br>(0.72)  | 3.74<br>(0.72)  | 19.54 | 19.15 | 20.1  | 19.39 | 18.39 | 18.99 | 19.12 | 19.16 | 1.09<br>(0.29)  | 1.18<br>(0.26)  | 1.26<br>(0.23)  | 1.31<br>(0.21)  | 1.40<br>(0.18)  | 0.02<br>(0.98)  | 1.12<br>(0.28)  |
| Right entorhinal cortex                | 2.01<br>(0.33)  | 1.96<br>(0.43)  | 1.95<br>(0.46)  | 1.93<br>(0.47)  | 2.00<br>(0.38)  | 1.98<br>(0.41)  | 2.01<br>(0.41)  | 2.02<br>(0.50)  | 16.22 | 22.08 | 23.65 | 24.32 | 18.8  | 20.54 | 20.36 | 24.58 | 0.58<br>(0.57)  | 0.17<br>(0.87)  | 0.83<br>(0.42)  | 0.22<br>(0.83)  | 0.32<br>(0.75)  | -0.08<br>(0.93) | -0.12<br>(0.90) |
| Right fusiform gyrus                   | 9.91<br>(1.62)  | 9.97<br>(1.51)  | 9.86<br>(1.52)  | 10.00<br>(1.49) | 9.94<br>(1.45)  | 9.99<br>(1.58)  | 9.94<br>(1.52)  | 9.95<br>(1.52)  | 16.39 | 15.19 | 15.46 | 14.86 | 14.56 | 15.82 | 15.34 | 15.24 | -0.60<br>(0.56) | -1.15<br>(0.27) | -0.79<br>(0.44) | -0.63<br>(0.54) | -0.89<br>(0.39) | -0.11<br>(0.92) | -0.37<br>(0.72) |
| Right inferior parietal cortex         | 15.28<br>(2.33) | 15.18<br>(2.54) | 15.24<br>(2.36) | 15.16<br>(2.45) | 15.21<br>(2.39) | 15.20<br>(2.49) | 15.16<br>(2.39) | 15.33<br>(2.53) | 15.22 | 16.71 | 15.51 | 16.16 | 15.71 | 16.38 | 15.76 | 16.51 | 0.82<br>(0.43)  | 0.89<br>(0.39)  | 1.17<br>(0.26)  | 0.15<br>(0.88)  | 0.83<br>(0.42)  | -1.54<br>(0.14) | -0.46<br>(0.65) |
| Right inferior temporal gyrus          | 10.78<br>(1.13) | 10.82<br>(0.98) | 10.81<br>(1.14) | 10.87<br>(1.04) | 10.76<br>(1.11) | 10.75<br>(1.13) | 10.69<br>(1.13) | 10.81<br>(0.98) | 10.49 | 9.06  | 10.57 | 9.54  | 10.32 | 10.47 | 10.58 | 9.11  | -0.45<br>(0.66) | -0.59<br>(0.56) | -0.95<br>(0.36) | 0.03<br>(0.97)  | 0.19<br>(0.85)  | -0.99<br>(0.34) | -0.29<br>(0.77) |
| Right isthmus cingulate cortex         | 2.84<br>(0.55)  | 2.85<br>(0.50)  | 2.85<br>(0.59)  | 2.84<br>(0.54)  | 2.86<br>(0.56)  | 2.84<br>(0.52)  | 2.86<br>(0.58)  | 2.85<br>(0.54)  | 19.35 | 17.55 | 20.73 | 19.14 | 19.55 | 18.2  | 20.09 | 18.86 | -0.27<br>(0.79) | 0.06<br>(0.96)  | -0.15<br>(0.89) | 0.48<br>(0.64)  | 0.03<br>(0.97)  | 0.56<br>(0.59)  | -0.26<br>(0.80) |
| Right lateral occipital cortex         | 13.27<br>(2.52) | 13.23<br>(2.53) | 13.21<br>(2.47) | 13.22<br>(2.43) | 13.23<br>(2.55) | 13.19<br>(2.32) | 13.18<br>(2.49) | 13.24<br>(2.30) | 18.96 | 19.12 | 18.68 | 18.39 | 19.25 | 17.58 | 18.87 | 17.39 | 0.53<br>(0.60)  | -0.08<br>(0.94) | 0.64<br>(0.53)  | 0.36<br>(0.73)  | 0.73<br>(0.48)  | -0.53<br>(0.61) | 0.32<br>(0.76)  |
| Right lateral orbitofrontal cortex     | 8.06<br>(0.98)  | 8.09<br>(0.97)  | 8.22<br>(1.06)  | 8.15<br>(0.85)  | 8.01<br>(0.98)  | 8.10<br>(1.01)  | 8.09<br>(0.84)  | 8.10<br>(0.91)  | 12.20 | 11.93 | 12.89 | 10.46 | 12.23 | 12.51 | 10.36 | 11.19 | -0.34<br>(0.74) | 0.59<br>(0.56)  | -1.20<br>(0.25) | -0.87<br>(0.40) | -0.51<br>(0.62) | -0.07<br>(0.95) | -0.39<br>(0.70) |
| Right lingual gyrus                    | 7.62<br>(1.12)  | 7.58<br>(1.12)  | 7.60<br>(1.13)  | 7.59<br>(1.14)  | 7.60<br>(1.15)  | 7.58<br>(1.10)  | 7.61<br>(1.10)  | 7.58<br>(1.12)  | 14.75 | 14.77 | 14.87 | 14.97 | 15.16 | 14.48 | 14.52 | 14.73 | 0.76<br>(0.46)  | 0.14<br>(0.89)  | 0.62<br>(0.55)  | 0.41<br>(0.69)  | 1.05<br>(0.31)  | 0.40<br>(0.69)  | 0.67<br>(0.51)  |
| Right medial orbitofrontal cortex      | 6.01<br>(0.74)  | 5.99<br>(0.78)  | 5.87<br>(0.75)  | 5.96<br>(0.78)  | 5.95<br>(0.73)  | 5.92<br>(0.70)  | 6.02<br>(0.78)  | 5.92<br>(0.76)  | 12.37 | 13.01 | 12.74 | 13.11 | 12.36 | 11.83 | 12.9  | 12.9  | 0.36<br>(0.72)  | -1.67<br>(0.12) | 1.21<br>(0.24)  | 0.37<br>(0.72)  | 1.71<br>(0.11)  | 1.59<br>(0.13)  | 1.67<br>(0.12)  |
| Right middle temporal gyrus            | 12.16<br>(1.20) | 12.20<br>(1.23) | 12.16<br>(1.23) | 12.18<br>(1.21) | 12.04<br>(1.30) | 12.07<br>(1.30) | 12.01<br>(1.19) | 12.14<br>(1.20) | 9.85  | 10.06 | 10.11 | 9.9   | 10.77 | 10.76 | 9.94  | 9.85  | -0.54<br>(0.60) | -0.25<br>(0.81) | -0.23<br>(0.82) | -0.33<br>(0.74) | 0.89<br>(0.39)  | -1.79<br>(0.09) | 0.32<br>(0.76)  |
| Right parahippocampal gyrus            | 2.20<br>(0.40)  | 2.23<br>(0.42)  | 2.22<br>(0.35)  | 2.23<br>(0.39)  | 2.23<br>(0.42)  | 2.22<br>(0.40)  | 2.24<br>(0.37)  | 2.25<br>(0.40)  | 18.36 | 18.71 | 15.66 | 17.35 | 18.65 | 17.86 | 16.39 | 17.65 | -1.46<br>(0.16) | -0.36<br>(0.72) | -1.52<br>(0.15) | 0.51<br>(0.61)  | -0.69<br>(0.50) | -0.47<br>(0.64) | -2.76<br>(0.01) |
| Right paracentral lobule               | 4.31<br>(0.57)  | 4.26<br>(0.56)  | 4.31<br>(0.62)  | 4.25<br>(0.55)  | 4.33<br>(0.57)  | 4.28<br>(0.56)  | 4.30<br>(0.55)  | 4.26<br>(0.56)  | 13.12 | 13.27 | 14.33 | 12.87 | 13.13 | 12.98 | 12.74 | 13.24 | 1.25<br>(0.23)  | 1.48<br>(0.16)  | 1.34<br>(0.20)  | 1.70<br>(0.11)  | 0.63<br>(0.54)  | 1.35<br>(0.20)  | 1.26<br>(0.23)  |
| Right pars opercularis                 | 4.48<br>(0.54)  | 4.50<br>(0.49)  | 4.50<br>(0.51)  | 4.48<br>(0.44)  | 4.42<br>(0.53)  | 4.48<br>(0.48)  | 4.47<br>(0.49)  | 4.45<br>(0.52)  | 12.00 | 10.88 | 11.33 | 9.72  | 11.95 | 10.8  | 10.95 | 11.72 | -0.58<br>(0.57) | 0.29<br>(0.78)  | -0.07<br>(0.95) | -1.59<br>(0.13) | 0.16<br>(0.87)  | 0.46<br>(0.65)  | 0.83<br>(0.42)  |
| Right pars orbitalis                   | 3.00<br>(0.40)  | 3.01<br>(0.37)  | 3.01<br>(0.37)  | 3.01<br>(0.36)  | 3.00<br>(0.40)  | 2.99<br>(0.41)  | 2.99<br>(0.41)  | 3.03<br>(0.38)  | 13.16 | 12.13 | 12.28 | 12.11 | 13.23 | 13.64 | 13.85 | 12.58 |                 |                 |                 |                 |                 |                 |                 |

|                                                |                 |                 |                 |                 |                 |                 |                 |                 |       |       |       |       |       |       |       |       |                 |                 |                 |                 |                 |                 |                 |
|------------------------------------------------|-----------------|-----------------|-----------------|-----------------|-----------------|-----------------|-----------------|-----------------|-------|-------|-------|-------|-------|-------|-------|-------|-----------------|-----------------|-----------------|-----------------|-----------------|-----------------|-----------------|
| Right posterior cingulate cortex               | 3.66<br>(0.58)  | 3.65<br>(0.58)  | 3.69<br>(0.59)  | 3.65<br>(0.58)  | 3.67<br>(0.59)  | 3.64<br>(0.58)  | 3.68<br>(0.58)  | 3.65<br>(0.59)  | 15.82 | 15.94 | 15.96 | 15.82 | 15.95 | 15.79 | 15.84 | 16.06 | 0.32<br>(0.75)  | 1.15<br>(0.27)  | 0.37<br>(0.72)  | 1.12<br>(0.28)  | 0.84<br>(0.42)  | 0.95<br>(0.36)  | 0.48<br>(0.64)  |
| Right precentral gyrus                         | 14.04<br>(1.49) | 14.04<br>(1.53) | 14.07<br>(1.53) | 14.04<br>(1.54) | 14.03<br>(1.49) | 14.01<br>(1.50) | 14.02<br>(1.45) | 14.10<br>(1.55) | 10.57 | 10.90 | 10.89 | 10.99 | 10.59 | 10.7  | 10.31 | 10.97 | 0.02<br>(0.98)  | 0.30<br>(0.77)  | 0.07<br>(0.95)  | 0.23<br>(0.82)  | 0.40<br>(0.69)  | -0.71<br>(0.49) | -0.55<br>(0.59) |
| Right precuneus                                | 10.80<br>(1.14) | 10.72<br>(1.20) | 10.71<br>(1.16) | 10.76<br>(1.15) | 10.76<br>(1.12) | 10.73<br>(1.16) | 10.70<br>(1.08) | 10.74<br>(1.16) | 10.52 | 11.22 | 10.84 | 10.7  | 10.44 | 10.77 | 10.08 | 10.79 | 1.02<br>(0.32)  | -1.18<br>(0.26) | 0.55<br>(0.59)  | 0.79<br>(0.44)  | 2.08<br>(0.06)  | -0.75<br>(0.46) | 0.69<br>(0.50)  |
| Right rostral anterior cingulate cortex        | 2.38<br>(0.45)  | 2.39<br>(0.42)  | 2.39<br>(0.50)  | 2.37<br>(0.39)  | 2.37<br>(0.44)  | 2.37<br>(0.39)  | 2.37<br>(0.47)  | 2.39<br>(0.42)  | 19.07 | 17.41 | 20.85 | 16.65 | 18.47 | 16.55 | 19.81 | 17.7  | -0.32<br>(0.76) | 0.50<br>(0.62)  | 0.30<br>(0.77)  | 0.11<br>(0.91)  | 0.48<br>(0.64)  | -0.59<br>(0.56) | -0.22<br>(0.83) |
| Right rostral middle frontal gyrus             | 16.08<br>(2.07) | 15.92<br>(1.89) | 16.08<br>(1.98) | 15.92<br>(1.78) | 15.92<br>(2.10) | 15.75<br>(1.97) | 16.01<br>(2.01) | 15.91<br>(1.87) | 12.86 | 11.87 | 12.3  | 11.19 | 13.21 | 12.53 | 12.54 | 11.76 | 0.91<br>(0.38)  | 1.07<br>(0.30)  | 1.01<br>(0.33)  | 1.38<br>(0.19)  | 2.37<br>(0.03)  | 0.77<br>(0.45)  | 1.12<br>(0.28)  |
| Right superior frontal gyrus                   | 23.13<br>(2.42) | 22.99<br>(2.64) | 23.15<br>(2.42) | 22.99<br>(2.50) | 22.95<br>(2.36) | 22.77<br>(2.40) | 23.00<br>(2.39) | 23.02<br>(2.46) | 10.45 | 11.49 | 10.44 | 10.89 | 10.27 | 10.54 | 10.39 | 10.7  | 0.77<br>(0.45)  | 0.84<br>(0.41)  | 0.68<br>(0.50)  | 1.34<br>(0.20)  | 2.08<br>(0.06)  | -0.15<br>(0.88) | 0.61<br>(0.55)  |
| Right superior parietal cortex                 | 13.49<br>(1.59) | 13.57<br>(1.68) | 13.51<br>(1.57) | 13.56<br>(1.61) | 13.51<br>(1.48) | 13.49<br>(1.67) | 13.54<br>(1.51) | 13.56<br>(1.67) | 11.75 | 12.37 | 11.61 | 11.89 | 10.93 | 12.38 | 11.13 | 12.29 | -0.82<br>(0.43) | -0.49<br>(0.63) | -0.66<br>(0.52) | 0.23<br>(0.82)  | 0.09<br>(0.93)  | -0.26<br>(0.80) | -0.71<br>(0.49) |
| Right superior temporal gyrus                  | 12.33<br>(1.25) | 12.18<br>(1.30) | 12.38<br>(1.28) | 12.19<br>(1.24) | 12.29<br>(1.22) | 12.16<br>(1.28) | 12.35<br>(1.25) | 12.27<br>(1.23) | 10.16 | 10.66 | 10.37 | 10.14 | 9.92  | 10.56 | 10.14 | 10.04 | 1.70<br>(0.11)  | 2.64<br>(0.02)  | 1.86<br>(0.08)  | 1.34<br>(0.20)  | 1.62<br>(0.13)  | 1.48<br>(0.16)  | 0.82<br>(0.42)  |
| Right supramarginal gyrus                      | 10.77<br>(1.58) | 10.78<br>(1.65) | 10.71<br>(1.57) | 10.70<br>(1.61) | 10.72<br>(1.61) | 10.71<br>(1.67) | 10.70<br>(1.54) | 10.76<br>(1.62) | 14.70 | 15.30 | 14.65 | 15.01 | 15    | 15.59 | 14.37 | 15    | -0.23<br>(0.82) | 0.36<br>(0.72)  | 1.40<br>(0.18)  | 0.24<br>(0.82)  | 1.14<br>(0.27)  | -1.34<br>(0.20) | 0.11<br>(0.92)  |
| Right frontal pole                             | 1.24<br>(0.12)  | 1.23<br>(0.13)  | 1.27<br>(0.15)  | 1.23<br>(0.16)  | 1.18<br>(0.15)  | 1.19<br>(0.19)  | 1.23<br>(0.11)  | 1.19<br>(0.12)  | 9.52  | 10.31 | 12.12 | 13.15 | 13.05 | 15.8  | 9.14  | 10.18 | 0.19<br>(0.85)  | 1.06<br>(0.31)  | 0.02<br>(0.98)  | -0.36<br>(0.72) | 1.18<br>(0.26)  | 1.64<br>(0.12)  | 2.19<br>(0.05)  |
| Right temporal pole                            | 2.67<br>(0.32)  | 2.67<br>(0.27)  | 2.66<br>(0.29)  | 2.67<br>(0.30)  | 2.62<br>(0.34)  | 2.66<br>(0.28)  | 2.64<br>(0.29)  | 2.61<br>(0.27)  | 12.17 | 10.26 | 10.92 | 11.05 | 12.84 | 10.68 | 10.83 | 10.37 | -0.16<br>(0.87) | -0.20<br>(0.84) | -0.12<br>(0.90) | -0.67<br>(0.52) | 0.12<br>(0.90)  | 0.86<br>(0.40)  | 1.16<br>(0.27)  |
| Right transverse temporal gyrus                | 1.09<br>(0.20)  | 1.07<br>(0.19)  | 1.07<br>(0.19)  | 1.07<br>(0.17)  | 1.08<br>(0.19)  | 1.07<br>(0.18)  | 1.09<br>(0.21)  | 1.07<br>(0.20)  | 18.06 | 17.99 | 18.14 | 15.99 | 17.85 | 16.64 | 19.15 | 18.75 | 1.08<br>(0.30)  | 0.14<br>(0.89)  | 1.07<br>(0.30)  | 0.70<br>(0.50)  | 0.89<br>(0.39)  | 1.39<br>(0.18)  | 1.52<br>(0.15)  |
| Right insula                                   | 7.55<br>(0.91)  | 7.54<br>(0.90)  | 7.44<br>(0.82)  | 7.49<br>(0.92)  | 7.51<br>(0.96)  | 7.47<br>(0.84)  | 7.47<br>(0.92)  | 7.69<br>(0.97)  | 12.10 | 11.88 | 10.97 | 12.33 | 12.79 | 11.26 | 12.28 | 12.66 | 0.10<br>(0.92)  | -0.52<br>(0.61) | 0.59<br>(0.56)  | 0.40<br>(0.69)  | 0.89<br>(0.39)  | -2.36<br>(0.03) | -1.93<br>(0.07) |
| <b>Local cortical surface (cm<sup>2</sup>)</b> |                 |                 |                 |                 |                 |                 |                 |                 |       |       |       |       |       |       |       |       |                 |                 |                 |                 |                 |                 |                 |
| Left banks superior temporal sulcus            | 10.73<br>(1.96) | 10.67<br>(1.97) | 10.64<br>(1.83) | 10.74<br>(1.88) | 10.67<br>(2.00) | 10.58<br>(1.94) | 10.52<br>(1.77) | 10.66<br>(1.84) | 18.24 | 18.42 | 17.22 | 17.53 | 18.75 | 18.31 | 16.81 | 17.28 | 0.53<br>(0.60)  | -1.04<br>(0.31) | -0.12<br>(0.91) | 1.07<br>(0.30)  | 1.27<br>(0.22)  | -1.72<br>(0.11) | 0.68<br>(0.51)  |
| Left caudal anterior cingulate cortex          | 6.99<br>(1.84)  | 6.88<br>(1.72)  | 6.92<br>(1.81)  | 6.93<br>(1.95)  | 6.97<br>(1.82)  | 7.00<br>(1.89)  | 6.98<br>(1.74)  | 7.05<br>(1.85)  | 26.35 | 24.97 | 26.2  | 28.14 | 26.11 | 26.97 | 24.92 | 26.21 | 1.42<br>(0.18)  | -0.03<br>(0.98) | 0.91<br>(0.38)  | -0.30<br>(0.77) | -0.09<br>(0.93) | -1.42<br>(0.18) | -1.48<br>(0.16) |
| Left caudal middle frontal gyrus               | 24.06<br>(3.51) | 24.18<br>(3.43) | 23.97<br>(3.38) | 24.10<br>(3.48) | 24.11<br>(3.43) | 24.14<br>(3.47) | 24.20<br>(3.44) | 24.17<br>(3.48) | 14.60 | 14.19 | 14.1  | 14.45 | 14.22 | 14.37 | 14.22 | 14.39 | -1.04<br>(0.32) | -1.05<br>(0.31) | -0.23<br>(0.82) | -0.22<br>(0.83) | -0.53<br>(0.61) | 0.23<br>(0.82)  | -0.91<br>(0.38) |
| Left cuneus                                    | 16.57<br>(2.40) | 16.47<br>(2.39) | 16.51<br>(2.40) | 16.56<br>(2.39) | 16.54<br>(2.41) | 16.62<br>(2.58) | 16.65<br>(2.67) | 16.62<br>(2.56) | 14.49 | 14.52 | 14.56 | 14.44 | 14.59 | 15.54 | 16.05 | 15.4  | 0.79<br>(0.44)  | -0.51<br>(0.62) | 0.07<br>(0.94)  | -0.60<br>(0.56) | -0.42<br>(0.68) | 0.27<br>(0.79)  | -0.58<br>(0.57) |
| Left entorhinal cortex                         | 4.47<br>(0.80)  | 4.50<br>(0.75)  | 4.46<br>(0.76)  | 4.50<br>(0.78)  | 4.47<br>(0.72)  | 4.46<br>(0.72)  | 4.52<br>(0.88)  | 4.44<br>(0.77)  | 17.98 | 16.62 | 17.06 | 17.26 | 15.98 | 16.19 | 19.52 | 17.44 | -0.25<br>(0.81) | -0.52<br>(0.61) | -0.28<br>(0.79) | 0.23<br>(0.82)  | 0.11<br>(0.91)  | 1.01<br>(0.33)  | 0.31<br>(0.76)  |
| Left fusiform gyrus                            | 33.50<br>(4.76) | 33.70<br>(4.76) | 33.40<br>(4.70) | 33.66<br>(4.60) | 33.37<br>(4.73) | 33.54<br>(4.71) | 33.49<br>(4.84) | 33.88<br>(4.89) | 14.20 | 14.13 | 14.09 | 13.66 | 14.17 | 14.05 | 14.44 | 14.43 | -1.15<br>(0.27) | -1.31<br>(0.21) | -0.74<br>(0.47) | -0.84<br>(0.41) | -0.19<br>(0.85) | -2.07<br>(0.06) | -2.24<br>(0.04) |
| Left inferior parietal cortex                  | 48.10<br>(7.38) | 48.05<br>(7.57) | 47.97<br>(7.59) | 47.94<br>(7.52) | 48.06<br>(7.65) | 48.21<br>(7.84) | 48.31<br>(7.33) | 48.05<br>(7.59) | 15.35 | 15.75 | 15.83 | 15.68 | 15.93 | 16.27 | 15.17 | 15.8  | 0.24<br>(0.81)  | 0.17<br>(0.87)  | 0.85<br>(0.41)  | -0.52<br>(0.61) | -0.43<br>(0.68) | 1.29<br>(0.22)  | 0.32<br>(0.76)  |
| Left inferior temporal gyrus                   | 35.51<br>(5.18) | 35.38<br>(5.35) | 35.61<br>(5.42) | 35.44<br>(5.20) | 35.61<br>(5.23) | 35.56<br>(5.35) | 35.48<br>(5.27) | 35.43<br>(5.49) | 14.58 | 15.12 | 15.23 | 14.66 | 14.69 | 15.06 | 14.86 | 15.5  | 0.65<br>(0.52)  | 0.55<br>(0.59)  | 0.36<br>(0.72)  | 0.24<br>(0.81)  | -0.22<br>(0.83) | 0.29<br>(0.77)  | 0.46<br>(0.65)  |
| Left isthmus cingulate cortex                  | 10.67<br>(1.72) | 10.75<br>(1.89) | 10.73<br>(1.80) | 10.68<br>(1.87) | 10.73<br>(1.92) | 10.77<br>(1.79) | 10.73<br>(1.80) | 10.68<br>(1.74) | 16.10 | 17.57 | 16.78 | 17.48 | 17.87 | 16.6  | 16.73 | 16.25 | -0.72<br>(0.48) | 0.46<br>(0.65)  | -0.15<br>(0.88) | -0.53<br>(0.60) | -1.54<br>(0.14) | 0.52<br>(0.61)  | -0.12<br>(0.90) |
| Left lateral occipital cortex                  | 52.89<br>(9.37) | 53.15<br>(9.52) | 52.67<br>(9.05) | 53.10<br>(9.17) | 52.75<br>(9.41) | 52.82<br>(9.28) | 52.73<br>(9.25) | 53.20<br>(9.33) | 17.71 | 17.91 | 17.19 | 17.27 | 17.84 | 17.56 | 17.54 | 17.54 | -1.19<br>(0.25) | -2.20<br>(0.04) | -0.84<br>(0.41) | -0.28<br>(0.79) | 0.26<br>(0.80)  | -2.34<br>(0.03) | -1.70<br>(0.11) |
| Left lateral orbitofrontal cortex              | 27.74<br>(3.67) | 27.46<br>(3.68) | 27.89<br>(3.45) | 27.66<br>(3.55) | 27.74<br>(3.75) | 27.50<br>(3.63) | 27.94<br>(3.74) | 27.54<br>(3.53) | 13.23 | 13.41 | 12.39 | 12.84 | 13.52 | 13.21 | 13.4  | 12.83 | 1.09<br>(0.29)  | 1.21<br>(0.24)  | 0.31<br>(0.76)  | 0.93<br>(0.37)  | 0.98<br>(0.34)  | 1.57<br>(0.14)  | 0.72<br>(0.48)  |
| Left lingual gyrus                             | 32.10<br>(4.53) | 32.40<br>(4.75) | 32.28<br>(4.76) | 32.54<br>(4.66) | 32.32<br>(4.71) | 32.39<br>(4.85) | 32.37<br>(4.83) | 32.52<br>(4.86) | 14.10 | 14.65 | 14.74 | 14.32 | 14.59 | 14.96 | 14.92 | 14.95 | -1.40<br>(0.18) | -1.86<br>(0.08) | -3.55<br>(0.00) | -0.44<br>(0.67) | -1.44<br>(0.17) | -1.00<br>(0.33) | -2.44<br>(0.03) |
| Left medial orbitofrontal cortex               | 19.04<br>(3.23) | 19.22<br>(3.14) | 18.59<br>(2.16) | 19.23<br>(2.73) | 18.81<br>(3.12) | 19.10<br>(2.85) | 19.20<br>(3.21) | 19.39<br>(3.24) | 16.98 | 16.35 | 11.62 | 14.18 | 16.6  | 14.9  | 16.71 | 16.7  | -0.41<br>(0.68) | -1.30<br>(0.21) | -0.37<br>(0.71) | -0.57<br>(0.58) | -0.10<br>(0.92) | -0.47<br>(0.64) | -0.63<br>(0.54) |
| Left middle temporal gyrus                     | 32.69<br>(3.38) | 32.70<br>(3.36) | 32.74<br>(3.21) | 32.76<br>(3.46) | 32.82<br>(3.32) | 32.92<br>(3.40) | 32.82<br>(3.53) | 32.88<br>(3.33) | 10.34 | 10.26 | 9.81  | 10.56 | 10.12 | 10.33 | 10.75 | 10.11 | -0.09<br>(0.93) | -0.07<br>(0.94) | -0.34<br>(0.74) | -0.58<br>(0.57) | -1.29<br>(0.22) | -0.29<br>(0.78) | -0.91<br>(0.38) |
| Left parahippocampal gyrus                     | 6.97<br>(1.16)  | 6.89<br>(1.11)  | 6.94<br>(1.19)  | 6.94<br>(1.19)  | 6.89<br>(1.27)  | 6.95<br>(1.18)  | 6.97<br>(1.20)  | 6.89<br>(1.08)  | 16.65 | 16.08 | 17.17 | 17.09 | 18.51 | 16.97 | 17.24 | 15.64 | 1.20<br>(0.25)  | -0.06<br>(0.95) | 0.34<br>(0.74)  | -0.88<br>(0.39) | 0.30<br>(0.77)  | 0.99<br>(0.34)  | 1.08<br>(0.30)  |
| Left paracentral lobule                        | 14.06<br>(2.35) | 14.01<br>(2.30) | 14.11<br>(2.38) | 14.05<br>(2.44) | 14.07<br>(2.39) | 14.09<br>(2.39) | 14.02<br>(2.35) | 14.08<br>(2.39) | 16.74 | 16.45 | 16.87 | 17.4  | 17    | 16.94 | 16.73 | 16.99 | 0.68<br>(0.51)  | 0.89<br>(0.39)  | 0.10<br>(0.92)  | -0.35<br>(0.73) | -0.61<br>(0.55) | -0.68<br>(0.51) | -0.34<br>(0.74) |
| Left pars opercularis                          | 17.21<br>(2.88) | 16.95<br>(2.74) | 16.96<br>(2.86) | 17.04<br>(2.69) | 16.98<br>(2.92) | 17.00<br>(2.75) | 16.97<br>(2.72) | 16.97<br>(2.64) | 16.76 | 16.19 | 16.83 | 15.78 | 17.18 | 16.19 | 16    | 15.58 | 2.09<br>(0.05)  | -0.54<br>(0.60) | 1.10<br>(0.29)  | -0.19<br>(0.85) | 1.71<br>(0.11)  | 0.01<br>(0.99)  | 1.83<br>(0.09)  |
| Left pars orbitalis                            | 7.33<br>(1.17)  | 7.43<br>(1.06)  | 7.35<br>(1.14)  | 7.40<br>(1.10)  | 7.36<br>(1.18)  | 7.33<br>(1.16)  | 7.37<br>(1.27)  | 7.44<br>(1.14)  | 16.01 | 14.30 | 15.53 | 14.94 | 16.07 | 15.79 | 17.21 | 15.34 | -1.14<br>(0.27) | -0.71<br>(0.49) | -0.89<br>(0.39) | 0.54<br>(0.60)  | 0.14<br>(0.89)  | -0.73<br>(0.48) | -1.44<br>(0.17) |
| Left pars triangularis                         | 14.32<br>(3.12) | 14.31<br>(3.10) | 14.40<br>(3.09) | 14.31<br>(3.09) | 14.34<br>(3.21) | 14.34<br>(3.06) | 14.45<br>(3.08) | 14.24<br>(3.12) | 21.79 | 21.63 | 21.49 | 21.61 | 22.38 | 21.37 | 21.31 | 21.91 | 0.06<br>(0.95)  | 0.84<br>(0.41)  | 0.11<br>(0.91)  | -0.03<br>(0.97) | -0.26<br>(0.80) | 1.76<br>(0.10)  | 0.83<br>(0.42)  |
| Left pericalcarine cortex                      | 15.15<br>(2.94) | 15.12<br>(2.87) | 15.22<br>(2.97) | 15.35<br>(2.96) | 15.21<br>(2.95) | 15.27<br>(2.95) | 15.21<br>(3.03) | 15.15<br>(2.82) | 19.42 | 18.99 | 19.54 | 19.25 | 19.42 | 19.33 | 19.91 | 18.64 | 0.23<br>(0.82)  | -1.09<br>(0.29) | -1.90<br>(0.08) | -0.66<br>(0.52) | -1.28<br>(0.22) | 0.43<br>(0.67)  | 0.01<br>(0.99)  |
| Left postcentral gyrus                         | 42.60<br>(5.03) | 42.68<br>(5.34) | 42.74<br>(5.11) | 42.54<br>(5.12) | 42.66<br>(5.12) | 42.52<br>(5.04) | 42.72<br>(5.12) | 42.55<br>(5.23) | 11.82 | 12.52 | 11.95 | 12.03 | 12.01 | 11.85 | 11.99 | 12.29 | -0.55<br>(0.59) | 1.47<br>(0.16)  | 0.54<br>(0.59)  | 1.37<br>(0.19)  | 0.96<br>(0.35)  | 1.14<br>(0.27)  | 0.52<br>(0.61)  |
| Left posterior cingulate cortex                | 12.75<br>(2.23) | 12.76<br>(2.24) | 12.75<br>(2.14) | 12.75<br>(2.21) | 12.76<br>(2.19) | 12.77<br>(2.23) | 12.80<br>(2.25) | 12.75<br>(2.21) | 17.47 | 17.59 | 16.83 | 17.33 | 17.16 | 17.42 | 17.55 | 17.3  | -0.05<br>(0.96) | -0.10<br>(0.92) | -0.01<br>(0.99) | -0.11<br>(0.91) | -0.17<br>(0.87) | 0.50<br>(0.62)  | 0.00<br>(1.00)  |
| Left precentral gyrus                          | 48.01<br>(5.09) | 48.28<br>(5.09) | 48.19<br>(5.16) | 48.15<br>(5.38) | 48.06<br>(5.10) | 48.08<br>(5.32) | 48.06<br>(5.18) | 48.08<br>(5.32) | 10.60 | 10.54 | 10.7  | 11.17 | 10.61 | 11.06 | 1     |       |                 |                 |                 |                 |                 |                 |                 |

|                                         |                  |                  |                  |                  |                  |                  |                  |                  |       |       |       |       |       |       |       |       |                 |                 |                 |                 |                 |                 |                 |
|-----------------------------------------|------------------|------------------|------------------|------------------|------------------|------------------|------------------|------------------|-------|-------|-------|-------|-------|-------|-------|-------|-----------------|-----------------|-----------------|-----------------|-----------------|-----------------|-----------------|
| Left superior frontal gyrus             | 77.07<br>(9.71)  | 77.00<br>(9.52)  | 77.19<br>(9.63)  | 76.98<br>(9.20)  | 76.90<br>(9.82)  | 76.59<br>(9.24)  | 77.26<br>(9.64)  | 77.05<br>(9.20)  | 12.60 | 12.37 | 12.48 | 11.95 | 12.77 | 12.06 | 12.47 | 11.94 | 0.22<br>(0.83)  | 0.65<br>(0.53)  | 0.30<br>(0.77)  | 0.94<br>(0.36)  | 1.75<br>(0.10)  | 0.65<br>(0.53)  | 0.07<br>(0.95)  |
| Left superior parietal cortex           | 58.92<br>(6.15)  | 58.97<br>(6.18)  | 58.80<br>(6.18)  | 59.08<br>(6.22)  | 58.96<br>(6.23)  | 58.85<br>(6.33)  | 58.90<br>(6.38)  | 58.80<br>(6.02)  | 10.44 | 10.49 | 10.52 | 10.53 | 10.56 | 10.76 | 10.84 | 10.23 | -0.43<br>(0.67) | -2.32<br>(0.03) | -1.24<br>(0.23) | 0.68<br>(0.51)  | 0.46<br>(0.66)  | 0.69<br>(0.50)  | 1.06<br>(0.31)  |
| Left superior temporal gyrus            | 38.37<br>(4.67)  | 38.66<br>(4.81)  | 38.68<br>(4.80)  | 38.59<br>(4.72)  | 38.54<br>(4.71)  | 38.57<br>(4.75)  | 38.70<br>(4.79)  | 38.66<br>(4.63)  | 12.17 | 12.44 | 12.4  | 12.23 | 12.21 | 12.32 | 12.39 | 11.98 | -2.37<br>(0.03) | 0.91<br>(0.37)  | -1.53<br>(0.15) | -0.26<br>(0.80) | -1.58<br>(0.14) | 0.25<br>(0.81)  | -1.82<br>(0.09) |
| Left supramarginal gyrus                | 42.86<br>(6.42)  | 42.48<br>(6.28)  | 42.73<br>(6.34)  | 42.65<br>(6.36)  | 42.62<br>(6.39)  | 42.68<br>(6.27)  | 42.75<br>(6.54)  | 42.75<br>(6.30)  | 14.98 | 14.78 | 14.83 | 14.91 | 15    | 14.69 | 15.3  | 14.74 | 1.85<br>(0.08)  | 0.59<br>(0.56)  | 0.91<br>(0.38)  | -0.37<br>(0.72) | 1.10<br>(0.29)  | 0.01<br>(0.99)  | 0.66<br>(0.52)  |
| Left frontal pole                       | 2.68<br>(0.20)   | 2.61<br>(0.25)   | 2.68<br>(0.26)   | 2.66<br>(0.21)   | 2.65<br>(0.22)   | 2.65<br>(0.29)   | 2.72<br>(0.25)   | 2.67<br>(0.26)   | 7.27  | 9.52  | 9.53  | 8.09  | 8.4   | 10.75 | 9.21  | 9.65  | 1.34<br>(0.20)  | 0.50<br>(0.63)  | 0.59<br>(0.57)  | -0.07<br>(0.95) | 0.50<br>(0.63)  | 1.16<br>(0.26)  | 0.33<br>(0.75)  |
| Left temporal pole                      | 4.84<br>(0.44)   | 4.82<br>(0.36)   | 4.90<br>(0.37)   | 4.93<br>(0.35)   | 4.83<br>(0.34)   | 4.88<br>(0.37)   | 4.90<br>(0.36)   | 4.85<br>(0.40)   | 9.06  | 7.47  | 7.61  | 7.13  | 7.09  | 7.66  | 7.4   | 8.23  | 0.26<br>(0.80)  | -0.33<br>(0.75) | -1.29<br>(0.22) | -0.73<br>(0.48) | -0.55<br>(0.59) | 0.57<br>(0.58)  | -0.20<br>(0.85) |
| Left transverse temporal gyrus          | 4.46<br>(0.59)   | 4.51<br>(0.68)   | 4.47<br>(0.59)   | 4.45<br>(0.59)   | 4.48<br>(0.67)   | 4.45<br>(0.59)   | 4.48<br>(0.60)   | 4.49<br>(0.61)   | 13.23 | 15.05 | 13.16 | 13.36 | 14.86 | 13.33 | 13.32 | 13.69 | -0.93<br>(0.37) | 0.68<br>(0.51)  | 0.64<br>(0.53)  | 0.80<br>(0.44)  | 0.45<br>(0.66)  | -0.49<br>(0.63) | -1.36<br>(0.19) |
| Left insula                             | 24.63<br>(3.08)  | 24.65<br>(1.89)  | 25.19<br>(4.27)  | 24.73<br>(2.98)  | 25.50<br>(3.38)  | 25.01<br>(3.00)  | 25.14<br>(3.10)  | 24.70<br>(2.54)  | 12.50 | 7.67  | 16.95 | 12.06 | 13.24 | 11.99 | 12.34 | 10.27 | -0.03<br>(0.97) | 0.87<br>(0.40)  | -0.14<br>(0.89) | 0.81<br>(0.43)  | -0.64<br>(0.53) | 0.84<br>(0.41)  | -0.12<br>(0.91) |
| Right banks superior temporal sulcus    | 9.18<br>(1.21)   | 9.23<br>(1.39)   | 9.23<br>(1.25)   | 9.30<br>(1.32)   | 9.34<br>(1.33)   | 9.06<br>(1.39)   | 9.28<br>(1.48)   | 9.21<br>(1.42)   | 13.13 | 15.02 | 13.57 | 14.24 | 14.26 | 15.34 | 15.95 | 15.41 | -0.71<br>(0.49) | -0.89<br>(0.39) | -1.75<br>(0.10) | 3.03<br>(0.01)  | 1.21<br>(0.24)  | 0.86<br>(0.41)  | -0.25<br>(0.81) |
| Right caudal anterior cingulate cortex  | 8.28<br>(2.09)   | 8.14<br>(1.78)   | 8.24<br>(2.01)   | 8.15<br>(1.77)   | 8.28<br>(2.01)   | 8.19<br>(1.86)   | 8.32<br>(2.13)   | 8.23<br>(1.91)   | 25.24 | 21.82 | 24.38 | 21.76 | 24.31 | 22.77 | 25.63 | 23.25 | 1.06<br>(0.31)  | 0.61<br>(0.55)  | 0.67<br>(0.51)  | 0.99<br>(0.34)  | 0.75<br>(0.46)  | 0.62<br>(0.54)  | 0.37<br>(0.72)  |
| Right caudal middle frontal gyrus       | 23.13<br>(3.24)  | 23.02<br>(3.17)  | 23.11<br>(3.32)  | 22.92<br>(3.28)  | 23.14<br>(3.11)  | 23.18<br>(3.17)  | 23.06<br>(3.20)  | 23.14<br>(3.14)  | 14.03 | 13.76 | 14.38 | 14.3  | 13.42 | 13.69 | 13.89 | 13.55 | 0.77<br>(0.45)  | 1.80<br>(0.09)  | 1.26<br>(0.23)  | -0.22<br>(0.83) | -0.28<br>(0.78) | -0.55<br>(0.59) | -0.11<br>(0.91) |
| Right cuneus                            | 17.63<br>(3.02)  | 17.70<br>(3.34)  | 17.72<br>(3.20)  | 17.70<br>(3.24)  | 17.47<br>(2.92)  | 17.64<br>(3.30)  | 17.47<br>(3.02)  | 17.72<br>(3.27)  | 17.12 | 18.86 | 18.06 | 18.29 | 16.72 | 18.7  | 17.27 | 18.43 | -0.68<br>(0.51) | 0.13<br>(0.90)  | -0.78<br>(0.45) | -1.18<br>(0.25) | -0.11<br>(0.92) | -2.34<br>(0.03) | -0.76<br>(0.46) |
| Right entorhinal cortex                 | 4.12<br>(0.84)   | 4.05<br>(0.93)   | 4.03<br>(0.92)   | 3.99<br>(1.06)   | 4.07<br>(0.89)   | 4.08<br>(0.89)   | 4.08<br>(0.92)   | 4.18<br>(1.00)   | 20.40 | 22.87 | 22.84 | 26.6  | 21.93 | 21.82 | 22.51 | 23.99 | 0.60<br>(0.56)  | 0.24<br>(0.81)  | 0.89<br>(0.39)  | -0.17<br>(0.87) | 0.32<br>(0.76)  | -1.03<br>(0.32) | -0.55<br>(0.59) |
| Right fusiform gyrus                    | 31.00<br>(6.02)  | 31.23<br>(6.15)  | 30.94<br>(5.76)  | 31.14<br>(5.99)  | 30.98<br>(5.54)  | 31.18<br>(6.16)  | 31.11<br>(6.04)  | 31.01<br>(5.93)  | 19.43 | 19.71 | 18.61 | 19.25 | 17.89 | 19.76 | 19.42 | 19.12 | -1.54<br>(0.14) | -0.95<br>(0.36) | -0.71<br>(0.49) | -0.96<br>(0.35) | -1.21<br>(0.25) | 0.64<br>(0.53)  | -0.07<br>(0.95) |
| Right inferior parietal cortex          | 55.65<br>(7.98)  | 55.29<br>(8.15)  | 55.67<br>(7.94)  | 55.26<br>(8.21)  | 55.56<br>(8.24)  | 55.49<br>(8.14)  | 55.35<br>(8.06)  | 55.59<br>(8.17)  | 14.34 | 14.73 | 14.26 | 14.86 | 14.84 | 14.68 | 14.56 | 14.69 | 1.42<br>(0.18)  | 1.21<br>(0.25)  | 1.45<br>(0.17)  | 0.18<br>(0.86)  | 0.48<br>(0.64)  | -0.97<br>(0.35) | 0.36<br>(0.72)  |
| Right inferior temporal gyrus           | 33.69<br>(4.38)  | 33.78<br>(3.84)  | 33.78<br>(4.36)  | 33.97<br>(4.18)  | 33.80<br>(4.26)  | 33.82<br>(4.12)  | 33.54<br>(4.31)  | 33.80<br>(4.04)  | 13.00 | 11.37 | 12.9  | 12.29 | 12.62 | 12.18 | 12.86 | 11.96 | -0.37<br>(0.71) | -1.13<br>(0.28) | -1.57<br>(0.14) | -0.05<br>(0.96) | -0.55<br>(0.59) | -1.12<br>(0.28) | -0.48<br>(0.64) |
| Right isthmus cingulate cortex          | 9.66<br>(1.80)   | 9.75<br>(1.88)   | 9.71<br>(2.08)   | 9.72<br>(2.00)   | 9.74<br>(1.96)   | 9.63<br>(1.94)   | 9.76<br>(2.06)   | 9.77<br>(2.12)   | 18.67 | 19.30 | 21.38 | 20.58 | 20.13 | 20.17 | 21.06 | 21.71 | -1.17<br>(0.26) | -0.13<br>(0.90) | -0.78<br>(0.45) | 1.39<br>(0.19)  | 0.35<br>(0.73)  | -0.04<br>(0.97) | -1.10<br>(0.29) |
| Right lateral occipital cortex          | 52.98<br>(11.06) | 52.73<br>(11.63) | 52.79<br>(10.92) | 52.79<br>(11.23) | 52.87<br>(10.68) | 52.51<br>(10.68) | 52.80<br>(11.02) | 52.55<br>(10.77) | 20.87 | 22.05 | 20.68 | 21.27 | 21.21 | 20.34 | 20.88 | 20.49 | 1.11<br>(0.28)  | 0.02<br>(0.98)  | 1.15<br>(0.27)  | 1.39<br>(0.19)  | 1.55<br>(0.14)  | 0.77<br>(0.45)  | 1.63<br>(0.12)  |
| Right lateral orbitofrontal cortex      | 28.24<br>(3.86)  | 28.37<br>(4.30)  | 29.09<br>(4.30)  | 28.78<br>(3.80)  | 28.04<br>(4.01)  | 28.60<br>(4.39)  | 28.63<br>(3.27)  | 28.49<br>(3.99)  | 13.67 | 15.14 | 14.77 | 13.21 | 14.29 | 15.35 | 11.43 | 14.02 | -0.27<br>(0.79) | 1.19<br>(0.25)  | -1.26<br>(0.23) | -1.09<br>(0.29) | -0.81<br>(0.43) | 0.26<br>(0.80)  | -0.55<br>(0.59) |
| Right lingual gyrus                     | 34.07<br>(5.11)  | 34.06<br>(5.14)  | 34.03<br>(5.18)  | 34.33<br>(5.32)  | 34.05<br>(5.17)  | 34.15<br>(5.16)  | 34.04<br>(4.98)  | 34.28<br>(5.37)  | 14.98 | 15.09 | 15.21 | 15.51 | 15.2  | 15.12 | 14.64 | 15.65 | 0.08<br>(0.94)  | -2.01<br>(0.06) | -1.44<br>(0.17) | -0.77<br>(0.46) | -0.56<br>(0.58) | -1.05<br>(0.31) | -1.00<br>(0.33) |
| Right medial orbitofrontal cortex       | 20.64<br>(2.52)  | 20.75<br>(2.80)  | 20.24<br>(2.53)  | 20.65<br>(2.75)  | 20.62<br>(2.77)  | 20.79<br>(2.45)  | 20.86<br>(2.77)  | 20.49<br>(2.62)  | 12.21 | 13.51 | 12.5  | 13.3  | 13.44 | 11.77 | 13.27 | 12.78 | -0.46<br>(0.65) | -1.86<br>(0.08) | -0.09<br>(0.93) | -0.50<br>(0.63) | -0.54<br>(0.59) | 1.28<br>(0.22)  | 0.73<br>(0.48)  |
| Right middle temporal gyrus             | 35.50<br>(3.93)  | 35.58<br>(3.93)  | 35.52<br>(3.94)  | 35.51<br>(3.86)  | 35.35<br>(4.10)  | 35.55<br>(3.85)  | 35.50<br>(3.97)  | 35.57<br>(3.75)  | 11.06 | 11.04 | 11.09 | 10.86 | 11.59 | 10.82 | 11.18 | 10.55 | -0.56<br>(0.58) | 0.00<br>(1.00)  | -0.08<br>(0.94) | -0.97<br>(0.35) | -0.35<br>(0.73) | -0.55<br>(0.59) | -0.73<br>(0.48) |
| Right parahippocampal gyrus             | 6.29<br>(1.22)   | 6.41<br>(1.21)   | 6.34<br>(1.05)   | 6.40<br>(1.15)   | 6.37<br>(1.26)   | 6.35<br>(1.17)   | 6.38<br>(1.15)   | 6.44<br>(1.20)   | 19.33 | 18.91 | 16.64 | 17.94 | 19.74 | 18.46 | 18.06 | 18.57 | -2.31<br>(0.04) | -0.74<br>(0.47) | -2.03<br>(0.06) | 0.22<br>(0.83)  | -0.92<br>(0.37) | -1.10<br>(0.29) | -2.75<br>(0.01) |
| Right paracentral lobule                | 15.83<br>(2.08)  | 15.81<br>(2.16)  | 15.88<br>(2.23)  | 15.81<br>(2.09)  | 15.84<br>(2.10)  | 15.86<br>(2.09)  | 15.84<br>(2.05)  | 15.81<br>(2.08)  | 13.13 | 13.68 | 14.03 | 13.25 | 13.23 | 13.19 | 12.96 | 13.17 | 0.16<br>(0.87)  | 0.58<br>(0.57)  | 0.21<br>(0.83)  | -0.21<br>(0.84) | -0.24<br>(0.81) | 0.31<br>(0.76)  | 0.17<br>(0.86)  |
| Right pars opercularis                  | 15.47<br>(2.01)  | 15.53<br>(1.95)  | 15.51<br>(1.90)  | 15.47<br>(1.77)  | 15.31<br>(1.95)  | 15.49<br>(1.82)  | 15.52<br>(2.00)  | 15.34<br>(2.10)  | 13.02 | 12.55 | 12.26 | 11.46 | 12.76 | 11.76 | 12.89 | 13.67 | -0.63<br>(0.54) | 0.32<br>(0.75)  | 0.03<br>(0.98)  | -1.71<br>(0.11) | -0.16<br>(0.88) | 1.00<br>(0.33)  | 1.15<br>(0.27)  |
| Right pars orbitalis                    | 8.90<br>(1.43)   | 8.90<br>(1.37)   | 8.90<br>(1.43)   | 8.96<br>(1.43)   | 8.90<br>(1.54)   | 8.94<br>(1.49)   | 8.90<br>(1.52)   | 8.95<br>(1.42)   | 16.01 | 15.44 | 16.12 | 15.95 | 17.27 | 16.67 | 17.1  | 15.91 | 0.16<br>(0.88)  | -0.89<br>(0.39) | -0.90<br>(0.38) | -0.63<br>(0.54) | -0.55<br>(0.59) | -0.90<br>(0.38) | -0.65<br>(0.53) |
| Right pars triangularis                 | 16.86<br>(2.91)  | 16.78<br>(2.88)  | 16.89<br>(3.11)  | 16.81<br>(3.06)  | 17.00<br>(3.05)  | 16.73<br>(2.85)  | 16.97<br>(2.98)  | 16.88<br>(2.84)  | 17.23 | 17.18 | 18.41 | 18.2  | 17.92 | 17.04 | 17.59 | 16.81 | 0.86<br>(0.40)  | 0.89<br>(0.39)  | 0.61<br>(0.55)  | 2.72<br>(0.02)  | 1.27<br>(0.22)  | 0.91<br>(0.38)  | -0.26<br>(0.80) |
| Right pericalcarine cortex              | 17.05<br>(3.07)  | 17.14<br>(3.23)  | 17.10<br>(3.14)  | 17.15<br>(3.22)  | 16.85<br>(3.09)  | 17.17<br>(3.25)  | 16.98<br>(3.02)  | 17.05<br>(3.14)  | 17.99 | 18.81 | 18.39 | 18.78 | 18.36 | 18.95 | 17.81 | 18.41 | -0.75<br>(0.46) | -0.53<br>(0.61) | -0.83<br>(0.42) | -2.46<br>(0.03) | -0.97<br>(0.35) | -0.96<br>(0.35) | 0.00<br>(1.00)  |
| Right postcentral gyrus                 | 40.58<br>(3.23)  | 40.48<br>(3.08)  | 40.74<br>(3.08)  | 40.68<br>(3.18)  | 40.70<br>(3.24)  | 40.61<br>(3.18)  | 40.57<br>(3.24)  | 40.55<br>(3.02)  | 7.97  | 7.62  | 7.57  | 7.81  | 7.97  | 7.83  | 7.98  | 7.44  | 0.65<br>(0.53)  | 0.56<br>(0.59)  | -0.85<br>(0.41) | 0.87<br>(0.40)  | -0.26<br>(0.80) | 0.12<br>(0.91)  | 0.17<br>(0.87)  |
| Right posterior cingulate cortex        | 13.17<br>(1.94)  | 13.19<br>(1.97)  | 13.20<br>(2.04)  | 13.10<br>(2.05)  | 13.11<br>(1.98)  | 13.06<br>(2.01)  | 13.22<br>(2.04)  | 13.12<br>(2.05)  | 14.77 | 14.94 | 15.49 | 15.62 | 15.09 | 15.43 | 15.42 | 15.6  | -0.29<br>(0.77) | 0.90<br>(0.38)  | 0.94<br>(0.36)  | 0.69<br>(0.50)  | 1.80<br>(0.09)  | 1.28<br>(0.22)  | 0.68<br>(0.51)  |
| Right precentral gyrus                  | 49.48<br>(5.68)  | 49.55<br>(5.80)  | 49.54<br>(5.90)  | 49.50<br>(5.89)  | 49.60<br>(5.89)  | 49.52<br>(5.74)  | 49.72<br>(5.70)  | 49.75<br>(5.96)  | 11.48 | 11.71 | 11.9  | 11.91 | 11.87 | 11.6  | 11.47 | 11.99 | -0.49<br>(0.63) | 0.26<br>(0.80)  | -0.12<br>(0.90) | 0.70<br>(0.50)  | -0.22<br>(0.83) | -0.21<br>(0.84) | -1.46<br>(0.16) |
| Right precuneus                         | 41.22<br>(5.10)  | 41.04<br>(5.10)  | 41.08<br>(4.98)  | 41.08<br>(5.08)  | 41.16<br>(4.90)  | 41.11<br>(5.07)  | 41.01<br>(4.98)  | 41.12<br>(4.96)  | 12.36 | 12.43 | 12.13 | 12.36 | 11.92 | 12.33 | 12.14 | 12.06 | 1.12<br>(0.28)  | -0.04<br>(0.97) | 1.42<br>(0.18)  | 0.37<br>(0.72)  | 0.83<br>(0.42)  | -0.85<br>(0.41) | 0.71<br>(0.49)  |
| Right rostral anterior cingulate cortex | 6.90<br>(1.47)   | 6.93<br>(1.43)   | 6.94<br>(1.58)   | 6.88<br>(1.34)   | 6.84<br>(1.45)   | 6.85<br>(1.37)   | 6.91<br>(1.52)   | 6.92<br>(1.36)   | 21.35 | 20.66 | 22.8  | 19.41 | 21.25 | 19.97 | 22.01 | 19.67 | -0.47<br>(0.65) | 0.47<br>(0.65)  | 0.19<br>(0.85)  | -0.15<br>(0.88) | 0.65<br>(0.52)  | -0.13<br>(0.90) | -0.19<br>(0.85) |
| Right rostral middle frontal gyrus      | 59.95<br>(8.74)  | 59.76<br>(7.96)  | 59.99<br>(8.53)  | 59.82<br>(7.82)  | 59.79<br>(8.79)  | 59.41<br>(8.11)  | 60.16<br>(8.69)  | 59.85<br>(8.10)  | 14.59 | 13.33 | 14.22 | 13.08 | 14.71 | 13.66 | 14.45 | 13.54 | 0.60<br>(0.56)  | 0.56<br>(0.58)  | 0.38<br>(0.71)  | 1.15<br>(0.27)  | 1.69<br>(0.11)  | 0.95<br>(0.36)  | 0.32<br>(0.75)  |
| Right superior frontal gyrus            | 74.04<br>(8.84)  | 74.09<br>(9.12)  | 74.03<br>(8.69)  | 74.07<br>(8.92)  | 73.80<br>(8.93)  | 73.92<br>(8.91)  | 74.00<br>(8.76)  | 74.09<br>(8.76)  | 11.95 | 12.31 | 11.74 | 12.05 | 12.1  | 12.06 | 11.84 | 11.82 | -0.28<br>(0.78) | -0.13<br>(0.90) | -0.13<br>(0.90) | -0.77<br>(0.45) | 0.63<br>(0.54)  | -0.48<br>(0.64) | -0.29<br>(0.78) |
| Right superior parietal cortex          | 54.85<br>(5.56)  | 55.19<br>(5.59)  | 54.99<br>(5.39)  | 55.30<br>(5.72)  | 55.09<br>(5.21)  | 55.15<br>(5.69)  | 55.34<br>(5.44)  | 55.18<br>(5.66)  | 10.13 | 10.13 | 9.8   | 10.35 | 9.46  | 10.32 | 9.83  | 10.25 | -1.99<br>(0.07) | -1.62<br>(0.13) | -2.23<br>(0.04) | -0.19<br>(0.85) | -1.62<br>(0.13) | 1.31<br>(0.21)  | -1.75<br>(0.10) |
| Right superior temporal gyrus           | 37.23<br>(4.42)  | 37.12<br>(4.22)  | 37.42<br>(4.35)  | 37.19<br>(4.30)  | 37.19<br>(4.19)  | 37.26<br>(4.20)  | 37.43<br>(4.34)  | 37.              |       |       |       |       |       |       |       |       |                 |                 |                 |                 |                 |                 |                 |



|                                        |                 |                 |                 |                 |                 |                 |                 |                 |       |       |       |       |       |       |       |       |                 |                 |                 |                 |                 |                 |                 |
|----------------------------------------|-----------------|-----------------|-----------------|-----------------|-----------------|-----------------|-----------------|-----------------|-------|-------|-------|-------|-------|-------|-------|-------|-----------------|-----------------|-----------------|-----------------|-----------------|-----------------|-----------------|
| Right transverse temporal gyrus        | 3.35<br>(0.45)  | 3.34<br>(0.45)  | 3.33<br>(0.51)  | 3.38<br>(0.43)  | 3.34<br>(0.41)  | 3.37<br>(0.42)  | 3.35<br>(0.45)  | 3.32<br>(0.47)  | 13.37 | 13.34 | 15.36 | 12.76 | 12.39 | 12.52 | 13.49 | 14.23 | 0.26<br>(0.80)  | -1.26<br>(0.23) | -0.91<br>(0.38) | -1.15<br>(0.27) | -0.76<br>(0.46) | 0.68<br>(0.51)  | 0.88<br>(0.39)  |
| Right insula                           | 23.57<br>(3.22) | 23.24<br>(2.71) | 22.86<br>(2.71) | 23.01<br>(3.19) | 23.64<br>(3.56) | 22.92<br>(2.64) | 23.15<br>(2.99) | 24.06<br>(3.61) | 13.67 | 11.64 | 11.86 | 13.87 | 15.08 | 11.51 | 12.91 | 15.01 | 0.92<br>(0.37)  | -0.36<br>(0.73) | 1.67<br>(0.12)  | 1.30<br>(0.21)  | 1.44<br>(0.17)  | -1.86<br>(0.08) | -1.54<br>(0.15) |
| <b>Local cortical thickness (mm)</b>   |                 |                 |                 |                 |                 |                 |                 |                 |       |       |       |       |       |       |       |       |                 |                 |                 |                 |                 |                 |                 |
| Left banks superior temporal sulcus    | 2.61<br>(0.14)  | 2.61<br>(0.15)  | 2.61<br>(0.14)  | 2.61<br>(0.15)  | 2.62<br>(0.14)  | 2.60<br>(0.15)  | 2.62<br>(0.14)  | 2.63<br>(0.15)  | 5.49  | 5.63  | 5.41  | 5.83  | 5.51  | 5.81  | 5.48  | 5.63  | -0.10<br>(0.92) | -0.29<br>(0.78) | -0.07<br>(0.94) | 0.71<br>(0.49)  | 0.48<br>(0.64)  | -0.70<br>(0.50) | -1.19<br>(0.25) |
| Left caudal anterior cingulate cortex  | 2.56<br>(0.16)  | 2.54<br>(0.21)  | 2.56<br>(0.19)  | 2.53<br>(0.22)  | 2.57<br>(0.20)  | 2.52<br>(0.23)  | 2.55<br>(0.20)  | 2.53<br>(0.23)  | 6.13  | 8.29  | 7.46  | 8.89  | 7.77  | 8.94  | 7.88  | 9.2   | 0.62<br>(0.54)  | 1.21<br>(0.24)  | 0.92<br>(0.37)  | 1.54<br>(0.14)  | 1.00<br>(0.33)  | 0.46<br>(0.65)  | 0.60<br>(0.56)  |
| Left caudal middle frontal gyrus       | 2.43<br>(0.09)  | 2.41<br>(0.10)  | 2.43<br>(0.10)  | 2.40<br>(0.09)  | 2.43<br>(0.10)  | 2.40<br>(0.11)  | 2.42<br>(0.09)  | 2.41<br>(0.08)  | 3.66  | 4.06  | 4.23  | 3.78  | 4.32  | 4.56  | 3.78  | 3.3   | 1.20<br>(0.25)  | 1.53<br>(0.15)  | 1.65<br>(0.12)  | 1.93<br>(0.07)  | 1.35<br>(0.20)  | 0.73<br>(0.48)  | 0.84<br>(0.41)  |
| Left cuneus                            | 1.97<br>(0.11)  | 1.97<br>(0.10)  | 1.96<br>(0.10)  | 1.96<br>(0.10)  | 1.96<br>(0.11)  | 1.97<br>(0.11)  | 1.96<br>(0.11)  | 1.96<br>(0.11)  | 5.83  | 4.94  | 5.22  | 5.3   | 5.67  | 5.37  | 5.61  | 5.54  | -0.51<br>(0.62) | -0.14<br>(0.89) | 0.43<br>(0.67)  | -0.43<br>(0.68) | -0.19<br>(0.85) | -0.79<br>(0.44) | 0.11<br>(0.91)  |
| Left entorhinal cortex                 | 3.47<br>(0.34)  | 3.51<br>(0.35)  | 3.45<br>(0.34)  | 3.49<br>(0.36)  | 3.47<br>(0.35)  | 3.52<br>(0.35)  | 3.48<br>(0.36)  | 3.48<br>(0.40)  | 9.80  | 10.10 | 9.91  | 10.25 | 10.04 | 9.81  | 10.23 | 11.38 | -1.05<br>(0.31) | -0.83<br>(0.42) | -0.88<br>(0.39) | -1.18<br>(0.26) | -1.54<br>(0.14) | -0.07<br>(0.95) | -0.48<br>(0.64) |
| Left fusiform gyrus                    | 2.84<br>(0.12)  | 2.85<br>(0.13)  | 2.84<br>(0.12)  | 2.86<br>(0.13)  | 2.84<br>(0.12)  | 2.86<br>(0.12)  | 2.84<br>(0.12)  | 2.86<br>(0.12)  | 4.34  | 4.44  | 4.4   | 4.71  | 4.13  | 4.19  | 4.13  | 4.3   | -1.14<br>(0.27) | -1.35<br>(0.20) | -1.39<br>(0.19) | -1.37<br>(0.19) | -1.48<br>(0.16) | -1.19<br>(0.25) | -1.28<br>(0.22) |
| Left inferior parietal cortex          | 2.53<br>(0.08)  | 2.53<br>(0.06)  | 2.52<br>(0.08)  | 2.54<br>(0.07)  | 2.53<br>(0.07)  | 2.53<br>(0.06)  | 2.53<br>(0.08)  | 2.54<br>(0.07)  | 2.98  | 2.29  | 3.12  | 2.74  | 2.9   | 2.55  | 2.97  | 2.6   | -0.28<br>(0.78) | -1.53<br>(0.15) | -1.17<br>(0.26) | 0.16<br>(0.88)  | -0.19<br>(0.86) | -1.96<br>(0.07) | -1.69<br>(0.11) |
| Left inferior temporal gyrus           | 2.74<br>(0.13)  | 2.75<br>(0.15)  | 2.73<br>(0.14)  | 2.76<br>(0.15)  | 2.73<br>(0.12)  | 2.76<br>(0.14)  | 2.73<br>(0.14)  | 2.77<br>(0.14)  | 4.69  | 5.55  | 5.26  | 5.3   | 4.43  | 5.12  | 5.21  | 5.1   | -0.89<br>(0.39) | -2.31<br>(0.04) | -1.65<br>(0.12) | -1.41<br>(0.18) | -1.46<br>(0.17) | -2.39<br>(0.03) | -2.15<br>(0.05) |
| Left isthmus cingulate cortex          | 2.53<br>(0.21)  | 2.54<br>(0.22)  | 2.51<br>(0.20)  | 2.55<br>(0.24)  | 2.55<br>(0.22)  | 2.53<br>(0.19)  | 2.52<br>(0.19)  | 2.55<br>(0.24)  | 8.40  | 8.70  | 8.07  | 9.26  | 8.53  | 7.53  | 7.71  | 9.28  | -0.57<br>(0.58) | -1.68<br>(0.11) | -1.07<br>(0.30) | 1.26<br>(0.23)  | -0.05<br>(0.96) | -1.36<br>(0.19) | -0.76<br>(0.46) |
| Left lateral occipital cortex          | 2.25<br>(0.08)  | 2.24<br>(0.09)  | 2.26<br>(0.08)  | 2.24<br>(0.08)  | 2.25<br>(0.08)  | 2.24<br>(0.08)  | 2.25<br>(0.08)  | 2.25<br>(0.09)  | 3.39  | 3.89  | 3.64  | 3.75  | 3.56  | 3.64  | 3.73  | 3.91  | 1.36<br>(0.19)  | 1.97<br>(0.07)  | 1.97<br>(0.07)  | 1.66<br>(0.12)  | 1.48<br>(0.16)  | 0.42<br>(0.68)  | -0.10<br>(0.92) |
| Left lateral orbitofrontal cortex      | 2.60<br>(0.12)  | 2.62<br>(0.10)  | 2.59<br>(0.11)  | 2.61<br>(0.11)  | 2.60<br>(0.10)  | 2.62<br>(0.10)  | 2.60<br>(0.12)  | 2.63<br>(0.10)  | 4.44  | 3.99  | 4.42  | 4.28  | 3.88  | 3.88  | 4.49  | 3.94  | -1.33<br>(0.20) | -0.99<br>(0.34) | -0.60<br>(0.56) | -0.97<br>(0.35) | -0.85<br>(0.41) | -2.01<br>(0.06) | -1.87<br>(0.08) |
| Left lingual gyrus                     | 2.07<br>(0.12)  | 2.05<br>(0.14)  | 2.07<br>(0.12)  | 2.04<br>(0.12)  | 2.07<br>(0.12)  | 2.05<br>(0.13)  | 2.06<br>(0.11)  | 2.04<br>(0.13)  | 5.70  | 6.81  | 5.67  | 6.02  | 6.04  | 6.49  | 5.44  | 6.19  | 1.36<br>(0.19)  | 2.09<br>(0.05)  | 2.08<br>(0.06)  | 1.48<br>(0.16)  | 1.42<br>(0.18)  | 1.30<br>(0.21)  | 1.87<br>(0.08)  |
| Left medial orbitofrontal cortex       | 2.39<br>(0.10)  | 2.37<br>(0.10)  | 2.37<br>(0.11)  | 2.36<br>(0.10)  | 2.38<br>(0.08)  | 2.36<br>(0.10)  | 2.38<br>(0.09)  | 2.38<br>(0.11)  | 4.05  | 4.08  | 4.75  | 4.37  | 3.45  | 4.2   | 3.79  | 4.48  | 1.22<br>(0.24)  | 0.21<br>(0.84)  | 1.63<br>(0.12)  | 1.14<br>(0.27)  | 1.52<br>(0.15)  | 0.13<br>(0.90)  | 0.56<br>(0.58)  |
| Left middle temporal gyrus             | 2.80<br>(0.11)  | 2.80<br>(0.12)  | 2.80<br>(0.11)  | 2.80<br>(0.11)  | 2.80<br>(0.10)  | 2.81<br>(0.10)  | 2.80<br>(0.10)  | 2.80<br>(0.12)  | 4.02  | 4.20  | 4.1   | 3.89  | 3.53  | 3.43  | 3.65  | 4.2   | -0.33<br>(0.75) | -0.22<br>(0.83) | -0.42<br>(0.68) | -0.40<br>(0.70) | -0.53<br>(0.60) | -0.09<br>(0.93) | -0.17<br>(0.86) |
| Left parahippocampal gyrus             | 3.03<br>(0.24)  | 3.05<br>(0.23)  | 3.02<br>(0.23)  | 3.03<br>(0.25)  | 3.05<br>(0.25)  | 3.05<br>(0.22)  | 3.04<br>(0.24)  | 3.05<br>(0.22)  | 7.97  | 7.46  | 7.49  | 8.29  | 8.21  | 7.36  | 7.87  | 7.32  | -1.09<br>(0.29) | -0.43<br>(0.67) | 0.15<br>(0.88)  | 0.28<br>(0.78)  | -0.73<br>(0.48) | -0.74<br>(0.47) | -0.74<br>(0.47) |
| Left paracentral lobule                | 2.50<br>(0.10)  | 2.50<br>(0.11)  | 2.50<br>(0.12)  | 2.49<br>(0.13)  | 2.51<br>(0.12)  | 2.50<br>(0.14)  | 2.51<br>(0.12)  | 2.51<br>(0.13)  | 4.11  | 4.49  | 4.84  | 5.22  | 4.95  | 5.59  | 4.67  | 5.2   | 0.28<br>(0.78)  | 0.26<br>(0.80)  | 0.54<br>(0.60)  | 0.39<br>(0.71)  | -0.09<br>(0.93) | 0.03<br>(0.97)  | -0.60<br>(0.56) |
| Left pars opercularis                  | 2.51<br>(0.11)  | 2.50<br>(0.12)  | 2.50<br>(0.11)  | 2.51<br>(0.12)  | 2.51<br>(0.11)  | 2.51<br>(0.11)  | 2.51<br>(0.10)  | 2.51<br>(0.12)  | 4.39  | 4.88  | 4.49  | 4.67  | 4.46  | 4.42  | 4     | 4.87  | 0.84<br>(0.42)  | -0.46<br>(0.65) | 0.26<br>(0.80)  | 0.49<br>(0.63)  | 0.41<br>(0.69)  | 0.18<br>(0.86)  | 0.14<br>(0.89)  |
| Left pars orbitalis                    | 2.62<br>(0.14)  | 2.59<br>(0.15)  | 2.62<br>(0.14)  | 2.59<br>(0.13)  | 2.61<br>(0.13)  | 2.58<br>(0.13)  | 2.61<br>(0.13)  | 2.61<br>(0.14)  | 5.34  | 5.61  | 5.51  | 4.92  | 4.95  | 5.16  | 5.15  | 5.29  | 1.24<br>(0.23)  | 1.47<br>(0.16)  | 1.14<br>(0.27)  | 1.39<br>(0.18)  | 1.81<br>(0.09)  | -0.31<br>(0.76) | 0.03<br>(0.97)  |
| Left pars triangularis                 | 2.39<br>(0.13)  | 2.38<br>(0.14)  | 2.39<br>(0.14)  | 2.40<br>(0.14)  | 2.39<br>(0.13)  | 2.39<br>(0.13)  | 2.40<br>(0.13)  | 2.41<br>(0.14)  | 5.44  | 5.75  | 5.9   | 5.75  | 5.3   | 5.49  | 5.45  | 5.87  | 0.85<br>(0.41)  | -1.08<br>(0.30) | -0.53<br>(0.61) | -0.51<br>(0.62) | -0.18<br>(0.86) | -1.05<br>(0.31) | -1.26<br>(0.23) |
| Left pericalcarine cortex              | 1.64<br>(0.12)  | 1.63<br>(0.12)  | 1.64<br>(0.12)  | 1.62<br>(0.12)  | 1.65<br>(0.12)  | 1.62<br>(0.12)  | 1.63<br>(0.14)  | 1.61<br>(0.13)  | 7.05  | 7.27  | 7.49  | 7.59  | 7.26  | 7.53  | 8.37  | 8.02  | 0.44<br>(0.66)  | 0.71<br>(0.49)  | 0.90<br>(0.38)  | 1.76<br>(0.10)  | 1.36<br>(0.19)  | 0.93<br>(0.37)  | 2.01<br>(0.06)  |
| Left postcentral gyrus                 | 2.12<br>(0.09)  | 2.11<br>(0.10)  | 2.11<br>(0.09)  | 2.11<br>(0.09)  | 2.12<br>(0.09)  | 2.12<br>(0.11)  | 2.11<br>(0.08)  | 2.12<br>(0.09)  | 4.34  | 4.64  | 4.04  | 4.33  | 4.22  | 5.01  | 3.9   | 4.45  | 0.70<br>(0.49)  | -0.14<br>(0.89) | 0.95<br>(0.36)  | 0.43<br>(0.68)  | 0.24<br>(0.81)  | -0.32<br>(0.76) | 0.32<br>(0.75)  |
| Left posterior cingulate cortex        | 2.52<br>(0.11)  | 2.51<br>(0.13)  | 2.53<br>(0.11)  | 2.52<br>(0.12)  | 2.53<br>(0.11)  | 2.52<br>(0.12)  | 2.52<br>(0.11)  | 2.52<br>(0.10)  | 4.37  | 5.00  | 4.49  | 4.82  | 4.37  | 4.77  | 4.44  | 3.8   | 0.34<br>(0.74)  | 0.34<br>(0.74)  | -0.26<br>(0.80) | 1.04<br>(0.32)  | 0.18<br>(0.86)  | 0.65<br>(0.52)  | 0.27<br>(0.79)  |
| Left precentral gyrus                  | 2.58<br>(0.11)  | 2.58<br>(0.09)  | 2.58<br>(0.10)  | 2.58<br>(0.09)  | 2.59<br>(0.09)  | 2.59<br>(0.10)  | 2.58<br>(0.09)  | 2.59<br>(0.07)  | 4.08  | 3.42  | 3.82  | 3.33  | 3.33  | 3.83  | 3.52  | 2.83  | -0.12<br>(0.90) | 0.26<br>(0.80)  | 0.71<br>(0.49)  | 0.37<br>(0.72)  | -0.26<br>(0.80) | -0.63<br>(0.54) | -0.71<br>(0.49) |
| Left precuneus                         | 2.51<br>(0.07)  | 2.50<br>(0.08)  | 2.51<br>(0.07)  | 2.51<br>(0.08)  | 2.52<br>(0.08)  | 2.50<br>(0.09)  | 2.51<br>(0.07)  | 2.51<br>(0.08)  | 2.96  | 3.09  | 2.76  | 3.24  | 3.16  | 3.58  | 2.93  | 3.02  | 0.68<br>(0.51)  | 0.04<br>(0.97)  | 0.20<br>(0.85)  | 1.79<br>(0.09)  | 0.88<br>(0.39)  | 0.55<br>(0.59)  | 0.20<br>(0.85)  |
| Left rostral anterior cingulate cortex | 2.88<br>(0.25)  | 2.85<br>(0.27)  | 2.89<br>(0.25)  | 2.86<br>(0.24)  | 2.87<br>(0.23)  | 2.88<br>(0.24)  | 2.86<br>(0.22)  | 2.86<br>(0.25)  | 8.65  | 9.37  | 8.71  | 8.53  | 8.11  | 8.43  | 7.61  | 8.66  | 0.90<br>(0.38)  | 1.11<br>(0.29)  | 0.69<br>(0.50)  | -0.40<br>(0.69) | 0.02<br>(0.98)  | 0.10<br>(0.92)  | 0.62<br>(0.55)  |
| Left rostral middle frontal gyrus      | 2.24<br>(0.09)  | 2.23<br>(0.11)  | 2.23<br>(0.09)  | 2.23<br>(0.10)  | 2.23<br>(0.08)  | 2.22<br>(0.10)  | 2.23<br>(0.09)  | 2.23<br>(0.11)  | 3.96  | 4.77  | 4.02  | 4.66  | 3.79  | 4.68  | 3.94  | 4.82  | 1.07<br>(0.30)  | 0.03<br>(0.97)  | 0.76<br>(0.46)  | 1.26<br>(0.23)  | 1.86<br>(0.08)  | 0.58<br>(0.57)  | 0.92<br>(0.37)  |
| Left superior frontal gyrus            | 2.62<br>(0.09)  | 2.58<br>(0.09)  | 2.62<br>(0.11)  | 2.59<br>(0.10)  | 2.61<br>(0.09)  | 2.58<br>(0.10)  | 2.62<br>(0.11)  | 2.60<br>(0.10)  | 3.43  | 3.66  | 4.35  | 3.84  | 3.43  | 3.95  | 4.21  | 3.68  | 2.15<br>(0.05)  | 1.90<br>(0.08)  | 2.06<br>(0.06)  | 2.13<br>(0.05)  | 2.31<br>(0.04)  | 1.18<br>(0.25)  | 1.29<br>(0.22)  |
| Left superior parietal cortex          | 2.23<br>(0.05)  | 2.23<br>(0.07)  | 2.23<br>(0.06)  | 2.23<br>(0.07)  | 2.23<br>(0.06)  | 2.23<br>(0.08)  | 2.24<br>(0.05)  | 2.23<br>(0.07)  | 2.16  | 3.11  | 2.46  | 3.06  | 2.57  | 3.42  | 2.33  | 3.03  | 0.57<br>(0.58)  | 0.83<br>(0.42)  | 1.18<br>(0.26)  | 0.72<br>(0.48)  | 0.66<br>(0.52)  | 0.95<br>(0.36)  | 0.75<br>(0.46)  |
| Left superior temporal gyrus           | 2.82<br>(0.12)  | 2.81<br>(0.15)  | 2.81<br>(0.12)  | 2.81<br>(0.15)  | 2.82<br>(0.11)  | 2.81<br>(0.15)  | 2.82<br>(0.12)  | 2.82<br>(0.15)  | 4.30  | 5.39  | 4.25  | 5.5   | 3.94  | 5.51  | 4.37  | 5.43  | 0.11<br>(0.92)  | -0.03<br>(0.97) | 0.17<br>(0.87)  | 0.44<br>(0.67)  | 0.39<br>(0.70)  | -0.32<br>(0.75) | -0.37<br>(0.72) |
| Left supramarginal gyrus               | 2.54<br>(0.10)  | 2.55<br>(0.09)  | 2.54<br>(0.08)  | 2.54<br>(0.09)  | 2.55<br>(0.09)  | 2.55<br>(0.09)  | 2.54<br>(0.09)  | 2.55<br>(0.08)  | 3.81  | 3.36  | 3.32  | 3.37  | 3.48  | 3.44  | 3.41  | 3.29  | -0.58<br>(0.57) | -0.44<br>(0.67) | -0.72<br>(0.48) | 0.13<br>(0.90)  | -0.66<br>(0.52) | -1.32<br>(0.21) | -1.15<br>(0.27) |
| Left frontal pole                      | 2.74<br>(0.28)  | 2.75<br>(0.22)  | 2.73<br>(0.23)  | 2.72<br>(0.21)  | 2.68<br>(0.20)  | 2.68<br>(0.20)  | 2.74<br>(0.26)  | 2.73<br>(0.20)  | 10.22 | 8.01  | 8.61  | 7.82  | 7.28  | 7.49  | 9.39  | 7.5   | -0.52<br>(0.61) | 0.31<br>(0.76)  | 0.50<br>(0.62)  | -0.09<br>(0.93) | 0.88<br>(0.39)  | 0.46<br>(0.65)  | 0.28<br>(0.79)  |
| Left temporal pole                     | 3.75<br>(0.23)  | 3.77<br>(0.22)  | 3.73<br>(0.24)  | 3.75<br>(0.23)  | 3.74<br>(0.22)  | 3.77<br>(0.25)  | 3.75<br>(0.20)  | 3.79<br>(0.22)  | 6.13  | 5.84  | 6.42  | 6.05  | 5.87  | 6.66  | 5.27  | 5.88  | -0.30<br>(0.77) | -0.49<br>(0.63) | 0.17<br>(0.87)  | -1.09<br>(0.29) | -0.39<br>(0.70) | -0.96<br>(0.35) | -0.77<br>(0.45) |
| Left transverse temporal gyrus         | 2.67<br>(0.15)  | 2.66<br>(0.15)  | 2.67<br>(0.16)  | 2.67<br>(0.15)  | 2.67<br>(0.13)  | 2.68<br>(0.14)  | 2.67<br>(0.15)  | 2.67<br>(0.15)  | 5.71  | 5.55  | 5.89  | 5.56  | 4.92  | 5.21  | 5.78  | 5.7   | 0.12<br>(0.91)  | -0.30<br>(0.77) | -0.39<br>(0.71) | -0.62<br>(0.54) | -0.58<br>(0.57) | 0.01<br>(0.99)  | -0.02<br>(0.98) |
| Left insula                            | 3.11<br>(0.13)  | 3.10<br>(0.10)  | 3.09<br>(0.12)  | 3.11<br>(0.11)  | 3.06<br>(0.16)  | 3.11<br>(0.13)  | 3.07<br>(0.13)  | 3.12<br>(0.10)  | 4.30  | 3.17  | 3.92  | 3.68  | 5.15  | 4.05  | 4.24  | 3.2   | 0.29<br>(0.78)  | -0.82<br>(0.43) | 0.06<br>(0.95)  | -1.42<br>(0.17) | -0.05<br>(0.96) | -1.67<br>(0.12) | -0.40<br>(0.70) |
| Right banks superior temporal sulcus   | 2.61<br>(0.15)  | 2.60<br>(0.15)  | 2.60<br>(0.14)  | 2.61<br>(0.14)  | 2.60<br>(0.15)  | 2.61<br>(0.15)  | 2.59<br>(0.16)  | 2.62<br>(0.14)  | 5.79  | 5.74  | 5.47  | 5.24  | 5.77  | 5.59  | 6.31  | 5.33  | 0.36<br>(0.72)  | -1.12<br>(0.28) | -0.28<br>(0.78) | -0.49<br>(0.63) | 0.07<br>(0.94)  | -1.62<br>(0.13) | -0.79<br>(0.44) |
| Right caudal anterior cingulate cortex | 2.60<br>(0.20)  | 2.54<br>(0.20)  | 2.60<br>(0.21)  | 2.55<br>(0.20)  | 2.57<br>(0.17)  | 2.56<br>(0.21)  | 2.58<br>(0.21)  | 2.53<br>(0.19)  | 7.68  | 7     |       |       |       |       |       |       |                 |                 |                 |                 |                 |                 |                 |

|                                                      |                   |                   |                   |                   |                   |                   |                   |                   |       |       |       |       |       |       |       |       |                 |                 |                 |                 |                 |                 |                 |
|------------------------------------------------------|-------------------|-------------------|-------------------|-------------------|-------------------|-------------------|-------------------|-------------------|-------|-------|-------|-------|-------|-------|-------|-------|-----------------|-----------------|-----------------|-----------------|-----------------|-----------------|-----------------|
| Right cuneus                                         | 2.01<br>(0.15)    | 1.99<br>(0.14)    | 2.00<br>(0.14)    | 1.99<br>(0.13)    | 2.01<br>(0.14)    | 1.99<br>(0.14)    | 2.01<br>(0.15)    | 1.99<br>(0.15)    | 7.70  | 7.01  | 7.21  | 6.71  | 6.97  | 6.94  | 7.36  | 7.32  | 1.41<br>(0.18)  | 1.32<br>(0.21)  | 1.73<br>(0.10)  | 2.18<br>(0.05)  | 1.48<br>(0.16)  | 3.00<br>(0.01)  | 1.84<br>(0.09)  |
| Right entorhinal cortex                              | 3.63<br>(0.37)    | 3.60<br>(0.30)    | 3.58<br>(0.36)    | 3.64<br>(0.30)    | 3.66<br>(0.34)    | 3.65<br>(0.26)    | 3.65<br>(0.39)    | 3.62<br>(0.29)    | 10.30 | 8.44  | 10.14 | 8.29  | 9.4   | 7.04  | 10.7  | 8.15  | 0.52<br>(0.61)  | -0.87<br>(0.40) | -0.11<br>(0.91) | 0.32<br>(0.75)  | -0.29<br>(0.78) | 0.45<br>(0.66)  | 0.15<br>(0.88)  |
| Right fusiform gyrus                                 | 2.84<br>(0.13)    | 2.84<br>(0.13)    | 2.84<br>(0.13)    | 2.84<br>(0.13)    | 2.84<br>(0.13)    | 2.84<br>(0.13)    | 2.84<br>(0.14)    | 2.85<br>(0.14)    | 4.55  | 4.72  | 4.6   | 4.44  | 4.71  | 4.69  | 4.91  | 5.05  | -0.23<br>(0.82) | -0.23<br>(0.82) | -0.42<br>(0.68) | 0.06<br>(0.95)  | -0.18<br>(0.86) | -0.76<br>(0.46) | -0.70<br>(0.49) |
| Right inferior parietal cortex                       | 2.43<br>(0.06)    | 2.43<br>(0.08)    | 2.42<br>(0.08)    | 2.43<br>(0.08)    | 2.42<br>(0.06)    | 2.43<br>(0.08)    | 2.42<br>(0.07)    | 2.44<br>(0.08)    | 2.66  | 3.09  | 3.11  | 3.1   | 2.66  | 3.18  | 3.07  | 3.35  | 0.08<br>(0.94)  | -0.76<br>(0.46) | 0.03<br>(0.98)  | -0.30<br>(0.77) | 0.32<br>(0.75)  | -1.69<br>(0.11) | -0.99<br>(0.34) |
| Right inferior temporal gyrus                        | 2.74<br>(0.12)    | 2.75<br>(0.12)    | 2.74<br>(0.11)    | 2.75<br>(0.10)    | 2.73<br>(0.11)    | 2.74<br>(0.12)    | 2.74<br>(0.12)    | 2.75<br>(0.12)    | 4.29  | 4.34  | 3.99  | 3.77  | 4     | 4.25  | 4.52  | 4.27  | -0.53<br>(0.61) | -0.36<br>(0.72) | -0.41<br>(0.68) | -0.45<br>(0.66) | 0.25<br>(0.80)  | -0.57<br>(0.58) | -0.51<br>(0.62) |
| Right isthmus cingulate cortex                       | 2.55<br>(0.16)    | 2.55<br>(0.16)    | 2.56<br>(0.14)    | 2.55<br>(0.14)    | 2.55<br>(0.15)    | 2.57<br>(0.16)    | 2.55<br>(0.14)    | 2.55<br>(0.17)    | 6.29  | 6.40  | 5.56  | 5.39  | 5.79  | 6.41  | 5.58  | 6.53  | -0.24<br>(0.81) | 0.66<br>(0.52)  | -0.08<br>(0.93) | -1.29<br>(0.22) | -1.05<br>(0.31) | 0.01<br>(0.99)  | -0.13<br>(0.90) |
| Right lateral occipital cortex                       | 2.29<br>(0.09)    | 2.29<br>(0.08)    | 2.28<br>(0.08)    | 2.29<br>(0.08)    | 2.28<br>(0.08)    | 2.30<br>(0.08)    | 2.28<br>(0.08)    | 2.30<br>(0.08)    | 3.75  | 3.65  | 3.55  | 3.35  | 3.44  | 3.46  | 3.59  | 3.51  | -0.49<br>(0.63) | -0.81<br>(0.43) | -0.62<br>(0.55) | -1.50<br>(0.16) | -0.98<br>(0.34) | -2.44<br>(0.03) | -1.96<br>(0.07) |
| Right lateral orbitofrontal cortex                   | 2.64<br>(0.11)    | 2.64<br>(0.13)    | 2.63<br>(0.09)    | 2.62<br>(0.14)    | 2.63<br>(0.10)    | 2.63<br>(0.15)    | 2.62<br>(0.12)    | 2.64<br>(0.10)    | 4.14  | 5.10  | 3.54  | 5.29  | 3.84  | 5.57  | 4.56  | 3.91  | 0.24<br>(0.81)  | 0.08<br>(0.93)  | 0.70<br>(0.49)  | -0.08<br>(0.94) | 0.35<br>(0.73)  | -1.00<br>(0.33) | 0.16<br>(0.87)  |
| Right lingual gyrus                                  | 2.13<br>(0.09)    | 2.11<br>(0.11)    | 2.12<br>(0.08)    | 2.10<br>(0.11)    | 2.12<br>(0.09)    | 2.11<br>(0.11)    | 2.12<br>(0.08)    | 2.11<br>(0.11)    | 4.07  | 5.29  | 3.89  | 5.04  | 4.2   | 5.05  | 3.91  | 5.2   | 1.10<br>(0.29)  | 1.14<br>(0.27)  | 2.02<br>(0.06)  | 1.03<br>(0.32)  | 1.45<br>(0.17)  | 1.14<br>(0.27)  | 1.50<br>(0.15)  |
| Right medial orbitofrontal cortex                    | 2.57<br>(0.08)    | 2.56<br>(0.10)    | 2.56<br>(0.06)    | 2.56<br>(0.09)    | 2.55<br>(0.09)    | 2.53<br>(0.11)    | 2.54<br>(0.09)    | 2.57<br>(0.08)    | 3.26  | 3.96  | 2.49  | 3.58  | 3.64  | 4.25  | 3.39  | 2.93  | 0.75<br>(0.46)  | 0.19<br>(0.85)  | 0.86<br>(0.40)  | 0.77<br>(0.45)  | 2.13<br>(0.05)  | -1.19<br>(0.25) | 0.55<br>(0.59)  |
| Right middle temporal gyrus                          | 2.86<br>(0.13)    | 2.87<br>(0.11)    | 2.86<br>(0.12)    | 2.87<br>(0.12)    | 2.84<br>(0.12)    | 2.85<br>(0.12)    | 2.83<br>(0.13)    | 2.86<br>(0.11)    | 4.61  | 3.84  | 4.33  | 4.11  | 4.27  | 4.23  | 4.51  | 3.8   | -0.60<br>(0.56) | -0.71<br>(0.49) | -0.80<br>(0.43) | -0.14<br>(0.89) | 0.58<br>(0.57)  | -2.00<br>(0.06) | -0.26<br>(0.80) |
| Right parahippocampal gyrus                          | 2.99<br>(0.15)    | 3.01<br>(0.14)    | 2.99<br>(0.15)    | 3.01<br>(0.14)    | 3.01<br>(0.13)    | 3.01<br>(0.14)    | 3.00<br>(0.14)    | 3.01<br>(0.16)    | 4.90  | 4.63  | 4.91  | 4.61  | 4.43  | 4.68  | 4.71  | 5.43  | -0.93<br>(0.37) | -1.59<br>(0.13) | -1.02<br>(0.32) | -0.24<br>(0.82) | -0.89<br>(0.39) | -0.04<br>(0.97) | -0.60<br>(0.56) |
| Right paracentral lobule                             | 2.49<br>(0.13)    | 2.47<br>(0.11)    | 2.48<br>(0.13)    | 2.47<br>(0.13)    | 2.49<br>(0.12)    | 2.48<br>(0.14)    | 2.48<br>(0.12)    | 2.47<br>(0.12)    | 5.42  | 4.62  | 5.09  | 5.11  | 4.96  | 5.59  | 4.91  | 5.01  | 0.80<br>(0.44)  | 0.63<br>(0.54)  | 0.97<br>(0.35)  | 1.23<br>(0.24)  | 0.73<br>(0.48)  | 0.58<br>(0.57)  | 0.86<br>(0.40)  |
| Right pars opercularis                               | 2.61<br>(0.12)    | 2.61<br>(0.13)    | 2.61<br>(0.11)    | 2.60<br>(0.12)    | 2.59<br>(0.12)    | 2.60<br>(0.13)    | 2.59<br>(0.12)    | 2.61<br>(0.12)    | 4.44  | 4.84  | 4.32  | 4.49  | 4.57  | 4.82  | 4.47  | 4.49  | 0.63<br>(0.54)  | 0.56<br>(0.58)  | 0.64<br>(0.53)  | -0.67<br>(0.52) | 1.08<br>(0.30)  | -0.89<br>(0.39) | 0.71<br>(0.49)  |
| Right pars orbitalis                                 | 2.67<br>(0.15)    | 2.68<br>(0.16)    | 2.67<br>(0.13)    | 2.67<br>(0.17)    | 2.66<br>(0.15)    | 2.66<br>(0.15)    | 2.66<br>(0.15)    | 2.69<br>(0.16)    | 5.71  | 6.08  | 5.03  | 6.47  | 5.59  | 5.82  | 5.82  | 5.97  | -0.71<br>(0.49) | -0.24<br>(0.81) | -0.49<br>(0.63) | 0.13<br>(0.90)  | 0.42<br>(0.68)  | -1.45<br>(0.17) | -1.56<br>(0.14) |
| Right pars triangularis                              | 2.49<br>(0.11)    | 2.48<br>(0.11)    | 2.49<br>(0.10)    | 2.49<br>(0.11)    | 2.48<br>(0.10)    | 2.49<br>(0.11)    | 2.49<br>(0.11)    | 2.50<br>(0.11)    | 4.26  | 4.25  | 4.21  | 4.44  | 4.01  | 4.53  | 4.22  | 4.37  | 0.46<br>(0.65)  | -0.09<br>(0.93) | 0.08<br>(0.94)  | -0.23<br>(0.82) | 0.38<br>(0.71)  | -0.54<br>(0.60) | -0.20<br>(0.85) |
| Right pericalcarine cortex                           | 1.67<br>(0.15)    | 1.65<br>(0.16)    | 1.67<br>(0.15)    | 1.65<br>(0.17)    | 1.68<br>(0.15)    | 1.66<br>(0.16)    | 1.68<br>(0.16)    | 1.66<br>(0.16)    | 8.99  | 9.42  | 9.01  | 10.1  | 9.19  | 9.52  | 9.51  | 9.84  | 1.12<br>(0.28)  | 1.04<br>(0.31)  | 0.86<br>(0.41)  | 1.11<br>(0.28)  | 0.75<br>(0.47)  | 1.03<br>(0.32)  | 0.44<br>(0.66)  |
| Right postcentral gyrus                              | 2.10<br>(0.08)    | 2.10<br>(0.09)    | 2.09<br>(0.09)    | 2.10<br>(0.10)    | 2.09<br>(0.09)    | 2.10<br>(0.10)    | 2.09<br>(0.09)    | 2.10<br>(0.09)    | 3.97  | 4.39  | 4.28  | 4.63  | 4.07  | 4.58  | 4.46  | 4.44  | -0.17<br>(0.86) | -1.77<br>(0.10) | -0.76<br>(0.46) | -1.17<br>(0.26) | -0.55<br>(0.59) | -0.90<br>(0.38) | 0.01<br>(0.99)  |
| Right posterior cingulate cortex                     | 2.46<br>(0.12)    | 2.46<br>(0.15)    | 2.47<br>(0.12)    | 2.47<br>(0.13)    | 2.46<br>(0.11)    | 2.48<br>(0.14)    | 2.46<br>(0.11)    | 2.47<br>(0.14)    | 4.70  | 6.18  | 4.69  | 5.43  | 4.48  | 5.5   | 4.66  | 5.48  | -0.23<br>(0.82) | -0.08<br>(0.93) | -0.93<br>(0.37) | -0.69<br>(0.50) | -1.40<br>(0.18) | -0.46<br>(0.65) | -0.71<br>(0.49) |
| Right precentral gyrus                               | 2.59<br>(0.11)    | 2.59<br>(0.10)    | 2.59<br>(0.09)    | 2.59<br>(0.09)    | 2.58<br>(0.09)    | 2.58<br>(0.10)    | 2.57<br>(0.10)    | 2.59<br>(0.09)    | 4.15  | 3.69  | 3.61  | 3.56  | 3.55  | 4.02  | 3.92  | 3.56  | 0.14<br>(0.89)  | 0.16<br>(0.87)  | 0.11<br>(0.91)  | -0.11<br>(0.92) | 0.38<br>(0.71)  | -0.75<br>(0.47) | 0.29<br>(0.77)  |
| Right precuneus                                      | 2.49<br>(0.08)    | 2.49<br>(0.09)    | 2.47<br>(0.07)    | 2.49<br>(0.09)    | 2.48<br>(0.07)    | 2.48<br>(0.09)    | 2.48<br>(0.07)    | 2.49<br>(0.09)    | 3.11  | 3.81  | 2.64  | 3.79  | 2.91  | 3.64  | 2.71  | 3.72  | -0.09<br>(0.93) | -1.41<br>(0.18) | -0.29<br>(0.78) | -0.57<br>(0.58) | 0.17<br>(0.87)  | -0.62<br>(0.54) | 0.07<br>(0.94)  |
| Right rostral anterior cingulate cortex              | 2.98<br>(0.15)    | 2.98<br>(0.14)    | 2.97<br>(0.15)    | 2.97<br>(0.14)    | 2.99<br>(0.14)    | 2.98<br>(0.14)    | 2.95<br>(0.16)    | 2.96<br>(0.14)    | 5.06  | 4.81  | 5     | 4.84  | 4.61  | 4.86  | 5.53  | 4.73  | 0.27<br>(0.79)  | -0.09<br>(0.93) | 0.50<br>(0.62)  | 0.35<br>(0.73)  | 0.14<br>(0.89)  | -0.44<br>(0.67) | 0.77<br>(0.45)  |
| Right rostral middle frontal gyrus                   | 2.36<br>(0.05)    | 2.34<br>(0.07)    | 2.36<br>(0.05)    | 2.34<br>(0.07)    | 2.35<br>(0.05)    | 2.33<br>(0.06)    | 2.35<br>(0.06)    | 2.34<br>(0.07)    | 2.29  | 3.21  | 2.06  | 3.18  | 2.02  | 2.65  | 2.48  | 2.86  | 1.06<br>(0.30)  | 1.23<br>(0.24)  | 1.07<br>(0.30)  | 1.16<br>(0.27)  | 1.77<br>(0.10)  | 0.51<br>(0.62)  | 1.11<br>(0.28)  |
| Right superior frontal gyrus                         | 2.72<br>(0.09)    | 2.70<br>(0.11)    | 2.73<br>(0.09)    | 2.70<br>(0.11)    | 2.71<br>(0.09)    | 2.68<br>(0.12)    | 2.71<br>(0.11)    | 2.70<br>(0.10)    | 3.43  | 3.93  | 3.2   | 4.06  | 3.38  | 4.52  | 3.88  | 3.82  | 1.25<br>(0.23)  | 1.30<br>(0.21)  | 1.12<br>(0.28)  | 1.92<br>(0.07)  | 1.97<br>(0.07)  | 0.31<br>(0.76)  | 1.15<br>(0.27)  |
| Right superior parietal cortex                       | 2.20<br>(0.07)    | 2.19<br>(0.08)    | 2.19<br>(0.07)    | 2.19<br>(0.09)    | 2.19<br>(0.07)    | 2.19<br>(0.09)    | 2.19<br>(0.06)    | 2.20<br>(0.09)    | 3.32  | 3.72  | 3.33  | 4.04  | 3.23  | 4.13  | 2.97  | 3.92  | 0.42<br>(0.68)  | -0.48<br>(0.64) | 0.39<br>(0.70)  | 0.61<br>(0.55)  | 1.41<br>(0.18)  | -1.16<br>(0.27) | 0.05<br>(0.96)  |
| Right superior temporal gyrus                        | 2.95<br>(0.12)    | 2.93<br>(0.15)    | 2.94<br>(0.12)    | 2.93<br>(0.13)    | 2.93<br>(0.13)    | 2.92<br>(0.14)    | 2.93<br>(0.14)    | 2.94<br>(0.15)    | 4.14  | 5.16  | 4.12  | 4.54  | 4.35  | 4.71  | 4.78  | 5.08  | 1.12<br>(0.28)  | 0.82<br>(0.43)  | 1.50<br>(0.15)  | 1.29<br>(0.22)  | 1.90<br>(0.08)  | -0.44<br>(0.67) | 0.49<br>(0.63)  |
| Right supramarginal gyrus                            | 2.51<br>(0.08)    | 2.50<br>(0.08)    | 2.50<br>(0.08)    | 2.50<br>(0.09)    | 2.50<br>(0.08)    | 2.49<br>(0.09)    | 2.49<br>(0.08)    | 2.51<br>(0.09)    | 3.12  | 3.32  | 3.07  | 3.61  | 3.22  | 3.56  | 3.21  | 3.48  | 0.55<br>(0.59)  | -0.44<br>(0.67) | 0.28<br>(0.78)  | 0.63<br>(0.54)  | 1.03<br>(0.32)  | -1.41<br>(0.18) | -0.33<br>(0.75) |
| Right frontal pole                                   | 2.66<br>(0.13)    | 2.72<br>(0.16)    | 2.68<br>(0.14)    | 2.69<br>(0.15)    | 2.60<br>(0.16)    | 2.62<br>(0.18)    | 2.67<br>(0.14)    | 2.68<br>(0.16)    | 4.70  | 6.02  | 5.23  | 5.69  | 6.08  | 7.04  | 5.42  | 6.06  | -1.50<br>(0.15) | -0.35<br>(0.73) | -0.71<br>(0.49) | -0.55<br>(0.59) | 0.86<br>(0.40)  | -0.28<br>(0.79) | -0.55<br>(0.59) |
| Right temporal pole                                  | 3.83<br>(0.28)    | 3.91<br>(0.19)    | 3.81<br>(0.31)    | 3.91<br>(0.20)    | 3.82<br>(0.30)    | 3.89<br>(0.18)    | 3.83<br>(0.31)    | 3.93<br>(0.18)    | 7.26  | 4.77  | 8.06  | 5.05  | 7.81  | 4.7   | 8.08  | 4.65  | -1.70<br>(0.11) | -1.80<br>(0.09) | -1.41<br>(0.18) | -1.18<br>(0.25) | -1.04<br>(0.32) | -1.60<br>(0.13) | -1.66<br>(0.12) |
| Right transverse temporal gyrus                      | 2.74<br>(0.21)    | 2.72<br>(0.22)    | 2.73<br>(0.20)    | 2.70<br>(0.22)    | 2.75<br>(0.21)    | 2.70<br>(0.22)    | 2.74<br>(0.20)    | 2.72<br>(0.22)    | 7.65  | 7.96  | 7.48  | 7.97  | 7.7   | 8.22  | 7.31  | 8.14  | 0.79<br>(0.44)  | 1.21<br>(0.25)  | 1.56<br>(0.14)  | 1.74<br>(0.10)  | 1.49<br>(0.16)  | 1.07<br>(0.30)  | 1.02<br>(0.32)  |
| Right insula                                         | 3.14<br>(0.16)    | 3.17<br>(0.12)    | 3.16<br>(0.14)    | 3.18<br>(0.12)    | 3.13<br>(0.15)    | 3.18<br>(0.10)    | 3.14<br>(0.09)    | 3.11<br>(0.17)    | 4.97  | 3.77  | 4.43  | 3.72  | 4.65  | 3.01  | 2.77  | 5.52  | -0.79<br>(0.44) | -0.74<br>(0.47) | -1.29<br>(0.22) | -1.59<br>(0.13) | -1.11<br>(0.29) | 0.81<br>(0.43)  | 0.89<br>(0.39)  |
| <b>Global brain measures</b>                         |                   |                   |                   |                   |                   |                   |                   |                   |       |       |       |       |       |       |       |       |                 |                 |                 |                 |                 |                 |                 |
| Left total cortical volume (ml)                      | 250.57<br>(21.45) | 249.88<br>(22.55) | 250.33<br>(21.43) | 249.79<br>(21.86) | 250.59<br>(22.81) | 249.56<br>(23.16) | 250.78<br>(21.99) | 250.65<br>(22.36) | 8.56  | 9.02  | 8.56  | 8.75  | 9.1   | 9.28  | 8.77  | 8.92  | 0.70<br>(0.50)  | 0.67<br>(0.51)  | 0.86<br>(0.40)  | 1.11<br>(0.29)  | 1.04<br>(0.31)  | 0.14<br>(0.89)  | -0.09<br>(0.93) |
| Right total cortical volume (ml)                     | 252.63<br>(22.32) | 251.89<br>(22.92) | 252.52<br>(22.69) | 251.83<br>(21.53) | 251.69<br>(22.47) | 250.94<br>(22.40) | 251.84<br>(21.50) | 252.12<br>(21.96) | 8.83  | 9.10  | 8.98  | 8.55  | 8.93  | 8.93  | 8.54  | 8.71  | 0.57<br>(0.58)  | 0.65<br>(0.53)  | 0.70<br>(0.50)  | 0.72<br>(0.48)  | 1.43<br>(0.17)  | -0.25<br>(0.81) | 0.42<br>(0.68)  |
| Left total cortical white matter (ml)                | 227.42<br>(34.18) | 227.83<br>(35.14) | 227.87<br>(34.01) | 228.27<br>(34.94) | 227.63<br>(34.79) | 228.16<br>(35.76) | 228.08<br>(34.45) | 228.53<br>(35.60) | 15.03 | 15.42 | 14.92 | 15.31 | 15.29 | 15.67 | 15.1  | 15.58 | -0.62<br>(0.54) | -1.03<br>(0.32) | -1.78<br>(0.09) | -1.02<br>(0.32) | -1.08<br>(0.30) | -1.08<br>(0.30) | -1.89<br>(0.08) |
| Right total cortical white matter (ml)               | 228.37<br>(35.52) | 228.82<br>(36.23) | 228.69<br>(35.53) | 229.20<br>(35.77) | 228.07<br>(35.46) | 228.92<br>(36.03) | 228.44<br>(35.33) | 229.19<br>(36.30) | 15.56 | 15.83 | 15.54 | 15.61 | 15.55 | 15.74 | 15.47 | 15.84 | -0.65<br>(0.52) | -0.85<br>(0.41) | -1.25<br>(0.23) | -1.44<br>(0.17) | -0.93<br>(0.37) | -1.30<br>(0.21) | -1.19<br>(0.25) |
| Left total cortical surface area (cm <sup>2</sup> )  | 894.23<br>(95.31) | 893.60<br>(95.58) | 894.59<br>(95.92) | 894.44<br>(94.55) | 895.06<br>(97.01) | 893.83<br>(95.83) | 896.96<br>(96.45) | 895.53<br>(95.71) | 10.66 | 10.70 | 10.72 | 10.57 | 10.84 | 10.72 | 10.75 | 10.69 | 0.43<br>(0.67)  | 0.09<br>(0.93)  | -0.11<br>(0.91) | 0.81<br>(0.43)  | 0.26<br>(0.80)  | 0.89<br>(0.39)  | -0.80<br>(0.44) |
| Right total cortical surface area (cm <sup>2</sup> ) | 895.33<br>(96.45) | 894.90<br>(97.05) | 895.73<br>(96.95) | 895.28<br>(95.81) | 894.40<br>(97.20) | 894.00<br>(96.15) | 895.88<br>(95.86) | 896.15<br>(96.22) | 10.77 | 10.84 | 10.82 |       |       |       |       |       |                 |                 |                 |                 |                 |                 |                 |



|                                            |                     |                     |                     |                     |                     |                     |                     |                     |       |       |       |       |       |       |       |       |                 |                 |                 |                 |                |                 |                 |
|--------------------------------------------|---------------------|---------------------|---------------------|---------------------|---------------------|---------------------|---------------------|---------------------|-------|-------|-------|-------|-------|-------|-------|-------|-----------------|-----------------|-----------------|-----------------|----------------|-----------------|-----------------|
| Left cerebellar white matter (ml)          | 15.25<br>(1.48)     | 15.15<br>(1.66)     | 15.14<br>(1.59)     | 15.00<br>(1.57)     | 15.21<br>(1.59)     | 14.98<br>(1.53)     | 15.17<br>(1.68)     | 15.05<br>(1.65)     | 9.73  | 10.98 | 10.49 | 10.45 | 10.47 | 10.22 | 11.08 | 10.96 | 0.58<br>(0.57)  | 0.80<br>(0.43)  | 1.41<br>(0.18)  | 1.37<br>(0.19)  | 1.68<br>(0.11) | 0.70<br>(0.49)  | 1.30<br>(0.21)  |
| Right cerebellar white matter (ml)         | 14.48<br>(1.58)     | 14.42<br>(1.85)     | 14.24<br>(1.64)     | 14.39<br>(1.65)     | 14.38<br>(1.62)     | 14.39<br>(1.69)     | 14.37<br>(1.55)     | 14.34<br>(1.74)     | 10.94 | 12.82 | 11.5  | 11.48 | 11.28 | 11.78 | 10.79 | 12.11 | 0.34<br>(0.74)  | -1.17<br>(0.26) | 0.73<br>(0.48)  | -0.11<br>(0.92) | 0.70<br>(0.50) | 0.21<br>(0.84)  | 1.01<br>(0.33)  |
| Left cerebellar gray matter (ml)           | 55.82<br>(5.28)     | 55.82<br>(5.20)     | 55.83<br>(5.30)     | 55.83<br>(5.22)     | 55.75<br>(5.32)     | 55.79<br>(5.29)     | 55.82<br>(5.23)     | 56.00<br>(5.24)     | 9.46  | 9.32  | 9.49  | 9.36  | 9.53  | 9.48  | 9.37  | 9.36  | 0.01<br>(0.99)  | -0.02<br>(0.98) | -0.04<br>(0.97) | -0.19<br>(0.85) | 0.17<br>(0.87) | -0.94<br>(0.36) | -0.94<br>(0.36) |
| Right cerebellar gray matter (ml)          | 54.79<br>(5.44)     | 54.78<br>(5.44)     | 54.83<br>(5.50)     | 54.76<br>(5.47)     | 54.61<br>(5.49)     | 54.68<br>(5.44)     | 54.93<br>(5.41)     | 54.96<br>(5.39)     | 9.92  | 9.93  | 10.03 | 9.98  | 10.06 | 9.96  | 9.85  | 9.81  | 0.12<br>(0.91)  | 0.37<br>(0.72)  | 0.23<br>(0.82)  | -0.45<br>(0.66) | 0.67<br>(0.51) | -0.21<br>(0.84) | -1.18<br>(0.26) |
| Intracranial volume (ml)                   | 1484.47<br>(258.06) | 1494.06<br>(261.63) | 1497.06<br>(242.06) | 1495.98<br>(254.54) | 1437.35<br>(264.02) | 1434.48<br>(284.46) | 1516.68<br>(233.88) | 1516.81<br>(237.82) | 17.38 | 17.51 | 16.17 | 17.01 | 18.37 | 19.83 | 15.42 | 15.68 | -1.31<br>(0.21) | 0.10<br>(0.92)  | -1.42<br>(0.18) | 0.22<br>(0.83)  | 2.66<br>(0.02) | -0.03<br>(0.97) | -2.42<br>(0.03) |
| Total brain volume without ventricles (ml) | 1158.90<br>(124.07) | 1158.06<br>(125.74) | 1158.88<br>(123.80) | 1158.36<br>(123.73) | 1157.40<br>(126.10) | 1156.51<br>(127.45) | 1158.77<br>(123.46) | 1160.14<br>(125.34) | 10.71 | 10.86 | 10.68 | 10.68 | 10.89 | 11.02 | 10.65 | 10.8  | 0.38<br>(0.71)  | 0.31<br>(0.76)  | 0.27<br>(0.79)  | 0.45<br>(0.66)  | 0.99<br>(0.34) | -0.80<br>(0.44) | -0.57<br>(0.58) |

Abbreviations: SD=standard deviation; Orig = Original scan; FS df =FreeSurfer defacing; FSL df =FSL defacing; FM = Face Masking; Suffix 1 and 2 indicate first and second scan respectively, i.e. test-retest; t=t-statistic; p=p-value.

**Table S7. Effects of de-identification on test-retest reliability in young adults: Average signed and absolute percentage differences**

| Brain metric                          | Signed PD in % (SD) |                     |                      |                         |                       |                 |                   | Absolute PD (%) (SD) |                     |                      |                         |                       |                 |                   |
|---------------------------------------|---------------------|---------------------|----------------------|-------------------------|-----------------------|-----------------|-------------------|----------------------|---------------------|----------------------|-------------------------|-----------------------|-----------------|-------------------|
|                                       | Orig1<br>-<br>Orig2 | Orig1<br>-<br>Orig2 | Orig1<br>-<br>FS df2 | FSL df1<br>-<br>FSL df2 | Orig1<br>-<br>FSL df2 | FM1<br>-<br>FM2 | Orig1<br>-<br>FM2 | Orig1<br>-<br>Orig2  | Orig1<br>-<br>Orig2 | Orig1<br>-<br>FS df2 | FSL df1<br>-<br>FSL df2 | Orig1<br>-<br>FSL df2 | FM1<br>-<br>FM2 | Orig1<br>-<br>FM2 |
| <b>Subcortical volume (ml)</b>        |                     |                     |                      |                         |                       |                 |                   |                      |                     |                      |                         |                       |                 |                   |
| Left thalamus                         | 0.30 (3.25)         | -0.62 (3.54)        | -0.97 (3.39)         | -1.26 (3.37)            | -1.13 (2.29)          | -0.20 (3.09)    | -0.03 (2.07)      | 2.44 (2.07)          | 2.48 (2.53)         | 2.90 (1.87)          | 2.52 (2.50)             | 2.05 (1.46)           | 1.97 (2.33)     | 1.68 (1.13)       |
| Left caudatus                         | -1.29 (2.76)        | -0.98 (1.92)        | -1.20 (2.35)         | -0.27 (1.86)            | -0.57 (2.19)          | -0.57 (1.63)    | -1.36 (2.09)      | 2.01 (2.25)          | 1.49 (1.53)         | 1.79 (1.91)          | 1.27 (1.35)             | 1.62 (1.53)           | 1.21 (1.19)     | 1.89 (1.59)       |
| Left putamen                          | -0.03 (4.02)        | -0.71 (3.13)        | -0.18 (4.44)         | -0.48 (3.47)            | -0.24 (4.42)          | -1.02 (2.42)    | -0.61 (4.29)      | 2.94 (2.64)          | 2.53 (1.87)         | 3.17 (3.00)          | 2.46 (2.42)             | 3.18 (2.96)           | 1.89 (1.77)     | 3.11 (2.91)       |
| Left pallidum                         | 0.20 (5.49)         | -2.04 (5.86)        | 0.09 (5.39)          | -1.30 (4.12)            | -0.19 (4.66)          | -0.93 (6.75)    | -0.45 (6.45)      | 4.12 (3.47)          | 4.69 (3.91)         | 4.17 (3.24)          | 3.04 (2.98)             | 3.51 (2.93)           | 5.05 (4.39)     | 5.19 (3.62)       |
| Left hippocampus                      | 0.57 (1.85)         | -0.10 (2.80)        | 0.13 (2.14)          | 0.06 (2.37)             | -0.07 (2.27)          | 0.60 (2.53)     | 1.13 (2.38)       | 1.40 (1.29)          | 2.15 (1.71)         | 1.76 (1.15)          | 1.94 (1.27)             | 1.52 (1.64)           | 1.98 (1.60)     | 2.14 (1.46)       |
| Left amygdala                         | 0.43 (5.16)         | -0.99 (5.75)        | 0.00 (4.86)          | -0.79 (8.56)            | -0.24 (7.23)          | -0.22 (6.71)    | -0.65 (6.88)      | 4.02 (3.10)          | 4.50 (3.53)         | 4.01 (2.55)          | 6.69 (5.12)             | 5.03 (5.04)           | 5.44 (3.66)     | 5.18 (4.39)       |
| Left accumbens                        | 4.38 (11.00)        | 0.78 (6.45)         | 2.46 (9.96)          | -0.59 (9.85)            | 1.01 (8.58)           | 0.15 (12.90)    | 4.31 (11.52)      | 9.02 (7.40)          | 5.06 (3.86)         | 7.84 (6.32)          | 8.83 (3.79)             | 6.93 (4.83)           | 9.90 (7.87)     | 9.37 (7.67)       |
| Right thalamus                        | -1.23 (2.85)        | -1.62 (3.67)        | -1.88 (3.31)         | -1.90 (3.03)            | -1.61 (3.15)          | -1.82 (3.36)    | -1.57 (3.42)      | 2.37 (1.94)          | 2.84 (2.77)         | 3.08 (2.14)          | 2.98 (1.89)             | 3.11 (1.55)           | 3.21 (1.95)     | 3.27 (1.70)       |
| Right caudatus                        | -0.80 (2.10)        | -0.33 (2.92)        | -1.08 (2.47)         | -0.90 (2.17)            | -1.01 (1.47)          | -1.39 (1.97)    | -1.09 (1.86)      | 1.76 (1.32)          | 2.16 (1.91)         | 2.13 (1.58)          | 1.66 (1.63)             | 1.47 (0.97)           | 1.89 (1.47)     | 1.62 (1.39)       |
| Right putamen                         | -0.30 (1.69)        | -0.32 (1.86)        | -0.70 (1.82)         | -0.85 (1.95)            | -0.54 (1.91)          | -0.61 (1.58)    | -1.08 (1.61)      | 1.34 (1.02)          | 1.52 (1.05)         | 1.46 (1.25)          | 1.57 (1.39)             | 1.48 (1.28)           | 1.18 (1.18)     | 1.52 (1.16)       |
| Right pallidum                        | -0.35 (3.91)        | -0.28 (4.25)        | 0.25 (4.78)          | -0.28 (4.16)            | -0.21 (4.52)          | 0.91 (5.59)     | -0.02 (5.88)      | 2.80 (2.66)          | 3.28 (2.59)         | 3.62 (3.00)          | 3.01 (2.77)             | 3.72 (2.40)           | 4.63 (3.03)     | 4.71 (3.31)       |
| Right hippocampus                     | 0.96 (1.69)         | -0.17 (3.04)        | 0.14 (2.25)          | -0.13 (2.50)            | 0.33 (2.24)           | 0.35 (3.18)     | 0.48 (2.71)       | 1.58 (1.09)          | 2.47 (1.67)         | 1.74 (1.36)          | 1.85 (1.62)             | 1.74 (1.39)           | 2.50 (1.90)     | 2.19 (1.57)       |
| Right amygdala                        | -1.53 (6.49)        | 1.21 (6.55)         | -0.71 (6.30)         | 2.19 (7.68)             | 0.31 (6.72)           | 1.85 (8.35)     | -1.13 (7.13)      | 4.20 (5.08)          | 4.99 (4.23)         | 4.42 (4.41)          | 6.29 (4.68)             | 4.70 (4.66)           | 5.93 (5.99)     | 4.51 (5.52)       |
| Right accumbens                       | 1.08 (10.27)        | 2.42 (9.15)         | 2.39 (9.56)          | 1.07 (6.05)             | 1.32 (7.72)           | 1.39 (6.94)     | 1.15 (8.81)       | 7.94 (6.28)          | 7.79 (5.02)         | 8.32 (4.87)          | 5.00 (3.35)             | 6.45 (4.14)           | 5.93 (3.57)     | 7.10 (5.01)       |
| <b>Ventricular volume (ml)</b>        |                     |                     |                      |                         |                       |                 |                   |                      |                     |                      |                         |                       |                 |                   |
| Third ventricle                       | 1.94 (5.38)         | 1.92 (5.20)         | 1.38 (4.96)          | 1.82 (5.67)             | 0.66 (5.91)           | 2.52 (5.97)     | 2.14 (5.09)       | 3.76 (4.23)          | 4.19 (3.51)         | 3.78 (3.38)          | 4.10 (4.21)             | 4.23 (4.04)           | 4.53 (4.54)     | 3.60 (4.12)       |
| Left lateral ventricle                | 1.00 (3.20)         | 0.57 (2.64)         | 0.53 (3.06)          | 0.65 (2.57)             | 1.05 (2.93)           | 0.74 (2.96)     | 0.71 (3.05)       | 2.36 (2.31)          | 1.93 (1.83)         | 2.13 (2.20)          | 1.88 (1.81)             | 2.27 (2.06)           | 2.29 (1.94)     | 2.25 (2.11)       |
| Left inferior lateral ventricle       | 5.03 (10.82)        | 6.02 (13.71)        | 7.03 (14.09)         | -0.97 (11.97)           | 4.76 (15.22)          | 4.45 (17.34)    | 4.19 (16.05)      | 9.57 (6.81)          | 10.15 (10.81)       | 11.14 (10.91)        | 9.70 (6.63)             | 9.58 (12.56)          | 10.26 (14.48)   | 9.83 (13.17)      |
| Right lateral ventricle               | 1.26 (2.69)         | 1.73 (2.97)         | 1.31 (2.90)          | 1.17 (2.72)             | 0.80 (2.76)           | 1.20 (2.73)     | 1.23 (2.63)       | 2.20 (1.94)          | 2.71 (2.05)         | 2.53 (1.85)          | 2.01 (2.13)             | 2.15 (1.84)           | 2.29 (1.84)     | 2.29 (1.71)       |
| Right inferior lateral ventricle      | 3.28 (12.86)        | 3.27 (12.89)        | 2.77 (9.58)          | -0.67 (13.29)           | -1.08 (14.63)         | 3.34 (17.13)    | 0.00 (10.00)      | 9.36 (9.13)          | 7.38 (10.93)        | 7.56 (6.23)          | 9.59 (8.89)             | 9.78 (10.64)          | 10.10 (14.02)   | 7.39 (6.47)       |
| <b>Local cortical volume (ml)</b>     |                     |                     |                      |                         |                       |                 |                   |                      |                     |                      |                         |                       |                 |                   |
| Left banks superior temporal sulcus   | -0.65 (6.27)        | 0.82 (4.42)         | 0.02 (4.92)          | -1.72 (4.44)            | -2.29 (5.40)          | 1.02 (4.94)     | -1.02 (5.10)      | 4.87 (3.80)          | 3.85 (2.10)         | 3.95 (2.76)          | 3.54 (3.09)             | 4.49 (3.63)           | 3.86 (3.10)     | 4.26 (2.78)       |
| Left caudal anterior cingulate cortex | -3.23 (5.45)        | -1.61 (5.95)        | -2.77 (5.80)         | -2.04 (6.59)            | -1.96 (6.44)          | -0.45 (4.95)    | -0.61 (5.74)      | 5.11 (3.60)          | 4.50 (4.07)         | 4.74 (4.23)          | 4.92 (4.69)             | 4.81 (4.57)           | 3.74 (3.14)     | 3.80 (4.24)       |
| Left caudal middle frontal gyrus      | -0.32 (3.05)        | -1.01 (3.42)        | -1.46 (3.95)         | -1.17 (3.25)            | -1.08 (3.67)          | -0.69 (2.41)    | -0.39 (3.39)      | 2.54 (1.60)          | 2.69 (2.26)         | 3.40 (2.35)          | 2.76 (1.98)             | 3.28 (1.81)           | 1.94 (1.51)     | 2.76 (1.88)       |
| Left cuneus                           | -0.25 (4.00)        | 0.23 (3.65)         | -0.44 (3.66)         | 0.11 (3.21)             | 0.14 (3.02)           | -0.05 (3.06)    | 0.09 (3.40)       | 3.24 (2.21)          | 3.10 (1.78)         | 3.00 (2.00)          | 2.60 (1.76)             | 2.61 (1.38)           | 2.53 (1.58)     | 2.57 (2.13)       |
| Left entorhinal cortex                | 1.23 (10.24)        | 0.61 (10.73)        | -0.82 (10.57)        | -1.28 (12.85)           | -0.55 (11.64)         | -1.83 (10.33)   | -1.48 (11.62)     | 8.85 (4.78)          | 8.39 (6.35)         | 8.34 (6.19)          | 10.57 (6.91)            | 9.92 (5.54)           | 8.37 (5.97)     | 9.93 (5.69)       |
| Left fusiform gyrus                   | 0.95 (2.67)         | 1.44 (3.23)         | 0.88 (3.58)          | 1.44 (3.62)             | 0.59 (3.45)           | 1.89 (3.59)     | 1.40 (3.07)       | 2.11 (1.82)          | 2.78 (2.11)         | 2.84 (2.25)          | 3.27 (1.98)             | 2.94 (1.74)           | 2.89 (2.79)     | 2.40 (2.31)       |
| Left inferior parietal cortex         | -0.07 (2.51)        | 0.18 (2.35)         | -0.26 (1.99)         | 0.11 (3.00)             | 0.14 (2.64)           | -0.30 (2.54)    | 0.18 (1.95)       | 1.95 (1.50)          | 1.80 (1.44)         | 1.66 (1.06)          | 2.37 (1.75)             | 2.12 (1.47)           | 1.96 (1.56)     | 1.44 (1.28)       |
| Left inferior temporal gyrus          | -0.49 (4.02)        | 0.45 (3.51)         | -0.01 (3.34)         | -0.14 (3.78)            | -0.02 (3.95)          | 0.60 (3.28)     | 0.05 (3.29)       | 3.30 (2.19)          | 2.24 (2.68)         | 2.57 (2.02)          | 3.05 (2.09)             | 2.80 (2.69)           | 2.93 (1.40)     | 2.60 (1.90)       |
| Left isthmus cingulate cortex         | 0.99 (4.27)         | -0.25 (2.63)        | 0.45 (3.58)          | -0.03 (3.92)            | 0.98 (4.44)           | -0.10 (4.56)    | 0.85 (5.13)       | 3.55 (2.41)          | 2.21 (1.33)         | 2.60 (2.41)          | 2.71 (2.75)             | 2.82 (3.50)           | 3.05 (3.31)     | 3.85 (3.36)       |
| Left lateral occipital cortex         | -0.29 (1.68)        | -0.64 (2.44)        | -0.53 (1.61)         | -0.89 (2.88)            | -0.83 (2.04)          | 0.43 (1.67)     | 0.22 (1.76)       | 1.20 (1.18)          | 2.08 (1.33)         | 1.39 (0.91)          | 2.42 (1.70)             | 1.66 (1.39)           | 1.40 (0.94)     | 1.43 (0.98)       |
| Left lateral orbitofrontal cortex     | -0.57 (3.20)        | -0.29 (3.06)        | 0.16 (3.00)          | -0.27 (3.55)            | -0.18 (3.28)          | 0.03 (3.89)     | 0.42 (4.10)       | 2.26 (2.26)          | 2.16 (2.12)         | 2.22 (1.95)          | 2.39 (2.57)             | 2.22 (2.35)           | 2.74 (2.67)     | 2.74 (3.00)       |
| Left lingual gyrus                    | -0.77 (2.73)        | -0.72 (3.08)        | -0.64 (3.23)         | -0.76 (2.29)            | -0.50 (2.76)          | -0.81 (2.69)    | -0.78 (2.70)      | 2.13 (1.80)          | 2.47 (1.89)         | 2.63 (1.88)          | 1.65 (1.71)             | 2.15 (1.72)           | 2.11 (1.78)     | 2.01 (1.90)       |
| Left medial orbitofrontal cortex      | -0.86 (7.18)        | 1.88 (8.07)         | -0.77 (8.11)         | 0.61 (8.99)             | -1.44 (9.74)          | 0.63 (6.05)     | 0.57 (8.80)       | 5.11 (4.95)          | 6.73 (4.54)         | 6.68 (4.33)          | 7.70 (4.24)             | 8.13 (5.15)           | 4.71 (3.66)     | 7.54 (4.14)       |
| Left middle temporal gyrus            | 0.63 (3.48)         | -0.14 (3.03)        | 0.29 (3.01)          | 0.40 (2.91)             | 0.63 (3.17)           | 0.34 (4.07)     | 0.23 (5.22)       | 2.63 (2.27)          | 2.27 (1.92)         | 2.34 (1.82)          | 2.25 (1.81)             | 2.66 (1.71)           | 3.22 (2.37)     | 3.85 (3.39)       |
| Left parahippocampal gyrus            | -0.22 (3.57)        | -0.31 (4.01)        | -0.64 (5.09)         | 0.25 (4.01)             | 0.12 (4.69)           | -0.96 (5.08)    | -0.41 (4.28)      | 2.79 (2.12)          | 3.38 (2.00)         | 4.40 (2.39)          | 3.38 (2.00)             | 4.03 (2.18)           | 3.75 (3.44)     | 3.33 (2.58)       |
| Left paracentral lobule               | -0.66 (2.79)        | -0.73 (3.51)        | -0.40 (2.71)         | -0.33 (2.19)            | 0.26 (2.93)           | 0.14 (3.63)     | 0.33 (3.39)       | 2.18 (1.79)          | 3.00 (1.82)         | 2.23 (1.49)          | 1.69 (1.36)             | 2.19 (1.88)           | 2.77 (2.24)     | 2.68 (1.99)       |
| Left pars opercularis                 | -2.15 (3.53)        | 0.54 (3.46)         | -1.33 (3.52)         | 0.04 (2.87)             | -1.52 (3.08)          | 0.05 (2.42)     | -1.57 (3.09)      | 3.00 (2.79)          | 3.00 (1.63)         | 3.04 (2.11)          | 2.23 (1.72)             | 2.28 (2.52)           | 1.68 (1.68)     | 2.41 (2.45)       |
| Left pars orbitalis                   | -0.45 (3.89)        | -0.77 (4.74)        | -0.33 (4.27)         | -2.29 (4.48)            | -1.99 (3.70)          | 0.55 (4.17)     | 0.55 (4.02)       | 3.16 (2.15)          | 3.36 (3.32)         | 3.01 (2.95)          | 4.04 (2.88)             | 3.14 (2.72)           | 3.57 (2.04)     | 3.46 (1.93)       |

|                                         |               |               |               |               |               |               |               |              |               |               |              |               |               |              |
|-----------------------------------------|---------------|---------------|---------------|---------------|---------------|---------------|---------------|--------------|---------------|---------------|--------------|---------------|---------------|--------------|
| Left pars triangularis                  | -0.18 (3.82)  | -0.58 (4.74)  | 0.02 (3.92)   | 0.31 (3.39)   | 0.11 (3.34)   | -0.81 (3.65)  | 0.21 (3.53)   | 3.09 (2.11)  | 3.82 (2.69)   | 2.83 (2.61)   | 2.62 (2.08)  | 2.56 (2.05)   | 2.60 (2.61)   | 2.98 (1.74)  |
| Left pericalcarine cortex               | -2.03 (4.98)  | -0.82 (6.24)  | -0.97 (6.04)  | -1.96 (3.76)  | -1.65 (4.62)  | -2.59 (6.09)  | -3.53 (6.57)  | 4.41 (2.91)  | 4.90 (3.75)   | 4.66 (3.79)   | 3.35 (2.51)  | 3.71 (3.11)   | 5.30 (3.77)   | 5.91 (4.38)  |
| Left postcentral gyrus                  | -0.34 (2.99)  | -0.39 (2.21)  | -0.65 (2.15)  | -0.47 (2.12)  | -0.52 (2.65)  | -0.10 (2.07)  | -0.39 (2.59)  | 2.32 (1.82)  | 1.85 (1.18)   | 1.90 (1.12)   | 1.61 (1.39)  | 2.13 (1.56)   | 1.61 (1.23)   | 2.09 (1.48)  |
| Left posterior cingulate cortex         | -0.37 (2.46)  | -0.92 (2.86)  | -0.23 (2.46)  | -0.93 (2.48)  | -0.51 (2.17)  | -0.77 (3.42)  | -0.58 (3.02)  | 2.20 (1.01)  | 2.48 (1.60)   | 2.01 (1.35)   | 2.09 (1.54)  | 1.80 (1.24)   | 2.89 (1.85)   | 2.60 (1.50)  |
| Left precentral gyrus                   | 0.46 (1.75)   | -0.30 (1.35)  | -0.22 (1.58)  | -0.24 (2.44)  | 0.04 (2.30)   | 0.00 (2.07)   | 0.27 (2.22)   | 1.52 (0.91)  | 1.08 (0.82)   | 1.34 (0.80)   | 2.16 (1.03)  | 1.83 (1.30)   | 1.59 (1.27)   | 1.95 (0.99)  |
| Left precuneus                          | -1.35 (2.39)  | -0.27 (1.83)  | -1.16 (2.55)  | -1.38 (1.75)  | -1.58 (2.48)  | -0.42 (2.04)  | -0.65 (2.65)  | 1.87 (1.98)  | 1.41 (1.14)   | 2.18 (1.70)   | 1.86 (1.18)  | 2.28 (1.81)   | 1.54 (1.35)   | 1.93 (1.88)  |
| Left rostral anterior cingulate cortex  | -1.23 (4.37)  | 0.38 (6.22)   | 0.09 (4.99)   | -0.64 (4.51)  | 0.30 (3.42)   | -1.04 (4.24)  | -0.27 (3.95)  | 3.42 (2.87)  | 4.33 (4.35)   | 3.52 (3.42)   | 3.55 (2.71)  | 2.75 (1.94)   | 3.46 (2.52)   | 3.03 (2.42)  |
| Left rostral middle frontal gyrus       | -0.88 (2.94)  | -0.77 (3.56)  | -0.68 (3.25)  | -1.30 (3.23)  | -1.43 (3.05)  | -0.82 (2.89)  | -0.46 (2.74)  | 1.98 (2.30)  | 2.17 (2.87)   | 2.24 (2.39)   | 2.13 (2.72)  | 2.24 (2.47)   | 1.92 (2.26)   | 2.13 (1.70)  |
| Left superior frontal gyrus             | -0.78 (2.93)  | -1.10 (2.42)  | -0.93 (2.65)  | -1.11 (3.00)  | -1.75 (2.97)  | -0.74 (2.90)  | -0.49 (3.18)  | 1.87 (2.35)  | 1.87 (1.85)   | 1.89 (2.03)   | 2.23 (2.24)  | 2.36 (2.48)   | 2.13 (2.05)   | 2.09 (2.39)  |
| Left superior parietal cortex           | -0.40 (1.94)  | -0.43 (2.27)  | -0.50 (1.93)  | -0.78 (2.29)  | -0.75 (2.49)  | -0.65 (2.06)  | -0.66 (1.96)  | 1.58 (1.12)  | 1.79 (1.39)   | 1.35 (1.42)   | 2.13 (1.02)  | 2.04 (1.54)   | 1.74 (1.20)   | 1.43 (1.45)  |
| Left superior temporal gyrus            | 0.31 (3.09)   | -0.27 (2.51)  | 0.12 (3.43)   | -0.40 (2.49)  | -0.09 (2.48)  | -0.08 (3.61)  | 0.54 (3.64)   | 2.23 (2.08)  | 1.68 (1.84)   | 2.56 (2.18)   | 1.74 (1.78)  | 1.97 (1.41)   | 2.24 (2.77)   | 2.45 (2.68)  |
| Left supramarginal gyrus                | -0.29 (2.51)  | -0.15 (1.64)  | -0.12 (2.57)  | 0.16 (2.53)   | 0.11 (2.91)   | 0.59 (2.03)   | 0.61 (2.74)   | 2.01 (1.45)  | 1.31 (0.93)   | 2.15 (1.29)   | 1.97 (1.51)  | 2.35 (1.61)   | 1.61 (1.31)   | 2.10 (1.78)  |
| Left frontal pole                       | -0.65 (8.79)  | -0.31 (8.59)  | -0.73 (7.39)  | 1.68 (8.00)   | -1.88 (10.42) | -1.83 (6.20)  | -1.23 (8.93)  | 7.00 (5.05)  | 6.06 (5.89)   | 5.18 (5.16)   | 5.88 (5.49)  | 7.27 (7.47)   | 5.02 (3.89)   | 7.16 (5.15)  |
| Left temporal pole                      | 2.46 (7.17)   | 2.32 (5.31)   | 3.47 (5.66)   | 2.58 (5.24)   | 3.15 (6.70)   | 2.80 (8.05)   | 3.39 (7.66)   | 6.13 (4.23)  | 5.11 (2.46)   | 5.77 (3.06)   | 4.76 (3.23)  | 5.88 (4.31)   | 5.85 (6.06)   | 6.90 (4.50)  |
| Left transverse temporal gyrus          | 0.69 (5.03)   | -0.09 (4.44)  | 0.00 (4.25)   | -0.30 (4.59)  | 0.15 (4.63)   | 0.24 (3.82)   | 0.66 (4.37)   | 3.85 (3.17)  | 3.58 (2.45)   | 3.09 (2.81)   | 3.77 (2.44)  | 3.60 (2.77)   | 3.14 (2.04)   | 3.13 (3.01)  |
| Left insula                             | 0.55 (5.50)   | -0.98 (6.63)  | -0.21 (6.22)  | -0.70 (7.38)  | 1.52 (6.62)   | 0.38 (5.17)   | 1.04 (6.66)   | 3.85 (3.84)  | 4.90 (4.41)   | 4.64 (3.96)   | 5.92 (4.18)  | 5.18 (4.19)   | 3.46 (3.77)   | 5.41 (3.78)  |
| Right banks superior temporal sulcus    | 0.59 (4.90)   | 1.68 (4.19)   | 1.69 (4.39)   | -3.24 (5.47)  | -1.44 (5.99)  | 0.46 (4.66)   | 0.60 (5.76)   | 3.79 (3.01)  | 3.28 (3.02)   | 4.13 (2.03)   | 4.74 (4.14)  | 4.83 (3.63)   | 3.95 (2.31)   | 4.70 (3.15)  |
| Right caudal anterior cingulate cortex  | -4.09 (8.40)  | -4.68 (11.82) | -4.21 (12.75) | -2.57 (4.52)  | -3.17 (8.64)  | -4.36 (10.85) | -4.07 (10.14) | 6.11 (6.98)  | 6.60 (10.80)  | 7.31 (11.16)  | 3.78 (3.50)  | 5.37 (7.39)   | 7.16 (9.13)   | 6.07 (9.01)  |
| Right caudal middle frontal gyrus       | -1.22 (3.76)  | -1.41 (3.25)  | -1.32 (3.90)  | -0.86 (3.73)  | -0.84 (4.01)  | -0.35 (3.46)  | -0.95 (4.09)  | 3.16 (2.26)  | 2.81 (2.06)   | 3.36 (2.25)   | 2.93 (2.35)  | 3.38 (2.17)   | 2.72 (2.06)   | 3.07 (2.76)  |
| Right cuneus                            | -0.91 (3.29)  | -0.91 (3.19)  | -1.09 (3.36)  | -1.07 (3.02)  | -1.37 (3.53)  | -0.05 (2.34)  | -0.81 (2.90)  | 2.45 (2.30)  | 2.59 (1.98)   | 2.57 (2.35)   | 2.49 (1.94)  | 2.75 (2.54)   | 1.79 (1.44)   | 2.53 (1.51)  |
| Right entorhinal cortex                 | -3.14 (14.91) | -0.94 (19.41) | -5.23 (18.30) | -1.17 (13.40) | -1.91 (14.72) | -0.58 (16.97) | -1.07 (15.93) | 12.06 (8.82) | 13.97 (13.03) | 13.51 (13.01) | 10.37 (8.15) | 10.52 (10.13) | 12.02 (11.59) | 12.42 (9.52) |
| Right fusiform gyrus                    | 0.85 (4.25)   | 1.44 (4.84)   | 1.16 (4.56)   | 0.33 (3.38)   | 0.92 (3.73)   | 0.09 (3.50)   | 0.54 (4.13)   | 3.44 (2.48)  | 3.48 (3.56)   | 3.44 (3.10)   | 2.63 (2.04)  | 3.10 (2.14)   | 2.75 (2.05)   | 3.26 (2.47)  |
| Right inferior parietal cortex          | -0.86 (3.18)  | -0.65 (2.59)  | -0.93 (2.76)  | -0.20 (3.00)  | -0.72 (2.82)  | 0.98 (2.43)   | 0.12 (2.28)   | 2.43 (2.15)  | 1.81 (1.92)   | 1.95 (2.12)   | 2.24 (1.92)  | 2.24 (1.78)   | 1.61 (2.04)   | 1.63 (1.54)  |
| Right inferior temporal gyrus           | 0.56 (3.71)   | 0.67 (3.76)   | 0.96 (3.60)   | -0.06 (4.87)  | -0.23 (4.65)  | 1.17 (4.11)   | 0.40 (3.58)   | 3.06 (2.03)  | 2.86 (2.42)   | 3.00 (2.08)   | 3.54 (3.22)  | 3.62 (2.77)   | 3.24 (2.69)   | 2.83 (2.11)  |
| Right isthmus cingulate cortex          | 0.55 (5.46)   | 0.02 (4.09)   | 0.05 (4.07)   | -0.50 (4.34)  | 0.00 (4.76)   | -0.50 (3.60)  | 0.21 (3.61)   | 4.44 (3.02)  | 3.14 (2.49)   | 3.05 (2.57)   | 3.11 (2.96)  | 3.80 (2.69)   | 2.94 (2.01)   | 2.87 (2.07)  |
| Right lateral occipital cortex          | -0.36 (2.87)  | 0.11 (2.91)   | -0.32 (2.92)  | -0.08 (3.79)  | -0.43 (3.46)  | 0.64 (3.31)   | -0.01 (3.46)  | 2.06 (1.96)  | 2.10 (1.94)   | 1.93 (2.15)   | 2.74 (2.53)  | 2.50 (2.34)   | 1.93 (2.72)   | 2.27 (2.54)  |
| Right lateral orbitofrontal cortex      | 0.44 (4.97)   | -0.47 (5.01)  | 1.42 (4.01)   | 1.10 (5.25)   | 0.48 (4.20)   | 0.01 (5.63)   | 0.65 (5.62)   | 3.47 (3.48)  | 4.08 (2.75)   | 3.79 (1.72)   | 4.06 (3.36)  | 2.96 (2.92)   | 4.70 (2.84)   | 4.32 (3.48)  |
| Right lingual gyrus                     | -0.53 (2.72)  | -0.09 (2.44)  | -0.35 (2.05)  | -0.19 (2.68)  | -0.53 (2.08)  | -0.36 (3.37)  | -0.46 (2.84)  | 2.26 (1.50)  | 1.84 (1.54)   | 1.71 (1.10)   | 2.15 (1.52)  | 1.76 (1.15)   | 2.90 (1.59)   | 2.39 (1.49)  |
| Right medial orbitofrontal cortex       | -0.39 (3.61)  | 1.47 (3.76)   | -0.92 (2.71)  | -0.34 (4.60)  | -1.41 (3.74)  | -1.78 (4.79)  | -1.68 (3.97)  | 2.82 (2.17)  | 2.99 (2.63)   | 2.34 (1.55)   | 3.34 (3.06)  | 3.09 (2.45)   | 3.89 (3.20)   | 3.48 (2.41)  |
| Right middle temporal gyrus             | 0.28 (2.33)   | 0.18 (2.57)   | 0.12 (2.20)   | 0.29 (3.50)   | -0.86 (3.58)  | 1.10 (2.38)   | -0.22 (2.83)  | 1.96 (1.20)  | 1.90 (1.66)   | 1.73 (1.29)   | 2.58 (2.29)  | 2.64 (2.48)   | 2.34 (1.07)   | 2.39 (1.41)  |
| Right parahippocampal gyrus             | 1.09 (2.79)   | 0.15 (3.92)   | 1.30 (3.11)   | -0.48 (5.55)  | 0.81 (4.16)   | 0.23 (3.63)   | 1.93 (2.75)   | 2.56 (1.44)  | 2.83 (2.61)   | 2.34 (2.38)   | 4.37 (3.27)  | 3.13 (2.75)   | 2.59 (2.47)   | 2.61 (2.06)  |
| Right paracentral lobule                | -1.24 (3.77)  | -1.17 (3.51)  | -1.37 (4.08)  | -1.07 (2.43)  | -0.63 (3.94)  | -1.08 (2.98)  | -1.16 (3.44)  | 3.00 (2.50)  | 2.62 (2.54)   | 3.24 (2.73)   | 1.86 (1.86)  | 3.15 (2.31)   | 2.56 (1.76)   | 2.94 (2.01)  |
| Right pars opercularis                  | 0.47 (2.46)   | -0.11 (3.50)  | 0.28 (3.15)   | 1.46 (3.24)   | -0.01 (2.89)  | -0.63 (5.02)  | -0.75 (3.83)  | 2.05 (1.35)  | 2.77 (2.02)   | 2.22 (2.18)   | 2.76 (2.16)  | 2.30 (1.65)   | 3.90 (3.06)   | 3.52 (1.44)  |
| Right pars orbitalis                    | 0.44 (3.88)   | 0.25 (2.75)   | 0.47 (3.45)   | -0.42 (3.98)  | -0.48 (4.54)  | 1.34 (3.76)   | 0.92 (4.11)   | 3.21 (2.05)  | 2.08 (1.74)   | 2.82 (1.90)   | 2.88 (2.68)  | 3.62 (2.61)   | 3.07 (2.45)   | 3.62 (1.96)  |
| Right pars triangularis                 | -1.05 (3.74)  | -0.63 (3.07)  | -0.74 (2.86)  | -1.03 (2.31)  | -1.03 (3.12)  | -0.39 (3.55)  | -0.12 (3.39)  | 2.96 (2.41)  | 2.30 (2.05)   | 2.22 (1.88)   | 1.72 (1.82)  | 2.14 (2.44)   | 2.65 (2.29)   | 2.32 (2.40)  |
| Right pericalcarine cortex              | -1.73 (5.06)  | -1.31 (3.92)  | -1.34 (5.51)  | -0.43 (4.51)  | -0.89 (4.97)  | -1.85 (4.36)  | -1.23 (4.68)  | 4.26 (3.07)  | 2.91 (2.85)   | 4.24 (3.62)   | 3.46 (2.78)  | 3.84 (3.13)   | 3.45 (3.15)   | 3.75 (2.92)  |
| Right postcentral gyrus                 | -0.02 (2.79)  | 0.27 (1.76)   | 0.45 (2.14)   | 0.46 (2.49)   | 0.43 (2.59)   | 0.41 (2.52)   | 0.01 (2.69)   | 1.99 (1.89)  | 1.41 (1.04)   | 1.58 (1.46)   | 2.12 (1.28)  | 1.86 (1.80)   | 1.78 (1.77)   | 1.98 (1.74)  |
| Right posterior cingulate cortex        | -0.17 (2.39)  | -0.86 (2.99)  | -0.19 (2.28)  | -0.76 (2.63)  | -0.48 (2.31)  | -0.79 (3.34)  | -0.34 (2.60)  | 1.78 (1.53)  | 2.20 (2.13)   | 2.01 (0.97)   | 1.85 (1.98)  | 1.83 (1.41)   | 2.67 (2.06)   | 1.92 (1.72)  |
| Right precentral gyrus                  | -0.05 (2.97)  | -0.23 (2.85)  | -0.11 (3.32)  | -0.17 (2.62)  | -0.29 (2.77)  | 0.50 (3.13)   | 0.34 (2.85)   | 2.25 (1.85)  | 1.70 (2.26)   | 2.40 (2.21)   | 1.92 (1.71)  | 1.97 (1.90)   | 2.18 (2.23)   | 2.11 (1.87)  |
| Right precuneus                         | -0.73 (2.58)  | 0.53 (1.86)   | -0.32 (2.17)  | -0.38 (1.86)  | -0.69 (1.31)  | 0.34 (2.11)   | -0.51 (2.88)  | 1.93 (1.81)  | 1.36 (1.34)   | 1.62 (1.42)   | 1.47 (1.15)  | 1.08 (0.99)   | 1.65 (1.28)   | 2.00 (2.07)  |
| Right rostral anterior cingulate cortex | 0.70 (4.82)   | -0.39 (7.28)  | -0.10 (5.86)  | 0.11 (4.68)   | -0.22 (4.86)  | 1.06 (4.81)   | 0.47 (4.19)   | 3.75 (2.96)  | 5.41 (4.69)   | 4.10 (4.05)   | 3.88 (2.42)  | 3.80 (2.88)   | 3.79 (3.00)   | 3.19 (2.64)  |
| Right rostral middle frontal gyrus      | -0.87 (4.40)  | -0.88 (3.83)  | -0.83 (4.11)  | -1.00 (3.14)  | -2.06 (3.51)  | -0.53 (3.21)  | -0.91 (3.79)  | 3.01 (3.24)  | 2.75 (2.72)   | 3.12 (2.69)   | 2.55 (2.00)  | 2.68 (3.02)   | 2.54 (1.92)   | 2.91 (2.49)  |
| Right superior frontal gyrus            | -0.74 (3.09)  | -0.72 (3.08)  | -0.64 (3.35)  | -0.81 (2.22)  | -1.56 (3.04)  | 0.09 (2.71)   | -0.49 (2.99)  | 2.30 (2.12)  | 2.20 (2.21)   | 2.31 (2.44)   | 1.74 (1.55)  | 2.42 (2.37)   | 1.78 (2.00)   | 2.13 (2.08)  |
| Right superior parietal cortex          | 0.46 (2.64)   | 0.33 (2.94)   | 0.46 (2.79)   | -0.33 (3.15)  | -0.13 (2.53)  | 0.02 (2.52)   | 0.44 (3.04)   | 1.90 (1.82)  | 2.29 (1.78)   | 2.08 (1.84)   | 2.14 (2.26)  | 1.70 (1.82)   | 1.71 (1.79)   | 1.80 (2.45)  |
| Right superior temporal gyrus           | -1.29 (3.16)  | -1.48 (2.19)  | -1.10 (2.46)  | -1.08 (3.20)  | -1.39 (3.57)  | -0.71 (2.01)  | -0.49 (2.49)  | 2.52 (2.24)  | 2.09 (1.58)   | 1.96 (1.81)   | 2.48 (2.22)  | 2.72 (2.62)   | 1.72 (1.19)   | 1.96 (1.53)  |

|                                        |               |               |               |              |               |              |              |             |              |               |             |              |             |              |
|----------------------------------------|---------------|---------------|---------------|--------------|---------------|--------------|--------------|-------------|--------------|---------------|-------------|--------------|-------------|--------------|
| Right supramarginal gyrus              | 0.06 (2.32)   | -0.21 (1.64)  | -0.72 (1.93)  | -0.24 (2.36) | -0.69 (2.00)  | 0.46 (1.57)  | -0.10 (1.97) | 1.78 (1.42) | 1.36 (0.88)  | 1.70 (1.09)   | 1.95 (1.26) | 1.64 (1.28)  | 1.15 (1.14) | 1.68 (0.93)  |
| Right frontal pole                     | -0.30 (4.75)  | -2.55 (9.58)  | -0.36 (8.41)  | 0.74 (10.36) | -4.17 (13.09) | -3.08 (7.75) | -3.41 (6.36) | 3.64 (2.93) | 7.76 (5.88)  | 5.76 (5.95)   | 7.32 (7.12) | 8.52 (10.61) | 6.08 (5.55) | 5.02 (5.10)  |
| Right temporal pole                    | 0.56 (9.38)   | 0.24 (4.57)   | 0.39 (7.56)   | 1.68 (9.34)  | -0.09 (9.33)  | -1.08 (5.33) | -1.78 (7.65) | 6.43 (6.65) | 3.74 (2.47)  | 5.09 (5.44)   | 7.21 (5.90) | 6.29 (6.69)  | 4.49 (2.85) | 5.36 (5.58)  |
| Right transverse temporal gyrus        | -1.47 (6.00)  | 0.17 (6.87)   | -1.13 (6.04)  | -0.85 (6.33) | -1.12 (6.44)  | -2.23 (7.11) | -2.23 (5.74) | 3.99 (4.62) | 5.54 (3.81)  | 4.64 (3.85)   | 4.96 (3.82) | 4.83 (4.24)  | 5.89 (4.35) | 4.98 (3.44)  |
| Right insula                           | -0.10 (4.58)  | 0.52 (5.14)   | -0.75 (4.48)  | -0.39 (5.17) | -0.92 (4.23)  | 2.87 (4.65)  | 1.77 (3.68)  | 3.80 (2.36) | 3.65 (3.53)  | 3.49 (2.77)   | 4.03 (3.09) | 3.41 (2.53)  | 4.02 (3.63) | 3.01 (2.69)  |
| <b>Local cortical surface (cm²)</b>    |               |               |               |              |               |              |              |             |              |               |             |              |             |              |
| Left banks superior temporal sulcus    | -0.55 (3.40)  | 0.83 (3.56)   | 0.21 (3.87)   | -0.72 (2.66) | -1.37 (3.60)  | 1.24 (3.48)  | -0.54 (3.66) | 2.77 (1.92) | 2.61 (2.47)  | 3.19 (2.06)   | 2.25 (1.48) | 2.86 (2.51)  | 2.57 (2.59) | 3.14 (1.79)  |
| Left caudal anterior cingulate cortex  | -1.29 (3.96)  | -0.34 (4.40)  | -1.32 (4.24)  | 0.25 (5.31)  | 0.00 (4.71)   | 0.75 (2.86)  | 0.89 (2.40)  | 3.49 (2.10) | 3.78 (2.05)  | 3.99 (1.68)   | 4.14 (3.15) | 3.89 (2.46)  | 2.26 (1.84) | 1.95 (1.60)  |
| Left caudal middle frontal gyrus       | 0.54 (1.89)   | 0.47 (2.10)   | 0.15 (2.64)   | 0.08 (2.20)  | 0.32 (2.27)   | -0.14 (1.87) | 0.45 (1.90)  | 1.56 (1.14) | 1.57 (1.42)  | 1.89 (1.78)   | 1.42 (1.64) | 1.70 (1.47)  | 1.42 (1.18) | 1.54 (1.14)  |
| Left cuneus                            | -0.58 (2.88)  | 0.32 (2.49)   | -0.04 (2.24)  | 0.31 (3.27)  | 0.13 (2.96)   | -0.11 (2.31) | 0.19 (2.10)  | 2.34 (1.68) | 1.80 (1.70)  | 1.78 (1.28)   | 2.47 (2.07) | 1.85 (2.27)  | 1.71 (1.49) | 1.58 (1.33)  |
| Left entorhinal cortex                 | 0.83 (10.17)  | 0.85 (8.51)   | 0.73 (9.73)   | -0.50 (8.11) | -0.06 (12.03) | -1.65 (7.52) | -0.64 (8.65) | 8.06 (5.91) | 6.21 (5.66)  | 7.94 (5.29)   | 6.23 (4.97) | 10.05 (6.08) | 6.47 (3.85) | 7.24 (4.39)  |
| Left fusiform gyrus                    | 0.59 (2.05)   | 0.83 (2.46)   | 0.54 (2.63)   | 0.53 (2.63)  | 0.12 (2.37)   | 1.20 (2.37)  | 1.12 (2.07)  | 1.72 (1.19) | 2.24 (1.20)  | 1.97 (1.75)   | 2.05 (1.65) | 1.86 (1.40)  | 2.09 (1.57) | 1.67 (1.63)  |
| Left inferior parietal cortex          | -0.16 (1.72)  | -0.02 (1.46)  | -0.38 (1.59)  | 0.29 (2.38)  | 0.08 (1.97)   | -0.62 (1.71) | -0.19 (1.56) | 1.33 (1.05) | 1.17 (0.82)  | 1.24 (1.02)   | 1.59 (1.75) | 1.43 (1.31)  | 1.37 (1.16) | 1.26 (0.87)  |
| Left inferior temporal gyrus           | -0.43 (2.33)  | -0.39 (3.02)  | -0.21 (2.20)  | -0.20 (2.46) | 0.04 (2.26)   | -0.25 (2.04) | -0.36 (2.10) | 1.75 (1.53) | 1.86 (2.36)  | 1.73 (1.31)   | 2.01 (1.33) | 1.55 (1.60)  | 1.65 (1.16) | 1.70 (1.21)  |
| Left isthmus cingulate cortex          | 0.51 (3.96)   | -0.55 (3.67)  | -0.08 (3.14)  | 0.49 (2.21)  | 0.86 (2.19)   | -0.45 (3.70) | 0.10 (4.07)  | 3.37 (1.97) | 2.93 (2.15)  | 2.33 (2.02)   | 1.78 (1.33) | 1.82 (1.44)  | 3.15 (1.82) | 3.31 (2.23)  |
| Left lateral occipital cortex          | 0.46 (1.61)   | 0.80 (1.50)   | 0.45 (1.83)   | 0.15 (1.92)  | -0.13 (1.84)  | 0.89 (1.62)  | 0.62 (1.39)  | 1.35 (0.94) | 1.12 (1.27)  | 1.55 (1.01)   | 1.58 (1.04) | 1.56 (0.90)  | 1.36 (1.22) | 1.16 (0.95)  |
| Left lateral orbitofrontal cortex      | -1.04 (3.64)  | -0.86 (2.70)  | -0.23 (3.53)  | -0.80 (3.47) | -0.85 (3.41)  | -1.37 (3.53) | -0.68 (3.96) | 3.04 (2.13) | 2.16 (1.77)  | 2.77 (2.09)   | 2.51 (2.45) | 2.84 (1.93)  | 2.73 (2.55) | 3.01 (2.55)  |
| Left lingual gyrus                     | 0.84 (2.54)   | 0.84 (1.58)   | 1.32 (1.48)   | 0.13 (2.01)  | 0.76 (2.48)   | 0.43 (1.92)  | 1.17 (2.22)  | 2.04 (1.67) | 1.54 (0.86)  | 1.52 (1.26)   | 1.46 (1.33) | 1.81 (1.81)  | 1.41 (1.33) | 1.91 (1.57)  |
| Left medial orbitofrontal cortex       | 1.04 (8.61)   | 3.09 (10.36)  | 1.40 (10.40)  | 1.76 (10.80) | 0.58 (11.91)  | 0.99 (8.19)  | 1.89 (11.28) | 6.48 (5.52) | 9.25 (5.12)  | 8.46 (5.81)   | 8.49 (6.56) | 9.76 (6.38)  | 6.54 (4.73) | 10.19 (4.49) |
| Left middle temporal gyrus             | 0.06 (2.24)   | -0.03 (2.25)  | 0.18 (2.32)   | 0.28 (2.08)  | 0.71 (2.20)   | 0.24 (2.47)  | 0.59 (2.56)  | 1.56 (1.56) | 1.81 (1.26)  | 1.76 (1.44)   | 1.48 (1.44) | 1.83 (1.35)  | 1.88 (1.54) | 1.88 (1.77)  |
| Left parahippocampal gyrus             | -0.98 (3.62)  | 0.05 (3.92)   | -0.41 (3.96)  | 1.06 (3.50)  | -0.35 (3.94)  | -0.93 (4.50) | -0.92 (4.04) | 2.97 (2.17) | 3.40 (1.74)  | 3.10 (2.37)   | 2.62 (2.48) | 3.35 (1.91)  | 3.22 (3.18) | 3.09 (2.65)  |
| Left paracentral lobule                | -0.33 (1.95)  | -0.51 (1.93)  | -0.13 (1.62)  | 0.11 (1.36)  | 0.17 (1.53)   | 0.39 (2.58)  | 0.12 (1.98)  | 1.57 (1.13) | 1.45 (1.32)  | 1.40 (0.75)   | 0.97 (0.93) | 1.24 (0.85)  | 2.25 (1.20) | 1.71 (0.90)  |
| Left pars opercularis                  | -1.44 (3.00)  | 0.61 (3.27)   | -0.83 (3.58)  | 0.24 (1.98)  | -1.12 (2.90)  | 0.06 (2.06)  | -1.19 (2.87) | 2.50 (2.12) | 2.75 (1.75)  | 2.76 (2.33)   | 1.57 (1.16) | 2.29 (2.03)  | 1.69 (1.09) | 2.21 (2.13)  |
| Left pars orbitalis                    | 1.50 (4.12)   | 0.76 (4.13)   | 1.01 (3.58)   | -0.38 (3.16) | -0.06 (2.59)  | 1.12 (4.41)  | 1.50 (3.77)  | 3.66 (2.26) | 2.66 (3.18)  | 2.74 (2.43)   | 2.47 (1.92) | 2.07 (1.46)  | 3.46 (2.83) | 3.02 (2.62)  |
| Left pars triangularis                 | 0.01 (2.70)   | -0.65 (2.89)  | -0.02 (2.67)  | 0.24 (3.02)  | 0.26 (2.54)   | -1.54 (2.99) | -0.54 (2.37) | 2.14 (1.54) | 2.23 (1.87)  | 2.27 (1.29)   | 2.41 (1.73) | 2.02 (1.47)  | 2.75 (1.85) | 1.60 (1.80)  |
| Left pericalcarine cortex              | -0.09 (2.92)  | 0.82 (2.96)   | 1.34 (2.68)   | 0.42 (2.65)  | 0.80 (2.48)   | -0.21 (3.74) | 0.11 (3.80)  | 2.39 (1.55) | 2.71 (1.29)  | 2.28 (1.88)   | 2.02 (1.69) | 2.15 (1.39)  | 2.99 (2.11) | 2.91 (2.33)  |
| Left postcentral gyrus                 | 0.13 (1.39)   | -0.46 (1.27)  | -0.15 (1.01)  | -0.32 (1.01) | -0.19 (0.79)  | -0.43 (1.34) | -0.17 (0.96) | 1.19 (0.67) | 0.94 (0.94)  | 0.88 (0.46)   | 0.87 (0.56) | 0.61 (0.51)  | 1.08 (0.87) | 0.74 (0.61)  |
| Left posterior cingulate cortex        | 0.04 (3.14)   | -0.04 (2.11)  | 0.03 (2.98)   | 0.07 (2.64)  | 0.18 (3.49)   | -0.36 (3.28) | 0.04 (3.41)  | 2.63 (1.58) | 1.67 (1.23)  | 2.24 (1.88)   | 1.94 (1.72) | 3.04 (1.56)  | 2.48 (2.08) | 2.72 (1.93)  |
| Left precentral gyrus                  | 0.57 (1.15)   | -0.13 (0.77)  | 0.24 (0.96)   | 0.00 (1.19)  | 0.10 (1.10)   | 0.00 (1.19)  | 0.09 (1.14)  | 1.00 (0.78) | 0.65 (0.40)  | 0.71 (0.66)   | 0.93 (0.71) | 0.92 (0.56)  | 0.88 (0.76) | 0.88 (0.69)  |
| Left precuneus                         | -0.90 (1.41)  | -0.40 (1.11)  | -0.93 (1.55)  | -0.70 (1.34) | -1.08 (1.21)  | -0.46 (1.42) | -0.57 (1.60) | 1.41 (0.83) | 0.94 (0.68)  | 1.46 (1.02)   | 1.28 (0.76) | 1.28 (0.99)  | 1.13 (0.94) | 1.27 (1.08)  |
| Left rostral anterior cingulate cortex | -0.27 (4.84)  | 2.25 (7.31)   | 1.60 (5.93)   | -1.13 (5.27) | 0.99 (3.76)   | -1.43 (3.62) | 0.38 (4.16)  | 3.52 (3.21) | 4.75 (5.90)  | 4.39 (4.16)   | 4.08 (3.38) | 3.17 (2.10)  | 3.21 (2.08) | 3.39 (2.28)  |
| Left rostral middle frontal gyrus      | -0.87 (2.94)  | -1.15 (3.08)  | -0.55 (2.56)  | -1.21 (2.53) | -0.67 (2.44)  | -0.82 (2.27) | 0.27 (2.07)  | 2.18 (2.10) | 2.12 (2.47)  | 1.84 (1.80)   | 1.94 (1.98) | 1.78 (1.75)  | 1.83 (1.53) | 1.60 (1.29)  |
| Left superior frontal gyrus            | -0.06 (1.64)  | -0.21 (1.62)  | -0.04 (1.49)  | -0.32 (1.66) | -0.57 (1.38)  | -0.21 (1.64) | 0.05 (1.65)  | 1.33 (0.89) | 1.36 (0.84)  | 1.16 (0.89)   | 1.27 (1.07) | 1.19 (0.86)  | 1.34 (0.91) | 1.34 (0.90)  |
| Left superior parietal cortex          | 0.08 (0.80)   | 0.48 (0.86)   | 0.25 (0.86)   | -0.21 (1.13) | -0.15 (1.05)  | -0.12 (1.02) | -0.19 (0.79) | 0.58 (0.54) | 0.78 (0.58)  | 0.77 (0.43)   | 0.92 (0.65) | 0.83 (0.62)  | 0.82 (0.59) | 0.70 (0.38)  |
| Left superior temporal gyrus           | 0.72 (1.34)   | -0.22 (1.03)  | 0.56 (1.57)   | 0.07 (1.11)  | 0.49 (1.30)   | -0.05 (1.43) | 0.77 (1.71)  | 1.19 (0.92) | 0.87 (0.55)  | 1.27 (1.04)   | 0.90 (0.61) | 1.08 (0.84)  | 1.17 (0.77) | 1.23 (1.40)  |
| Left supramarginal gyrus               | -0.85 (1.76)  | -0.17 (1.16)  | -0.46 (2.00)  | 0.18 (1.46)  | -0.37 (1.51)  | 0.08 (1.31)  | -0.22 (1.62) | 1.50 (1.21) | 0.92 (0.70)  | 1.54 (1.31)   | 1.18 (0.82) | 1.22 (0.92)  | 1.12 (0.63) | 1.28 (0.97)  |
| Left frontal pole                      | -2.87 (8.06)  | -0.76 (6.85)  | -1.03 (6.94)  | -0.07 (6.84) | -1.30 (8.50)  | -2.01 (6.72) | -0.76 (7.27) | 7.54 (3.63) | 5.47 (3.96)  | 5.19 (4.53)   | 5.05 (4.43) | 6.54 (5.33)  | 5.62 (3.97) | 5.93 (4.00)  |
| Left temporal pole                     | -0.28 (6.10)  | 0.57 (6.72)   | 2.11 (6.30)   | 0.99 (5.69)  | 1.00 (6.56)   | -1.02 (6.52) | 0.42 (7.11)  | 5.08 (3.12) | 5.11 (4.19)  | 4.67 (4.61)   | 4.25 (3.76) | 4.92 (4.27)  | 5.34 (3.64) | 6.05 (3.42)  |
| Left transverse temporal gyrus         | 0.87 (4.19)   | -0.50 (2.91)  | -0.35 (2.08)  | -0.61 (4.31) | -0.36 (3.12)  | 0.17 (1.73)  | 0.63 (2.07)  | 2.91 (3.06) | 2.16 (1.95)  | 1.78 (1.04)   | 3.50 (2.41) | 2.49 (1.80)  | 1.50 (0.79) | 1.57 (1.44)  |
| Left insula                            | 0.48 (7.84)   | -1.26 (8.31)  | 0.39 (10.59)  | -1.82 (9.40) | 1.54 (9.09)   | -1.51 (8.38) | 0.48 (9.68)  | 6.06 (4.75) | 6.70 (4.79)  | 8.69 (5.63)   | 7.97 (4.90) | 7.04 (5.68)  | 6.34 (5.45) | 7.95 (5.15)  |
| Right banks superior temporal sulcus   | 0.29 (3.11)   | 0.56 (2.94)   | 1.10 (2.85)   | -3.17 (4.17) | -1.57 (4.37)  | -0.72 (3.53) | -0.03 (4.12) | 2.43 (1.87) | 2.32 (1.80)  | 2.30 (1.95)   | 3.66 (3.72) | 3.51 (2.93)  | 3.08 (1.70) | 3.65 (1.66)  |
| Right caudal anterior cingulate cortex | -1.09 (6.09)  | -0.60 (6.67)  | -0.84 (8.73)  | -0.71 (4.30) | -0.65 (5.50)  | -0.63 (6.25) | -0.22 (6.25) | 4.91 (3.56) | 4.61 (4.72)  | 6.00 (6.21)   | 3.35 (2.65) | 4.14 (3.51)  | 4.51 (4.21) | 4.45 (4.25)  |
| Right caudal middle frontal gyrus      | -0.40 (2.24)  | -0.80 (1.81)  | -0.94 (2.94)  | 0.13 (3.10)  | 0.28 (3.40)   | 0.40 (2.54)  | 0.13 (2.34)  | 1.82 (1.30) | 1.59 (1.13)  | 2.61 (1.53)   | 2.67 (1.42) | 2.57 (2.14)  | 2.00 (1.53) | 1.84 (1.37)  |
| Right cuneus                           | 0.14 (2.26)   | -0.09 (1.92)  | 0.24 (2.25)   | 0.69 (3.18)  | -0.17 (3.37)  | 1.24 (2.23)  | 0.30 (2.71)  | 1.75 (1.37) | 1.52 (1.10)  | 1.72 (1.41)   | 2.39 (2.14) | 2.62 (2.01)  | 1.97 (1.58) | 1.93 (1.85)  |
| Right entorhinal cortex                | -2.00 (10.03) | -1.77 (16.25) | -4.40 (14.70) | 0.35 (8.13)  | -1.05 (9.58)  | 2.10 (9.13)  | 0.85 (10.62) | 8.30 (5.59) | 9.42 (13.15) | 11.12 (10.24) | 5.97 (5.31) | 7.58 (5.63)  | 7.60 (5.14) | 8.85 (5.48)  |

|                                         |              |              |              |              |              |              |              |             |             |             |             |             |             |             |
|-----------------------------------------|--------------|--------------|--------------|--------------|--------------|--------------|--------------|-------------|-------------|-------------|-------------|-------------|-------------|-------------|
| Right fusiform gyrus                    | 0.71 (1.87)  | 0.55 (2.68)  | 0.45 (2.43)  | 0.38 (2.29)  | 0.51 (1.87)  | -0.26 (2.01) | 0.07 (2.03)  | 1.77 (0.83) | 1.94 (1.87) | 2.00 (1.36) | 1.75 (1.46) | 1.67 (0.90) | 1.70 (1.00) | 1.62 (1.16) |
| Right inferior parietal cortex          | -0.68 (1.77) | -0.80 (2.47) | -0.75 (1.91) | -0.11 (2.70) | -0.32 (2.30) | 0.41 (1.82)  | -0.15 (1.13) | 1.35 (1.30) | 1.77 (1.86) | 1.33 (1.53) | 1.78 (1.99) | 1.65 (1.58) | 1.25 (1.35) | 0.97 (0.55) |
| Right inferior temporal gyrus           | 0.46 (2.78)  | 0.63 (1.92)  | 0.91 (2.02)  | 0.09 (2.83)  | 0.48 (2.68)  | 0.88 (2.73)  | 0.46 (2.70)  | 2.34 (1.45) | 1.79 (0.83) | 1.91 (1.03) | 2.04 (1.89) | 2.12 (1.63) | 2.33 (1.57) | 2.33 (1.32) |
| Right isthmus cingulate cortex          | 0.81 (3.18)  | 0.15 (3.27)  | 0.37 (3.51)  | -1.07 (3.18) | -0.46 (2.88) | -0.05 (2.32) | 0.73 (3.01)  | 2.63 (1.86) | 2.76 (1.60) | 2.71 (2.15) | 2.63 (1.99) | 2.12 (1.92) | 1.80 (1.38) | 2.05 (2.26) |
| Right lateral occipital cortex          | -0.67 (1.66) | -0.10 (1.21) | -0.44 (1.42) | -0.56 (1.68) | -0.84 (1.89) | -0.45 (2.01) | -0.79 (1.77) | 1.30 (1.20) | 0.93 (0.74) | 1.12 (0.94) | 1.34 (1.11) | 1.51 (1.37) | 1.54 (1.30) | 1.67 (0.90) |
| Right lateral orbitofrontal cortex      | 0.27 (6.91)  | -0.87 (3.83) | 1.94 (6.17)  | 1.83 (7.24)  | 1.01 (6.16)  | -0.78 (7.68) | 0.83 (6.70)  | 4.99 (4.60) | 3.34 (1.89) | 5.32 (3.45) | 5.39 (5.00) | 4.21 (4.48) | 6.12 (4.43) | 4.93 (4.43) |
| Right lingual gyrus                     | -0.05 (2.12) | 0.84 (1.64)  | 0.68 (2.00)  | 0.32 (1.66)  | 0.21 (1.78)  | 0.56 (2.78)  | 0.52 (2.25)  | 1.62 (1.30) | 1.37 (1.19) | 1.61 (1.30) | 1.24 (1.12) | 1.20 (1.30) | 2.18 (1.74) | 1.58 (1.64) |
| Right medial orbitofrontal cortex       | 0.35 (4.55)  | 1.91 (4.30)  | -0.06 (2.70) | 0.98 (6.44)  | 0.76 (5.60)  | -1.77 (5.45) | -0.81 (4.06) | 3.48 (2.82) | 3.73 (2.74) | 2.33 (1.22) | 4.70 (4.35) | 4.08 (3.77) | 4.67 (3.13) | 3.20 (2.51) |
| Right middle temporal gyrus             | 0.20 (1.45)  | 0.02 (1.84)  | 0.05 (1.40)  | 0.64 (2.25)  | 0.15 (1.53)  | 0.25 (1.47)  | 0.24 (1.06)  | 1.17 (0.83) | 1.37 (1.17) | 1.11 (0.80) | 1.79 (1.45) | 1.05 (1.10) | 1.02 (1.05) | 0.87 (0.62) |
| Right parahippocampal gyrus             | 1.95 (3.65)  | 0.70 (4.59)  | 1.91 (3.60)  | -0.01 (5.08) | 1.11 (4.50)  | 0.85 (3.79)  | 2.49 (3.90)  | 2.78 (3.02) | 3.70 (2.63) | 3.10 (2.57) | 3.76 (3.28) | 3.55 (2.85) | 3.26 (1.95) | 3.39 (3.10) |
| Right paracentral lobule                | -0.19 (2.99) | -0.33 (2.78) | -0.15 (2.28) | 0.13 (2.33)  | 0.18 (2.84)  | -0.20 (2.10) | -0.11 (2.39) | 2.39 (1.70) | 1.92 (1.98) | 1.85 (1.25) | 1.47 (1.78) | 2.11 (1.83) | 1.68 (1.20) | 2.02 (1.17) |
| Right pars opercularis                  | 0.41 (2.15)  | -0.19 (3.31) | 0.15 (2.40)  | 1.25 (2.65)  | 0.23 (2.18)  | -1.28 (4.70) | -0.95 (3.10) | 1.45 (1.59) | 2.40 (2.20) | 1.95 (1.32) | 2.37 (1.64) | 1.82 (1.13) | 3.74 (2.98) | 2.84 (1.39) |
| Right pars orbitalis                    | -0.07 (3.95) | 0.69 (2.99)  | 0.64 (2.83)  | 0.60 (3.03)  | 0.39 (3.33)  | 0.75 (2.69)  | 0.58 (3.39)  | 2.90 (2.58) | 2.51 (1.64) | 2.42 (1.49) | 2.24 (2.06) | 2.71 (1.84) | 2.08 (1.79) | 2.78 (1.90) |
| Right pars triangularis                 | -0.52 (2.30) | -0.48 (1.98) | -0.49 (2.15) | -1.49 (2.45) | -0.76 (2.39) | -0.39 (2.25) | 0.18 (2.03)  | 1.90 (1.33) | 1.71 (1.02) | 1.78 (1.22) | 2.47 (1.37) | 2.11 (1.26) | 1.83 (1.28) | 1.56 (1.24) |
| Right pericalcarine cortex              | 0.34 (3.21)  | 0.23 (2.40)  | 0.40 (2.98)  | 1.78 (2.73)  | 0.49 (2.95)  | 0.51 (2.20)  | -0.07 (2.16) | 2.39 (2.08) | 2.09 (1.07) | 2.03 (2.16) | 2.65 (1.82) | 2.44 (1.62) | 1.90 (1.12) | 1.76 (1.16) |
| Right postcentral gyrus                 | -0.21 (1.41) | -0.16 (1.07) | 0.27 (1.21)  | -0.22 (1.06) | 0.10 (1.34)  | 0.00 (1.29)  | -0.03 (1.35) | 1.05 (0.93) | 0.77 (0.73) | 1.03 (0.65) | 0.92 (0.52) | 1.10 (0.72) | 1.04 (0.71) | 0.96 (0.91) |
| Right posterior cingulate cortex        | 0.16 (2.35)  | -0.80 (3.30) | -0.66 (2.30) | -0.46 (2.28) | -0.89 (1.75) | -0.76 (2.36) | -0.47 (2.03) | 1.83 (1.41) | 2.61 (2.07) | 1.97 (1.27) | 1.79 (1.42) | 1.52 (1.20) | 1.97 (1.44) | 1.84 (0.87) |
| Right precentral gyrus                  | 0.11 (1.31)  | -0.09 (1.22) | -0.01 (1.72) | -0.15 (0.98) | 0.05 (1.42)  | 0.01 (1.25)  | 0.48 (1.58)  | 0.98 (0.83) | 0.90 (0.79) | 1.18 (1.22) | 0.81 (0.54) | 1.05 (0.91) | 0.90 (0.84) | 1.25 (1.04) |
| Right precuneus                         | -0.44 (1.57) | -0.01 (1.03) | -0.34 (0.93) | -0.17 (1.40) | -0.27 (1.29) | 0.27 (1.18)  | -0.21 (1.41) | 1.23 (1.02) | 0.76 (0.67) | 0.86 (0.44) | 0.98 (0.97) | 1.06 (0.74) | 1.03 (0.57) | 1.11 (0.86) |
| Right rostral anterior cingulate cortex | 0.48 (3.04)  | -0.21 (6.93) | 0.06 (5.49)  | 0.41 (4.98)  | -0.47 (4.02) | 0.62 (6.64)  | 0.55 (5.61)  | 2.48 (1.71) | 4.67 (4.98) | 3.95 (3.68) | 4.14 (2.60) | 3.42 (1.97) | 5.18 (3.99) | 4.10 (3.73) |
| Right rostral middle frontal gyrus      | -0.15 (2.18) | -0.12 (1.95) | -0.01 (2.31) | -0.50 (2.17) | -0.78 (2.02) | -0.38 (2.08) | -0.01 (1.95) | 1.53 (1.51) | 1.46 (1.24) | 1.73 (1.46) | 1.62 (1.48) | 1.53 (1.50) | 1.62 (1.29) | 1.49 (1.20) |
| Right superior frontal gyrus            | 0.03 (0.90)  | 0.02 (1.43)  | 0.04 (1.34)  | 0.17 (0.84)  | -0.17 (0.98) | 0.14 (0.98)  | 0.09 (0.94)  | 0.69 (0.55) | 0.88 (1.10) | 0.96 (0.89) | 0.65 (0.53) | 0.78 (0.59) | 0.74 (0.62) | 0.74 (0.56) |
| Right superior parietal cortex          | 0.61 (1.25)  | 0.52 (1.33)  | 0.80 (1.47)  | 0.02 (2.11)  | 0.52 (1.34)  | -0.33 (0.88) | 0.59 (1.40)  | 0.94 (1.00) | 1.05 (0.93) | 1.13 (1.22) | 1.47 (1.47) | 1.07 (0.93) | 0.80 (0.46) | 1.09 (1.02) |
| Right superior temporal gyrus           | -0.24 (1.16) | -0.59 (1.07) | -0.07 (0.77) | 0.17 (1.49)  | 0.13 (1.20)  | -0.48 (1.16) | 0.08 (1.34)  | 0.88 (0.76) | 1.02 (0.64) | 0.63 (0.43) | 1.22 (0.82) | 0.88 (0.80) | 0.99 (0.73) | 1.11 (0.71) |
| Right supramarginal gyrus               | 0.12 (1.01)  | -0.60 (1.53) | -0.78 (1.49) | -0.13 (1.61) | -0.33 (0.85) | -0.18 (1.26) | -0.30 (1.09) | 0.76 (0.64) | 1.19 (1.10) | 1.40 (0.88) | 1.37 (0.79) | 0.74 (0.51) | 1.00 (0.74) | 0.94 (0.60) |
| Right frontal pole                      | -1.02 (4.80) | -1.85 (7.20) | 0.10 (6.10)  | 0.78 (6.79)  | 0.18 (4.79)  | -2.26 (7.12) | -2.17 (5.41) | 3.65 (3.16) | 5.67 (4.61) | 3.51 (4.90) | 5.05 (4.42) | 3.57 (3.06) | 5.29 (5.13) | 4.75 (3.19) |
| Right temporal pole                     | -2.13 (5.95) | -1.96 (7.59) | -2.44 (4.66) | 0.17 (5.82)  | -2.37 (5.70) | -2.07 (7.45) | -3.54 (6.17) | 5.22 (3.35) | 5.34 (5.60) | 4.03 (3.28) | 4.50 (3.50) | 5.54 (2.39) | 5.30 (5.49) | 5.39 (4.53) |
| Right transverse temporal gyrus         | -0.29 (4.37) | 1.81 (4.92)  | 0.89 (3.79)  | 0.90 (3.30)  | 0.75 (3.58)  | -0.91 (5.45) | -0.87 (3.74) | 3.30 (2.75) | 4.09 (3.15) | 3.15 (2.16) | 2.80 (1.84) | 2.83 (2.21) | 4.03 (3.64) | 2.87 (2.45) |
| Right insula                            | -1.19 (6.01) | 0.41 (7.13)  | -2.42 (5.68) | -2.66 (8.88) | -2.56 (7.52) | 3.57 (7.72)  | 1.87 (5.10)  | 4.27 (4.26) | 5.20 (4.71) | 4.21 (4.42) | 6.96 (5.90) | 6.08 (4.91) | 6.01 (5.89) | 4.09 (3.44) |
| <b>Local cortical thickness (mm)</b>    |              |              |              |              |              |              |              |             |             |             |             |             |             |             |
| Left banks superior temporal sulcus     | 0.08 (3.51)  | 0.13 (2.20)  | 0.02 (2.22)  | -0.48 (2.73) | -0.34 (2.79) | 0.37 (2.18)  | 0.86 (2.96)  | 2.80 (2.00) | 1.60 (1.46) | 1.70 (1.35) | 2.18 (1.63) | 2.30 (1.51) | 1.67 (1.38) | 2.56 (1.60) |
| Left caudal anterior cingulate cortex   | -1.07 (6.03) | -1.62 (5.22) | -1.56 (6.03) | -2.07 (5.21) | -1.73 (6.20) | -0.87 (6.71) | -1.25 (7.10) | 4.50 (4.00) | 3.91 (3.70) | 4.13 (4.56) | 4.46 (3.23) | 5.17 (3.63) | 5.31 (3.96) | 5.16 (4.87) |
| Left caudal middle frontal gyrus        | -0.68 (2.24) | -0.97 (2.55) | -0.98 (2.35) | -1.18 (2.41) | -1.02 (2.91) | -0.40 (2.28) | -0.49 (2.38) | 1.75 (1.50) | 2.22 (1.50) | 2.05 (1.43) | 2.13 (1.55) | 2.57 (1.60) | 1.80 (1.39) | 1.70 (1.69) |
| Left cuneus                             | 0.39 (2.73)  | 0.09 (2.74)  | -0.21 (2.19) | 0.27 (2.37)  | 0.13 (2.37)  | 0.46 (2.35)  | -0.04 (2.06) | 2.24 (1.50) | 2.37 (1.24) | 1.78 (1.20) | 1.96 (1.26) | 1.78 (1.50) | 1.99 (1.24) | 1.64 (1.16) |
| Left entorhinal cortex                  | 1.11 (4.42)  | 1.05 (5.50)  | 0.67 (3.41)  | 1.47 (5.08)  | 1.55 (4.19)  | -0.03 (7.17) | 0.35 (4.62)  | 3.60 (2.65) | 4.59 (2.99) | 2.69 (2.09) | 4.22 (3.02) | 3.43 (2.75) | 5.60 (4.24) | 3.69 (2.63) |
| Left fusiform gyrus                     | 0.57 (2.06)  | 0.68 (2.06)  | 0.69 (2.05)  | 0.74 (2.18)  | 0.73 (1.97)  | 0.70 (2.35)  | 0.66 (2.07)  | 1.62 (1.35) | 1.46 (1.57) | 1.74 (1.22) | 1.80 (1.37) | 1.60 (1.33) | 1.86 (1.53) | 1.55 (1.48) |
| Left inferior parietal cortex           | 0.13 (1.65)  | 0.51 (1.32)  | 0.38 (1.28)  | -0.05 (1.66) | 0.10 (1.81)  | 0.64 (1.30)  | 0.59 (1.39)  | 1.28 (1.00) | 1.14 (0.80) | 1.04 (0.80) | 1.47 (0.69) | 1.58 (0.80) | 1.05 (0.98) | 0.94 (1.17) |
| Left inferior temporal gyrus            | 0.56 (2.73)  | 1.31 (2.36)  | 0.91 (2.35)  | 0.92 (2.75)  | 0.82 (2.32)  | 1.44 (2.41)  | 1.09 (2.09)  | 2.27 (1.52) | 2.05 (1.71) | 2.10 (1.31) | 2.13 (1.90) | 1.76 (1.68) | 2.33 (1.49) | 1.84 (1.42) |
| Left isthmus cingulate cortex           | 0.56 (3.99)  | 1.30 (3.06)  | 0.73 (2.97)  | -0.63 (2.14) | 0.08 (2.02)  | 1.05 (3.24)  | 0.65 (3.60)  | 2.82 (2.79) | 2.47 (2.15) | 2.32 (1.90) | 1.72 (1.37) | 1.44 (1.37) | 2.63 (2.07) | 2.36 (2.72) |
| Left lateral occipital cortex           | -0.36 (1.00) | -0.86 (1.73) | -0.55 (1.10) | -0.58 (1.38) | -0.39 (1.04) | -0.17 (1.57) | 0.01 (1.27)  | 0.82 (0.65) | 1.50 (1.17) | 0.96 (0.74) | 1.23 (0.80) | 0.81 (0.74) | 1.23 (0.95) | 0.93 (0.83) |
| Left lateral orbitofrontal cortex       | 0.78 (2.32)  | 0.58 (2.31)  | 0.36 (2.41)  | 0.59 (2.41)  | 0.58 (2.65)  | 1.22 (2.41)  | 1.13 (2.42)  | 1.91 (1.46) | 1.84 (1.45) | 2.03 (1.25) | 2.10 (1.21) | 2.31 (1.30) | 2.10 (1.63) | 2.12 (1.55) |
| Left lingual gyrus                      | -1.31 (3.69) | -1.32 (2.53) | -1.61 (3.07) | -0.82 (2.25) | -1.11 (3.03) | -0.92 (2.74) | -1.57 (3.33) | 2.88 (2.57) | 2.24 (1.71) | 2.80 (1.95) | 1.81 (1.51) | 2.59 (1.82) | 2.34 (1.60) | 2.99 (2.05) |
| Left medial orbitofrontal cortex        | -1.02 (3.43) | -0.18 (3.81) | -1.35 (3.41) | -1.14 (3.96) | -1.61 (4.29) | -0.12 (3.08) | -0.50 (3.55) | 2.64 (2.34) | 2.66 (2.65) | 2.49 (2.64) | 2.69 (3.05) | 3.55 (2.78) | 2.14 (2.15) | 2.28 (2.71) |
| Left middle temporal gyrus              | 0.19 (2.43)  | 0.10 (1.65)  | 0.22 (2.15)  | 0.23 (2.31)  | 0.32 (2.25)  | 0.03 (2.58)  | 0.13 (3.15)  | 1.91 (1.43) | 1.24 (1.06) | 1.83 (1.04) | 1.89 (1.26) | 1.93 (1.09) | 1.75 (1.84) | 2.36 (1.99) |
| Left parahippocampal gyrus              | 0.55 (1.82)  | 0.19 (2.24)  | -0.11 (2.39) | -0.05 (1.47) | 0.47 (2.23)  | 0.35 (1.71)  | 0.47 (2.24)  | 1.53 (1.07) | 1.75 (1.33) | 1.61 (1.73) | 1.17 (0.85) | 1.87 (1.21) | 1.21 (1.23) | 1.52 (1.67) |

|                                         |              |              |              |              |              |              |              |             |             |             |             |             |             |             |
|-----------------------------------------|--------------|--------------|--------------|--------------|--------------|--------------|--------------|-------------|-------------|-------------|-------------|-------------|-------------|-------------|
| Left paracentral lobule                 | -0.17 (2.09) | -0.20 (2.79) | -0.33 (2.10) | -0.25 (2.30) | -0.01 (2.67) | -0.04 (2.35) | 0.33 (2.51)  | 1.75 (1.06) | 2.31 (1.46) | 1.65 (1.26) | 1.81 (1.36) | 2.21 (1.39) | 1.67 (1.60) | 2.18 (1.15) |
| Left pars opercularis                   | -0.50 (2.32) | 0.19 (1.75)  | -0.16 (2.34) | -0.23 (1.89) | -0.24 (2.38) | -0.15 (2.59) | -0.10 (2.11) | 1.93 (1.31) | 1.45 (0.92) | 1.62 (1.64) | 1.61 (0.92) | 1.80 (1.50) | 1.90 (1.69) | 1.65 (1.24) |
| Left pars orbitalis                     | -0.94 (3.02) | -0.90 (2.53) | -0.79 (2.84) | -0.82 (2.36) | -1.18 (2.67) | 0.22 (2.97)  | -0.02 (2.94) | 2.16 (2.26) | 2.17 (1.48) | 2.26 (1.82) | 1.87 (1.60) | 2.06 (2.03) | 2.39 (1.67) | 2.35 (1.66) |
| Left pars triangularis                  | -0.51 (2.35) | 0.43 (1.57)  | 0.20 (1.64)  | 0.27 (2.31)  | 0.10 (2.37)  | 0.48 (1.88)  | 0.66 (2.13)  | 1.66 (1.69) | 1.32 (0.90) | 1.30 (0.96) | 1.75 (1.46) | 1.91 (1.32) | 1.65 (0.93) | 1.81 (1.23) |
| Left pericalcarine cortex               | -0.61 (5.65) | -0.89 (5.09) | -1.06 (4.75) | -1.59 (3.60) | -1.23 (3.69) | -1.16 (4.97) | -2.15 (4.21) | 4.17 (3.71) | 3.77 (3.40) | 3.83 (2.85) | 2.95 (2.52) | 3.05 (2.31) | 4.04 (2.94) | 3.83 (2.65) |
| Left postcentral gyrus                  | -0.40 (2.19) | 0.03 (1.27)  | -0.40 (1.68) | -0.22 (1.80) | -0.17 (2.31) | 0.08 (1.34)  | -0.17 (2.09) | 1.91 (1.04) | 1.08 (0.61) | 1.51 (0.76) | 1.46 (1.02) | 1.97 (1.11) | 1.05 (0.79) | 1.60 (1.28) |
| Left posterior cingulate cortex         | -0.25 (2.58) | -0.24 (2.60) | 0.14 (2.47)  | -0.73 (2.78) | -0.14 (2.79) | -0.34 (2.27) | -0.14 (2.40) | 1.90 (1.68) | 2.14 (1.39) | 2.20 (0.98) | 2.25 (1.70) | 2.20 (1.63) | 1.70 (1.47) | 1.90 (1.40) |
| Left precentral gyrus                   | 0.06 (1.34)  | -0.06 (1.23) | -0.23 (1.44) | -0.15 (1.51) | 0.13 (1.87)  | 0.27 (1.58)  | 0.37 (1.84)  | 0.95 (0.92) | 0.97 (0.71) | 1.15 (0.86) | 1.30 (0.71) | 1.43 (1.16) | 1.23 (0.98) | 1.19 (1.42) |
| Left precuneus                          | -0.26 (1.52) | -0.03 (1.18) | -0.08 (1.49) | -0.68 (1.48) | -0.35 (1.50) | -0.22 (1.59) | -0.08 (1.52) | 1.10 (1.05) | 0.94 (0.67) | 1.03 (1.04) | 1.34 (0.87) | 1.18 (0.94) | 1.21 (1.00) | 0.94 (1.17) |
| Left rostral anterior cingulate cortex  | -1.06 (4.47) | -1.12 (4.26) | -0.74 (4.45) | 0.30 (3.23)  | 0.00 (4.55)  | -0.19 (4.71) | -0.64 (4.18) | 3.85 (2.32) | 3.39 (2.69) | 3.33 (2.93) | 2.51 (1.95) | 3.37 (2.93) | 3.67 (2.79) | 3.32 (2.48) |
| Left rostral middle frontal gyrus       | -0.59 (2.15) | -0.05 (2.04) | -0.43 (2.15) | -0.69 (2.14) | -0.91 (1.97) | -0.36 (2.27) | -0.51 (2.10) | 1.55 (1.55) | 1.62 (1.17) | 1.62 (1.42) | 1.63 (1.50) | 1.65 (1.36) | 1.45 (1.75) | 1.43 (1.58) |
| Left superior frontal gyrus             | -1.35 (2.47) | -1.26 (2.62) | -1.25 (2.38) | -1.24 (2.29) | -1.57 (2.70) | -0.87 (2.98) | -0.91 (2.79) | 1.65 (2.26) | 1.96 (2.11) | 1.75 (2.02) | 1.94 (1.69) | 2.25 (2.13) | 2.20 (2.12) | 1.74 (2.33) |
| Left superior parietal cortex           | -0.24 (1.56) | -0.39 (1.80) | -0.43 (1.38) | -0.33 (1.67) | -0.35 (1.91) | -0.36 (1.47) | -0.31 (1.55) | 1.24 (0.92) | 1.49 (1.02) | 1.12 (0.88) | 1.43 (0.86) | 1.51 (1.17) | 1.06 (1.05) | 1.17 (1.03) |
| Left superior temporal gyrus            | -0.15 (3.57) | -0.05 (2.59) | -0.19 (3.38) | -0.36 (2.75) | -0.33 (2.93) | 0.15 (2.82)  | 0.21 (3.11)  | 2.35 (2.62) | 1.64 (1.96) | 2.18 (2.52) | 1.85 (2.01) | 1.92 (2.18) | 1.82 (2.10) | 1.95 (2.38) |
| Left supramarginal gyrus                | 0.39 (2.61)  | 0.14 (1.32)  | 0.35 (1.85)  | -0.06 (1.92) | 0.46 (2.70)  | 0.43 (1.27)  | 0.67 (2.26)  | 2.25 (1.26) | 0.95 (0.89) | 1.46 (1.12) | 1.48 (1.16) | 2.10 (1.67) | 1.01 (0.84) | 1.74 (1.53) |
| Left frontal pole                       | 0.79 (4.65)  | -0.26 (4.16) | -0.44 (4.98) | 0.10 (4.64)  | -1.79 (9.02) | -0.49 (5.63) | -0.21 (6.36) | 3.85 (2.55) | 3.34 (2.35) | 3.70 (3.22) | 3.43 (2.99) | 5.86 (6.94) | 4.41 (3.35) | 4.66 (4.17) |
| Left temporal pole                      | 0.29 (3.87)  | 0.51 (4.26)  | -0.19 (4.51) | 0.82 (3.25)  | 0.37 (4.35)  | 0.87 (3.87)  | 0.81 (4.29)  | 3.01 (2.31) | 3.38 (2.50) | 3.50 (2.71) | 2.66 (1.93) | 3.41 (2.58) | 3.11 (2.34) | 3.43 (2.56) |
| Left transverse temporal gyrus          | -0.09 (3.48) | 0.20 (2.54)  | 0.29 (3.01)  | 0.35 (2.42)  | 0.46 (3.09)  | 0.00 (2.57)  | 0.02 (3.30)  | 2.78 (1.98) | 1.95 (1.57) | 2.35 (1.81) | 1.99 (1.32) | 2.45 (1.84) | 1.98 (1.55) | 2.47 (2.09) |
| Left insula                             | -0.18 (3.05) | 0.74 (3.67)  | -0.06 (5.00) | 1.66 (4.54)  | 0.06 (3.92)  | 1.72 (4.10)  | 0.38 (3.50)  | 2.38 (1.81) | 2.70 (2.51) | 4.07 (2.70) | 3.94 (2.65) | 2.93 (2.50) | 3.44 (2.71) | 2.75 (2.09) |
| Right banks superior temporal sulcus    | -0.21 (2.39) | 0.58 (2.05)  | 0.24 (2.99)  | 0.33 (2.67)  | -0.04 (2.94) | 1.08 (2.58)  | 0.52 (2.52)  | 1.90 (1.38) | 1.59 (1.36) | 1.84 (2.32) | 2.20 (1.45) | 1.95 (2.15) | 2.22 (1.64) | 1.89 (1.67) |
| Right caudal anterior cingulate cortex  | -2.29 (4.69) | -1.91 (4.84) | -1.84 (4.72) | -0.56 (5.14) | -1.59 (4.85) | -2.28 (5.09) | -2.84 (4.58) | 4.11 (3.09) | 3.60 (3.68) | 3.81 (3.24) | 3.62 (3.57) | 3.73 (3.38) | 4.19 (3.56) | 4.40 (2.99) |
| Right caudal middle frontal gyrus       | -1.11 (3.78) | -1.18 (3.23) | -0.96 (3.57) | -0.85 (2.82) | -1.33 (3.67) | -0.63 (2.59) | -1.23 (3.49) | 2.88 (2.60) | 2.54 (2.24) | 2.76 (2.36) | 2.36 (1.68) | 3.05 (2.33) | 1.82 (1.89) | 2.93 (2.16) |
| Right cuneus                            | -0.83 (2.50) | -0.86 (2.59) | -1.09 (2.62) | -1.07 (1.98) | -0.77 (2.17) | -1.29 (1.70) | -1.00 (2.22) | 2.00 (1.64) | 2.12 (1.65) | 2.12 (1.82) | 1.91 (1.12) | 1.89 (1.24) | 1.73 (1.21) | 2.12 (1.10) |
| Right entorhinal cortex                 | -0.72 (6.66) | 1.63 (6.55)  | 0.34 (6.41)  | -0.27 (5.29) | 0.68 (5.73)  | -0.51 (6.06) | -0.07 (6.48) | 5.38 (3.74) | 4.91 (4.48) | 4.87 (3.99) | 4.09 (3.20) | 4.48 (3.45) | 4.51 (3.92) | 5.22 (3.59) |
| Right fusiform gyrus                    | 0.15 (2.85)  | 0.13 (2.27)  | 0.24 (2.41)  | -0.05 (3.13) | 0.11 (2.76)  | 0.45 (2.50)  | 0.41 (2.55)  | 2.09 (1.87) | 1.69 (1.47) | 1.75 (1.61) | 2.35 (1.98) | 2.12 (1.68) | 1.85 (1.69) | 1.88 (1.71) |
| Right inferior parietal cortex          | -0.05 (1.88) | 0.34 (1.76)  | -0.02 (1.86) | 0.15 (2.18)  | -0.19 (2.15) | 0.81 (1.90)  | 0.49 (2.03)  | 1.47 (1.12) | 1.41 (1.04) | 1.42 (1.14) | 1.66 (1.36) | 1.58 (1.41) | 1.27 (1.61) | 1.47 (1.43) |
| Right inferior temporal gyrus           | 0.33 (2.56)  | 0.25 (2.74)  | 0.29 (2.63)  | 0.35 (3.17)  | -0.19 (3.09) | 0.37 (2.56)  | 0.28 (2.22)  | 2.00 (1.55) | 2.05 (1.76) | 2.01 (1.64) | 2.59 (1.74) | 2.29 (1.99) | 2.06 (1.47) | 1.70 (1.39) |
| Right isthmus cingulate cortex          | 0.19 (3.27)  | -0.34 (2.18) | 0.10 (2.76)  | 0.81 (2.57)  | 0.84 (3.15)  | -0.06 (2.31) | 0.10 (3.27)  | 2.47 (2.06) | 1.74 (1.29) | 2.23 (1.53) | 2.09 (1.63) | 2.49 (2.02) | 1.80 (1.37) | 2.27 (2.28) |
| Right lateral occipital cortex          | 0.22 (1.80)  | 0.47 (2.34)  | 0.28 (1.76)  | 0.79 (2.13)  | 0.44 (1.80)  | 1.20 (2.01)  | 0.79 (1.65)  | 1.20 (1.32) | 1.58 (1.74) | 1.06 (1.41) | 1.70 (1.45) | 1.22 (1.36) | 1.48 (1.80) | 1.06 (1.48) |
| Right lateral orbitofrontal cortex      | -0.27 (3.88) | -0.14 (3.47) | -0.80 (4.34) | -0.01 (3.10) | -0.42 (4.10) | 0.65 (2.57)  | -0.12 (3.29) | 3.22 (2.02) | 2.61 (2.20) | 3.51 (2.53) | 2.32 (1.96) | 3.15 (2.53) | 1.95 (1.74) | 2.35 (2.23) |
| Right lingual gyrus                     | -0.83 (2.80) | -0.86 (2.84) | -1.33 (2.53) | -0.67 (2.45) | -0.92 (2.37) | -0.89 (2.94) | -1.16 (2.95) | 2.18 (1.87) | 2.29 (1.80) | 2.31 (1.61) | 2.04 (1.42) | 2.05 (1.43) | 2.43 (1.79) | 2.37 (2.04) |
| Right medial orbitofrontal cortex       | -0.70 (3.64) | -0.15 (2.45) | -0.67 (3.01) | -0.75 (3.77) | -1.66 (3.05) | 0.93 (3.12)  | -0.34 (2.57) | 2.63 (2.53) | 2.11 (1.13) | 2.25 (2.03) | 2.99 (2.31) | 2.88 (1.85) | 2.51 (1.98) | 2.03 (1.51) |
| Right middle temporal gyrus             | 0.32 (2.00)  | 0.39 (2.17)  | 0.48 (2.30)  | 0.09 (2.61)  | -0.41 (2.94) | 1.12 (2.21)  | 0.21 (2.68)  | 1.60 (1.17) | 1.70 (1.34) | 1.82 (1.42) | 2.06 (1.51) | 2.39 (1.65) | 2.12 (1.19) | 2.06 (1.63) |
| Right parahippocampal gyrus             | 0.62 (2.55)  | 0.83 (2.06)  | 0.68 (2.58)  | 0.12 (2.23)  | 0.62 (2.69)  | -0.01 (2.54) | 0.38 (2.71)  | 2.02 (1.60) | 1.84 (1.17) | 2.24 (1.34) | 1.64 (1.45) | 2.00 (1.83) | 2.09 (1.34) | 2.22 (1.50) |
| Right paracentral lobule                | -0.52 (2.74) | -0.40 (2.55) | -0.69 (2.91) | -0.73 (2.28) | -0.51 (2.76) | -0.33 (2.22) | -0.51 (2.45) | 1.83 (2.05) | 1.57 (2.01) | 1.97 (2.19) | 1.79 (1.54) | 1.82 (2.09) | 1.63 (1.48) | 1.66 (1.83) |
| Right pars opercularis                  | -0.35 (2.13) | -0.32 (2.29) | -0.35 (2.21) | 0.26 (1.64)  | -0.50 (1.83) | 0.42 (1.92)  | -0.34 (1.89) | 1.84 (1.02) | 1.51 (1.71) | 1.84 (1.20) | 1.13 (1.19) | 1.33 (1.32) | 1.45 (1.28) | 1.38 (1.29) |
| Right pars orbitalis                    | 0.51 (2.85)  | 0.08 (2.50)  | 0.29 (2.66)  | -0.08 (2.17) | -0.28 (2.67) | 1.13 (3.07)  | 1.00 (2.56)  | 2.13 (1.88) | 1.97 (1.45) | 2.05 (1.64) | 1.73 (1.23) | 2.04 (1.67) | 2.36 (2.20) | 2.20 (1.56) |
| Right pars triangularis                 | -0.37 (3.22) | 0.05 (2.68)  | -0.07 (3.08) | 0.12 (2.44)  | -0.30 (3.00) | 0.33 (2.60)  | 0.13 (2.80)  | 2.33 (2.18) | 2.21 (1.40) | 2.53 (1.64) | 1.66 (1.73) | 2.30 (1.86) | 2.07 (1.53) | 2.21 (1.63) |
| Right pericalcarine cortex              | -1.32 (4.40) | -1.23 (4.13) | -1.23 (5.02) | -1.27 (4.35) | -0.96 (4.64) | -1.27 (4.60) | -0.59 (4.56) | 3.01 (3.40) | 3.37 (2.56) | 3.59 (3.62) | 3.37 (2.92) | 3.46 (3.11) | 3.70 (2.88) | 2.98 (3.41) |
| Right postcentral gyrus                 | 0.06 (1.83)  | 0.63 (1.45)  | 0.30 (1.70)  | 0.45 (1.65)  | 0.22 (1.85)  | 0.35 (1.58)  | -0.02 (1.75) | 1.54 (0.92) | 1.28 (0.89) | 1.46 (0.84) | 1.34 (1.00) | 1.45 (1.11) | 1.31 (0.89) | 1.37 (1.03) |
| Right posterior cingulate cortex        | 0.07 (2.55)  | 0.02 (2.36)  | 0.57 (2.58)  | 0.45 (2.82)  | 0.76 (2.22)  | 0.25 (2.53)  | 0.44 (2.67)  | 2.10 (1.35) | 1.99 (1.16) | 2.29 (1.19) | 2.28 (1.63) | 1.80 (1.44) | 1.88 (1.64) | 2.26 (1.36) |
| Right precentral gyrus                  | -0.08 (2.80) | -0.09 (2.24) | -0.05 (2.40) | 0.04 (2.13)  | -0.23 (2.53) | 0.45 (2.38)  | -0.18 (2.67) | 2.40 (1.31) | 1.39 (1.72) | 1.79 (1.53) | 1.63 (1.30) | 1.93 (1.58) | 1.84 (1.51) | 2.18 (1.45) |
| Right precuneus                         | 0.02 (2.01)  | 0.68 (1.95)  | 0.13 (2.05)  | 0.21 (1.59)  | -0.09 (1.67) | 0.21 (1.53)  | -0.05 (1.82) | 1.47 (1.31) | 1.38 (1.50) | 1.48 (1.38) | 1.18 (1.04) | 1.29 (1.01) | 1.28 (0.81) | 1.40 (1.10) |
| Right rostral anterior cingulate cortex | -0.16 (2.66) | 0.08 (2.99)  | -0.39 (3.28) | -0.30 (3.30) | -0.10 (3.32) | 0.37 (3.00)  | -0.55 (2.99) | 1.72 (1.99) | 2.41 (1.66) | 2.53 (2.03) | 2.41 (2.20) | 2.41 (2.20) | 2.50 (1.58) | 2.46 (1.68) |
| Right rostral middle frontal gyrus      | -1.03 (3.75) | -0.99 (3.14) | -0.95 (3.47) | -0.74 (2.53) | -1.40 (3.14) | -0.35 (2.67) | -0.93 (3.24) | 2.71 (2.71) | 2.47 (2.10) | 2.63 (2.36) | 2.07 (1.55) | 2.51 (2.29) | 2.02 (1.71) | 2.33 (2.38) |

|                                                      |              |              |              |              |              |              |              |             |             |             |             |             |             |             |
|------------------------------------------------------|--------------|--------------|--------------|--------------|--------------|--------------|--------------|-------------|-------------|-------------|-------------|-------------|-------------|-------------|
| Right superior frontal gyrus                         | -1.00 (3.15) | -0.89 (2.66) | -0.82 (2.86) | -1.06 (2.13) | -1.55 (3.09) | -0.18 (2.35) | -0.85 (2.87) | 2.48 (2.10) | 1.89 (2.04) | 2.30 (1.80) | 1.82 (1.49) | 2.73 (2.05) | 1.72 (1.56) | 2.31 (1.82) |
| Right superior parietal cortex                       | -0.23 (2.07) | 0.22 (2.06)  | -0.22 (1.98) | -0.33 (1.94) | -0.65 (1.78) | 0.54 (2.01)  | -0.05 (2.45) | 1.66 (1.18) | 1.76 (0.99) | 1.59 (1.13) | 1.48 (1.24) | 1.54 (1.04) | 1.67 (1.18) | 1.58 (1.83) |
| Right superior temporal gyrus                        | -0.65 (2.22) | -0.41 (1.99) | -0.70 (1.88) | -0.62 (1.92) | -1.02 (2.19) | 0.17 (1.74)  | -0.29 (2.03) | 1.64 (1.58) | 1.51 (1.31) | 1.49 (1.29) | 1.59 (1.18) | 1.65 (1.73) | 1.40 (1.00) | 1.49 (1.35) |
| Right supramarginal gyrus                            | -0.27 (1.88) | 0.14 (1.39)  | -0.12 (1.49) | -0.29 (1.77) | -0.51 (1.90) | 0.65 (1.85)  | 0.16 (2.02)  | 1.61 (0.92) | 1.21 (0.64) | 1.10 (0.97) | 1.46 (0.99) | 1.51 (1.20) | 1.36 (1.38) | 1.74 (0.94) |
| Right frontal pole                                   | 1.96 (5.21)  | 0.42 (4.88)  | 0.86 (4.96)  | 0.68 (5.28)  | -2.00 (9.00) | 0.21 (3.61)  | 0.53 (4.38)  | 3.70 (4.07) | 3.12 (3.69) | 3.44 (3.58) | 4.20 (3.10) | 5.76 (7.07) | 2.46 (2.57) | 3.37 (2.72) |
| Right temporal pole                                  | 2.38 (5.73)  | 2.80 (6.15)  | 2.35 (6.69)  | 2.04 (6.54)  | 1.88 (7.01)  | 2.62 (6.38)  | 2.71 (6.59)  | 3.23 (5.27) | 4.31 (5.13) | 3.94 (5.84) | 4.86 (4.69) | 4.19 (5.85) | 4.25 (5.36) | 3.88 (5.93) |
| Right transverse temporal gyrus                      | -0.69 (3.51) | -1.20 (4.03) | -1.48 (3.91) | -1.55 (3.57) | -1.43 (3.87) | -0.97 (3.52) | -1.03 (4.05) | 2.40 (2.58) | 2.90 (2.97) | 2.96 (2.87) | 3.08 (2.27) | 2.80 (2.96) | 2.82 (2.21) | 2.92 (2.91) |
| Right insula                                         | 0.76 (3.68)  | 0.62 (3.28)  | 1.16 (3.49)  | 1.69 (4.13)  | 1.19 (4.11)  | -1.06 (4.89) | -1.02 (4.51) | 2.64 (2.60) | 2.50 (2.12) | 2.90 (2.16) | 3.43 (2.74) | 3.06 (2.90) | 3.49 (3.48) | 3.67 (2.66) |
| <b>Global brain measures</b>                         |              |              |              |              |              |              |              |             |             |             |             |             |             |             |
| Left total cortical volume (ml)                      | -0.31 (1.53) | -0.23 (1.25) | -0.32 (1.40) | -0.43 (1.44) | -0.47 (1.56) | -0.06 (1.38) | 0.01 (1.48)  | 1.09 (1.08) | 0.90 (0.86) | 0.92 (1.09) | 1.13 (0.95) | 1.22 (1.04) | 1.07 (0.83) | 1.07 (0.99) |
| Right total cortical volume (ml)                     | -0.31 (1.99) | -0.24 (1.64) | -0.29 (1.75) | -0.30 (1.62) | -0.68 (1.88) | 0.10 (1.70)  | -0.19 (1.88) | 1.43 (1.37) | 1.03 (1.27) | 1.14 (1.33) | 1.23 (1.05) | 1.29 (1.51) | 1.06 (1.30) | 1.29 (1.34) |
| Left total cortical white matter (ml)                | 0.12 (1.02)  | 0.12 (0.69)  | 0.33 (0.78)  | 0.17 (0.88)  | 0.23 (1.10)  | 0.13 (0.70)  | 0.41 (0.91)  | 0.73 (0.69) | 0.58 (0.35) | 0.68 (0.48) | 0.64 (0.61) | 0.90 (0.62) | 0.56 (0.42) | 0.75 (0.64) |
| Right total cortical white matter (ml)               | 0.15 (1.08)  | 0.21 (0.92)  | 0.35 (1.02)  | 0.34 (0.91)  | 0.21 (0.91)  | 0.27 (0.91)  | 0.31 (1.06)  | 0.79 (0.72) | 0.68 (0.64) | 0.80 (0.69) | 0.71 (0.64) | 0.70 (0.60) | 0.76 (0.54) | 0.78 (0.76) |
| Left total cortical surface area (cm <sup>2</sup> )  | -0.08 (0.63) | 0.00 (0.75)  | 0.03 (0.77)  | -0.13 (0.63) | -0.05 (0.66) | -0.15 (0.69) | 0.14 (0.69)  | 0.45 (0.43) | 0.52 (0.53) | 0.55 (0.52) | 0.41 (0.48) | 0.49 (0.43) | 0.48 (0.50) | 0.55 (0.42) |
| Right total cortical surface area (cm <sup>2</sup> ) | -0.06 (0.51) | -0.04 (0.64) | 0.00 (0.48)  | -0.04 (0.53) | -0.15 (0.47) | 0.02 (0.48)  | 0.09 (0.40)  | 0.42 (0.27) | 0.50 (0.38) | 0.35 (0.33) | 0.41 (0.32) | 0.36 (0.33) | 0.38 (0.29) | 0.29 (0.27) |
| Left mean cortical thickness (mm)                    | -0.23 (1.15) | -0.10 (0.75) | -0.24 (0.93) | -0.23 (1.04) | -0.24 (1.18) | 0.09 (1.09)  | 0.02 (1.11)  | 0.88 (0.75) | 0.60 (0.44) | 0.69 (0.64) | 0.87 (0.58) | 1.00 (0.64) | 0.92 (0.53) | 0.81 (0.73) |
| Right mean cortical thickness (mm)                   | -0.28 (1.67) | -0.08 (1.28) | -0.24 (1.46) | -0.13 (1.28) | -0.47 (1.53) | 0.25 (1.31)  | -0.16 (1.54) | 1.25 (1.10) | 0.90 (0.88) | 1.06 (0.99) | 1.04 (0.70) | 1.18 (1.05) | 1.00 (0.85) | 1.14 (1.01) |
| Left cerebellar white matter (ml)                    | -0.80 (4.58) | -0.90 (4.31) | -1.73 (4.56) | -1.45 (4.28) | -1.84 (4.19) | -0.77 (4.32) | -1.46 (4.07) | 3.28 (3.20) | 3.45 (2.60) | 3.65 (3.13) | 3.49 (2.76) | 3.48 (2.87) | 2.78 (3.32) | 3.05 (2.99) |
| Right cerebellar white matter (ml)                   | -0.62 (4.62) | 1.04 (3.54)  | -0.66 (3.35) | 0.02 (3.34)  | -0.74 (3.57) | -0.37 (4.25) | -1.12 (3.99) | 3.35 (3.12) | 3.03 (1.97) | 2.54 (2.20) | 2.56 (2.04) | 3.12 (1.71) | 2.79 (3.14) | 3.05 (2.71) |
| Left cerebellar gray matter (ml)                     | 0.01 (1.21)  | 0.02 (1.45)  | 0.03 (1.46)  | 0.07 (1.38)  | -0.06 (1.34) | 0.31 (1.27)  | 0.33 (1.31)  | 0.94 (0.72) | 1.03 (0.98) | 1.06 (0.97) | 0.99 (0.93) | 1.04 (0.80) | 0.88 (0.94) | 1.05 (0.81) |
| Right cerebellar gray matter (ml)                    | -0.03 (0.92) | -0.11 (1.24) | -0.06 (0.91) | 0.14 (1.16)  | -0.21 (1.24) | 0.05 (0.85)  | 0.32 (1.03)  | 0.72 (0.55) | 0.99 (0.71) | 0.67 (0.59) | 0.94 (0.65) | 1.00 (0.72) | 0.68 (0.48) | 0.85 (0.63) |
| Intracranial volume (ml)                             | 0.62 (2.06)  | -0.23 (3.42) | 0.83 (2.28)  | -0.49 (4.43) | -3.87 (6.58) | -0.02 (1.06) | 2.44 (4.31)  | 1.11 (1.82) | 1.55 (3.03) | 1.11 (2.15) | 2.03 (3.94) | 4.05 (6.46) | 0.73 (0.75) | 2.52 (4.26) |
| Total brain volume without ventricles (ml)           | -0.09 (0.75) | -0.05 (0.56) | -0.04 (0.66) | -0.09 (0.70) | -0.24 (0.88) | 0.10 (0.55)  | 0.10 (0.77)  | 0.67 (0.31) | 0.42 (0.37) | 0.57 (0.31) | 0.54 (0.43) | 0.68 (0.58) | 0.42 (0.35) | 0.54 (0.54) |

Abbreviations: PD=Average Percentage Difference; SD=standard deviation; Orig = Original scan; FS df =FreeSurfer defacing; FSL df =FSL defacing; FM = Face Masking; Suffix 1 and 2 indicate first and second scan respectively, i.e. test-retest.



**Table S8. Effects of de-identification on test-retest reliability in young adults: Pearson's correlation coefficients and intra-class correlation coefficients**

| Brain metric                          | Pearson's r   |               |                |                   |                 |           |             | ICC (95% CI)     |                  |                  |                   |                  |                  |                  |
|---------------------------------------|---------------|---------------|----------------|-------------------|-----------------|-----------|-------------|------------------|------------------|------------------|-------------------|------------------|------------------|------------------|
|                                       | Orig1 - Orig2 | Orig1 - Orig2 | Orig1 - FS df2 | FSL df1 - FSL df2 | Orig1 - FSL df2 | FM1 - FM2 | Orig1 - FM2 | Orig1 - Orig2    | Orig1 - Orig2    | Orig1 - FS df2   | FSL df1 - FSL df2 | Orig1 - FSL df2  | FM1 - FM2        | Orig1 - FM2      |
| <b>Subcortical volume (ml)</b>        |               |               |                |                   |                 |           |             |                  |                  |                  |                   |                  |                  |                  |
| Left thalamus                         | 0.96          | 0.96          | 0.96           | 0.96              | 0.98            | 0.97      | 0.98        | 0.97 (0.90-0.99) | 0.95 (0.86-0.98) | 0.95 (0.87-0.98) | 0.96 (0.89-0.99)  | 0.98 (0.94-0.99) | 0.97 (0.91-0.99) | 0.98 (0.95-0.99) |
| Left caudatus                         | 0.97          | 0.98          | 0.98           | 0.98              | 0.98            | 0.99      | 0.98        | 0.96 (0.89-0.99) | 0.98 (0.94-0.99) | 0.97 (0.91-0.99) | 0.98 (0.96-0.99)  | 0.98 (0.94-0.99) | 0.99 (0.96-1.00) | 0.97 (0.88-0.99) |
| Left putamen                          | 0.97          | 0.97          | 0.96           | 0.97              | 0.96            | 0.98      | 0.96        | 0.97 (0.91-0.99) | 0.97 (0.93-0.99) | 0.96 (0.88-0.98) | 0.97 (0.92-0.99)  | 0.96 (0.88-0.98) | 0.98 (0.94-0.99) | 0.96 (0.89-0.99) |
| Left pallidum                         | 0.90          | 0.87          | 0.9            | 0.94              | 0.93            | 0.84      | 0.87        | 0.90 (0.73-0.96) | 0.87 (0.66-0.95) | 0.91 (0.75-0.97) | 0.93 (0.82-0.98)  | 0.93 (0.81-0.98) | 0.84 (0.61-0.94) | 0.88 (0.69-0.96) |
| Left hippocampus                      | 0.97          | 0.94          | 0.97           | 0.96              | 0.96            | 0.96      | 0.96        | 0.97 (0.93-0.99) | 0.94 (0.84-0.98) | 0.96 (0.90-0.99) | 0.96 (0.89-0.99)  | 0.96 (0.90-0.99) | 0.96 (0.88-0.98) | 0.95 (0.85-0.98) |
| Left amygdala                         | 0.93          | 0.91          | 0.93           | 0.79              | 0.85            | 0.89      | 0.88        | 0.93 (0.80-0.97) | 0.91 (0.77-0.97) | 0.93 (0.82-0.98) | 0.80 (0.51-0.93)  | 0.85 (0.63-0.95) | 0.89 (0.72-0.96) | 0.88 (0.69-0.96) |
| Left accumbens                        | 0.87          | 0.96          | 0.91           | 0.9               | 0.93            | 0.84      | 0.87        | 0.85 (0.62-0.94) | 0.96 (0.88-0.98) | 0.90 (0.74-0.96) | 0.90 (0.74-0.96)  | 0.93 (0.81-0.97) | 0.85 (0.61-0.94) | 0.85 (0.62-0.94) |
| Right thalamus                        | 0.97          | 0.96          | 0.96           | 0.97              | 0.96            | 0.96      | 0.96        | 0.97 (0.91-0.99) | 0.95 (0.85-0.98) | 0.95 (0.83-0.98) | 0.96 (0.84-0.99)  | 0.96 (0.87-0.99) | 0.94 (0.82-0.98) | 0.95 (0.84-0.98) |
| Right caudatus                        | 0.97          | 0.95          | 0.96           | 0.97              | 0.99            | 0.98      | 0.98        | 0.97 (0.92-0.99) | 0.95 (0.86-0.98) | 0.96 (0.88-0.98) | 0.96 (0.90-0.99)  | 0.98 (0.91-0.99) | 0.97 (0.85-0.99) | 0.97 (0.90-0.99) |
| Right putamen                         | 0.99          | 0.99          | 0.99           | 0.99              | 0.99            | 0.99      | 0.99        | 0.99 (0.98-1.00) | 0.99 (0.97-1.00) | 0.99 (0.97-1.00) | 0.99 (0.96-1.00)  | 0.99 (0.97-1.00) | 0.99 (0.98-1.00) | 0.99 (0.95-1.00) |
| Right pallidum                        | 0.94          | 0.93          | 0.9            | 0.95              | 0.95            | 0.88      | 0.86        | 0.94 (0.83-0.98) | 0.93 (0.81-0.97) | 0.91 (0.75-0.97) | 0.95 (0.86-0.98)  | 0.94 (0.83-0.98) | 0.88 (0.71-0.96) | 0.87 (0.66-0.95) |
| Right hippocampus                     | 0.98          | 0.93          | 0.96           | 0.95              | 0.96            | 0.94      | 0.96        | 0.97 (0.90-0.99) | 0.93 (0.82-0.98) | 0.96 (0.89-0.99) | 0.96 (0.88-0.98)  | 0.96 (0.90-0.99) | 0.93 (0.82-0.98) | 0.95 (0.87-0.98) |
| Right amygdala                        | 0.86          | 0.87          | 0.87           | 0.83              | 0.86            | 0.79      | 0.83        | 0.86 (0.66-0.95) | 0.87 (0.68-0.95) | 0.88 (0.68-0.96) | 0.82 (0.57-0.93)  | 0.86 (0.65-0.95) | 0.79 (0.50-0.92) | 0.83 (0.58-0.94) |
| Right accumbens                       | 0.86          | 0.88          | 0.86           | 0.94              | 0.9             | 0.93      | 0.88        | 0.86 (0.65-0.95) | 0.88 (0.69-0.96) | 0.86 (0.65-0.95) | 0.94 (0.84-0.98)  | 0.91 (0.76-0.97) | 0.93 (0.83-0.98) | 0.89 (0.71-0.96) |
| <b>Ventricular volume (ml)</b>        |               |               |                |                   |                 |           |             |                  |                  |                  |                   |                  |                  |                  |
| Third ventricle                       | 0.99          | 0.99          | 0.99           | 0.99              | 0.99            | 0.99      | 0.99        | 0.99 (0.98-1.00) | 0.99 (0.98-1.00) | 0.99 (0.98-1.00) | 0.99 (0.97-1.00)  | 0.99 (0.98-1.00) | 0.99 (0.97-1.00) | 0.99 (0.97-1.00) |
| Left lateral ventricle                | 1.00          | 1             | 1              | 1                 | 1               | 1         | 1           | 1.00 (1.00-1.00) | 1.00 (1.00-1.00) | 1.00 (1.00-1.00) | 1.00 (1.00-1.00)  | 1.00 (1.00-1.00) | 1.00 (1.00-1.00) | 1.00 (1.00-1.00) |
| Left inferior lateral ventricle       | 0.98          | 0.97          | 0.97           | 0.97              | 0.96            | 0.97      | 0.97        | 0.98 (0.95-0.99) | 0.97 (0.91-0.99) | 0.96 (0.89-0.99) | 0.97 (0.92-0.99)  | 0.96 (0.90-0.99) | 0.97 (0.91-0.99) | 0.97 (0.92-0.99) |
| Right lateral ventricle               | 1.00          | 1             | 1              | 1                 | 1               | 1         | 1           | 1.00 (1.00-1.00) | 1.00 (1.00-1.00) | 1.00 (1.00-1.00) | 1.00 (1.00-1.00)  | 1.00 (1.00-1.00) | 1.00 (1.00-1.00) | 1.00 (1.00-1.00) |
| Right inferior lateral ventricle      | 0.97          | 0.98          | 0.98           | 0.98              | 0.97            | 0.98      | 0.99        | 0.97 (0.92-0.99) | 0.98 (0.96-0.99) | 0.98 (0.95-0.99) | 0.98 (0.94-0.99)  | 0.97 (0.93-0.99) | 0.98 (0.94-0.99) | 0.99 (0.97-1.00) |
| <b>Local cortical volume (ml)</b>     |               |               |                |                   |                 |           |             |                  |                  |                  |                   |                  |                  |                  |
| Left banks superior temporal sulcus   | 0.95          | 0.98          | 0.97           | 0.98              | 0.96            | 0.97      | 0.96        | 0.95 (0.87-0.98) | 0.97 (0.93-0.99) | 0.97 (0.92-0.99) | 0.97 (0.93-0.99)  | 0.95 (0.87-0.98) | 0.97 (0.91-0.99) | 0.96 (0.90-0.99) |
| Left caudal anterior cingulate cortex | 0.98          | 0.98          | 0.98           | 0.98              | 0.98            | 0.99      | 0.99        | 0.97 (0.89-0.99) | 0.98 (0.95-0.99) | 0.98 (0.94-0.99) | 0.98 (0.93-0.99)  | 0.98 (0.94-0.99) | 0.99 (0.97-1.00) | 0.99 (0.96-1.00) |
| Left caudal middle frontal gyrus      | 0.98          | 0.98          | 0.97           | 0.98              | 0.97            | 0.99      | 0.97        | 0.98 (0.94-0.99) | 0.97 (0.93-0.99) | 0.96 (0.90-0.99) | 0.97 (0.92-0.99)  | 0.96 (0.90-0.99) | 0.98 (0.96-0.99) | 0.97 (0.93-0.99) |
| Left cuneus                           | 0.97          | 0.98          | 0.98           | 0.99              | 0.99            | 0.99      | 0.98        | 0.97 (0.92-0.99) | 0.98 (0.94-0.99) | 0.98 (0.94-0.99) | 0.99 (0.96-1.00)  | 0.99 (0.96-1.00) | 0.99 (0.96-1.00) | 0.98 (0.95-0.99) |
| Left entorhinal cortex                | 0.82          | 0.86          | 0.85           | 0.67              | 0.77            | 0.85      | 0.8         | 0.81 (0.53-0.93) | 0.86 (0.64-0.95) | 0.86 (0.64-0.95) | 0.68 (0.29-0.88)  | 0.77 (0.46-0.92) | 0.86 (0.64-0.95) | 0.80 (0.52-0.93) |
| Left fusiform gyrus                   | 0.97          | 0.95          | 0.94           | 0.95              | 0.95            | 0.95      | 0.96        | 0.96 (0.90-0.99) | 0.95 (0.85-0.98) | 0.94 (0.84-0.98) | 0.95 (0.85-0.98)  | 0.95 (0.86-0.98) | 0.94 (0.81-0.98) | 0.95 (0.86-0.98) |
| Left inferior parietal cortex         | 0.99          | 0.99          | 0.99           | 0.98              | 0.99            | 0.99      | 0.99        | 0.99 (0.96-1.00) | 0.99 (0.97-1.00) | 0.99 (0.98-1.00) | 0.98 (0.95-0.99)  | 0.99 (0.96-1.00) | 0.99 (0.96-1.00) | 0.99 (0.98-1.00) |
| Left inferior temporal gyrus          | 0.95          | 0.96          | 0.96           | 0.96              | 0.97            | 0.97      | 0.98        | 0.95 (0.87-0.98) | 0.96 (0.88-0.99) | 0.96 (0.90-0.99) | 0.96 (0.90-0.99)  | 0.96 (0.90-0.99) | 0.97 (0.91-0.99) | 0.97 (0.92-0.99) |
| Left isthmus cingulate cortex         | 0.96          | 0.99          | 0.97           | 0.97              | 0.95            | 0.95      | 0.94        | 0.96 (0.89-0.99) | 0.98 (0.96-0.99) | 0.97 (0.92-0.99) | 0.97 (0.91-0.99)  | 0.95 (0.88-0.98) | 0.96 (0.88-0.98) | 0.94 (0.84-0.98) |
| Left lateral occipital cortex         | 1.00          | 0.99          | 1              | 0.99              | 0.99            | 0.99      | 1           | 1.00 (0.99-1.00) | 0.99 (0.97-1.00) | 0.99 (0.98-1.00) | 0.98 (0.96-0.99)  | 0.99 (0.97-1.00) | 0.99 (0.98-1.00) | 0.99 (0.98-1.00) |
| Left lateral orbitofrontal cortex     | 0.95          | 0.96          | 0.96           | 0.95              | 0.95            | 0.93      | 0.92        | 0.95 (0.86-0.98) | 0.95 (0.87-0.98) | 0.96 (0.89-0.99) | 0.95 (0.86-0.98)  | 0.96 (0.88-0.98) | 0.93 (0.82-0.98) | 0.93 (0.80-0.97) |
| Left lingual gyrus                    | 0.99          | 0.98          | 0.98           | 0.99              | 0.99            | 0.99      | 0.99        | 0.99 (0.96-1.00) | 0.98 (0.95-0.99) | 0.98 (0.95-0.99) | 0.99 (0.97-1.00)  | 0.99 (0.96-1.00) | 0.99 (0.96-1.00) | 0.99 (0.96-1.00) |
| Left medial orbitofrontal cortex      | 0.89          | 0.8           | 0.87           | 0.82              | 0.8             | 0.93      | 0.85        | 0.89 (0.71-0.96) | 0.79 (0.51-0.92) | 0.85 (0.63-0.94) | 0.82 (0.55-0.93)  | 0.78 (0.49-0.92) | 0.93 (0.81-0.97) | 0.85 (0.63-0.95) |
| Left middle temporal gyrus            | 0.96          | 0.97          | 0.97           | 0.97              | 0.97            | 0.93      | 0.9         | 0.96 (0.89-0.99) | 0.97 (0.91-0.99) | 0.97 (0.91-0.99) | 0.97 (0.92-0.99)  | 0.97 (0.91-0.99) | 0.94 (0.83-0.98) | 0.90 (0.75-0.97) |
| Left parahippocampal gyrus            | 0.96          | 0.94          | 0.9            | 0.94              | 0.92            | 0.88      | 0.93        | 0.96 (0.88-0.98) | 0.94 (0.84-0.98) | 0.90 (0.75-0.97) | 0.94 (0.84-0.98)  | 0.92 (0.80-0.97) | 0.89 (0.71-0.96) | 0.93 (0.81-0.97) |
| Left paracentral lobule               | 0.99          | 0.98          | 0.99           | 0.99              | 0.99            | 0.99      | 0.99        | 0.99 (0.96-0.99) | 0.97 (0.93-0.99) | 0.99 (0.96-0.99) | 0.99 (0.97-1.00)  | 0.98 (0.95-0.99) | 0.97 (0.91-0.99) | 0.98 (0.94-0.99) |
| Left pars opercularis                 | 0.98          | 0.97          | 0.97           | 0.98              | 0.98            | 0.99      | 0.98        | 0.97 (0.89-0.99) | 0.97 (0.93-0.99) | 0.97 (0.92-0.99) | 0.98 (0.95-0.99)  | 0.98 (0.93-0.99) | 0.99 (0.97-1.00) | 0.97 (0.91-0.99) |
| Left pars orbitalis                   | 0.95          | 0.93          | 0.94           | 0.94              | 0.96            | 0.96      | 0.96        | 0.95 (0.86-0.98) | 0.93 (0.81-0.97) | 0.94 (0.83-0.98) | 0.94 (0.81-0.98)  | 0.95 (0.85-0.98) | 0.96 (0.88-0.98) | 0.96 (0.88-0.98) |

|                                         |      |      |      |      |      |      |      |                  |                  |                  |                  |                  |                  |                  |
|-----------------------------------------|------|------|------|------|------|------|------|------------------|------------------|------------------|------------------|------------------|------------------|------------------|
| Left pars triangularis                  | 0.98 | 0.96 | 0.97 | 0.98 | 0.98 | 0.98 | 0.98 | 0.98 (0.94-0.99) | 0.97 (0.90-0.99) | 0.98 (0.93-0.99) | 0.98 (0.95-0.99) | 0.98 (0.95-0.99) | 0.98 (0.94-0.99) | 0.98 (0.95-0.99) |
| Left pericalcarine cortex               | 0.98 | 0.96 | 0.96 | 0.98 | 0.98 | 0.97 | 0.96 | 0.97 (0.90-0.99) | 0.95 (0.86-0.98) | 0.96 (0.89-0.98) | 0.97 (0.91-0.99) | 0.97 (0.91-0.99) | 0.96 (0.86-0.99) | 0.94 (0.79-0.98) |
| Left postcentral gyrus                  | 0.98 | 0.99 | 0.99 | 0.99 | 0.98 | 1    | 0.99 | 0.98 (0.95-0.99) | 0.99 (0.97-1.00) | 0.99 (0.97-1.00) | 0.99 (0.97-1.00) | 0.98 (0.95-0.99) | 0.99 (0.97-1.00) | 0.99 (0.96-1.00) |
| Left posterior cingulate cortex         | 0.99 | 0.99 | 0.99 | 0.99 | 0.99 | 0.98 | 0.99 | 0.99 (0.97-1.00) | 0.99 (0.96-1.00) | 0.99 (0.97-1.00) | 0.99 (0.97-1.00) | 0.99 (0.98-1.00) | 0.98 (0.94-0.99) | 0.99 (0.96-0.99) |
| Left precentral gyrus                   | 0.99 | 0.99 | 0.99 | 0.97 | 0.98 | 0.98 | 0.98 | 0.99 (0.96-0.99) | 0.99 (0.97-1.00) | 0.99 (0.97-1.00) | 0.97 (0.93-0.99) | 0.98 (0.93-0.99) | 0.98 (0.95-0.99) | 0.98 (0.93-0.99) |
| Left precuneus                          | 0.98 | 0.99 | 0.98 | 0.99 | 0.99 | 0.99 | 0.98 | 0.98 (0.92-0.99) | 0.99 (0.97-1.00) | 0.98 (0.93-0.99) | 0.99 (0.92-1.00) | 0.98 (0.91-0.99) | 0.99 (0.97-1.00) | 0.98 (0.94-0.99) |
| Left rostral anterior cingulate cortex  | 0.97 | 0.92 | 0.95 | 0.96 | 0.97 | 0.97 | 0.97 | 0.97 (0.92-0.99) | 0.93 (0.80-0.97) | 0.95 (0.87-0.98) | 0.96 (0.90-0.99) | 0.98 (0.93-0.99) | 0.97 (0.91-0.99) | 0.97 (0.92-0.99) |
| Left rostral middle frontal gyrus       | 0.98 | 0.97 | 0.97 | 0.98 | 0.98 | 0.98 | 0.98 | 0.98 (0.94-0.99) | 0.97 (0.92-0.99) | 0.97 (0.93-0.99) | 0.97 (0.92-0.99) | 0.98 (0.93-0.99) | 0.98 (0.93-0.99) | 0.98 (0.95-0.99) |
| Left superior frontal gyrus             | 0.95 | 0.97 | 0.96 | 0.96 | 0.96 | 0.96 | 0.95 | 0.95 (0.87-0.98) | 0.96 (0.89-0.99) | 0.96 (0.88-0.98) | 0.95 (0.86-0.98) | 0.94 (0.81-0.98) | 0.96 (0.88-0.98) | 0.95 (0.86-0.98) |
| Left superior parietal cortex           | 0.99 | 0.98 | 0.99 | 0.98 | 0.99 | 0.99 | 0.99 | 0.99 (0.96-1.00) | 0.98 (0.95-0.99) | 0.99 (0.96-0.99) | 0.98 (0.95-0.99) | 0.98 (0.94-0.99) | 0.98 (0.96-0.99) | 0.98 (0.96-0.99) |
| Left superior temporal gyrus            | 0.96 | 0.97 | 0.95 | 0.97 | 0.97 | 0.94 | 0.94 | 0.96 (0.89-0.99) | 0.98 (0.93-0.99) | 0.95 (0.87-0.98) | 0.98 (0.93-0.99) | 0.97 (0.93-0.99) | 0.94 (0.85-0.98) | 0.94 (0.85-0.98) |
| Left supramarginal gyrus                | 0.98 | 0.99 | 0.98 | 0.98 | 0.98 | 0.99 | 0.98 | 0.98 (0.95-0.99) | 0.99 (0.98-1.00) | 0.98 (0.95-0.99) | 0.98 (0.95-0.99) | 0.98 (0.94-0.99) | 0.99 (0.96-1.00) | 0.98 (0.94-0.99) |
| Left frontal pole                       | 0.73 | 0.75 | 0.8  | 0.77 | 0.59 | 0.88 | 0.74 | 0.73 (0.37-0.90) | 0.75 (0.42-0.91) | 0.80 (0.52-0.93) | 0.77 (0.47-0.91) | 0.58 (0.14-0.83) | 0.85 (0.64-0.95) | 0.74 (0.40-0.90) |
| Left temporal pole                      | 0.66 | 0.82 | 0.81 | 0.87 | 0.77 | 0.67 | 0.71 | 0.65 (0.26-0.86) | 0.80 (0.50-0.92) | 0.76 (0.37-0.91) | 0.85 (0.59-0.94) | 0.72 (0.36-0.89) | 0.64 (0.25-0.85) | 0.65 (0.26-0.86) |
| Left transverse temporal gyrus          | 0.96 | 0.96 | 0.96 | 0.96 | 0.96 | 0.97 | 0.96 | 0.94 (0.85-0.98) | 0.96 (0.89-0.99) | 0.97 (0.91-0.99) | 0.96 (0.90-0.99) | 0.96 (0.88-0.98) | 0.97 (0.92-0.99) | 0.96 (0.89-0.99) |
| Left insula                             | 0.84 | 0.89 | 0.81 | 0.77 | 0.78 | 0.9  | 0.78 | 0.83 (0.58-0.94) | 0.83 (0.59-0.94) | 0.81 (0.54-0.93) | 0.78 (0.47-0.92) | 0.78 (0.49-0.92) | 0.88 (0.70-0.96) | 0.78 (0.48-0.92) |
| Right banks superior temporal sulcus    | 0.95 | 0.96 | 0.96 | 0.95 | 0.94 | 0.96 | 0.93 | 0.94 (0.85-0.98) | 0.96 (0.87-0.98) | 0.95 (0.86-0.98) | 0.93 (0.79-0.98) | 0.93 (0.81-0.97) | 0.96 (0.90-0.99) | 0.92 (0.79-0.97) |
| Right caudal anterior cingulate cortex  | 0.93 | 0.87 | 0.84 | 0.98 | 0.92 | 0.88 | 0.9  | 0.91 (0.75-0.97) | 0.84 (0.61-0.94) | 0.82 (0.57-0.93) | 0.97 (0.90-0.99) | 0.90 (0.74-0.96) | 0.86 (0.66-0.95) | 0.89 (0.71-0.96) |
| Right caudal middle frontal gyrus       | 0.96 | 0.97 | 0.95 | 0.96 | 0.95 | 0.96 | 0.95 | 0.96 (0.88-0.98) | 0.97 (0.90-0.99) | 0.95 (0.87-0.98) | 0.96 (0.89-0.99) | 0.96 (0.88-0.98) | 0.96 (0.90-0.99) | 0.95 (0.87-0.98) |
| Right cuneus                            | 0.99 | 0.99 | 0.99 | 0.99 | 0.98 | 0.99 | 0.99 | 0.98 (0.96-0.99) | 0.98 (0.96-0.99) | 0.98 (0.96-0.99) | 0.99 (0.96-1.00) | 0.98 (0.94-0.99) | 0.99 (0.98-1.00) | 0.99 (0.97-1.00) |
| Right entorhinal cortex                 | 0.73 | 0.65 | 0.64 | 0.77 | 0.72 | 0.77 | 0.79 | 0.71 (0.34-0.89) | 0.67 (0.26-0.87) | 0.61 (0.18-0.84) | 0.78 (0.48-0.92) | 0.71 (0.35-0.89) | 0.77 (0.44-0.91) | 0.73 (0.38-0.90) |
| Right fusiform gyrus                    | 0.96 | 0.95 | 0.95 | 0.98 | 0.97 | 0.97 | 0.96 | 0.96 (0.89-0.99) | 0.95 (0.86-0.98) | 0.95 (0.87-0.98) | 0.98 (0.93-0.99) | 0.97 (0.92-0.99) | 0.97 (0.91-0.99) | 0.96 (0.89-0.99) |
| Right inferior parietal cortex          | 0.98 | 0.99 | 0.99 | 0.98 | 0.99 | 0.99 | 0.99 | 0.98 (0.94-0.99) | 0.99 (0.96-1.00) | 0.98 (0.96-0.99) | 0.98 (0.95-0.99) | 0.99 (0.96-0.99) | 0.98 (0.95-0.99) | 0.99 (0.97-1.00) |
| Right inferior temporal gyrus           | 0.93 | 0.93 | 0.94 | 0.89 | 0.9  | 0.92 | 0.94 | 0.93 (0.81-0.97) | 0.93 (0.82-0.98) | 0.93 (0.82-0.98) | 0.89 (0.72-0.96) | 0.90 (0.75-0.97) | 0.91 (0.77-0.97) | 0.93 (0.82-0.98) |
| Right isthmus cingulate cortex          | 0.94 | 0.98 | 0.98 | 0.97 | 0.96 | 0.98 | 0.98 | 0.94 (0.84-0.98) | 0.97 (0.93-0.99) | 0.98 (0.94-0.99) | 0.97 (0.92-0.99) | 0.96 (0.90-0.99) | 0.98 (0.94-0.99) | 0.98 (0.95-0.99) |
| Right lateral occipital cortex          | 0.99 | 0.99 | 0.99 | 0.98 | 0.99 | 0.99 | 0.99 | 0.99 (0.98-1.00) | 0.99 (0.97-1.00) | 0.99 (0.97-1.00) | 0.98 (0.95-0.99) | 0.98 (0.95-0.99) | 0.99 (0.96-0.99) | 0.99 (0.96-0.99) |
| Right lateral orbitofrontal cortex      | 0.92 | 0.93 | 0.94 | 0.91 | 0.95 | 0.86 | 0.89 | 0.92 (0.79-0.97) | 0.91 (0.77-0.97) | 0.93 (0.82-0.98) | 0.91 (0.78-0.97) | 0.95 (0.86-0.98) | 0.87 (0.67-0.95) | 0.89 (0.72-0.96) |
| Right lingual gyrus                     | 0.98 | 0.99 | 0.99 | 0.98 | 0.99 | 0.97 | 0.98 | 0.98 (0.95-0.99) | 0.99 (0.96-1.00) | 0.99 (0.97-1.00) | 0.98 (0.95-0.99) | 0.99 (0.97-1.00) | 0.97 (0.93-0.99) | 0.98 (0.95-0.99) |
| Right medial orbitofrontal cortex       | 0.96 | 0.96 | 0.98 | 0.93 | 0.96 | 0.94 | 0.95 | 0.96 (0.90-0.99) | 0.96 (0.88-0.98) | 0.98 (0.93-0.99) | 0.94 (0.83-0.98) | 0.95 (0.87-0.98) | 0.93 (0.82-0.98) | 0.95 (0.86-0.98) |
| Right middle temporal gyrus             | 0.98 | 0.97 | 0.98 | 0.95 | 0.95 | 0.97 | 0.96 | 0.98 (0.93-0.99) | 0.97 (0.92-0.99) | 0.98 (0.93-0.99) | 0.95 (0.86-0.98) | 0.95 (0.85-0.98) | 0.97 (0.90-0.99) | 0.96 (0.89-0.99) |
| Right parahippocampal gyrus             | 0.99 | 0.97 | 0.99 | 0.96 | 0.98 | 0.98 | 0.99 | 0.99 (0.96-0.99) | 0.97 (0.92-0.99) | 0.98 (0.96-0.99) | 0.96 (0.90-0.99) | 0.98 (0.93-0.99) | 0.98 (0.93-0.99) | 0.98 (0.93-1.00) |
| Right paracentral lobule                | 0.96 | 0.97 | 0.95 | 0.98 | 0.95 | 0.97 | 0.96 | 0.95 (0.88-0.98) | 0.96 (0.89-0.99) | 0.94 (0.85-0.98) | 0.98 (0.94-0.99) | 0.95 (0.87-0.98) | 0.97 (0.92-0.99) | 0.96 (0.89-0.99) |
| Right pars opercularis                  | 0.98 | 0.95 | 0.98 | 0.96 | 0.97 | 0.91 | 0.95 | 0.98 (0.94-0.99) | 0.94 (0.85-0.98) | 0.96 (0.89-0.99) | 0.95 (0.86-0.98) | 0.97 (0.91-0.99) | 0.91 (0.77-0.97) | 0.95 (0.87-0.98) |
| Right pars orbitalis                    | 0.95 | 0.98 | 0.96 | 0.96 | 0.95 | 0.96 | 0.95 | 0.95 (0.88-0.98) | 0.98 (0.94-0.99) | 0.96 (0.90-0.99) | 0.96 (0.90-0.99) | 0.95 (0.87-0.98) | 0.96 (0.88-0.98) | 0.95 (0.86-0.98) |
| Right pars triangularis                 | 0.97 | 0.98 | 0.98 | 0.99 | 0.98 | 0.97 | 0.97 | 0.96 (0.89-0.99) | 0.98 (0.93-0.99) | 0.98 (0.94-0.99) | 0.98 (0.94-0.99) | 0.97 (0.92-0.99) | 0.97 (0.91-0.99) | 0.97 (0.93-0.99) |
| Right pericalcarine cortex              | 0.97 | 0.98 | 0.97 | 0.98 | 0.97 | 0.98 | 0.98 | 0.97 (0.91-0.99) | 0.98 (0.94-0.99) | 0.96 (0.90-0.99) | 0.98 (0.94-0.99) | 0.97 (0.92-0.99) | 0.97 (0.91-0.99) | 0.97 (0.91-0.99) |
| Right postcentral gyrus                 | 0.95 | 0.98 | 0.97 | 0.96 | 0.96 | 0.96 | 0.95 | 0.95 (0.87-0.98) | 0.98 (0.95-0.99) | 0.97 (0.92-0.99) | 0.96 (0.90-0.99) | 0.96 (0.89-0.99) | 0.96 (0.89-0.99) | 0.95 (0.88-0.98) |
| Right posterior cingulate cortex        | 0.99 | 0.98 | 0.99 | 0.98 | 0.99 | 0.98 | 0.99 | 0.99 (0.97-1.00) | 0.98 (0.95-0.99) | 0.99 (0.97-1.00) | 0.98 (0.96-0.99) | 0.99 (0.97-1.00) | 0.98 (0.95-0.99) | 0.99 (0.97-1.00) |
| Right precentral gyrus                  | 0.96 | 0.97 | 0.95 | 0.97 | 0.97 | 0.96 | 0.97 | 0.97 (0.90-0.99) | 0.97 (0.91-0.99) | 0.96 (0.88-0.98) | 0.97 (0.92-0.99) | 0.97 (0.91-0.99) | 0.96 (0.88-0.98) | 0.97 (0.91-0.99) |
| Right precuneus                         | 0.97 | 0.99 | 0.98 | 0.99 | 0.99 | 0.98 | 0.96 | 0.97 (0.92-0.99) | 0.99 (0.96-1.00) | 0.98 (0.94-0.99) | 0.99 (0.96-1.00) | 0.99 (0.97-1.00) | 0.98 (0.94-0.99) | 0.97 (0.90-0.99) |
| Right rostral anterior cingulate cortex | 0.96 | 0.93 | 0.95 | 0.97 | 0.97 | 0.97 | 0.98 | 0.96 (0.89-0.99) | 0.91 (0.76-0.97) | 0.94 (0.84-0.98) | 0.96 (0.90-0.99) | 0.96 (0.89-0.99) | 0.97 (0.91-0.99) | 0.97 (0.93-0.99) |
| Right rostral middle frontal gyrus      | 0.94 | 0.95 | 0.95 | 0.97 | 0.96 | 0.97 | 0.96 | 0.94 (0.83-0.98) | 0.95 (0.86-0.98) | 0.94 (0.85-0.98) | 0.97 (0.91-0.99) | 0.95 (0.83-0.98) | 0.97 (0.91-0.99) | 0.95 (0.87-0.98) |
| Right superior frontal gyrus            | 0.96 | 0.95 | 0.94 | 0.97 | 0.96 | 0.96 | 0.96 | 0.96 (0.88-0.98) | 0.95 (0.87-0.98) | 0.94 (0.85-0.98) | 0.97 (0.93-0.99) | 0.95 (0.85-0.98) | 0.96 (0.90-0.99) | 0.96 (0.88-0.98) |
| Right superior parietal cortex          | 0.98 | 0.97 | 0.97 | 0.98 | 0.98 | 0.98 | 0.97 | 0.98 (0.94-0.99) | 0.97 (0.91-0.99) | 0.97 (0.92-0.99) | 0.97 (0.92-0.99) | 0.98 (0.95-0.99) | 0.98 (0.94-0.99) | 0.97 (0.92-0.99) |
| Right superior temporal gyrus           | 0.96 | 0.98 | 0.97 | 0.96 | 0.95 | 0.98 | 0.97 | 0.96 (0.88-0.98) | 0.97 (0.87-0.99) | 0.97 (0.91-0.99) | 0.95 (0.88-0.98) | 0.94 (0.85-0.98) | 0.98 (0.94-0.99) | 0.97 (0.92-0.99) |

|                                                |      |      |      |      |      |      |      |                  |                  |                  |                  |                  |                  |                  |
|------------------------------------------------|------|------|------|------|------|------|------|------------------|------------------|------------------|------------------|------------------|------------------|------------------|
| Right supramarginal gyrus                      | 0.99 | 0.99 | 0.99 | 0.99 | 0.99 | 0.99 | 0.99 | 0.99 (0.97-1.00) | 0.99 (0.98-1.00) | 0.99 (0.97-1.00) | 0.99 (0.97-1.00) | 0.99 (0.98-1.00) | 0.99 (0.98-1.00) | 0.99 (0.97-1.00) |
| Right frontal pole                             | 0.89 | 0.72 | 0.76 | 0.72 | 0.65 | 0.71 | 0.8  | 0.89 (0.72-0.96) | 0.72 (0.37-0.89) | 0.74 (0.39-0.90) | 0.72 (0.35-0.89) | 0.58 (0.15-0.83) | 0.69 (0.32-0.88) | 0.77 (0.42-0.91) |
| Right temporal pole                            | 0.73 | 0.91 | 0.83 | 0.74 | 0.73 | 0.88 | 0.82 | 0.73 (0.37-0.90) | 0.92 (0.78-0.97) | 0.84 (0.60-0.94) | 0.73 (0.39-0.90) | 0.73 (0.38-0.90) | 0.88 (0.69-0.95) | 0.81 (0.54-0.93) |
| Right transverse temporal gyrus                | 0.95 | 0.94 | 0.96 | 0.94 | 0.94 | 0.94 | 0.96 | 0.95 (0.87-0.98) | 0.94 (0.83-0.98) | 0.95 (0.86-0.98) | 0.94 (0.84-0.98) | 0.94 (0.83-0.98) | 0.94 (0.83-0.98) | 0.95 (0.87-0.98) |
| Right insula                                   | 0.92 | 0.91 | 0.92 | 0.91 | 0.93 | 0.92 | 0.96 | 0.93 (0.80-0.97) | 0.90 (0.75-0.96) | 0.92 (0.80-0.97) | 0.90 (0.75-0.96) | 0.93 (0.81-0.97) | 0.90 (0.69-0.97) | 0.95 (0.84-0.98) |
| <b>Local cortical surface (cm<sup>2</sup>)</b> |      |      |      |      |      |      |      |                  |                  |                  |                  |                  |                  |                  |
| Left banks superior temporal sulcus            | 0.98 | 0.98 | 0.98 | 0.99 | 0.97 | 0.98 | 0.98 | 0.98 (0.95-0.99) | 0.98 (0.95-0.99) | 0.98 (0.93-0.99) | 0.99 (0.97-1.00) | 0.97 (0.92-0.99) | 0.98 (0.95-0.99) | 0.98 (0.94-0.99) |
| Left caudal anterior cingulate cortex          | 0.99 | 0.99 | 0.99 | 0.98 | 0.99 | 1    | 1    | 0.98 (0.96-0.99) | 0.99 (0.97-1.00) | 0.99 (0.97-1.00) | 0.98 (0.95-0.99) | 0.99 (0.96-1.00) | 0.99 (0.98-1.00) | 1.00 (0.99-1.00) |
| Left caudal middle frontal gyrus               | 0.99 | 0.99 | 0.98 | 0.99 | 0.99 | 0.99 | 0.99 | 0.99 (0.98-1.00) | 0.99 (0.97-1.00) | 0.98 (0.96-0.99) | 0.99 (0.97-1.00) | 0.99 (0.97-1.00) | 0.99 (0.98-1.00) | 0.99 (0.98-1.00) |
| Left cuneus                                    | 0.98 | 0.99 | 0.99 | 0.98 | 0.99 | 0.99 | 0.99 | 0.98 (0.95-0.99) | 0.99 (0.96-1.00) | 0.99 (0.97-1.00) | 0.98 (0.94-0.99) | 0.98 (0.96-0.99) | 0.99 (0.96-1.00) | 0.99 (0.97-1.00) |
| Left entorhinal cortex                         | 0.85 | 0.91 | 0.84 | 0.89 | 0.79 | 0.93 | 0.88 | 0.86 (0.63-0.95) | 0.91 (0.77-0.97) | 0.85 (0.62-0.95) | 0.89 (0.72-0.96) | 0.79 (0.50-0.92) | 0.92 (0.79-0.97) | 0.89 (0.71-0.96) |
| Left fusiform gyrus                            | 0.99 | 0.99 | 0.98 | 0.99 | 0.99 | 0.99 | 0.99 | 0.99 (0.97-1.00) | 0.98 (0.96-0.99) | 0.98 (0.95-0.99) | 0.99 (0.96-0.99) | 0.99 (0.96-1.00) | 0.98 (0.95-0.99) | 0.99 (0.96-1.00) |
| Left inferior parietal cortex                  | 0.99 | 1    | 0.99 | 0.99 | 0.99 | 0.99 | 1    | 0.99 (0.98-1.00) | 1.00 (0.99-1.00) | 0.99 (0.99-1.00) | 0.99 (0.97-1.00) | 0.99 (0.98-1.00) | 0.99 (0.98-1.00) | 1.00 (0.99-1.00) |
| Left inferior temporal gyrus                   | 0.99 | 0.97 | 0.99 | 0.99 | 0.99 | 0.99 | 0.99 | 0.99 (0.97-1.00) | 0.97 (0.93-0.99) | 0.99 (0.97-1.00) | 0.99 (0.97-1.00) | 0.99 (0.97-1.00) | 0.99 (0.97-1.00) | 0.99 (0.97-1.00) |
| Left isthmus cingulate cortex                  | 0.97 | 0.97 | 0.98 | 0.99 | 0.99 | 0.97 | 0.97 | 0.97 (0.92-0.99) | 0.98 (0.93-0.99) | 0.98 (0.95-0.99) | 0.99 (0.98-1.00) | 0.99 (0.97-1.00) | 0.97 (0.93-0.99) | 0.97 (0.91-0.99) |
| Left lateral occipital cortex                  | 1.00 | 1    | 0.99 | 0.99 | 0.99 | 1    | 1    | 1.00 (0.99-1.00) | 1.00 (0.98-1.00) | 0.99 (0.98-1.00) | 0.99 (0.98-1.00) | 0.99 (0.98-1.00) | 1.00 (0.98-1.00) | 1.00 (0.99-1.00) |
| Left lateral orbitofrontal cortex              | 0.96 | 0.98 | 0.96 | 0.96 | 0.97 | 0.96 | 0.95 | 0.96 (0.89-0.99) | 0.98 (0.94-0.99) | 0.96 (0.90-0.99) | 0.96 (0.90-0.99) | 0.97 (0.91-0.99) | 0.96 (0.88-0.99) | 0.95 (0.87-0.98) |
| Left lingual gyrus                             | 0.98 | 0.99 | 0.99 | 0.99 | 0.99 | 0.99 | 0.99 | 0.98 (0.95-0.99) | 0.99 (0.98-1.00) | 0.99 (0.93-1.00) | 0.99 (0.98-1.00) | 0.98 (0.96-0.99) | 0.99 (0.98-1.00) | 0.99 (0.95-1.00) |
| Left medial orbitofrontal cortex               | 0.86 | 0.7  | 0.79 | 0.77 | 0.74 | 0.88 | 0.78 | 0.86 (0.65-0.95) | 0.67 (0.29-0.87) | 0.78 (0.48-0.92) | 0.77 (0.47-0.92) | 0.74 (0.40-0.90) | 0.89 (0.72-0.96) | 0.78 (0.49-0.92) |
| Left middle temporal gyrus                     | 0.98 | 0.98 | 0.97 | 0.98 | 0.98 | 0.98 | 0.97 | 0.98 (0.94-0.99) | 0.98 (0.93-0.99) | 0.97 (0.93-0.99) | 0.98 (0.94-0.99) | 0.98 (0.93-0.99) | 0.98 (0.93-0.99) | 0.97 (0.92-0.99) |
| Left parahippocampal gyrus                     | 0.98 | 0.97 | 0.97 | 0.98 | 0.97 | 0.96 | 0.97 | 0.98 (0.94-0.99) | 0.98 (0.93-0.99) | 0.97 (0.93-0.99) | 0.98 (0.94-0.99) | 0.97 (0.93-0.99) | 0.96 (0.89-0.99) | 0.97 (0.92-0.99) |
| Left paracentral lobule                        | 0.99 | 0.99 | 1    | 1    | 1    | 0.99 | 0.99 | 0.99 (0.98-1.00) | 0.99 (0.98-1.00) | 1.00 (0.99-1.00) | 1.00 (0.99-1.00) | 1.00 (0.99-1.00) | 0.99 (0.97-1.00) | 0.99 (0.98-1.00) |
| Left pars opercularis                          | 0.99 | 0.98 | 0.98 | 0.99 | 0.99 | 0.99 | 0.99 | 0.98 (0.94-0.99) | 0.98 (0.95-0.99) | 0.98 (0.93-0.99) | 0.99 (0.98-1.00) | 0.98 (0.95-0.99) | 0.99 (0.98-1.00) | 0.98 (0.94-0.99) |
| Left pars orbitalis                            | 0.96 | 0.97 | 0.97 | 0.98 | 0.99 | 0.96 | 0.97 | 0.96 (0.88-0.98) | 0.97 (0.92-0.99) | 0.97 (0.91-0.99) | 0.98 (0.95-0.99) | 0.99 (0.96-1.00) | 0.96 (0.89-0.99) | 0.97 (0.91-0.99) |
| Left pars triangularis                         | 0.99 | 0.99 | 0.99 | 0.99 | 0.99 | 0.99 | 0.99 | 0.99 (0.98-1.00) | 0.99 (0.97-1.00) | 0.99 (0.98-1.00) | 0.99 (0.97-1.00) | 0.99 (0.98-1.00) | 0.99 (0.96-1.00) | 0.99 (0.98-1.00) |
| Left pericalcarine cortex                      | 0.99 | 0.99 | 0.99 | 0.99 | 0.99 | 0.98 | 0.98 | 0.99 (0.97-1.00) | 0.99 (0.97-1.00) | 0.99 (0.96-1.00) | 0.99 (0.97-1.00) | 0.99 (0.97-1.00) | 0.98 (0.95-0.99) | 0.98 (0.94-0.99) |
| Left postcentral gyrus                         | 0.99 | 0.99 | 1    | 1    | 1    | 0.99 | 1    | 0.99 (0.98-1.00) | 0.99 (0.98-1.00) | 1.00 (0.99-1.00) | 1.00 (0.99-1.00) | 1.00 (0.99-1.00) | 0.99 (0.98-1.00) | 1.00 (0.99-1.00) |
| Left posterior cingulate cortex                | 0.99 | 0.99 | 0.99 | 0.99 | 0.98 | 0.98 | 0.98 | 0.99 (0.96-1.00) | 0.99 (0.98-1.00) | 0.99 (0.97-1.00) | 0.99 (0.97-1.00) | 0.98 (0.95-0.99) | 0.98 (0.95-0.99) | 0.98 (0.96-0.99) |
| Left precentral gyrus                          | 0.99 | 1    | 1    | 1    | 1    | 1    | 1    | 0.99 (0.98-1.00) | 1.00 (0.99-1.00) | 1.00 (0.99-1.00) | 0.99 (0.99-1.00) | 0.99 (0.99-1.00) | 0.99 (0.99-1.00) | 0.99 (0.99-1.00) |
| Left precuneus                                 | 0.99 | 1    | 0.99 | 0.99 | 1    | 0.99 | 0.99 | 0.99 (0.96-1.00) | 1.00 (0.99-1.00) | 0.99 (0.96-1.00) | 0.99 (0.98-1.00) | 0.99 (0.94-1.00) | 0.99 (0.98-1.00) | 0.99 (0.98-1.00) |
| Left rostral anterior cingulate cortex         | 0.98 | 0.93 | 0.95 | 0.96 | 0.98 | 0.98 | 0.98 | 0.98 (0.94-0.99) | 0.92 (0.80-0.97) | 0.95 (0.86-0.98) | 0.96 (0.89-0.99) | 0.98 (0.95-0.99) | 0.98 (0.94-0.99) | 0.98 (0.95-0.99) |
| Left rostral middle frontal gyrus              | 0.98 | 0.98 | 0.99 | 0.99 | 0.99 | 0.99 | 0.99 | 0.98 (0.95-0.99) | 0.98 (0.94-0.99) | 0.99 (0.96-1.00) | 0.99 (0.96-0.99) | 0.99 (0.97-1.00) | 0.99 (0.97-1.00) | 0.99 (0.98-1.00) |
| Left superior frontal gyrus                    | 0.99 | 0.99 | 0.99 | 0.99 | 0.99 | 0.99 | 0.99 | 0.99 (0.98-1.00) | 0.99 (0.98-1.00) | 0.99 (0.98-1.00) | 0.99 (0.97-1.00) | 0.99 (0.98-1.00) | 0.99 (0.97-1.00) | 0.99 (0.97-1.00) |
| Left superior parietal cortex                  | 1.00 | 1    | 1    | 0.99 | 1    | 1    | 1    | 1.00 (0.99-1.00) | 1.00 (0.99-1.00) | 1.00 (0.99-1.00) | 0.99 (0.98-1.00) | 1.00 (0.99-1.00) | 1.00 (0.99-1.00) | 1.00 (0.99-1.00) |
| Left superior temporal gyrus                   | 1.00 | 1    | 0.99 | 1    | 0.99 | 0.99 | 0.99 | 0.99 (0.97-1.00) | 1.00 (0.99-1.00) | 0.99 (0.98-1.00) | 1.00 (0.99-1.00) | 0.99 (0.98-1.00) | 0.99 (0.98-1.00) | 0.99 (0.97-1.00) |
| Left supramarginal gyrus                       | 0.99 | 1    | 0.99 | 1    | 0.99 | 1    | 0.99 | 0.99 (0.97-1.00) | 1.00 (0.99-1.00) | 0.99 (0.97-1.00) | 1.00 (0.99-1.00) | 0.99 (0.99-1.00) | 1.00 (0.99-1.00) | 0.99 (0.98-1.00) |
| Left frontal pole                              | 0.56 | 0.7  | 0.62 | 0.77 | 0.63 | 0.73 | 0.65 | 0.53 (0.09-0.80) | 0.70 (0.33-0.88) | 0.63 (0.21-0.85) | 0.76 (0.44-0.91) | 0.60 (0.16-0.84) | 0.73 (0.39-0.90) | 0.64 (0.22-0.86) |
| Left temporal pole                             | 0.75 | 0.6  | 0.74 | 0.71 | 0.71 | 0.64 | 0.65 | 0.74 (0.40-0.90) | 0.62 (0.18-0.85) | 0.71 (0.36-0.89) | 0.72 (0.36-0.89) | 0.71 (0.34-0.89) | 0.65 (0.23-0.86) | 0.66 (0.25-0.87) |
| Left transverse temporal gyrus                 | 0.96 | 0.98 | 0.99 | 0.96 | 0.97 | 0.99 | 0.99 | 0.95 (0.86-0.98) | 0.98 (0.94-0.99) | 0.99 (0.97-1.00) | 0.96 (0.89-0.99) | 0.97 (0.93-0.99) | 0.99 (0.98-1.00) | 0.99 (0.97-1.00) |
| Left insula                                    | 0.77 | 0.88 | 0.61 | 0.71 | 0.7  | 0.75 | 0.67 | 0.70 (0.32-0.88) | 0.83 (0.59-0.94) | 0.63 (0.19-0.85) | 0.71 (0.36-0.89) | 0.71 (0.34-0.89) | 0.74 (0.40-0.90) | 0.67 (0.27-0.87) |
| Right banks superior temporal sulcus           | 0.99 | 0.98 | 0.98 | 0.96 | 0.97 | 0.97 | 0.97 | 0.98 (0.94-0.99) | 0.98 (0.94-0.99) | 0.98 (0.93-0.99) | 0.95 (0.75-0.98) | 0.96 (0.88-0.98) | 0.97 (0.92-0.99) | 0.96 (0.88-0.99) |
| Right caudal anterior cingulate cortex         | 0.97 | 0.96 | 0.93 | 0.99 | 0.97 | 0.96 | 0.96 | 0.96 (0.89-0.99) | 0.95 (0.86-0.98) | 0.92 (0.79-0.97) | 0.98 (0.95-0.99) | 0.97 (0.91-0.99) | 0.96 (0.88-0.98) | 0.96 (0.89-0.99) |
| Right caudal middle frontal gyrus              | 0.99 | 0.99 | 0.98 | 0.97 | 0.97 | 0.98 | 0.99 | 0.99 (0.96-1.00) | 0.99 (0.97-1.00) | 0.98 (0.94-0.99) | 0.98 (0.93-0.99) | 0.97 (0.92-0.99) | 0.98 (0.95-0.99) | 0.99 (0.96-1.00) |
| Right cuneus                                   | 1.00 | 0.99 | 0.99 | 0.99 | 0.99 | 0.99 | 0.99 | 0.99 (0.97-1.00) | 0.99 (0.98-1.00) | 0.99 (0.98-1.00) | 0.98 (0.95-0.99) | 0.98 (0.95-0.99) | 0.99 (0.96-1.00) | 0.99 (0.97-1.00) |
| Right entorhinal cortex                        | 0.90 | 0.79 | 0.85 | 0.93 | 0.9  | 0.92 | 0.89 | 0.90 (0.74-0.96) | 0.80 (0.51-0.92) | 0.83 (0.59-0.94) | 0.93 (0.82-0.98) | 0.91 (0.75-0.97) | 0.92 (0.79-0.97) | 0.88 (0.70-0.96) |

|                                         |      |      |      |      |      |      |      |                  |                  |                  |                  |                  |                  |                  |
|-----------------------------------------|------|------|------|------|------|------|------|------------------|------------------|------------------|------------------|------------------|------------------|------------------|
| Right fusiform gyrus                    | 1.00 | 0.99 | 0.99 | 1    | 1    | 0.99 | 1    | 0.99 (0.99-1.00) | 0.99 (0.97-1.00) | 0.99 (0.98-1.00) | 0.99 (0.97-1.00) | 1.00 (0.99-1.00) | 0.99 (0.99-1.00) | 1.00 (0.99-1.00) |
| Right inferior parietal cortex          | 0.99 | 0.99 | 0.99 | 0.98 | 0.99 | 0.99 | 1    | 0.99 (0.98-1.00) | 0.99 (0.96-0.99) | 0.99 (0.97-1.00) | 0.98 (0.95-0.99) | 0.99 (0.97-1.00) | 0.99 (0.98-1.00) | 1.00 (0.99-1.00) |
| Right inferior temporal gyrus           | 0.98 | 0.99 | 0.99 | 0.97 | 0.98 | 0.98 | 0.98 | 0.98 (0.93-0.99) | 0.99 (0.97-1.00) | 0.99 (0.96-0.99) | 0.97 (0.93-0.99) | 0.98 (0.94-0.99) | 0.97 (0.93-0.99) | 0.98 (0.94-0.99) |
| Right isthmus cingulate cortex          | 0.99 | 0.99 | 0.99 | 0.99 | 0.99 | 0.99 | 0.99 | 0.99 (0.96-0.99) | 0.99 (0.97-1.00) | 0.98 (0.96-0.99) | 0.99 (0.96-1.00) | 0.99 (0.97-1.00) | 0.99 (0.98-1.00) | 0.98 (0.94-0.99) |
| Right lateral occipital cortex          | 1.00 | 1    | 1    | 1    | 0.99 | 0.99 | 1    | 1.00 (0.99-1.00) | 1.00 (1.00-1.00) | 1.00 (0.99-1.00) | 1.00 (0.99-1.00) | 0.99 (0.98-1.00) | 0.99 (0.98-1.00) | 0.99 (0.98-1.00) |
| Right lateral orbitofrontal cortex      | 0.89 | 0.97 | 0.9  | 0.89 | 0.92 | 0.85 | 0.89 | 0.89 (0.72-0.96) | 0.97 (0.91-0.99) | 0.90 (0.73-0.96) | 0.88 (0.70-0.96) | 0.91 (0.77-0.97) | 0.84 (0.60-0.94) | 0.90 (0.73-0.96) |
| Right lingual gyrus                     | 0.99 | 0.99 | 0.99 | 0.99 | 0.99 | 0.99 | 0.99 | 0.99 (0.98-1.00) | 0.99 (0.98-1.00) | 0.99 (0.97-1.00) | 0.99 (0.98-1.00) | 0.99 (0.98-1.00) | 0.98 (0.96-0.99) | 0.99 (0.97-1.00) |
| Right medial orbitofrontal cortex       | 0.94 | 0.95 | 0.98 | 0.88 | 0.91 | 0.91 | 0.95 | 0.94 (0.84-0.98) | 0.94 (0.82-0.98) | 0.98 (0.94-0.99) | 0.88 (0.68-0.95) | 0.91 (0.77-0.97) | 0.90 (0.75-0.96) | 0.95 (0.86-0.98) |
| Right middle temporal gyrus             | 0.99 | 0.99 | 0.99 | 0.98 | 0.99 | 0.99 | 1    | 0.99 (0.98-1.00) | 0.99 (0.96-1.00) | 0.99 (0.98-1.00) | 0.98 (0.94-0.99) | 0.99 (0.97-1.00) | 0.99 (0.98-1.00) | 1.00 (0.99-1.00) |
| Right parahippocampal gyrus             | 0.99 | 0.97 | 0.99 | 0.97 | 0.98 | 0.98 | 0.98 | 0.98 (0.94-0.99) | 0.96 (0.90-0.99) | 0.98 (0.94-0.99) | 0.97 (0.92-0.99) | 0.98 (0.94-0.99) | 0.98 (0.95-0.99) | 0.98 (0.90-0.99) |
| Right paracentral lobule                | 0.97 | 0.98 | 0.98 | 0.98 | 0.97 | 0.99 | 0.98 | 0.97 (0.93-0.99) | 0.98 (0.94-0.99) | 0.98 (0.95-0.99) | 0.98 (0.95-0.99) | 0.97 (0.93-0.99) | 0.99 (0.97-1.00) | 0.98 (0.95-0.99) |
| Right pars opercularis                  | 0.98 | 0.96 | 0.99 | 0.98 | 0.99 | 0.94 | 0.97 | 0.98 (0.96-0.99) | 0.96 (0.89-0.99) | 0.98 (0.94-0.99) | 0.97 (0.92-0.99) | 0.98 (0.96-0.99) | 0.93 (0.83-0.98) | 0.97 (0.93-0.99) |
| Right pars orbitalis                    | 0.96 | 0.98 | 0.99 | 0.98 | 0.98 | 0.99 | 0.98 | 0.97 (0.90-0.99) | 0.98 (0.95-0.99) | 0.99 (0.96-0.99) | 0.98 (0.95-0.99) | 0.98 (0.94-0.99) | 0.99 (0.97-1.00) | 0.98 (0.94-0.99) |
| Right pars triangularis                 | 0.99 | 0.99 | 0.99 | 0.99 | 0.99 | 0.99 | 0.99 | 0.99 (0.98-1.00) | 0.99 (0.98-1.00) | 0.99 (0.98-1.00) | 0.99 (0.94-1.00) | 0.99 (0.97-1.00) | 0.99 (0.98-1.00) | 0.99 (0.98-1.00) |
| Right pericalcarine cortex              | 0.99 | 0.99 | 0.99 | 0.99 | 0.99 | 0.99 | 0.99 | 0.99 (0.97-1.00) | 0.99 (0.98-1.00) | 0.99 (0.97-1.00) | 0.98 (0.93-0.99) | 0.99 (0.97-1.00) | 0.99 (0.97-1.00) | 0.99 (0.98-1.00) |
| Right postcentral gyrus                 | 0.98 | 0.99 | 0.99 | 0.99 | 0.99 | 0.99 | 0.99 | 0.98 (0.95-0.99) | 0.99 (0.98-1.00) | 0.99 (0.97-1.00) | 0.99 (0.98-1.00) | 0.99 (0.96-1.00) | 0.99 (0.96-1.00) | 0.98 (0.96-0.99) |
| Right posterior cingulate cortex        | 0.99 | 0.98 | 0.99 | 0.99 | 0.99 | 0.99 | 0.99 | 0.99 (0.96-1.00) | 0.98 (0.93-0.99) | 0.99 (0.97-1.00) | 0.99 (0.97-1.00) | 0.99 (0.98-1.00) | 0.99 (0.97-1.00) | 0.99 (0.98-1.00) |
| Right precentral gyrus                  | 0.99 | 0.99 | 0.99 | 1    | 0.99 | 1    | 0.99 | 0.99 (0.99-1.00) | 0.99 (0.99-1.00) | 0.99 (0.97-1.00) | 1.00 (0.99-1.00) | 0.99 (0.98-1.00) | 0.99 (0.98-1.00) | 0.99 (0.97-1.00) |
| Right precuneus                         | 0.99 | 1    | 1    | 0.99 | 0.99 | 1    | 0.99 | 0.99 (0.98-1.00) | 1.00 (0.99-1.00) | 1.00 (0.99-1.00) | 0.99 (0.98-1.00) | 0.99 (0.99-1.00) | 1.00 (0.99-1.00) | 0.99 (0.98-1.00) |
| Right rostral anterior cingulate cortex | 0.99 | 0.96 | 0.97 | 0.97 | 0.98 | 0.96 | 0.97 | 0.99 (0.97-1.00) | 0.94 (0.85-0.98) | 0.97 (0.91-0.99) | 0.97 (0.92-0.99) | 0.98 (0.94-0.99) | 0.96 (0.88-0.99) | 0.97 (0.92-0.99) |
| Right rostral middle frontal gyrus      | 0.99 | 0.99 | 0.99 | 0.99 | 0.99 | 0.99 | 0.99 | 0.99 (0.97-1.00) | 0.99 (0.97-1.00) | 0.99 (0.97-1.00) | 0.99 (0.96-1.00) | 0.99 (0.96-1.00) | 0.99 (0.97-1.00) | 0.99 (0.97-1.00) |
| Right superior frontal gyrus            | 1.00 | 0.99 | 0.99 | 1    | 1    | 1    | 1    | 1.00 (0.99-1.00) | 0.99 (0.97-1.00) | 0.99 (0.98-1.00) | 1.00 (0.99-1.00) | 1.00 (0.99-1.00) | 1.00 (0.99-1.00) | 1.00 (0.99-1.00) |
| Right superior parietal cortex          | 0.99 | 0.99 | 0.99 | 0.98 | 0.99 | 1    | 0.99 | 0.99 (0.97-1.00) | 0.99 (0.97-1.00) | 0.99 (0.96-1.00) | 0.98 (0.94-0.99) | 0.99 (0.97-1.00) | 1.00 (0.99-1.00) | 0.99 (0.97-1.00) |
| Right superior temporal gyrus           | 1.00 | 1    | 1    | 0.99 | 1    | 1    | 0.99 | 1.00 (0.99-1.00) | 0.99 (0.98-1.00) | 1.00 (0.99-1.00) | 0.99 (0.98-1.00) | 0.99 (0.99-1.00) | 0.99 (0.98-1.00) | 0.99 (0.98-1.00) |
| Right supramarginal gyrus               | 1.00 | 1    | 1    | 1    | 1    | 1    | 1    | 1.00 (0.99-1.00) | 0.99 (0.98-1.00) | 0.99 (0.98-1.00) | 1.00 (0.99-1.00) | 1.00 (1.00-1.00) | 1.00 (0.99-1.00) | 1.00 (0.99-1.00) |
| Right frontal pole                      | 0.92 | 0.83 | 0.87 | 0.82 | 0.91 | 0.77 | 0.87 | 0.91 (0.77-0.97) | 0.82 (0.58-0.93) | 0.86 (0.64-0.95) | 0.83 (0.58-0.94) | 0.91 (0.76-0.97) | 0.76 (0.45-0.91) | 0.85 (0.63-0.95) |
| Right temporal pole                     | 0.81 | 0.81 | 0.92 | 0.88 | 0.88 | 0.8  | 0.85 | 0.80 (0.53-0.92) | 0.81 (0.54-0.93) | 0.89 (0.70-0.96) | 0.87 (0.67-0.95) | 0.85 (0.63-0.94) | 0.80 (0.52-0.92) | 0.80 (0.49-0.93) |
| Right transverse temporal gyrus         | 0.95 | 0.96 | 0.96 | 0.97 | 0.97 | 0.94 | 0.97 | 0.95 (0.87-0.98) | 0.94 (0.85-0.98) | 0.96 (0.90-0.99) | 0.97 (0.91-0.99) | 0.97 (0.91-0.99) | 0.94 (0.84-0.98) | 0.97 (0.92-0.99) |
| Right insula                            | 0.90 | 0.85 | 0.91 | 0.79 | 0.83 | 0.84 | 0.94 | 0.88 (0.70-0.96) | 0.85 (0.61-0.94) | 0.90 (0.75-0.97) | 0.75 (0.43-0.90) | 0.80 (0.53-0.93) | 0.81 (0.52-0.93) | 0.93 (0.80-0.97) |
| <b>Local cortical thickness (mm)</b>    |      |      |      |      |      |      |      |                  |                  |                  |                  |                  |                  |                  |
| Left banks superior temporal sulcus     | 0.81 | 0.93 | 0.93 | 0.89 | 0.89 | 0.92 | 0.86 | 0.82 (0.56-0.94) | 0.93 (0.81-0.98) | 0.93 (0.82-0.98) | 0.89 (0.73-0.96) | 0.89 (0.72-0.96) | 0.93 (0.81-0.97) | 0.86 (0.65-0.95) |
| Left caudal anterior cingulate cortex   | 0.69 | 0.82 | 0.74 | 0.82 | 0.72 | 0.7  | 0.65 | 0.67 (0.28-0.87) | 0.81 (0.55-0.93) | 0.69 (0.33-0.88) | 0.80 (0.52-0.92) | 0.67 (0.30-0.87) | 0.71 (0.34-0.89) | 0.61 (0.18-0.84) |
| Left caudal middle frontal gyrus        | 0.84 | 0.8  | 0.8  | 0.85 | 0.77 | 0.8  | 0.77 | 0.83 (0.59-0.94) | 0.78 (0.48-0.92) | 0.78 (0.48-0.92) | 0.83 (0.57-0.94) | 0.74 (0.42-0.90) | 0.80 (0.52-0.92) | 0.77 (0.47-0.91) |
| Left cuneus                             | 0.88 | 0.86 | 0.92 | 0.91 | 0.91 | 0.91 | 0.94 | 0.88 (0.69-0.96) | 0.87 (0.66-0.95) | 0.92 (0.80-0.97) | 0.91 (0.77-0.97) | 0.92 (0.78-0.97) | 0.91 (0.78-0.97) | 0.94 (0.84-0.98) |
| Left entorhinal cortex                  | 0.90 | 0.86 | 0.95 | 0.88 | 0.92 | 0.8  | 0.92 | 0.90 (0.75-0.96) | 0.86 (0.66-0.95) | 0.95 (0.86-0.98) | 0.87 (0.68-0.95) | 0.91 (0.76-0.97) | 0.80 (0.51-0.93) | 0.92 (0.78-0.97) |
| Left fusiform gyrus                     | 0.89 | 0.9  | 0.9  | 0.86 | 0.89 | 0.84 | 0.89 | 0.89 (0.73-0.96) | 0.89 (0.72-0.96) | 0.89 (0.73-0.96) | 0.86 (0.65-0.95) | 0.89 (0.71-0.96) | 0.84 (0.61-0.94) | 0.88 (0.70-0.96) |
| Left inferior parietal cortex           | 0.84 | 0.91 | 0.9  | 0.82 | 0.8  | 0.9  | 0.89 | 0.82 (0.55-0.93) | 0.89 (0.72-0.96) | 0.90 (0.74-0.96) | 0.83 (0.57-0.94) | 0.80 (0.51-0.92) | 0.88 (0.67-0.96) | 0.87 (0.65-0.95) |
| Left inferior temporal gyrus            | 0.88 | 0.91 | 0.9  | 0.85 | 0.89 | 0.89 | 0.92 | 0.86 (0.66-0.95) | 0.88 (0.65-0.96) | 0.89 (0.70-0.96) | 0.83 (0.60-0.94) | 0.88 (0.70-0.96) | 0.86 (0.60-0.95) | 0.89 (0.69-0.96) |
| Left isthmus cingulate cortex           | 0.88 | 0.94 | 0.95 | 0.97 | 0.98 | 0.94 | 0.91 | 0.89 (0.71-0.96) | 0.92 (0.79-0.97) | 0.94 (0.85-0.98) | 0.96 (0.89-0.99) | 0.97 (0.92-0.99) | 0.92 (0.78-0.97) | 0.91 (0.77-0.97) |
| Left lateral occipital cortex           | 0.97 | 0.89 | 0.96 | 0.93 | 0.96 | 0.92 | 0.95 | 0.96 (0.89-0.99) | 0.87 (0.66-0.95) | 0.94 (0.84-0.98) | 0.92 (0.78-0.97) | 0.95 (0.87-0.98) | 0.92 (0.79-0.97) | 0.94 (0.85-0.98) |
| Left lateral orbitofrontal cortex       | 0.86 | 0.86 | 0.85 | 0.8  | 0.81 | 0.85 | 0.85 | 0.85 (0.63-0.94) | 0.86 (0.65-0.95) | 0.86 (0.64-0.95) | 0.80 (0.53-0.93) | 0.80 (0.53-0.93) | 0.82 (0.53-0.93) | 0.82 (0.55-0.93) |
| Left lingual gyrus                      | 0.84 | 0.91 | 0.86 | 0.94 | 0.89 | 0.9  | 0.85 | 0.82 (0.57-0.93) | 0.89 (0.69-0.96) | 0.84 (0.57-0.94) | 0.94 (0.83-0.98) | 0.87 (0.68-0.95) | 0.89 (0.71-0.96) | 0.83 (0.56-0.94) |
| Left medial orbitofrontal cortex        | 0.66 | 0.67 | 0.7  | 0.49 | 0.48 | 0.76 | 0.69 | 0.65 (0.27-0.86) | 0.68 (0.29-0.88) | 0.67 (0.30-0.87) | 0.48 (0.01-0.78) | 0.46 (0.00-0.76) | 0.76 (0.44-0.91) | 0.69 (0.31-0.88) |
| Left middle temporal gyrus              | 0.83 | 0.91 | 0.86 | 0.78 | 0.83 | 0.8  | 0.72 | 0.84 (0.60-0.94) | 0.92 (0.78-0.97) | 0.86 (0.65-0.95) | 0.79 (0.49-0.92) | 0.82 (0.57-0.93) | 0.80 (0.52-0.93) | 0.73 (0.38-0.90) |
| Left parahippocampal gyrus              | 0.97 | 0.96 | 0.95 | 0.99 | 0.96 | 0.98 | 0.96 | 0.97 (0.92-0.99) | 0.96 (0.89-0.99) | 0.95 (0.87-0.98) | 0.98 (0.95-0.99) | 0.96 (0.88-0.98) | 0.98 (0.93-0.99) | 0.96 (0.89-0.99) |

|                                         |      |      |      |      |      |      |      |                   |                   |                   |                   |                   |                   |                   |
|-----------------------------------------|------|------|------|------|------|------|------|-------------------|-------------------|-------------------|-------------------|-------------------|-------------------|-------------------|
| Left paracentral lobule                 | 0.88 | 0.85 | 0.93 | 0.92 | 0.89 | 0.9  | 0.88 | 0.89 (0.71-0.96)  | 0.86 (0.64-0.95)  | 0.90 (0.75-0.97)  | 0.91 (0.77-0.97)  | 0.86 (0.65-0.95)  | 0.90 (0.73-0.96)  | 0.86 (0.65-0.95)  |
| Left pars opercularis                   | 0.88 | 0.93 | 0.87 | 0.91 | 0.86 | 0.85 | 0.9  | 0.88 (0.69-0.96)  | 0.93 (0.82-0.98)  | 0.88 (0.68-0.95)  | 0.91 (0.77-0.97)  | 0.87 (0.66-0.95)  | 0.84 (0.61-0.94)  | 0.90 (0.75-0.97)  |
| Left pars orbitalis                     | 0.85 | 0.89 | 0.85 | 0.9  | 0.88 | 0.84 | 0.84 | 0.85 (0.62-0.94)  | 0.88 (0.69-0.95)  | 0.85 (0.62-0.94)  | 0.89 (0.72-0.96)  | 0.86 (0.64-0.95)  | 0.85 (0.61-0.94)  | 0.85 (0.63-0.95)  |
| Left pars triangularis                  | 0.91 | 0.96 | 0.96 | 0.92 | 0.91 | 0.95 | 0.93 | 0.91 (0.78-0.97)  | 0.96 (0.90-0.99)  | 0.96 (0.89-0.99)  | 0.92 (0.79-0.97)  | 0.91 (0.77-0.97)  | 0.94 (0.85-0.98)  | 0.93 (0.81-0.97)  |
| Left pericalcarine cortex               | 0.71 | 0.78 | 0.8  | 0.88 | 0.88 | 0.81 | 0.85 | 0.72 (0.36-0.89)  | 0.79 (0.50-0.92)  | 0.80 (0.53-0.93)  | 0.87 (0.66-0.95)  | 0.88 (0.69-0.95)  | 0.81 (0.54-0.93)  | 0.82 (0.55-0.94)  |
| Left postcentral gyrus                  | 0.89 | 0.95 | 0.92 | 0.94 | 0.89 | 0.96 | 0.89 | 0.89 (0.71-0.96)  | 0.96 (0.88-0.98)  | 0.92 (0.80-0.97)  | 0.93 (0.81-0.98)  | 0.89 (0.71-0.96)  | 0.95 (0.87-0.98)  | 0.89 (0.72-0.96)  |
| Left posterior cingulate cortex         | 0.86 | 0.84 | 0.86 | 0.82 | 0.82 | 0.86 | 0.84 | 0.86 (0.64-0.95)  | 0.85 (0.62-0.94)  | 0.86 (0.65-0.95)  | 0.82 (0.56-0.93)  | 0.83 (0.57-0.94)  | 0.86 (0.64-0.95)  | 0.84 (0.59-0.94)  |
| Left precentral gyrus                   | 0.95 | 0.95 | 0.94 | 0.92 | 0.89 | 0.9  | 0.92 | 0.94 (0.84-0.98)  | 0.94 (0.84-0.98)  | 0.92 (0.80-0.97)  | 0.92 (0.78-0.97)  | 0.89 (0.72-0.96)  | 0.88 (0.69-0.96)  | 0.86 (0.66-0.95)  |
| Left precuneus                          | 0.88 | 0.93 | 0.89 | 0.91 | 0.91 | 0.86 | 0.87 | 0.88 (0.69-0.96)  | 0.93 (0.80-0.97)  | 0.89 (0.71-0.96)  | 0.89 (0.71-0.96)  | 0.90 (0.73-0.96)  | 0.87 (0.66-0.95)  | 0.88 (0.68-0.96)  |
| Left rostral anterior cingulate cortex  | 0.88 | 0.89 | 0.87 | 0.92 | 0.86 | 0.84 | 0.89 | 0.88 (0.69-0.96)  | 0.88 (0.71-0.96)  | 0.87 (0.68-0.95)  | 0.93 (0.81-0.97)  | 0.87 (0.67-0.95)  | 0.84 (0.61-0.94)  | 0.89 (0.72-0.96)  |
| Left rostral middle frontal gyrus       | 0.91 | 0.91 | 0.9  | 0.9  | 0.92 | 0.89 | 0.91 | 0.89 (0.72-0.96)  | 0.90 (0.74-0.96)  | 0.89 (0.71-0.96)  | 0.88 (0.70-0.96)  | 0.89 (0.71-0.96)  | 0.88 (0.70-0.96)  | 0.90 (0.73-0.96)  |
| Left superior frontal gyrus             | 0.75 | 0.79 | 0.79 | 0.82 | 0.74 | 0.72 | 0.69 | 0.71 (0.34-0.89)  | 0.76 (0.43-0.91)  | 0.75 (0.41-0.91)  | 0.78 (0.44-0.92)  | 0.69 (0.28-0.88)  | 0.71 (0.36-0.89)  | 0.68 (0.31-0.87)  |
| Left superior parietal cortex           | 0.89 | 0.81 | 0.92 | 0.88 | 0.86 | 0.88 | 0.88 | 0.84 (0.60-0.94)  | 0.79 (0.51-0.92)  | 0.86 (0.66-0.95)  | 0.85 (0.62-0.94)  | 0.78 (0.49-0.92)  | 0.85 (0.64-0.95)  | 0.83 (0.59-0.94)  |
| Left superior temporal gyrus            | 0.79 | 0.92 | 0.83 | 0.91 | 0.88 | 0.88 | 0.85 | 0.78 (0.47-0.92)  | 0.89 (0.72-0.96)  | 0.81 (0.54-0.93)  | 0.86 (0.65-0.95)  | 0.86 (0.64-0.95)  | 0.87 (0.66-0.95)  | 0.83 (0.59-0.94)  |
| Left supramarginal gyrus                | 0.74 | 0.92 | 0.88 | 0.85 | 0.73 | 0.93 | 0.81 | 0.74 (0.40-0.90)  | 0.92 (0.80-0.97)  | 0.87 (0.68-0.95)  | 0.86 (0.64-0.95)  | 0.73 (0.39-0.90)  | 0.92 (0.80-0.97)  | 0.80 (0.52-0.92)  |
| Left frontal pole                       | 0.90 | 0.88 | 0.88 | 0.79 | 0.49 | 0.8  | 0.78 | 0.88 (0.69-0.96)  | 0.88 (0.69-0.96)  | 0.85 (0.63-0.95)  | 0.80 (0.51-0.92)  | 0.47 (-0.01-0.78) | 0.79 (0.49-0.92)  | 0.76 (0.43-0.91)  |
| Left temporal pole                      | 0.80 | 0.79 | 0.75 | 0.88 | 0.79 | 0.78 | 0.76 | 0.81 (0.54-0.93)  | 0.80 (0.51-0.92)  | 0.76 (0.43-0.91)  | 0.87 (0.67-0.95)  | 0.79 (0.50-0.92)  | 0.77 (0.47-0.91)  | 0.76 (0.45-0.91)  |
| Left transverse temporal gyrus          | 0.82 | 0.91 | 0.86 | 0.89 | 0.85 | 0.91 | 0.84 | 0.83 (0.58-0.94)  | 0.91 (0.77-0.97)  | 0.87 (0.67-0.95)  | 0.90 (0.73-0.96)  | 0.85 (0.63-0.95)  | 0.91 (0.76-0.97)  | 0.85 (0.62-0.95)  |
| Left insula                             | 0.71 | 0.55 | 0.23 | 0.53 | 0.55 | 0.44 | 0.6  | 0.69 (0.30-0.88)  | 0.56 (0.11-0.82)  | 0.24 (-0.31-0.66) | 0.51 (0.06-0.79)  | 0.57 (0.10-0.83)  | 0.40 (-0.06-0.73) | 0.59 (0.14-0.84)  |
| Right banks superior temporal sulcus    | 0.92 | 0.93 | 0.86 | 0.89 | 0.87 | 0.92 | 0.9  | 0.92 (0.79-0.97)  | 0.93 (0.81-0.97)  | 0.87 (0.66-0.95)  | 0.90 (0.73-0.96)  | 0.88 (0.69-0.96)  | 0.90 (0.73-0.96)  | 0.90 (0.75-0.96)  |
| Right caudal anterior cingulate cortex  | 0.82 | 0.8  | 0.81 | 0.79 | 0.82 | 0.79 | 0.82 | 0.80 (0.50-0.92)  | 0.79 (0.50-0.92)  | 0.80 (0.52-0.92)  | 0.78 (0.48-0.92)  | 0.81 (0.55-0.93)  | 0.77 (0.45-0.91)  | 0.77 (0.40-0.92)  |
| Right caudal middle frontal gyrus       | 0.63 | 0.76 | 0.68 | 0.84 | 0.7  | 0.83 | 0.66 | 0.60 (0.18-0.84)  | 0.71 (0.36-0.89)  | 0.65 (0.25-0.86)  | 0.81 (0.55-0.93)  | 0.64 (0.25-0.85)  | 0.83 (0.59-0.94)  | 0.62 (0.22-0.85)  |
| Right cuneus                            | 0.95 | 0.93 | 0.94 | 0.96 | 0.96 | 0.97 | 0.96 | 0.94 (0.84-0.98)  | 0.92 (0.79-0.97)  | 0.92 (0.79-0.97)  | 0.95 (0.84-0.98)  | 0.95 (0.87-0.98)  | 0.96 (0.81-0.99)  | 0.95 (0.86-0.98)  |
| Right entorhinal cortex                 | 0.77 | 0.74 | 0.76 | 0.81 | 0.82 | 0.8  | 0.76 | 0.76 (0.44-0.91)  | 0.73 (0.39-0.90)  | 0.76 (0.42-0.91)  | 0.79 (0.49-0.92)  | 0.78 (0.47-0.92)  | 0.78 (0.48-0.92)  | 0.75 (0.42-0.91)  |
| Right fusiform gyrus                    | 0.83 | 0.88 | 0.87 | 0.79 | 0.83 | 0.88 | 0.87 | 0.83 (0.59-0.94)  | 0.89 (0.71-0.96)  | 0.88 (0.68-0.95)  | 0.80 (0.52-0.93)  | 0.84 (0.60-0.94)  | 0.89 (0.71-0.96)  | 0.87 (0.68-0.95)  |
| Right inferior parietal cortex          | 0.79 | 0.84 | 0.8  | 0.73 | 0.74 | 0.82 | 0.79 | 0.80 (0.50-0.92)  | 0.84 (0.61-0.94)  | 0.80 (0.52-0.93)  | 0.73 (0.37-0.90)  | 0.74 (0.39-0.90)  | 0.80 (0.52-0.93)  | 0.77 (0.47-0.91)  |
| Right inferior temporal gyrus           | 0.83 | 0.76 | 0.8  | 0.71 | 0.75 | 0.84 | 0.87 | 0.84 (0.59-0.94)  | 0.77 (0.46-0.91)  | 0.81 (0.53-0.93)  | 0.72 (0.37-0.89)  | 0.76 (0.44-0.91)  | 0.84 (0.61-0.94)  | 0.87 (0.68-0.95)  |
| Right isthmus cingulate cortex          | 0.86 | 0.92 | 0.9  | 0.91 | 0.87 | 0.94 | 0.86 | 0.87 (0.67-0.95)  | 0.93 (0.81-0.97)  | 0.89 (0.72-0.96)  | 0.91 (0.76-0.97)  | 0.87 (0.68-0.95)  | 0.93 (0.81-0.97)  | 0.87 (0.66-0.95)  |
| Right lateral occipital cortex          | 0.89 | 0.78 | 0.89 | 0.81 | 0.89 | 0.85 | 0.91 | 0.90 (0.73-0.96)  | 0.79 (0.50-0.92)  | 0.89 (0.72-0.96)  | 0.80 (0.52-0.92)  | 0.88 (0.71-0.96)  | 0.81 (0.47-0.93)  | 0.89 (0.69-0.96)  |
| Right lateral orbitofrontal cortex      | 0.67 | 0.76 | 0.61 | 0.85 | 0.68 | 0.83 | 0.68 | 0.67 (0.27-0.87)  | 0.72 (0.36-0.89)  | 0.60 (0.16-0.84)  | 0.80 (0.51-0.93)  | 0.66 (0.26-0.87)  | 0.82 (0.58-0.93)  | 0.69 (0.31-0.88)  |
| Right lingual gyrus                     | 0.85 | 0.82 | 0.86 | 0.87 | 0.88 | 0.82 | 0.82 | 0.82 (0.57-0.93)  | 0.80 (0.52-0.92)  | 0.82 (0.54-0.94)  | 0.86 (0.65-0.95)  | 0.85 (0.64-0.95)  | 0.79 (0.51-0.92)  | 0.79 (0.50-0.92)  |
| Right medial orbitofrontal cortex       | 0.51 | 0.72 | 0.61 | 0.55 | 0.69 | 0.54 | 0.66 | 0.51 (0.04-0.80)  | 0.69 (0.30-0.88)  | 0.61 (0.19-0.84)  | 0.55 (0.10-0.82)  | 0.63 (0.21-0.85)  | 0.53 (0.08-0.80)  | 0.67 (0.27-0.87)  |
| Right middle temporal gyrus             | 0.91 | 0.87 | 0.87 | 0.82 | 0.78 | 0.87 | 0.81 | 0.90 (0.73-0.96)  | 0.88 (0.69-0.96)  | 0.87 (0.66-0.95)  | 0.82 (0.56-0.94)  | 0.79 (0.50-0.92)  | 0.84 (0.58-0.94)  | 0.81 (0.53-0.93)  |
| Right parahippocampal gyrus             | 0.85 | 0.91 | 0.85 | 0.88 | 0.84 | 0.89 | 0.87 | 0.85 (0.64-0.95)  | 0.90 (0.74-0.96)  | 0.85 (0.63-0.94)  | 0.89 (0.70-0.96)  | 0.84 (0.60-0.94)  | 0.88 (0.70-0.96)  | 0.87 (0.66-0.95)  |
| Right paracentral lobule                | 0.86 | 0.88 | 0.85 | 0.91 | 0.88 | 0.9  | 0.89 | 0.85 (0.63-0.94)  | 0.88 (0.70-0.96)  | 0.85 (0.63-0.94)  | 0.91 (0.76-0.97)  | 0.88 (0.69-0.96)  | 0.90 (0.75-0.97)  | 0.89 (0.72-0.96)  |
| Right pars opercularis                  | 0.90 | 0.87 | 0.88 | 0.94 | 0.93 | 0.91 | 0.91 | 0.90 (0.74-0.96)  | 0.88 (0.69-0.96)  | 0.88 (0.70-0.96)  | 0.94 (0.85-0.98)  | 0.92 (0.80-0.97)  | 0.91 (0.77-0.97)  | 0.91 (0.77-0.97)  |
| Right pars orbitalis                    | 0.88 | 0.93 | 0.91 | 0.93 | 0.89 | 0.86 | 0.9  | 0.88 (0.69-0.95)  | 0.91 (0.76-0.97)  | 0.91 (0.75-0.97)  | 0.93 (0.82-0.98)  | 0.90 (0.74-0.96)  | 0.85 (0.63-0.94)  | 0.89 (0.72-0.96)  |
| Right pars triangularis                 | 0.71 | 0.81 | 0.75 | 0.85 | 0.77 | 0.83 | 0.79 | 0.72 (0.36-0.89)  | 0.82 (0.55-0.93)  | 0.76 (0.44-0.91)  | 0.85 (0.63-0.95)  | 0.78 (0.48-0.92)  | 0.83 (0.58-0.94)  | 0.80 (0.51-0.93)  |
| Right pericalcarine cortex              | 0.87 | 0.9  | 0.85 | 0.89 | 0.86 | 0.88 | 0.87 | 0.87 (0.68-0.95)  | 0.89 (0.73-0.96)  | 0.85 (0.62-0.94)  | 0.88 (0.71-0.96)  | 0.87 (0.66-0.95)  | 0.88 (0.69-0.95)  | 0.88 (0.68-0.95)  |
| Right postcentral gyrus                 | 0.91 | 0.95 | 0.93 | 0.94 | 0.92 | 0.94 | 0.92 | 0.91 (0.76-0.97)  | 0.94 (0.83-0.98)  | 0.92 (0.80-0.97)  | 0.93 (0.81-0.97)  | 0.91 (0.77-0.97)  | 0.94 (0.84-0.98)  | 0.92 (0.78-0.97)  |
| Right posterior cingulate cortex        | 0.92 | 0.9  | 0.88 | 0.85 | 0.91 | 0.89 | 0.87 | 0.90 (0.73-0.96)  | 0.89 (0.72-0.96)  | 0.87 (0.67-0.95)  | 0.84 (0.60-0.94)  | 0.90 (0.73-0.96)  | 0.89 (0.70-0.96)  | 0.86 (0.66-0.95)  |
| Right precentral gyrus                  | 0.76 | 0.82 | 0.82 | 0.86 | 0.82 | 0.81 | 0.77 | 0.76 (0.44-0.91)  | 0.83 (0.57-0.94)  | 0.82 (0.56-0.93)  | 0.86 (0.64-0.95)  | 0.83 (0.57-0.94)  | 0.81 (0.55-0.93)  | 0.77 (0.46-0.91)  |
| Right precuneus                         | 0.85 | 0.87 | 0.84 | 0.9  | 0.89 | 0.94 | 0.88 | 0.84 (0.60-0.94)  | 0.80 (0.53-0.93)  | 0.83 (0.57-0.94)  | 0.88 (0.70-0.96)  | 0.88 (0.70-0.96)  | 0.89 (0.73-0.96)  | 0.87 (0.67-0.95)  |
| Right rostral anterior cingulate cortex | 0.86 | 0.82 | 0.79 | 0.77 | 0.79 | 0.84 | 0.82 | 0.87 (0.67-0.95)  | 0.83 (0.58-0.94)  | 0.80 (0.51-0.92)  | 0.78 (0.47-0.92)  | 0.80 (0.51-0.93)  | 0.84 (0.60-0.94)  | 0.82 (0.57-0.93)  |
| Right rostral middle frontal gyrus      | 0.07 | 0.35 | 0.22 | 0.44 | 0.19 | 0.51 | 0.2  | 0.07 (-0.42-0.53) | 0.31 (-0.18-0.68) | 0.21 (-0.29-0.62) | 0.42 (-0.06-0.75) | 0.17 (-0.27-0.58) | 0.51 (0.03-0.80)  | 0.19 (-0.30-0.61) |

|                                                      |      |      |      |      |       |      |      |                  |                  |                  |                   |                    |                   |                  |
|------------------------------------------------------|------|------|------|------|-------|------|------|------------------|------------------|------------------|-------------------|--------------------|-------------------|------------------|
| Right superior frontal gyrus                         | 0.64 | 0.76 | 0.72 | 0.89 | 0.73  | 0.81 | 0.68 | 0.62 (0.22-0.85) | 0.73 (0.39-0.89) | 0.71 (0.36-0.89) | 0.84 (0.59-0.94)  | 0.67 (0.28-0.87)   | 0.82 (0.56-0.93)  | 0.67 (0.30-0.87) |
| Right superior parietal cortex                       | 0.84 | 0.86 | 0.87 | 0.89 | 0.91  | 0.87 | 0.79 | 0.84 (0.60-0.94) | 0.85 (0.62-0.94) | 0.86 (0.65-0.95) | 0.87 (0.67-0.95)  | 0.88 (0.71-0.96)   | 0.84 (0.60-0.94)  | 0.79 (0.49-0.92) |
| Right superior temporal gyrus                        | 0.91 | 0.9  | 0.92 | 0.92 | 0.89  | 0.94 | 0.92 | 0.89 (0.72-0.96) | 0.90 (0.75-0.96) | 0.91 (0.75-0.97) | 0.91 (0.77-0.97)  | 0.87 (0.66-0.95)   | 0.94 (0.84-0.98)  | 0.91 (0.75-0.97) |
| Right supramarginal gyrus                            | 0.83 | 0.92 | 0.91 | 0.86 | 0.84  | 0.85 | 0.81 | 0.83 (0.59-0.94) | 0.92 (0.78-0.97) | 0.91 (0.75-0.97) | 0.86 (0.66-0.95)  | 0.83 (0.60-0.94)   | 0.84 (0.60-0.94)  | 0.82 (0.55-0.93) |
| Right frontal pole                                   | 0.52 | 0.59 | 0.54 | 0.67 | -0.07 | 0.81 | 0.69 | 0.48 (0.03-0.78) | 0.60 (0.15-0.84) | 0.53 (0.07-0.81) | 0.67 (0.28-0.87)  | -0.06 (-0.54-0.44) | 0.81 (0.54-0.93)  | 0.68 (0.29-0.87) |
| Right temporal pole                                  | 0.68 | 0.68 | 0.52 | 0.59 | 0.44  | 0.66 | 0.52 | 0.60 (0.19-0.84) | 0.59 (0.18-0.83) | 0.48 (0.02-0.77) | 0.52 (0.07-0.80)  | 0.40 (-0.08-0.74)  | 0.56 (0.13-0.82)  | 0.45 (0.00-0.76) |
| Right transverse temporal gyrus                      | 0.91 | 0.88 | 0.89 | 0.91 | 0.89  | 0.91 | 0.88 | 0.91 (0.77-0.97) | 0.87 (0.68-0.95) | 0.88 (0.69-0.96) | 0.89 (0.72-0.96)  | 0.88 (0.70-0.96)   | 0.90 (0.75-0.96)  | 0.88 (0.69-0.95) |
| Right insula                                         | 0.69 | 0.7  | 0.72 | 0.49 | 0.58  | 0.52 | 0.64 | 0.67 (0.28-0.87) | 0.70 (0.33-0.88) | 0.69 (0.32-0.88) | 0.43 (-0.03-0.75) | 0.52 (0.06-0.80)   | 0.42 (-0.08-0.75) | 0.64 (0.24-0.86) |
| <b>Global brain measures</b>                         |      |      |      |      |       |      |      |                  |                  |                  |                   |                    |                   |                  |
| Left total cortical volume (ml)                      | 0.99 | 0.99 | 0.99 | 0.99 | 0.99  | 0.99 | 0.99 | 0.98 (0.96-0.99) | 0.99 (0.97-1.00) | 0.99 (0.96-1.00) | 0.99 (0.96-1.00)  | 0.98 (0.96-0.99)   | 0.99 (0.97-1.00)  | 0.99 (0.96-1.00) |
| Right total cortical volume (ml)                     | 0.97 | 0.98 | 0.98 | 0.98 | 0.98  | 0.98 | 0.98 | 0.98 (0.93-0.99) | 0.98 (0.95-0.99) | 0.98 (0.94-0.99) | 0.98 (0.95-0.99)  | 0.98 (0.93-0.99)   | 0.98 (0.94-0.99)  | 0.98 (0.94-0.99) |
| Left total cortical white matter (ml)                | 1.00 | 1    | 1    | 1    | 1     | 1    | 1    | 1.00 (0.99-1.00) | 1.00 (1.00-1.00) | 1.00 (0.99-1.00) | 1.00 (1.00-1.00)  | 1.00 (0.99-1.00)   | 1.00 (1.00-1.00)  | 1.00 (0.99-1.00) |
| Right total cortical white matter (ml)               | 1.00 | 1    | 1    | 1    | 1     | 1    | 1    | 1.00 (0.99-1.00) | 1.00 (0.99-1.00) | 1.00 (0.99-1.00) | 1.00 (0.99-1.00)  | 1.00 (0.99-1.00)   | 1.00 (0.99-1.00)  | 1.00 (0.99-1.00) |
| Left total cortical surface area (cm <sup>2</sup> )  | 1.00 | 1    | 1    | 1    | 1     | 1    | 1    | 1.00 (0.99-1.00) | 1.00 (0.99-1.00) | 1.00 (0.99-1.00) | 1.00 (0.99-1.00)  | 1.00 (0.99-1.00)   | 1.00 (0.99-1.00)  | 1.00 (0.99-1.00) |
| Right total cortical surface area (cm <sup>2</sup> ) | 1.00 | 1    | 1    | 1    | 1     | 1    | 1    | 1.00 (1.00-1.00) | 1.00 (0.99-1.00) | 1.00 (1.00-1.00) | 1.00 (1.00-1.00)  | 1.00 (1.00-1.00)   | 1.00 (1.00-1.00)  | 1.00 (1.00-1.00) |
| Left mean cortical thickness (mm)                    | 0.89 | 0.95 | 0.93 | 0.9  | 0.88  | 0.89 | 0.88 | 0.89 (0.72-0.96) | 0.96 (0.88-0.98) | 0.93 (0.81-0.97) | 0.90 (0.74-0.96)  | 0.88 (0.69-0.95)   | 0.89 (0.73-0.96)  | 0.89 (0.71-0.96) |
| Right mean cortical thickness (mm)                   | 0.74 | 0.86 | 0.81 | 0.85 | 0.78  | 0.85 | 0.79 | 0.74 (0.41-0.90) | 0.84 (0.60-0.94) | 0.80 (0.53-0.93) | 0.84 (0.59-0.94)  | 0.77 (0.47-0.91)   | 0.85 (0.64-0.95)  | 0.79 (0.49-0.92) |
| Left cerebellar white matter (ml)                    | 0.90 | 0.91 | 0.89 | 0.91 | 0.91  | 0.92 | 0.93 | 0.90 (0.74-0.96) | 0.91 (0.76-0.97) | 0.89 (0.71-0.96) | 0.91 (0.76-0.97)  | 0.90 (0.73-0.96)   | 0.92 (0.79-0.97)  | 0.92 (0.79-0.97) |
| Right cerebellar white matter (ml)                   | 0.93 | 0.95 | 0.96 | 0.96 | 0.95  | 0.94 | 0.95 | 0.93 (0.80-0.97) | 0.95 (0.87-0.98) | 0.96 (0.88-0.98) | 0.96 (0.89-0.99)  | 0.95 (0.86-0.98)   | 0.94 (0.84-0.98)  | 0.94 (0.85-0.98) |
| Left cerebellar gray matter (ml)                     | 0.99 | 0.99 | 0.99 | 0.99 | 0.99  | 0.99 | 0.99 | 0.99 (0.98-1.00) | 0.99 (0.97-1.00) | 0.99 (0.97-1.00) | 0.99 (0.97-1.00)  | 0.99 (0.97-1.00)   | 0.99 (0.97-1.00)  | 0.99 (0.97-1.00) |
| Right cerebellar gray matter (ml)                    | 1.00 | 0.99 | 1    | 0.99 | 0.99  | 1    | 0.99 | 1.00 (0.99-1.00) | 0.99 (0.98-1.00) | 1.00 (0.99-1.00) | 0.99 (0.98-1.00)  | 0.99 (0.98-1.00)   | 1.00 (0.99-1.00)  | 0.99 (0.98-1.00) |
| Intracranial volume (ml)                             | 0.99 | 0.99 | 0.99 | 0.99 | 0.97  | 1    | 0.98 | 0.99 (0.98-1.00) | 0.99 (0.96-1.00) | 0.99 (0.98-1.00) | 0.98 (0.95-0.99)  | 0.95 (0.80-0.98)   | 1.00 (0.99-1.00)  | 0.97 (0.89-0.99) |
| Total brain volume without ventricles (ml)           | 1.00 | 1    | 1    | 1    | 1     | 1    | 1    | 1.00 (0.99-1.00) | 1.00 (1.00-1.00) | 1.00 (0.99-1.00) | 1.00 (0.99-1.00)  | 1.00 (0.99-1.00)   | 1.00 (1.00-1.00)  | 1.00 (0.99-1.00) |

Abbreviations: Orig = Original scan; FS df =FreeSurfer defacing; FSL df =FSL defacing; FM = Face Masking; Suffix 1 and 2 indicate first and second scan respectively, i.e. test-retest; ICC = intraclass correlation coefficient; CI = confidence interval.
